# Supplementary material
Source: PubMed Central journal article supplement (PMC4111403)
Supplement: jm5005623_si_001.pdf [file jm5005623_si_001.pdf]

## Supporting Information

### Brain-penetrant, Orally Bioavailable Microtubule-Stabilizing Small Molecules are Potential Candidates Therapeutics for Alzheimer's Disease and Related Tauopathies

Kevin Lou,<sup>a</sup> Yuemang Yao,<sup>b</sup> Adam Hoye,<sup>a</sup> Michael James,<sup>b</sup> Anne-Sophie Cornec,<sup>a</sup> Edward Hyde,<sup>b</sup> Bryant Gay,<sup>a</sup> Virginia M-Y Lee,<sup>b</sup> John Q. Trojanowski,<sup>b</sup> Amos B. Smith III,<sup>a</sup> Kurt R. Brunden,<sup>b,\*</sup> and Carlo Ballatore<sup>a,b,\*</sup>

<sup>a</sup>Department of Chemistry, School of Arts and Sciences, University of Pennsylvania, 231 South 34th St., Philadelphia, PA 19104-6323; <sup>b</sup>Center for Neurodegenerative Diseases Research, Institute on Aging, University of Pennsylvania, 3600 Spruce Street, Philadelphia, PA 19104-6323

Table of Contents

**S2-144.** NMR spectra of test compounds.

**S145-174.** X-ray crystal structures of compounds **23**, **36**, and **43**.

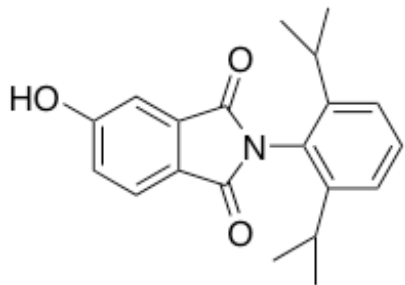

7.89  
7.80  
7.79  
7.49  
7.47  
7.46  
7.37  
7.37  
7.32  
7.31  
7.30  
7.30  
7.27  
7.27  
7.07  
7.07  
7.06  
7.05

2.77  
2.75  
2.74  
2.73  
2.71  
2.25  
2.25  
2.16

1.19  
1.19  
1.18  
1.17

ss sds s

s s

C (d) 7.80  
D (d) 7.37  
B (s) 7.89  
A (t) 7.47  
F (dd) 7.06  
E (d) 7.31

G (p) 2.74  
H (s) 2.16

I (dd) 1.18

0.92  
0.85  
1.00  
0.86  
1.82  
0.91

1.91

0.73

11.01

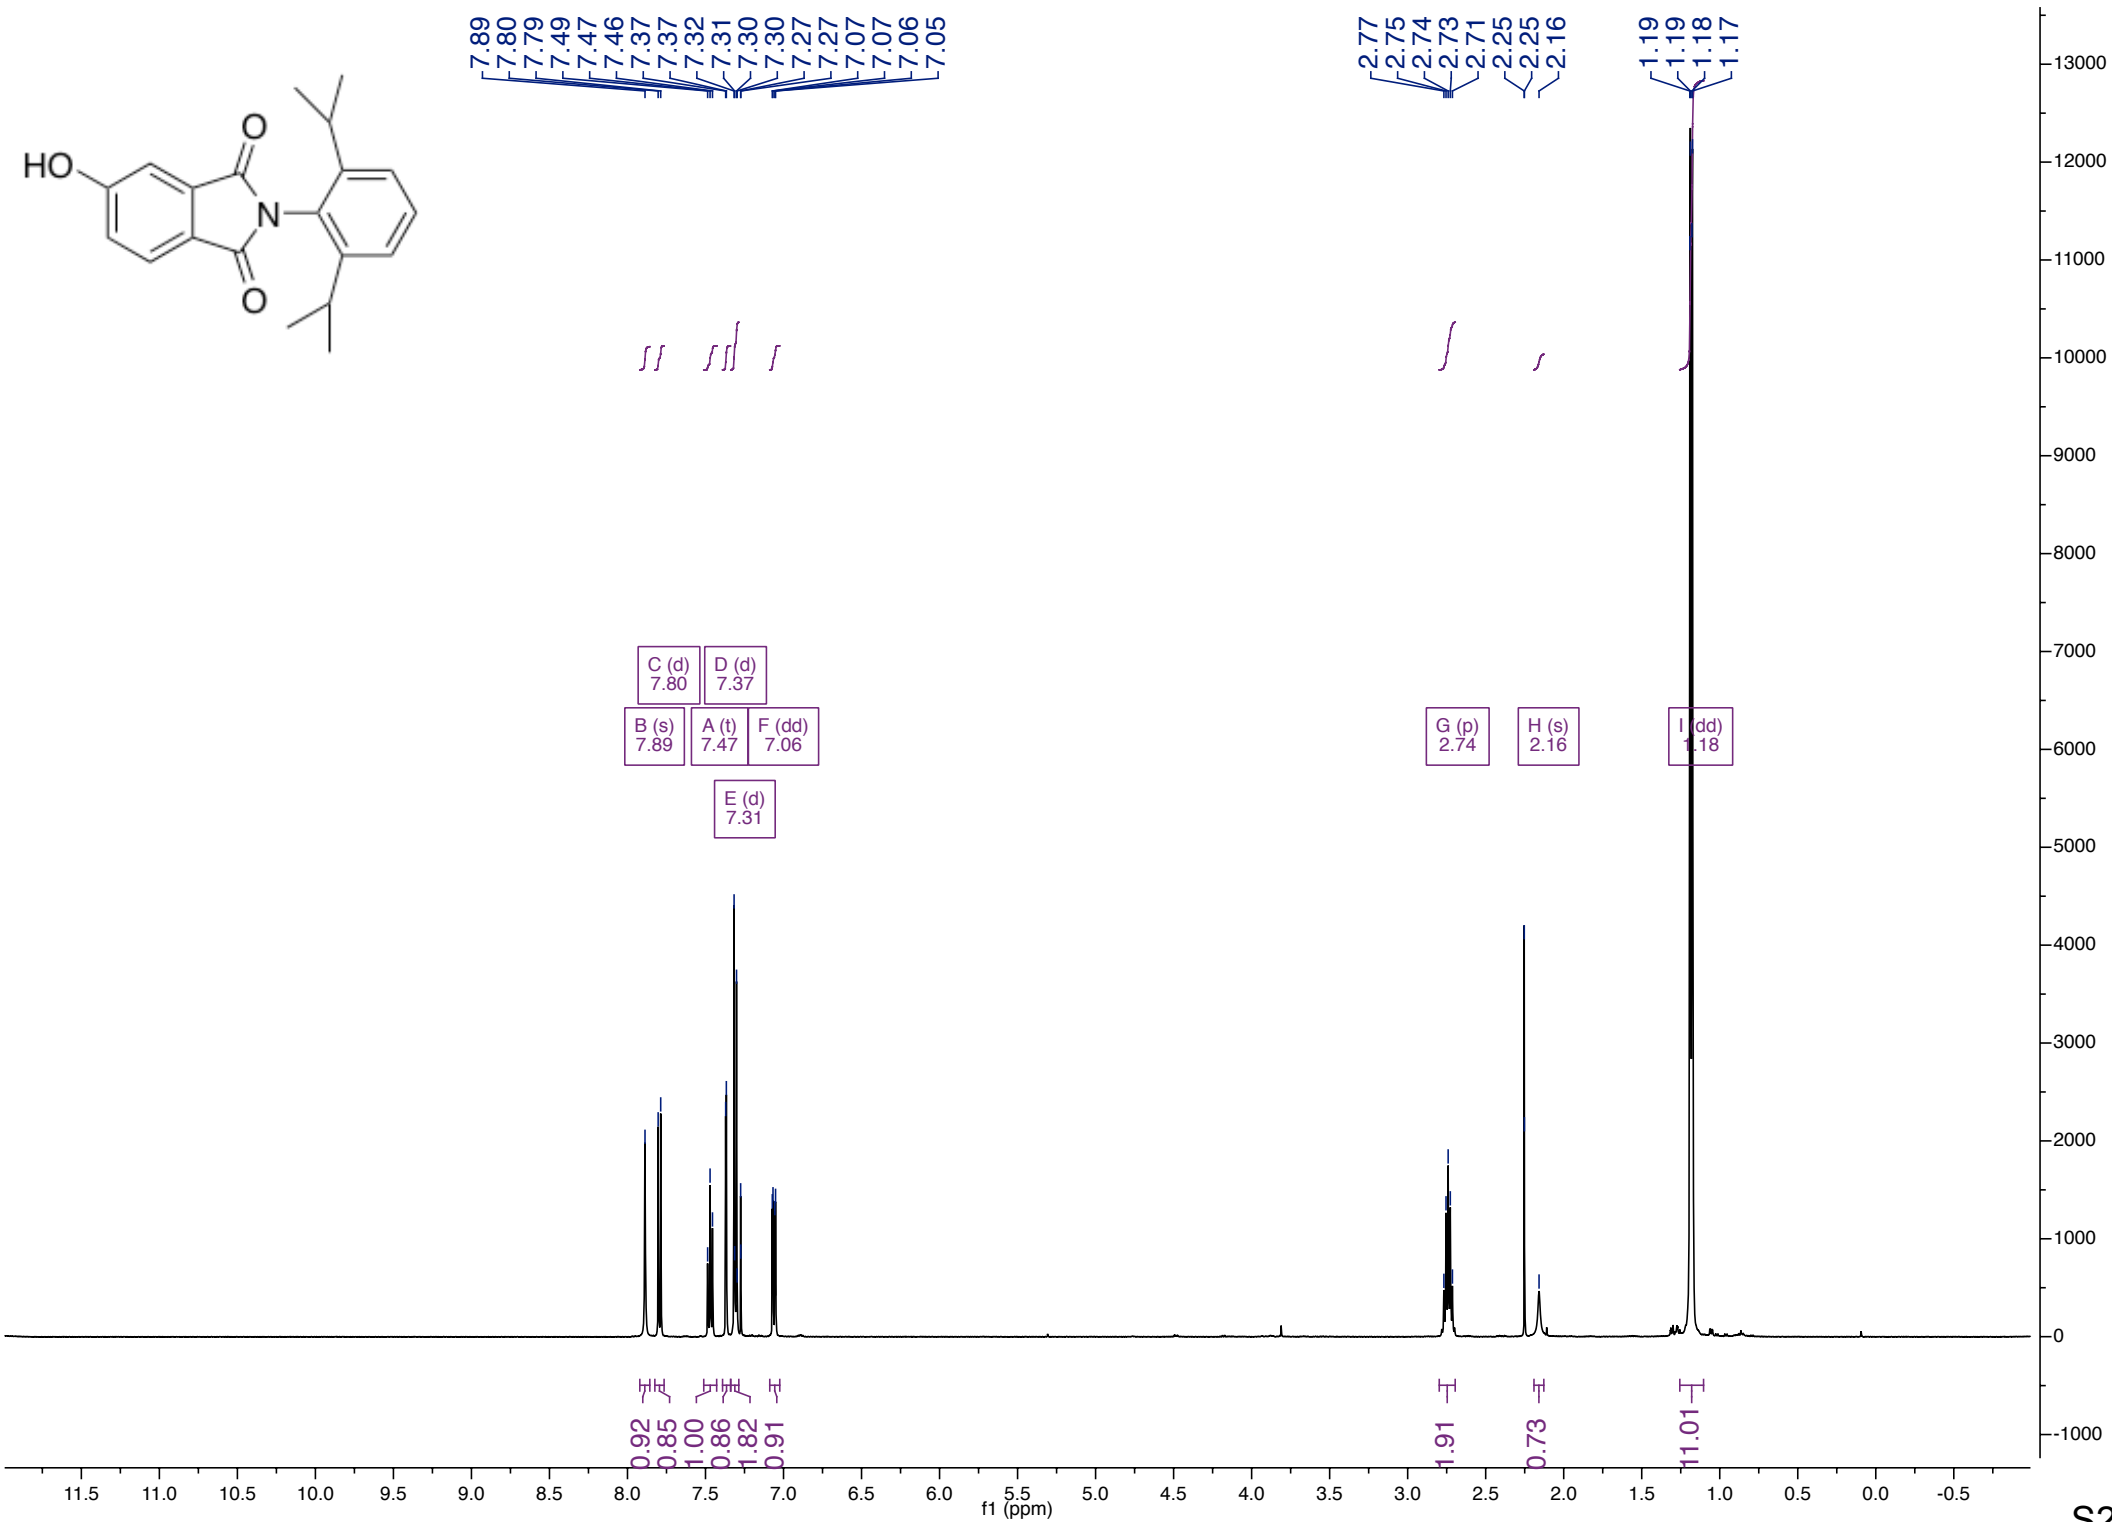

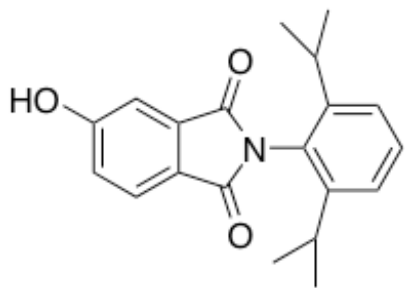

168.70  
168.68  
162.47

147.35

134.35  
130.33  
126.71  
126.11  
124.07  
122.94  
121.07

111.18

29.35  
23.99  
23.97

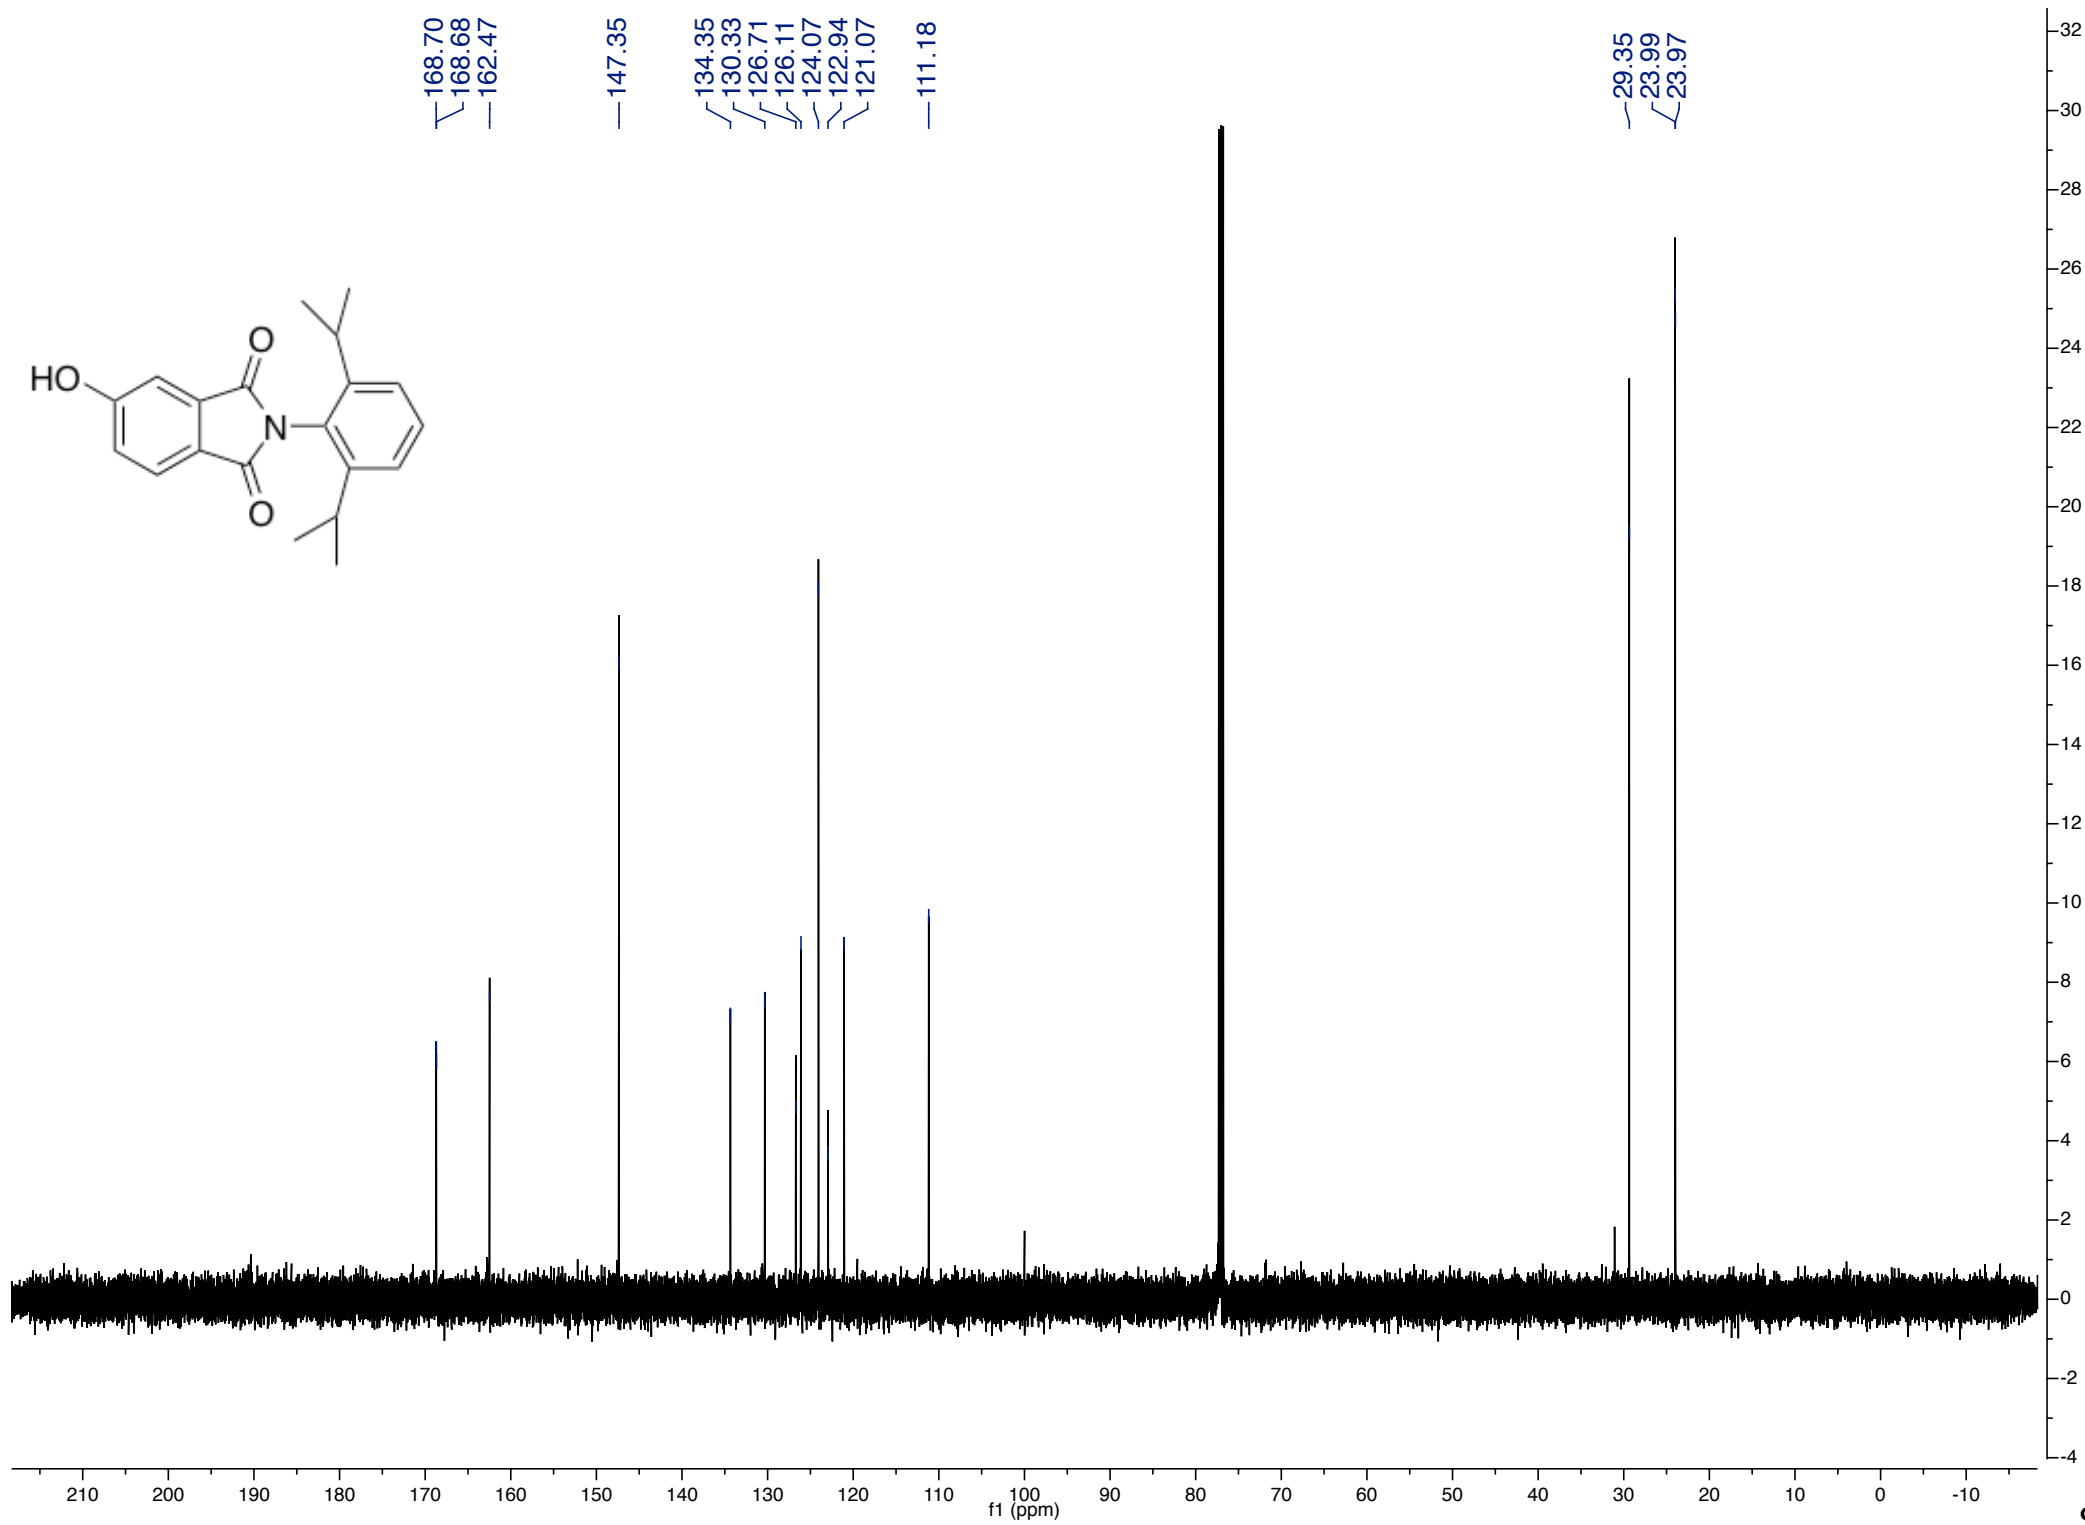

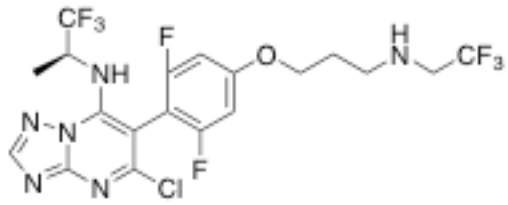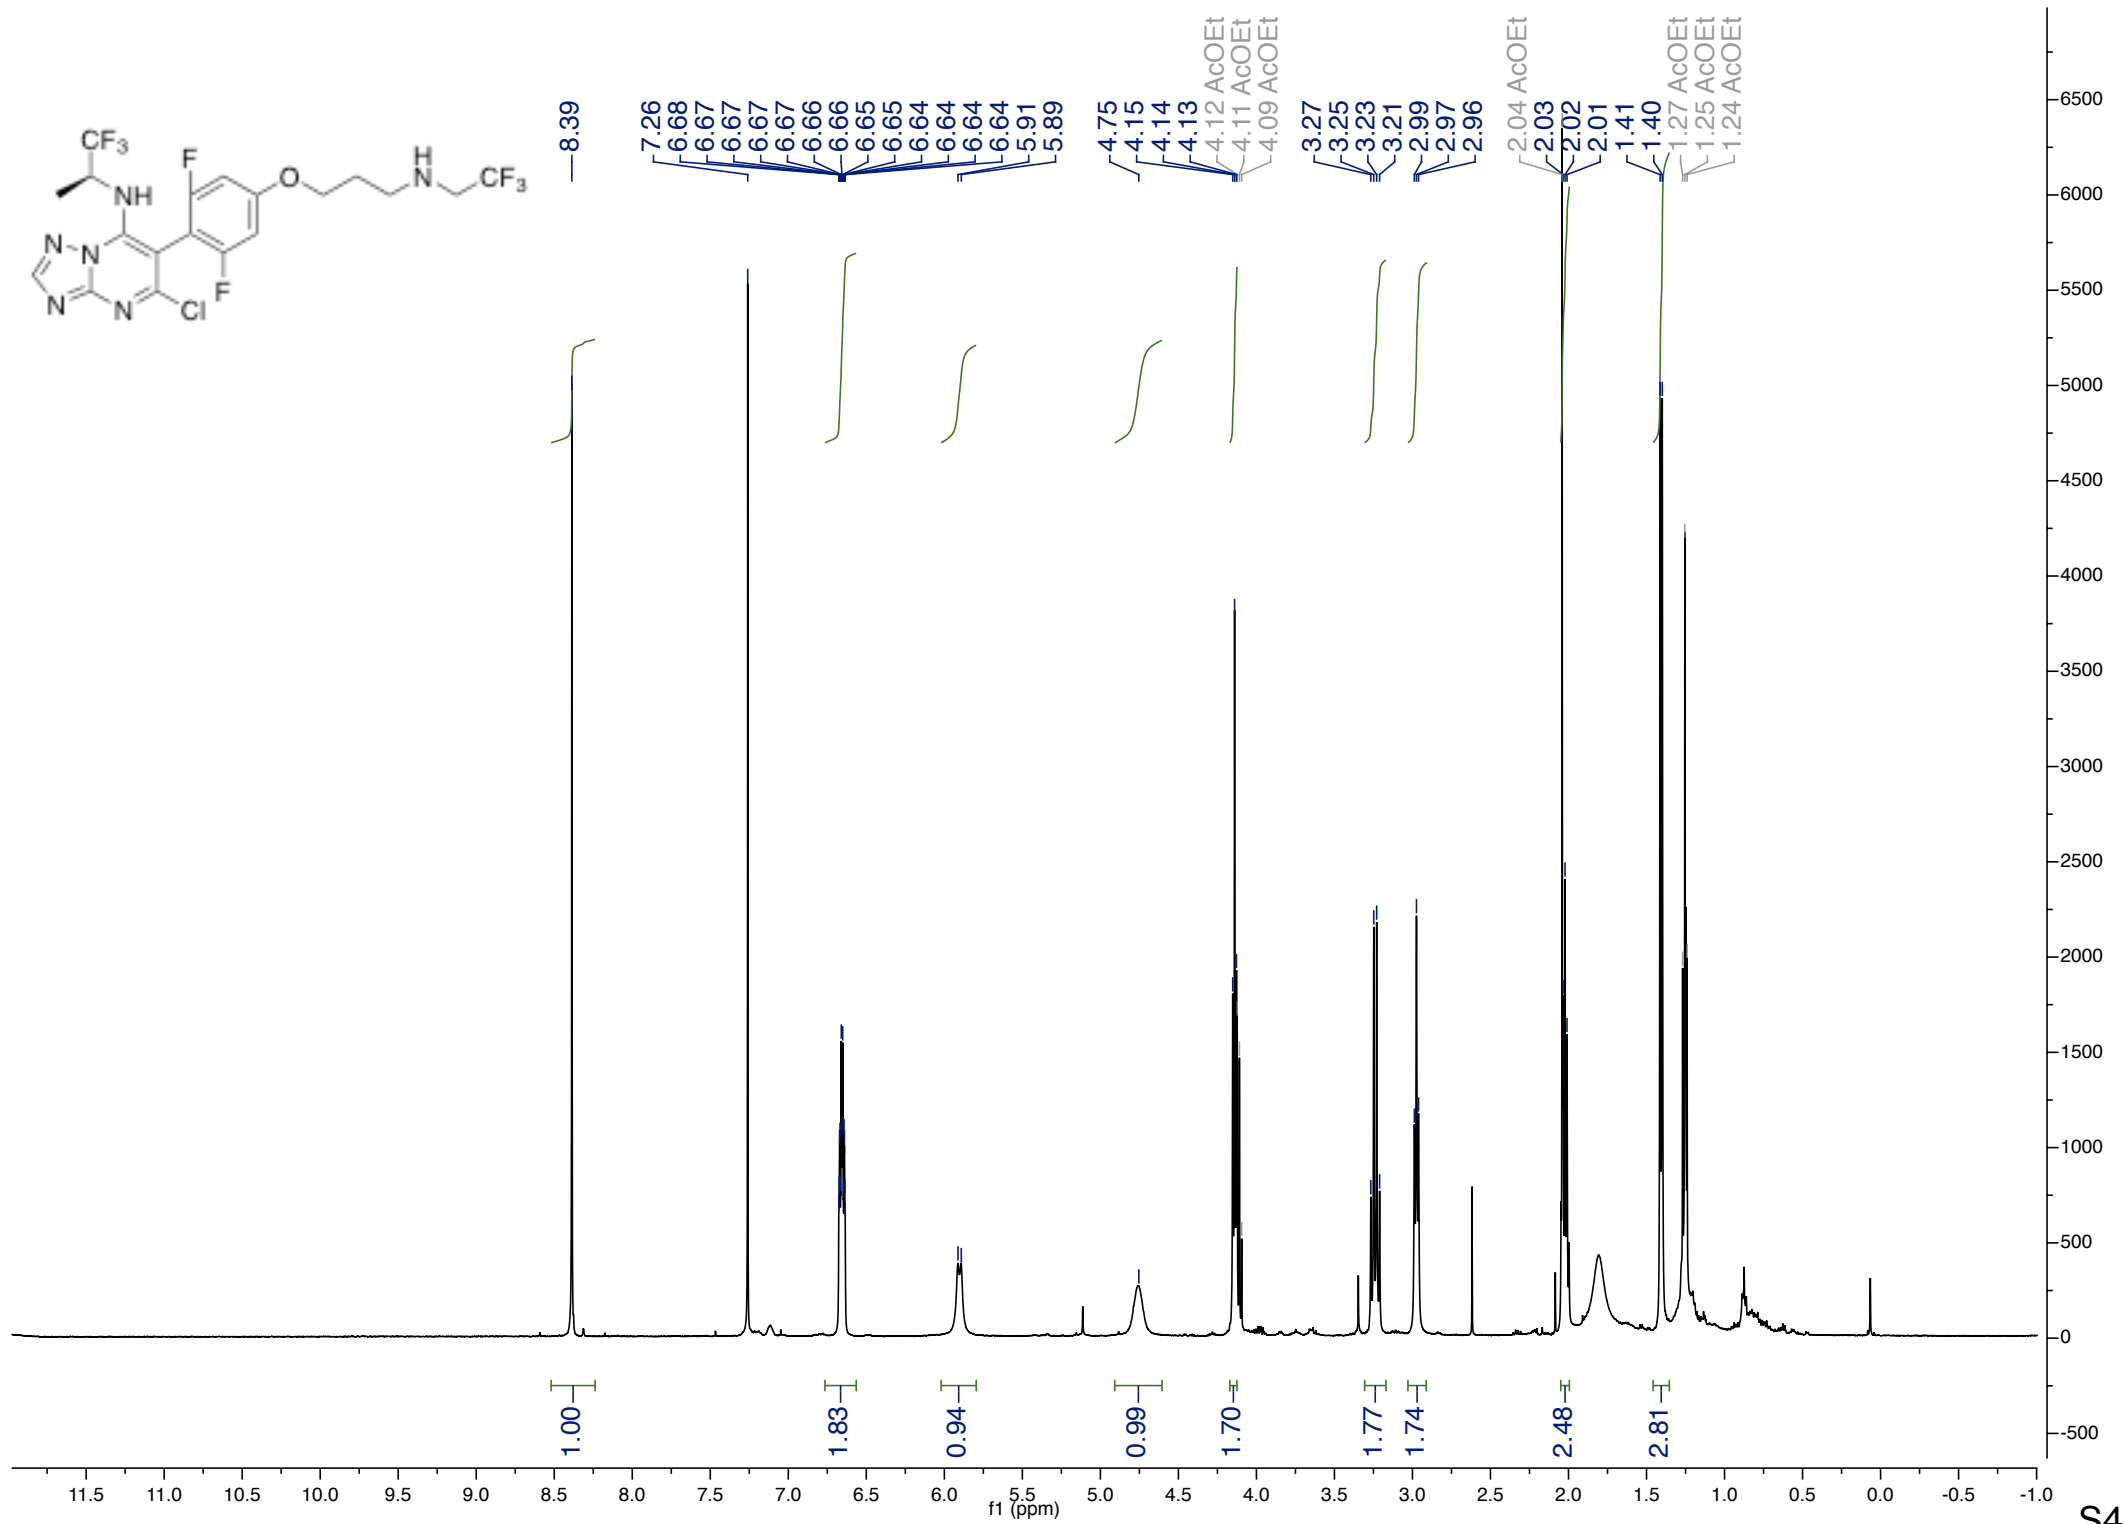

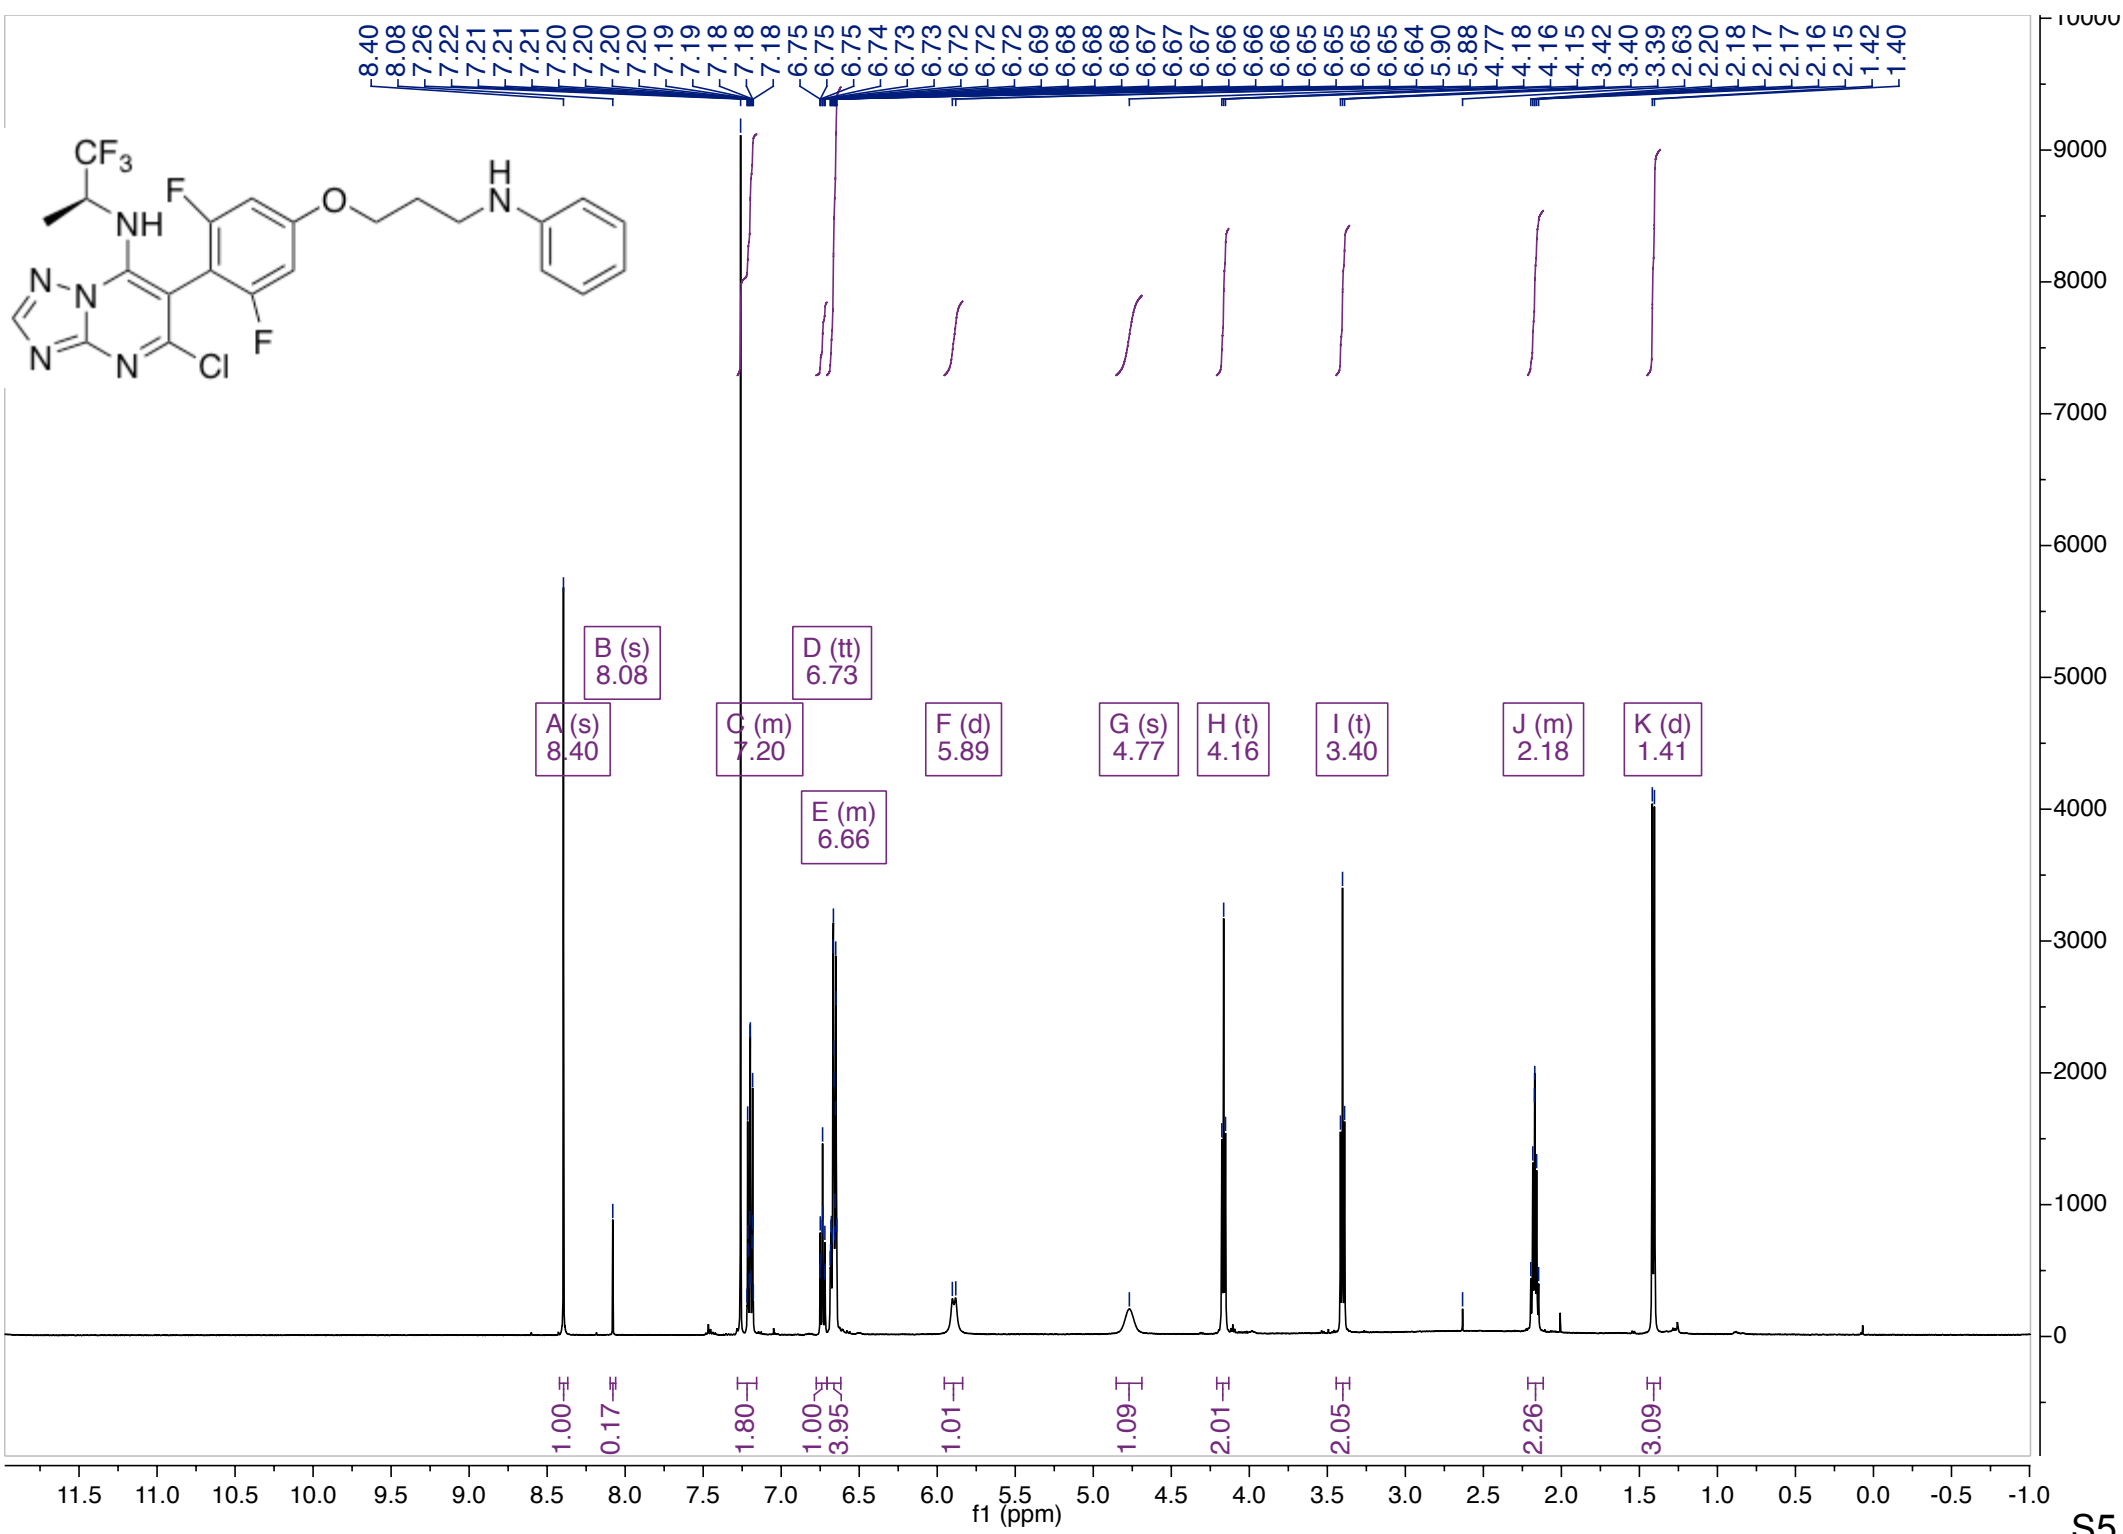

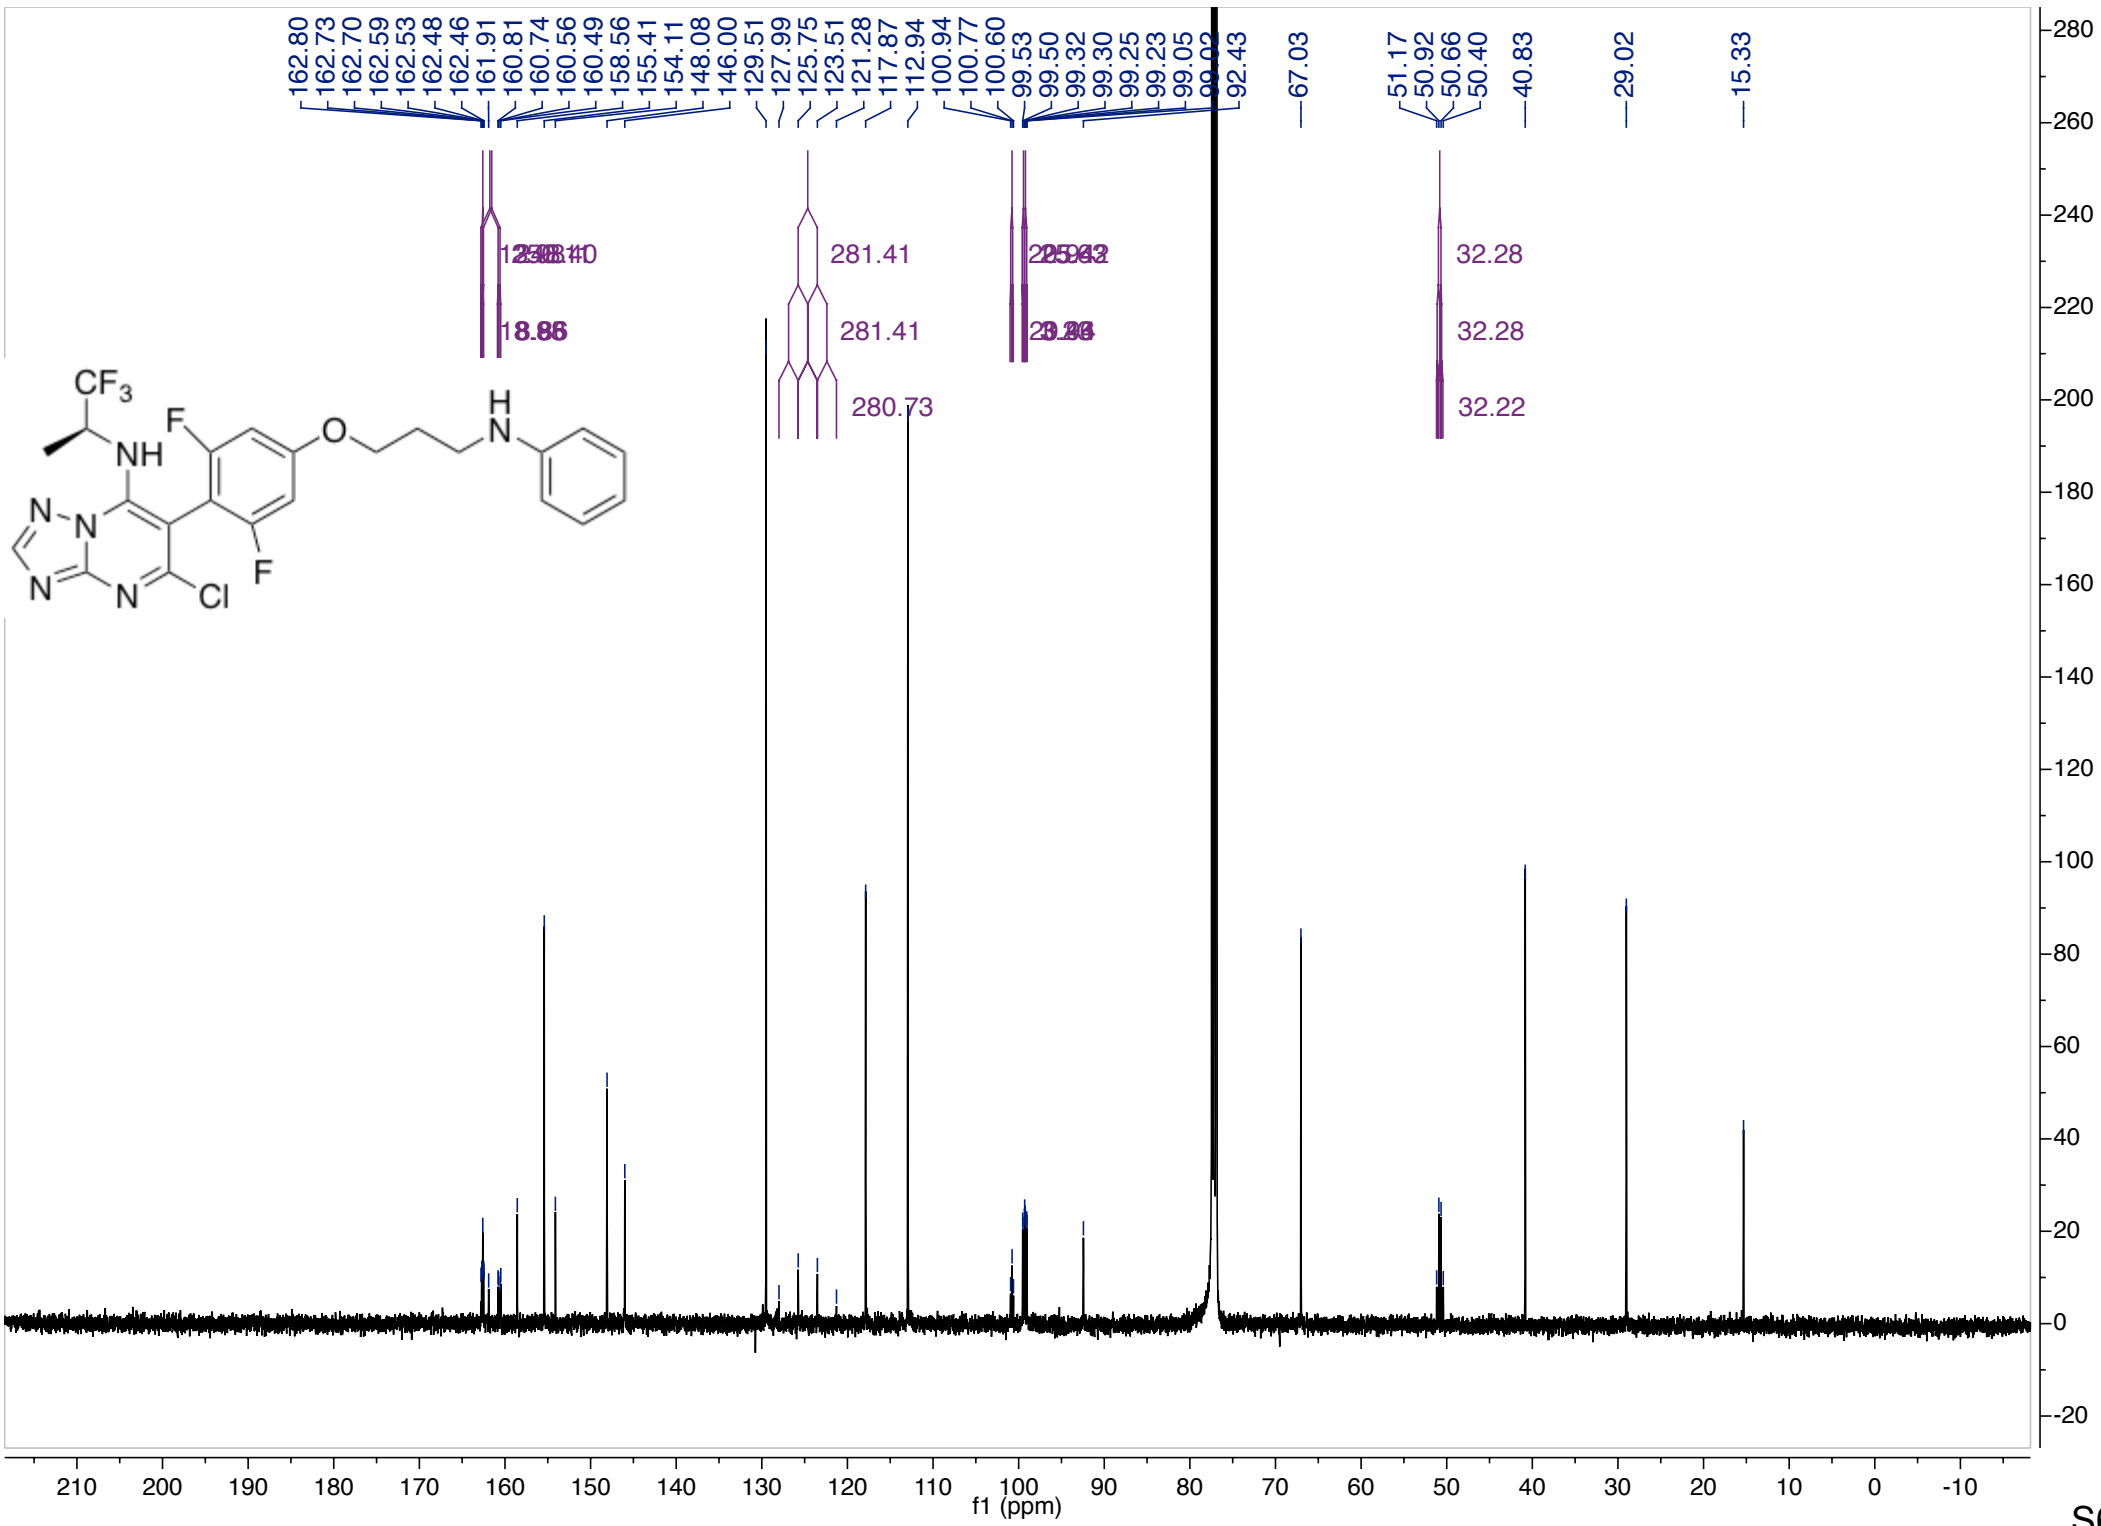

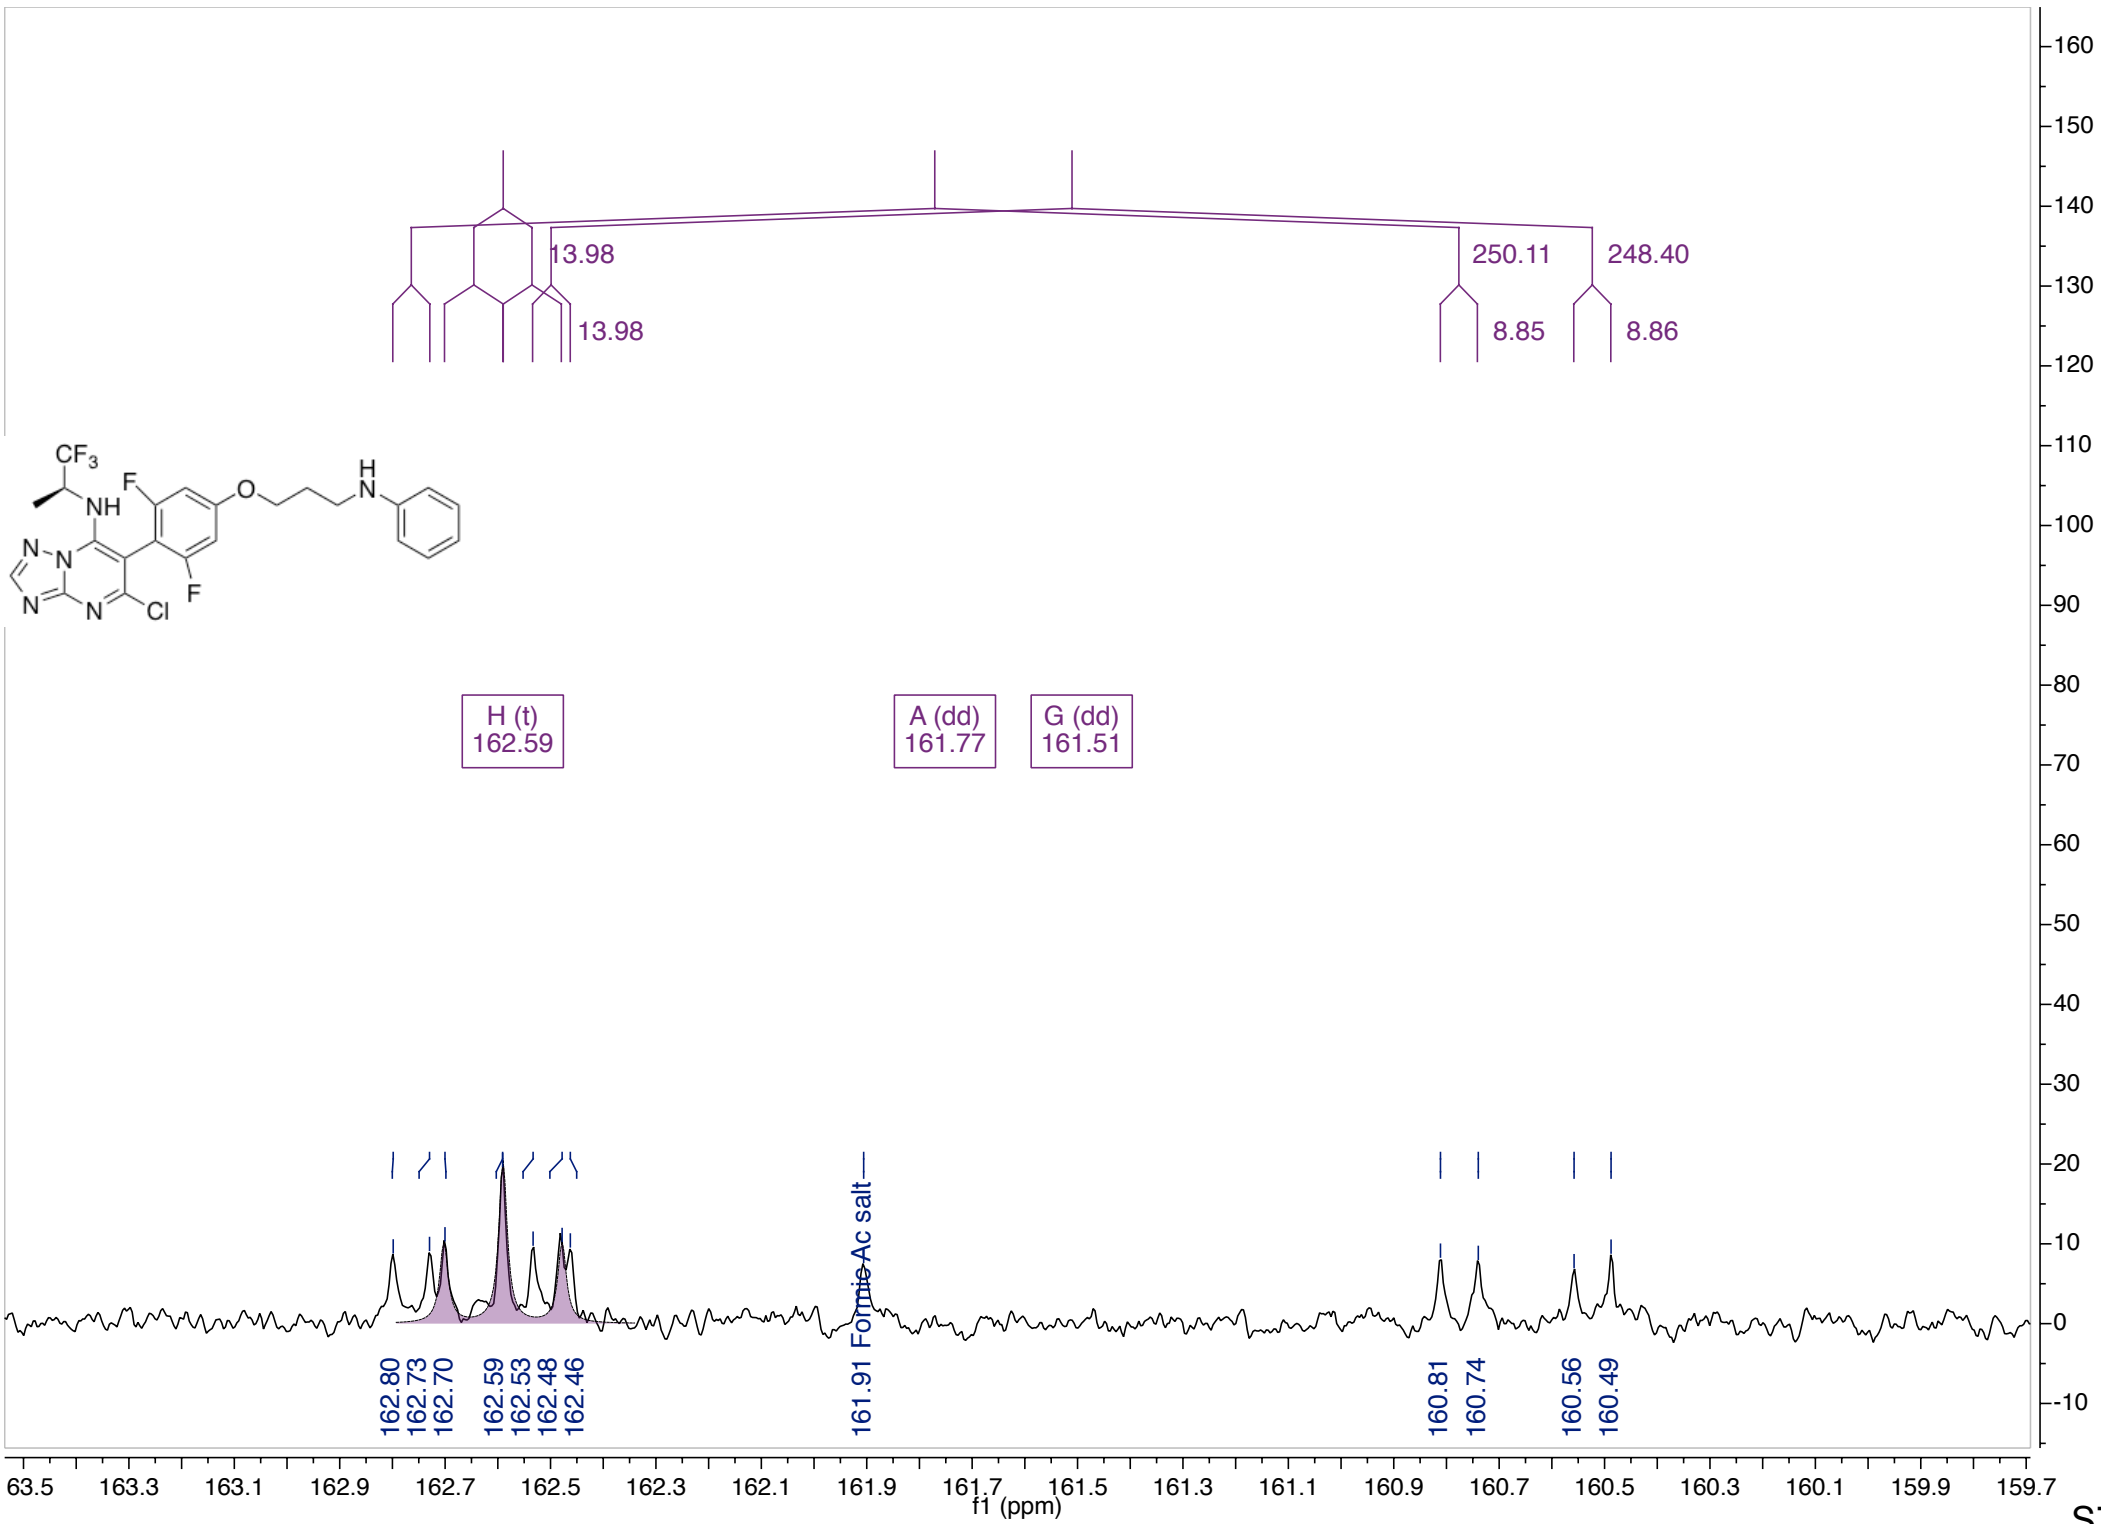

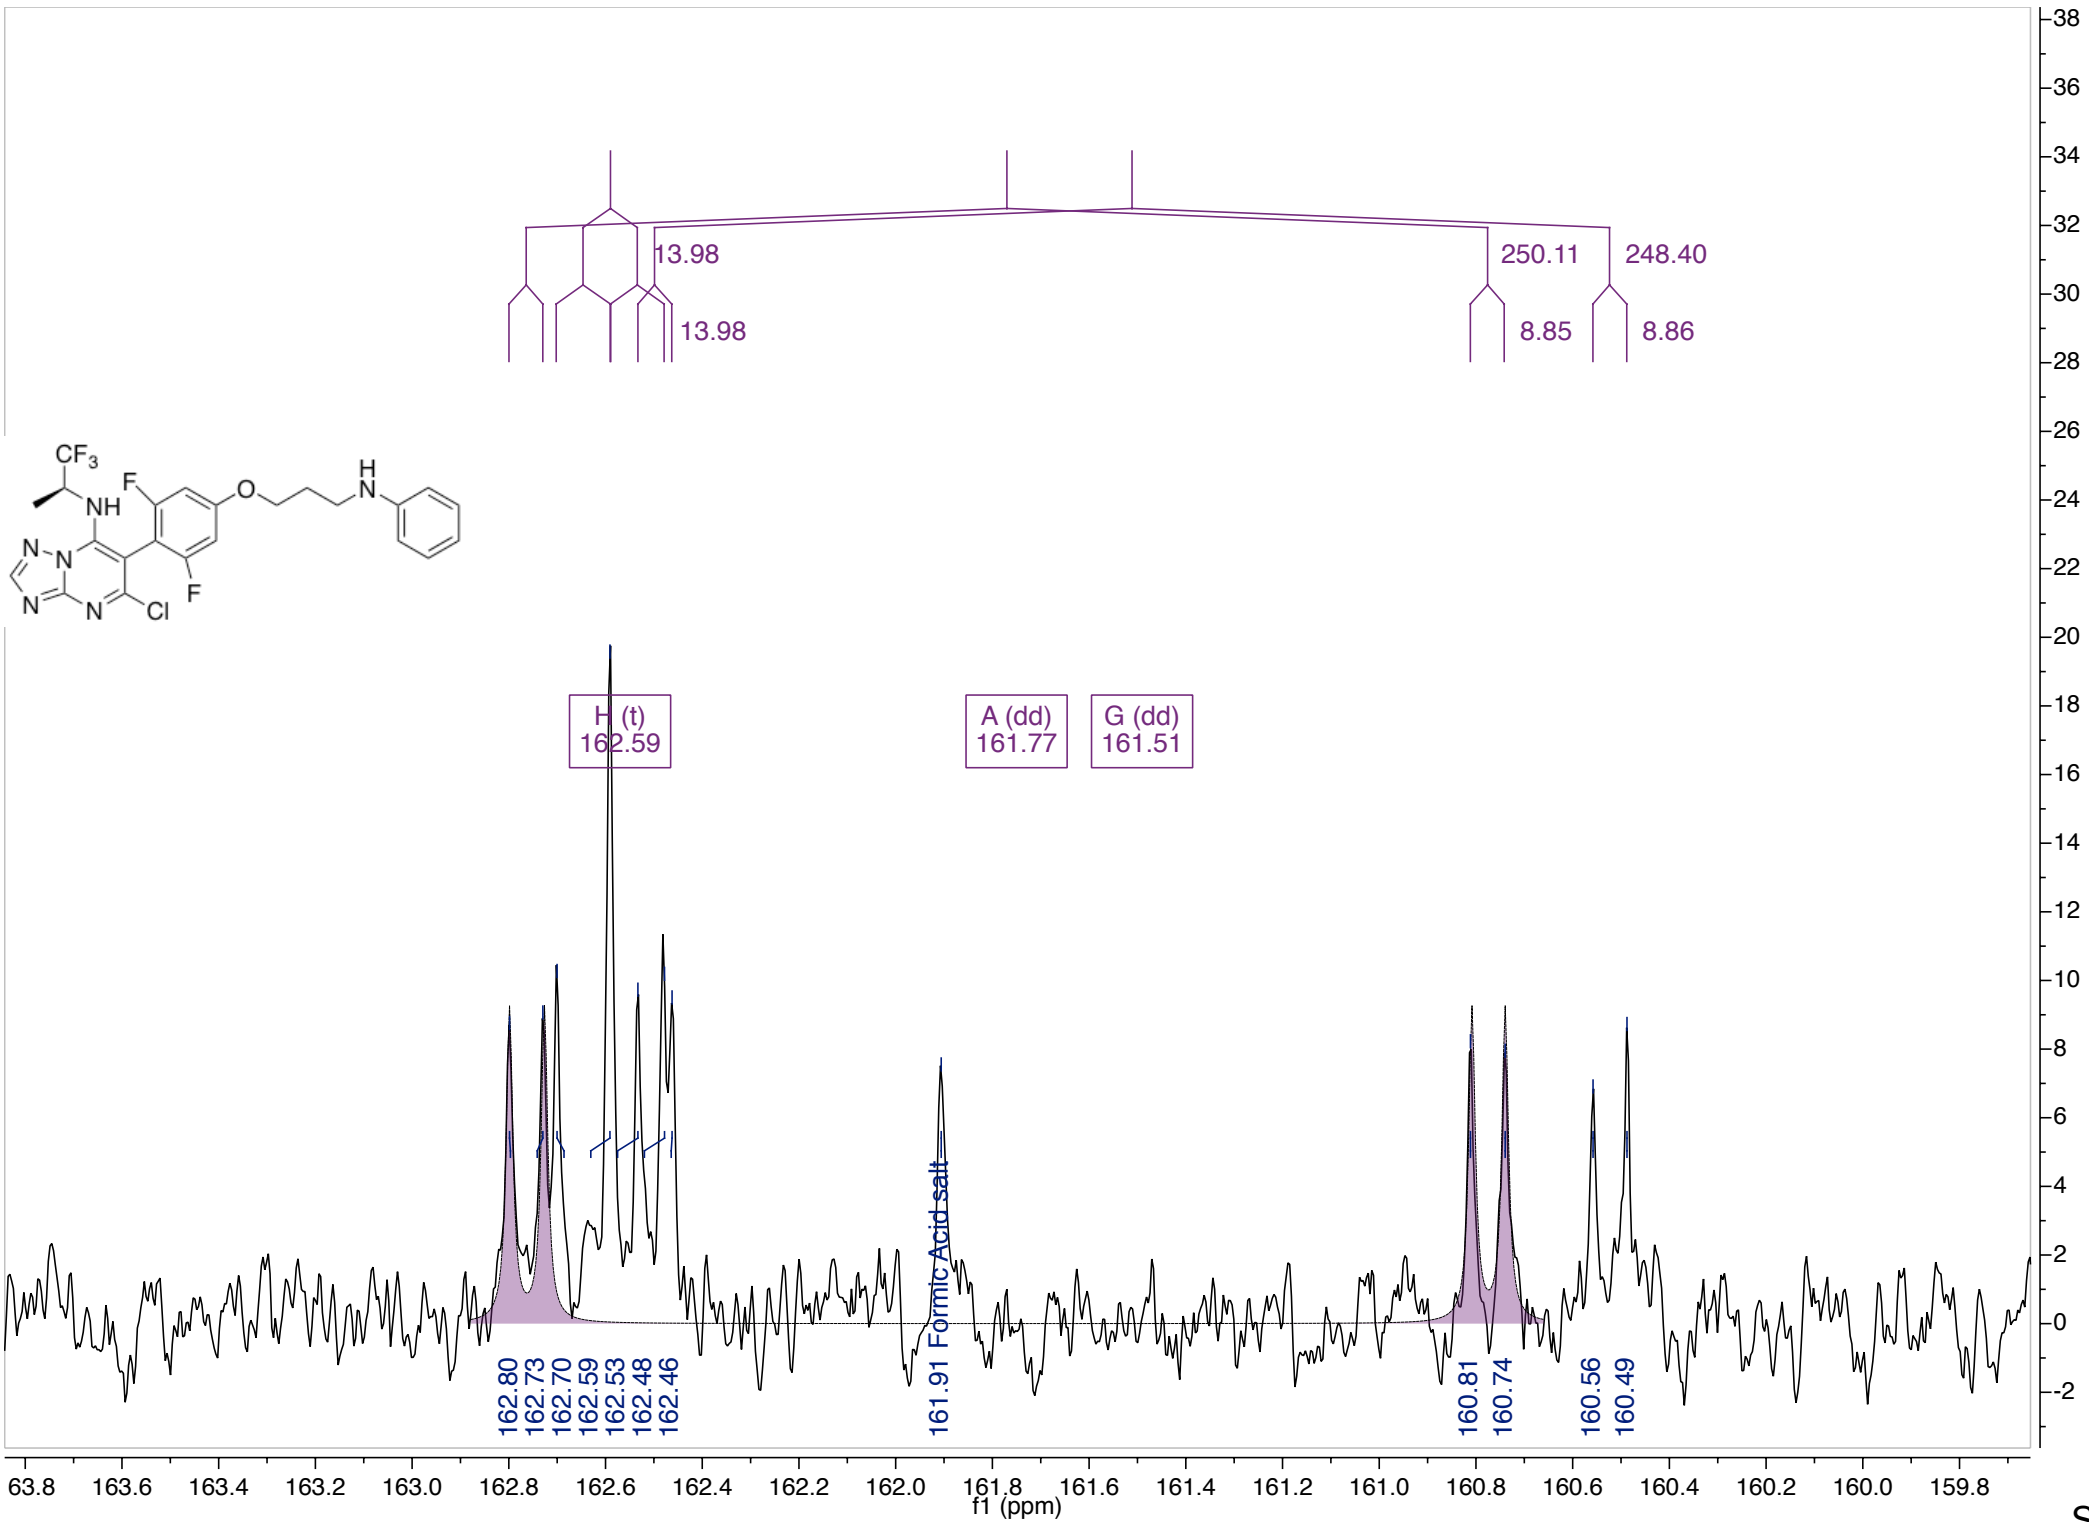



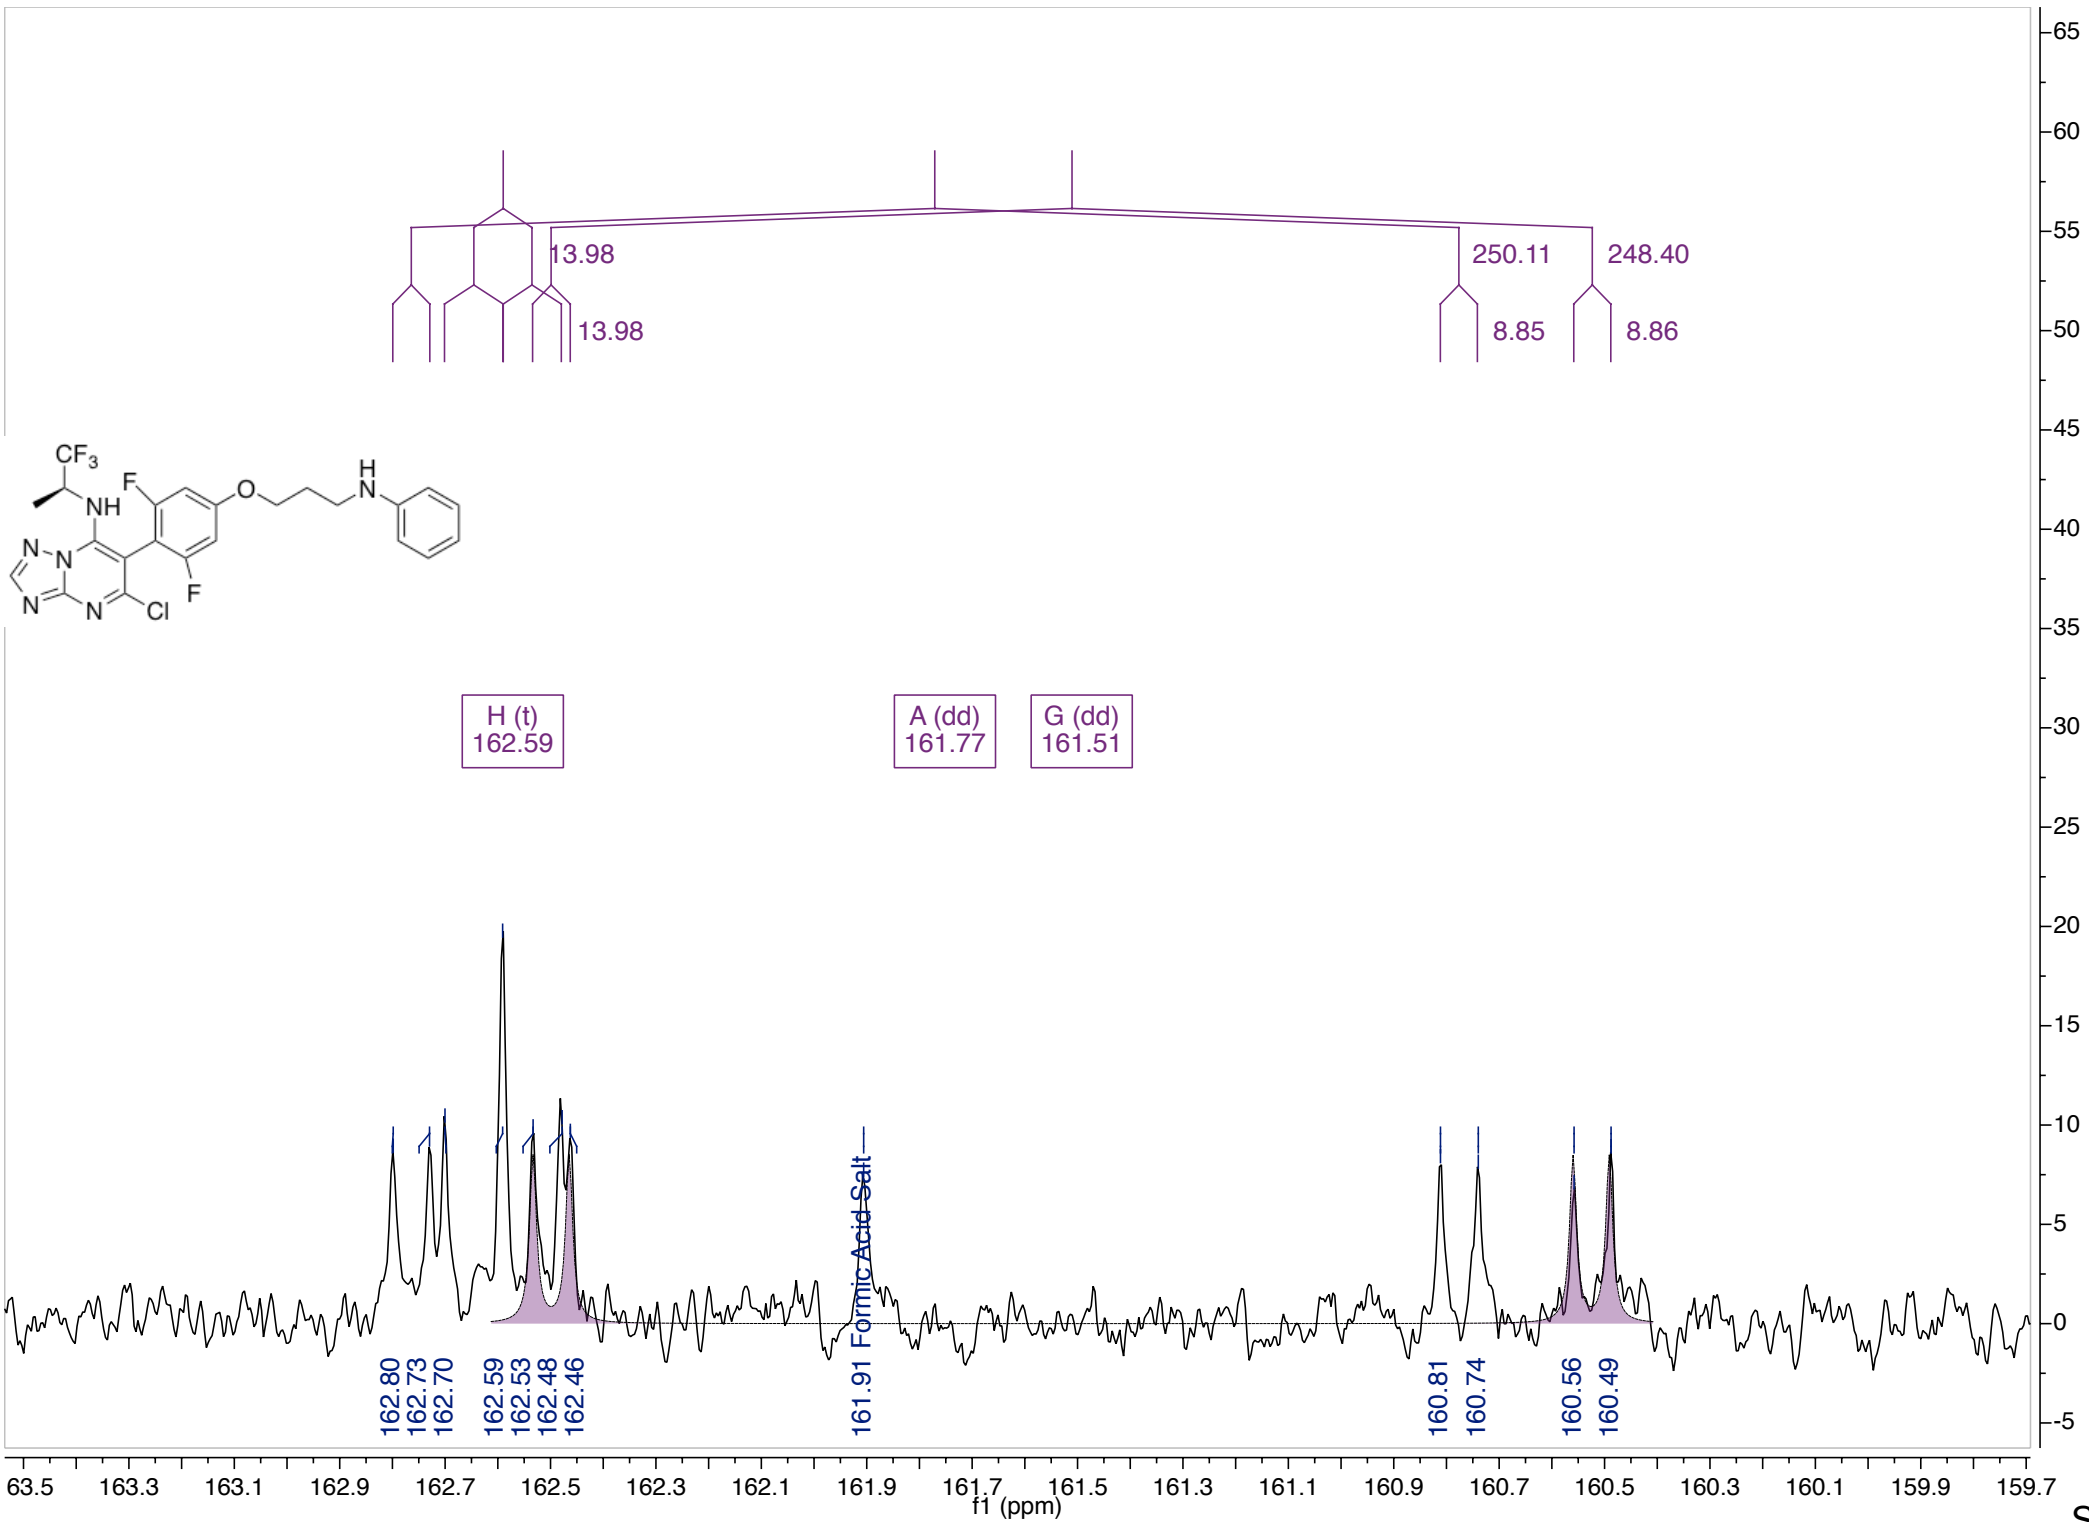

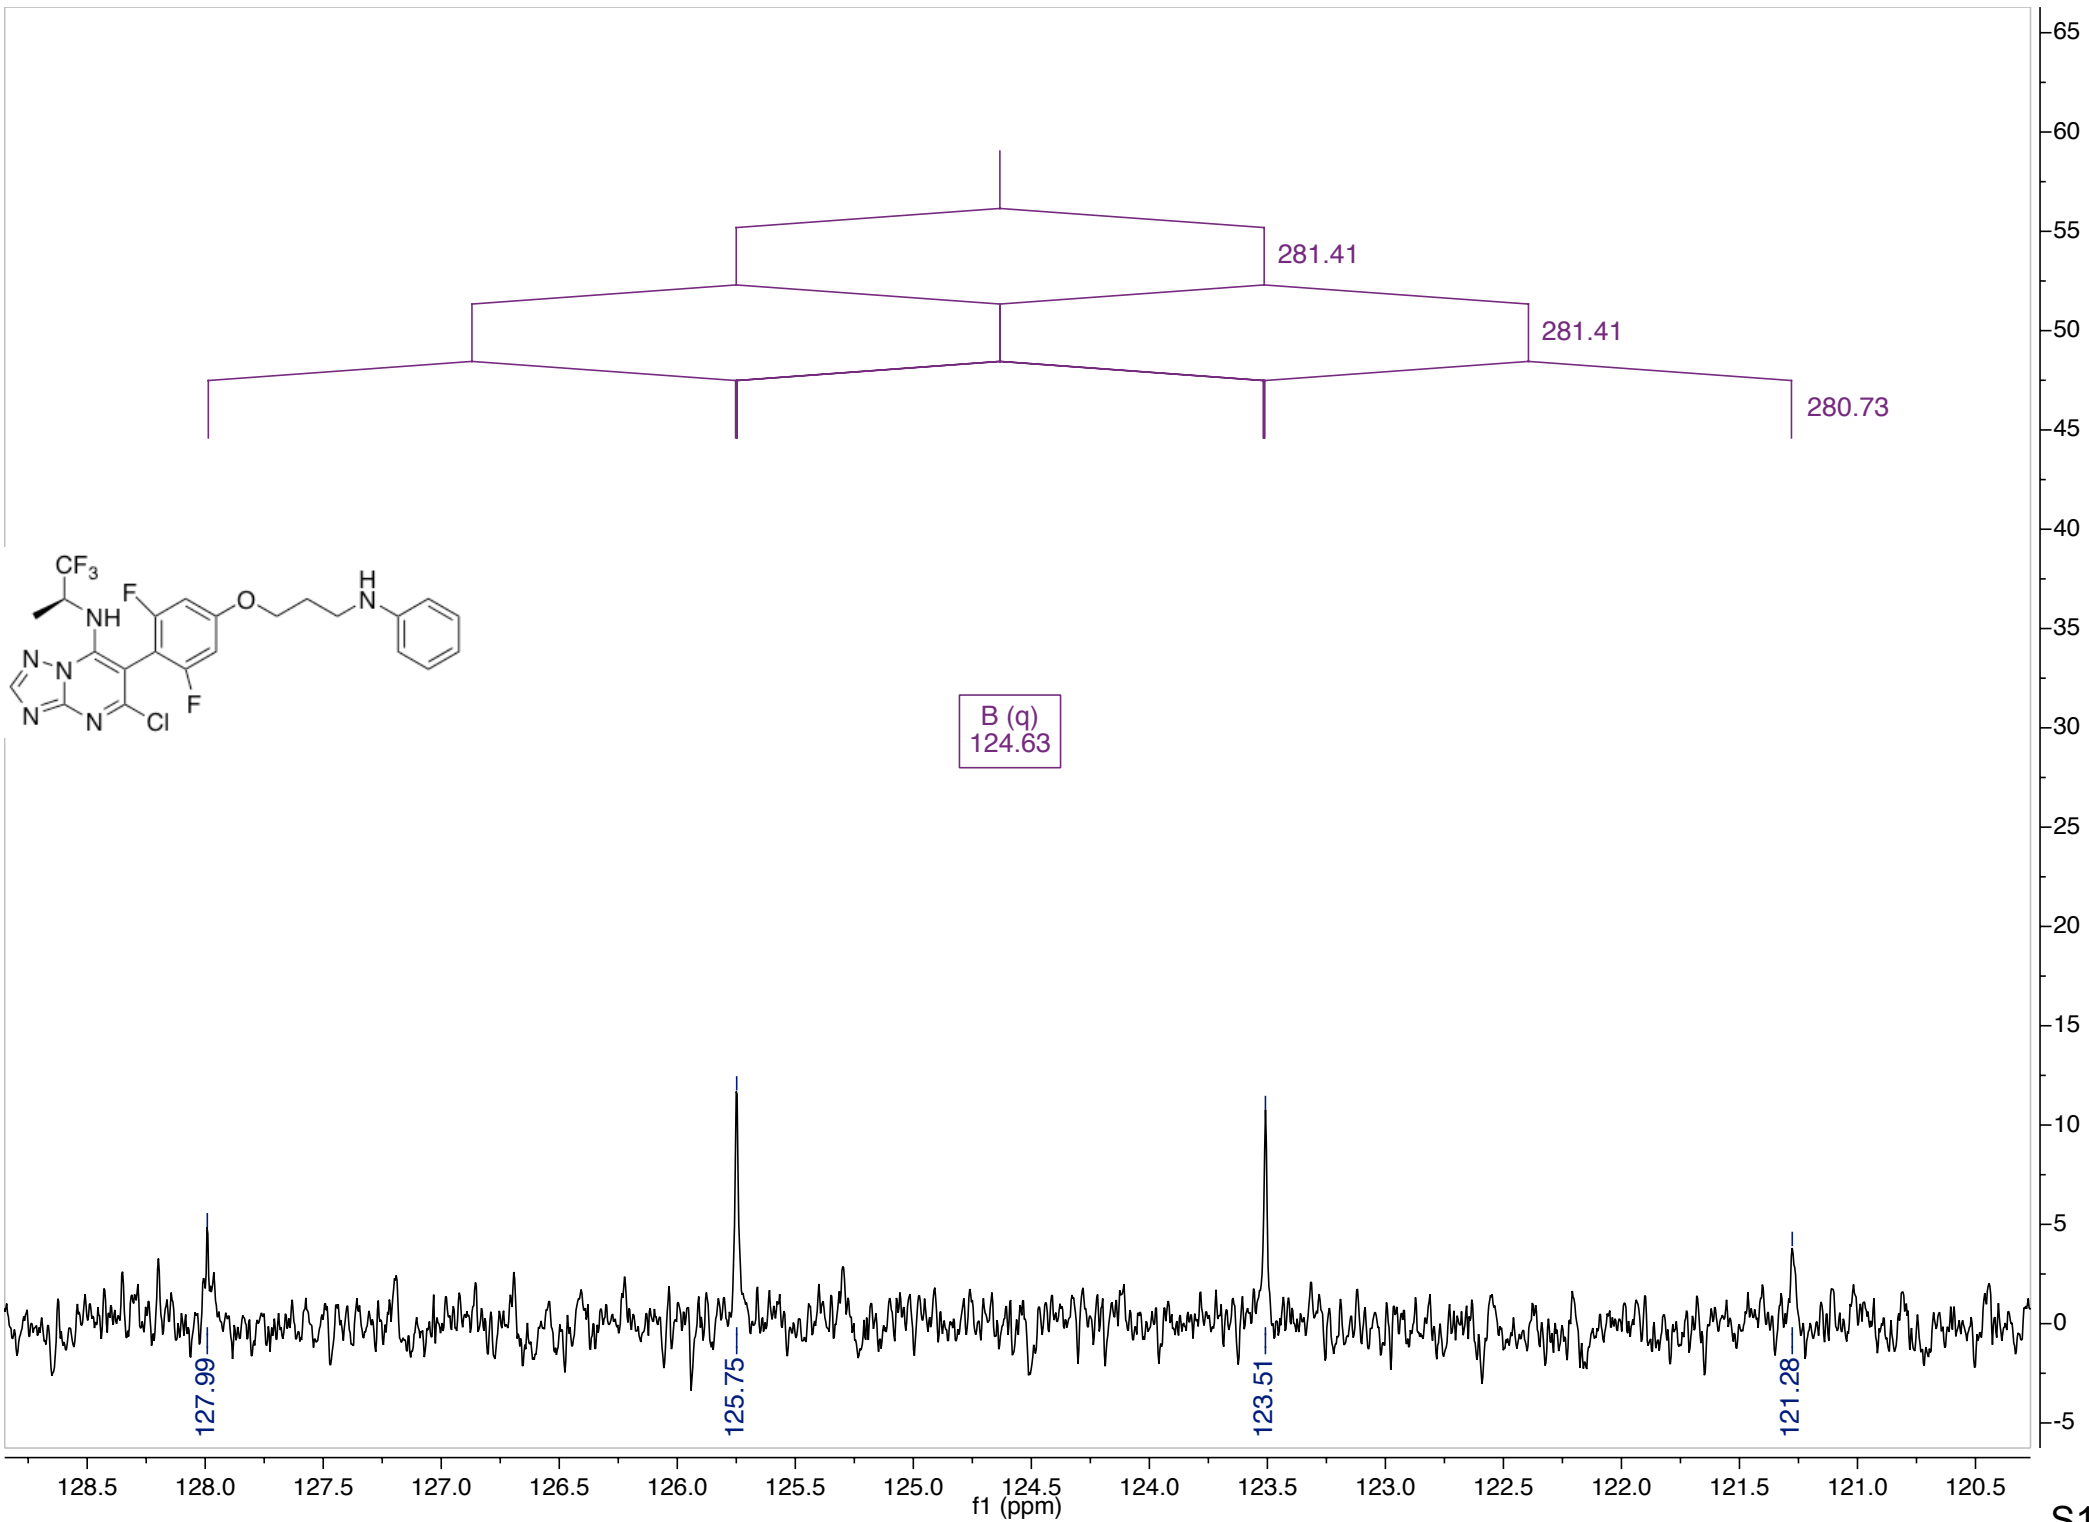

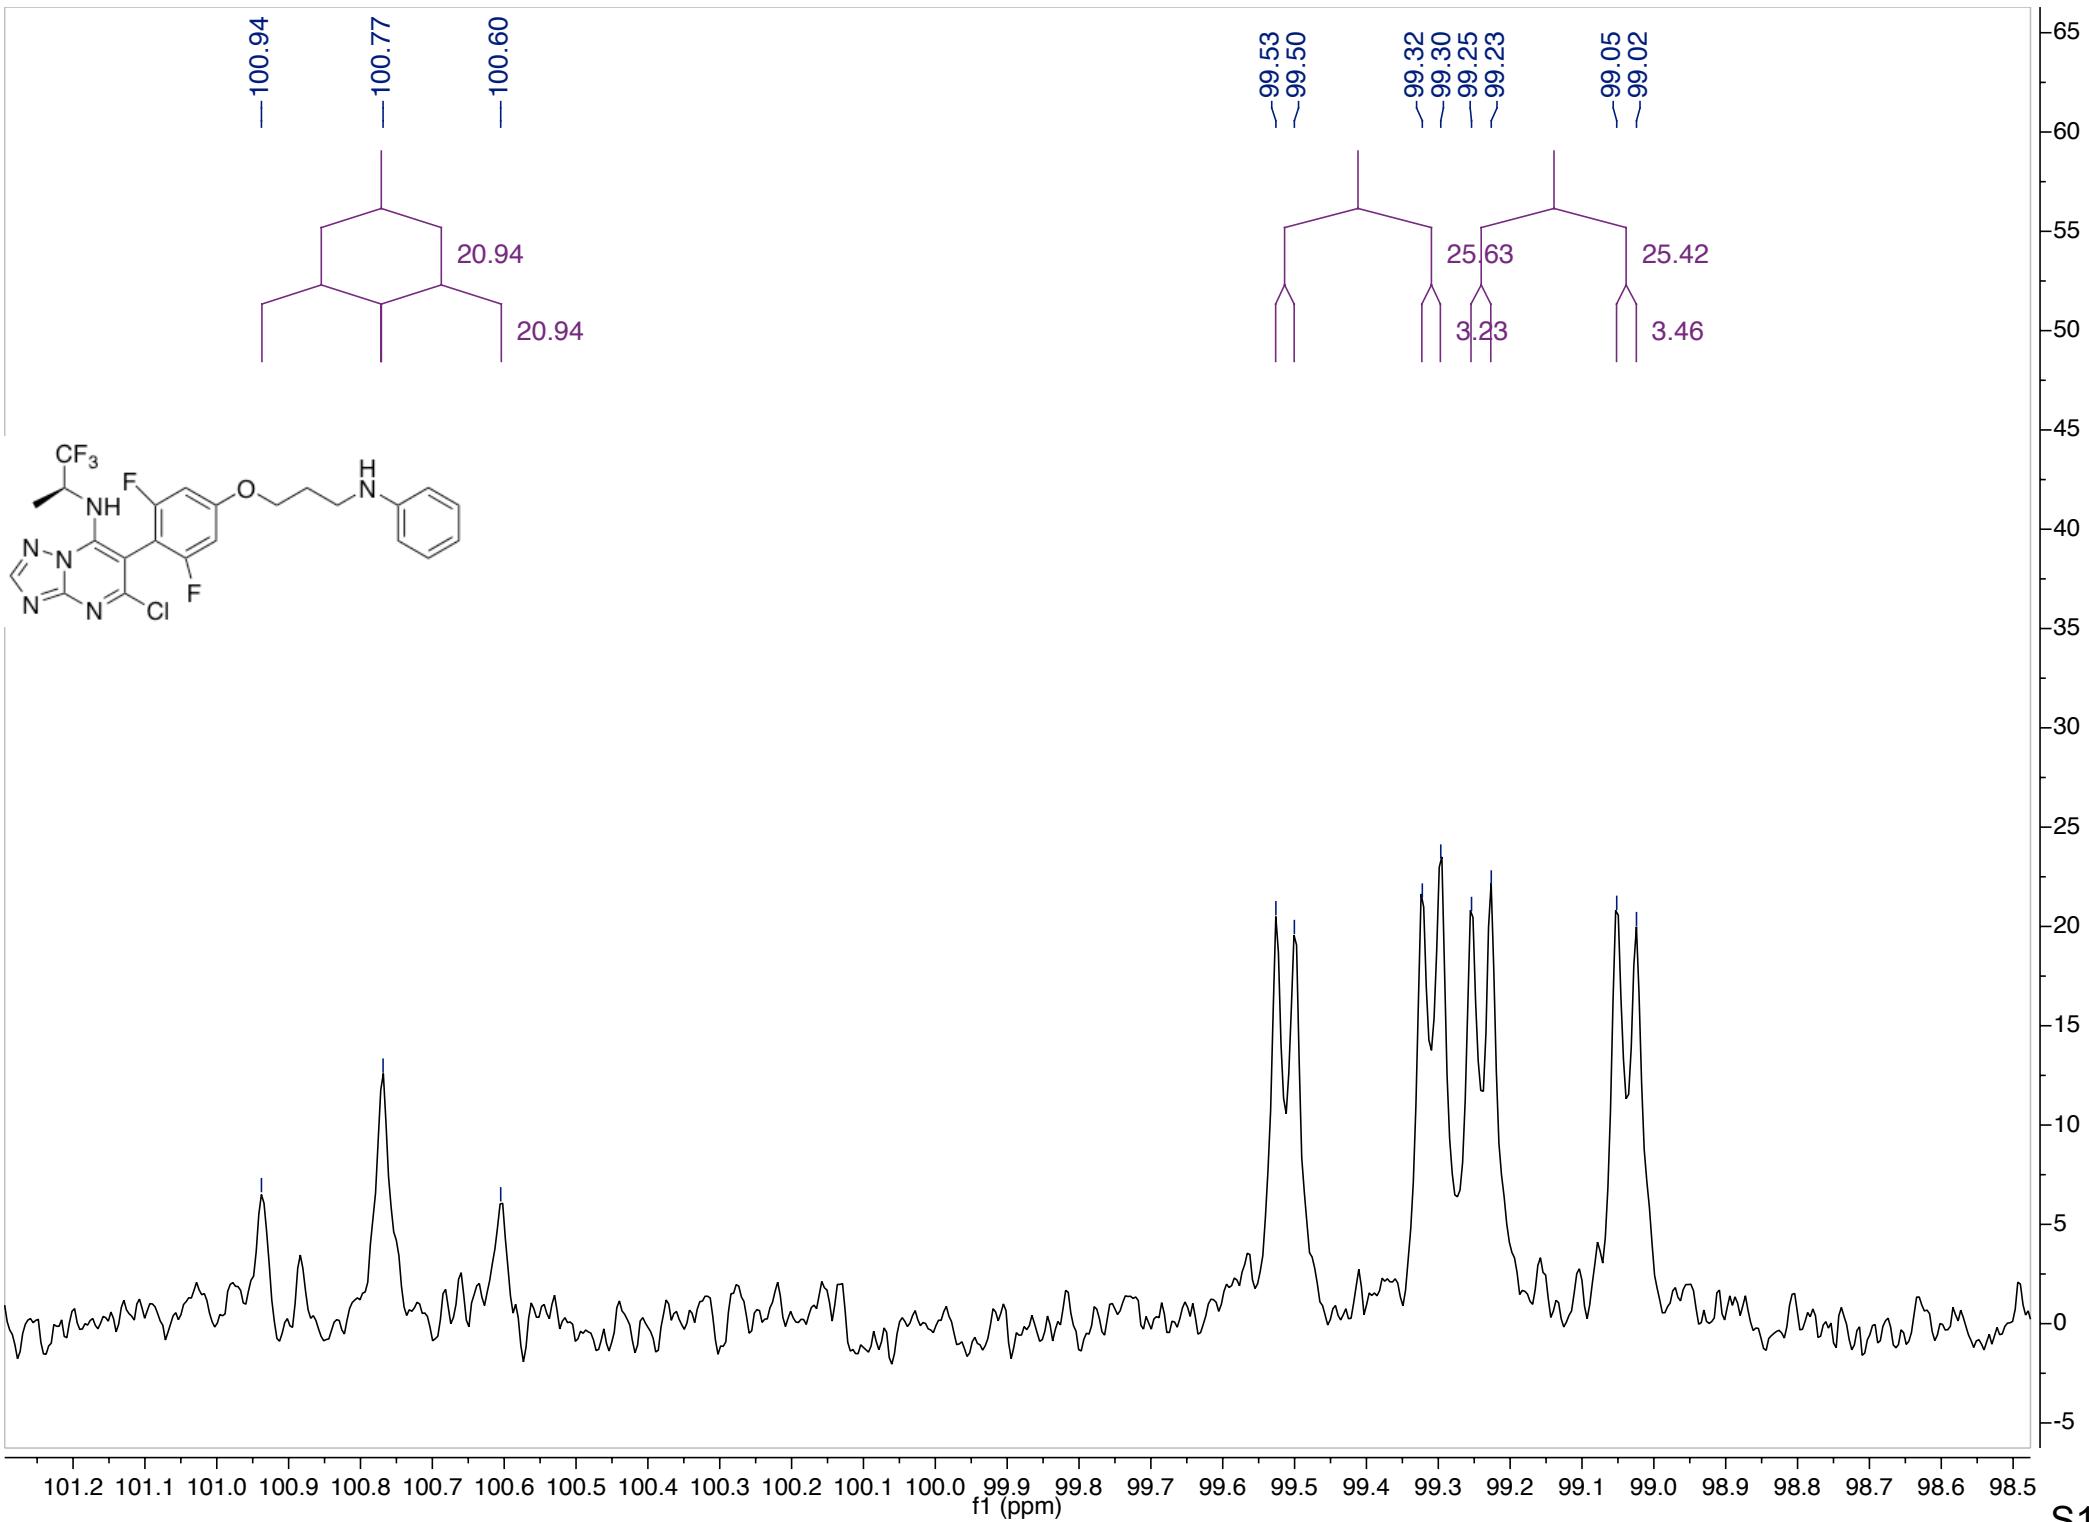

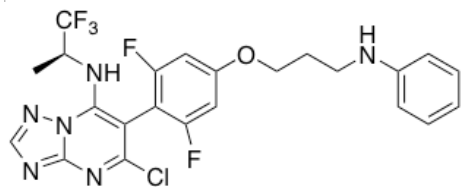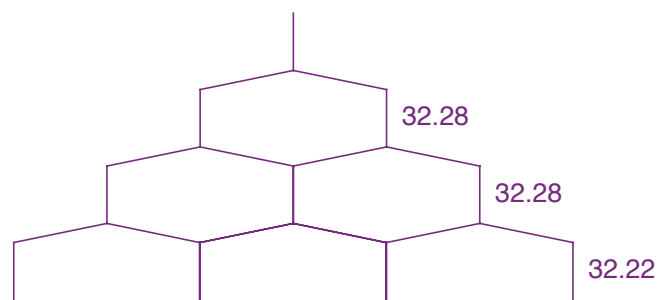

F (q)  
50.79

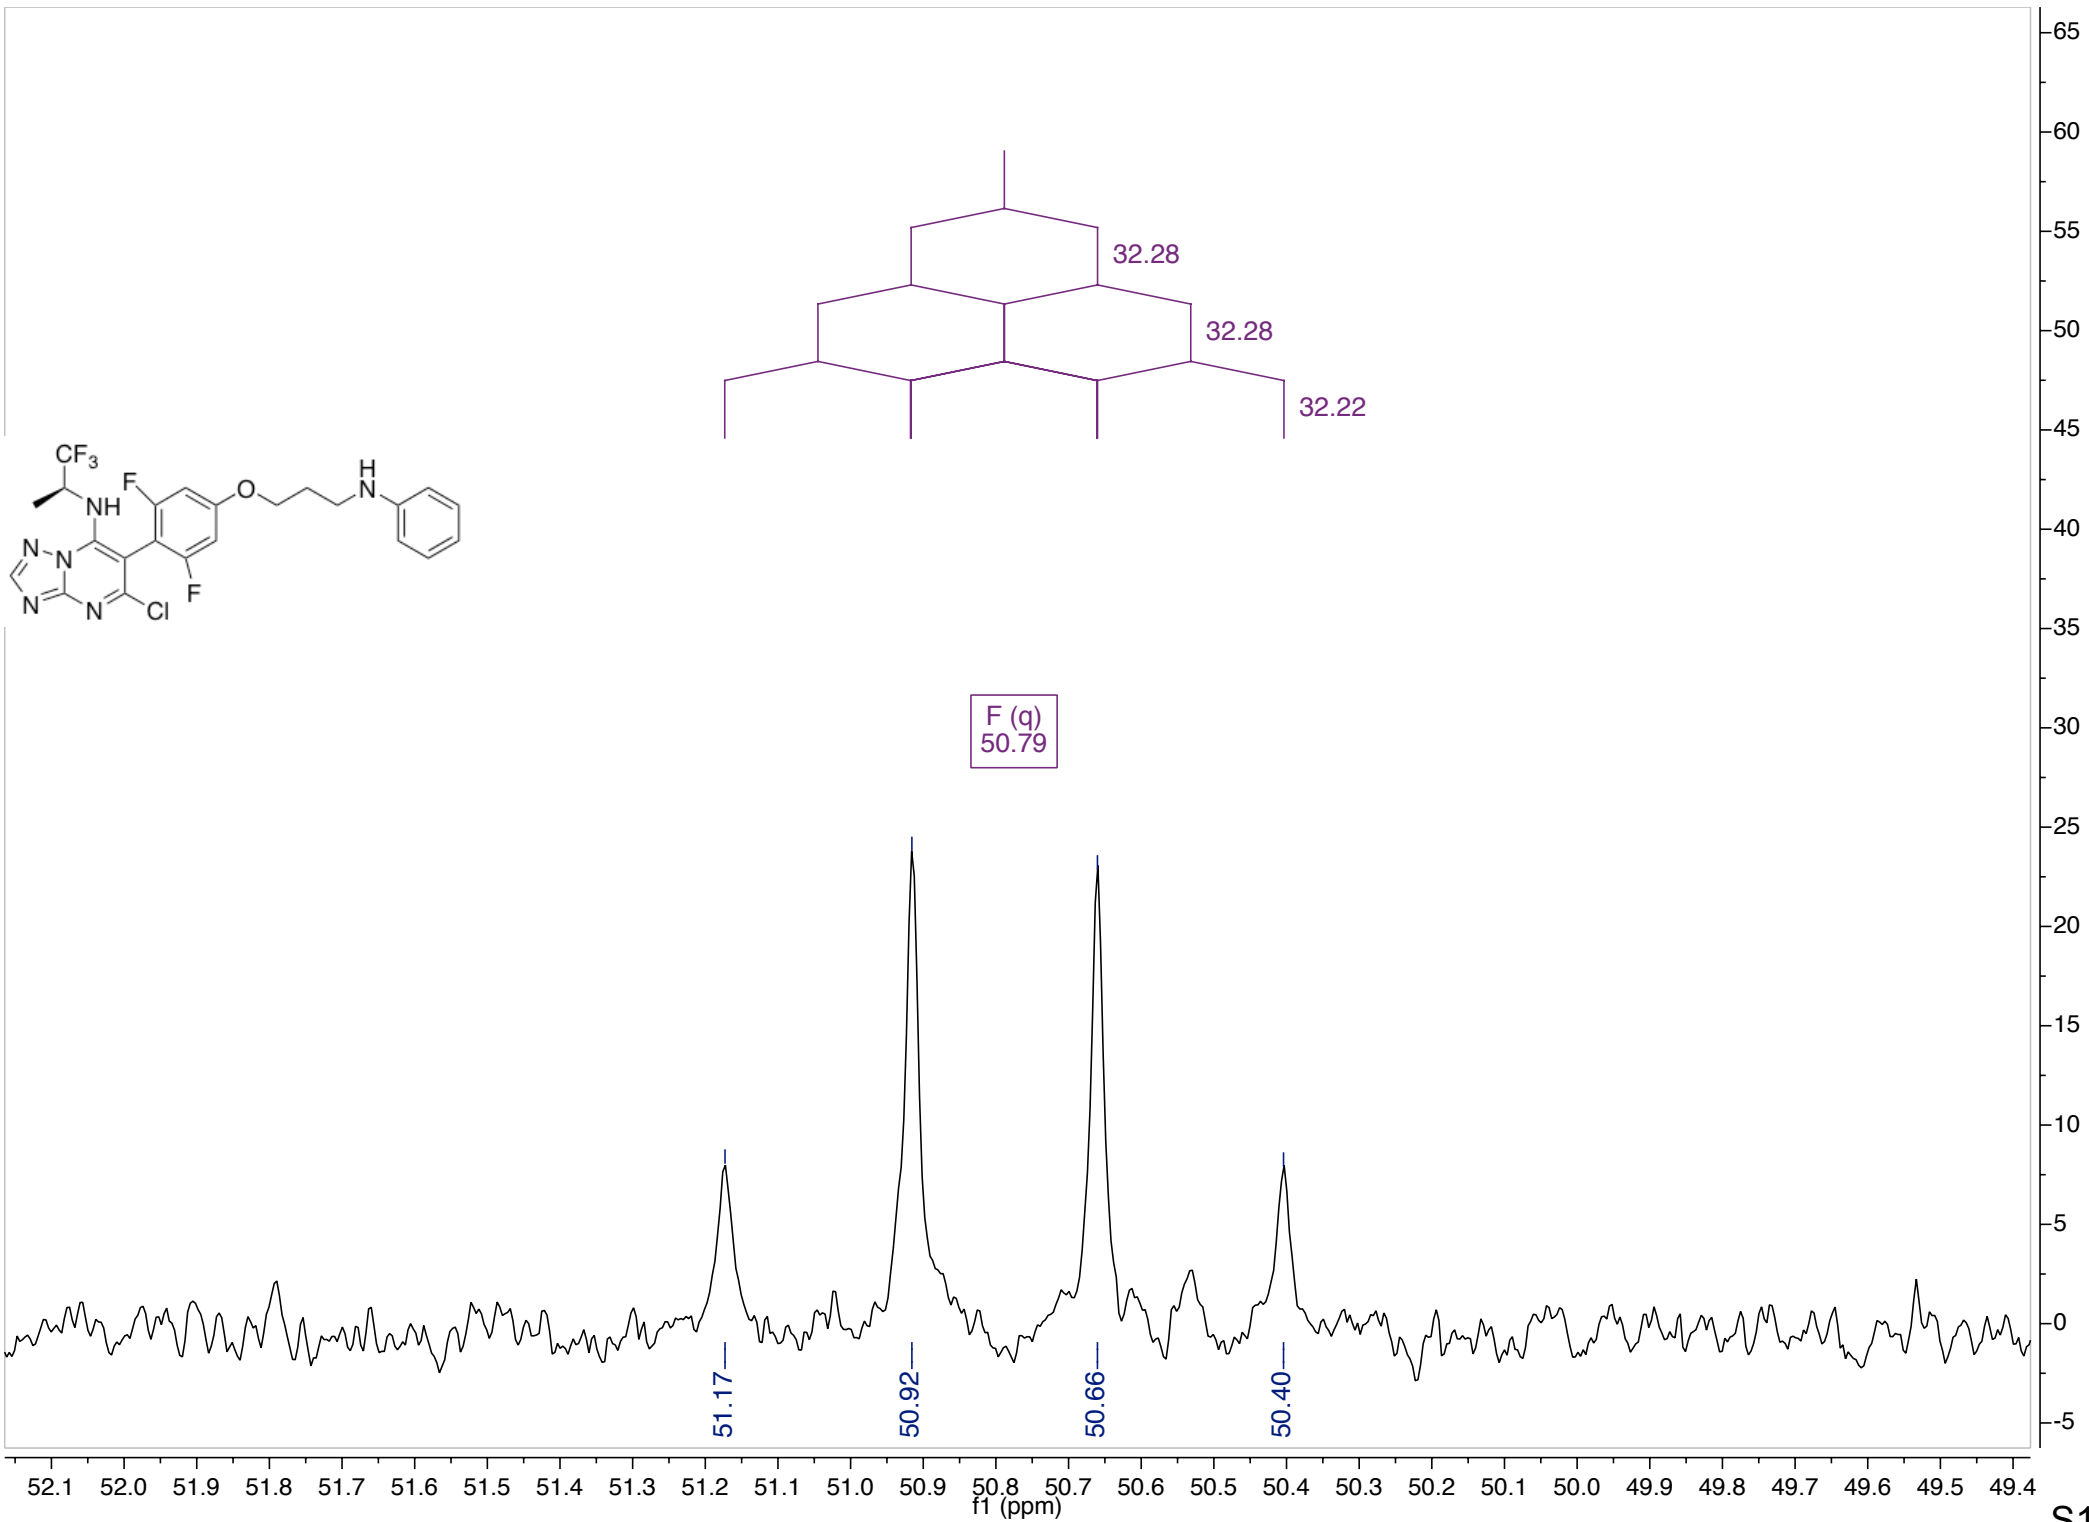

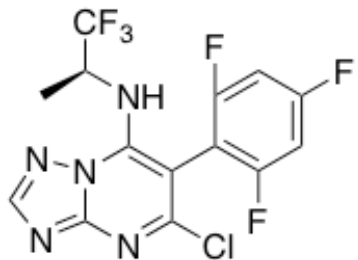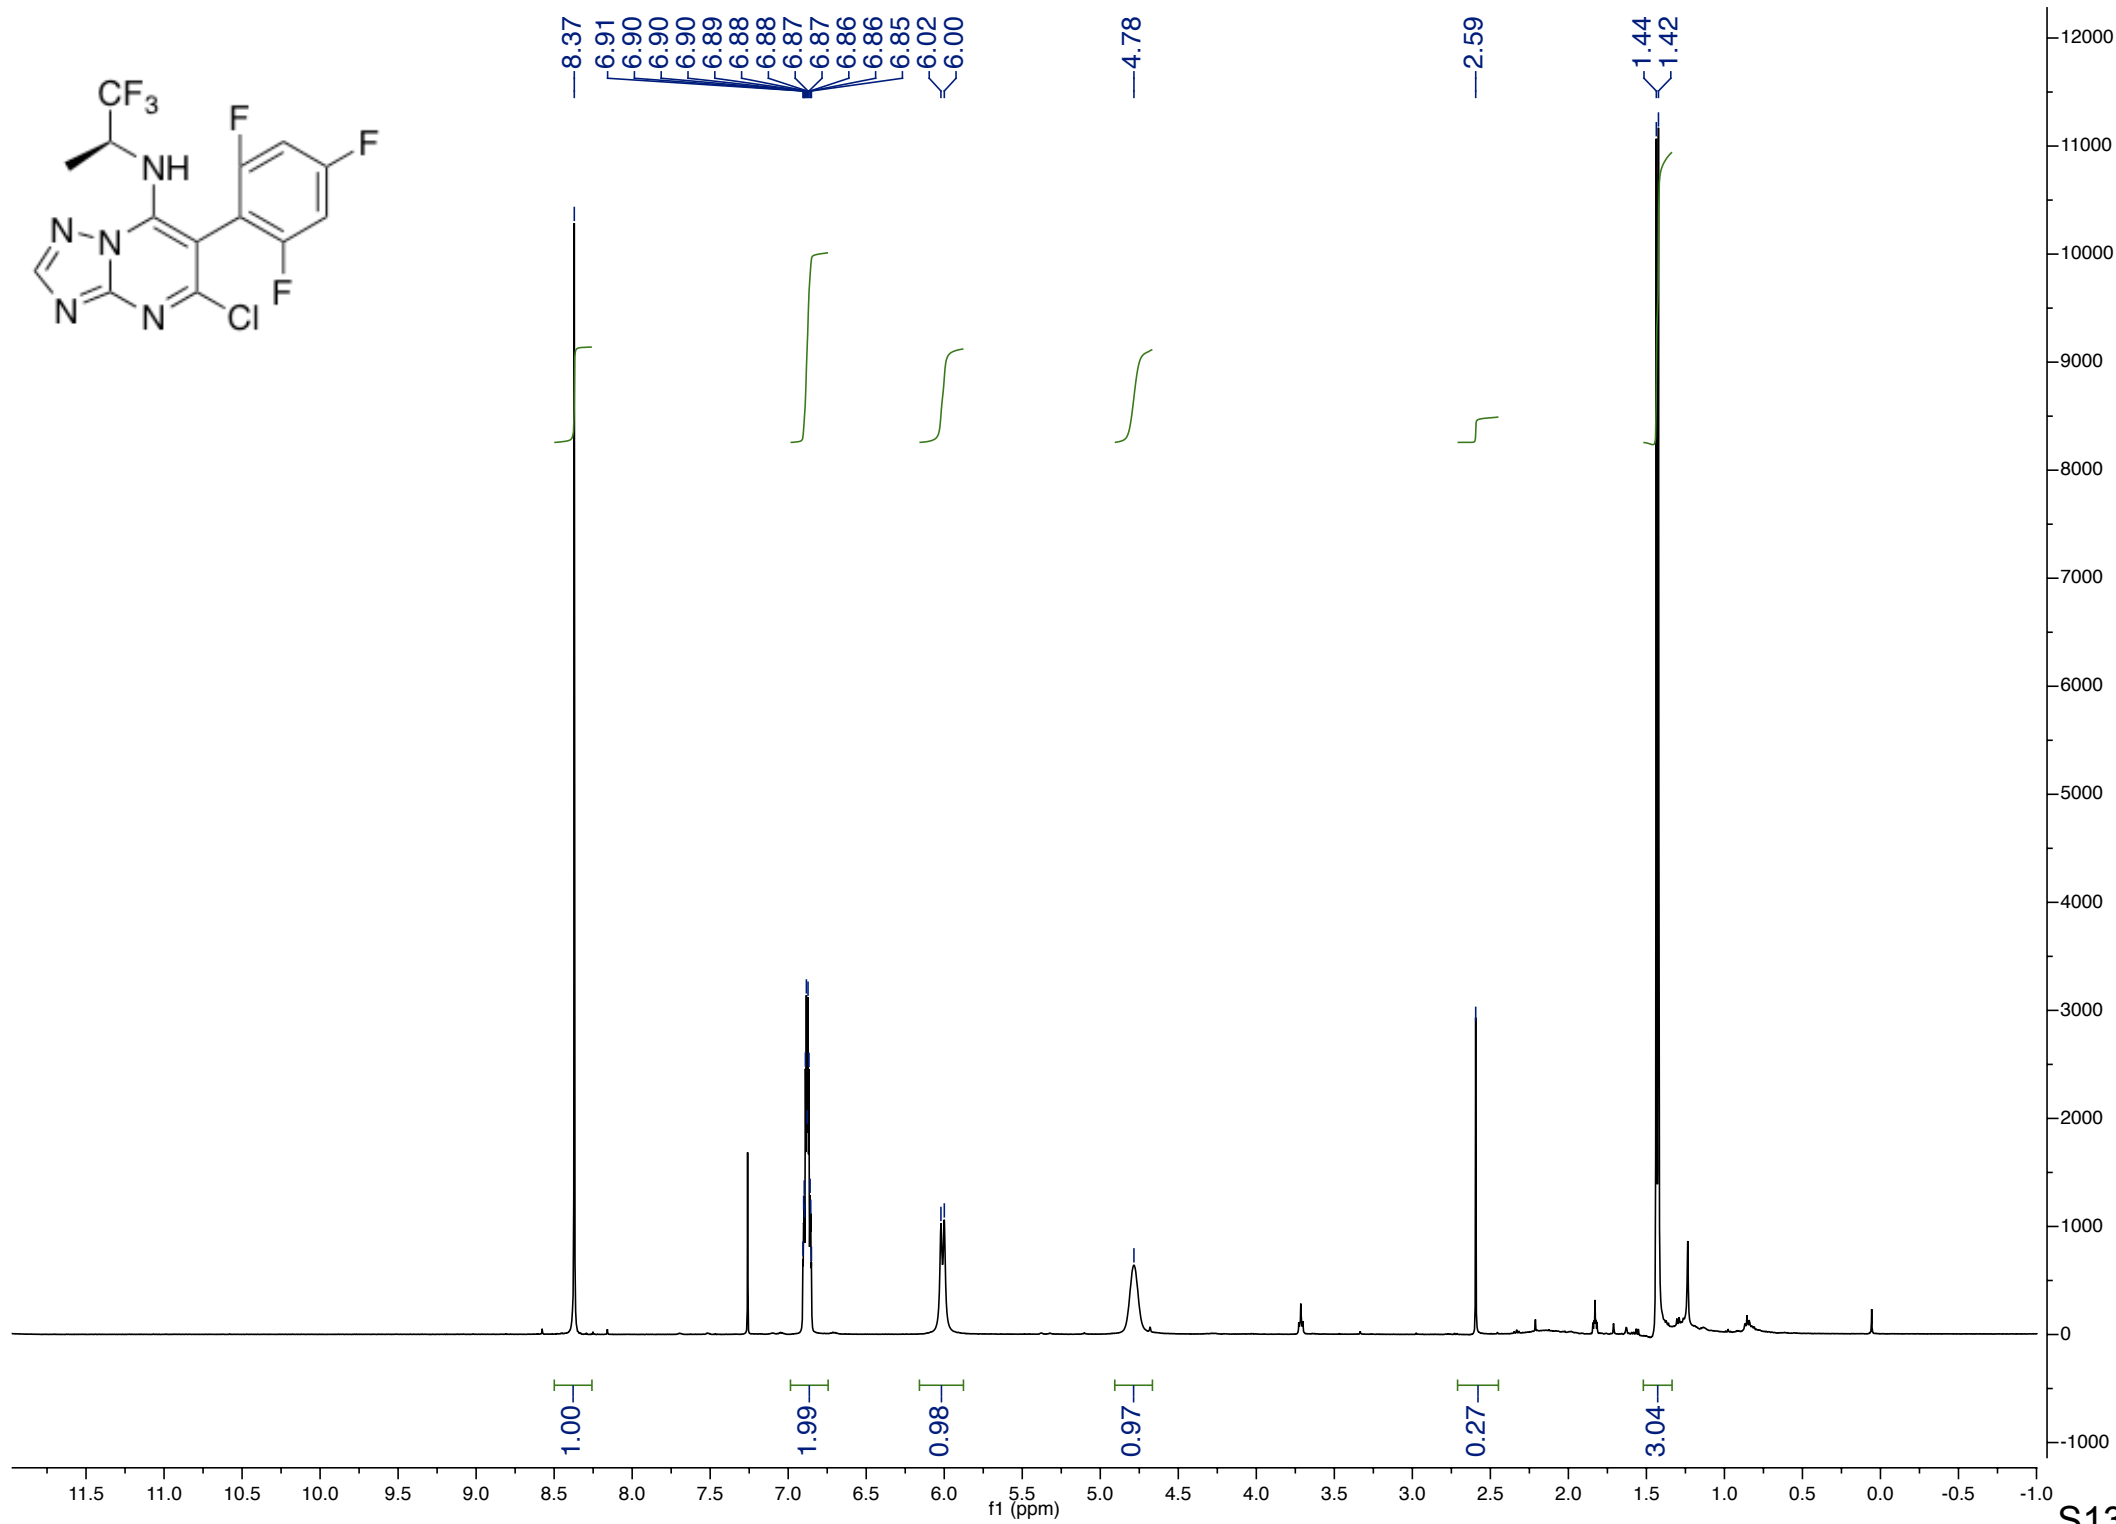

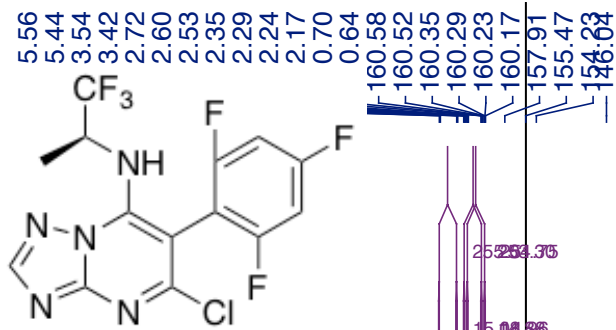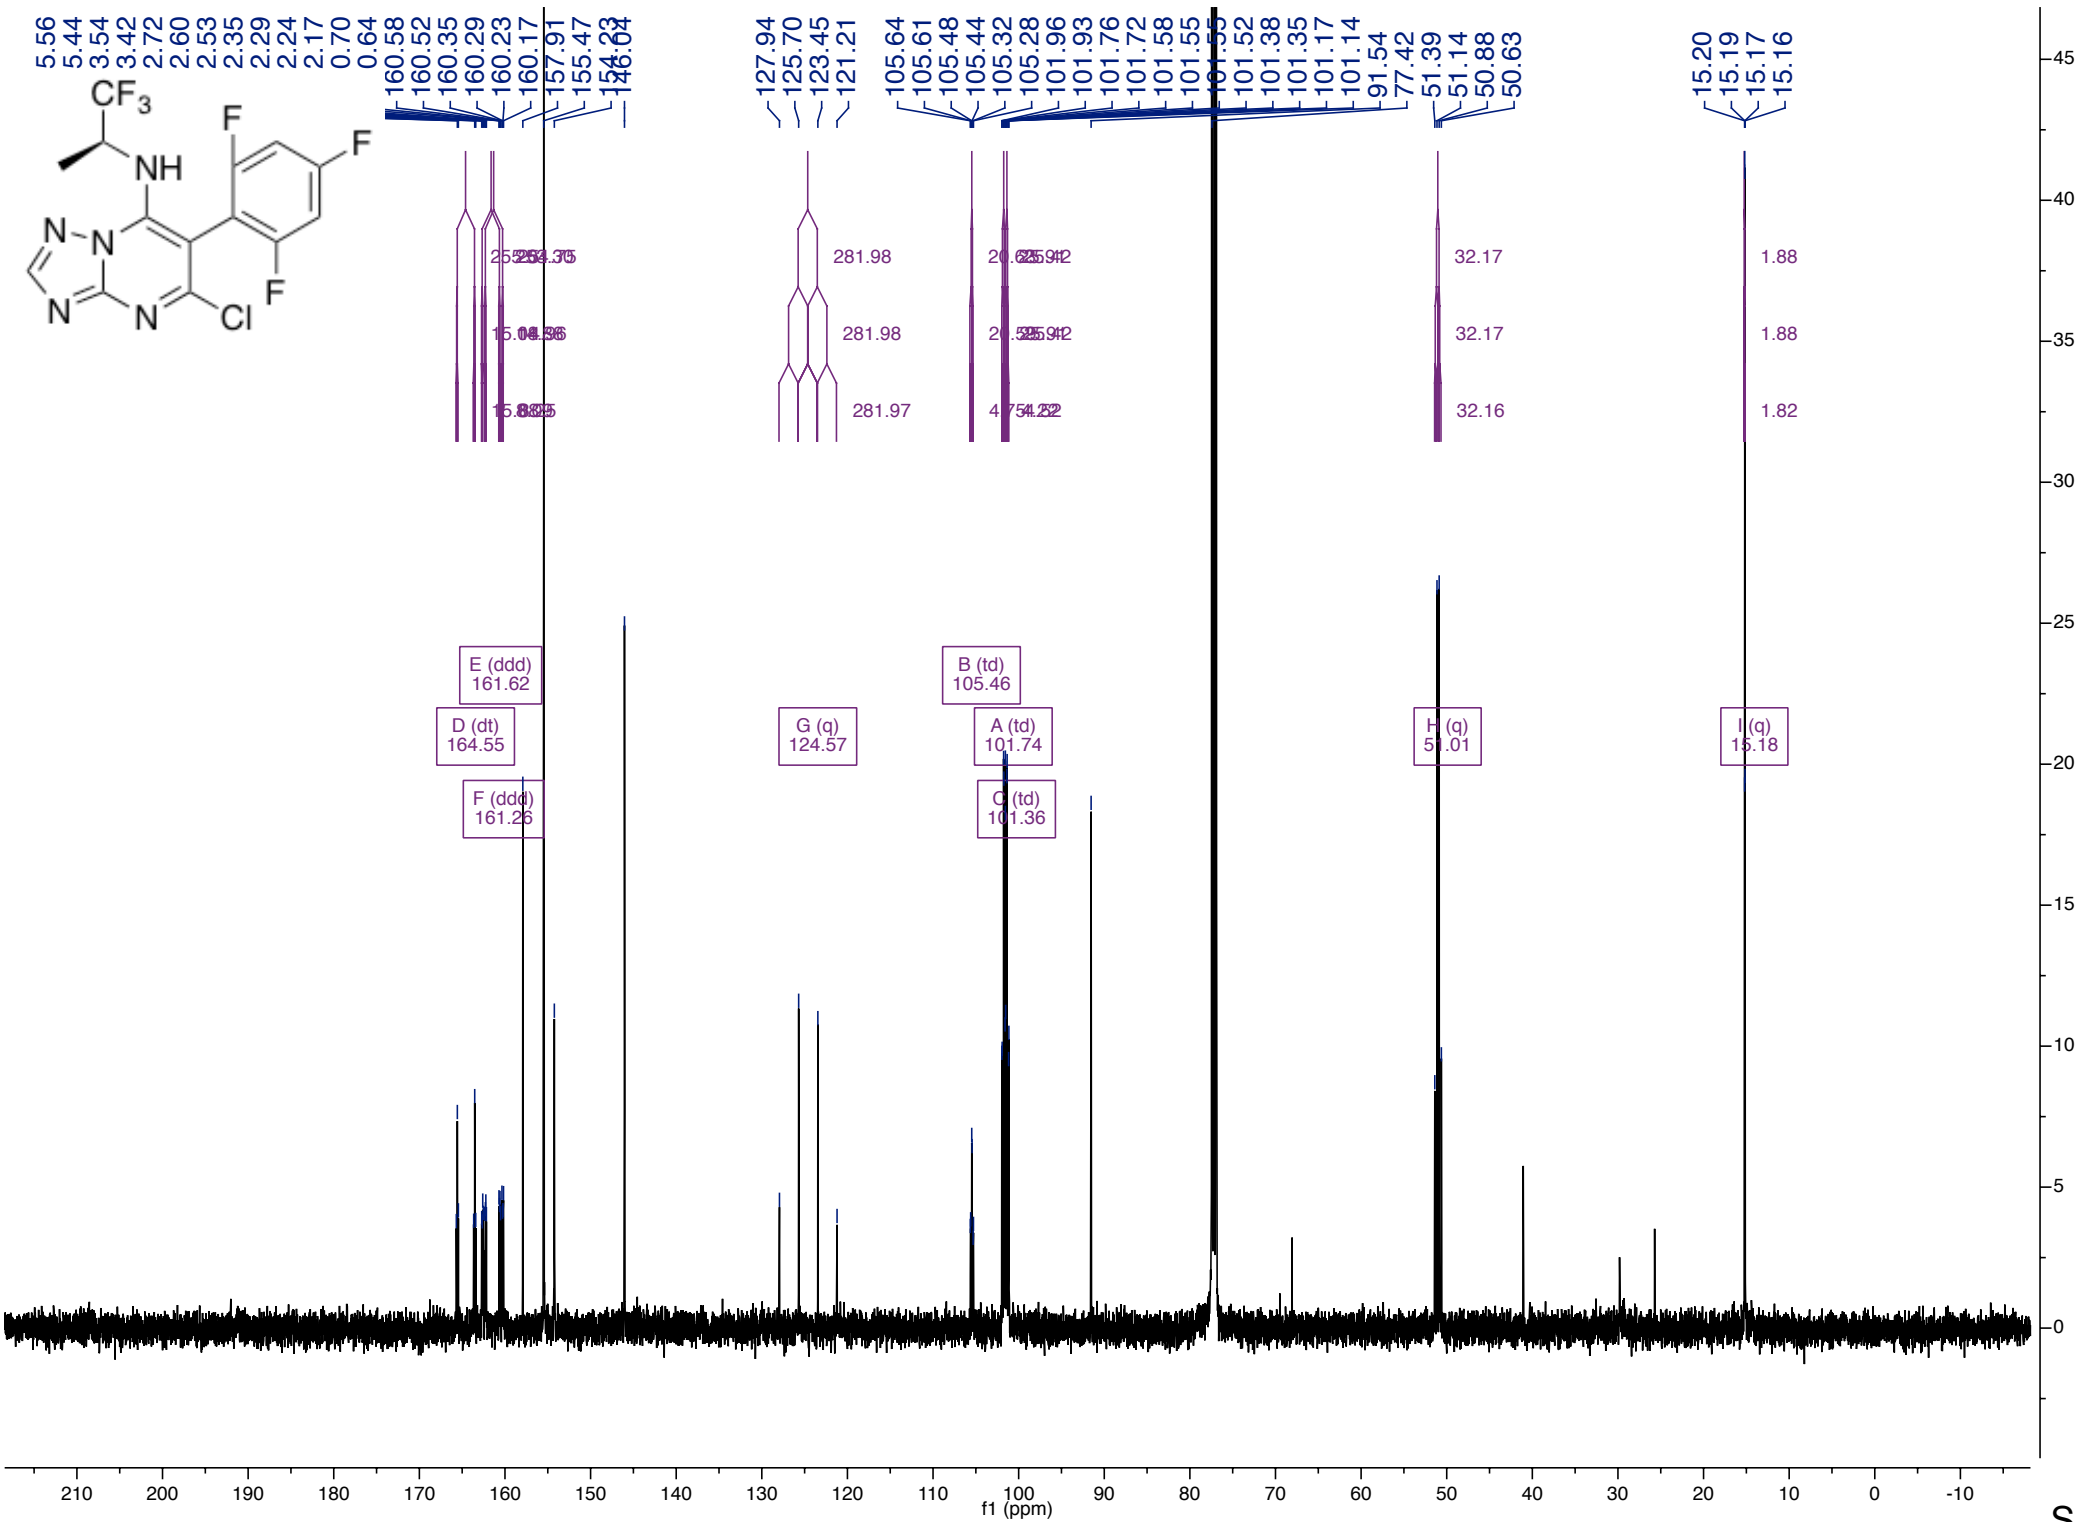

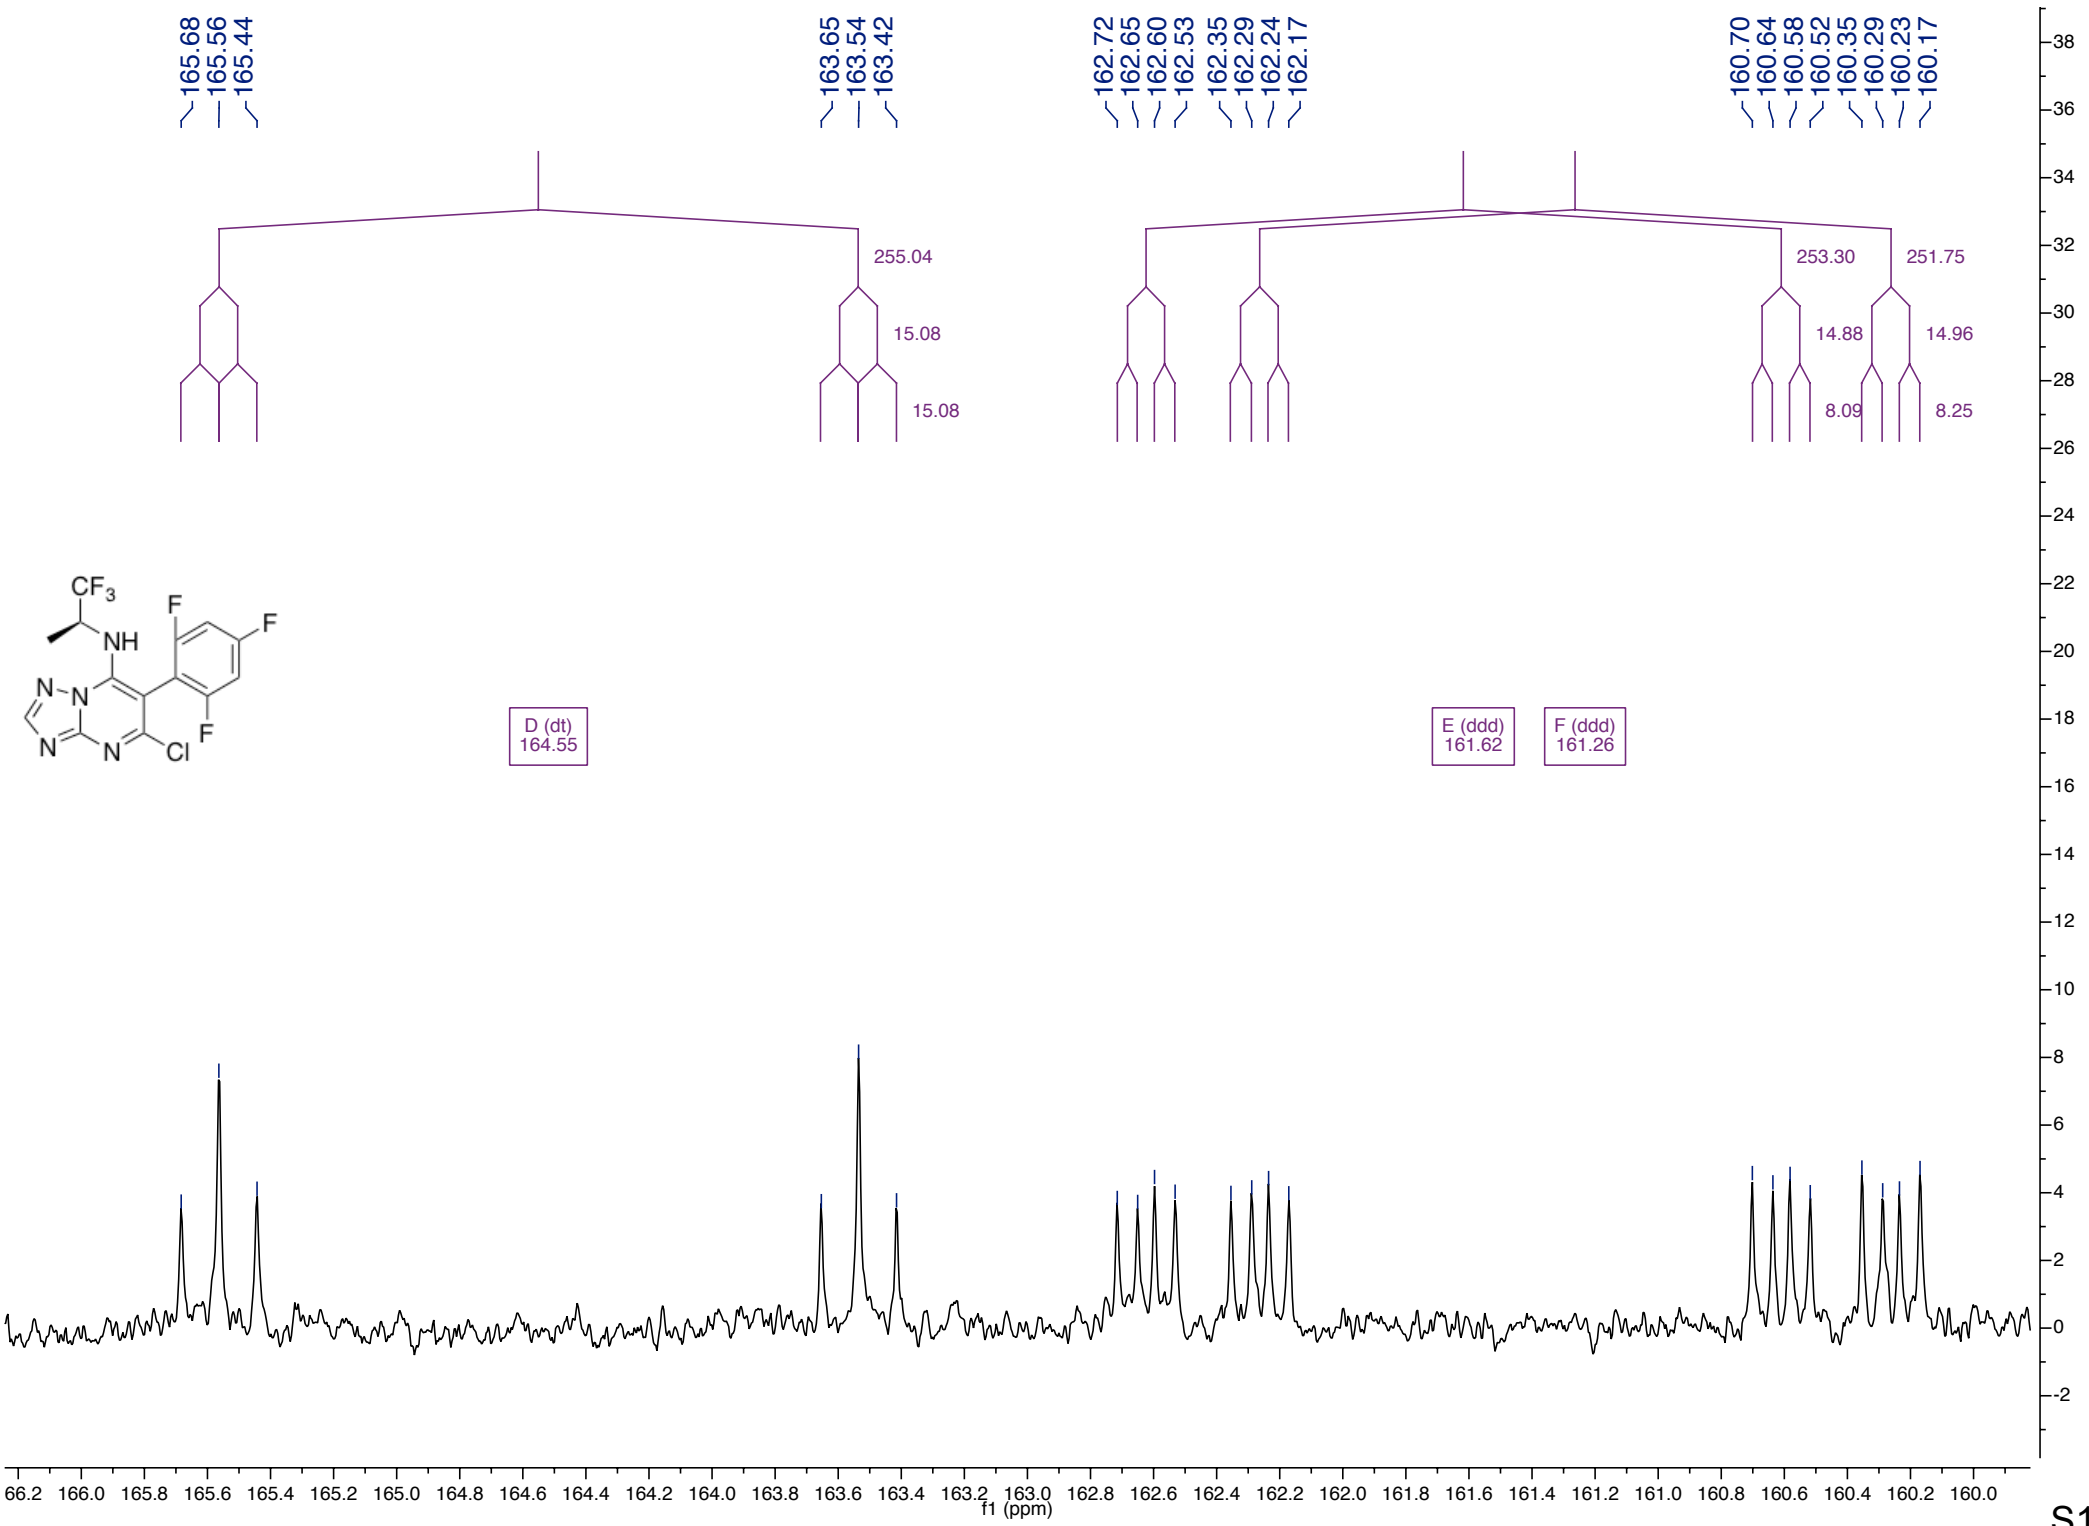

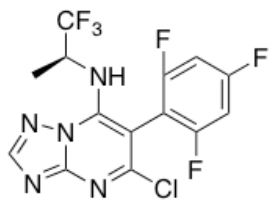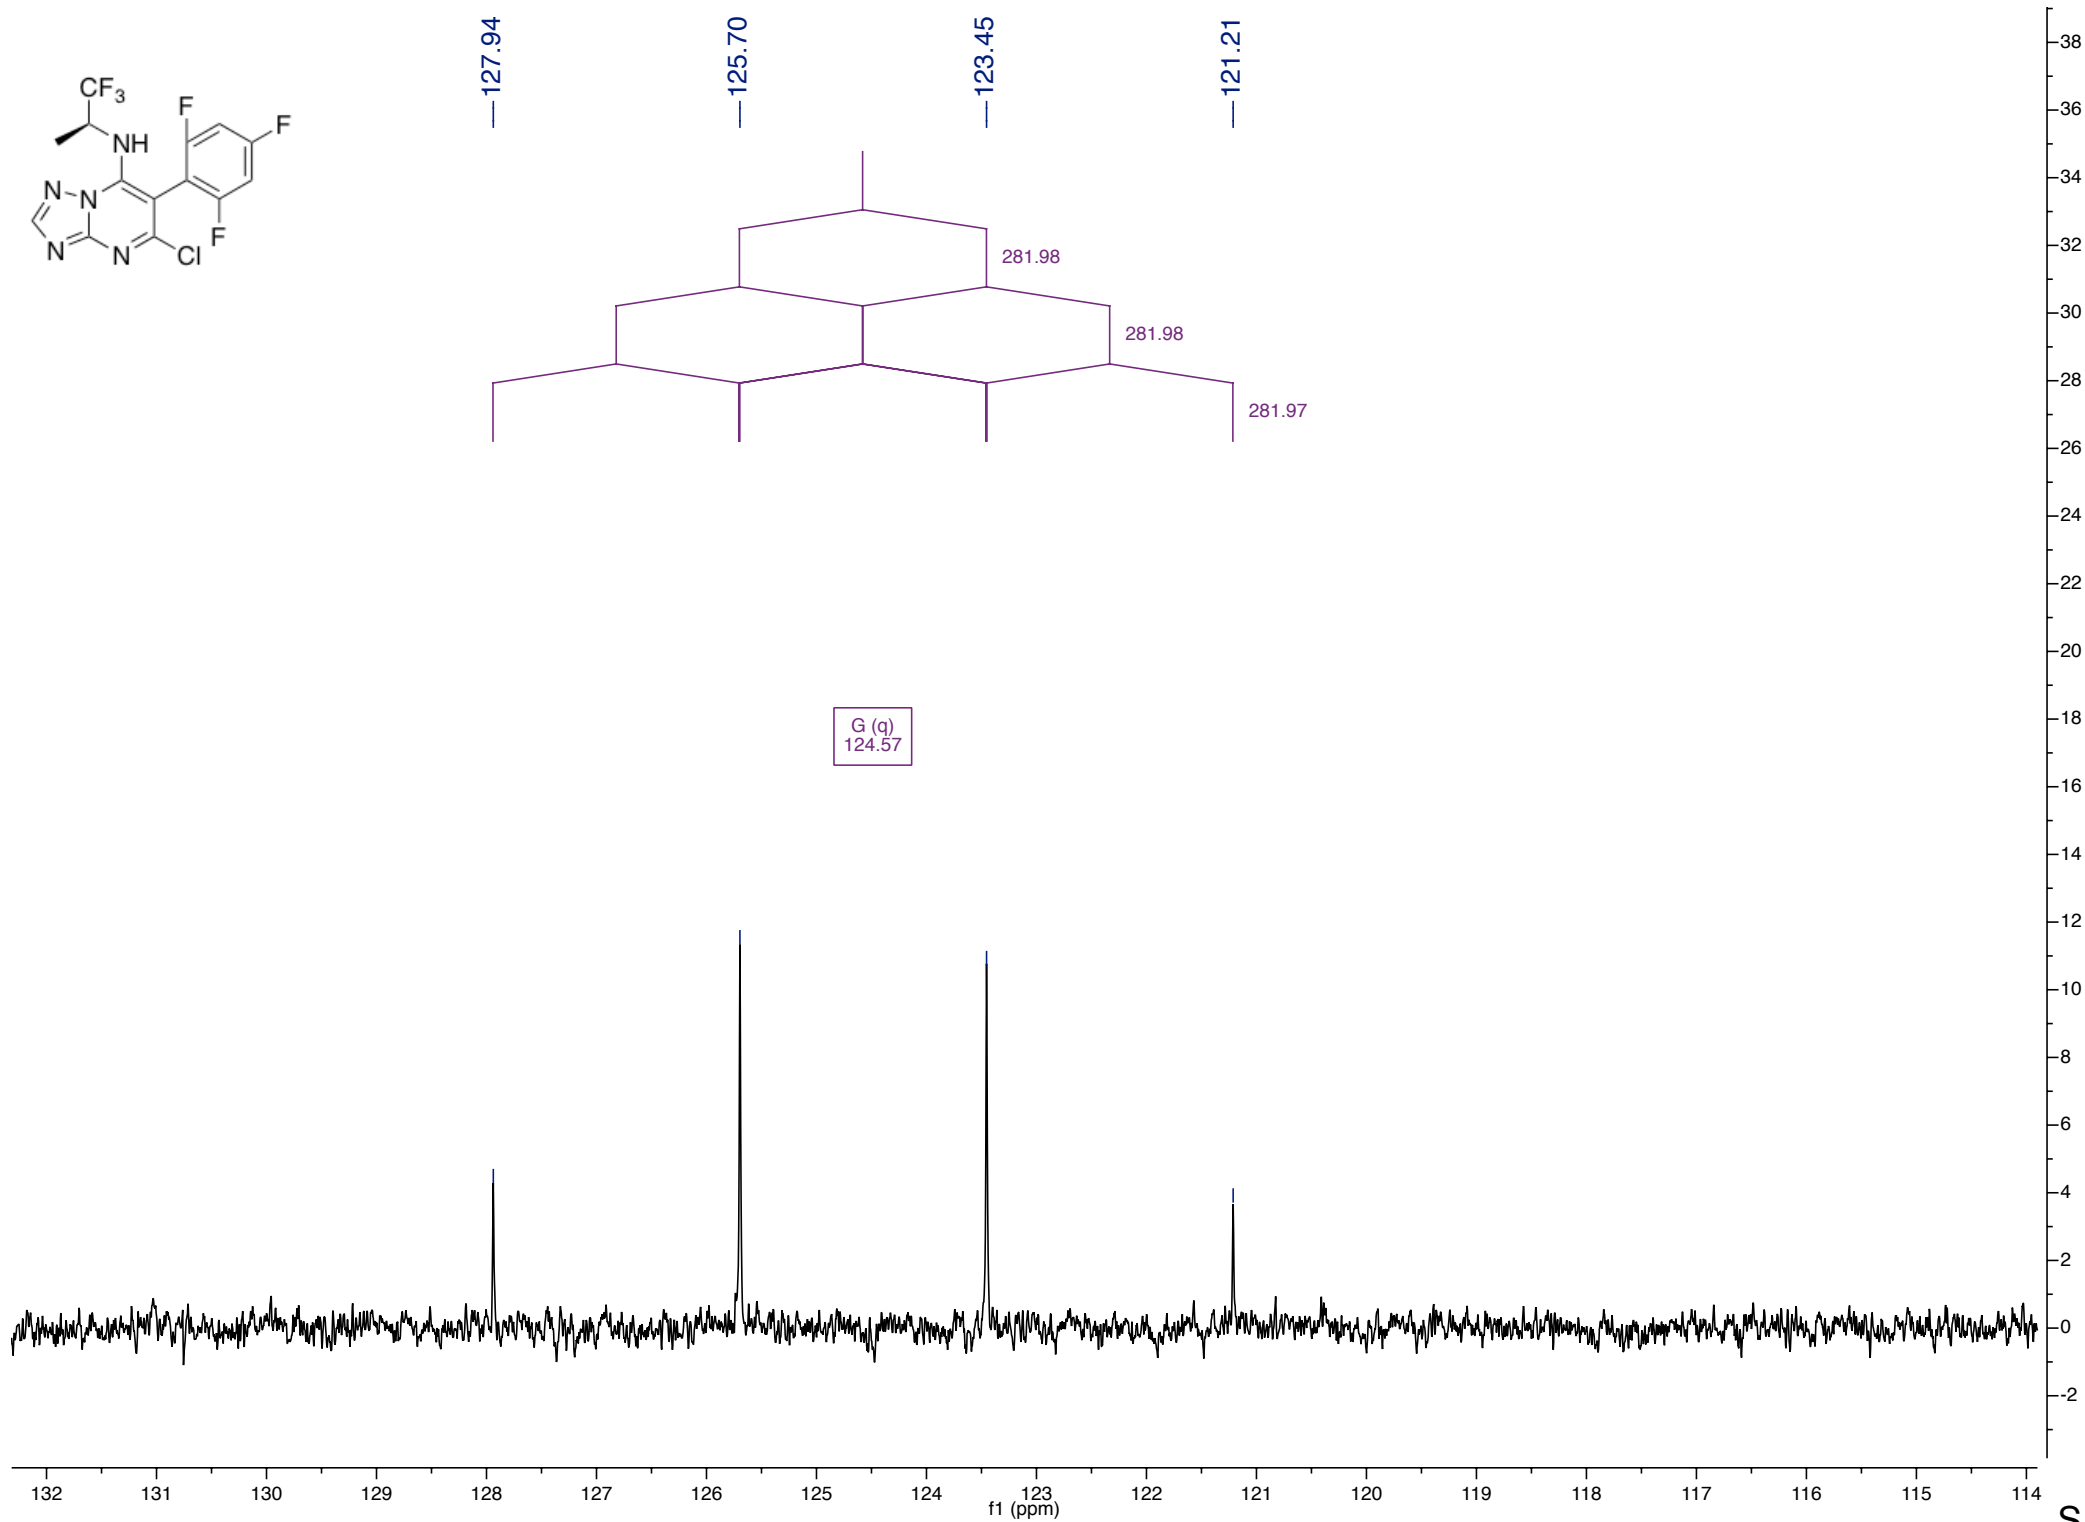



105.64  
105.61  
105.48  
105.44  
105.32  
105.28

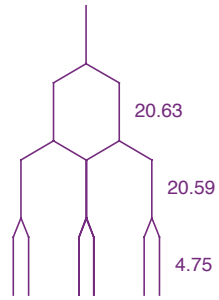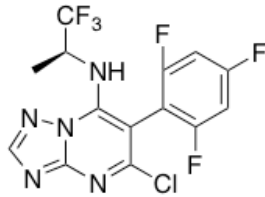

101.96  
101.93  
101.76  
101.72  
101.58  
101.55  
101.55  
101.52  
101.38  
101.35  
101.17  
101.14

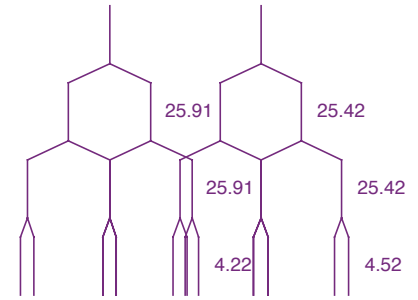

B (td)  
105.46

A (td)  
101.74

C (td)  
101.36

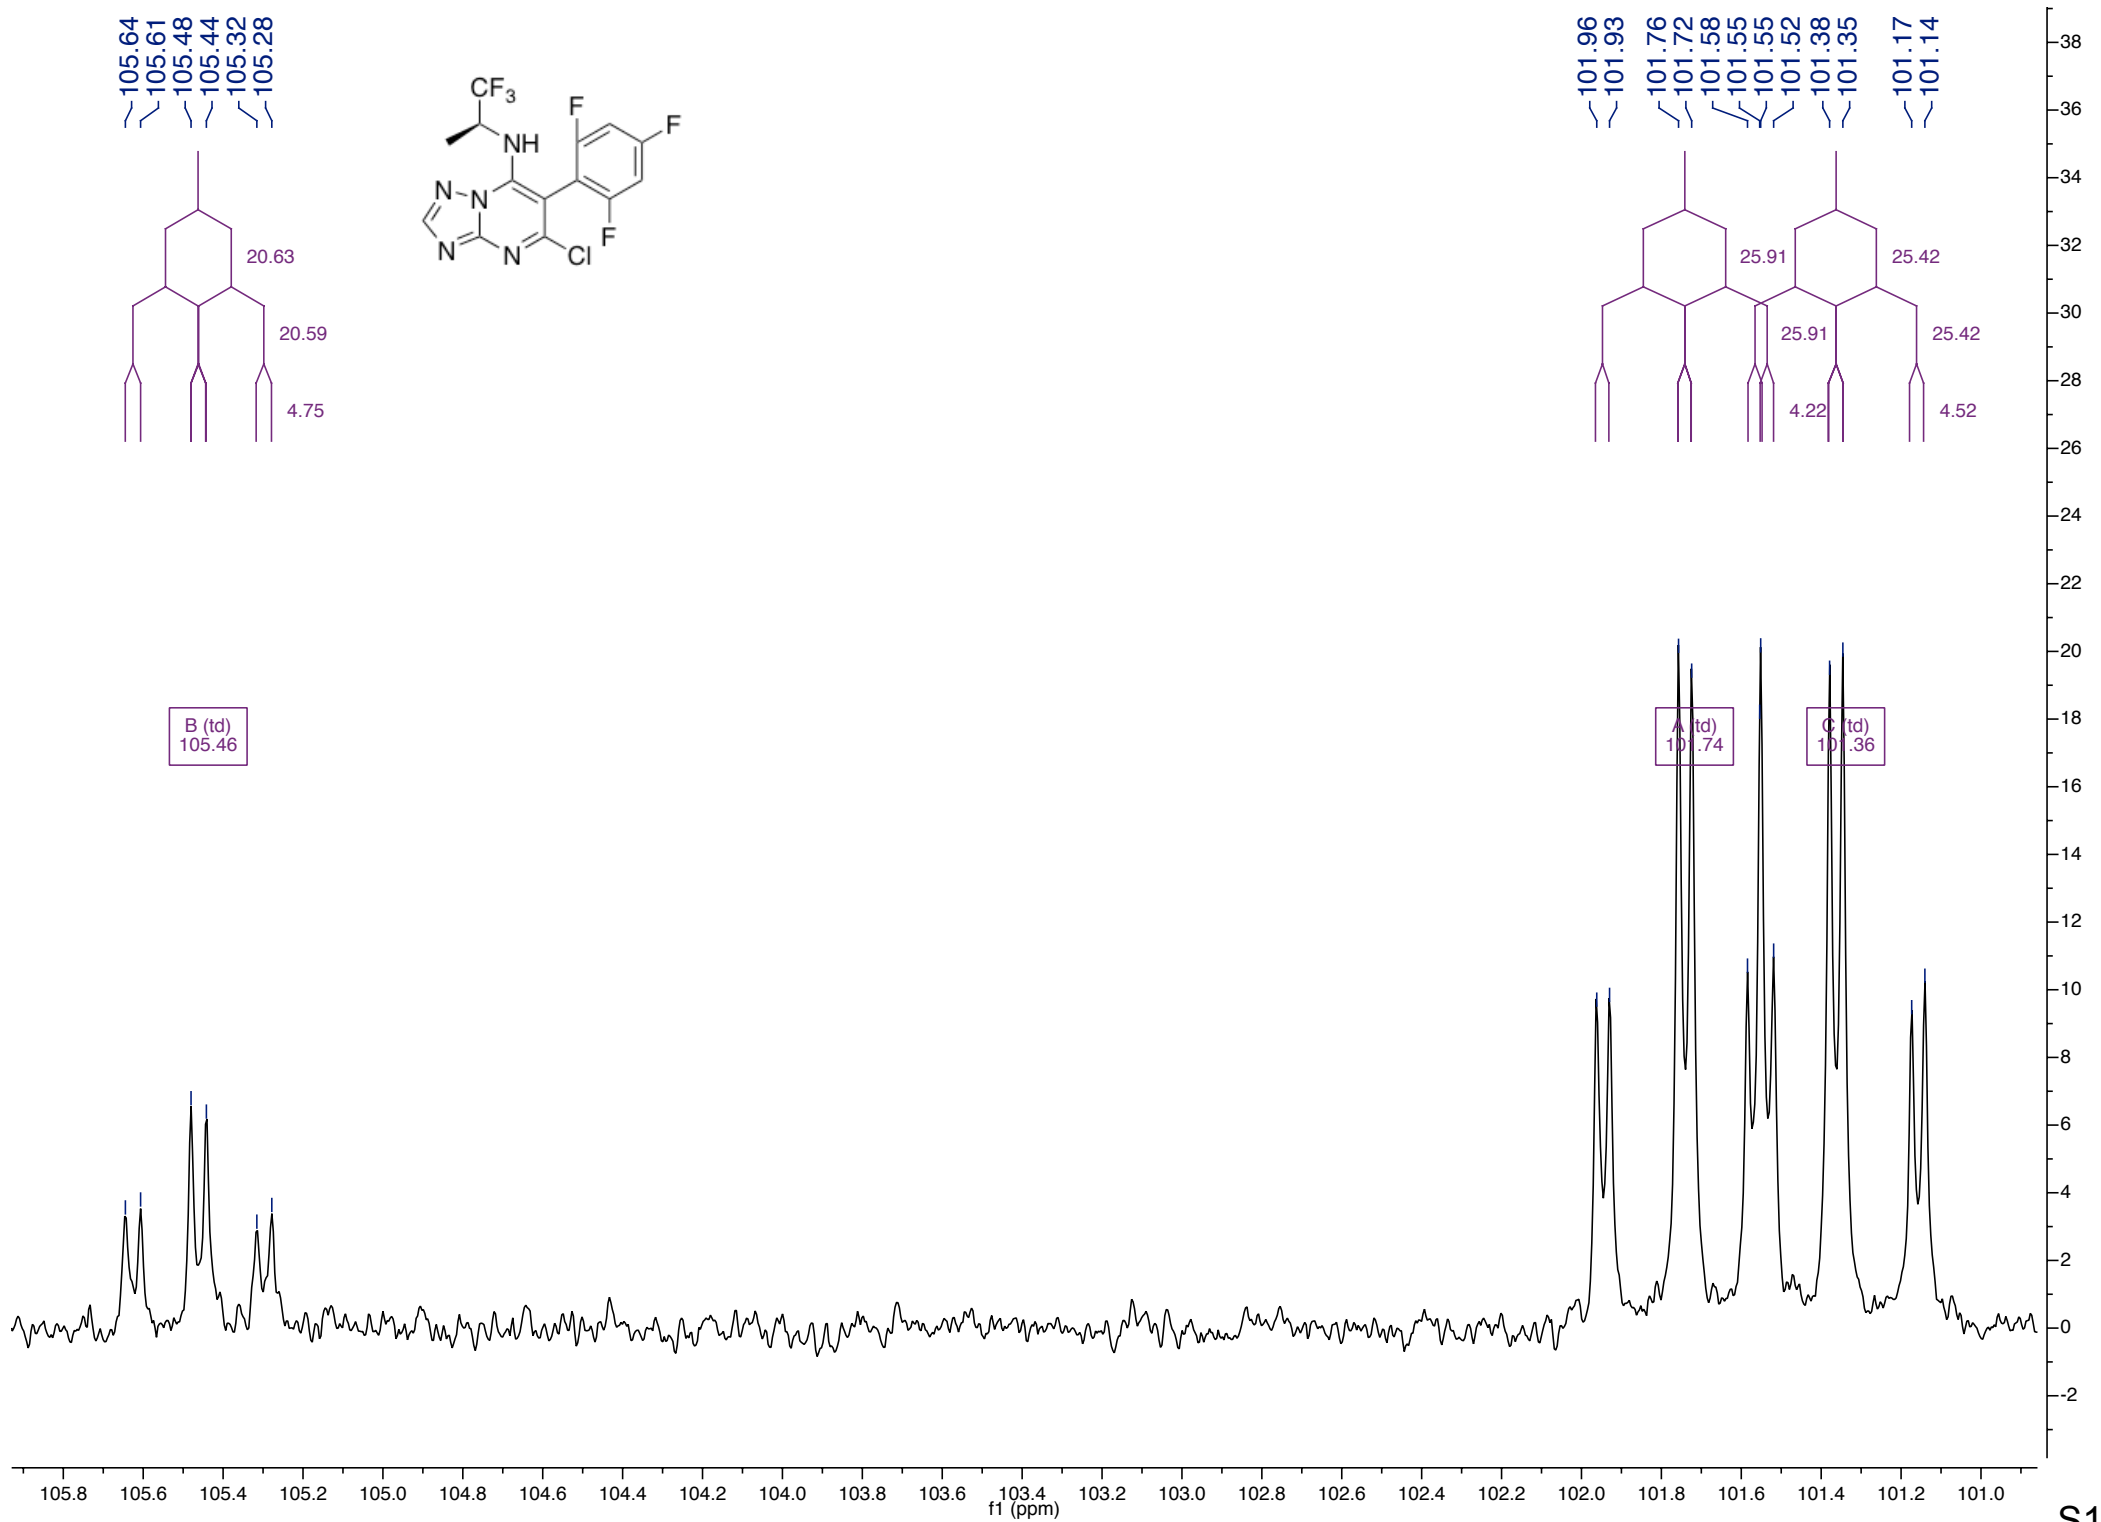

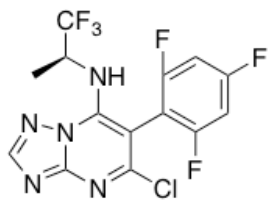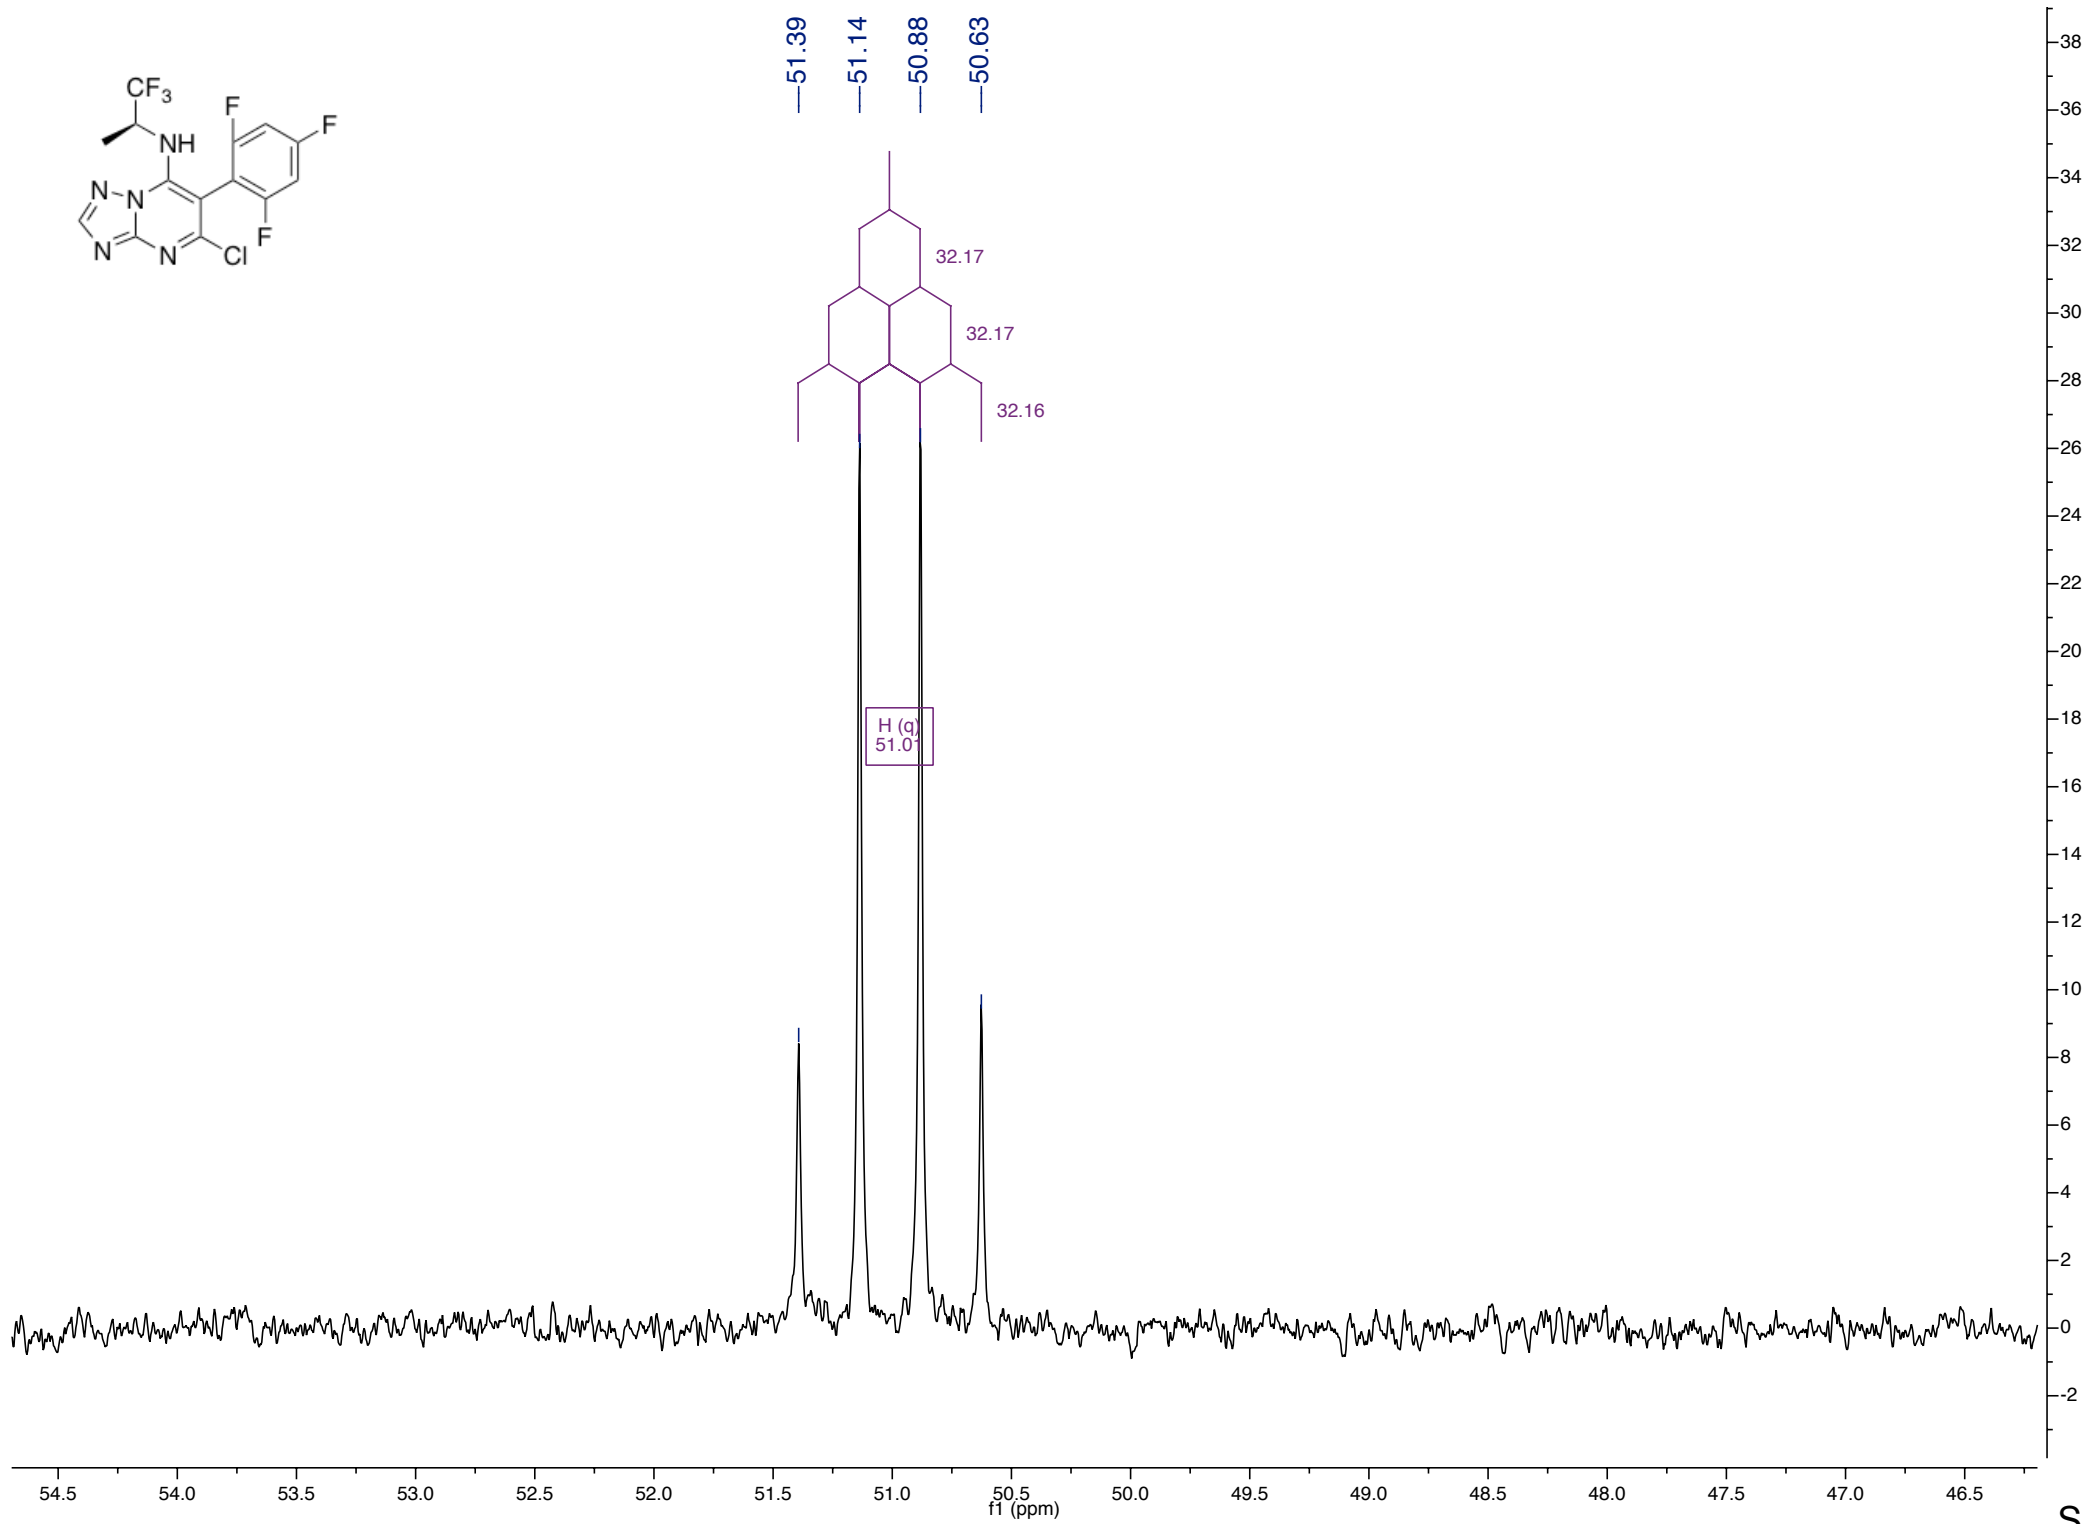

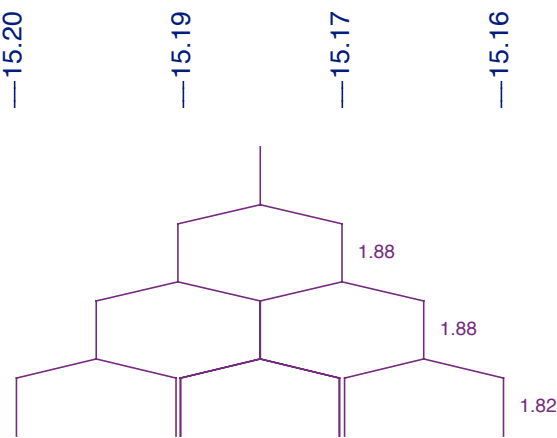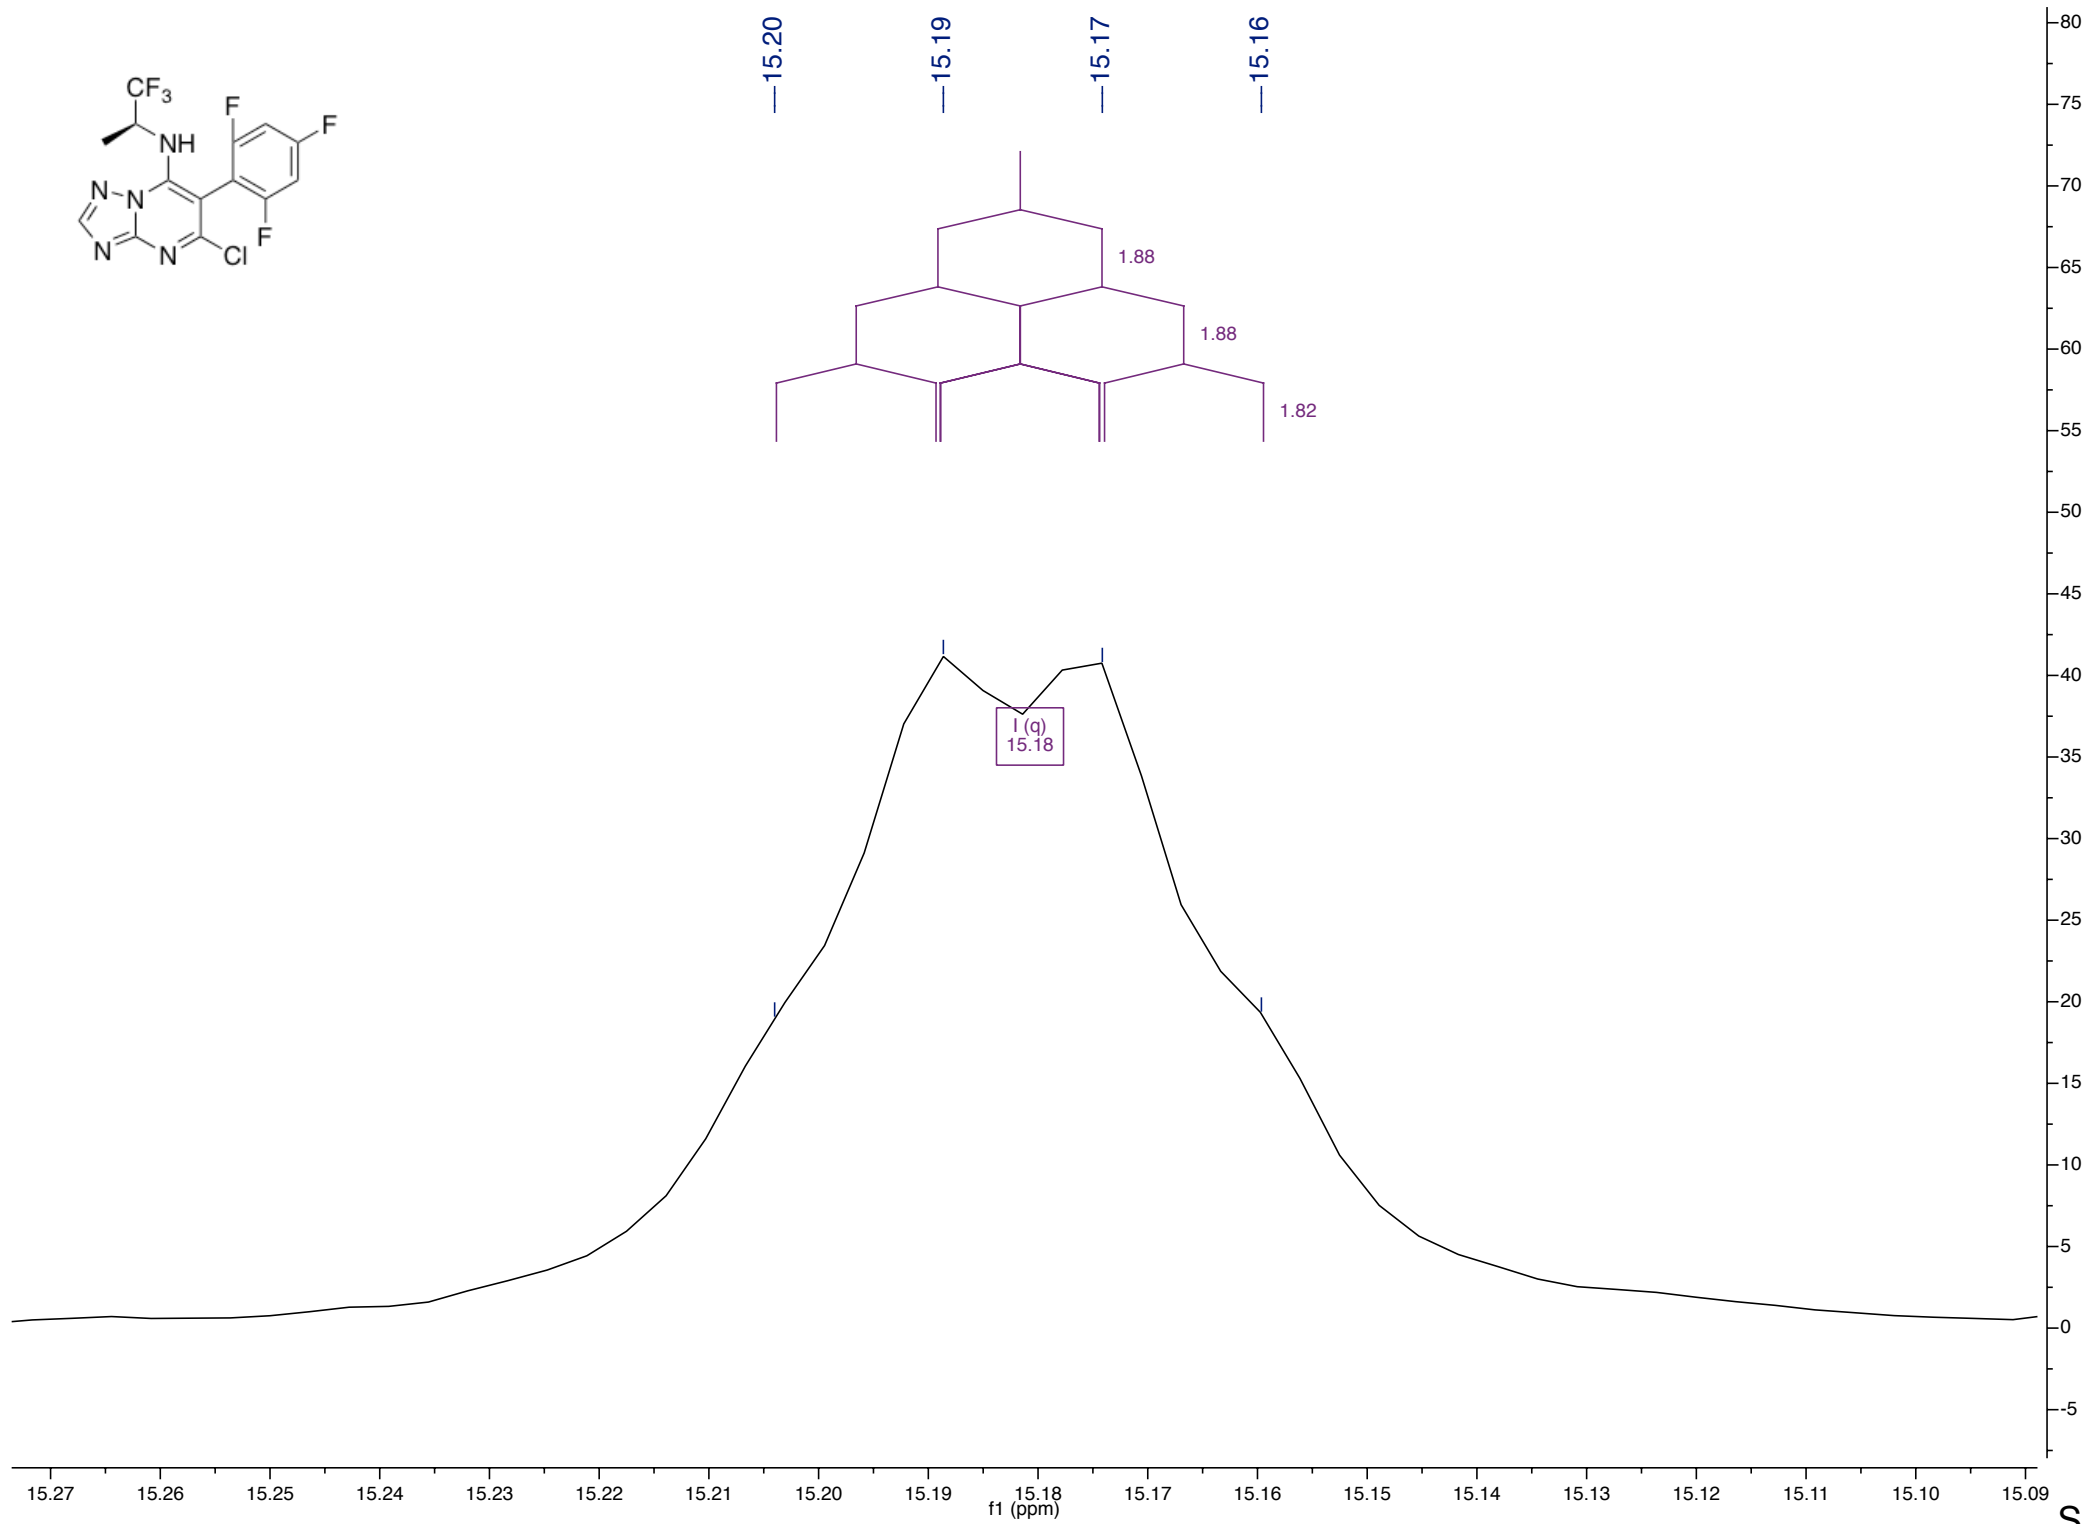

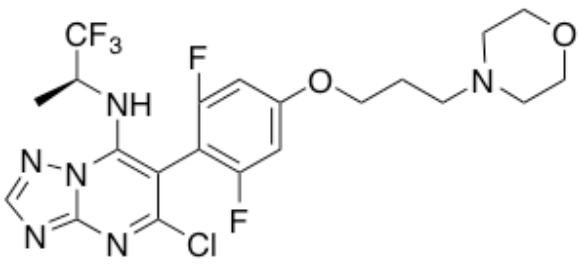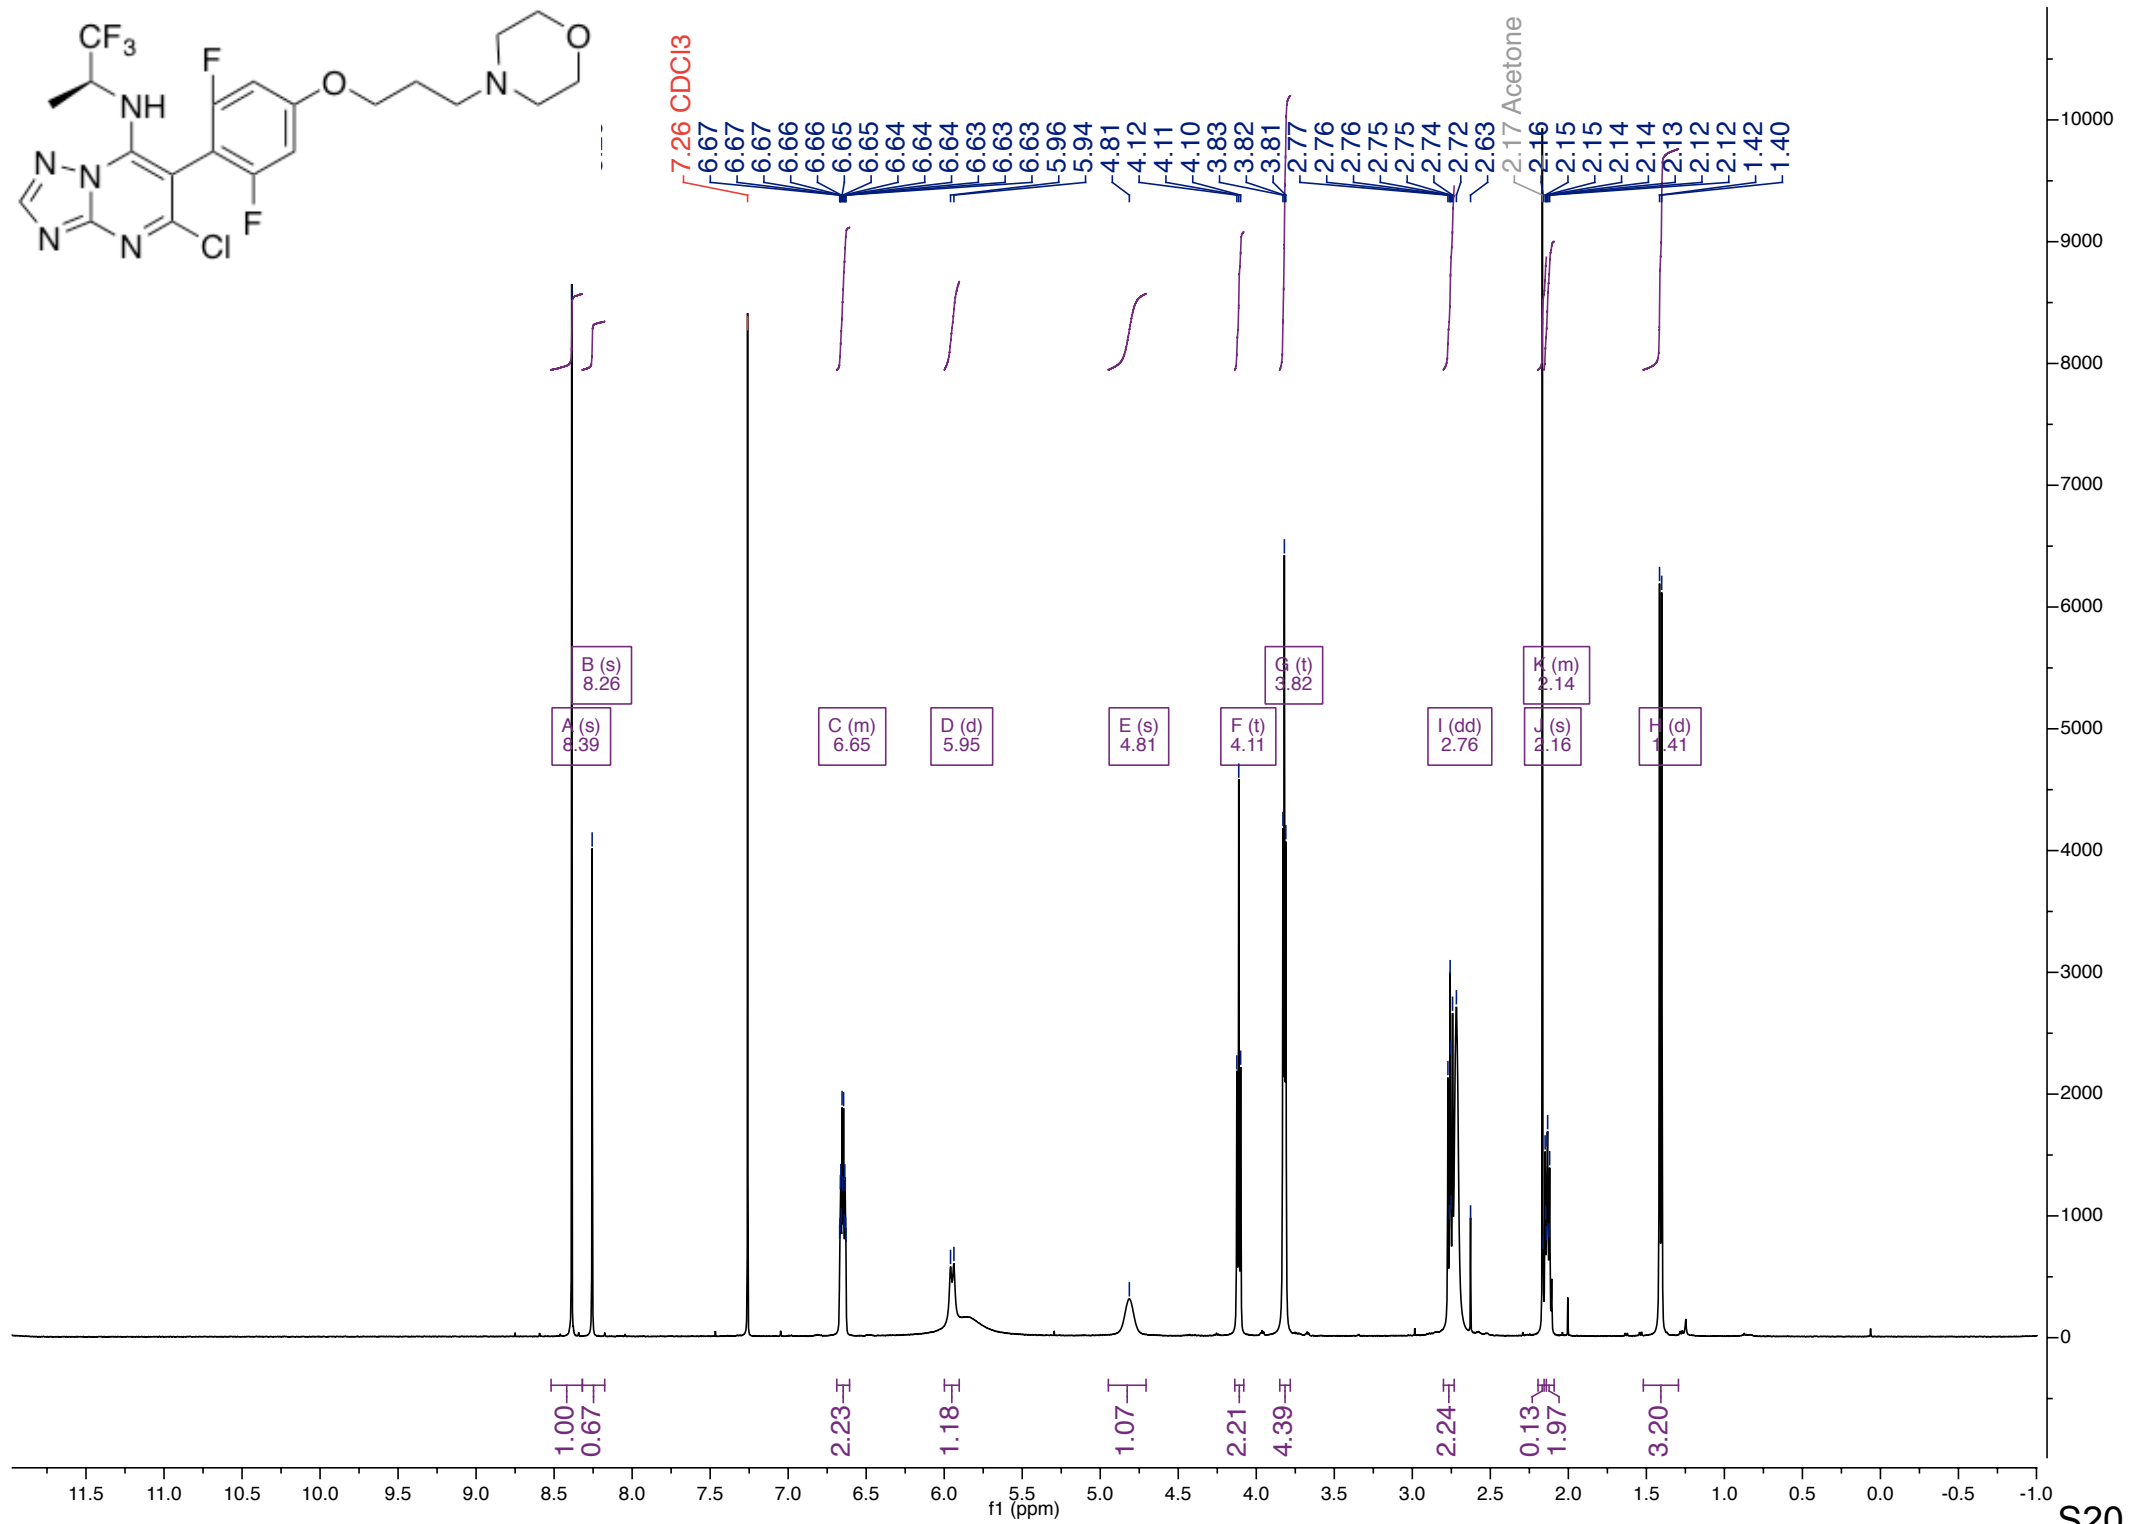

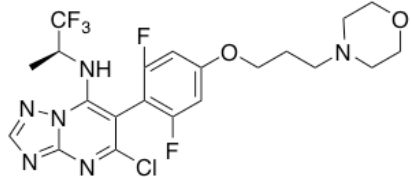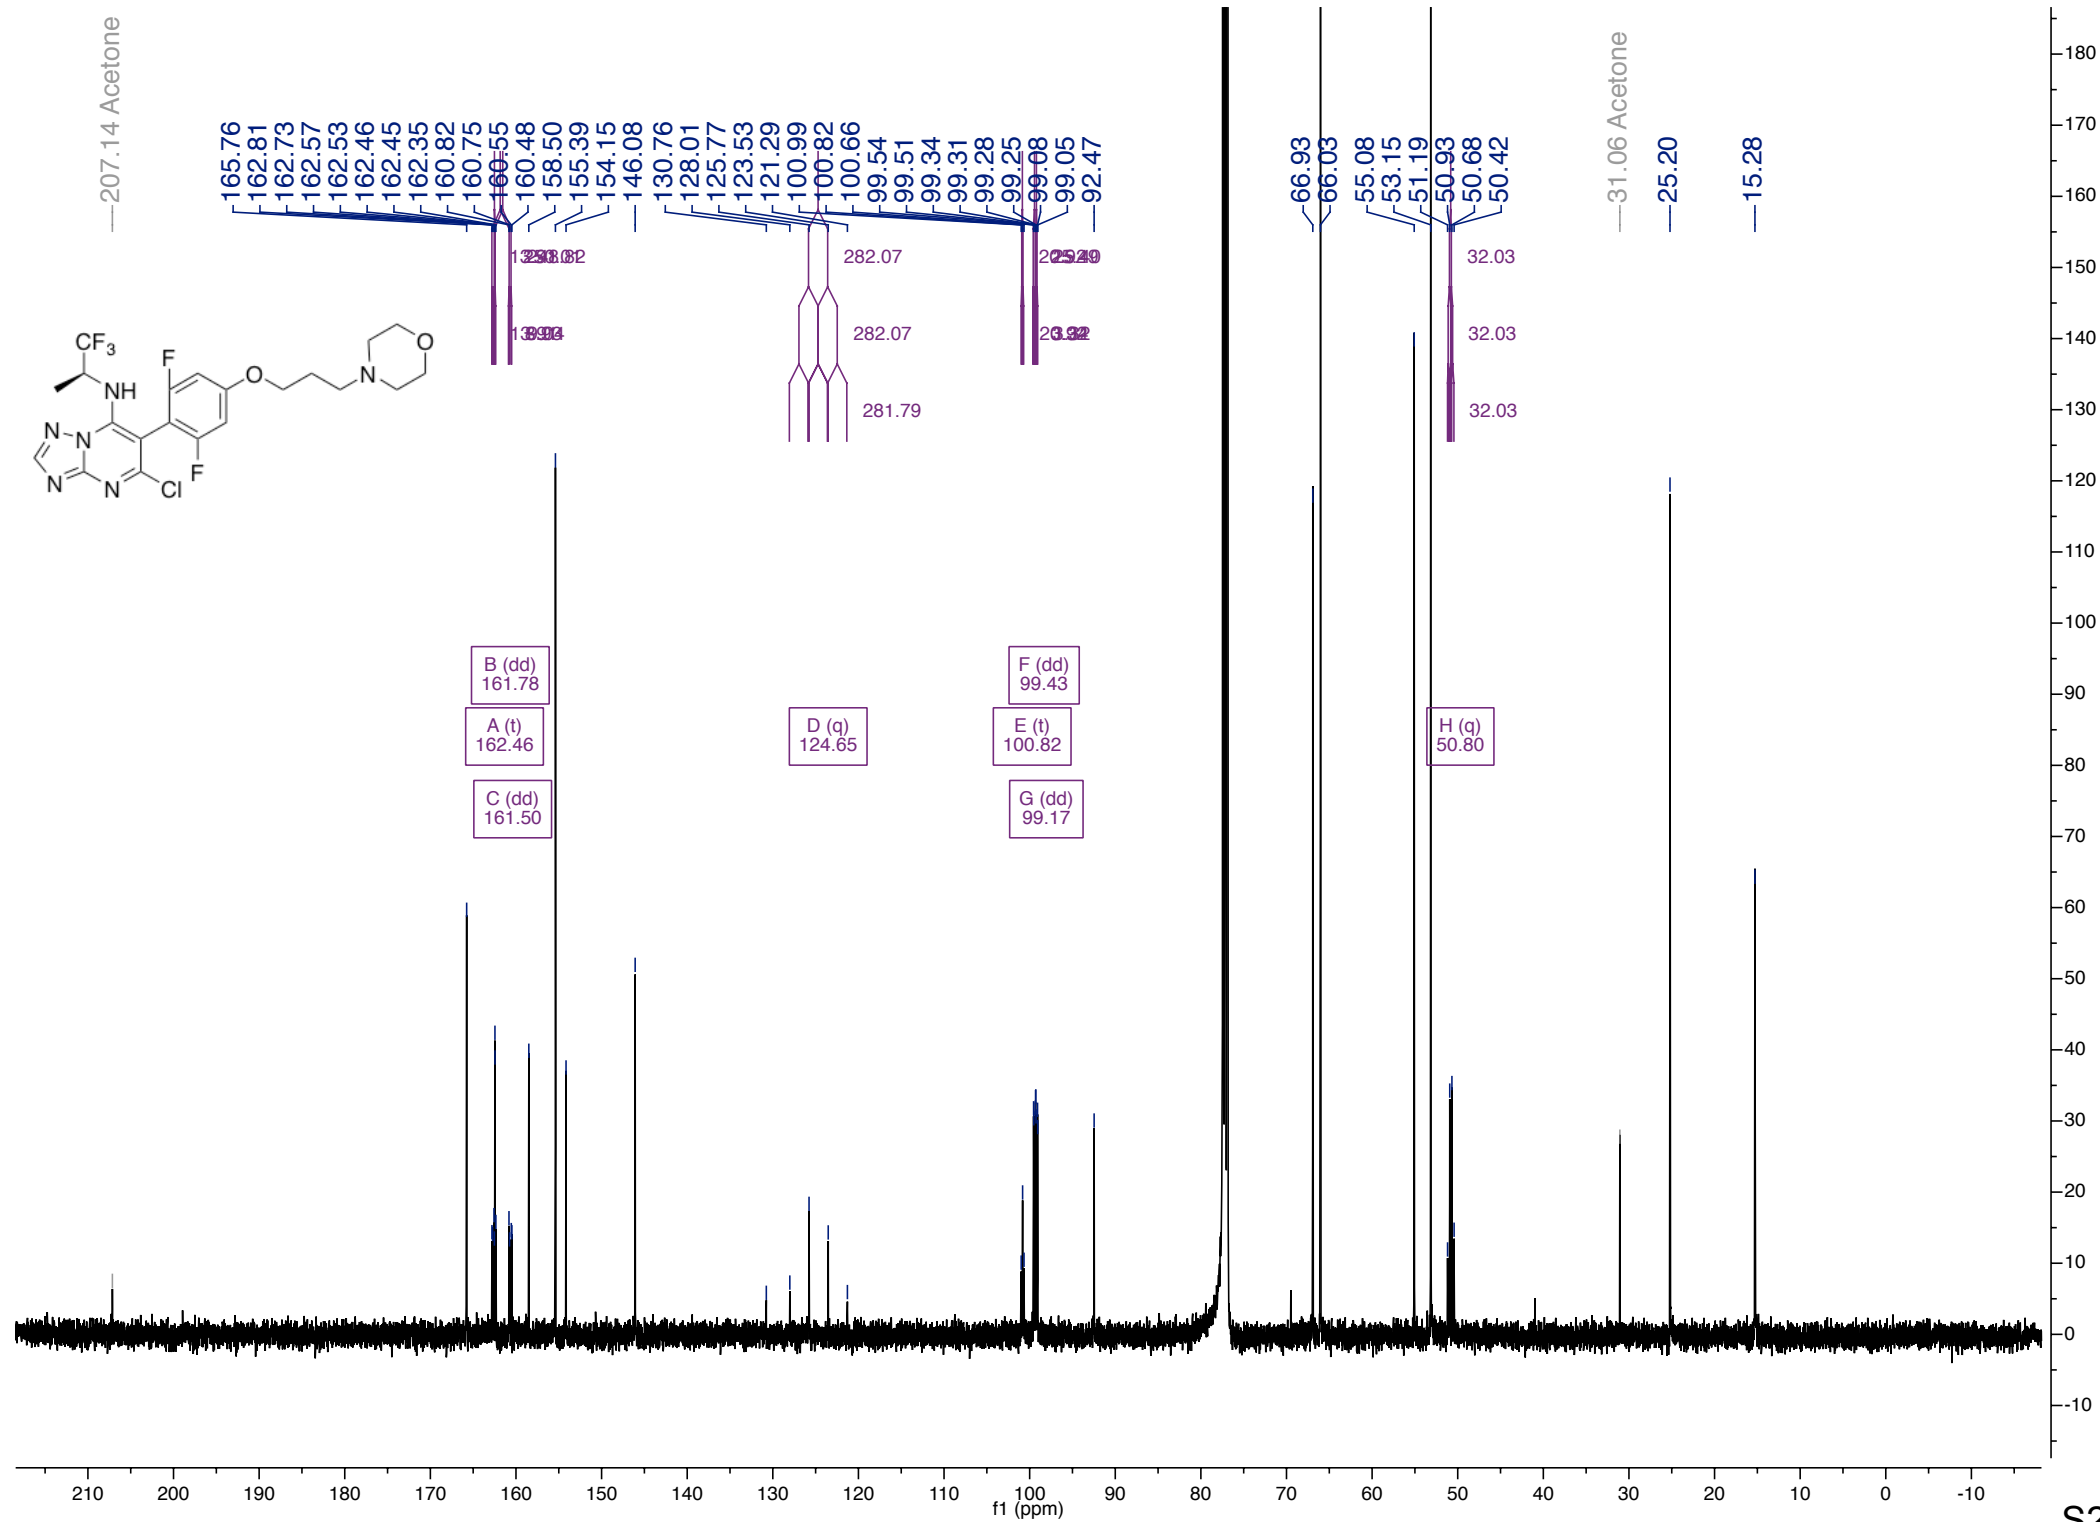

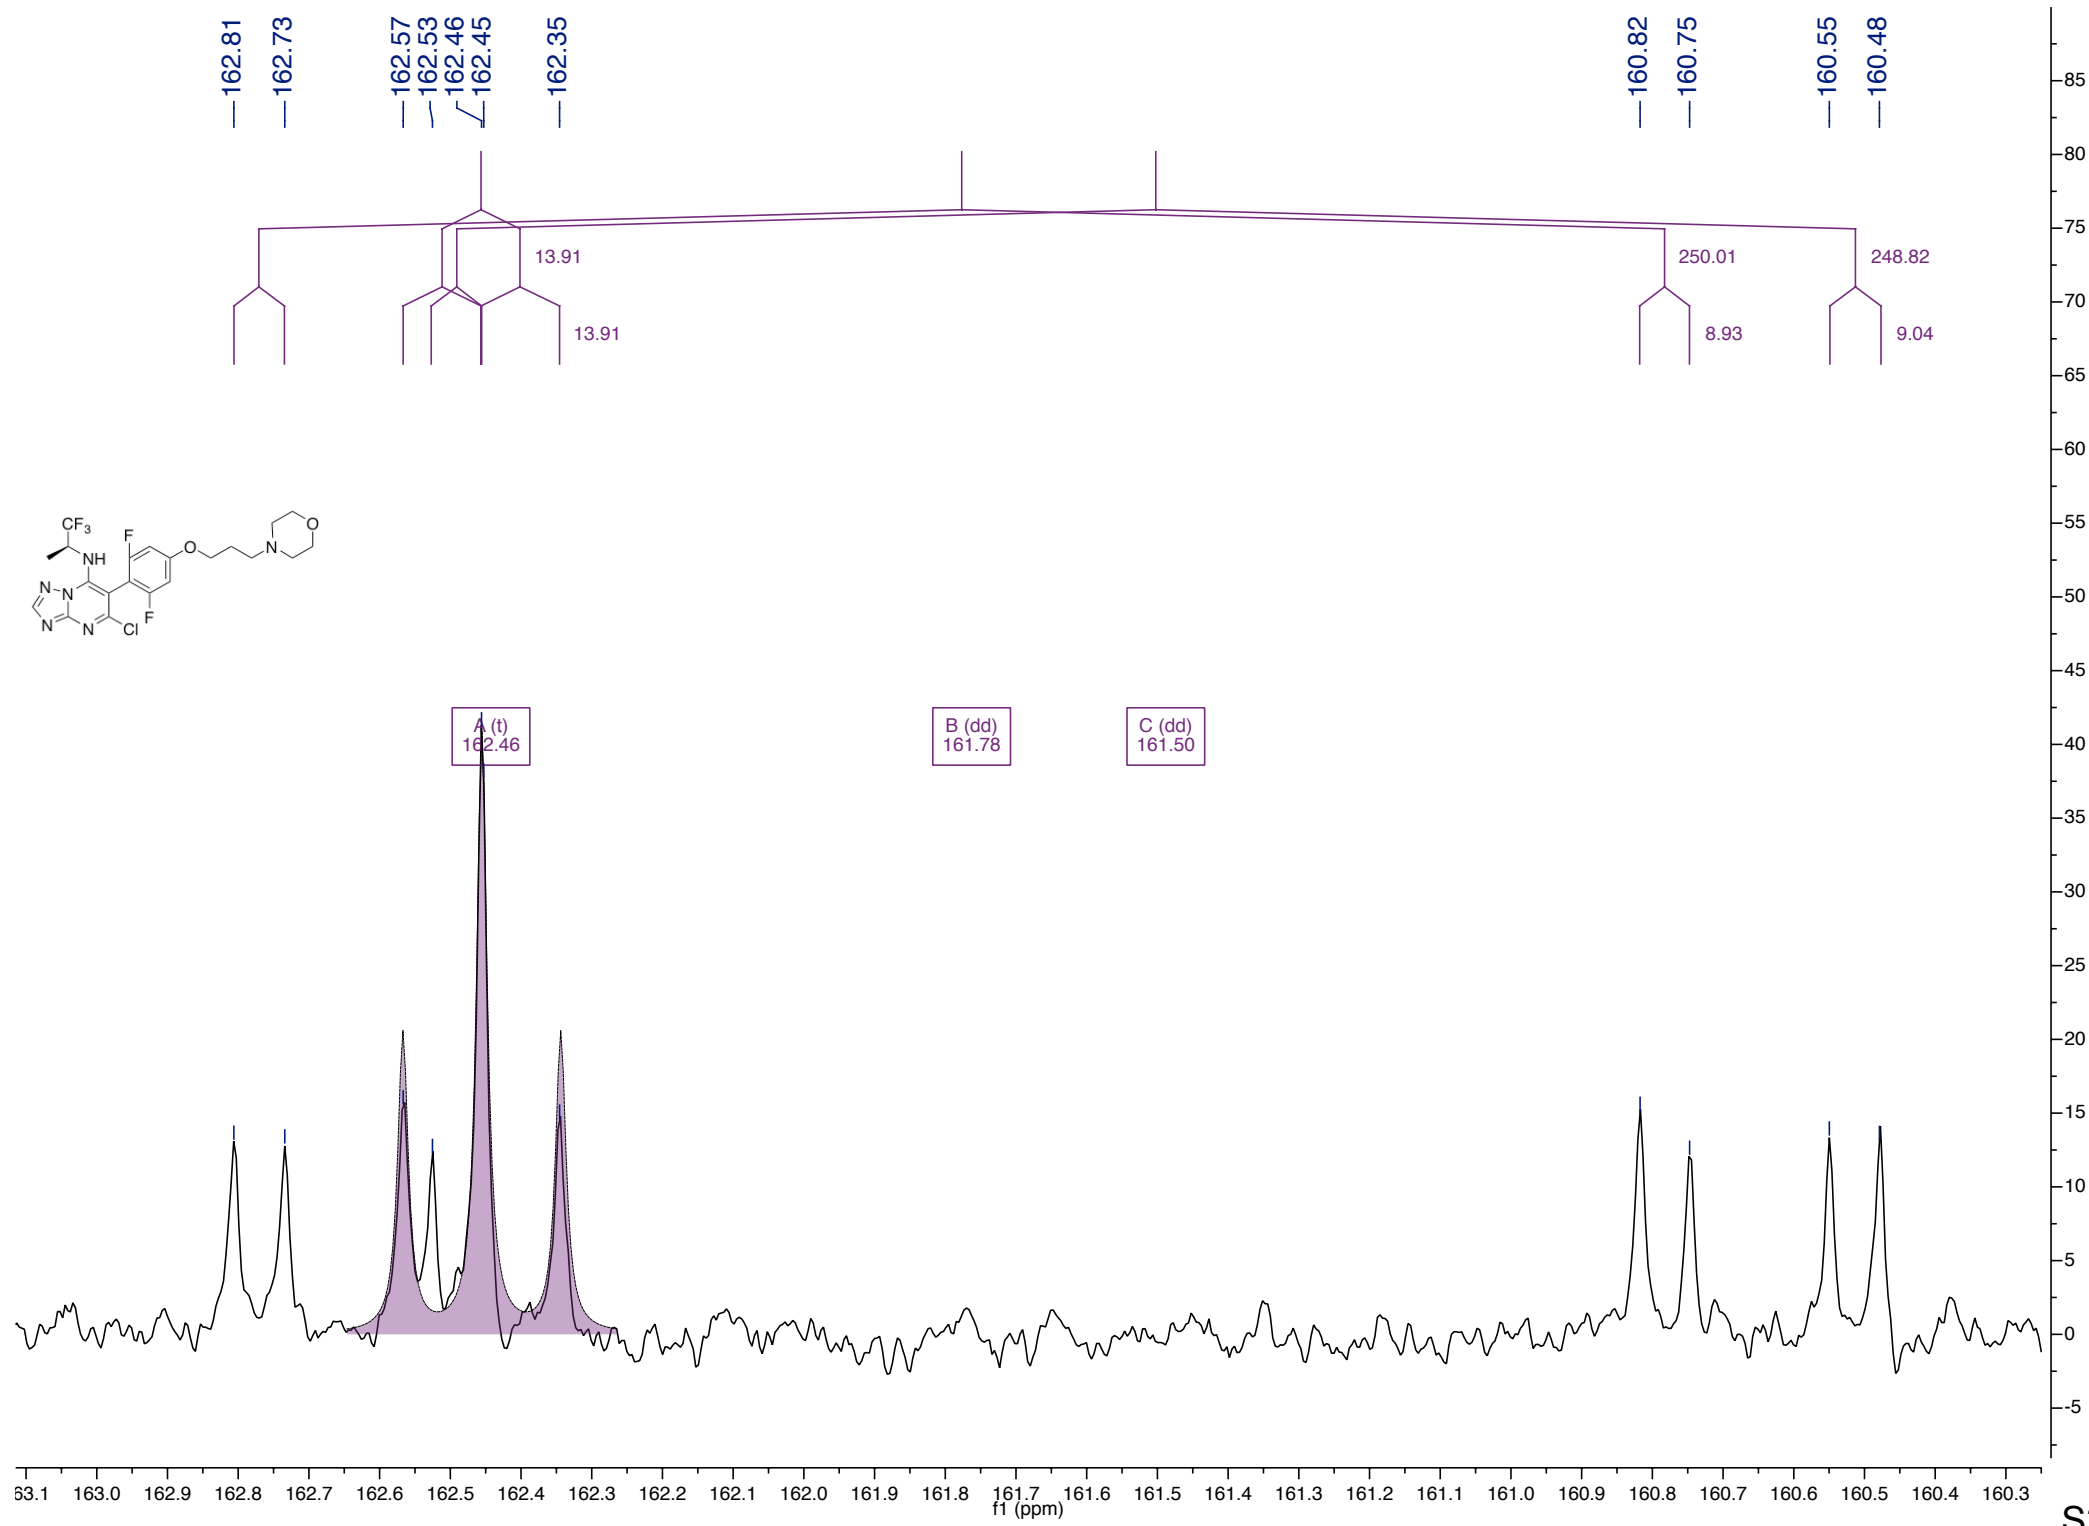

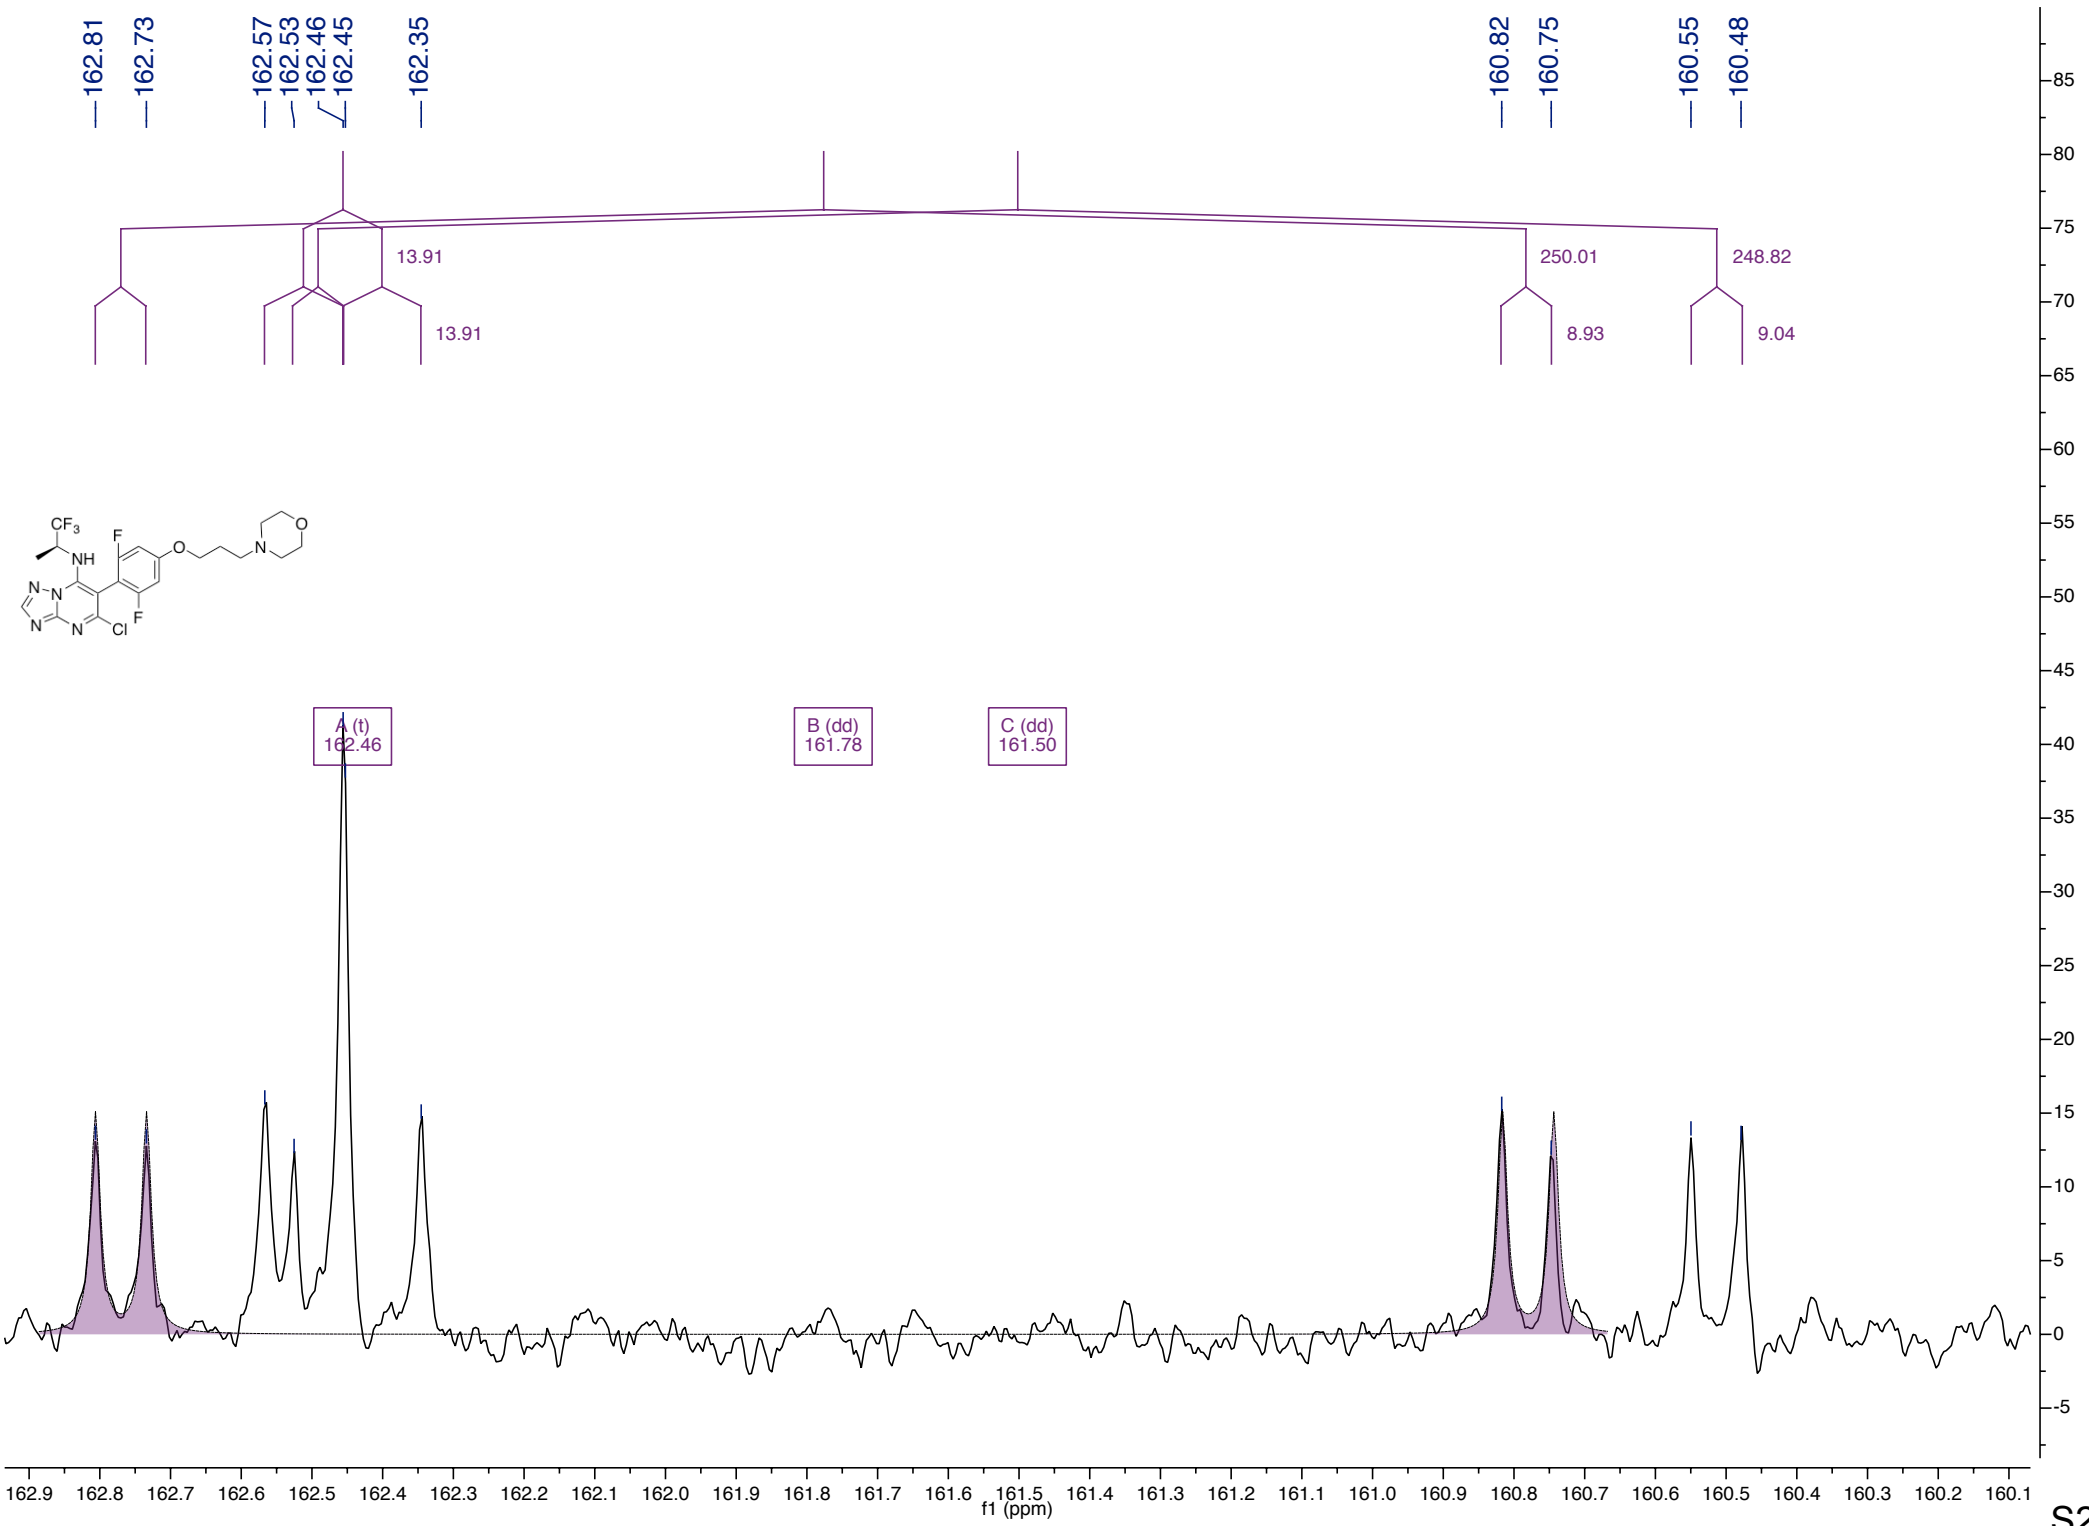





—128.01 —125.77 —123.53 —121.29

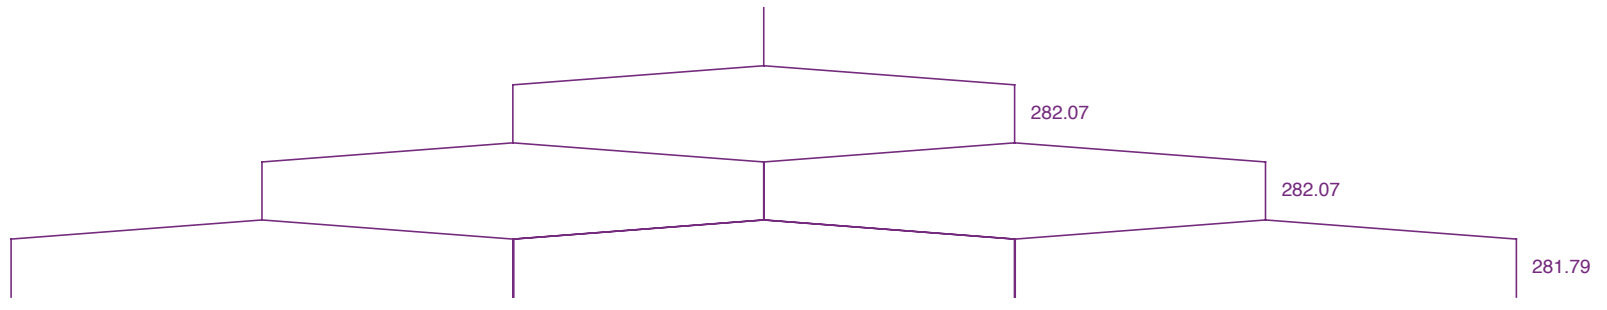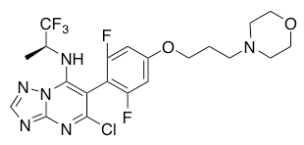

D (q)  
124.65

129.0 128.5 128.0 127.5 127.0 126.5 126.0 125.5 125.0 124.5 124.0 123.5 123.0 122.5 122.0 121.5 121.0 120.5  
f1 (ppm)

85  
80  
75  
70  
65  
60  
55  
50  
45  
40  
35  
30  
25  
20  
15  
10  
5  
0  
-5



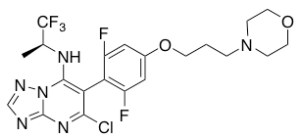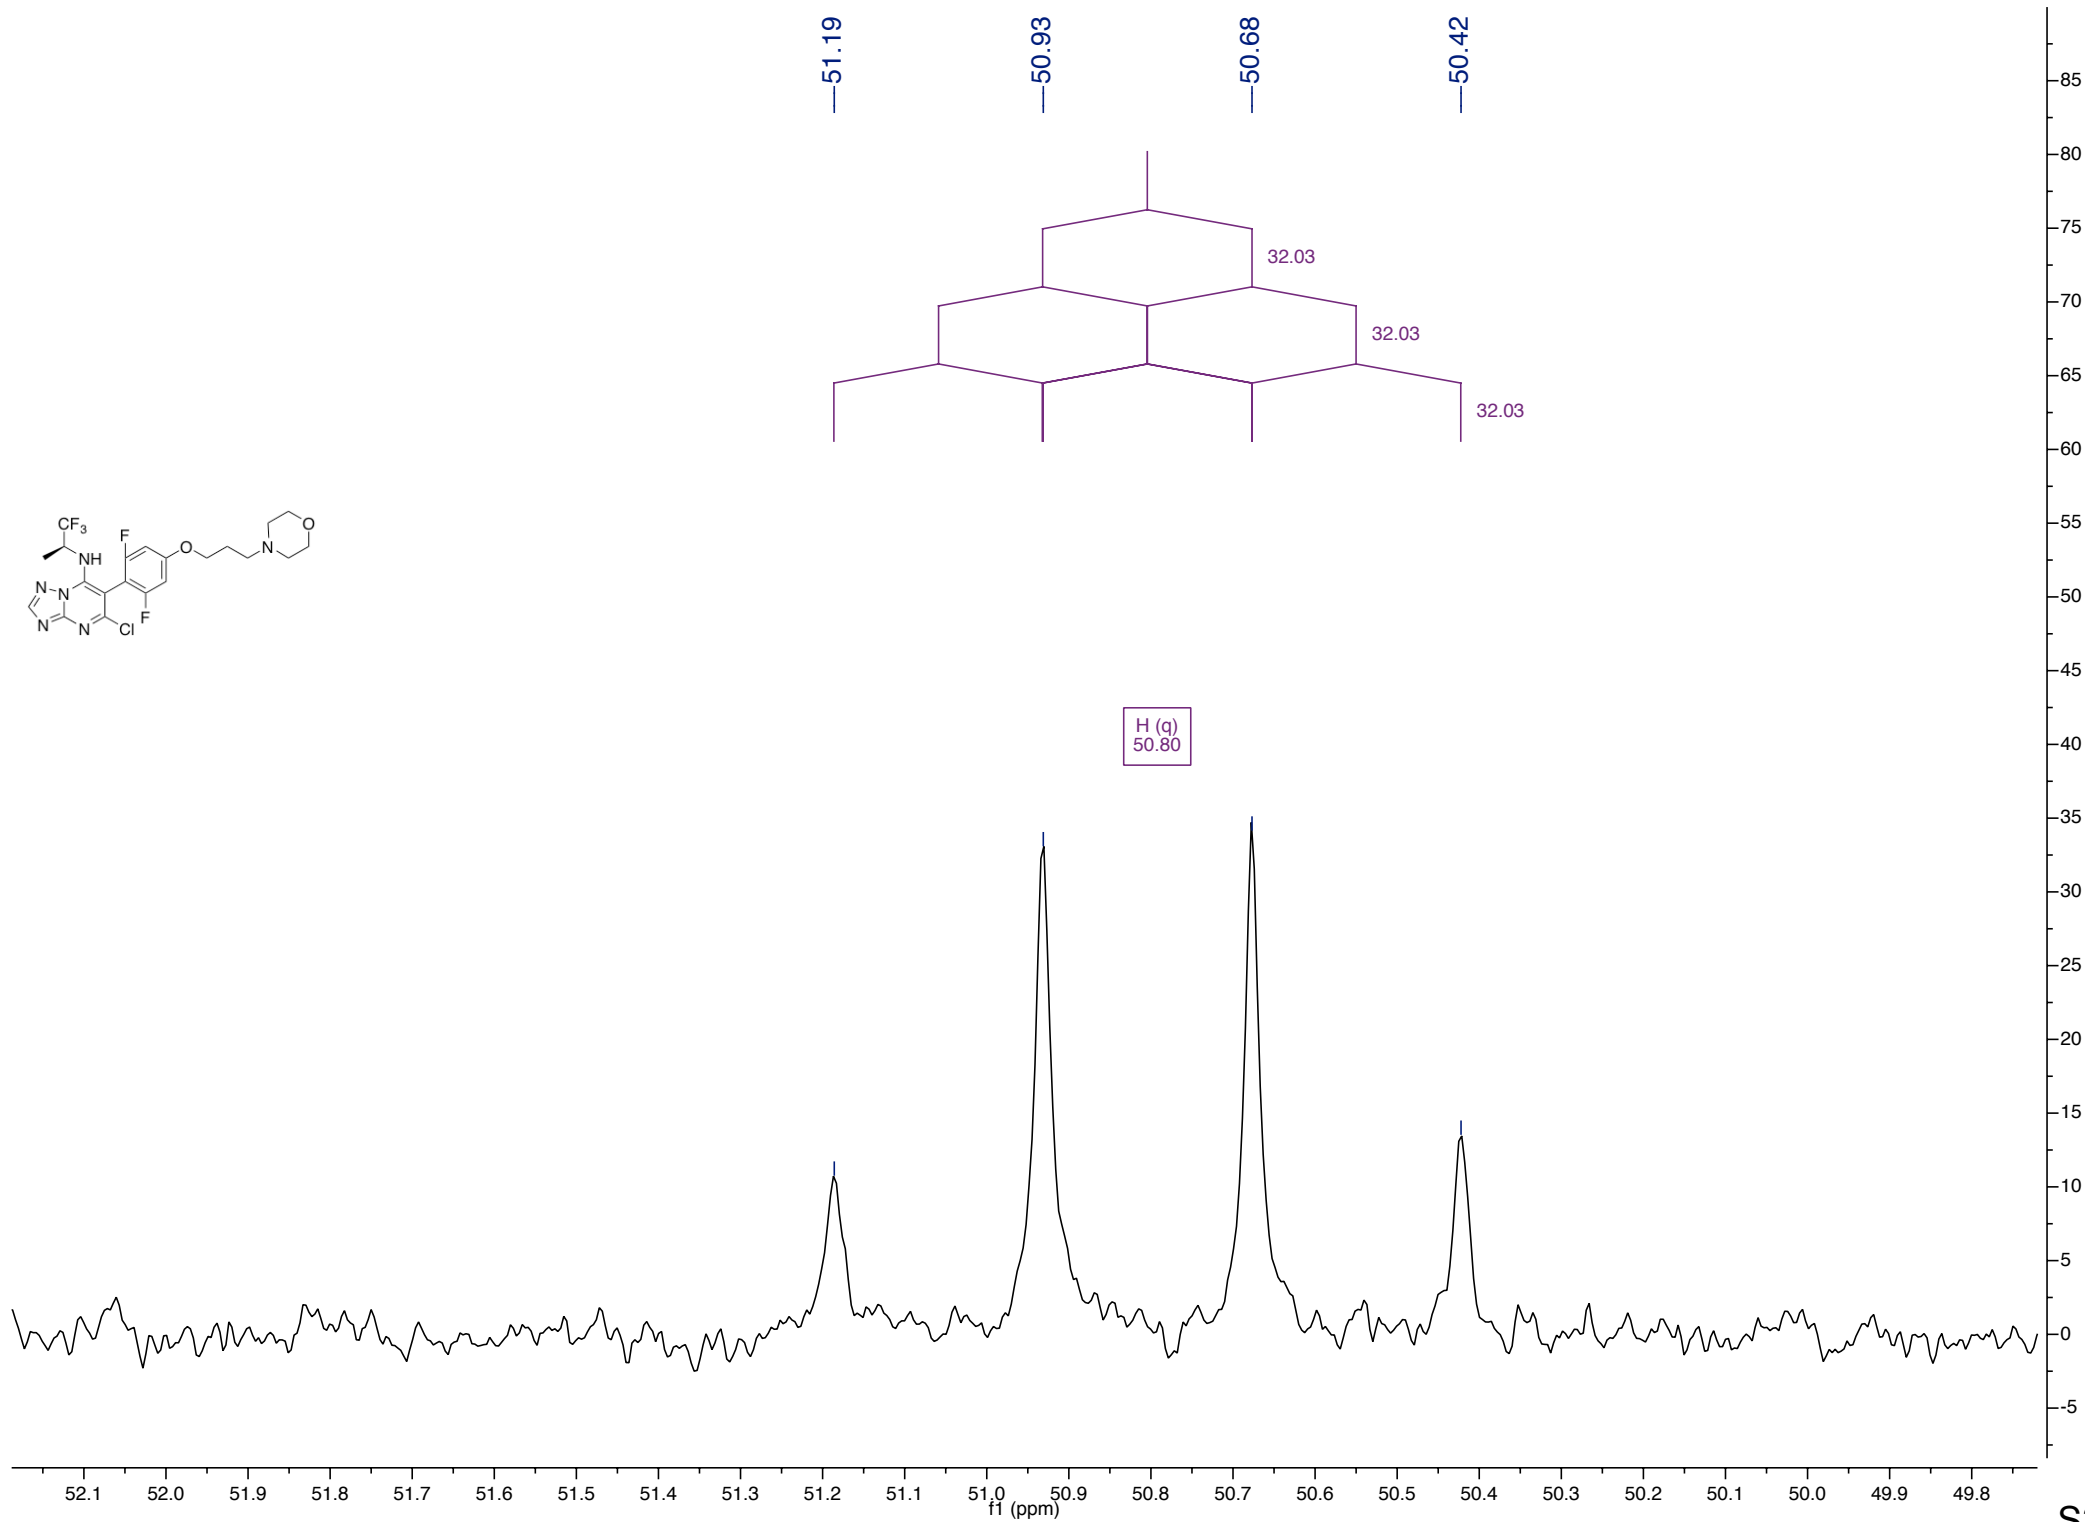

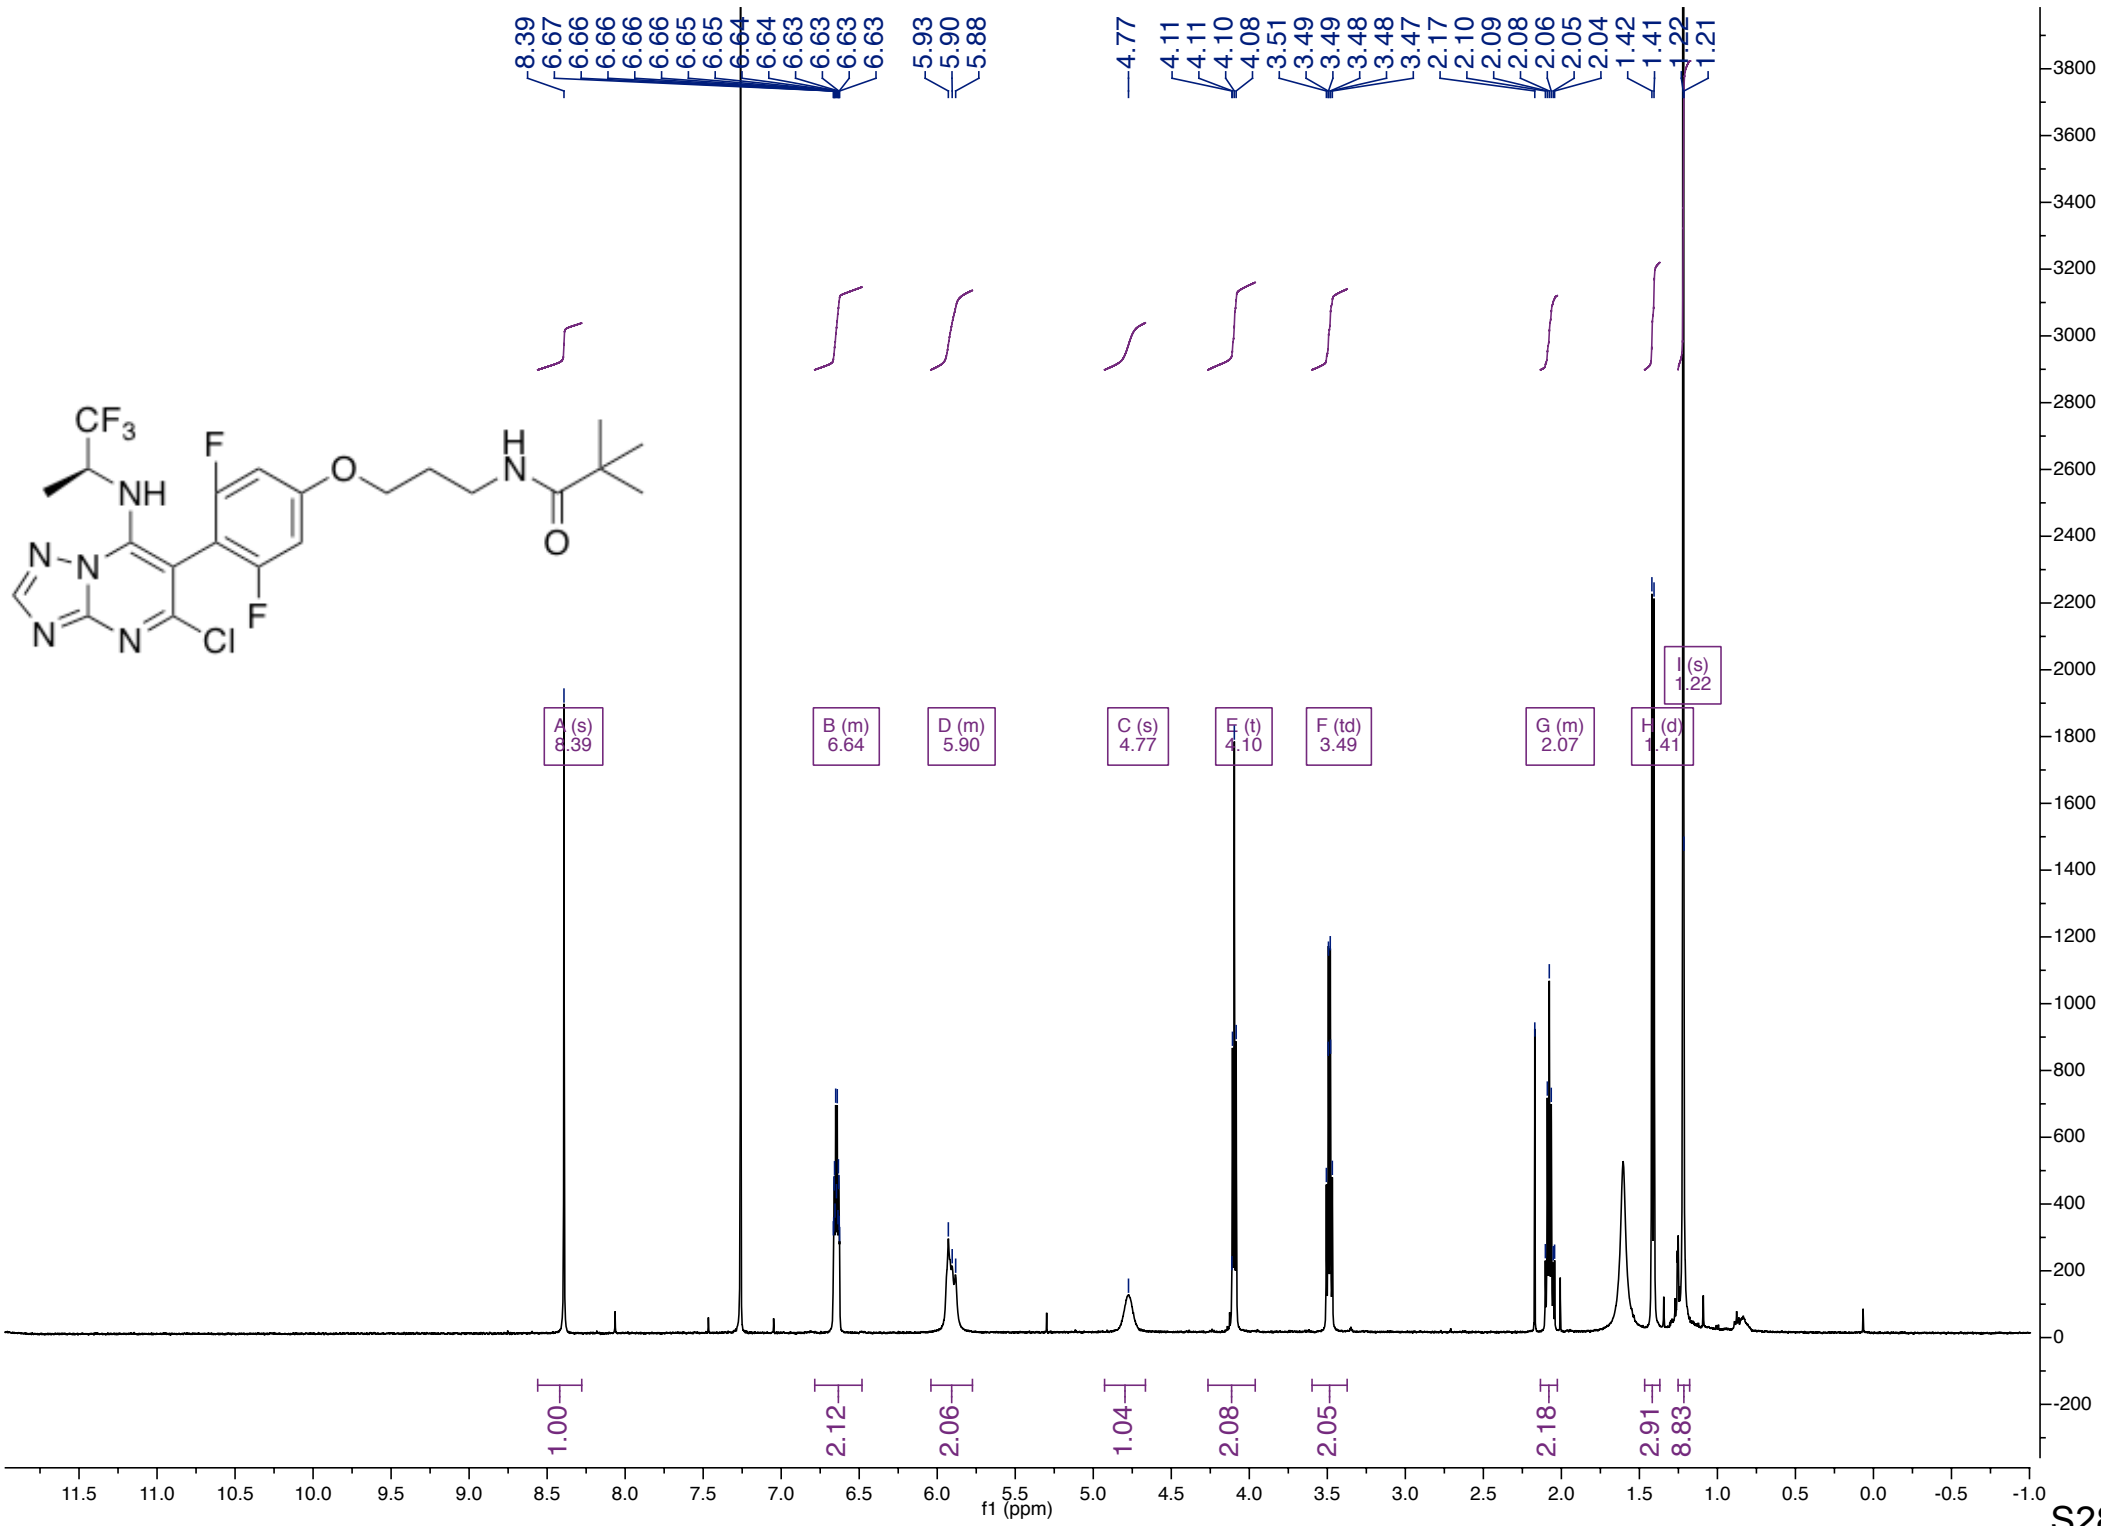

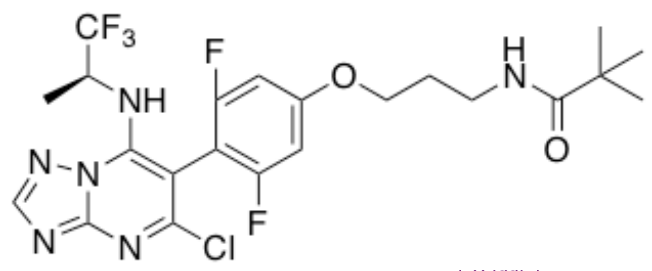

178.92  
162.89  
162.82  
162.62  
162.61  
162.55  
162.51  
162.40  
160.90  
160.83  
160.64  
160.57  
158.55  
155.52  
154.20  
146.08

128.05  
125.81  
123.57  
121.33  
101.14  
100.97  
100.80  
99.57  
99.55  
99.37  
99.34  
99.27  
99.24  
99.07  
99.04  
92.42

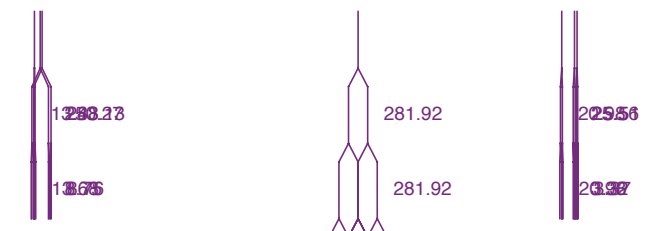

B (dd)  
161.86

A (t)  
162.51

C (dd)  
161.59

D (q)  
124.69

F (dd)  
99.46

E (t)  
100.97

G (dd)  
99.15

H (d)  
50.85

67.62  
50.97  
50.72  
38.93  
37.27  
29.27  
27.82  
15.40

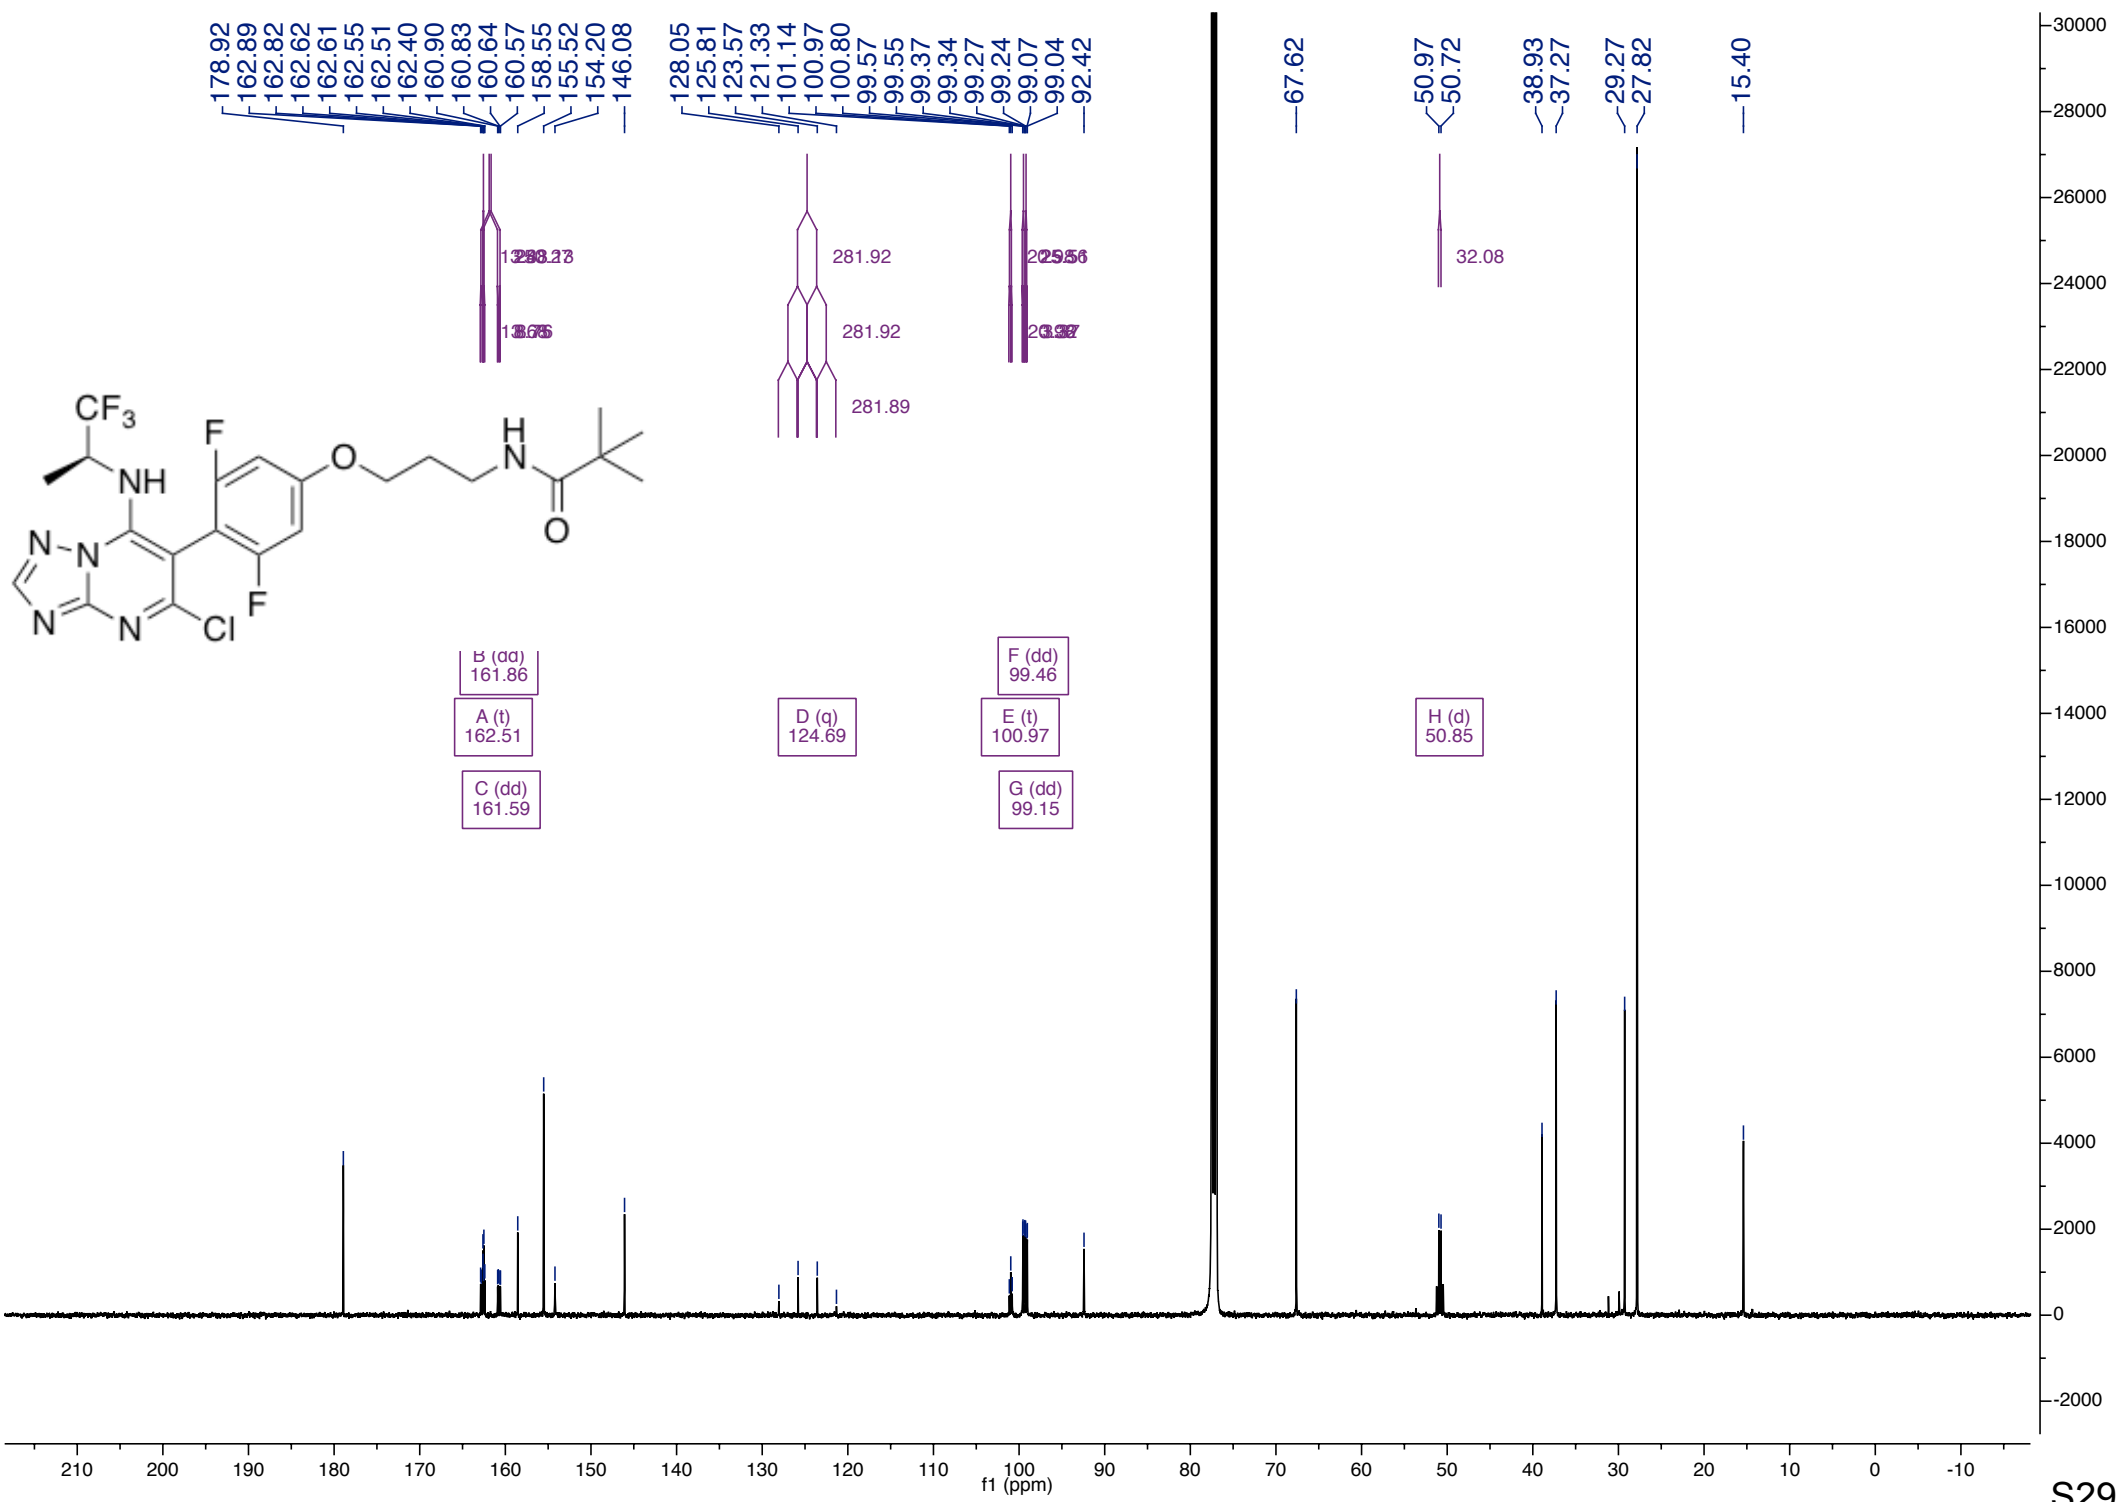

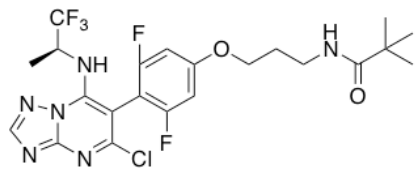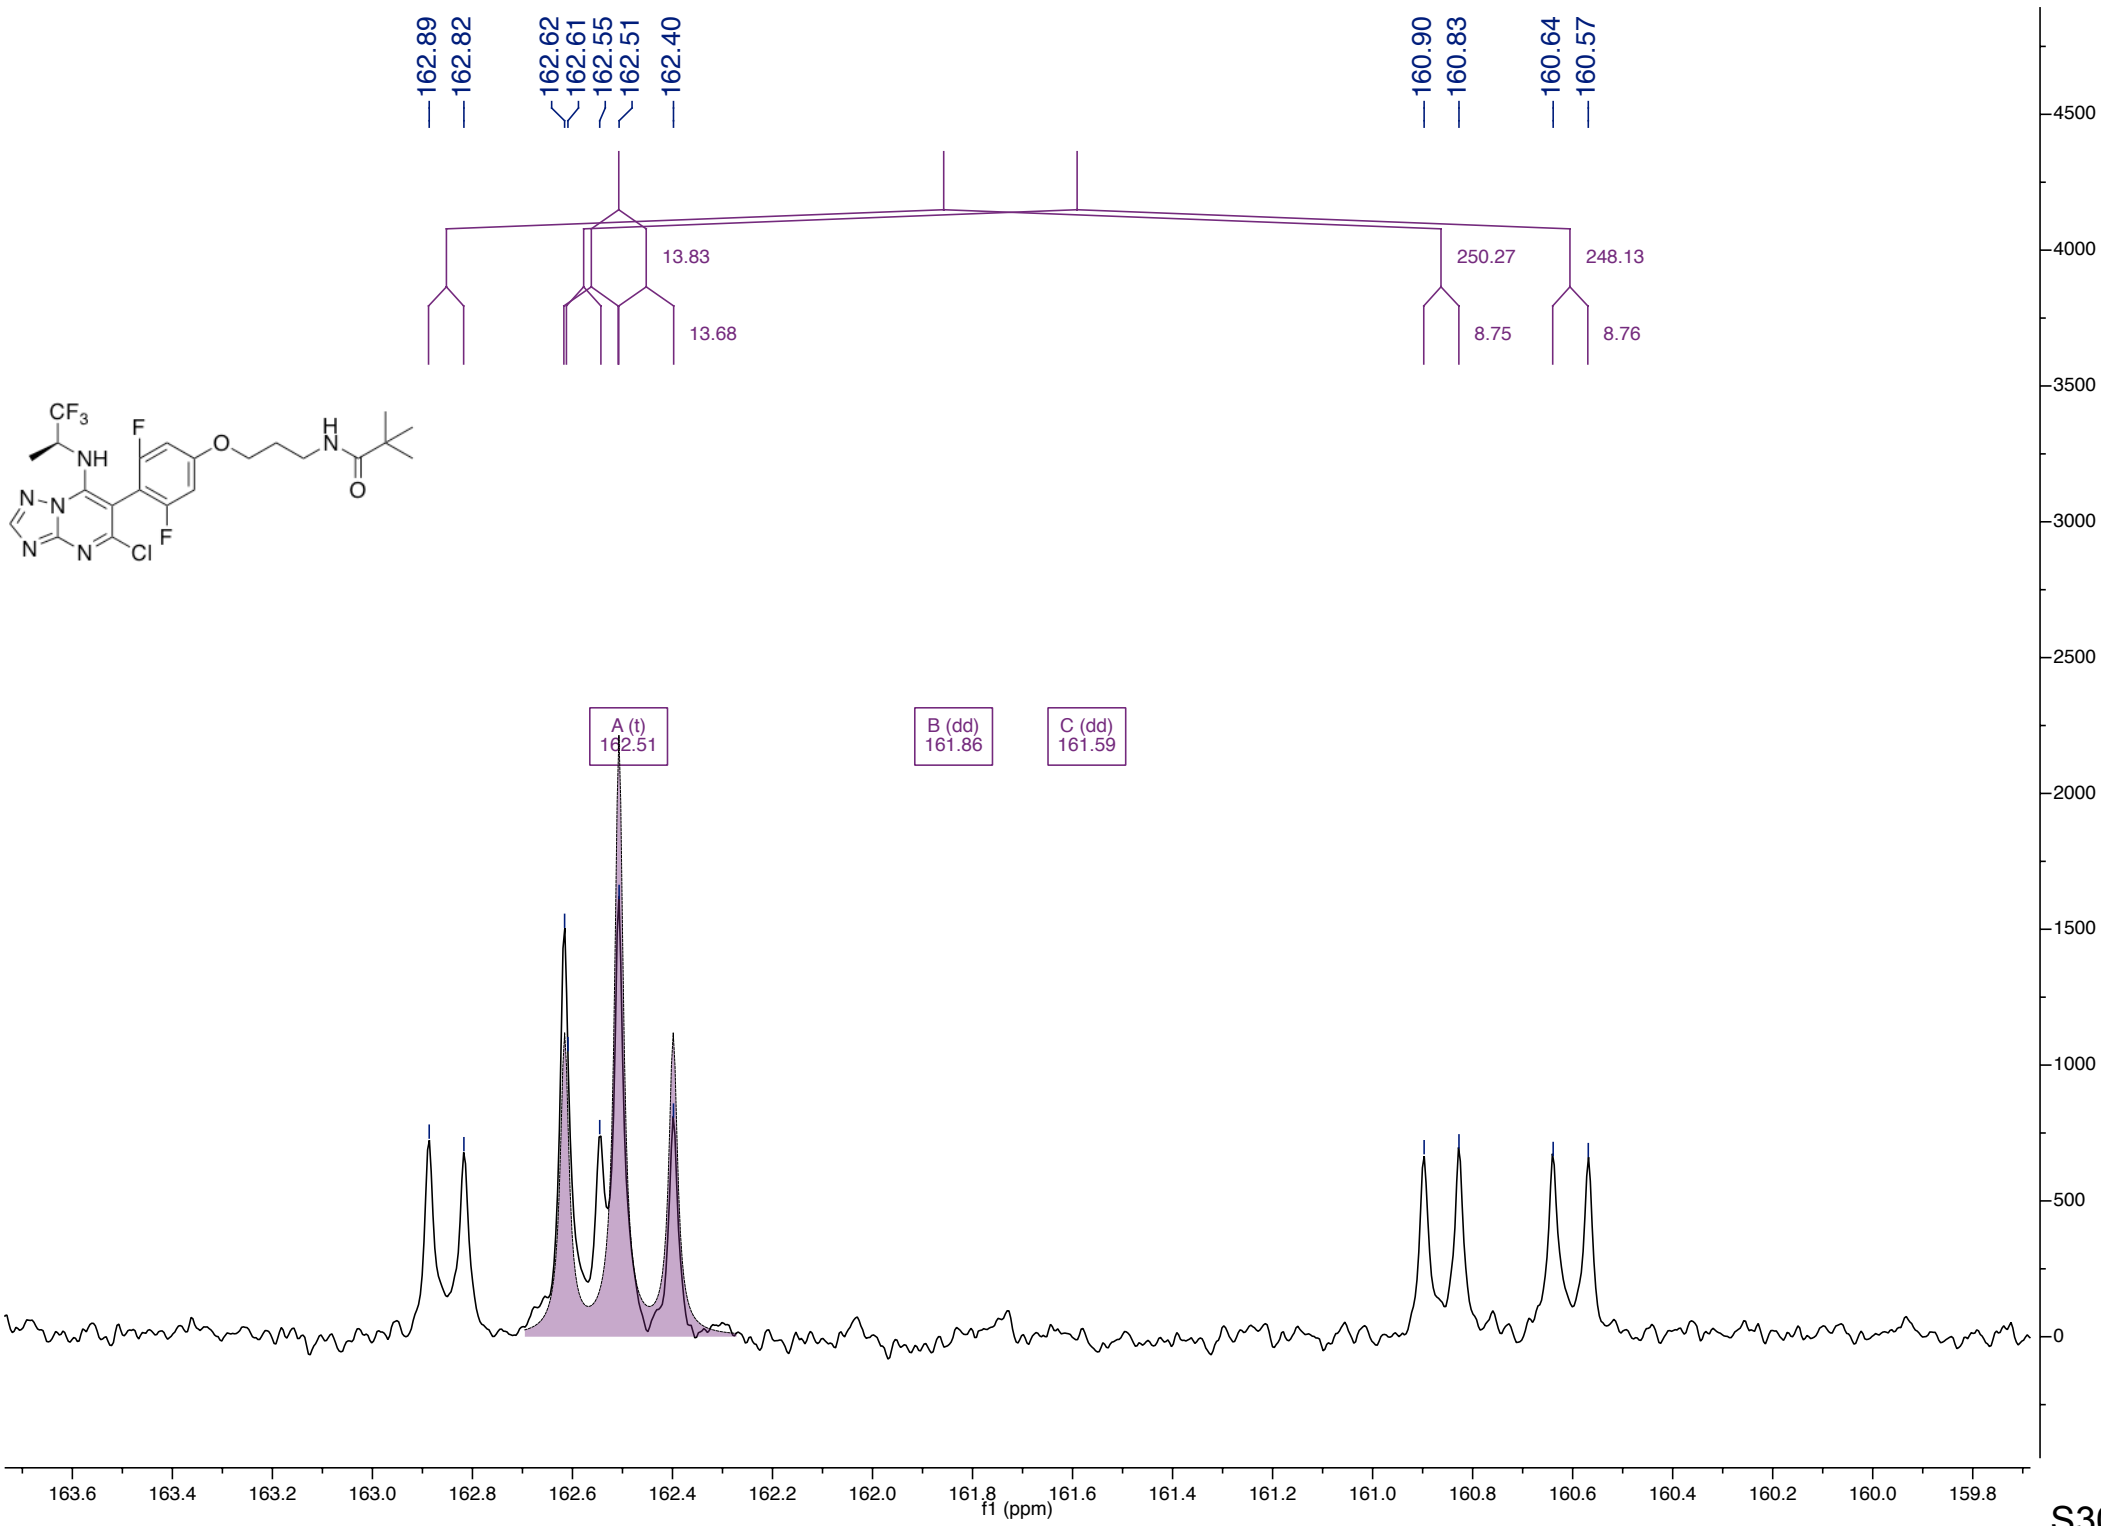

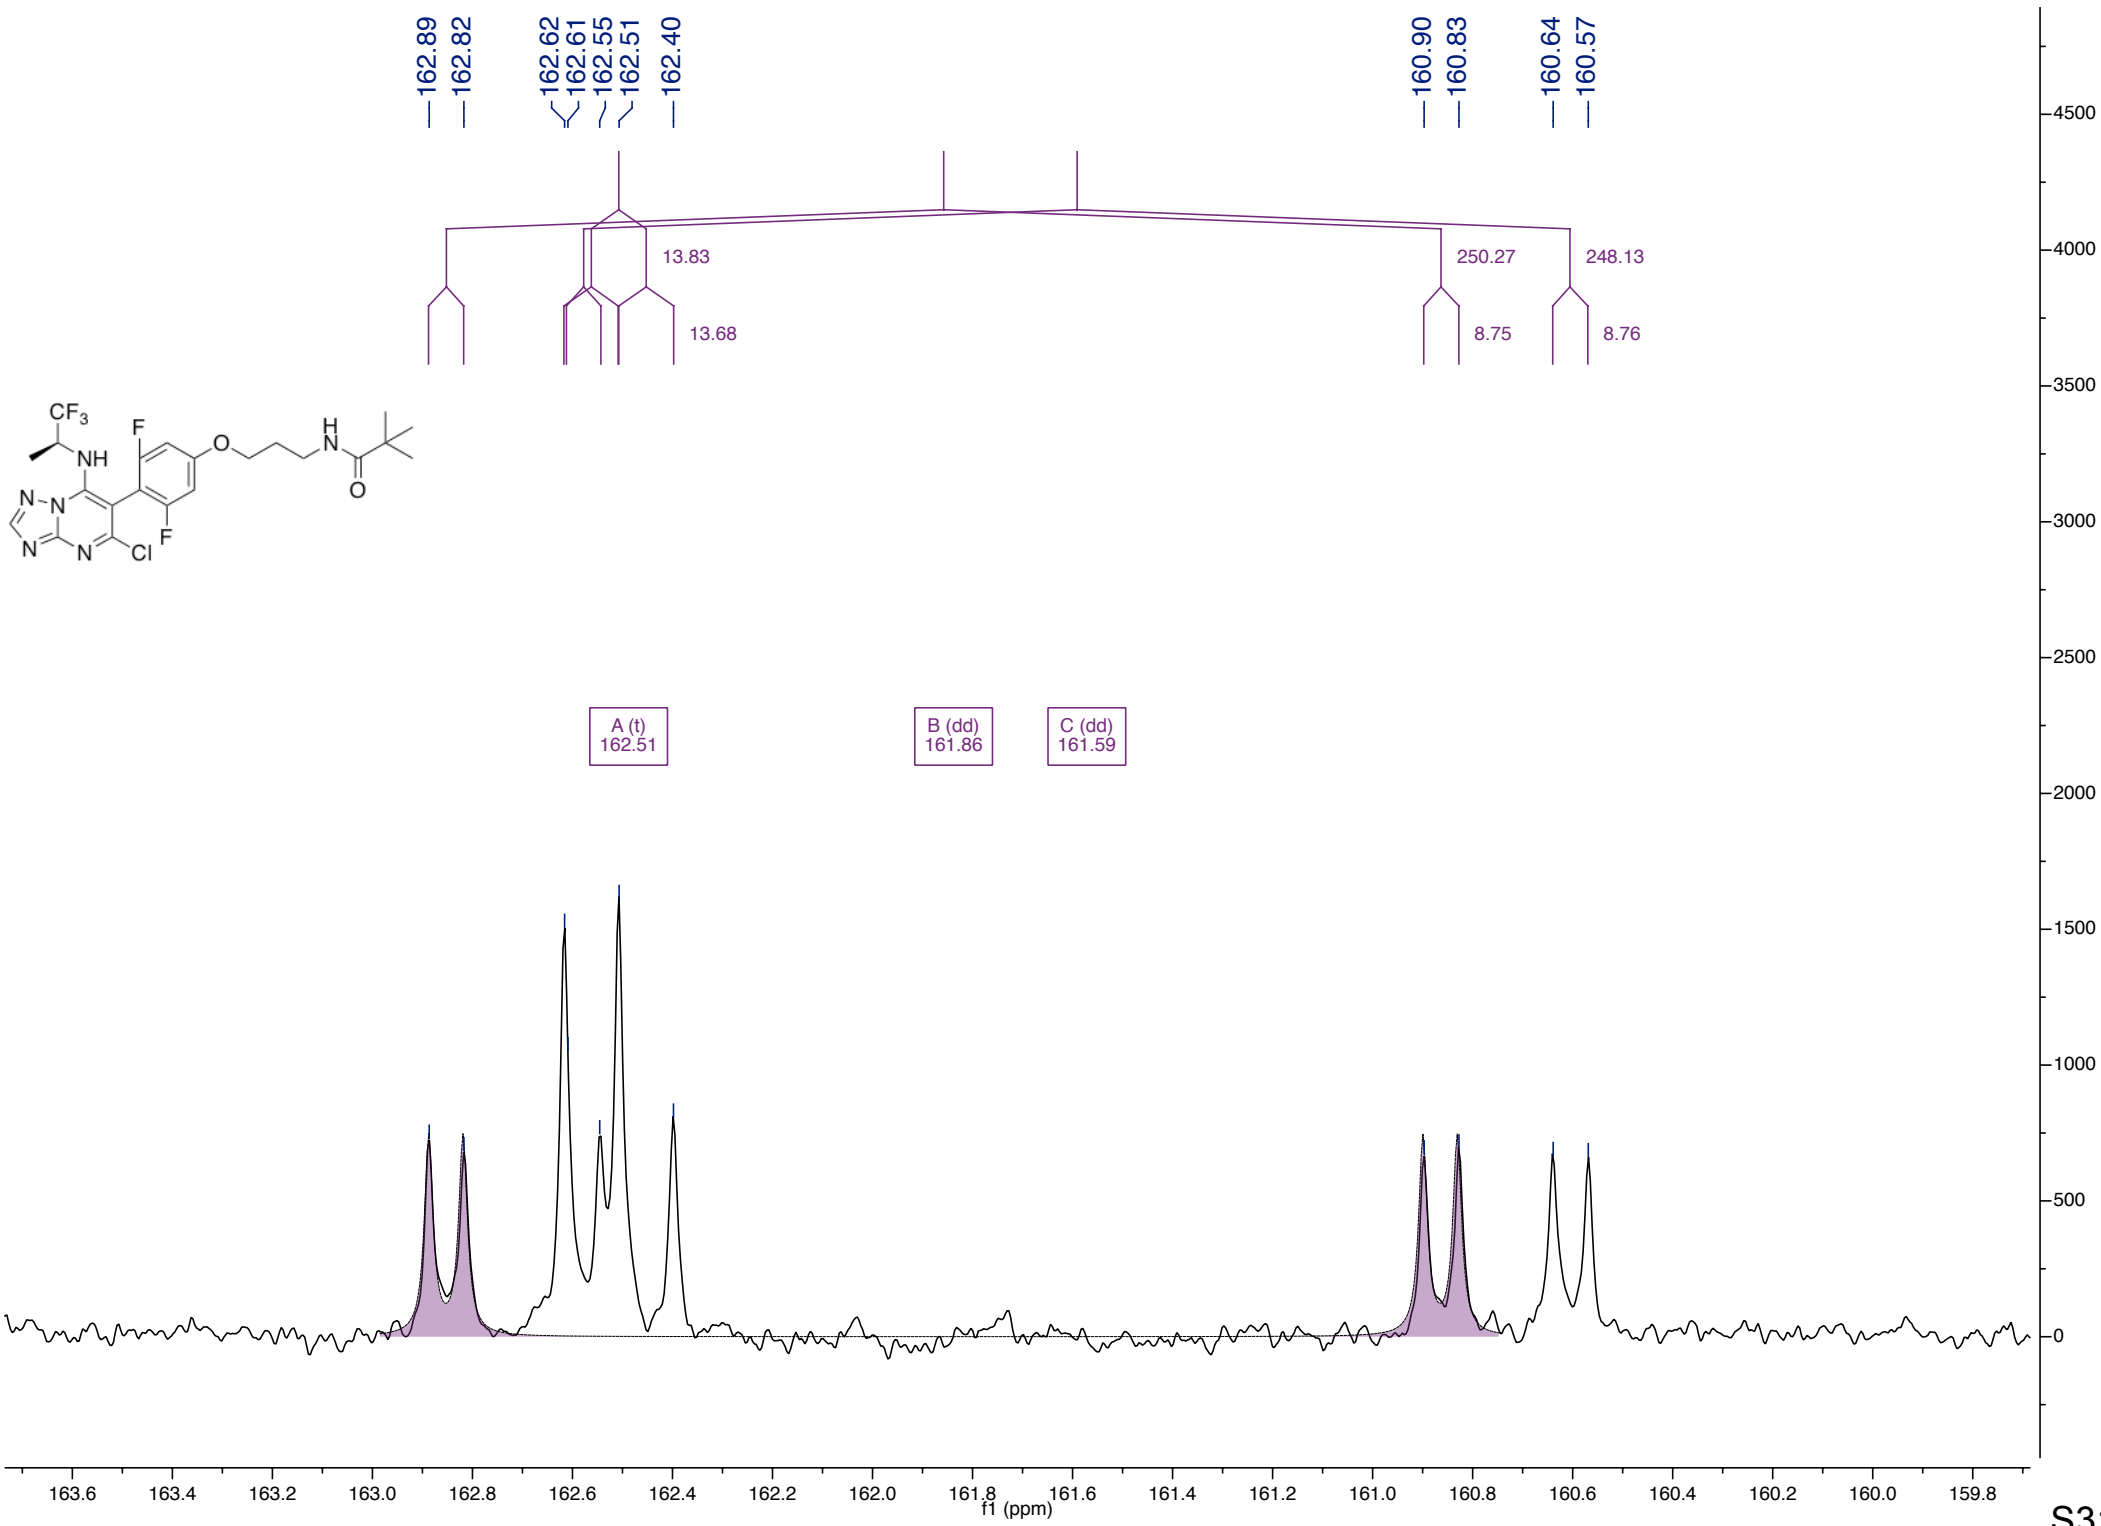

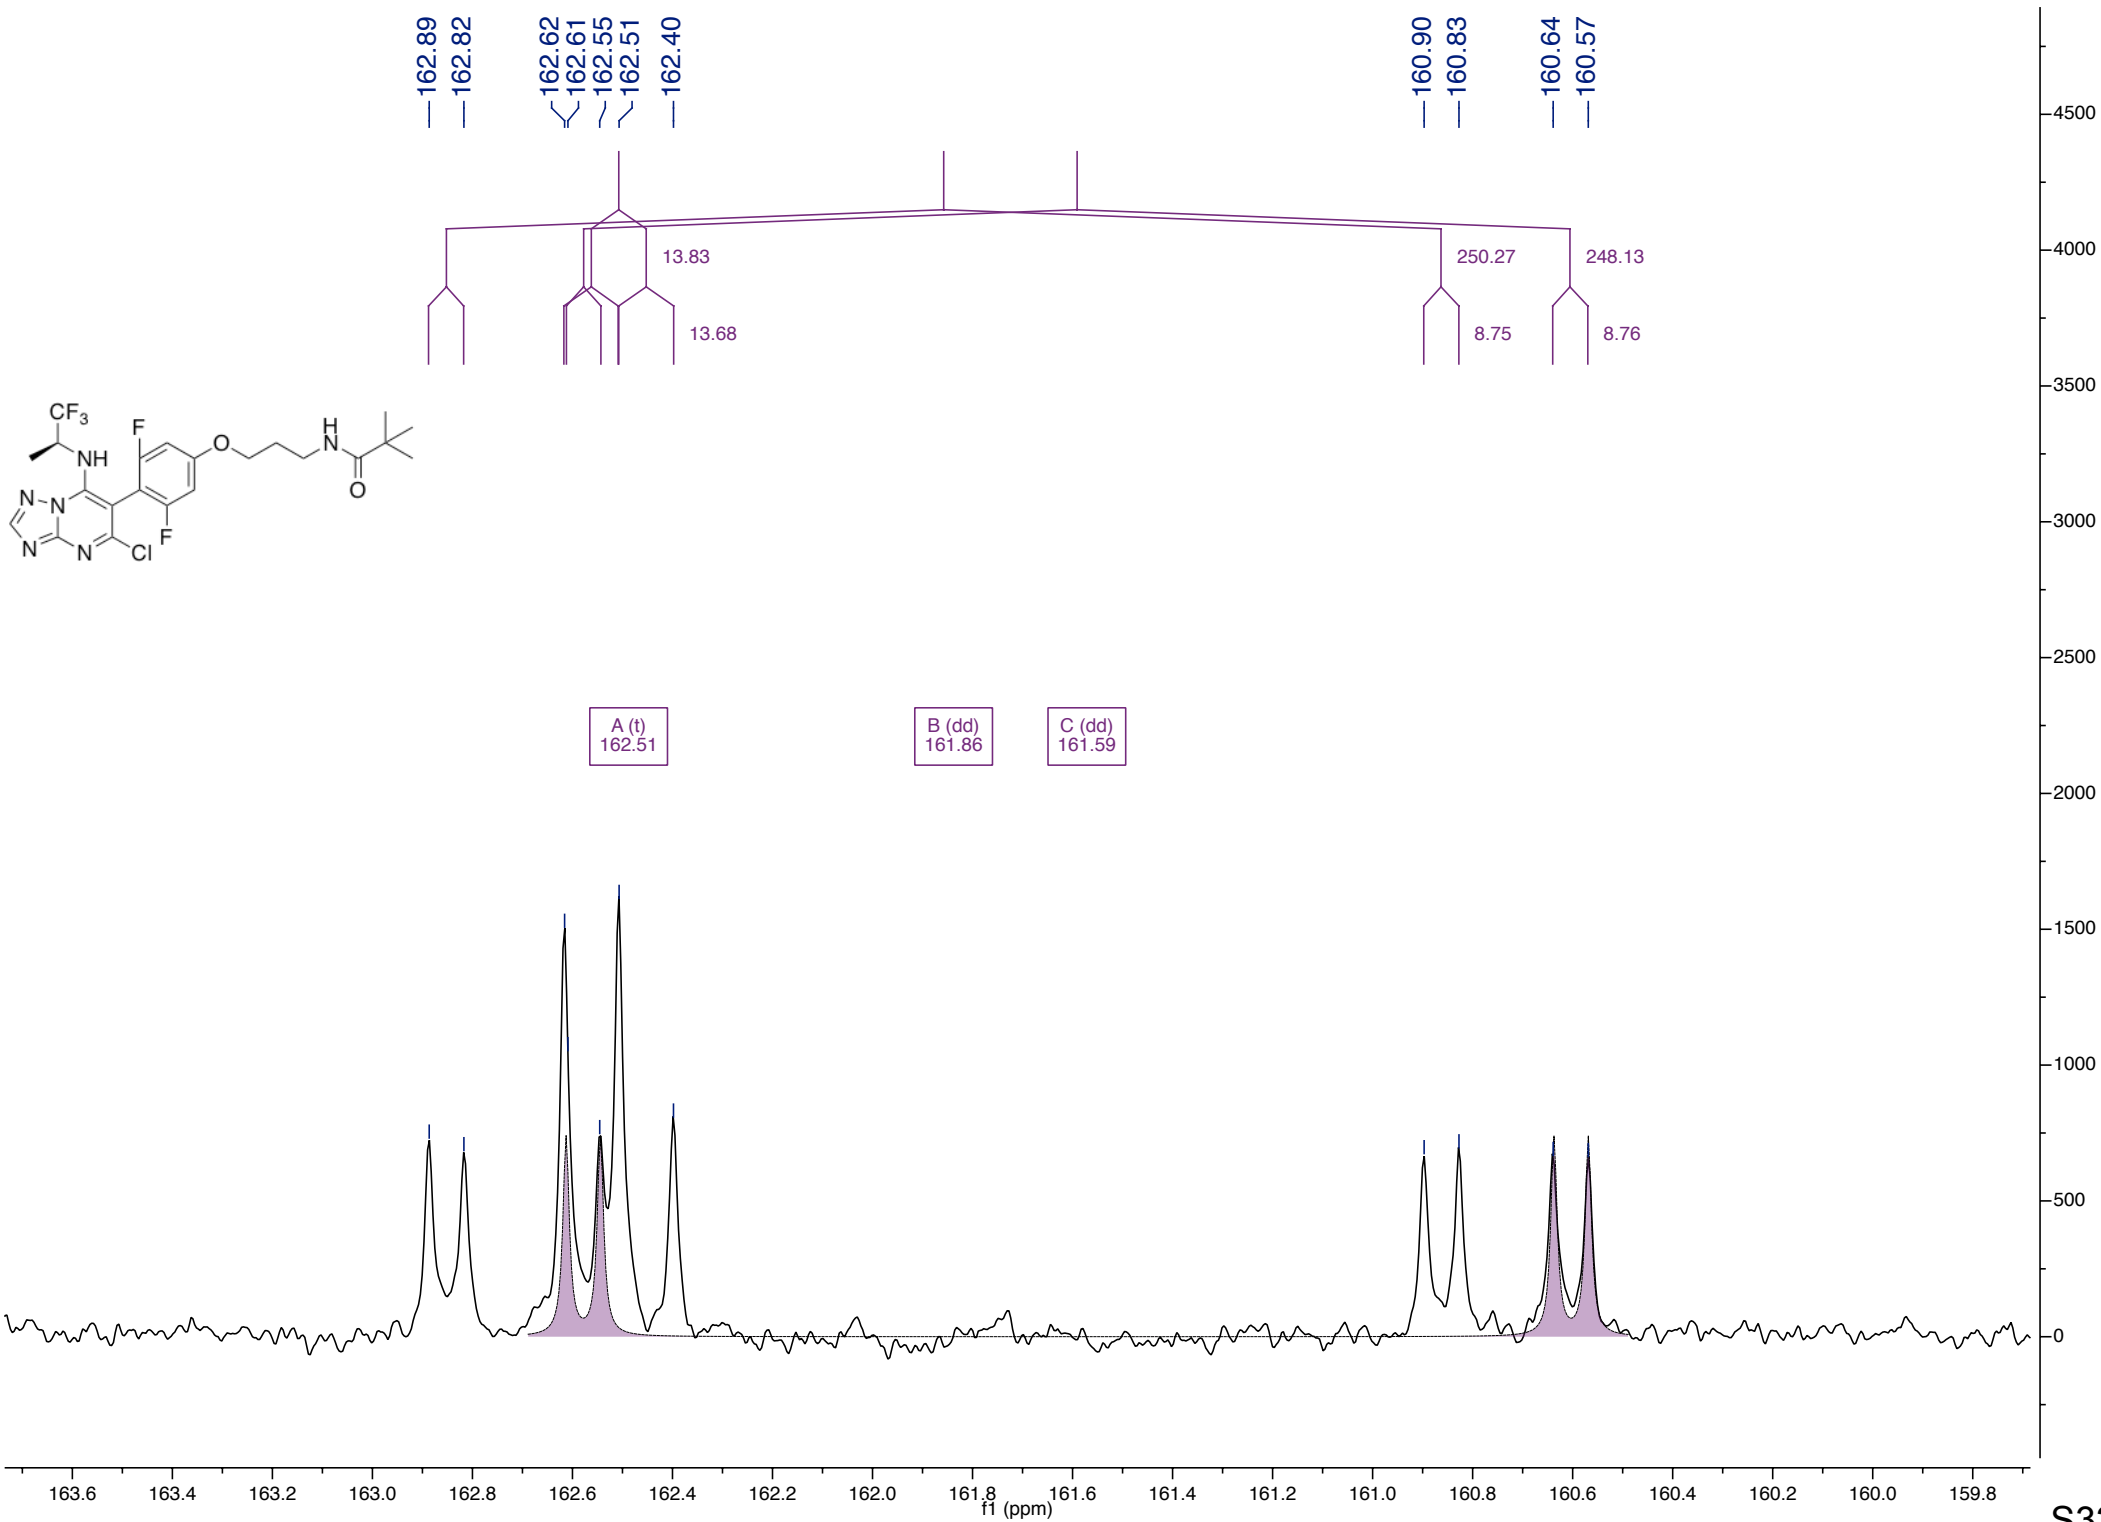



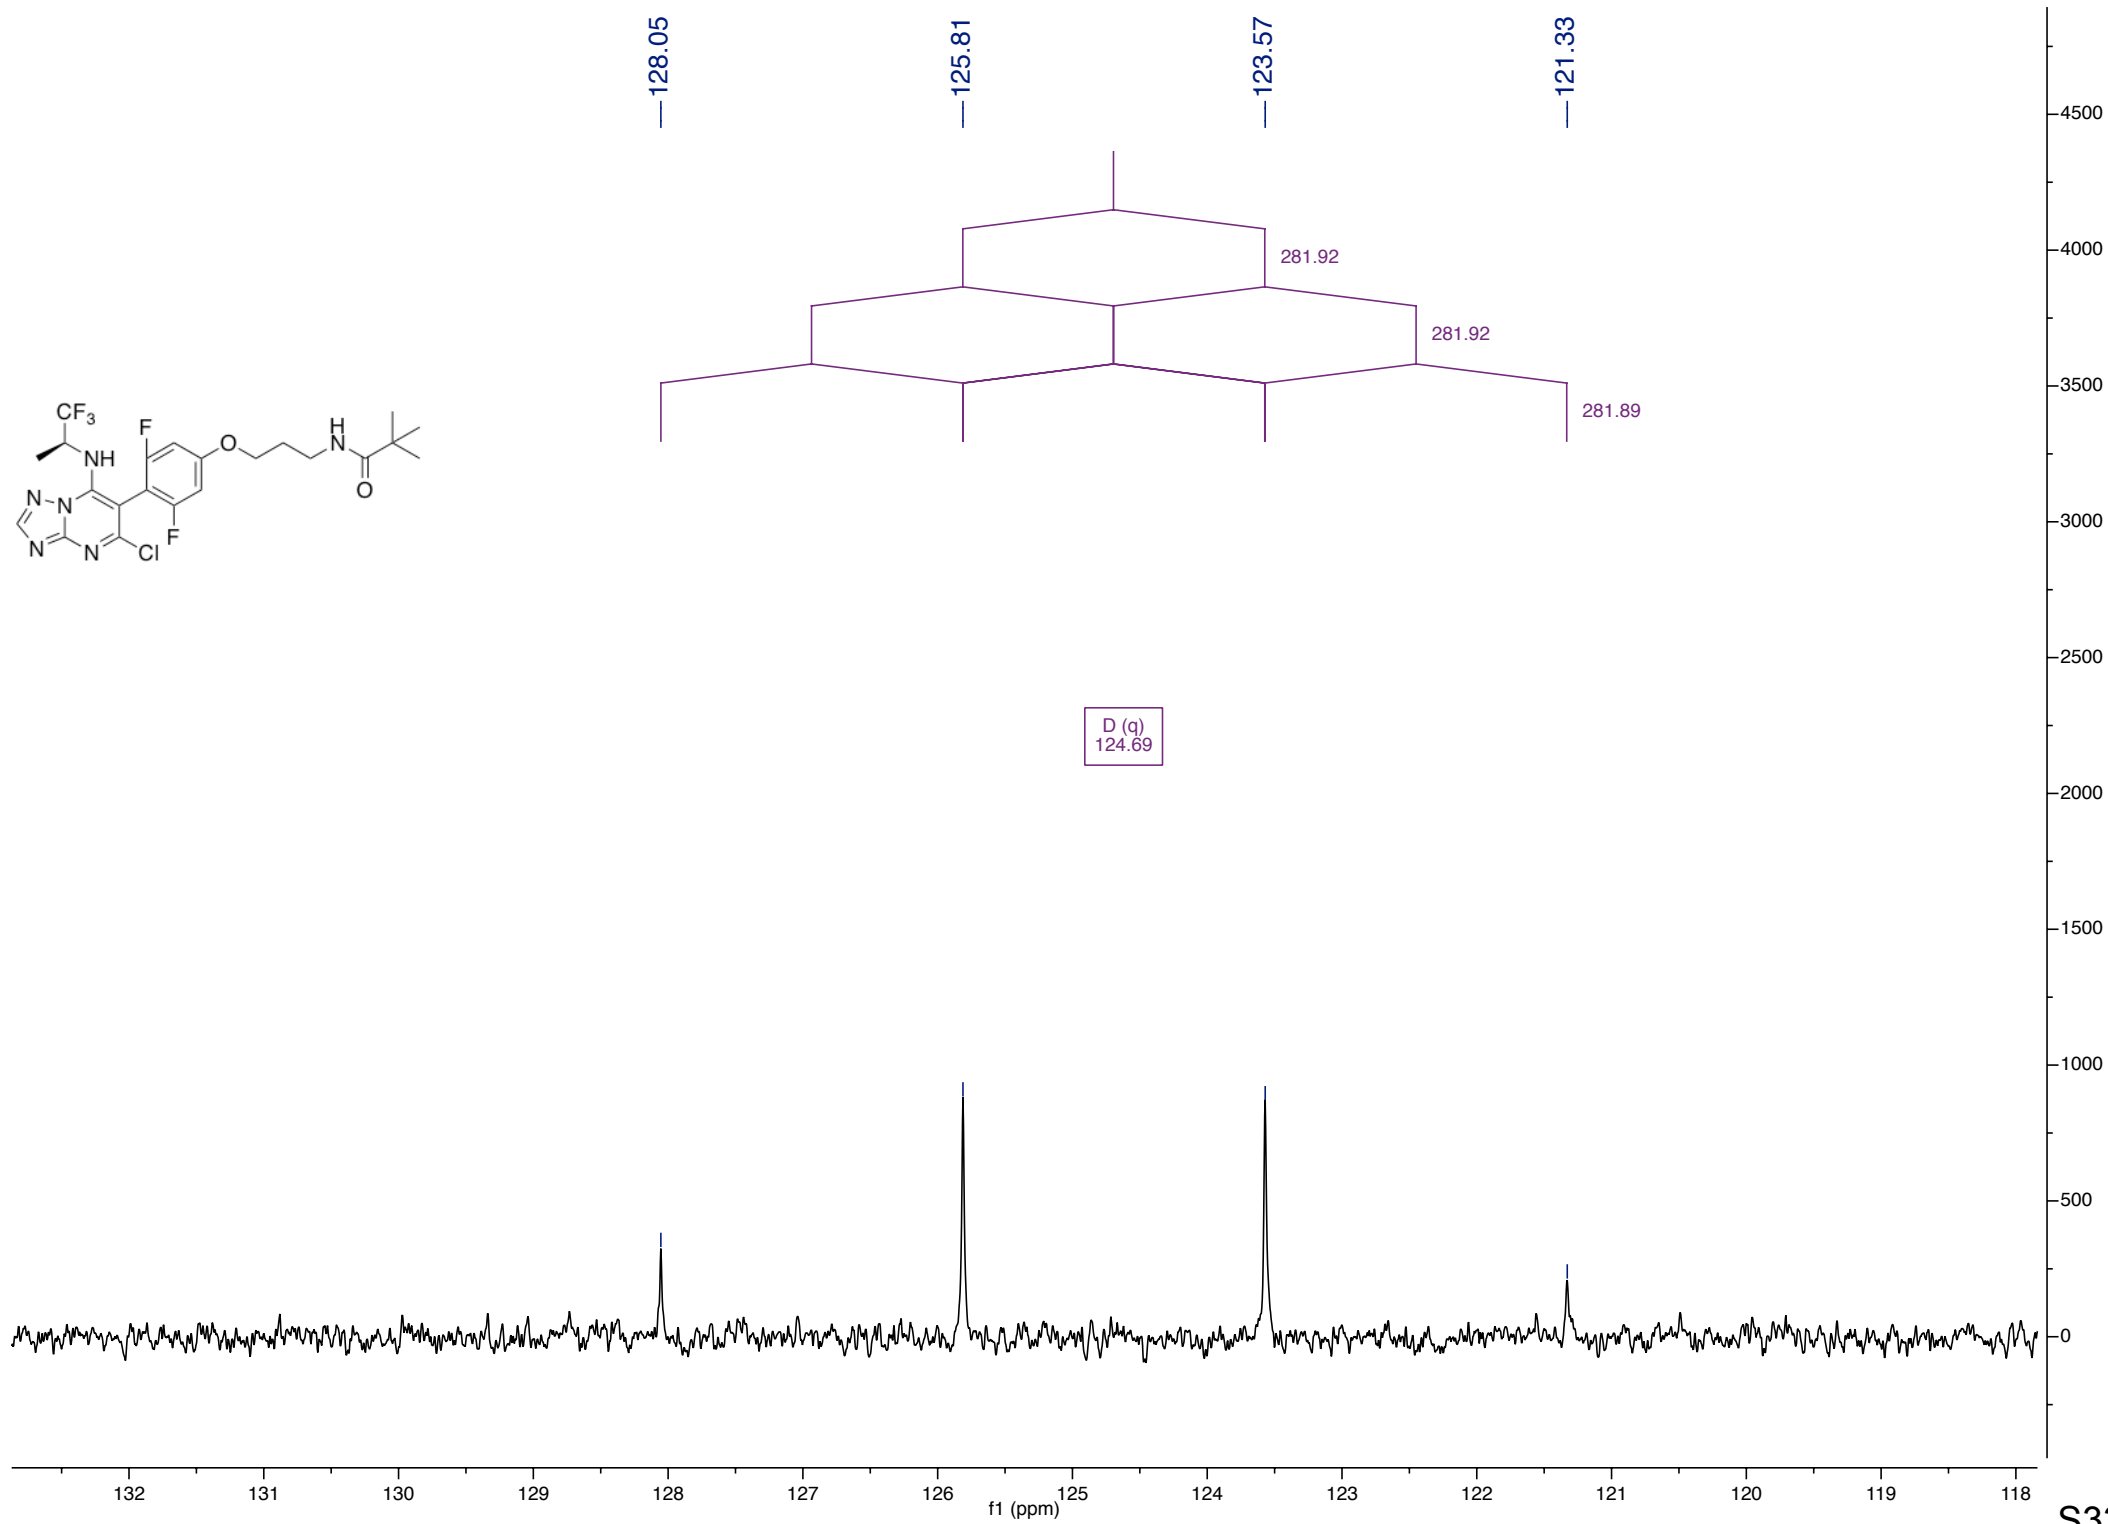

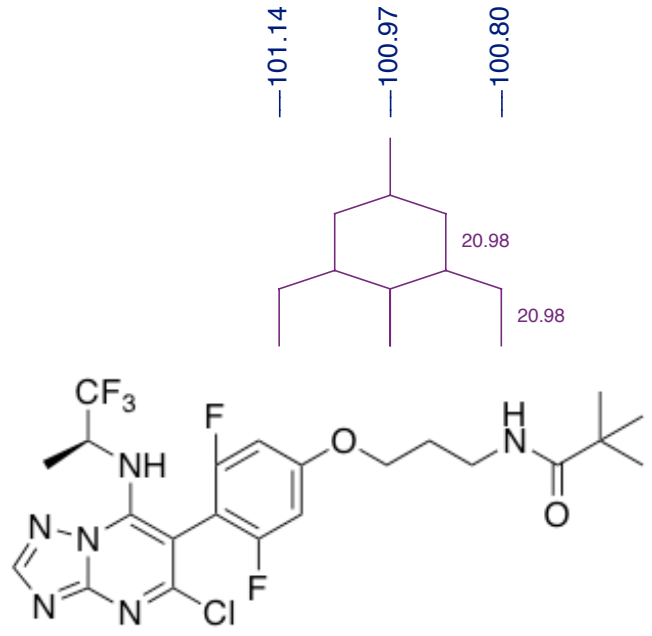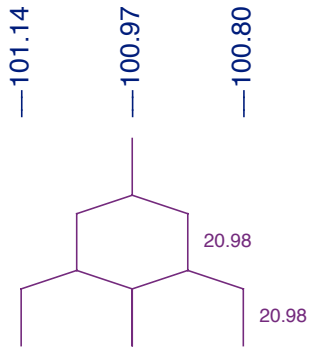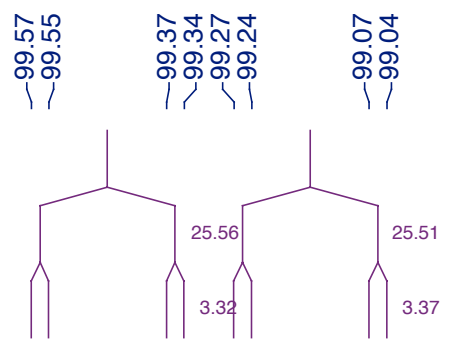

E (t)  
100.97

F (dd)  
99.46

G (dd)  
99.15

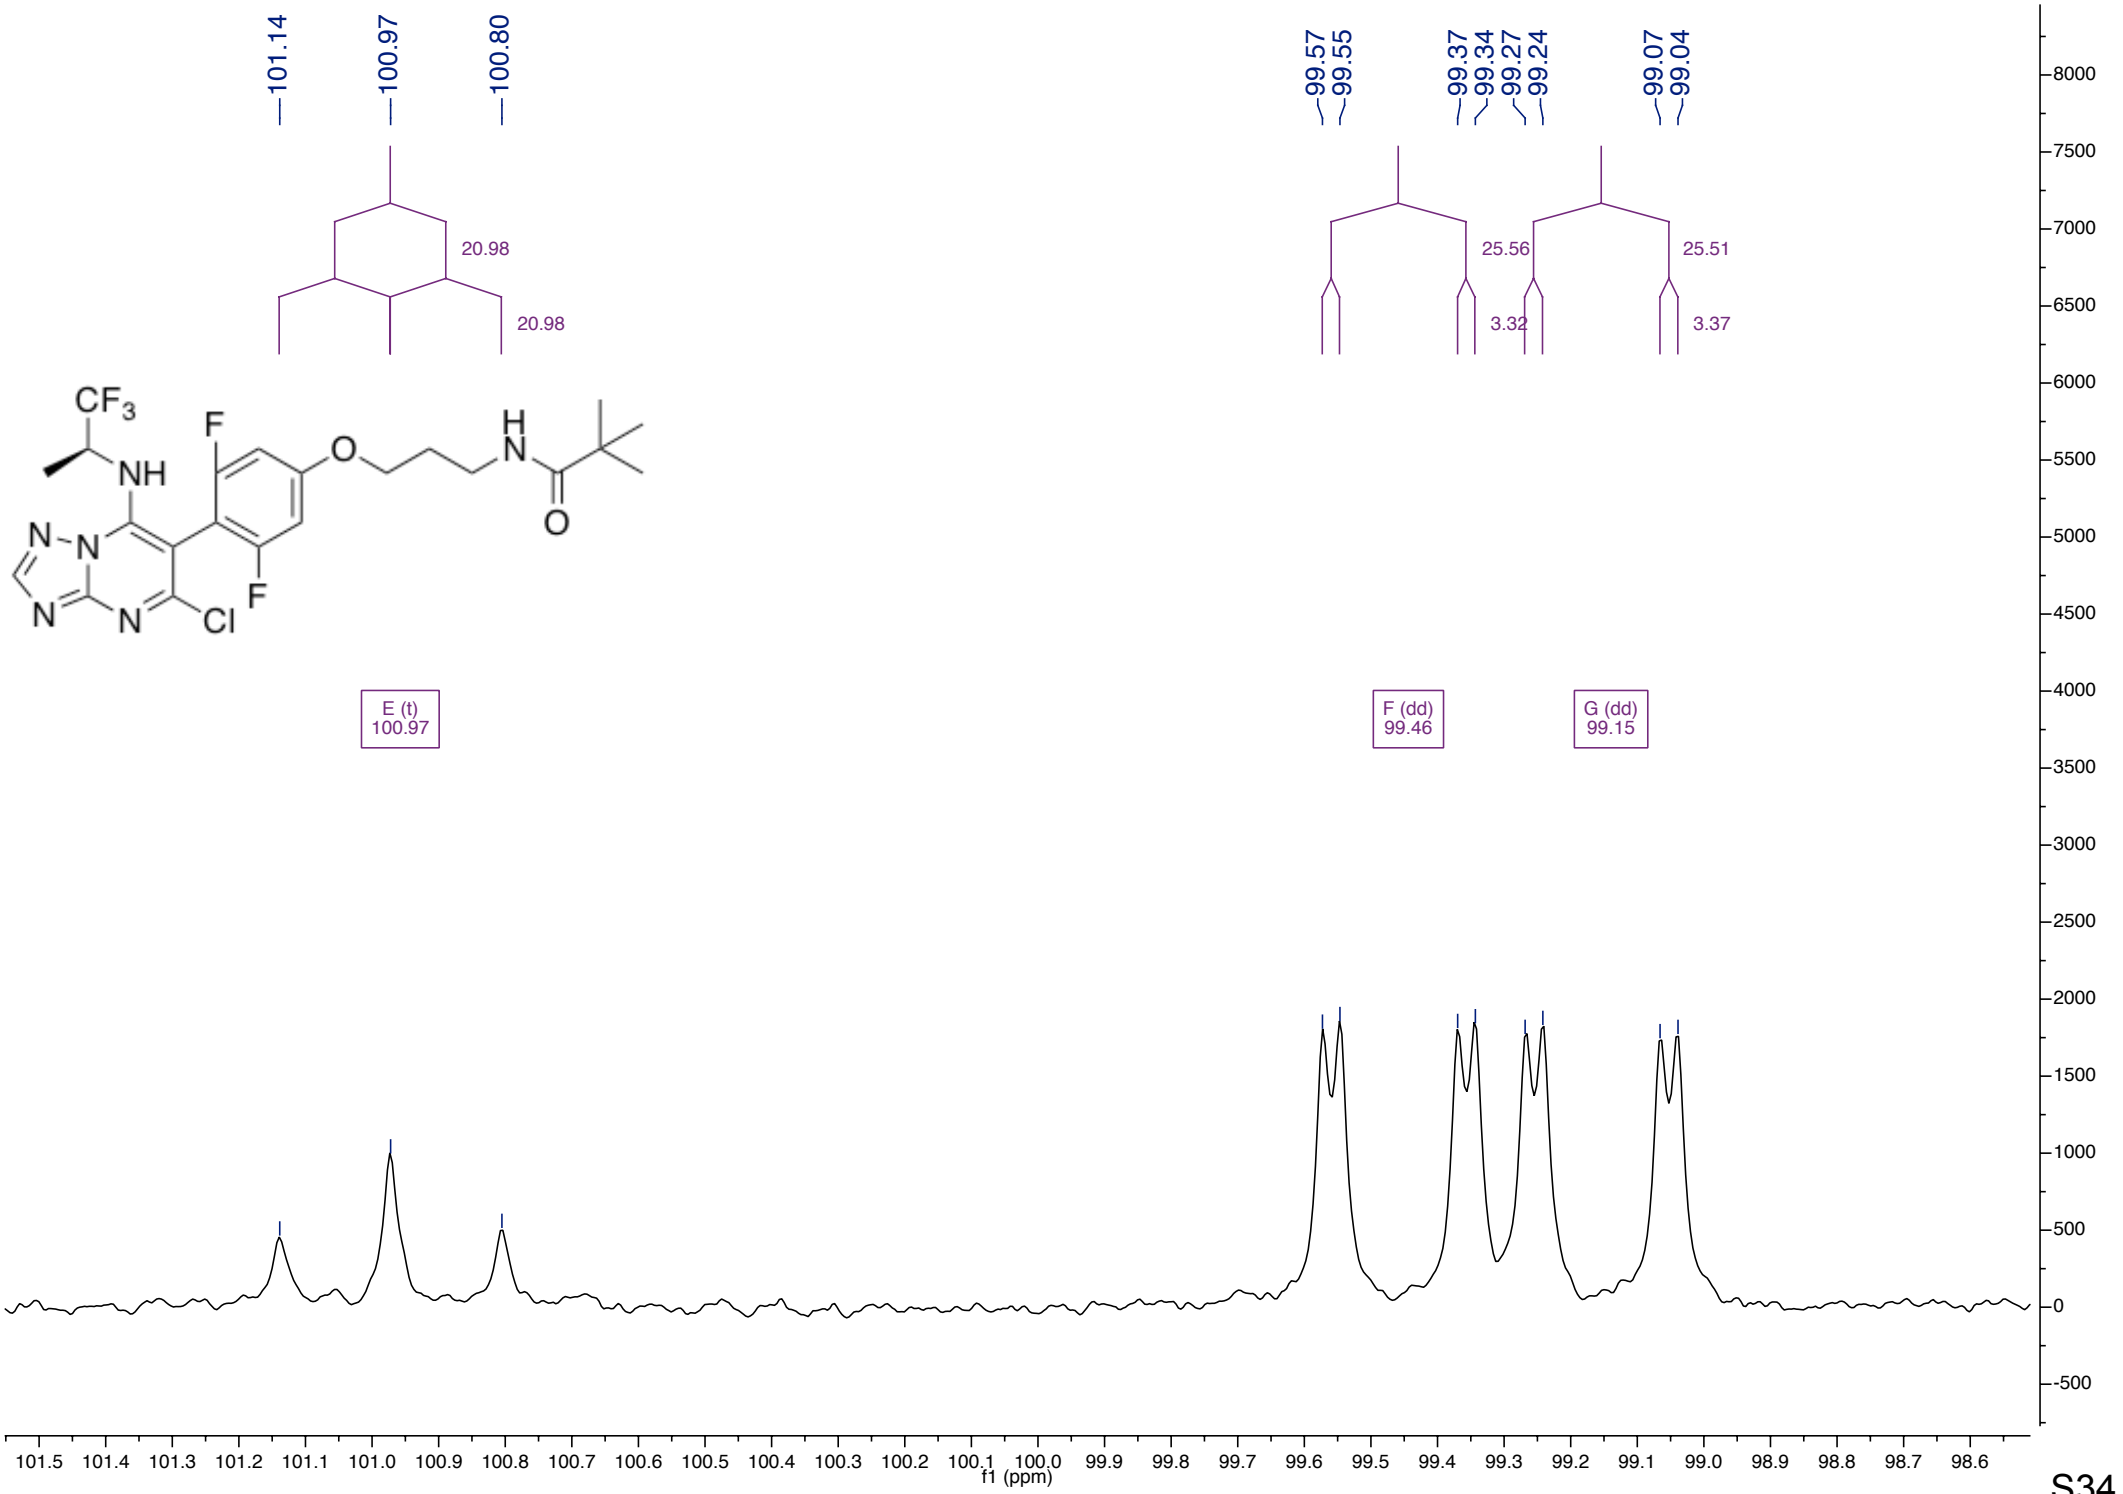

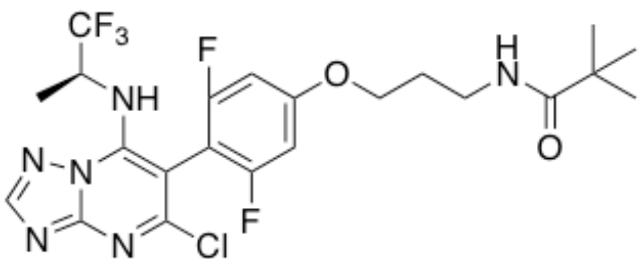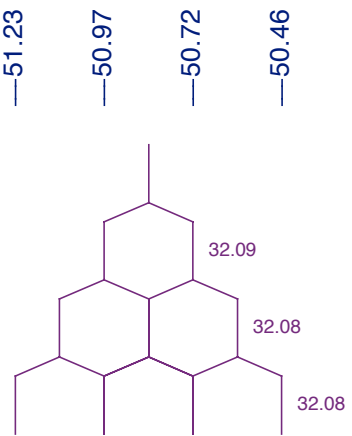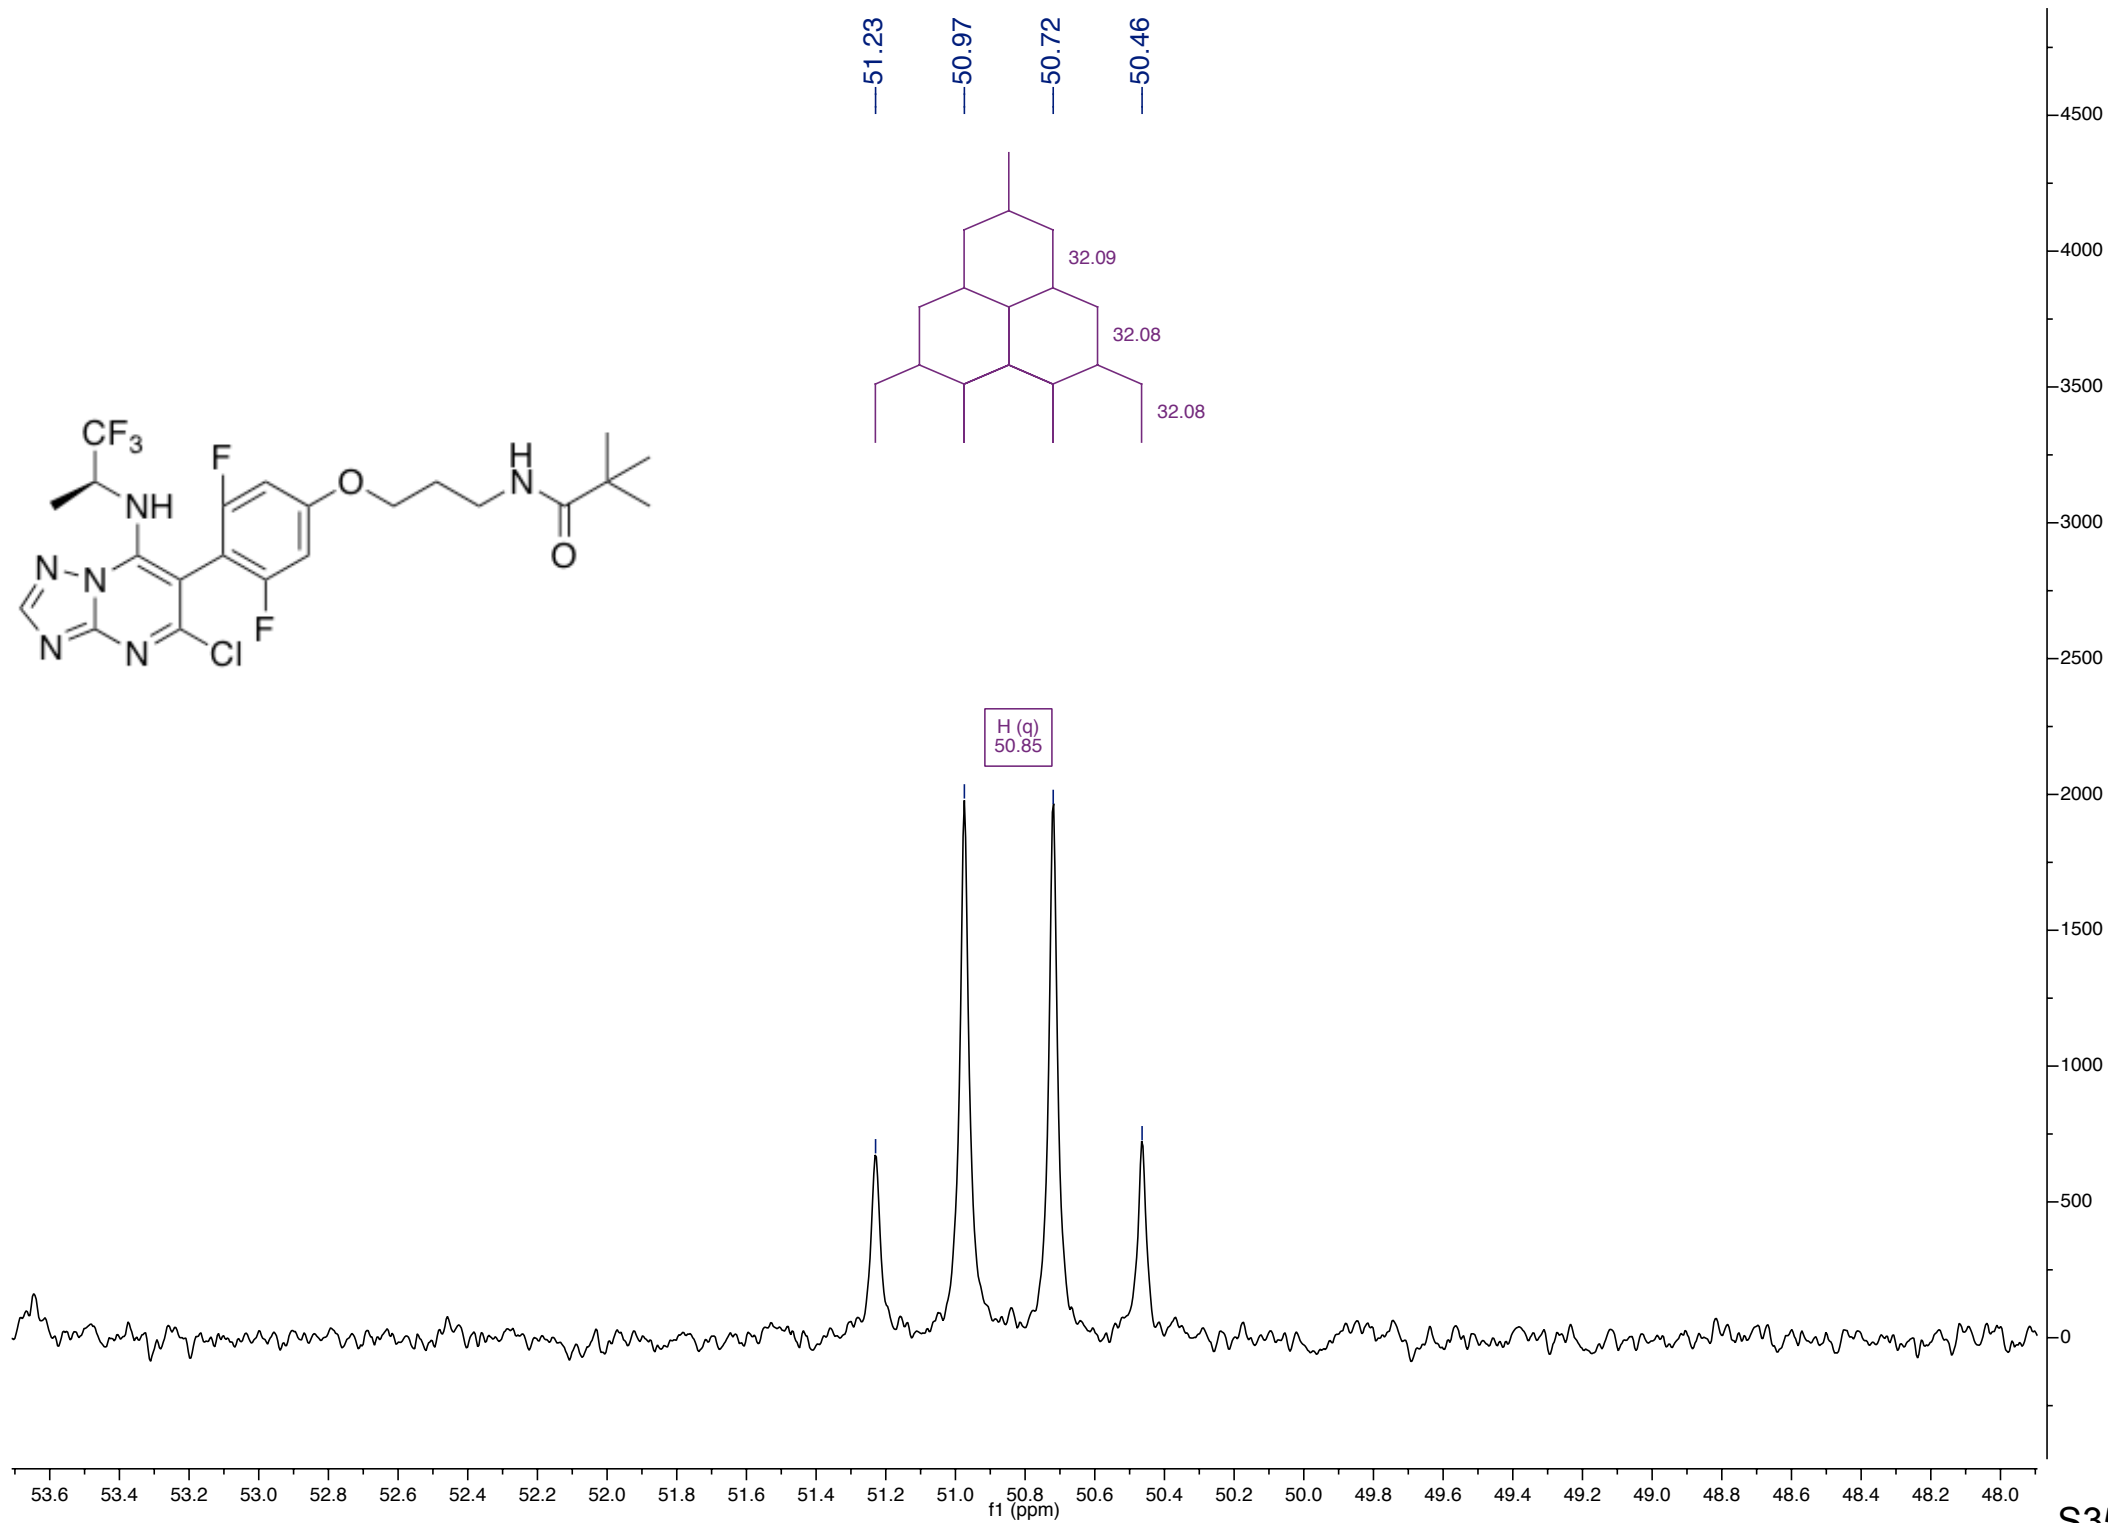

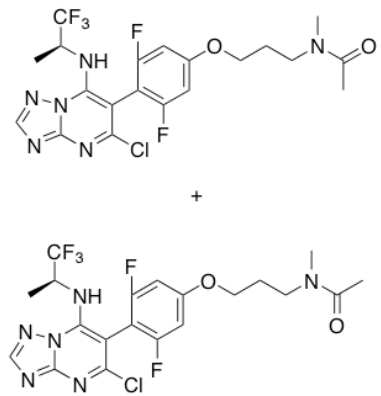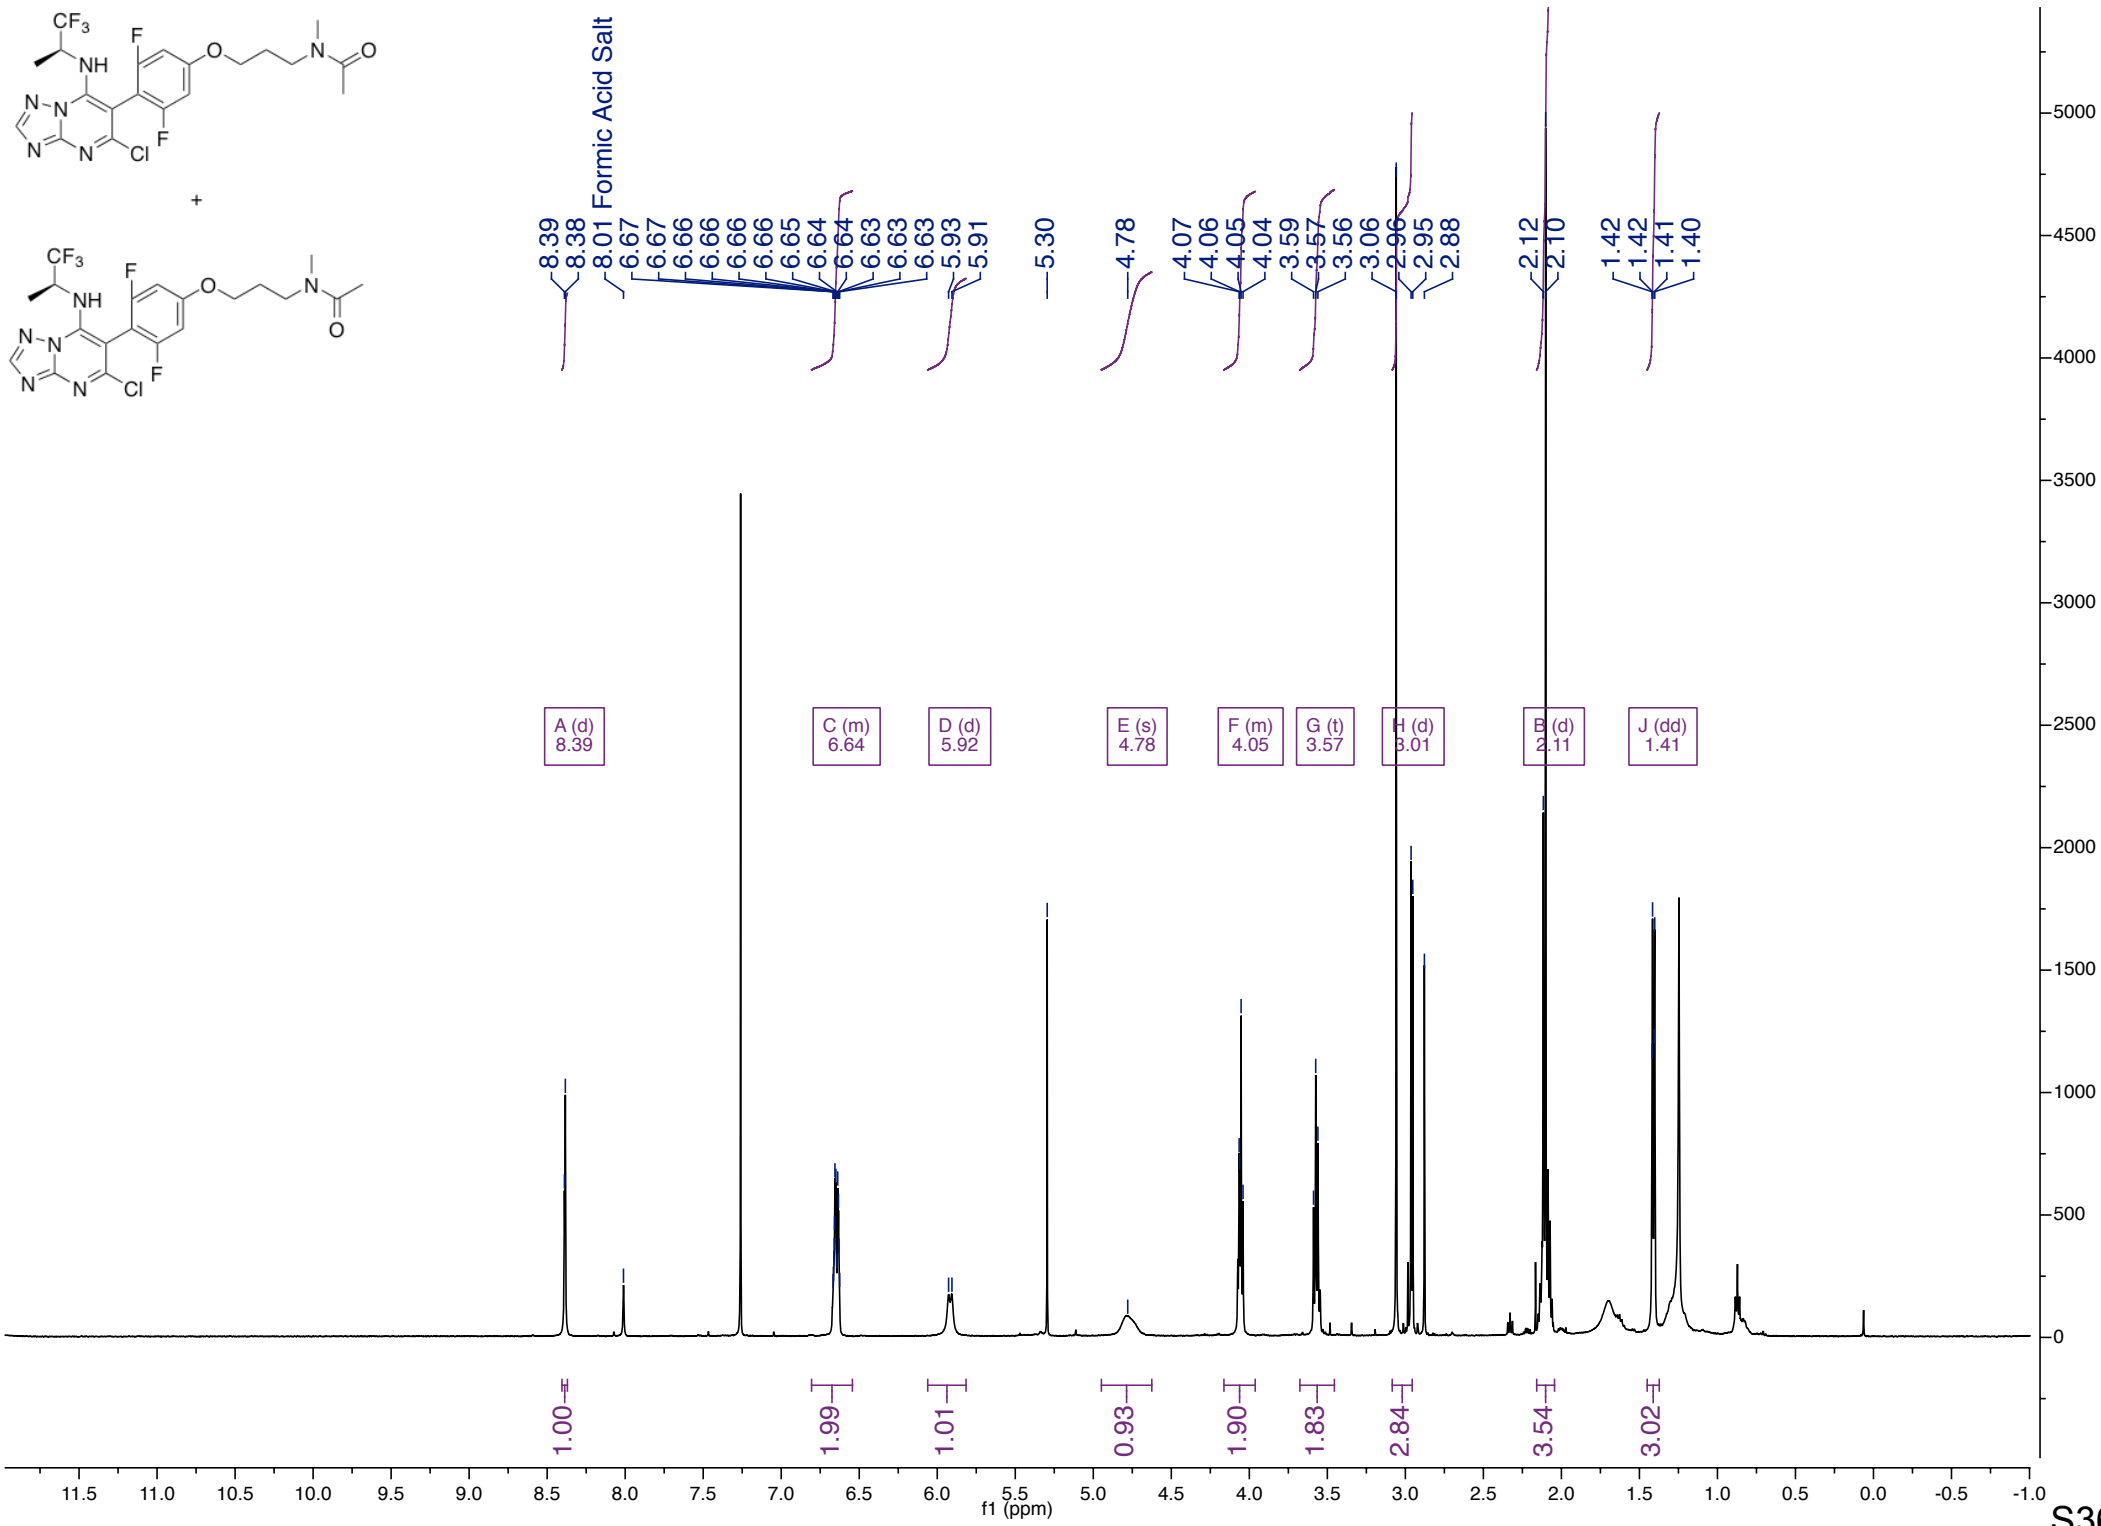

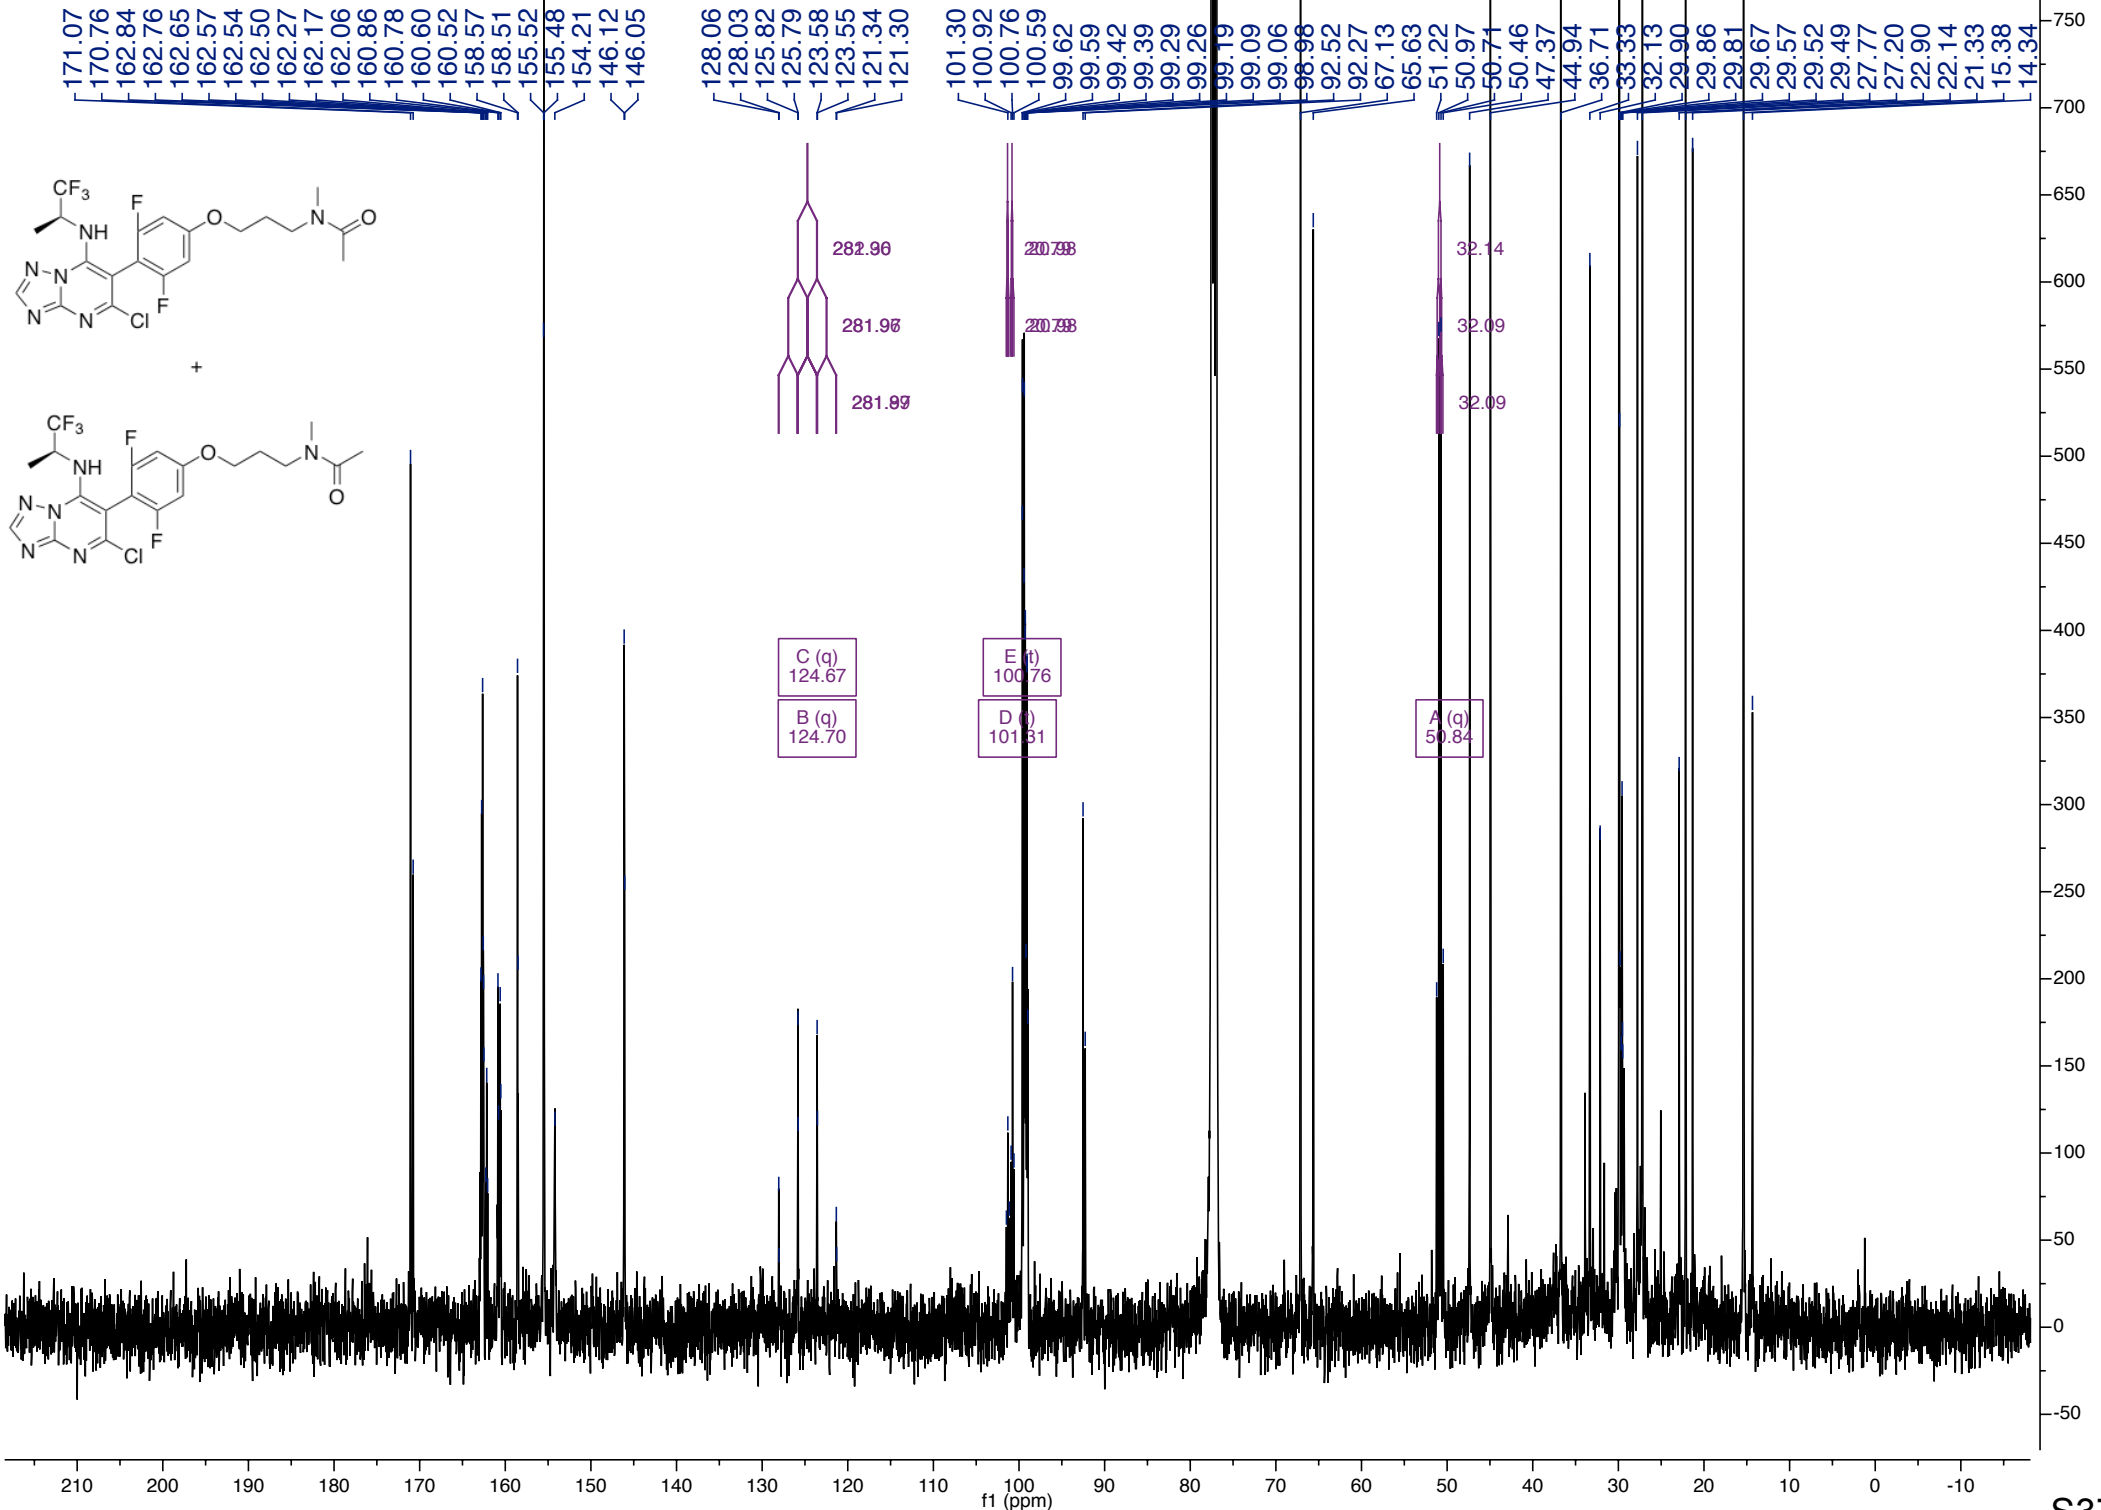

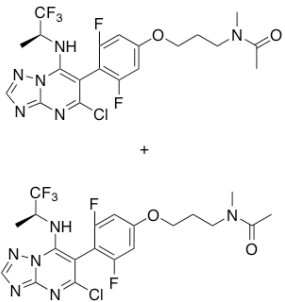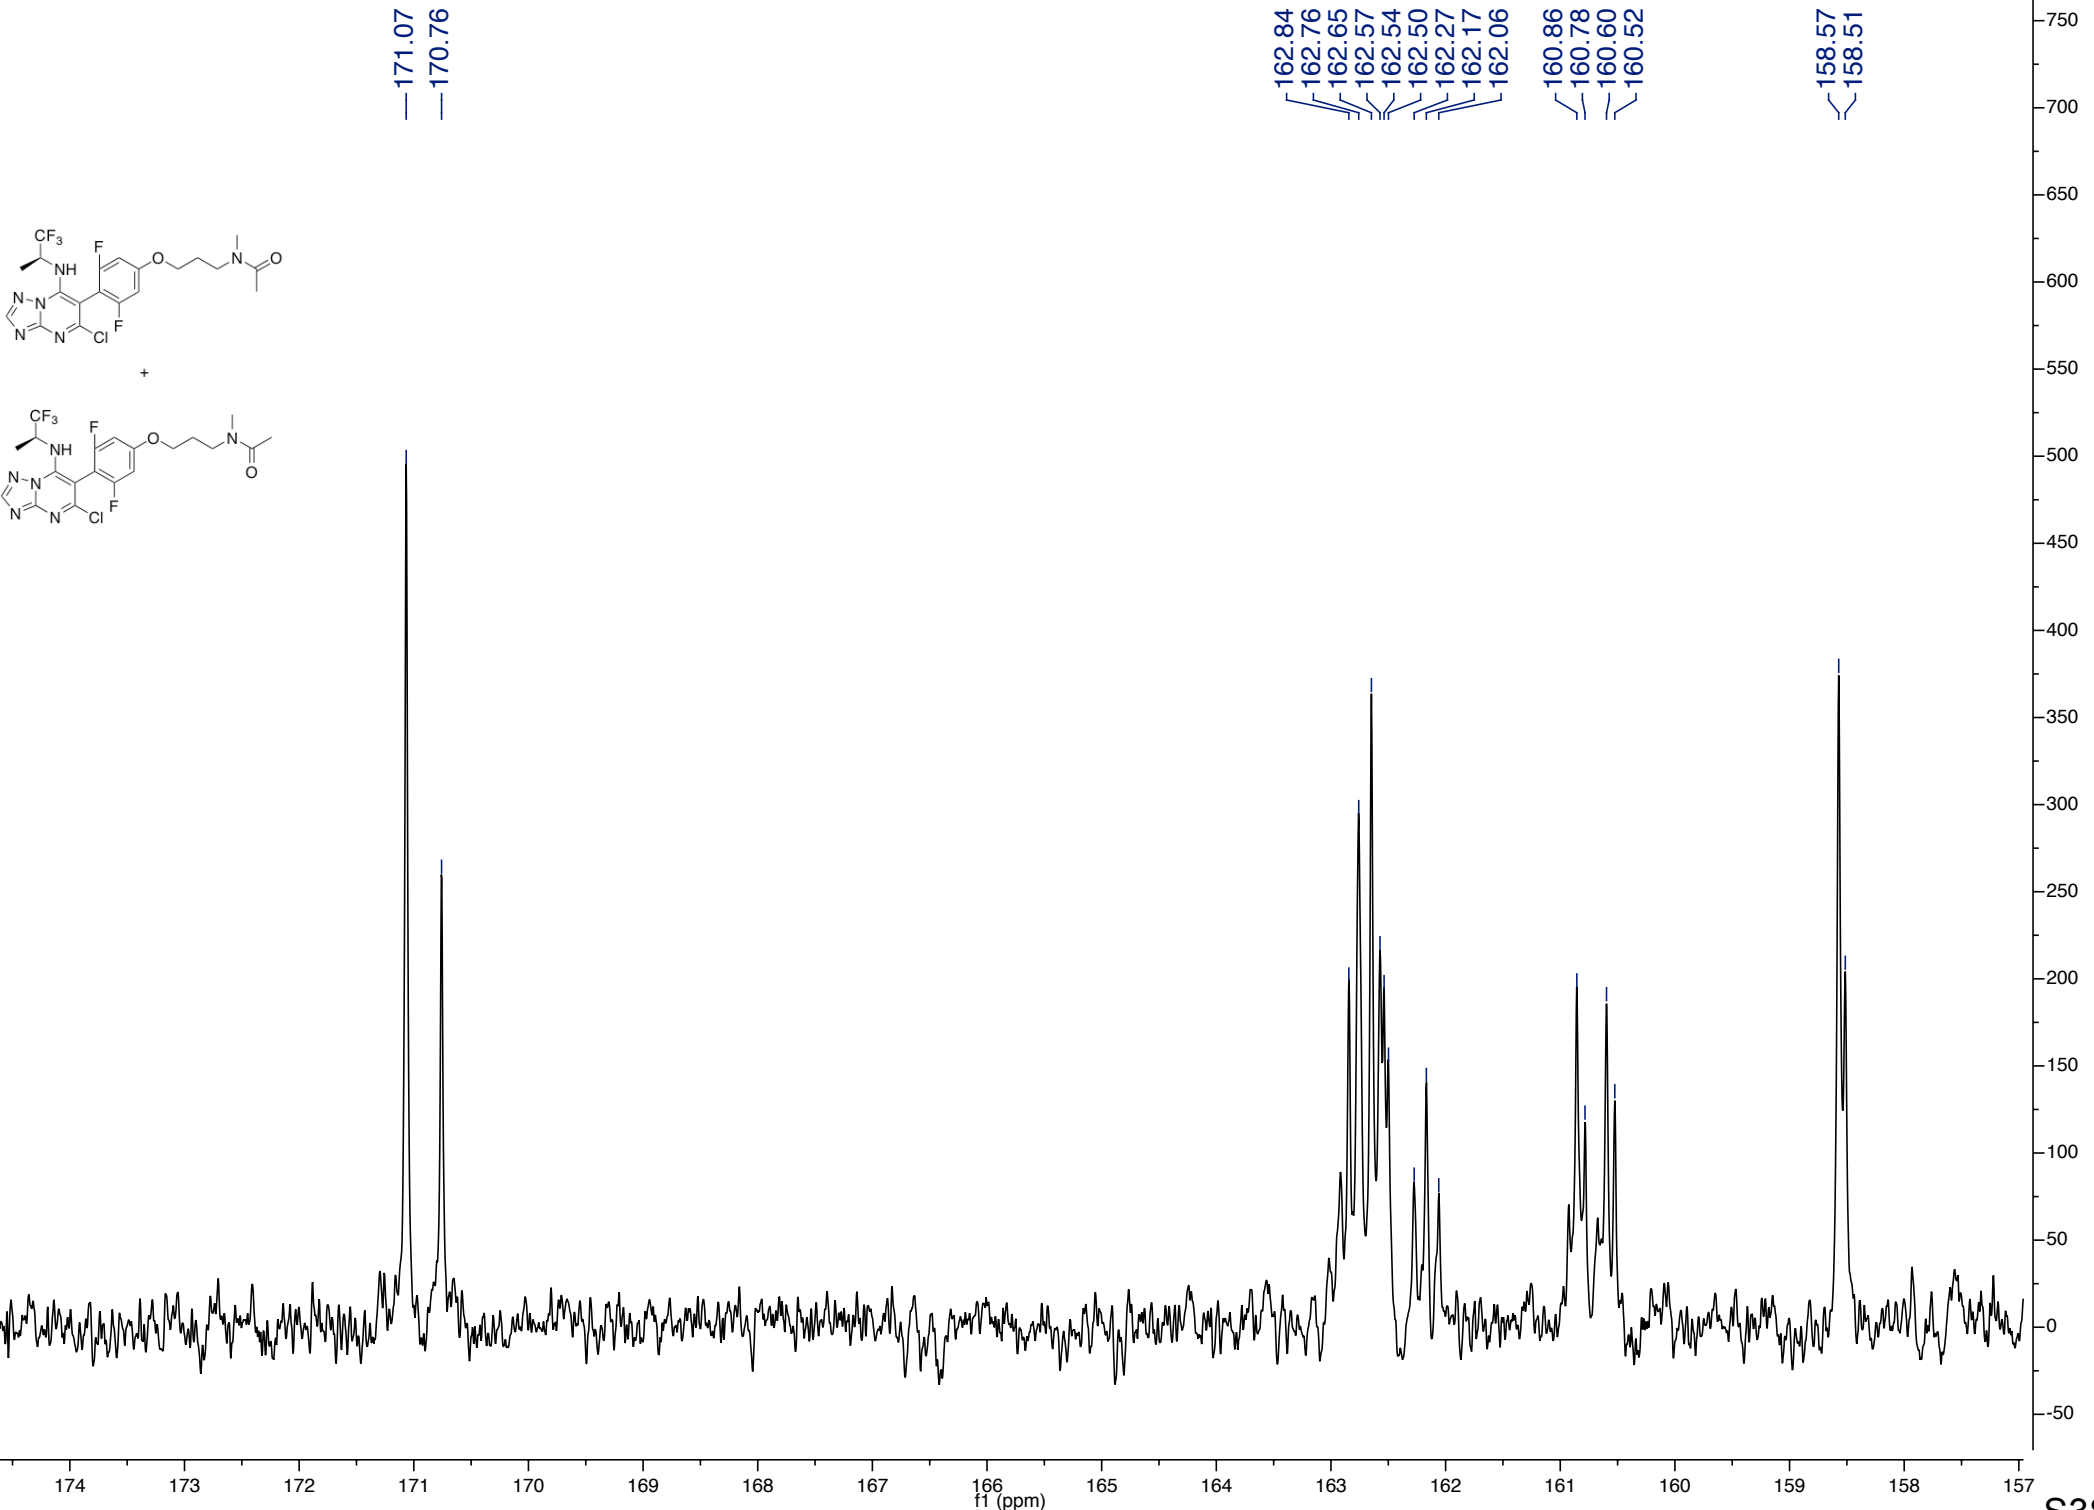

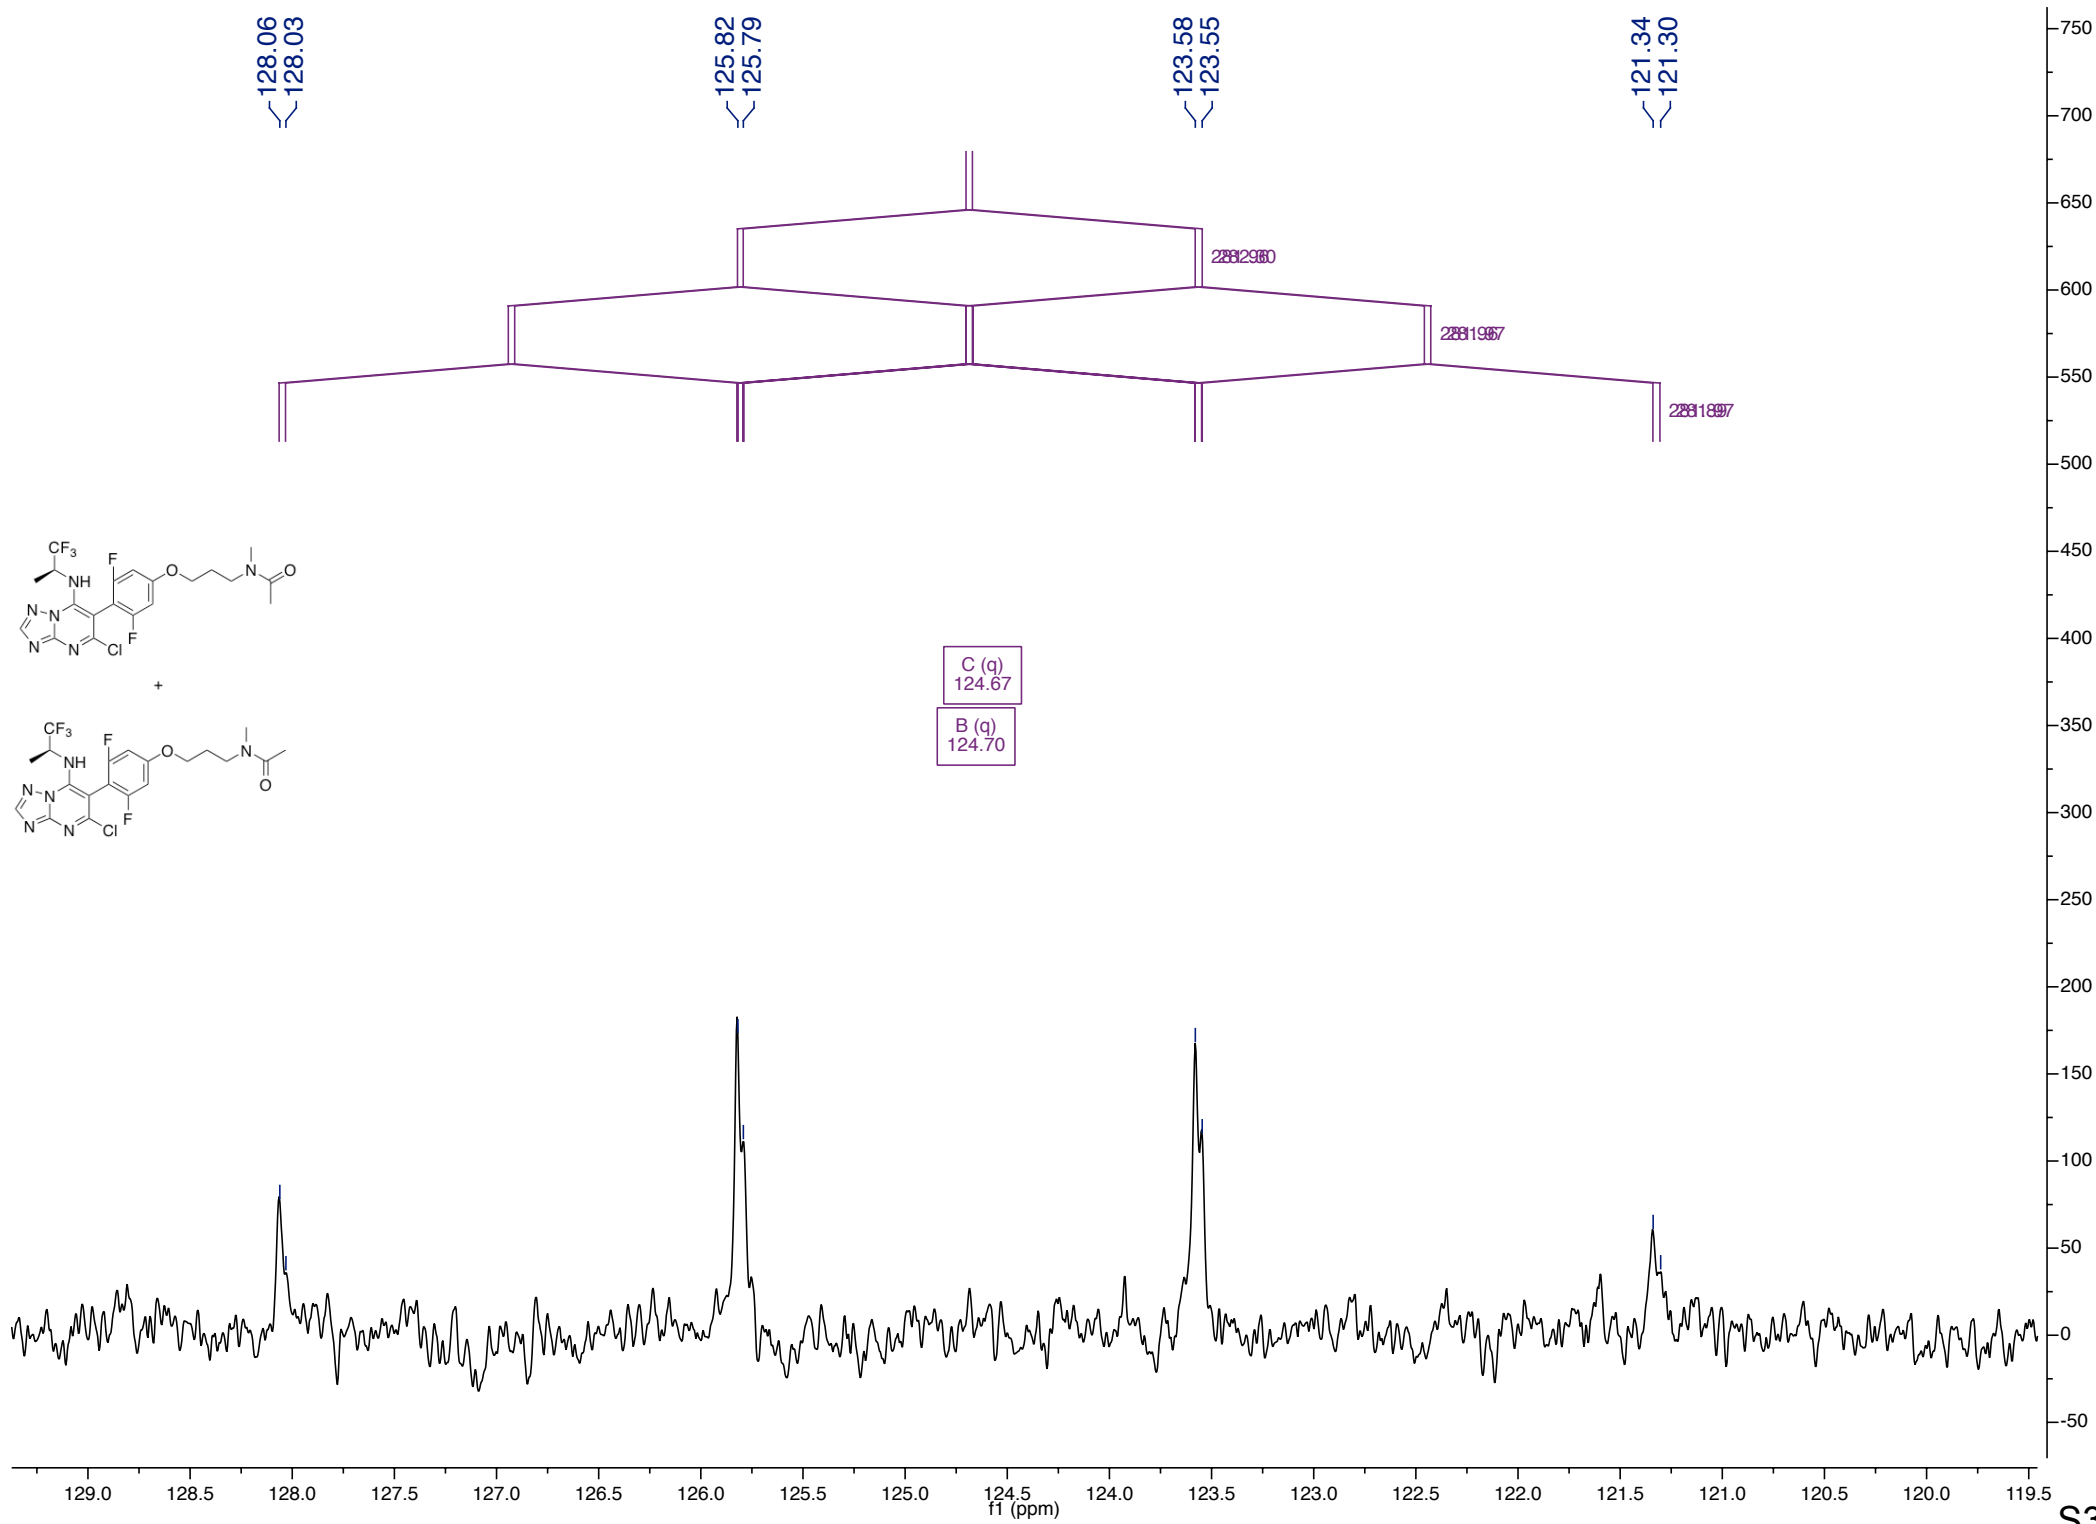

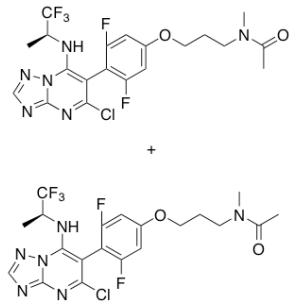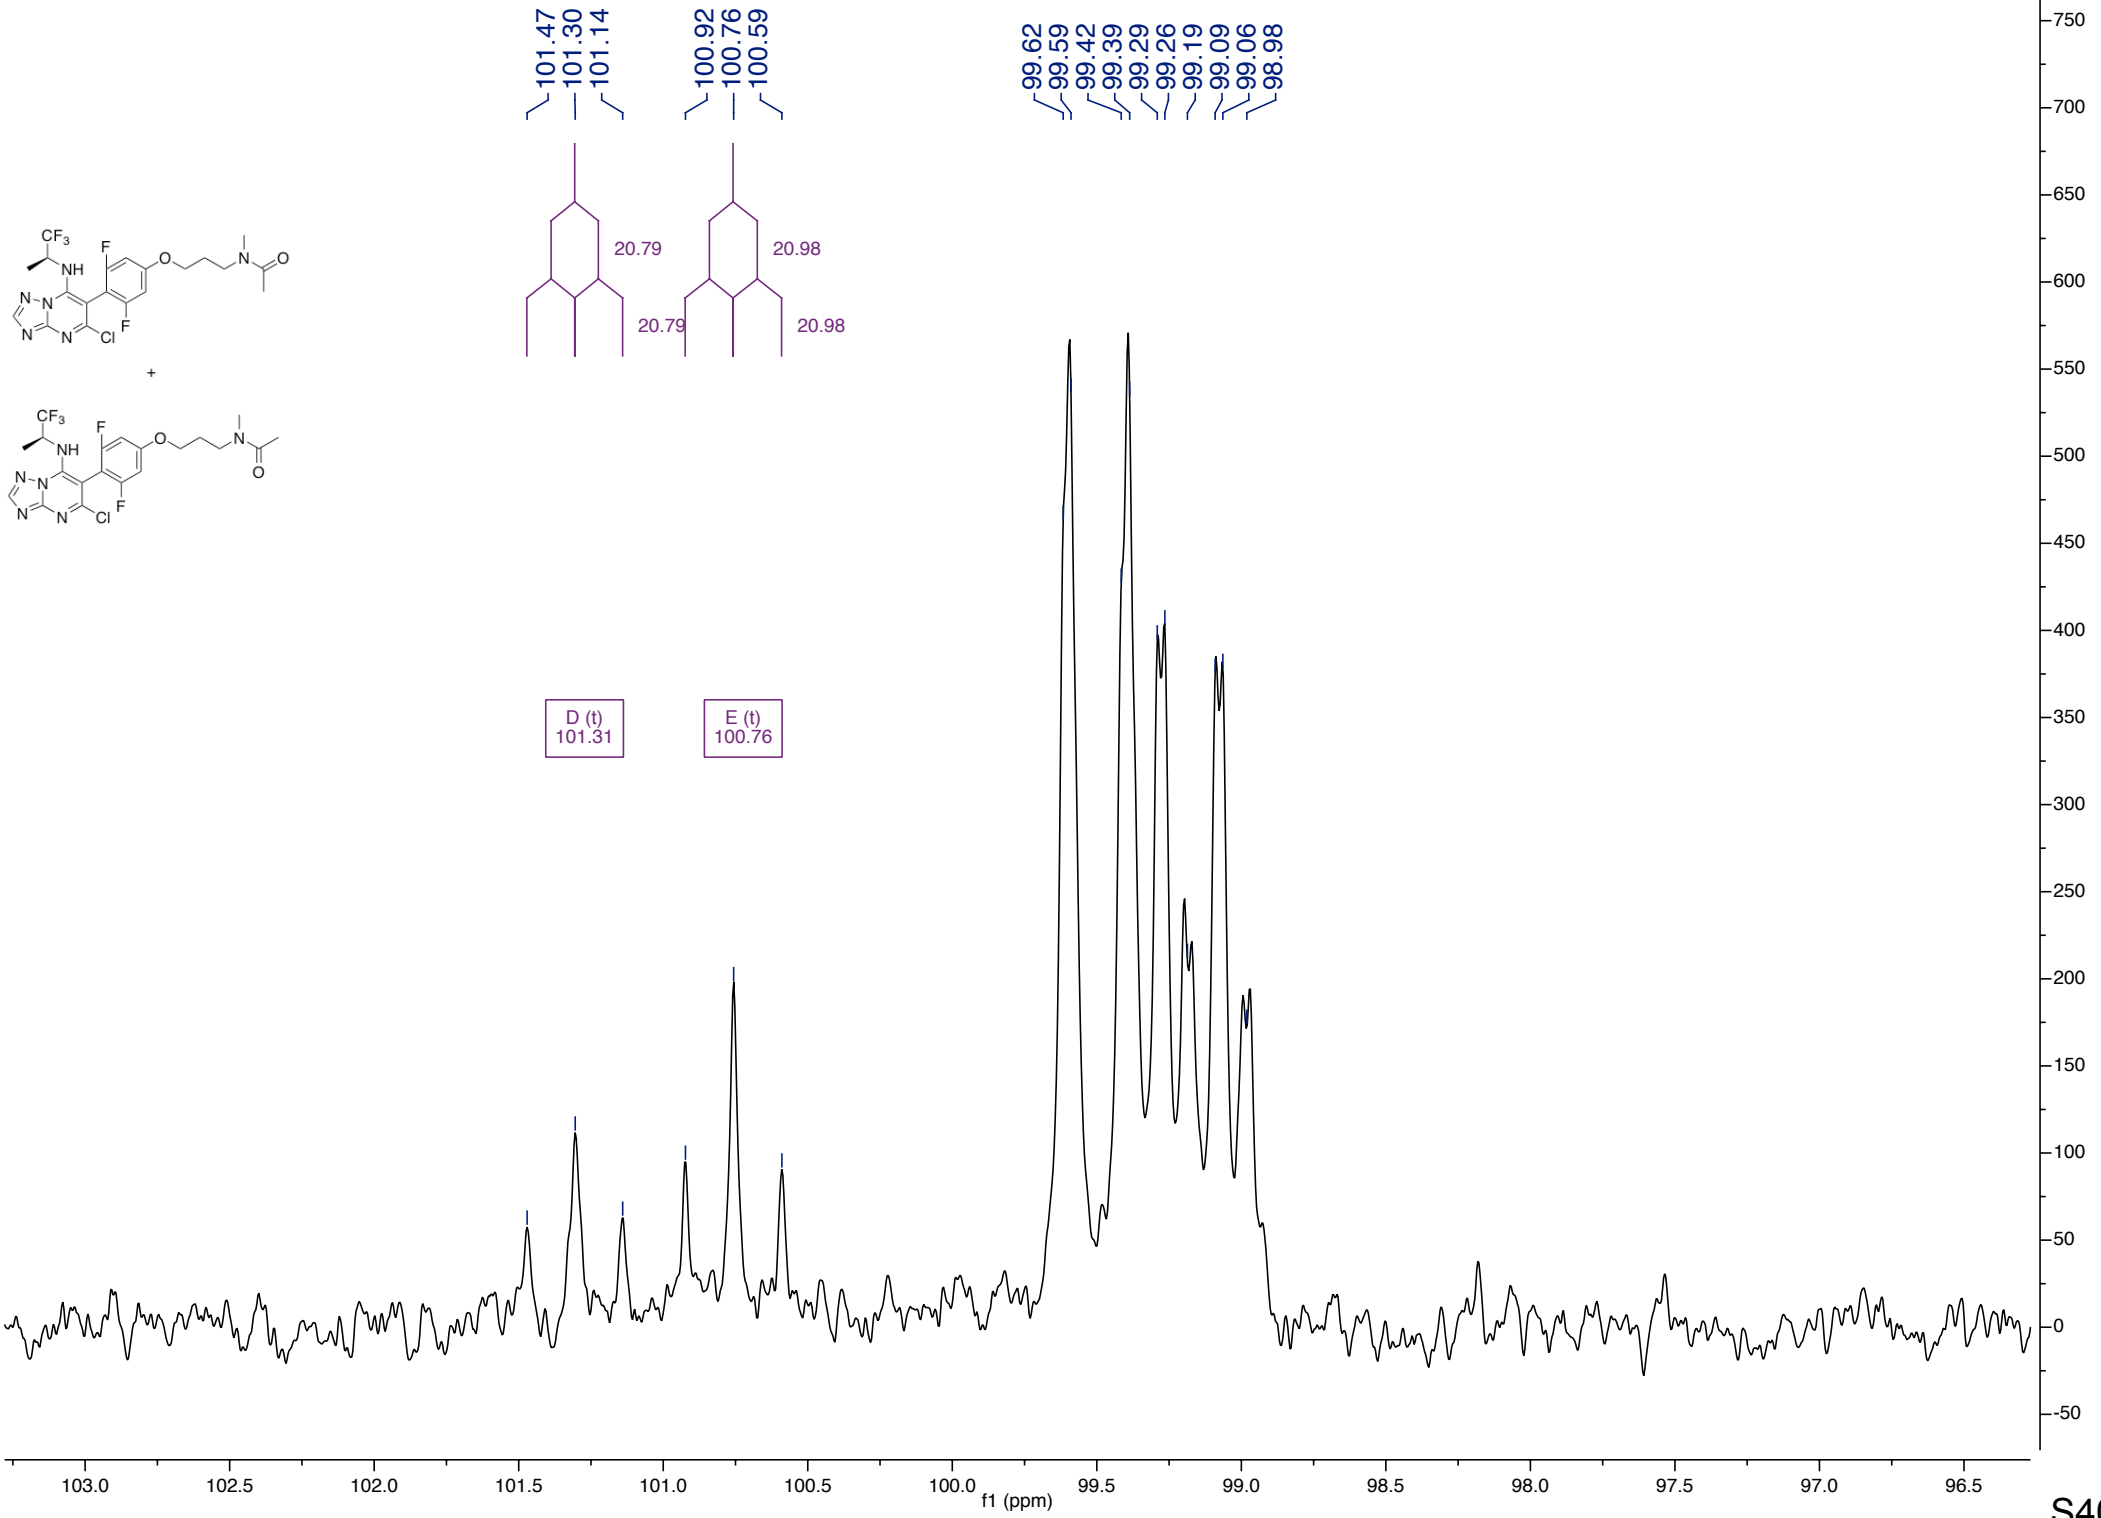



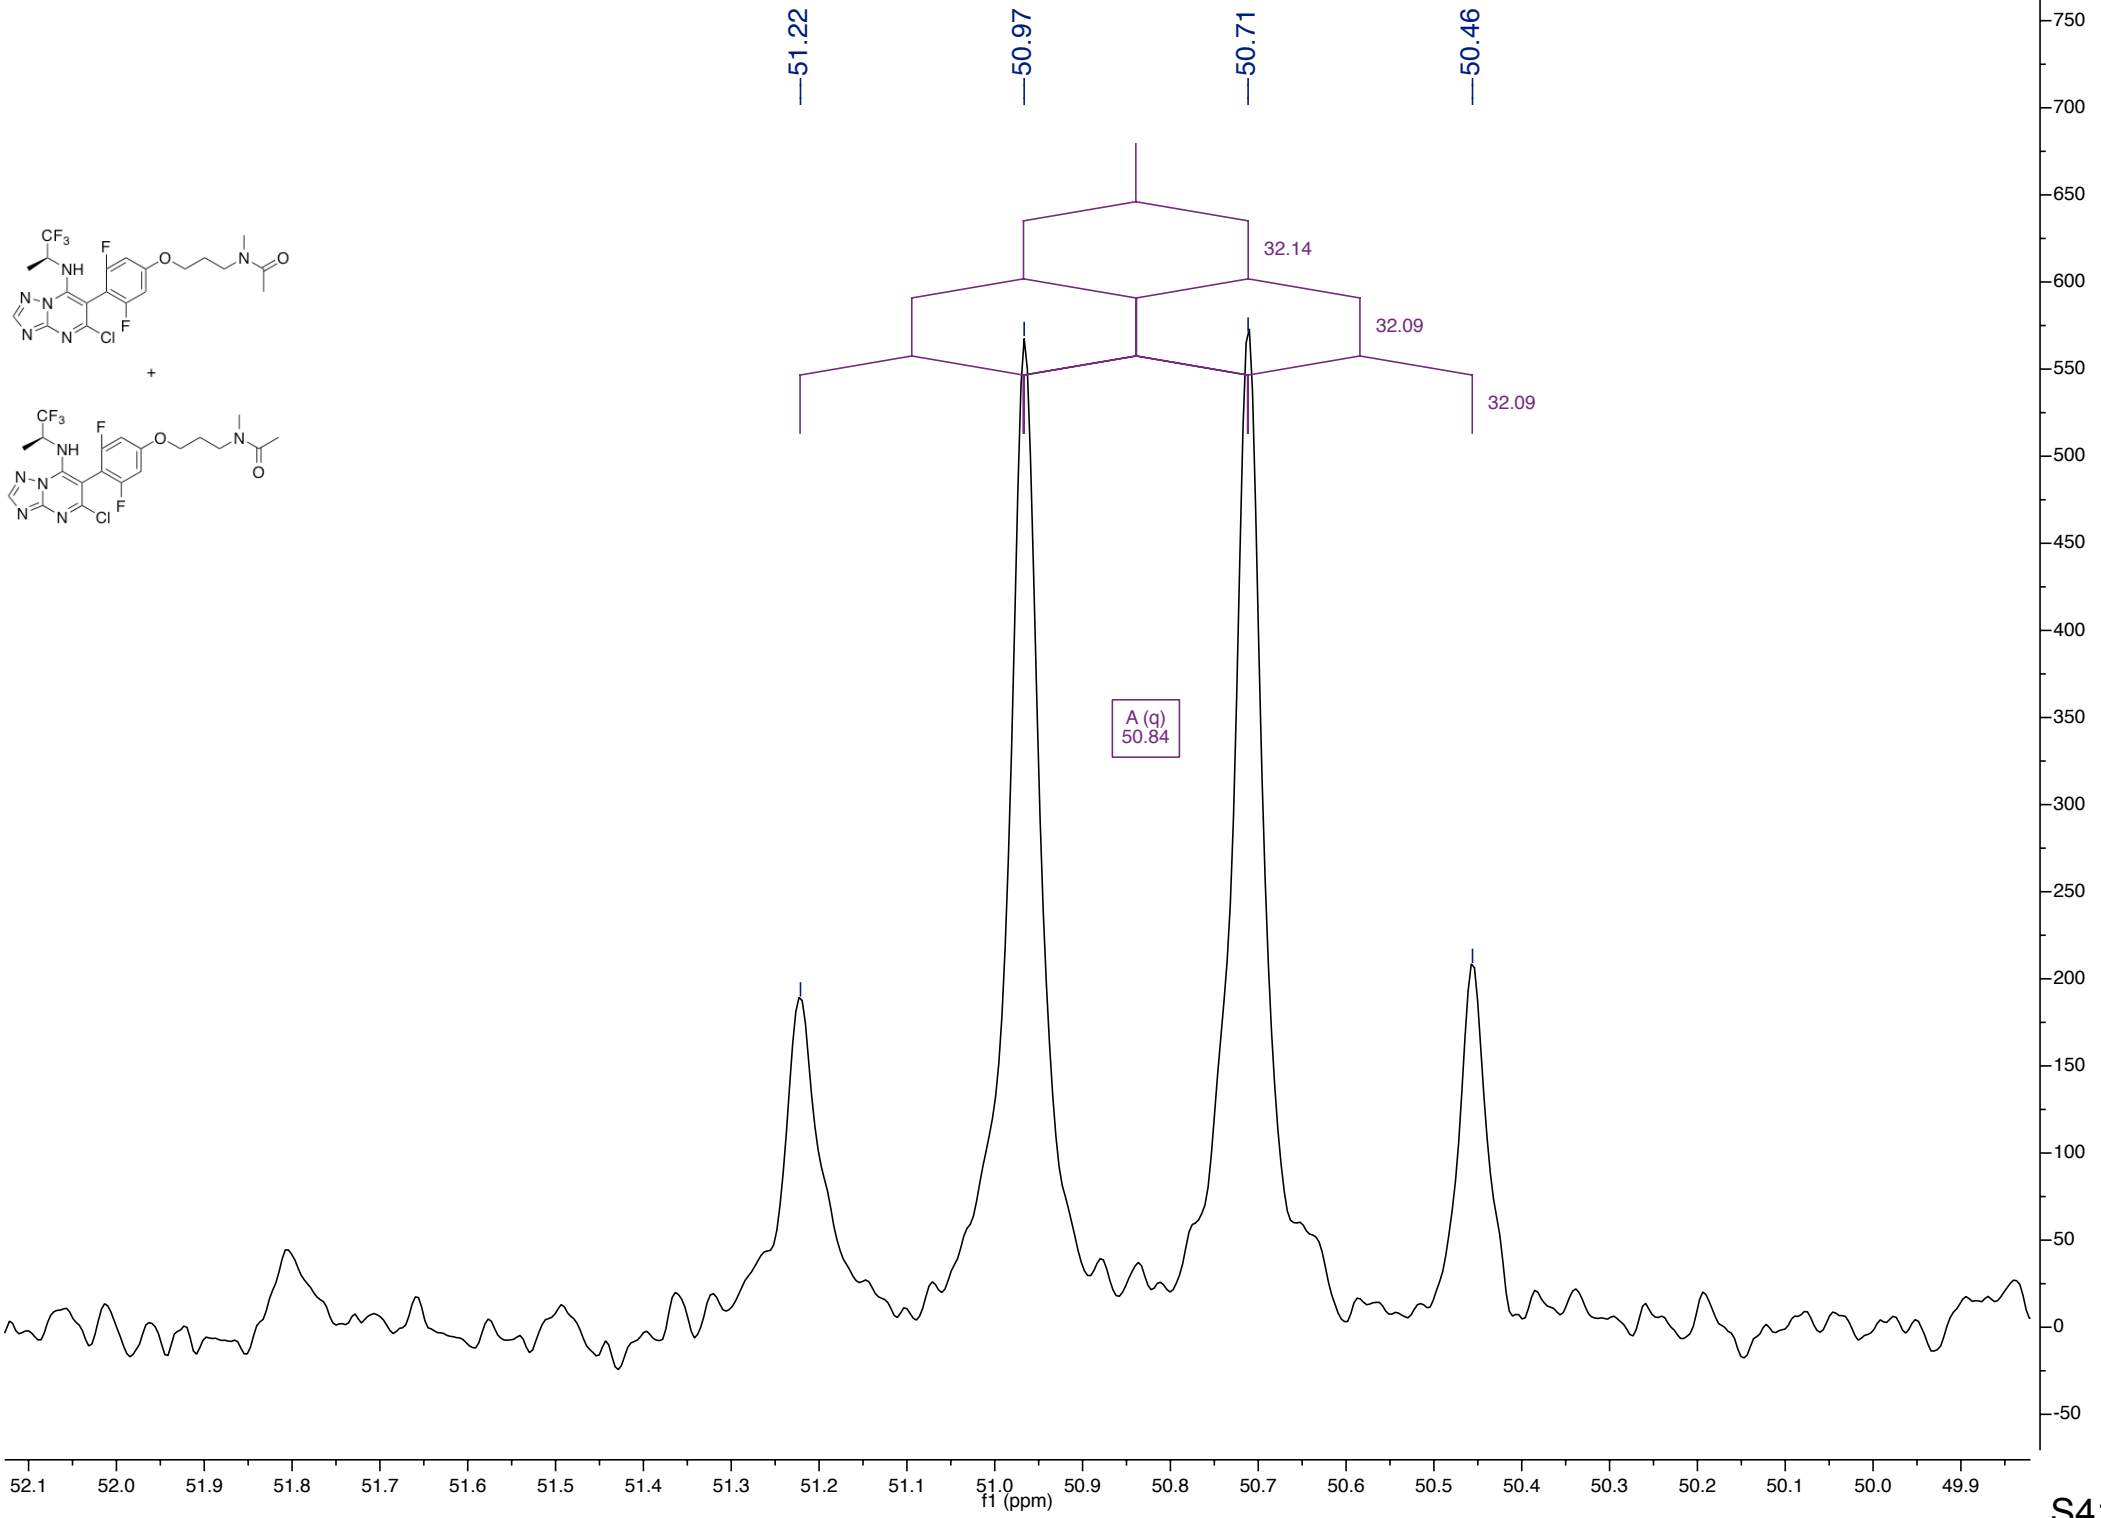

DEPT 135

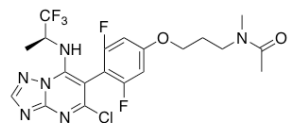

+

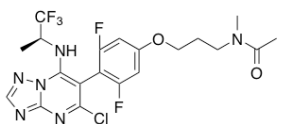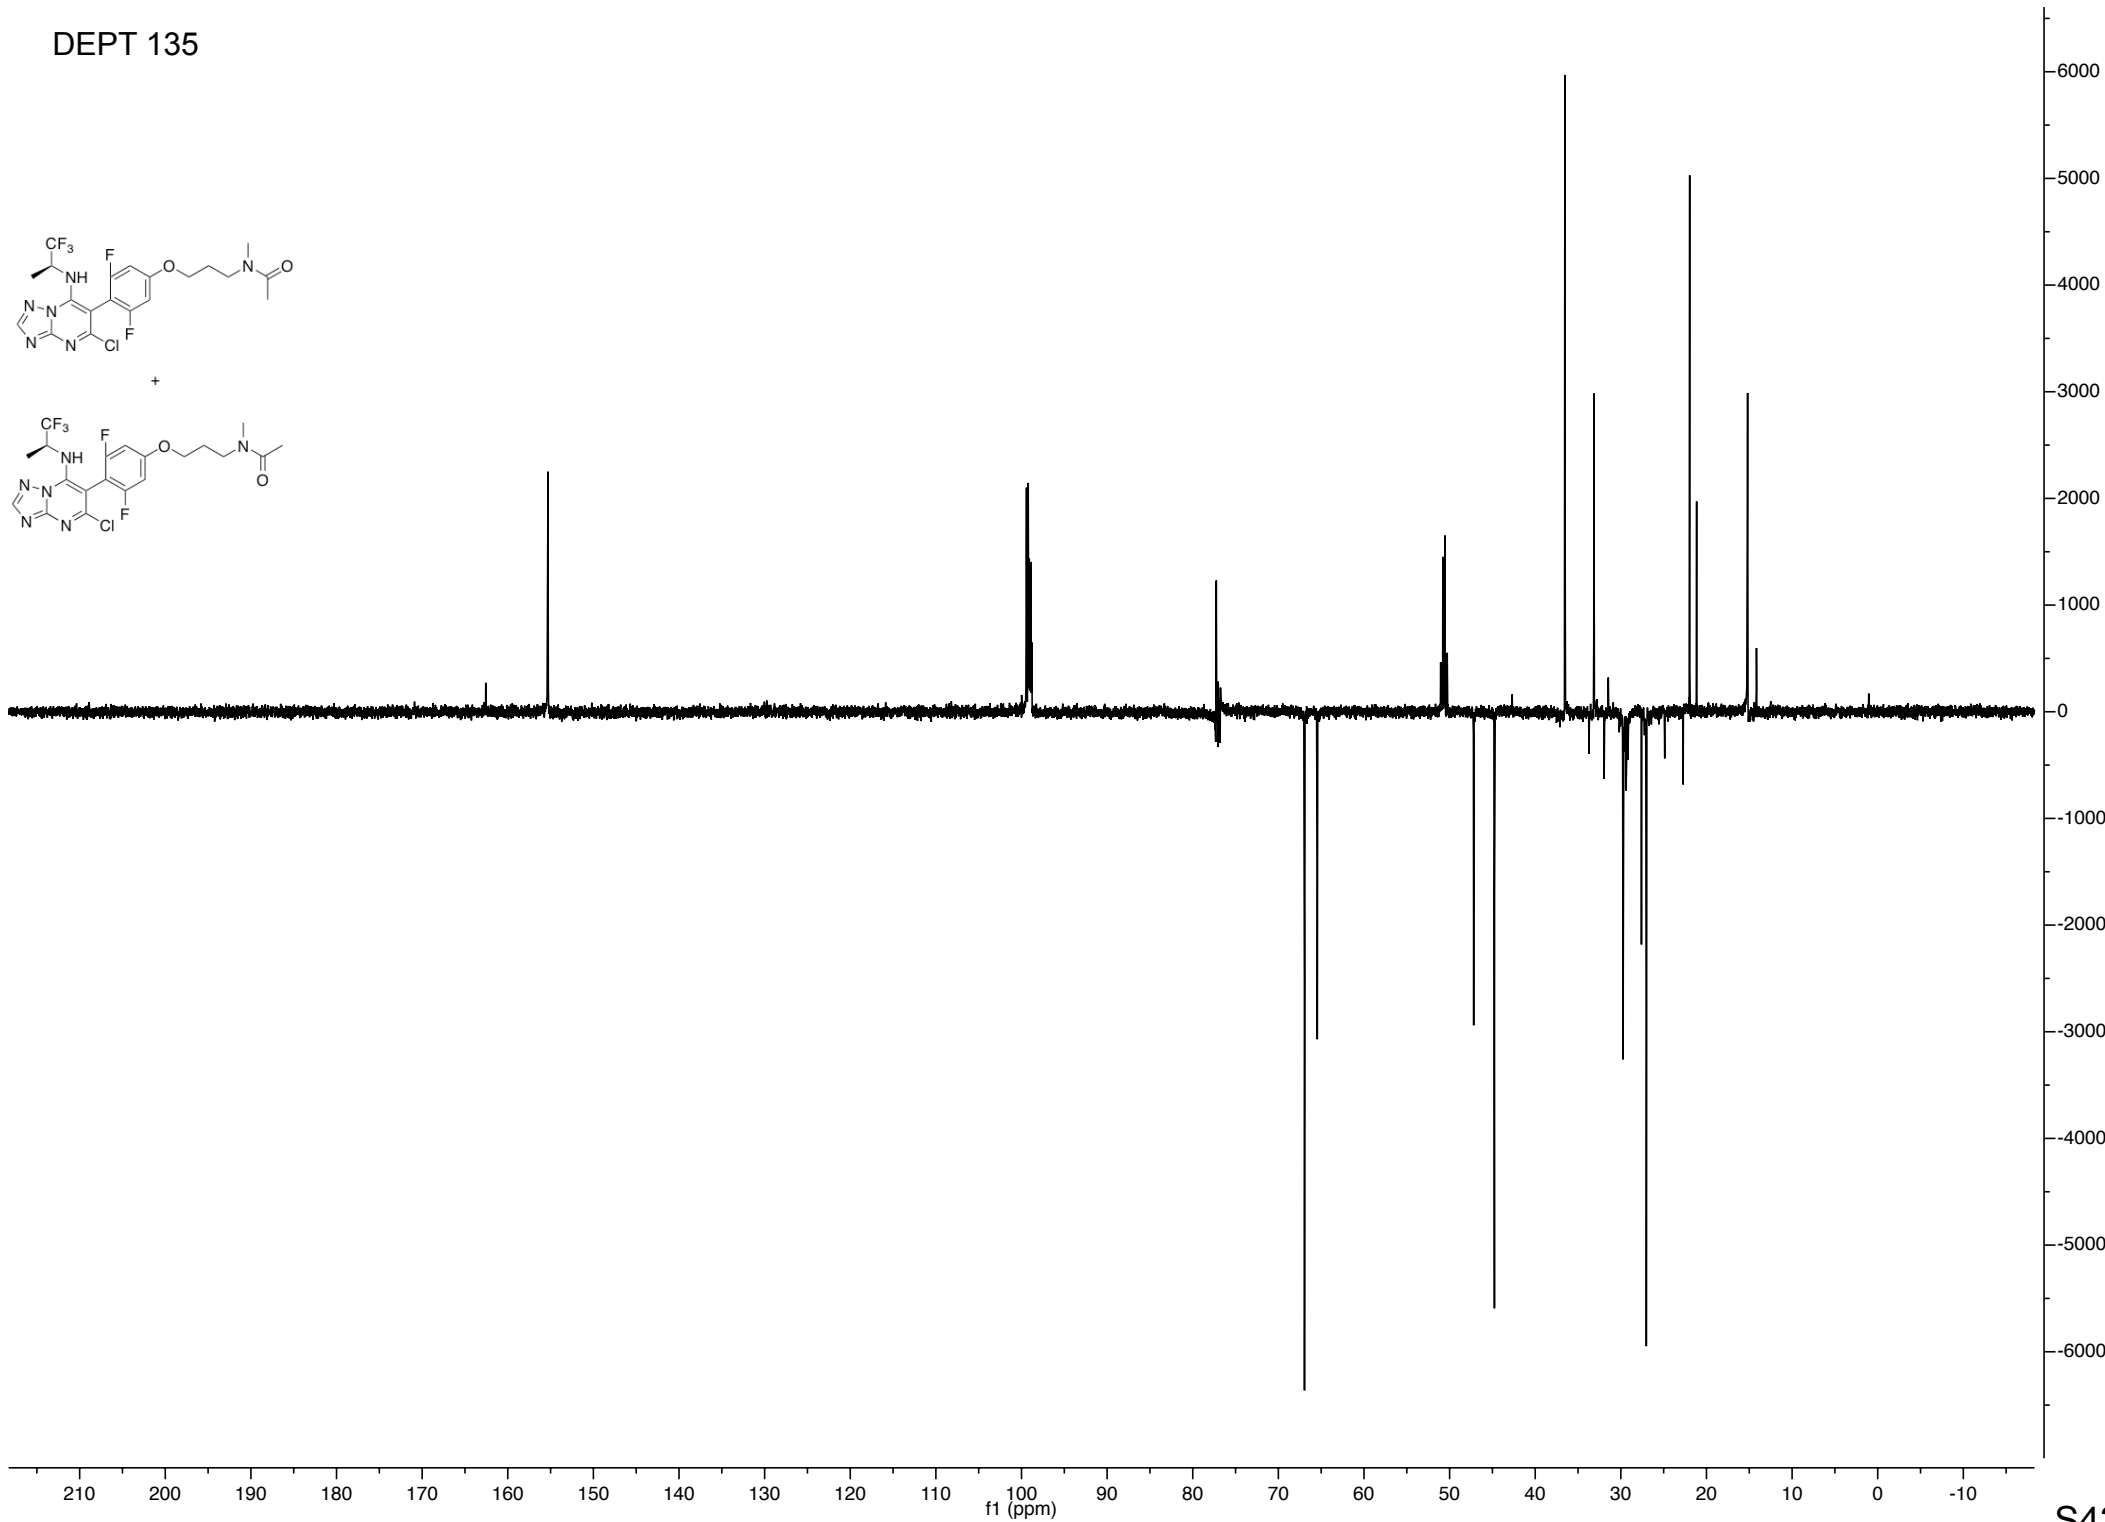

DEPT 90

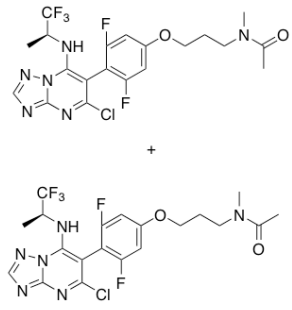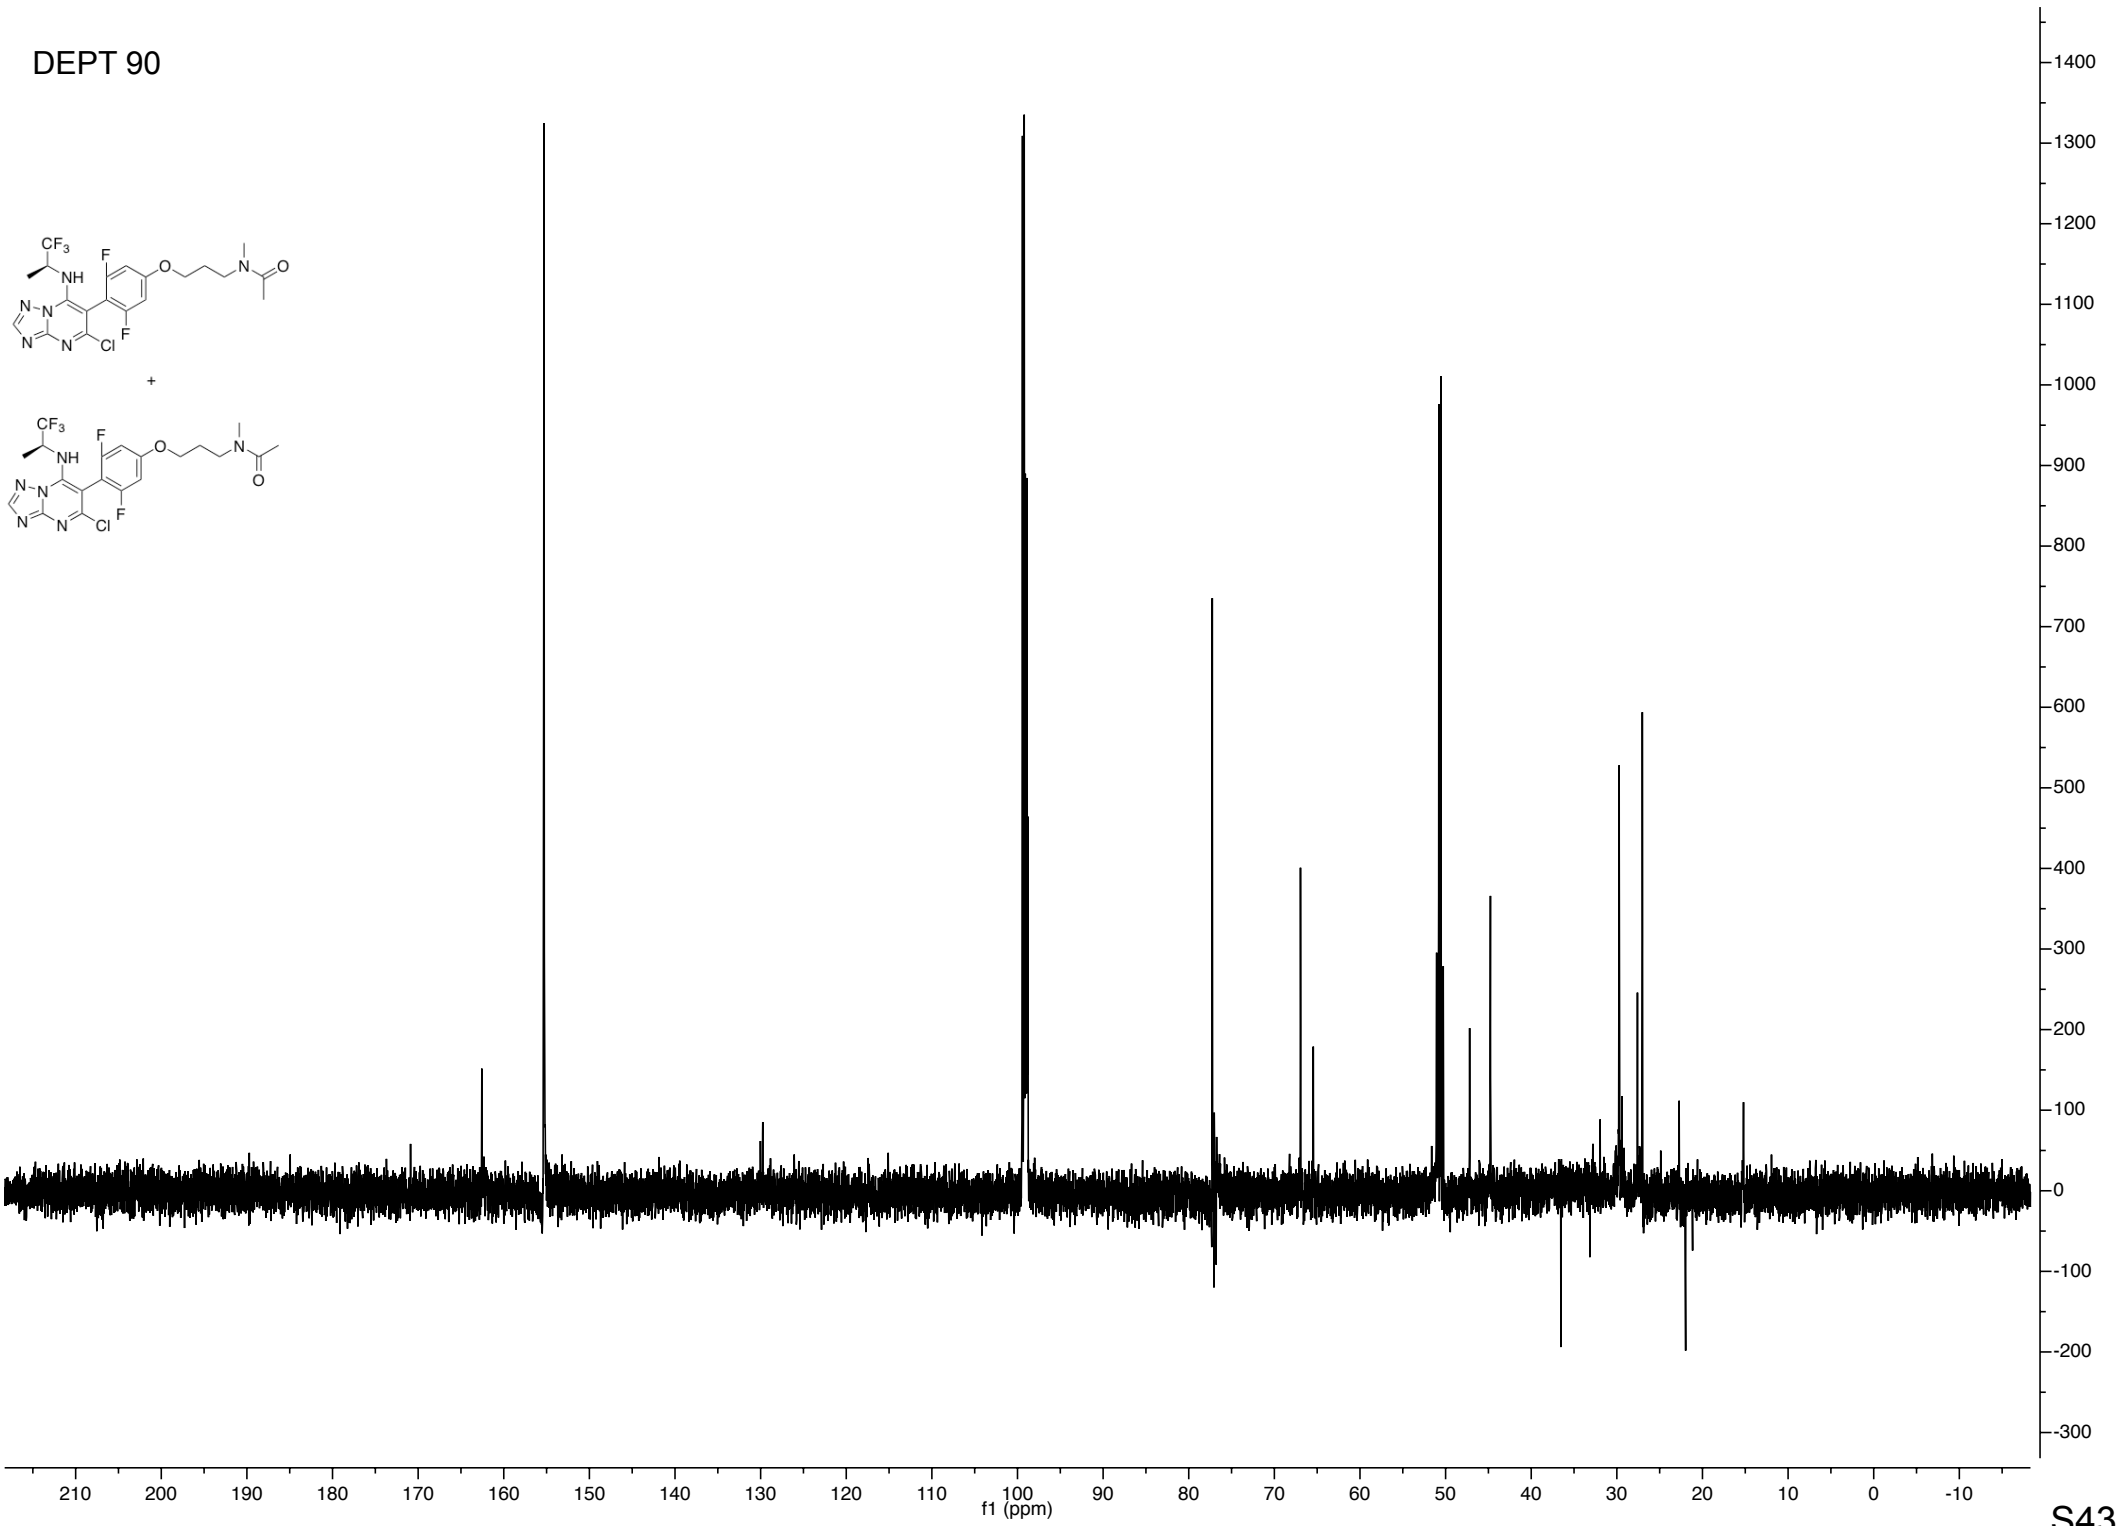

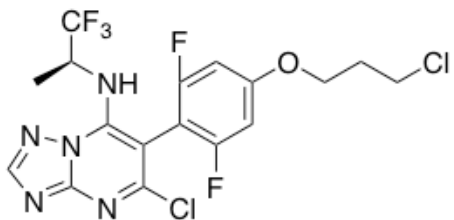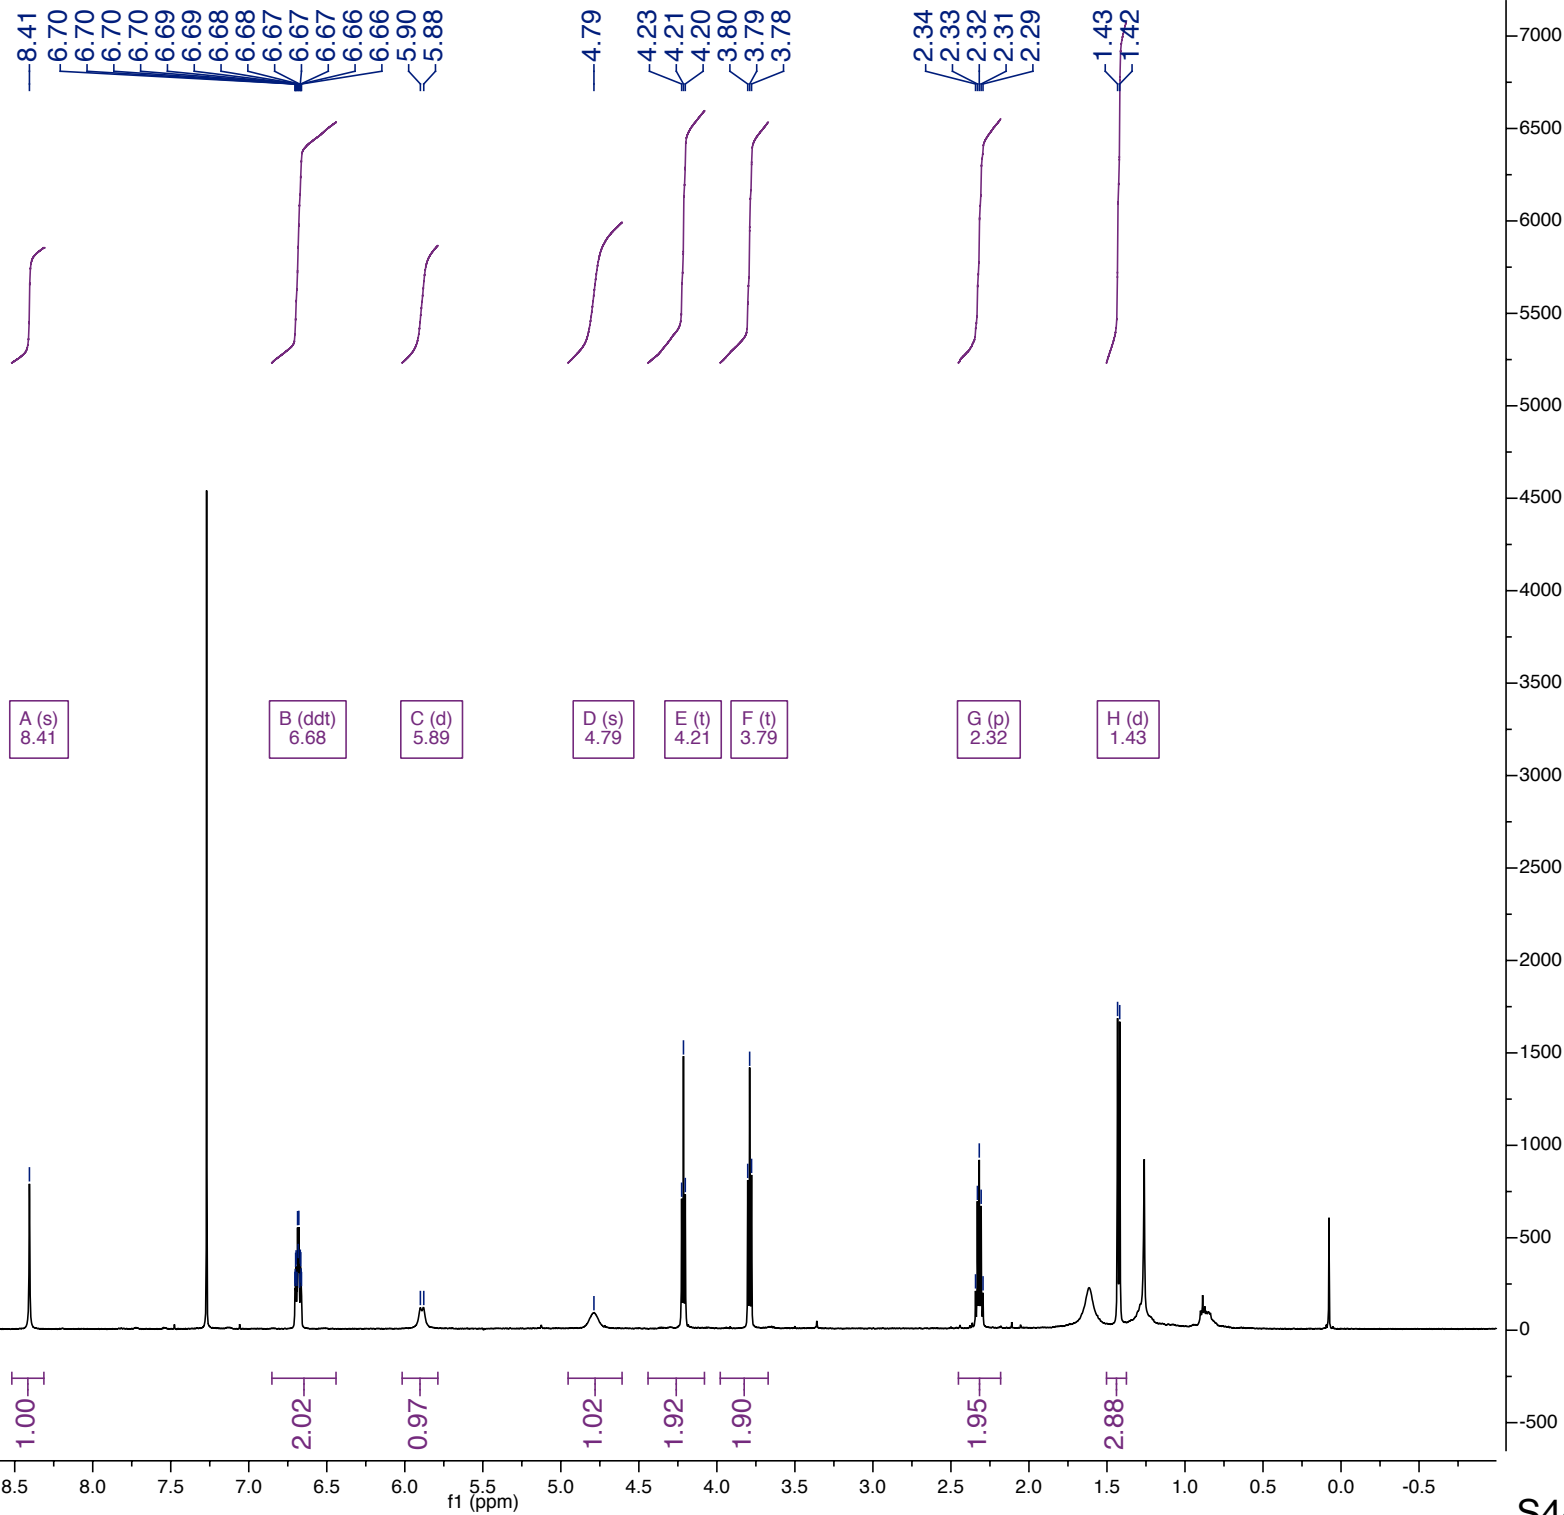

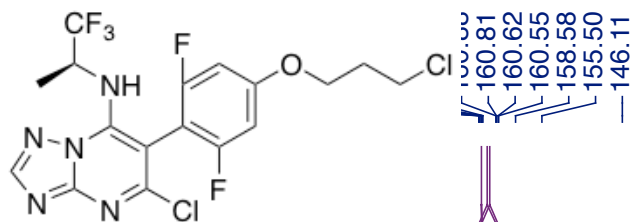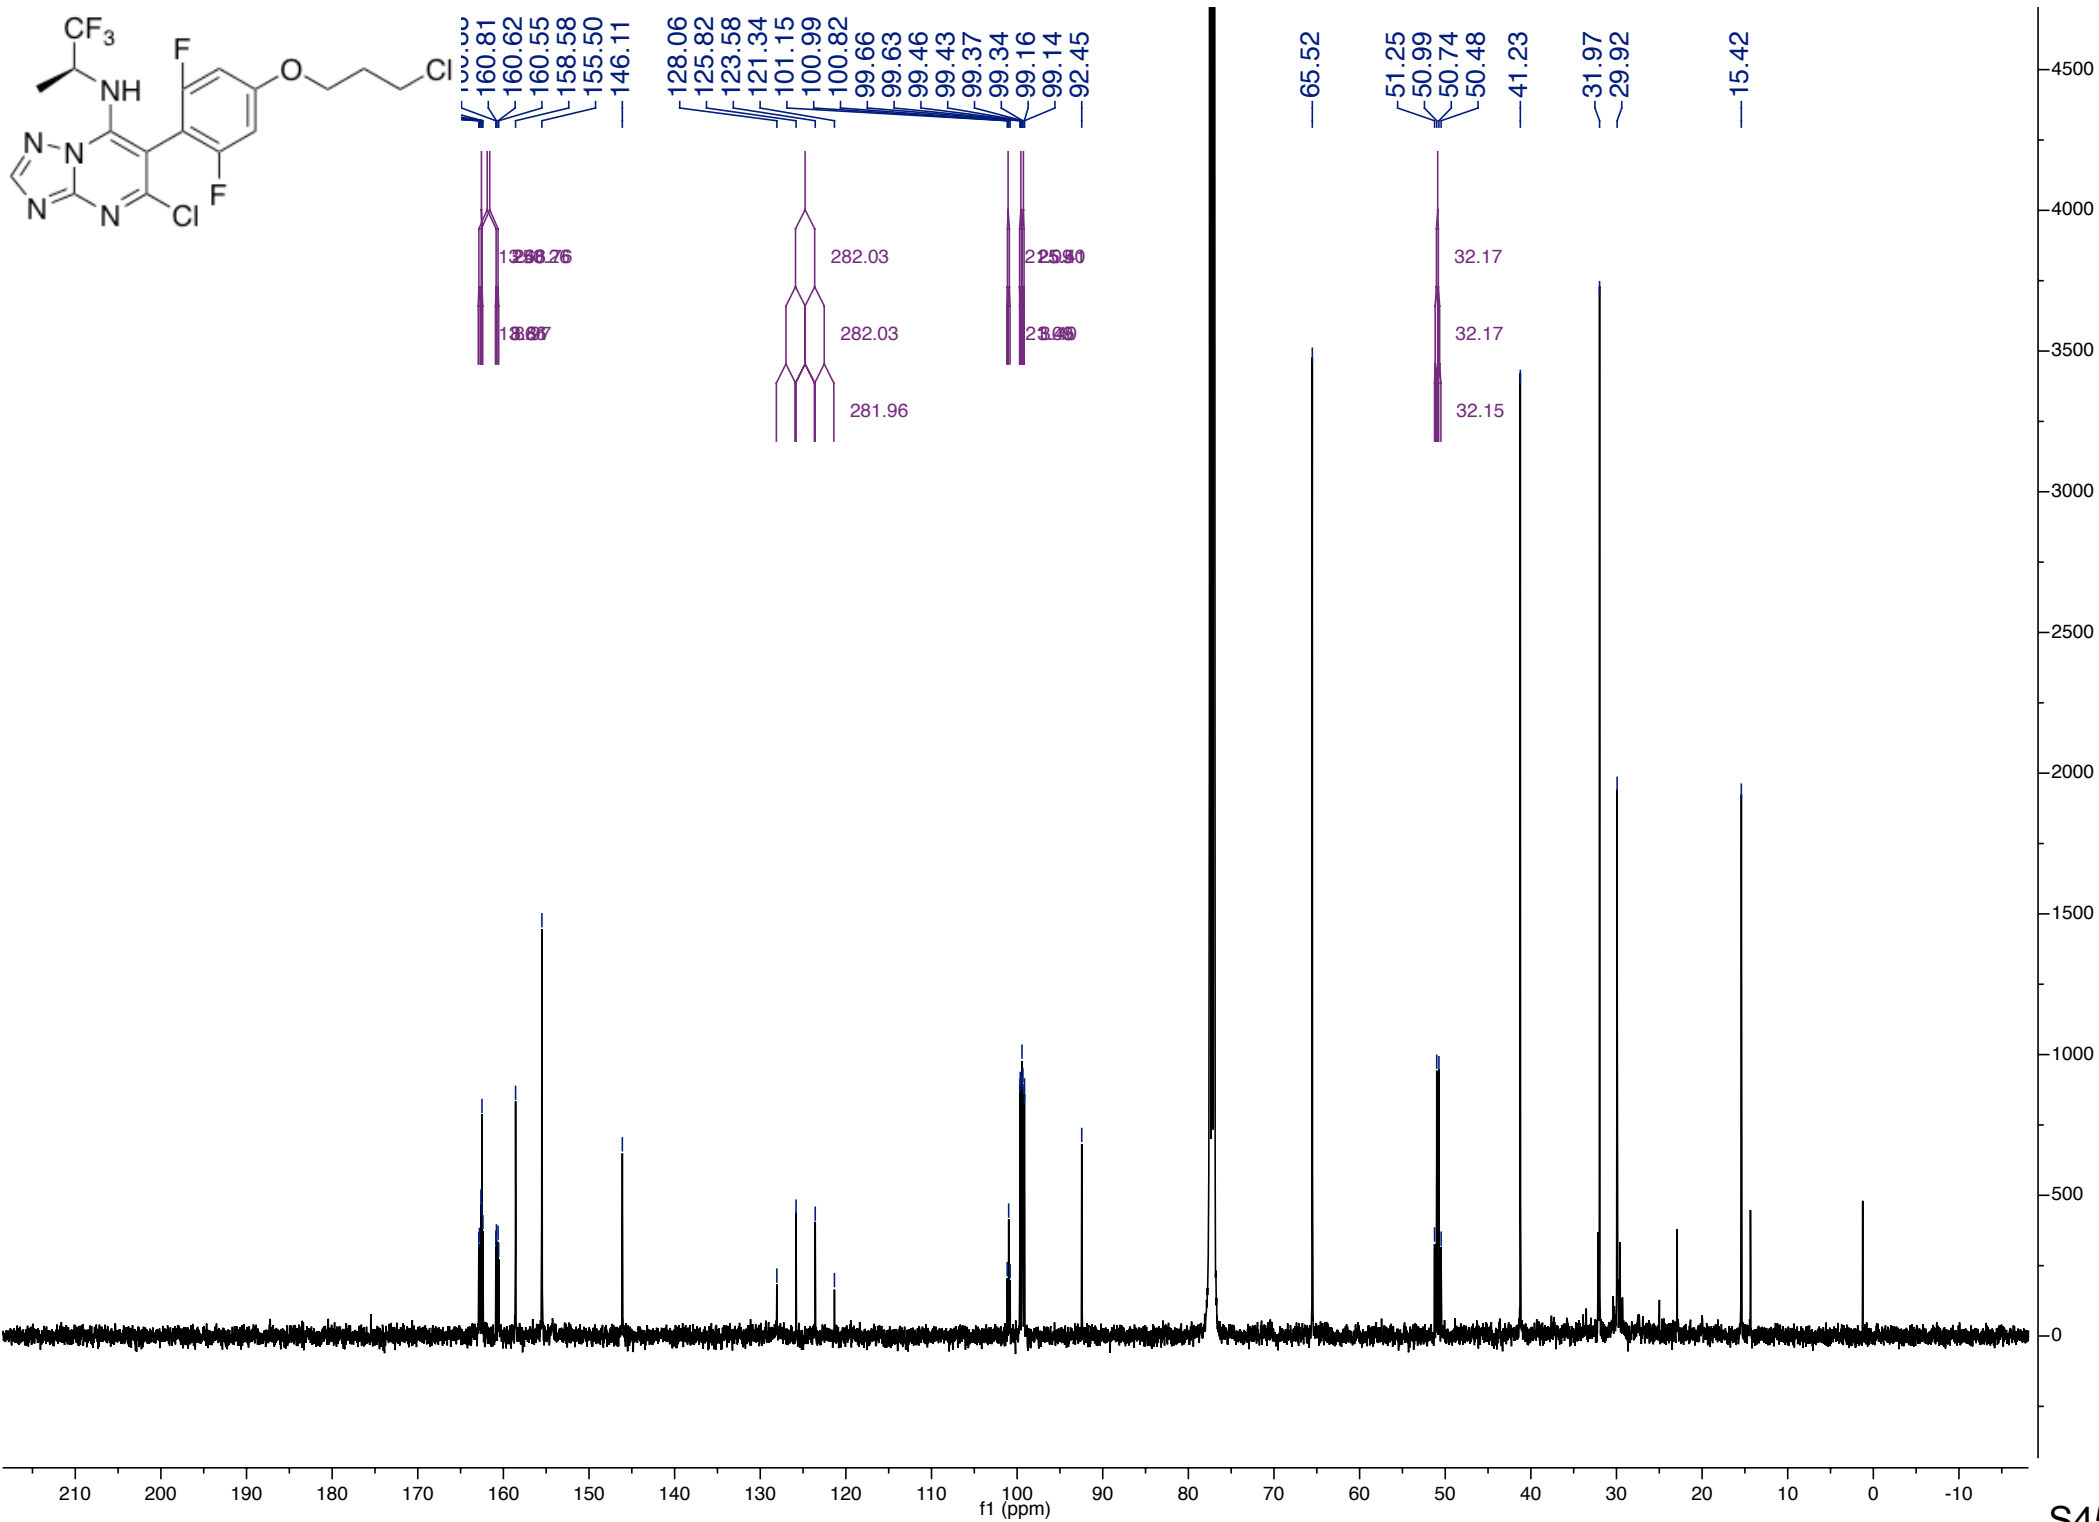

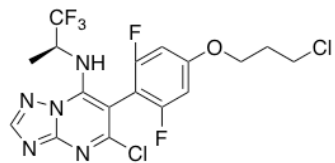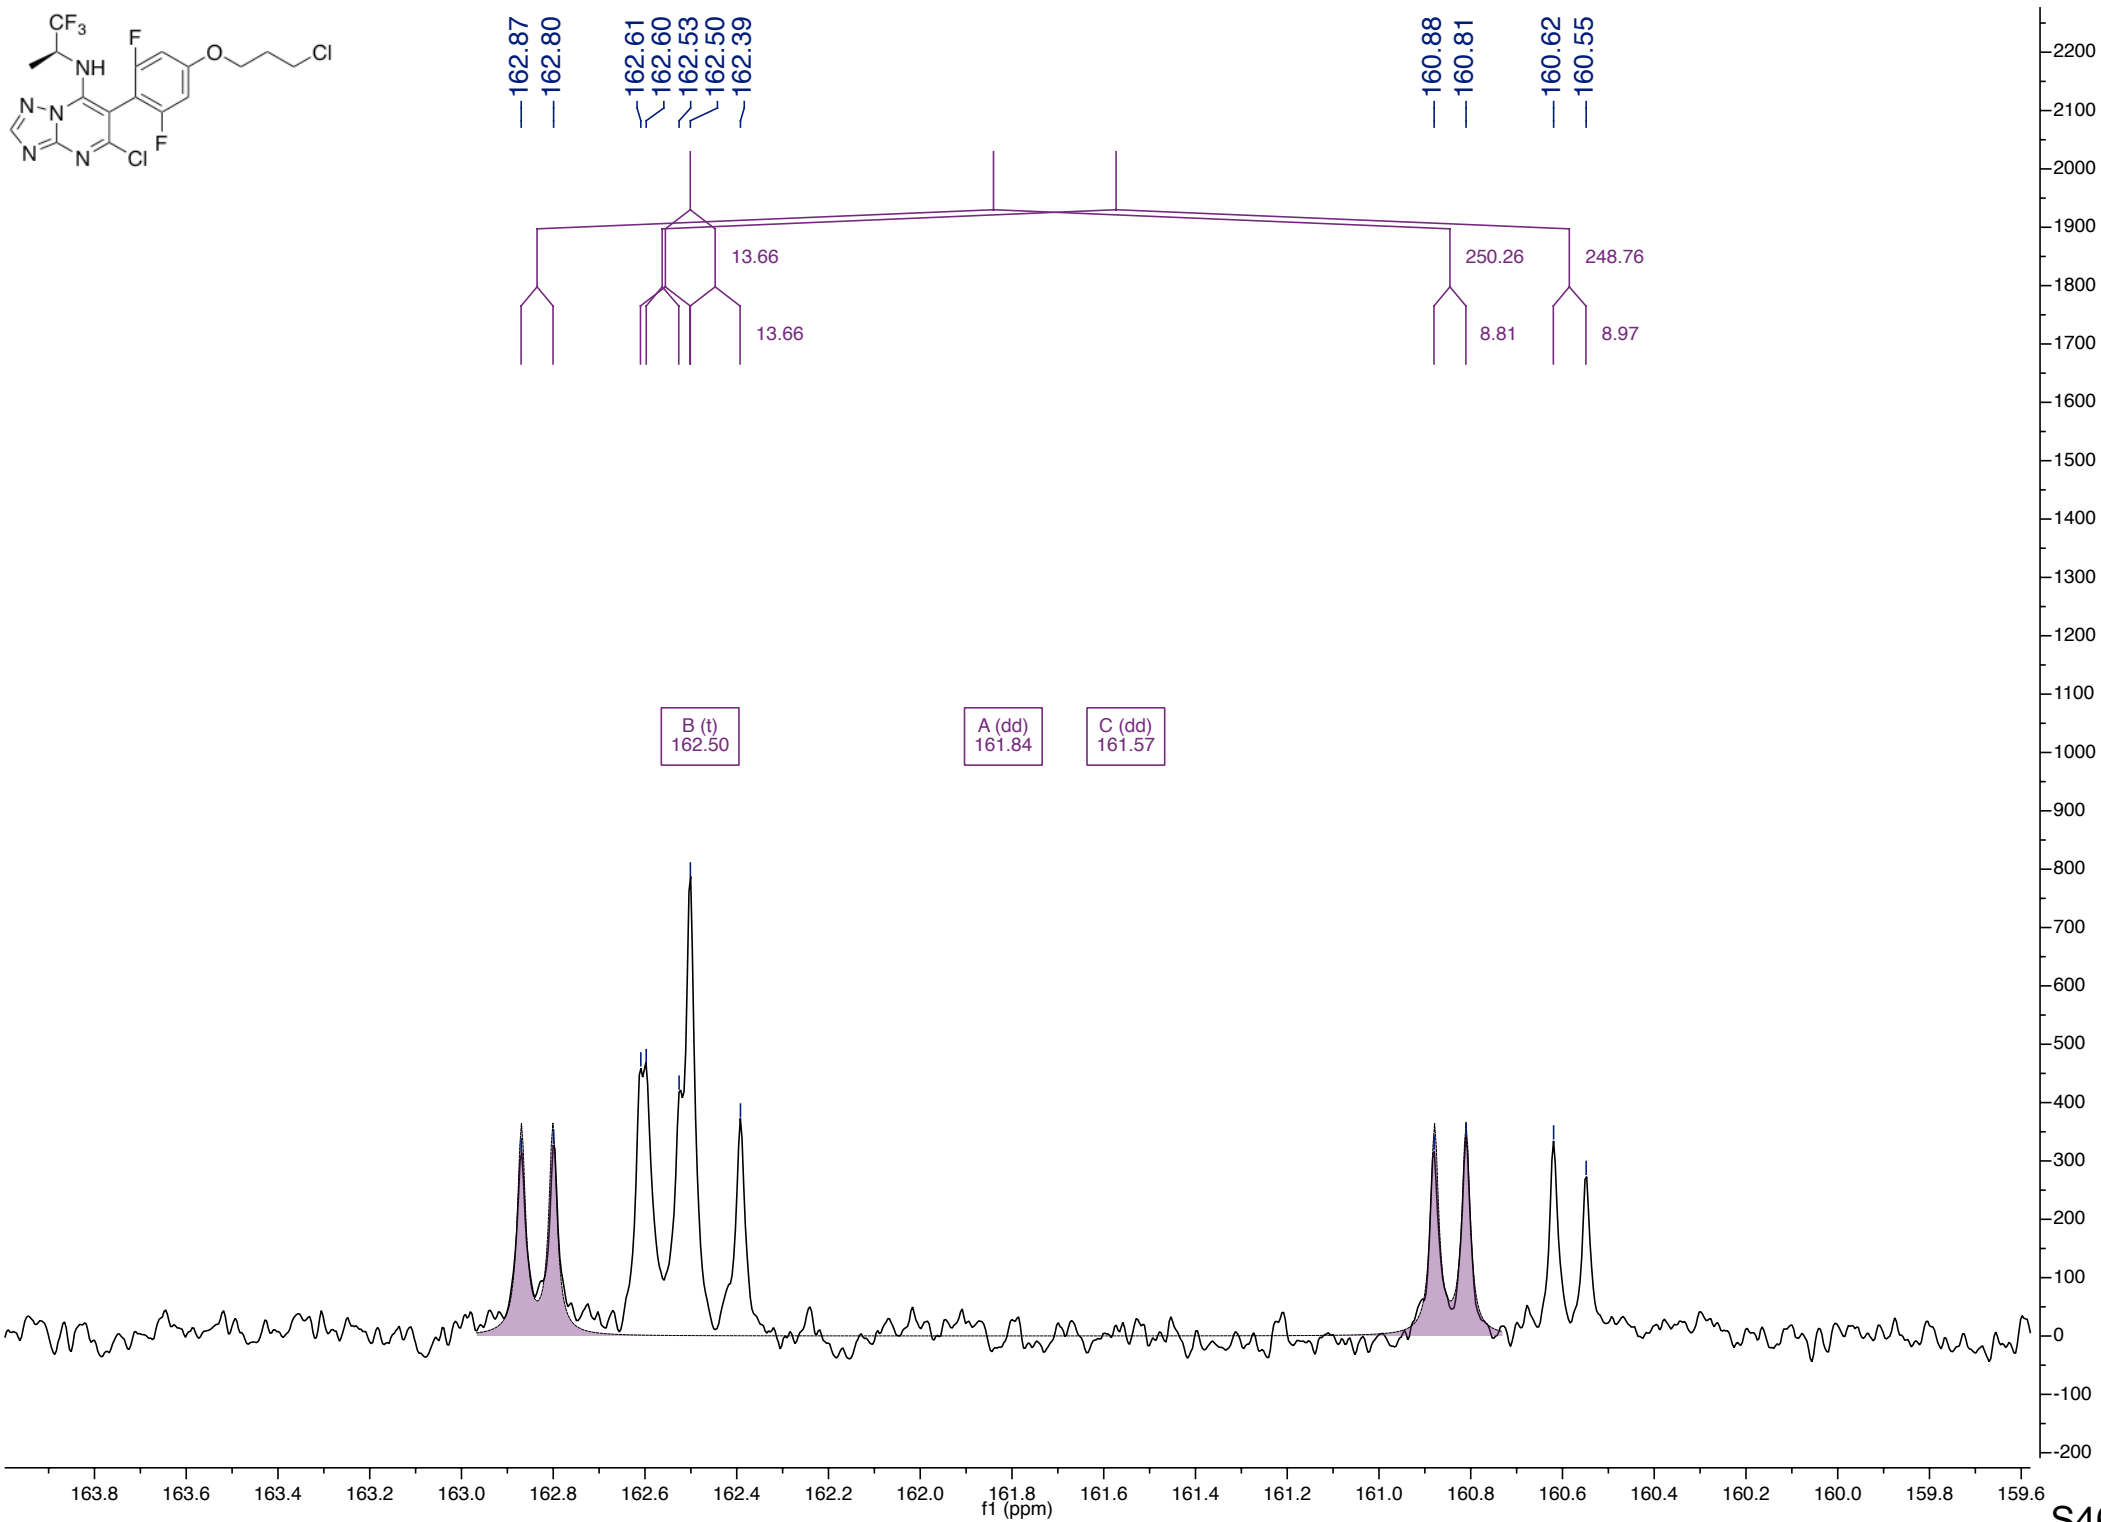

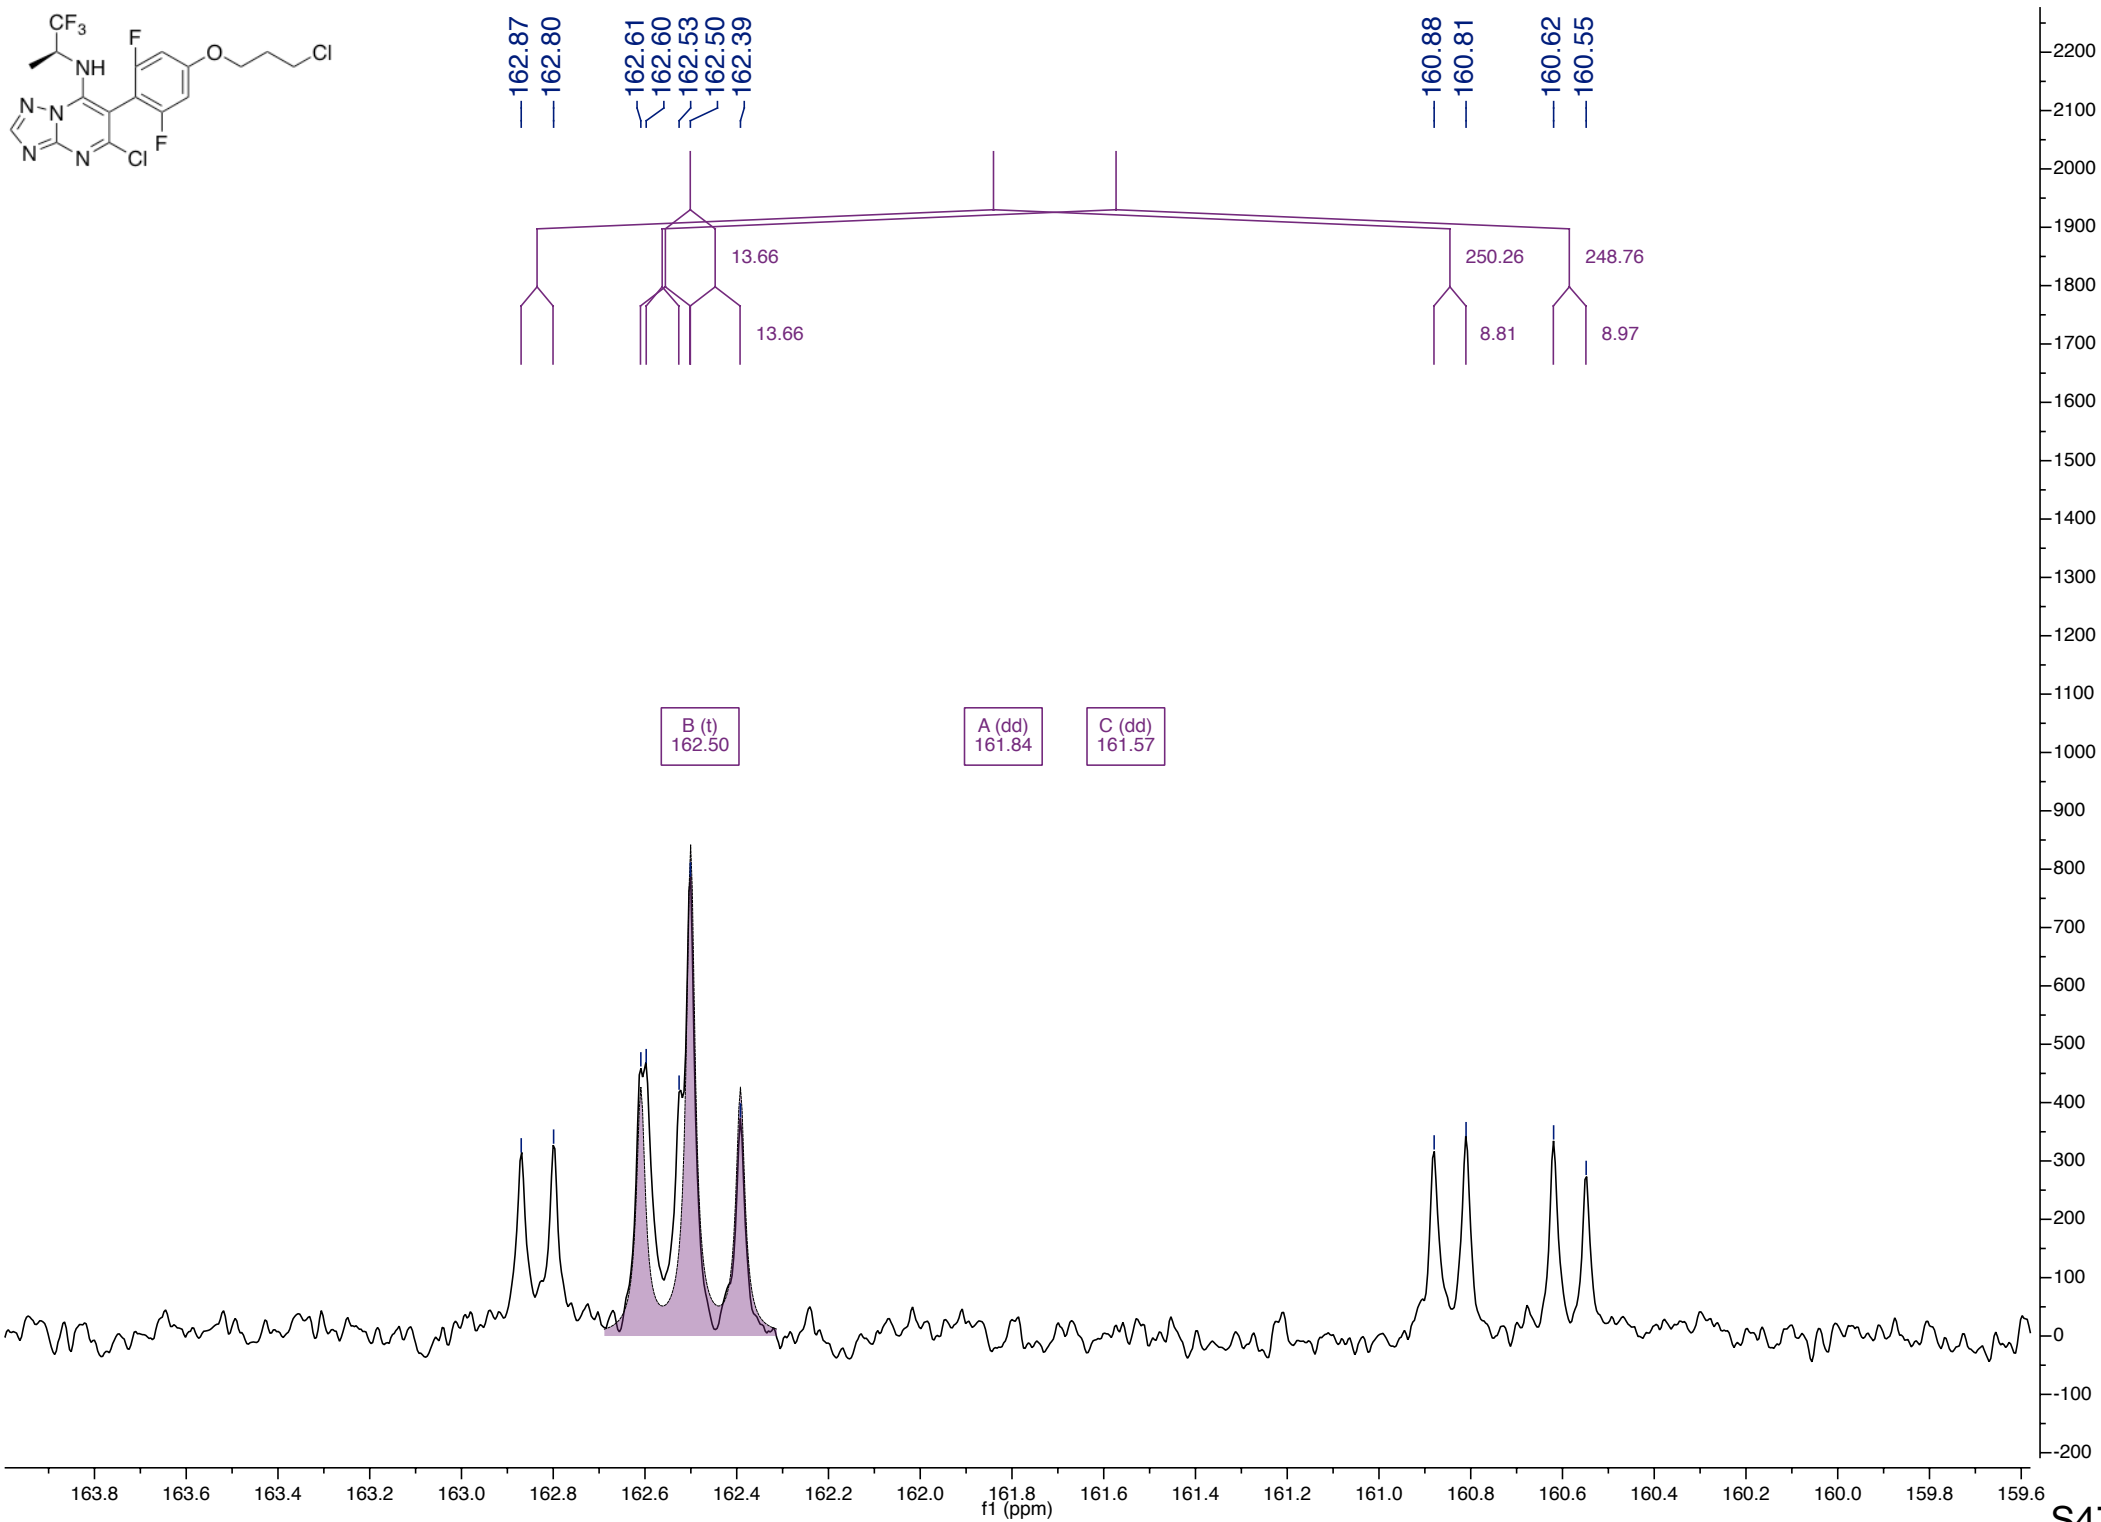

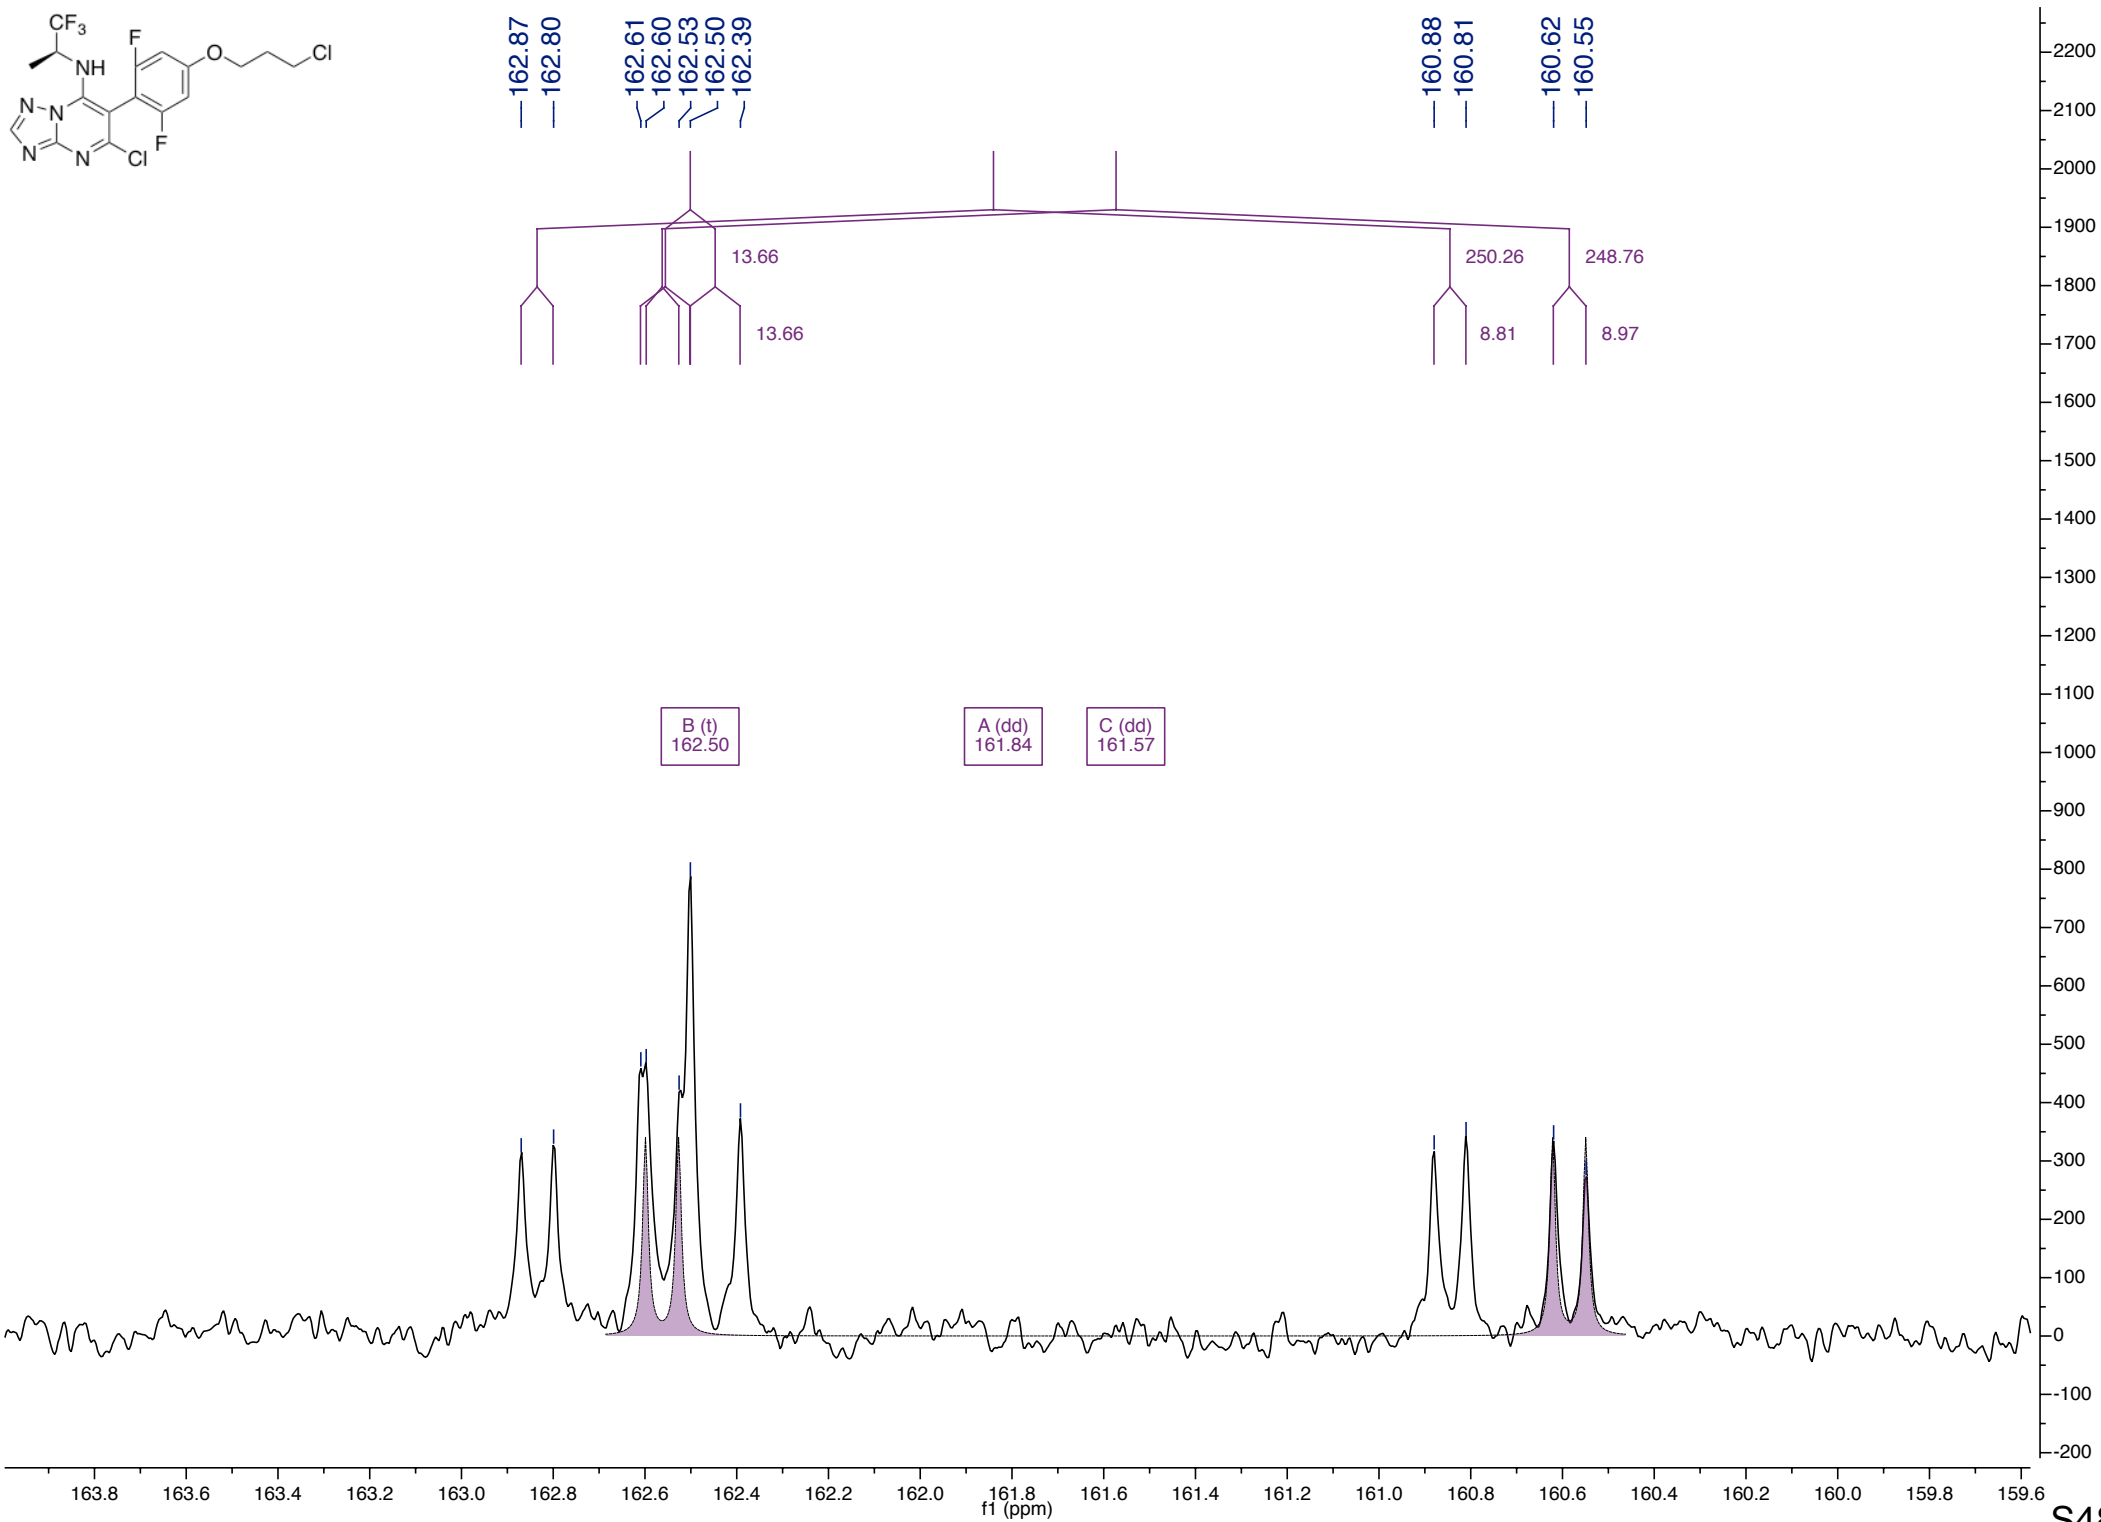



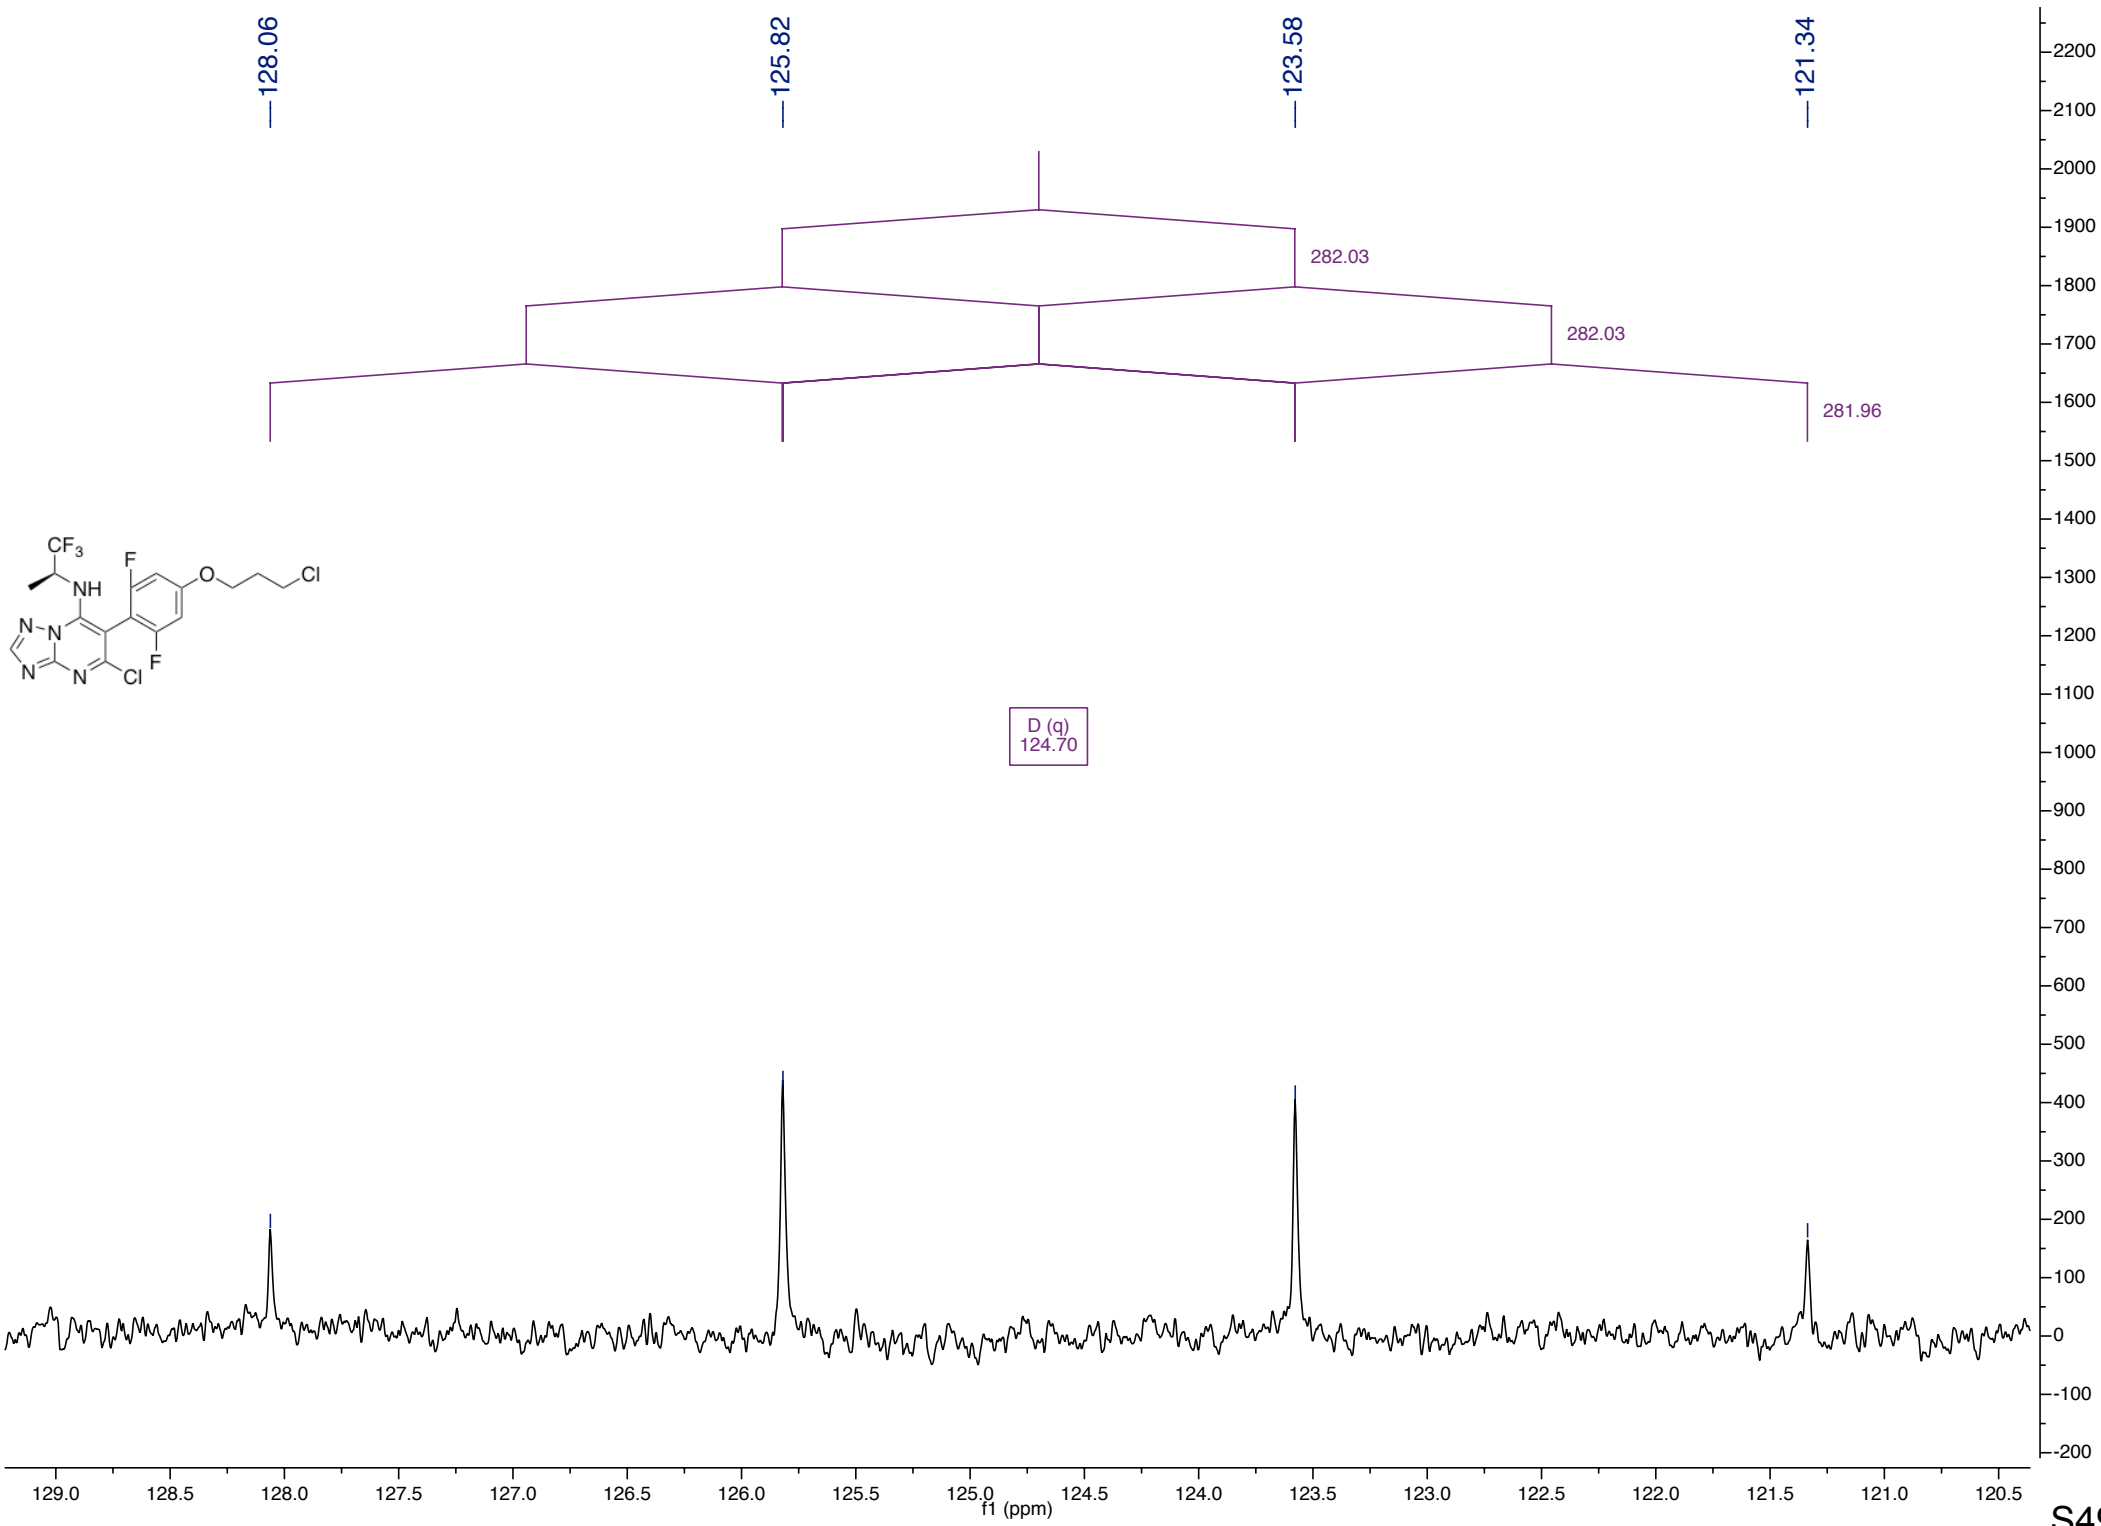

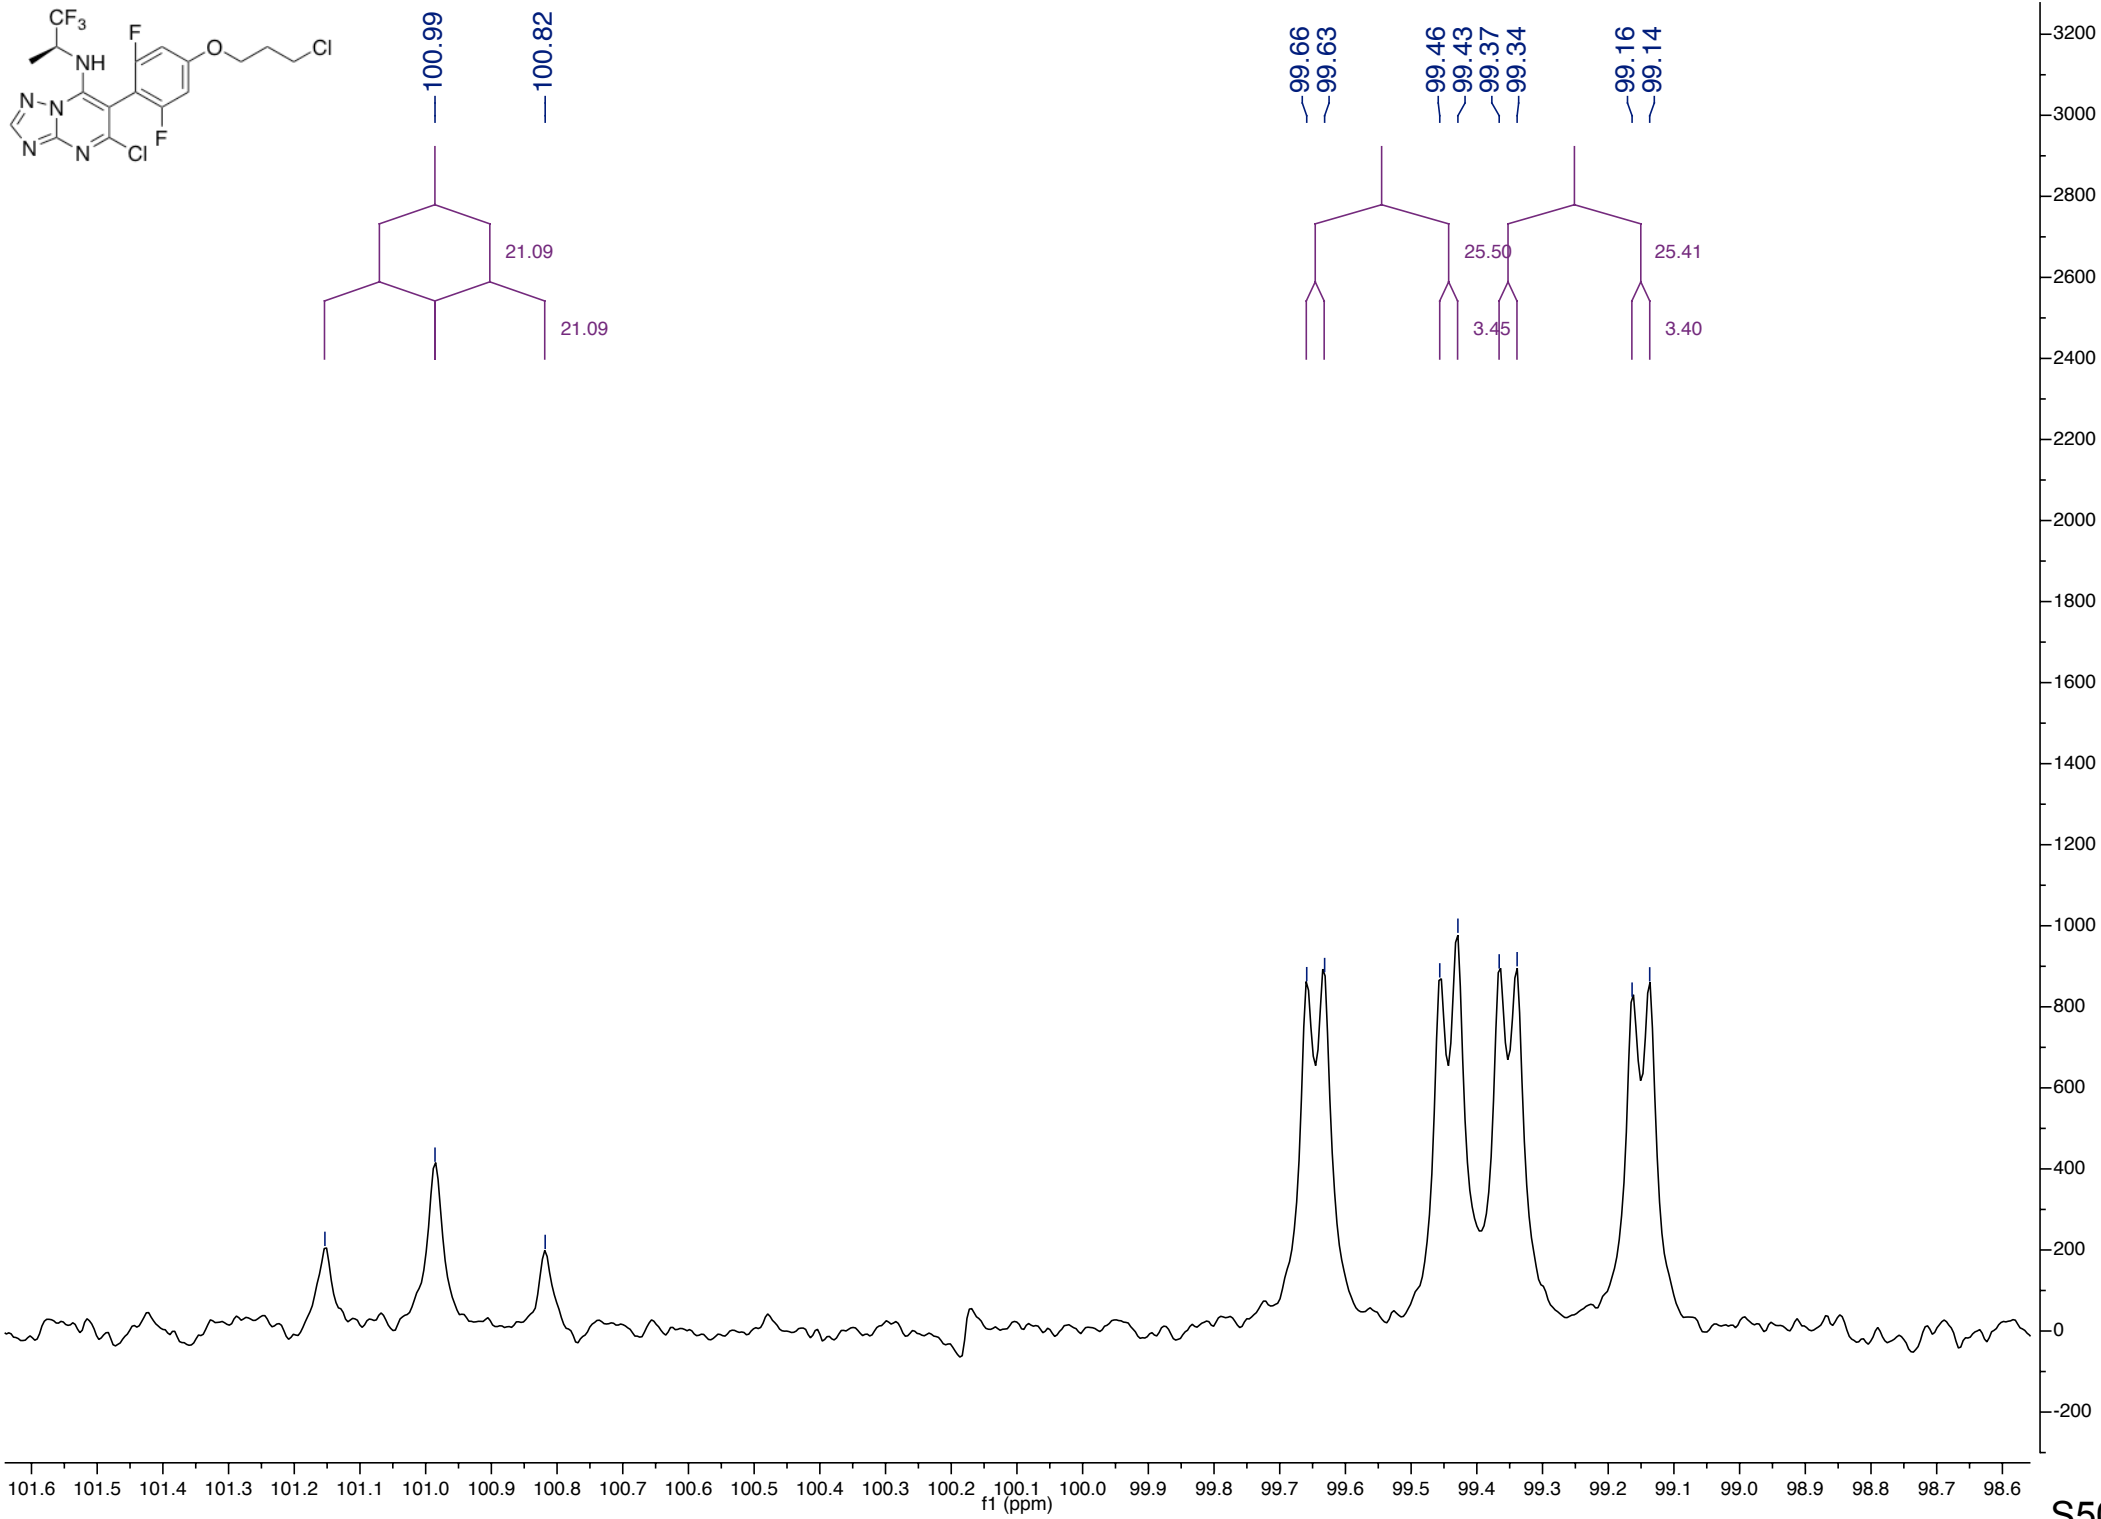

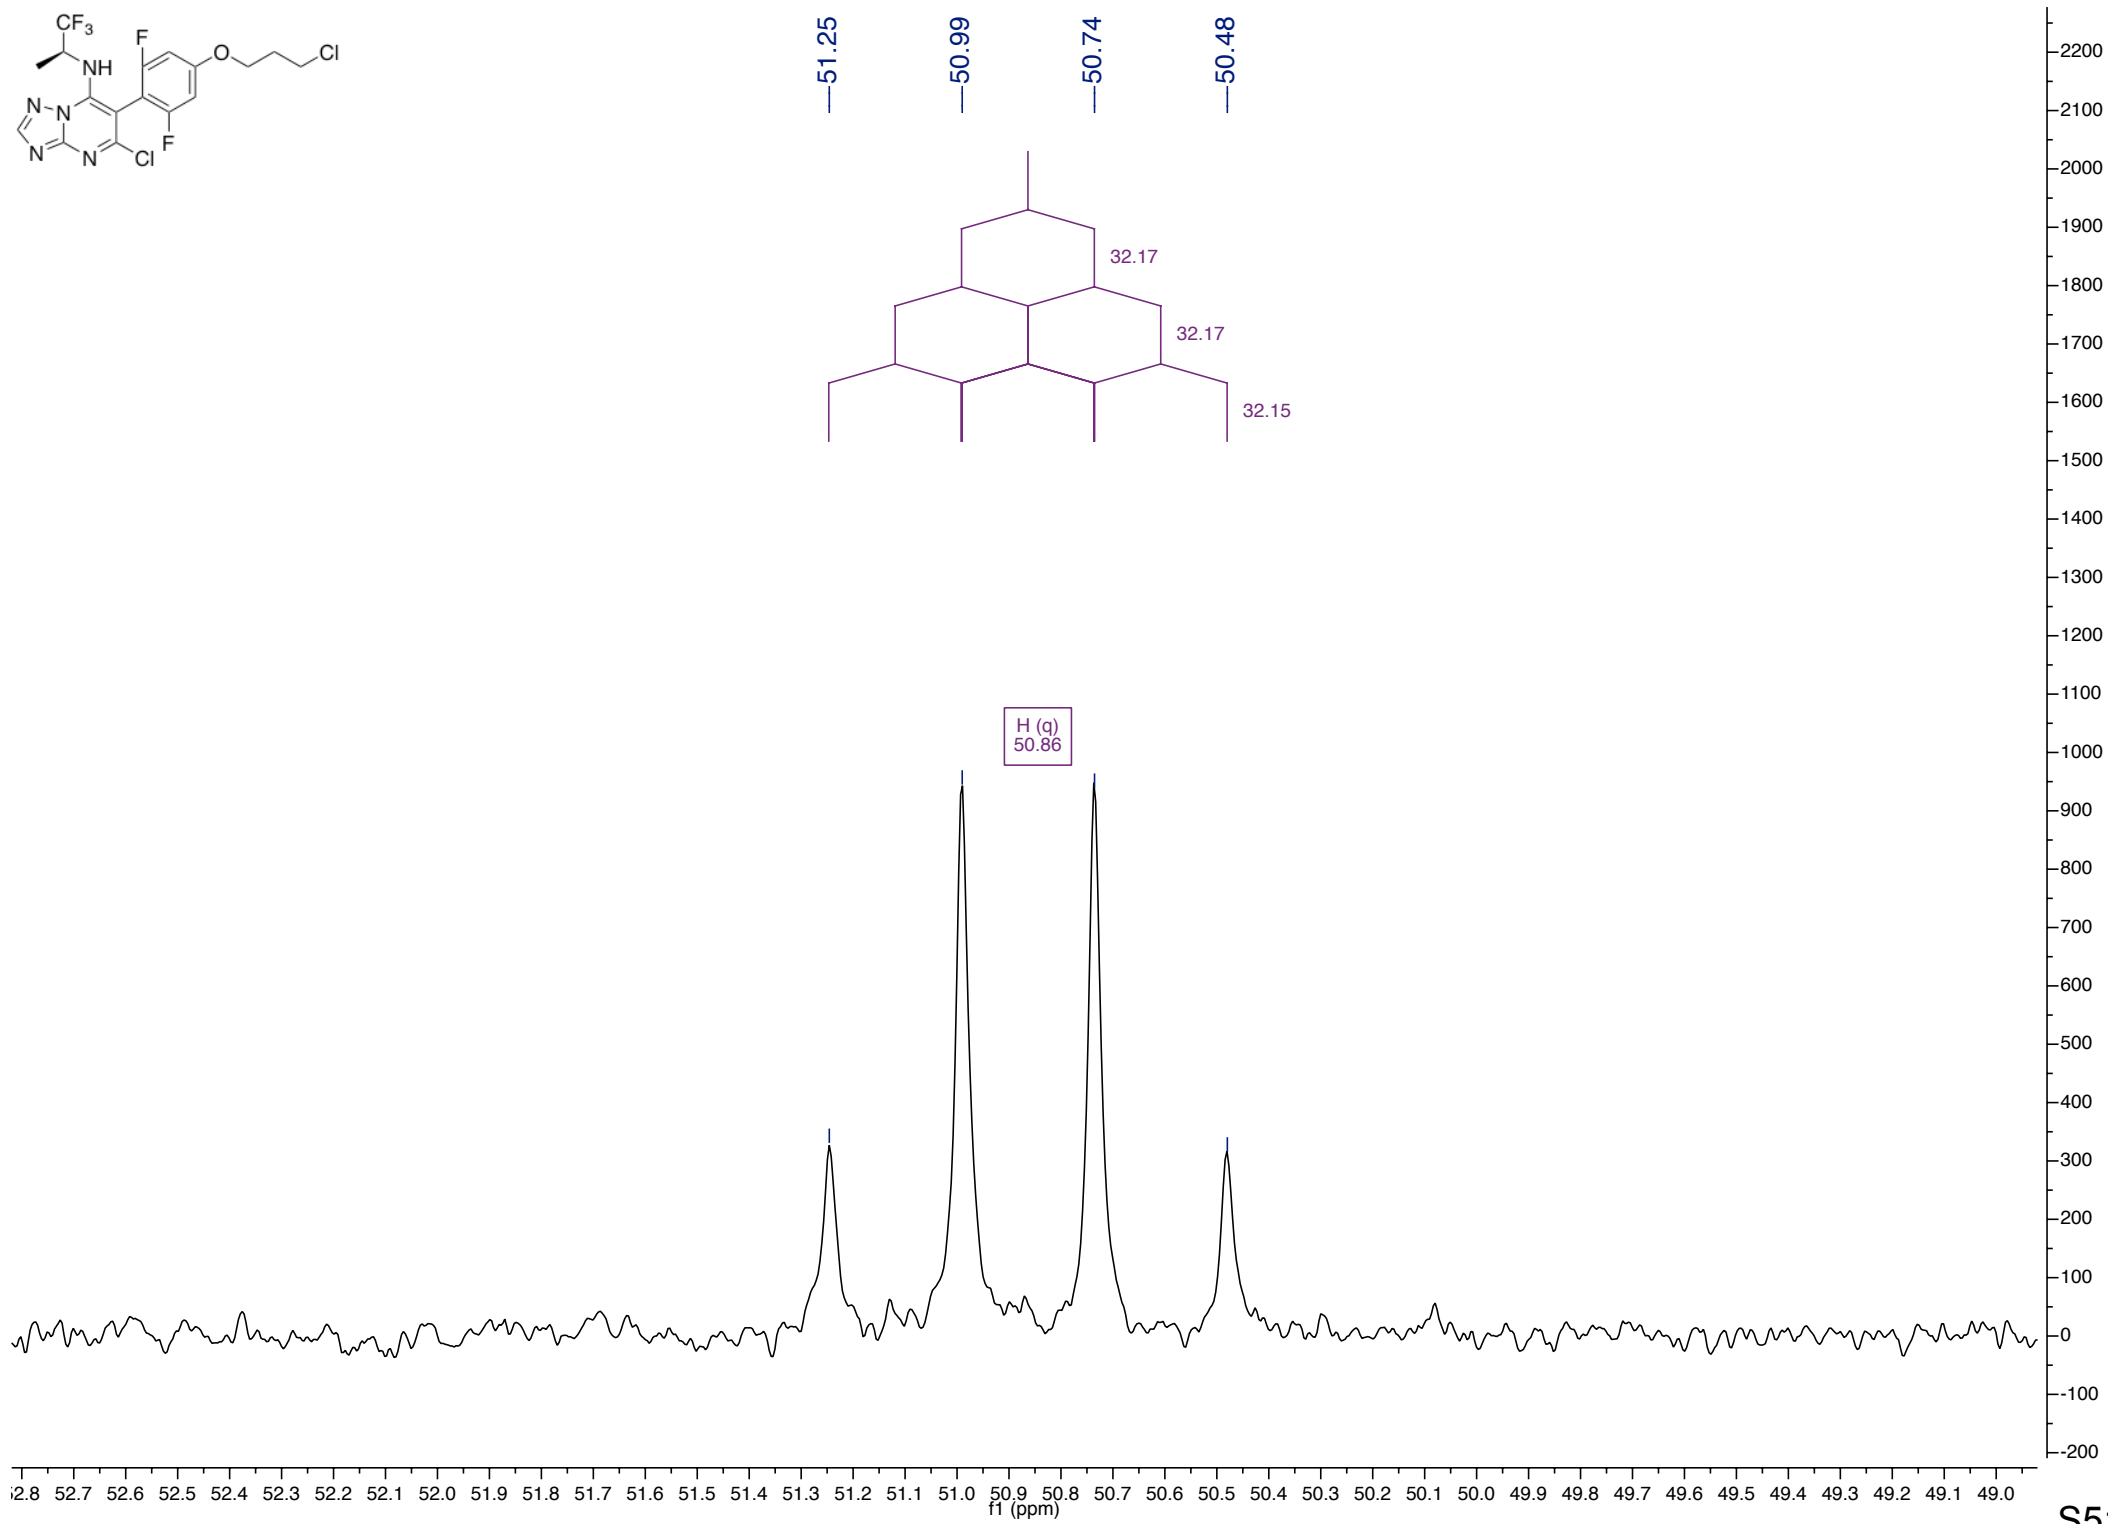





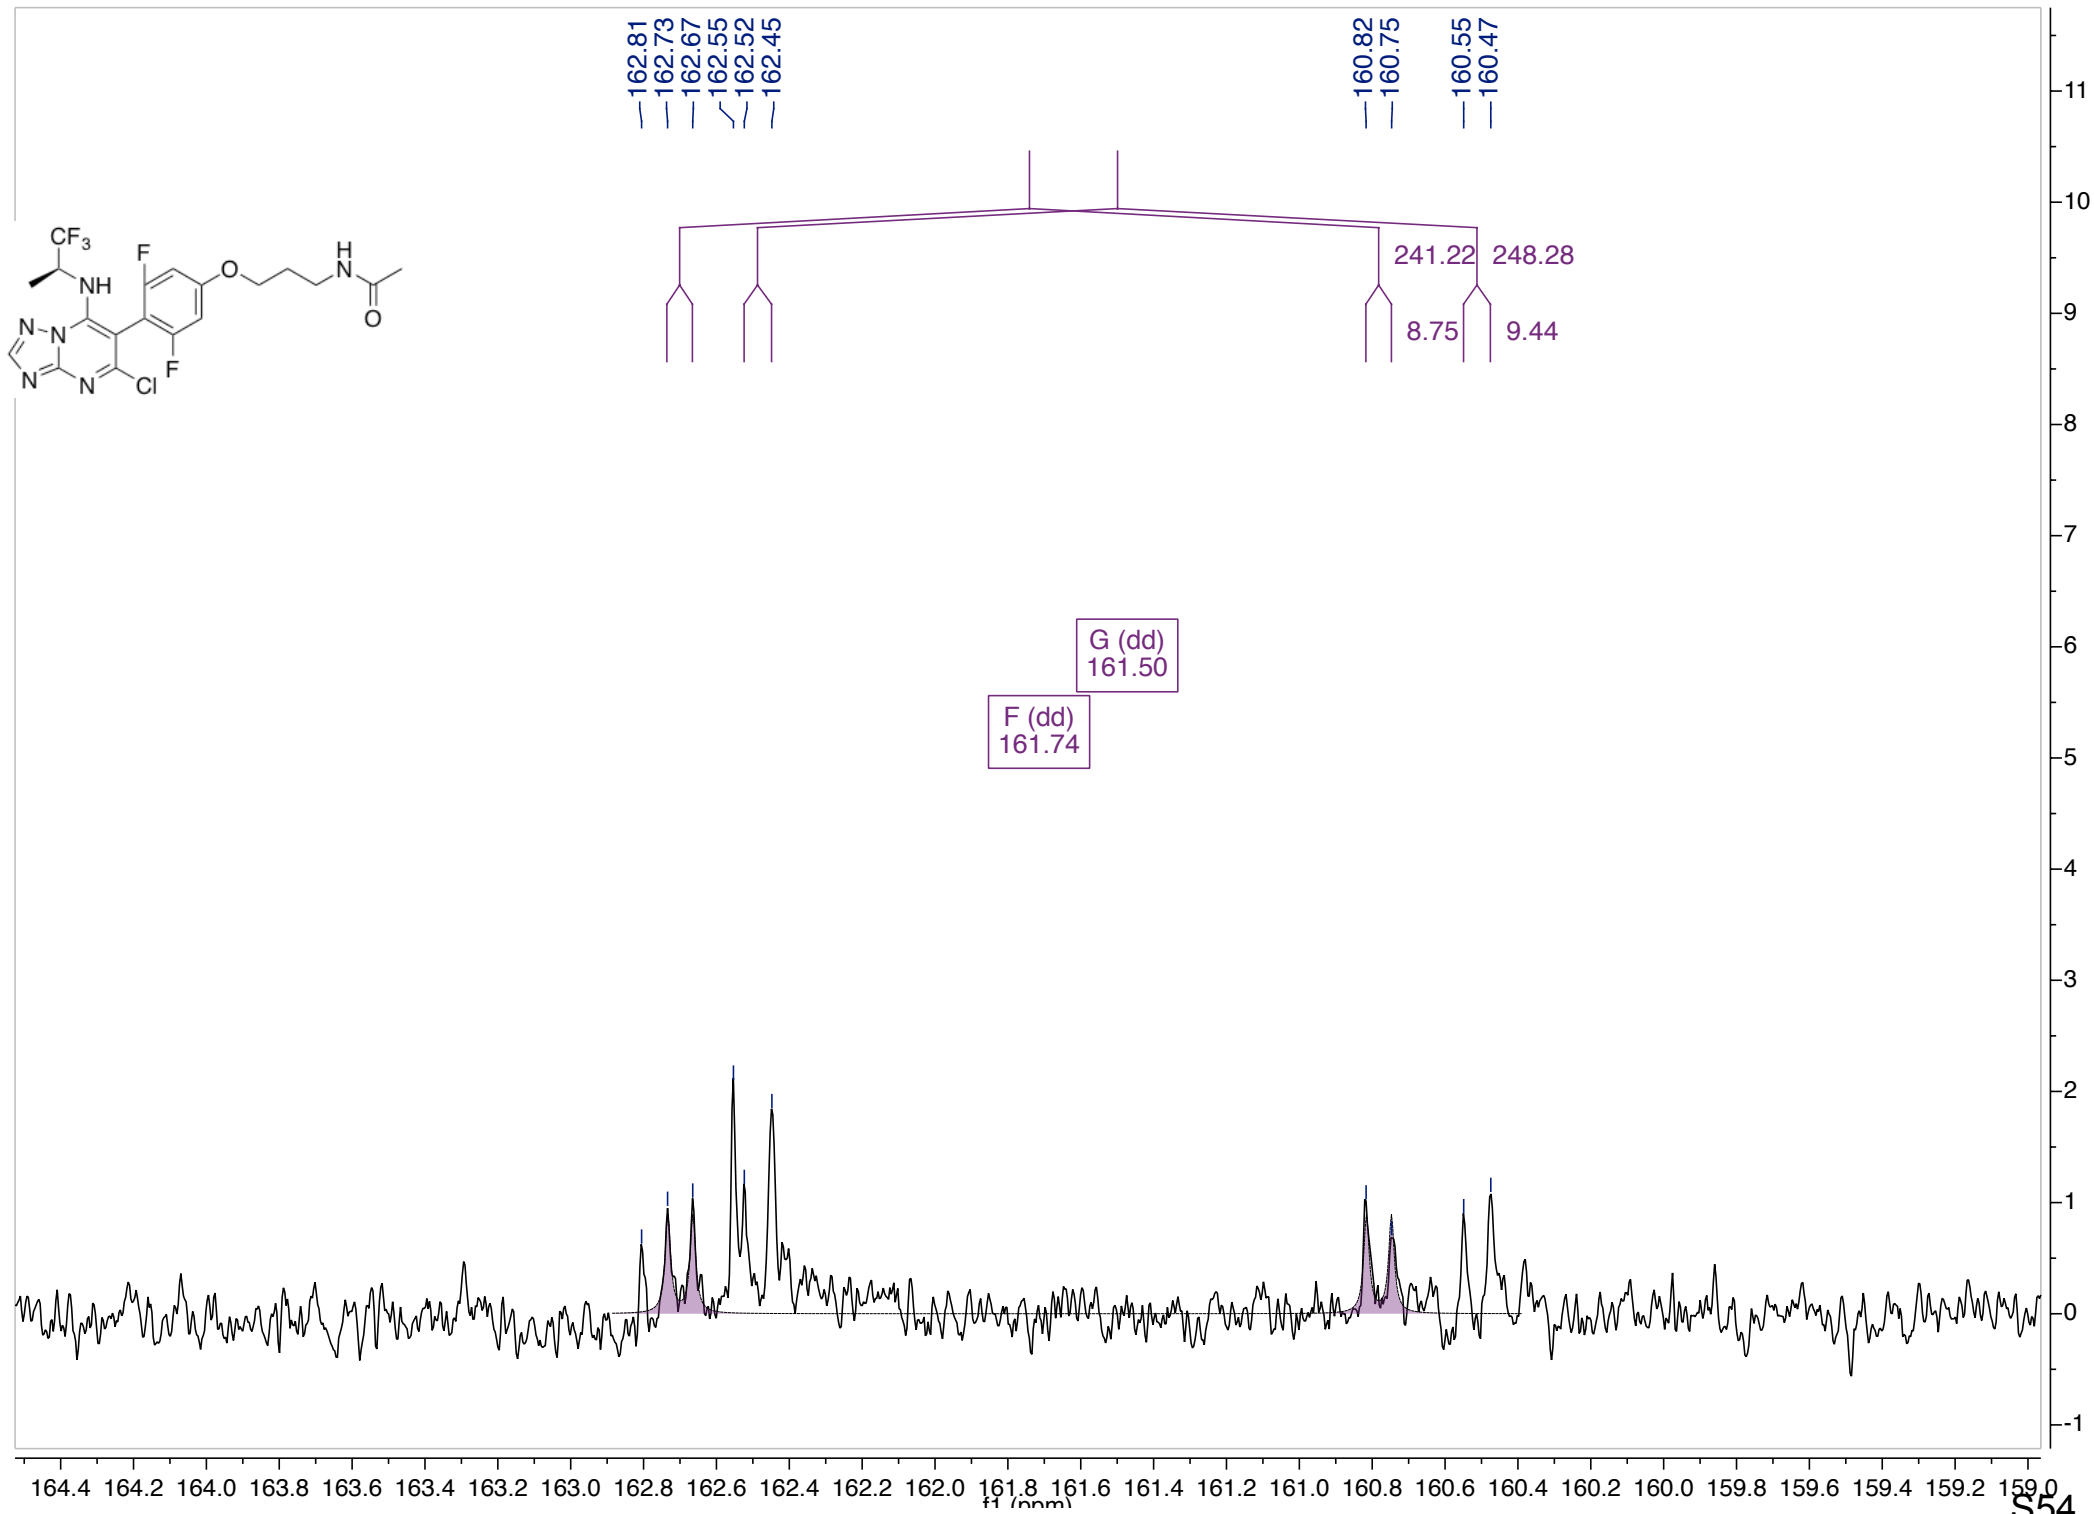

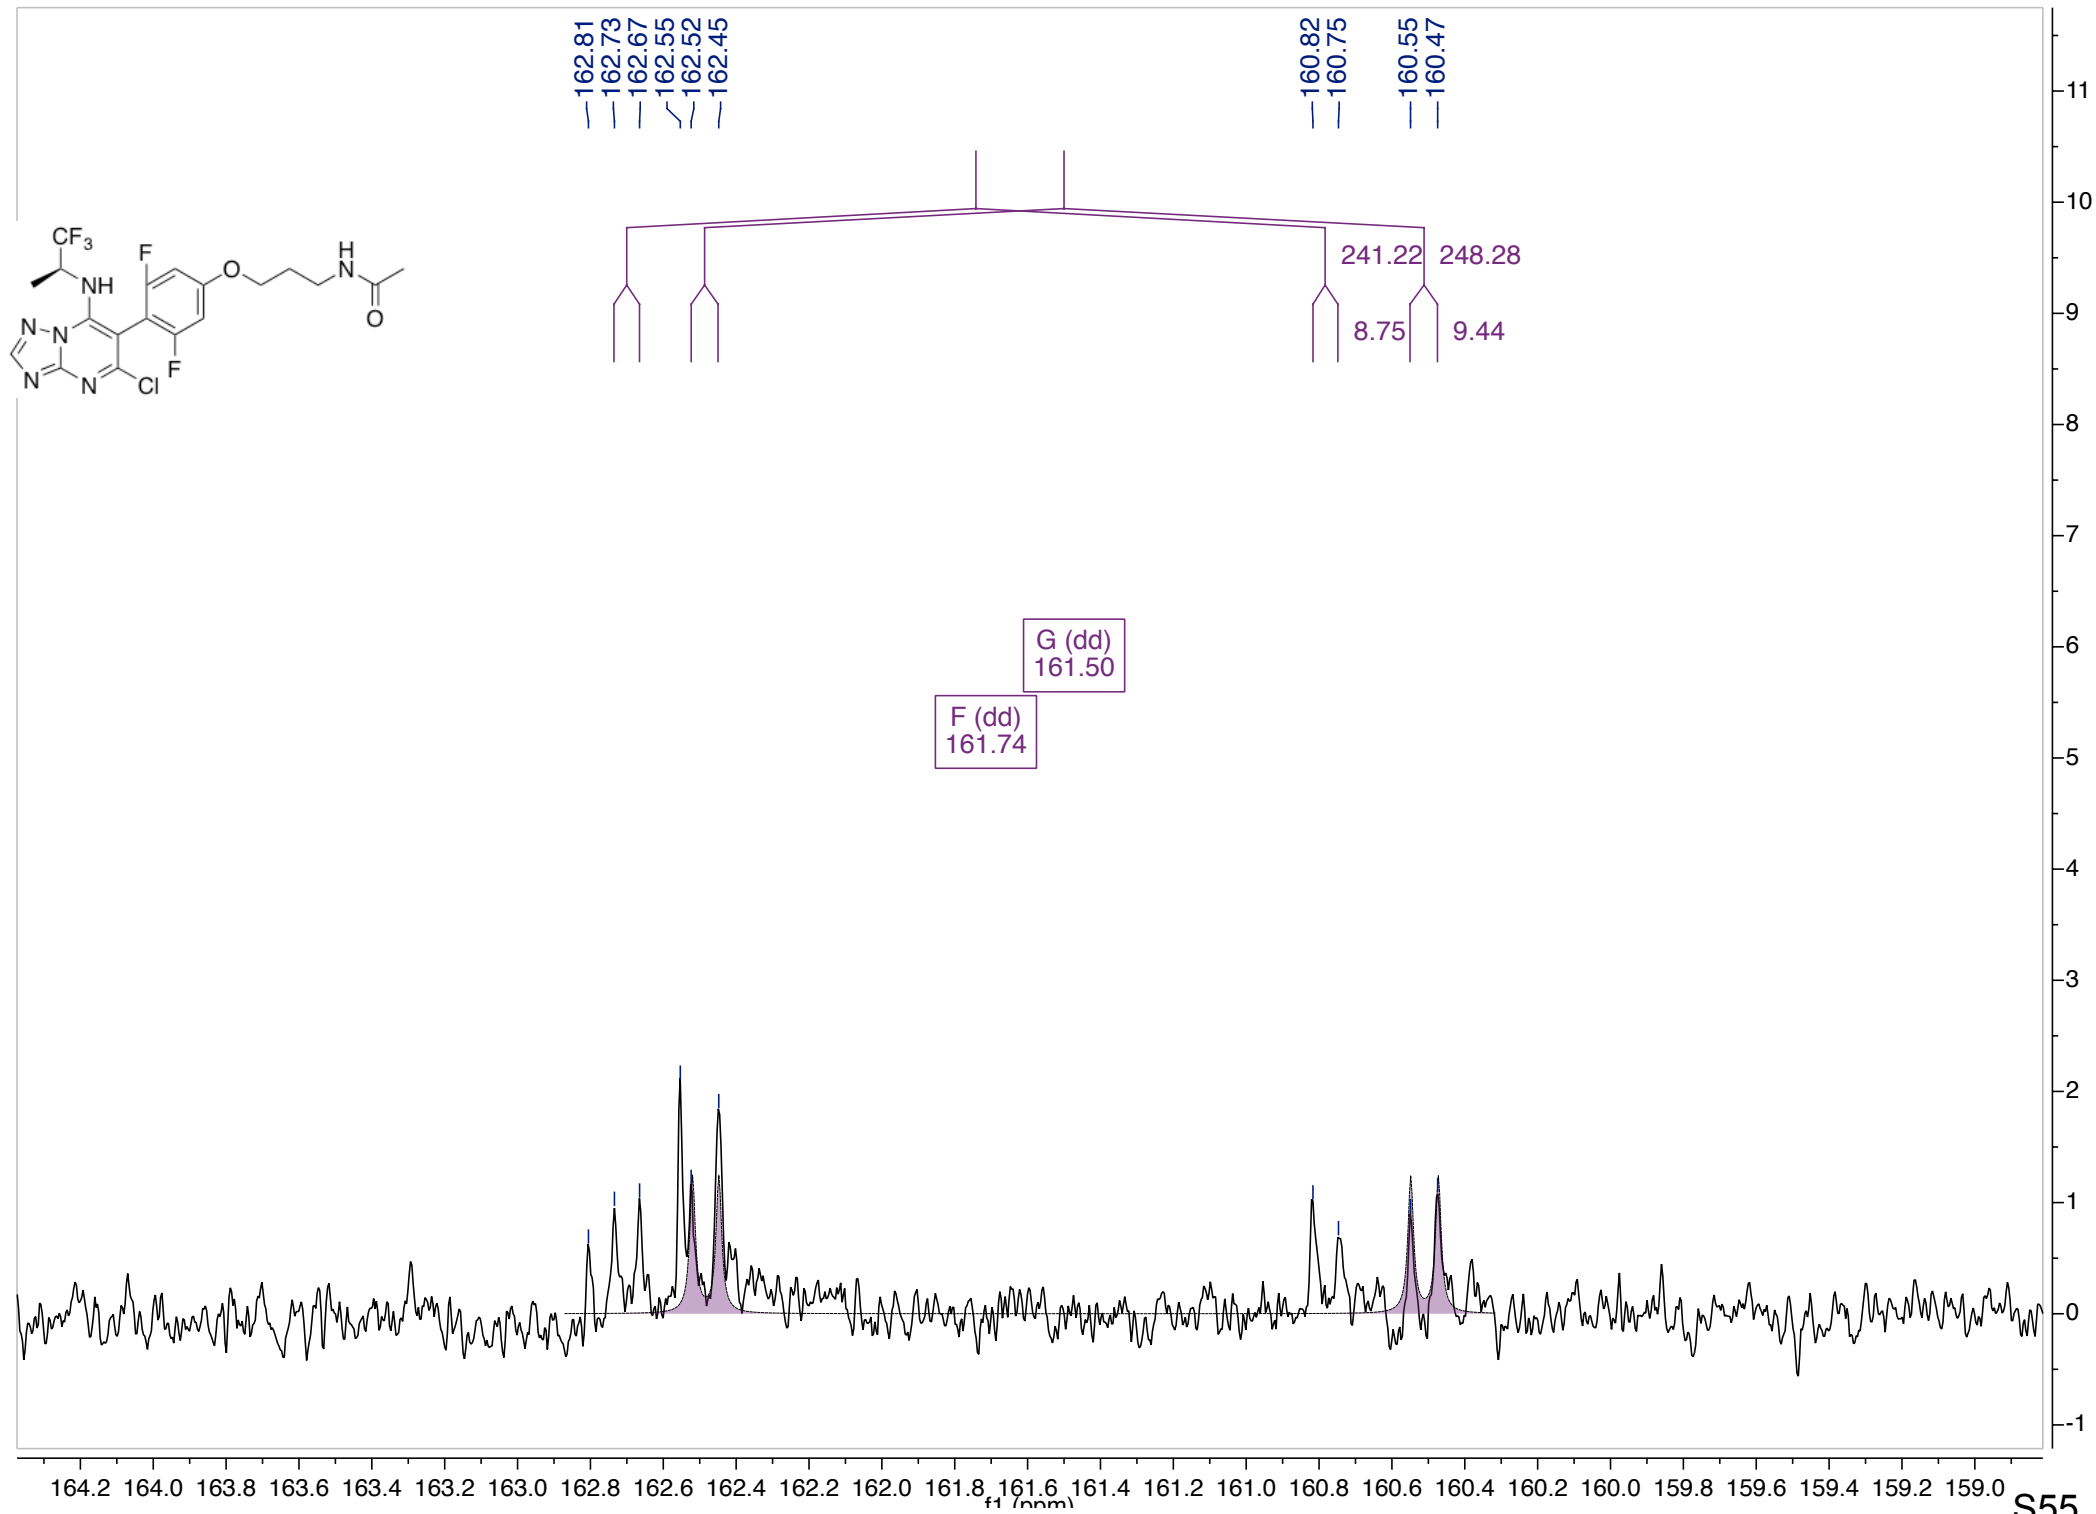

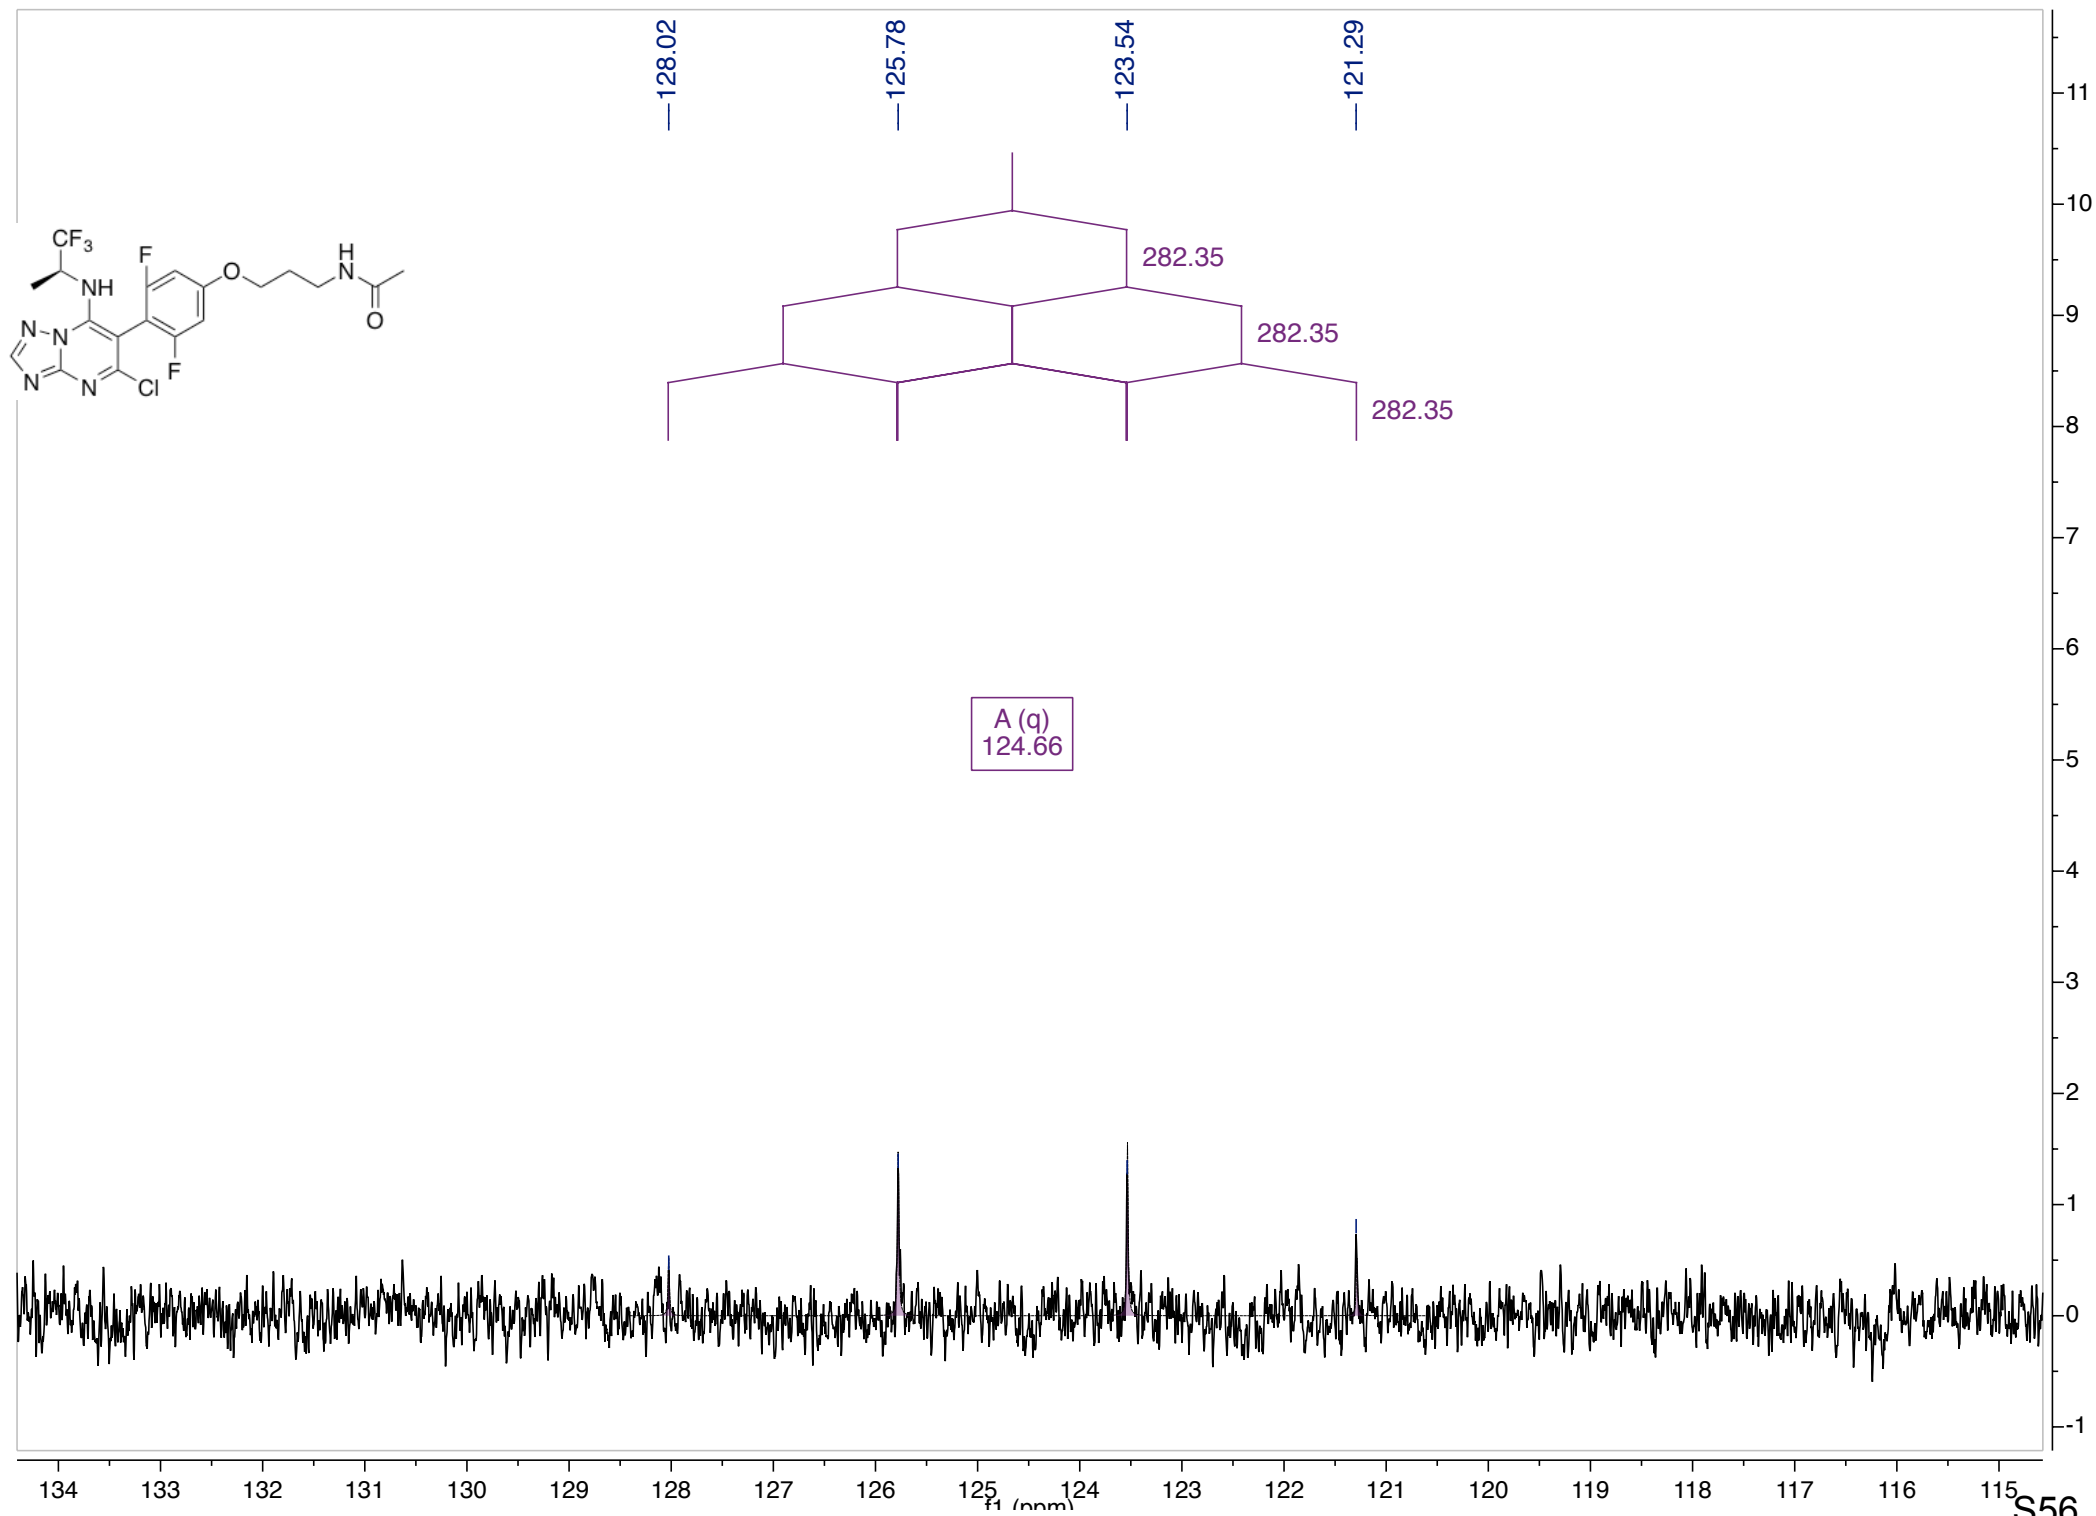



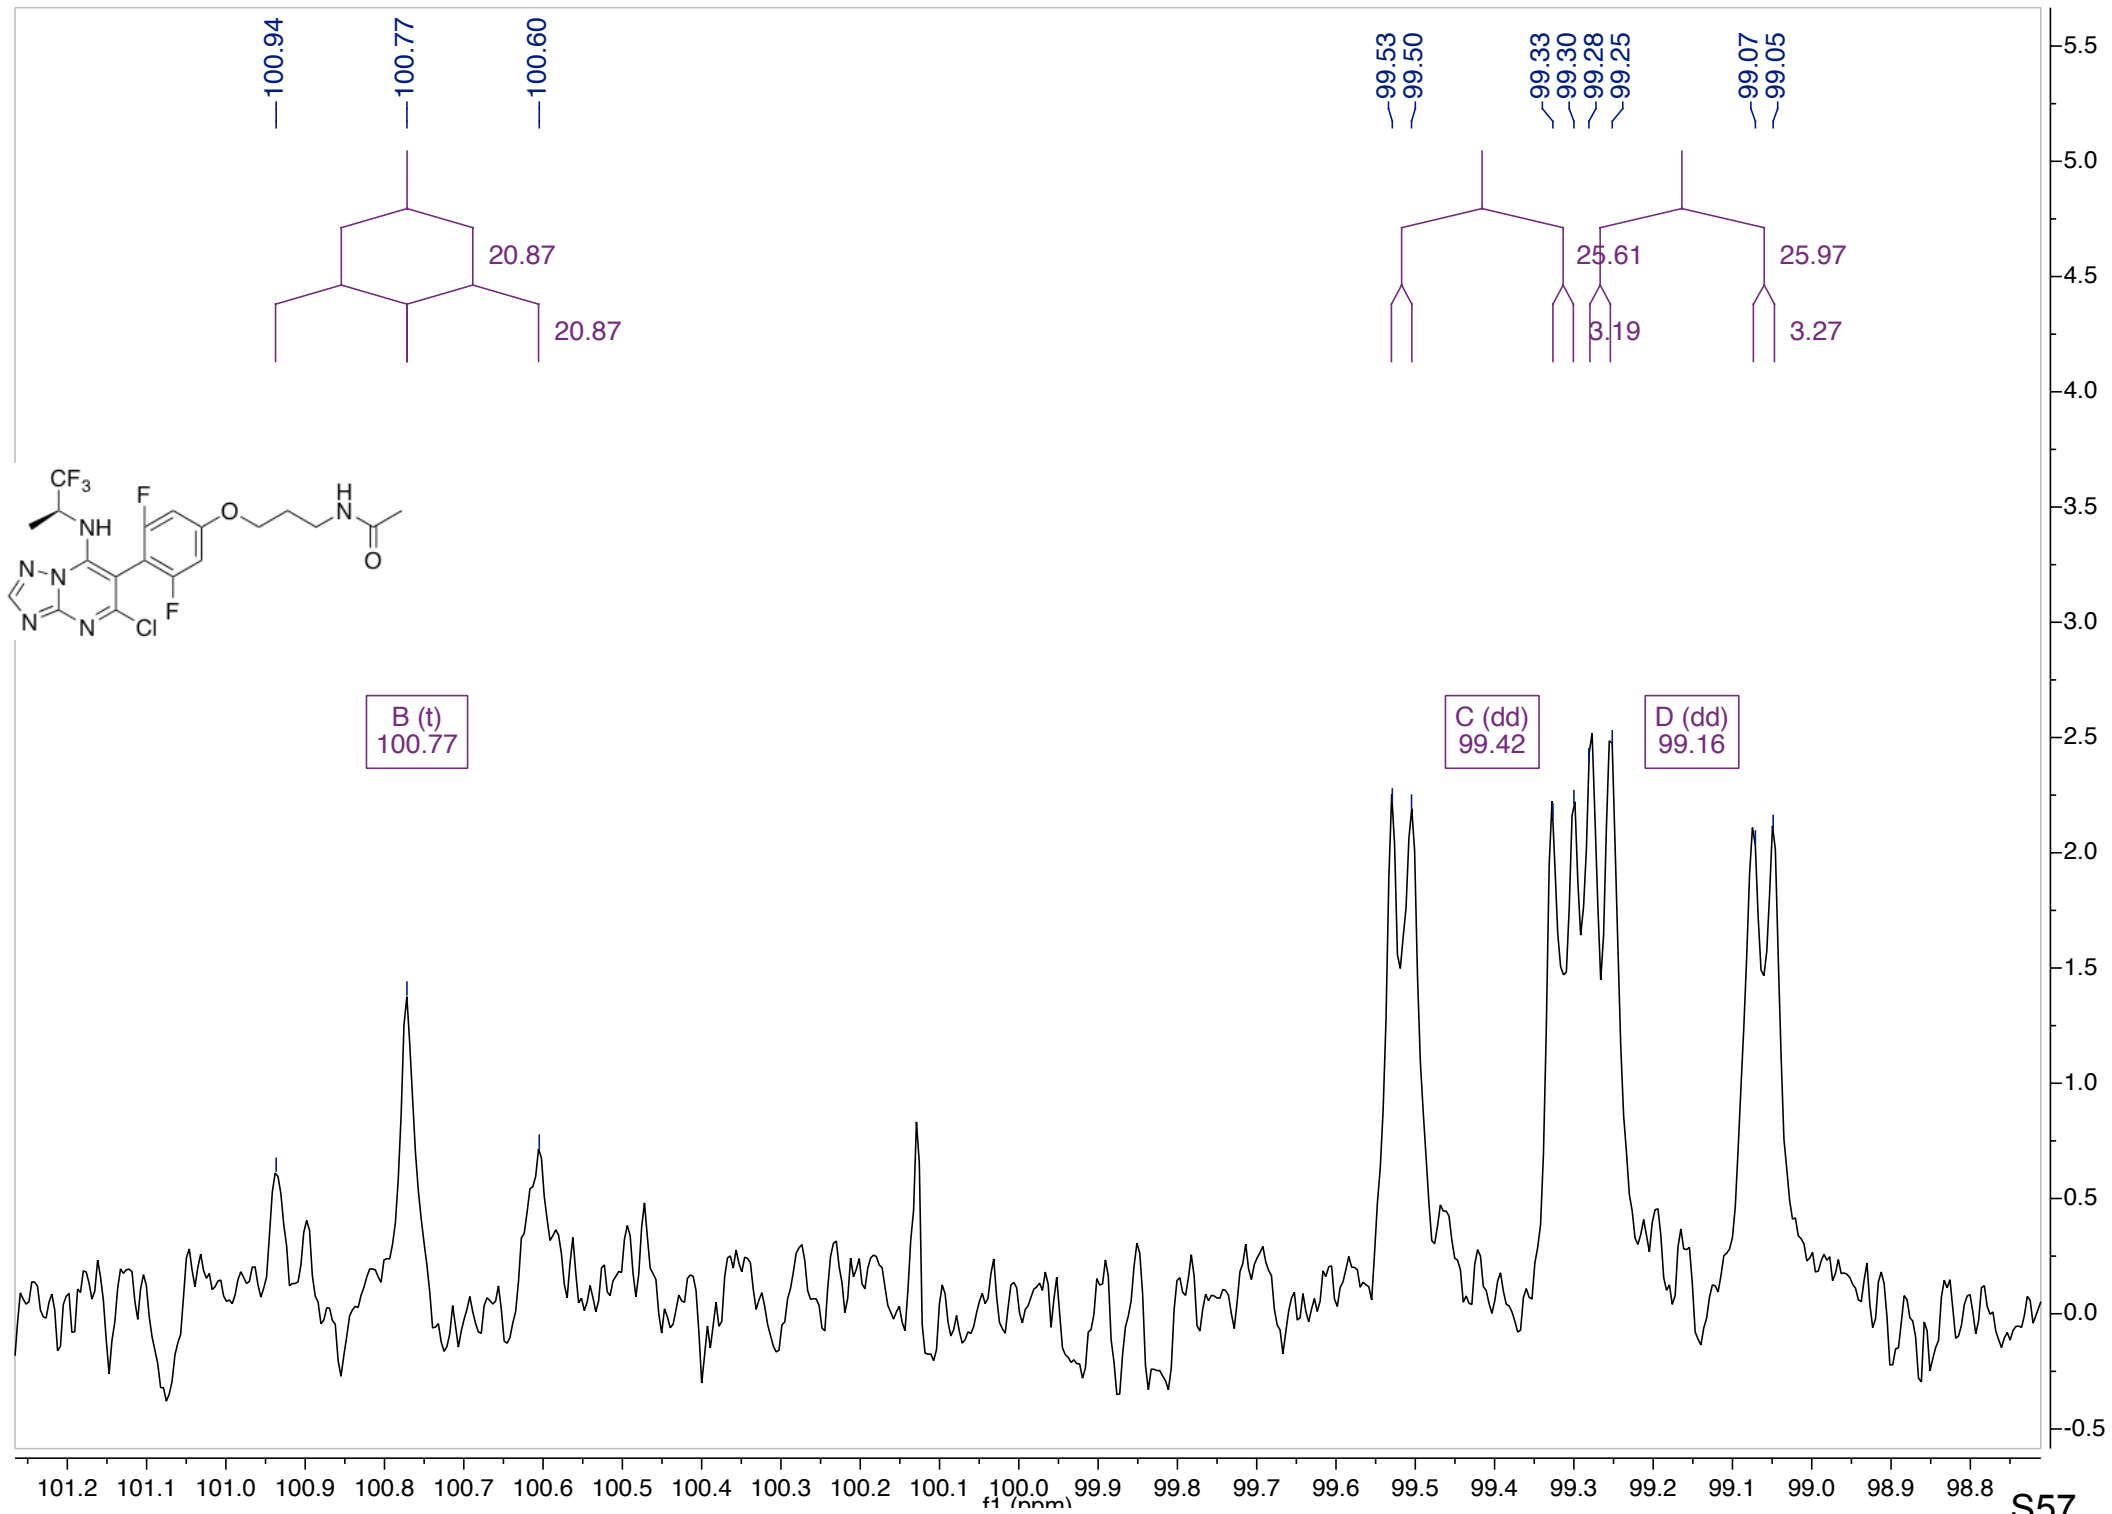

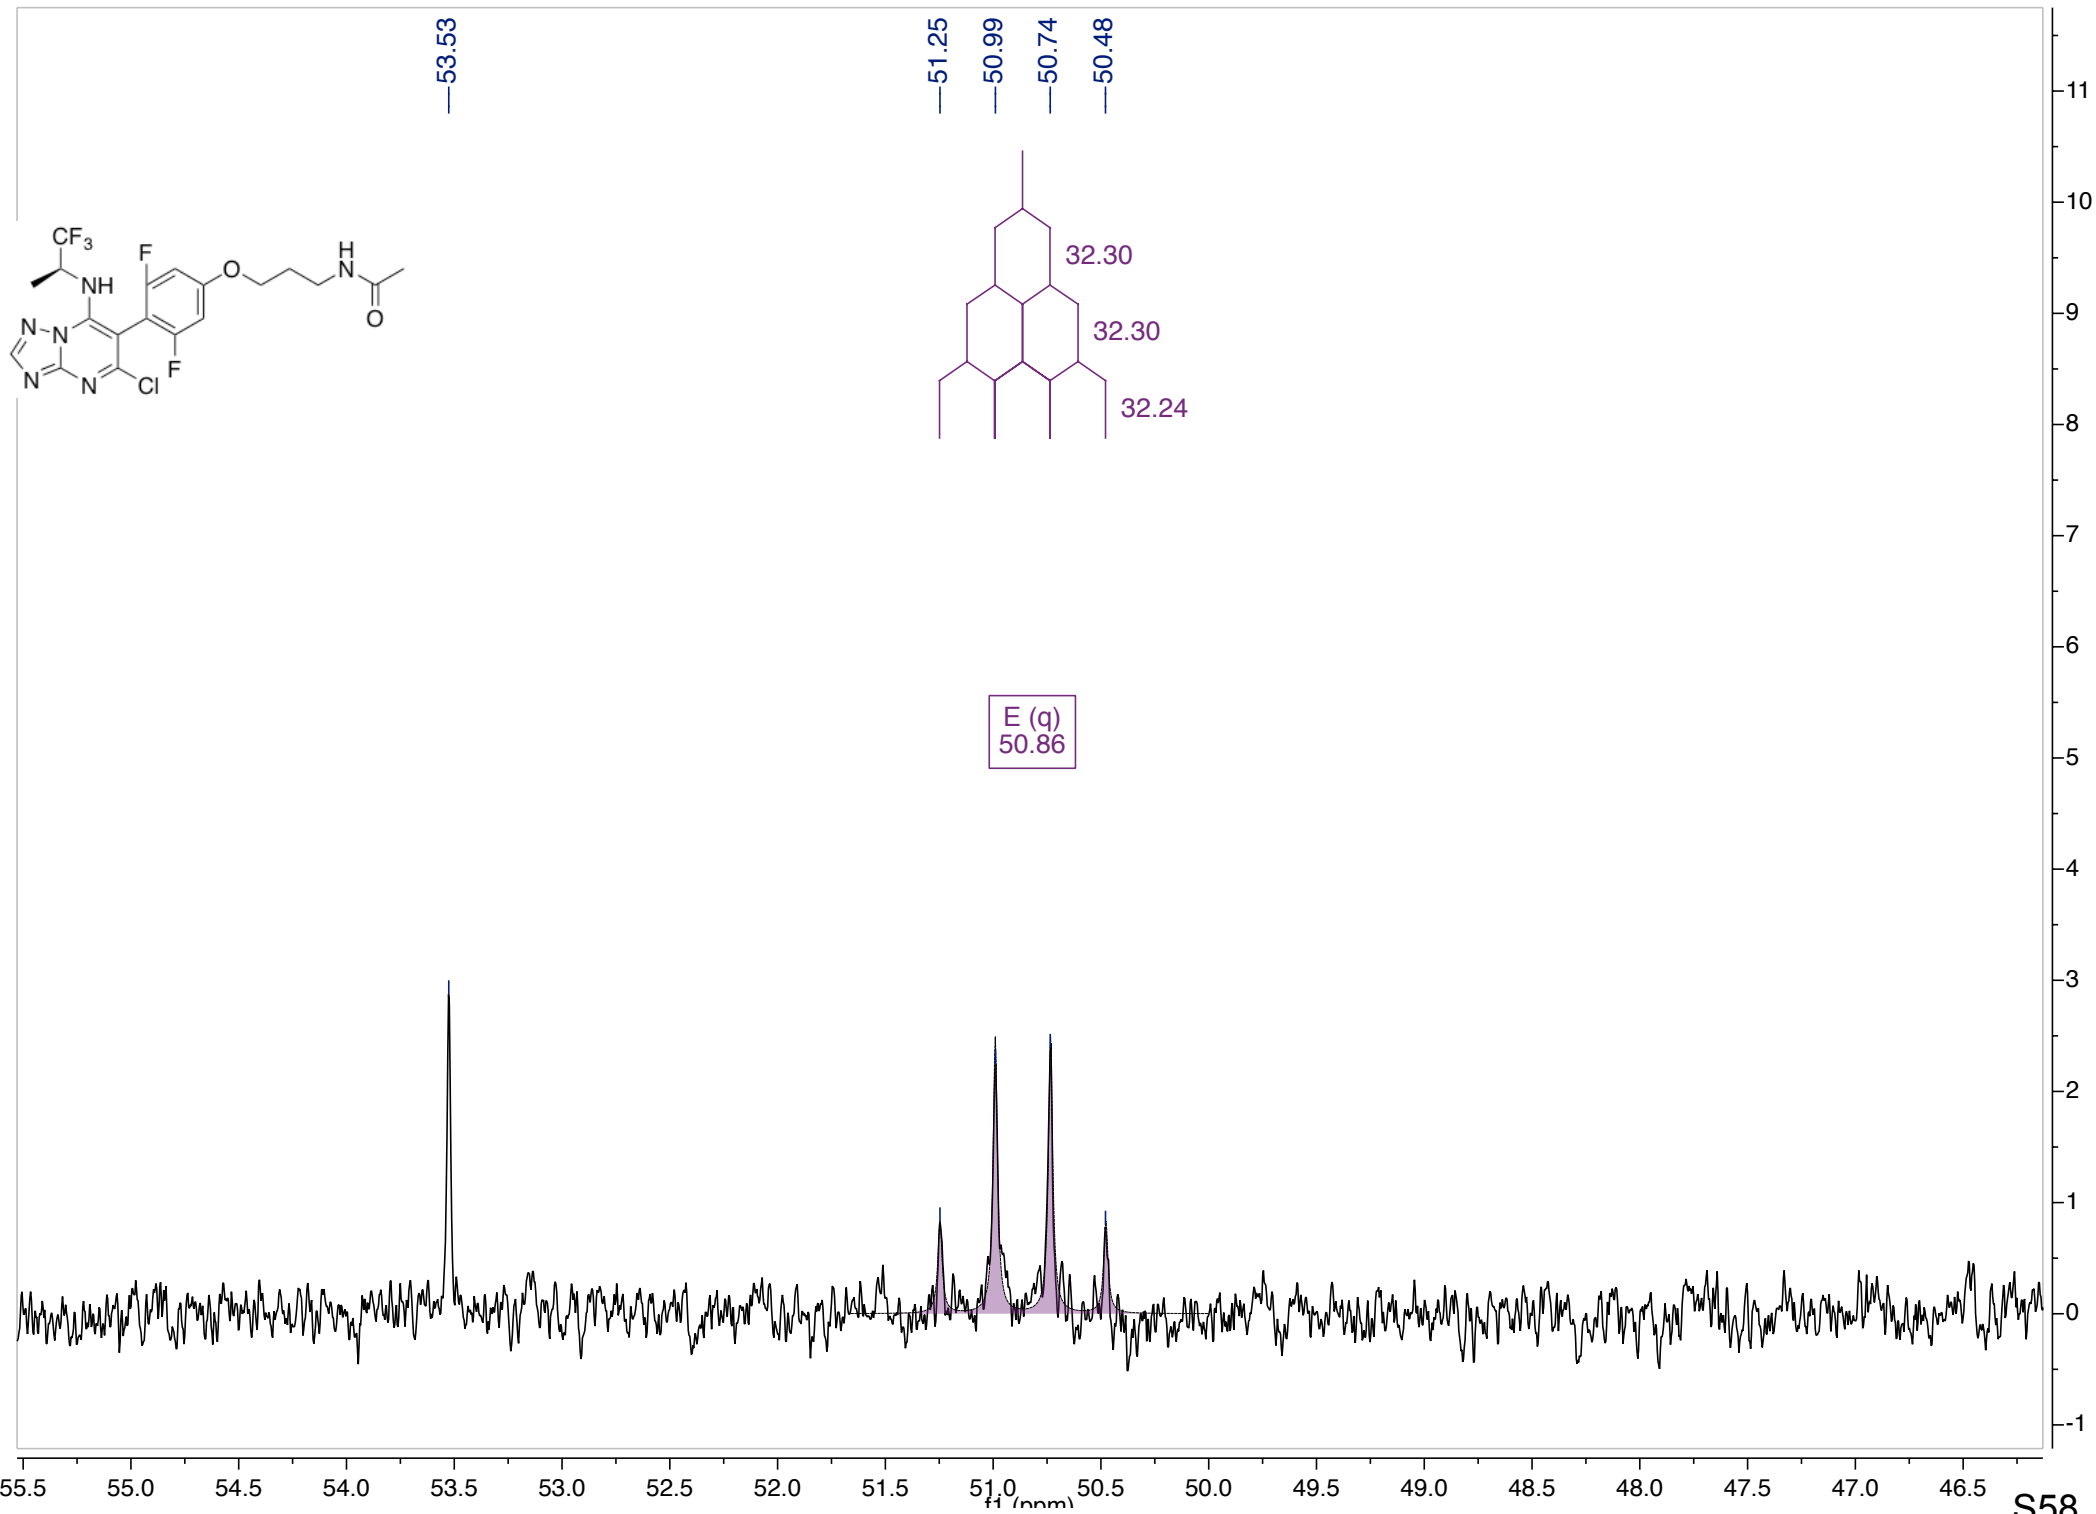

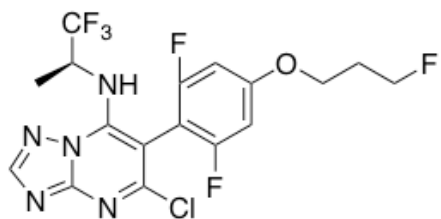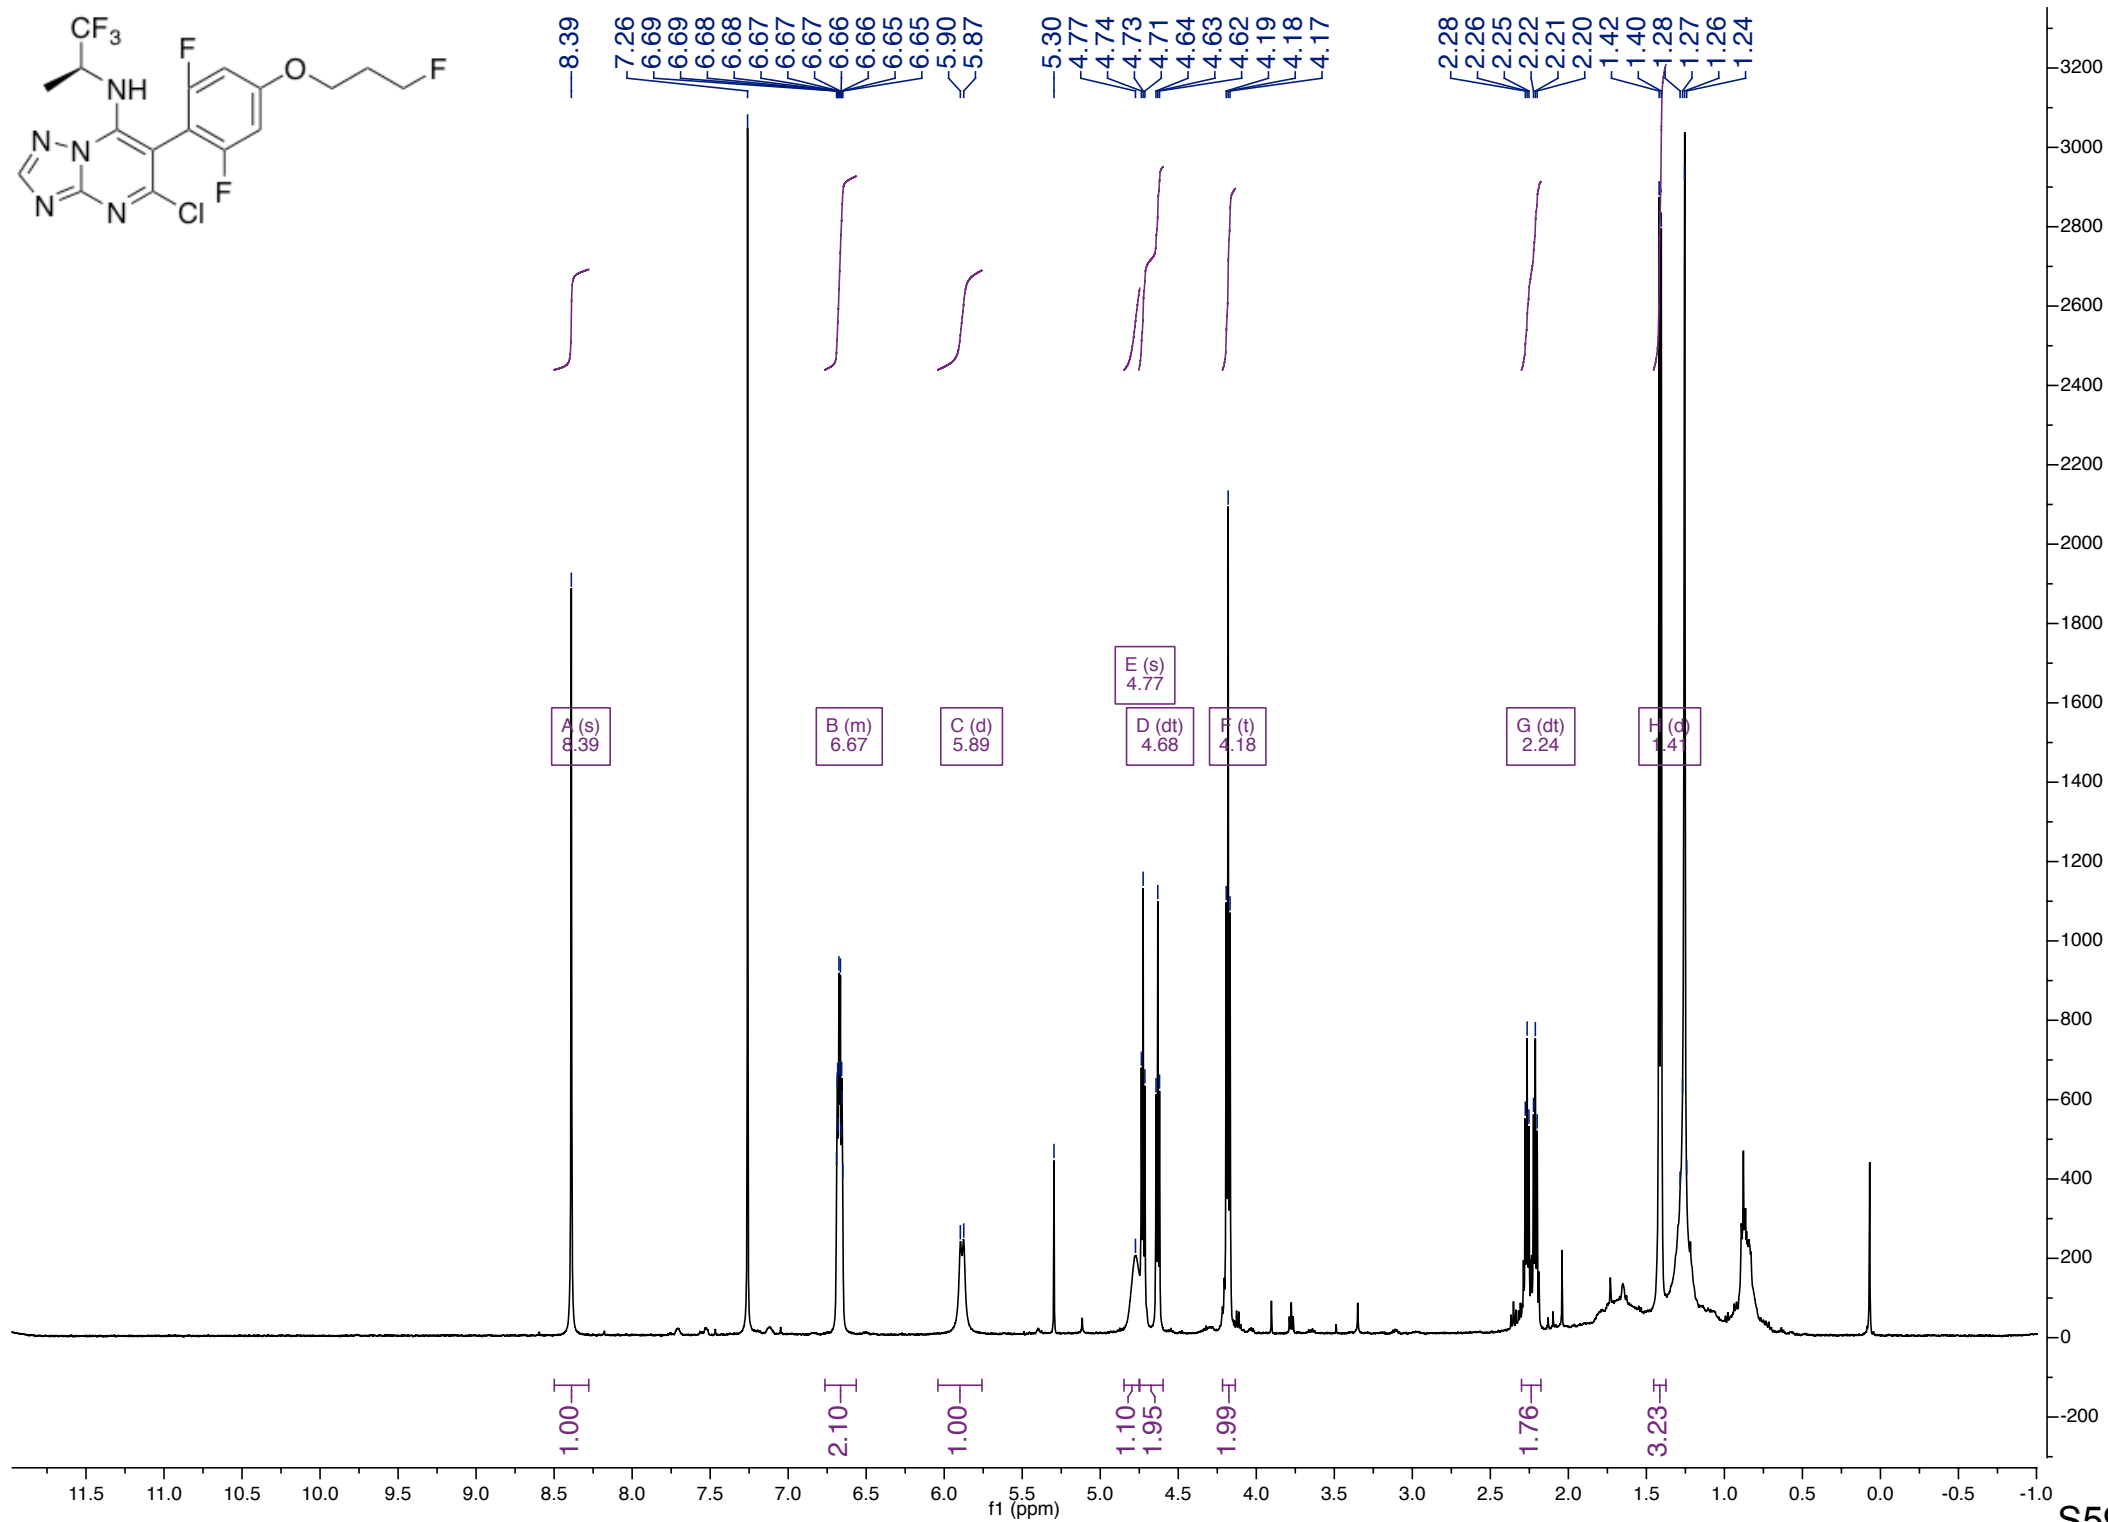

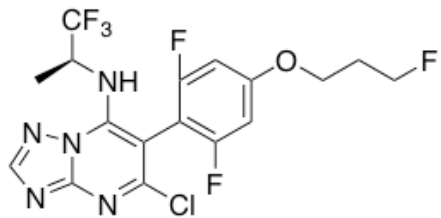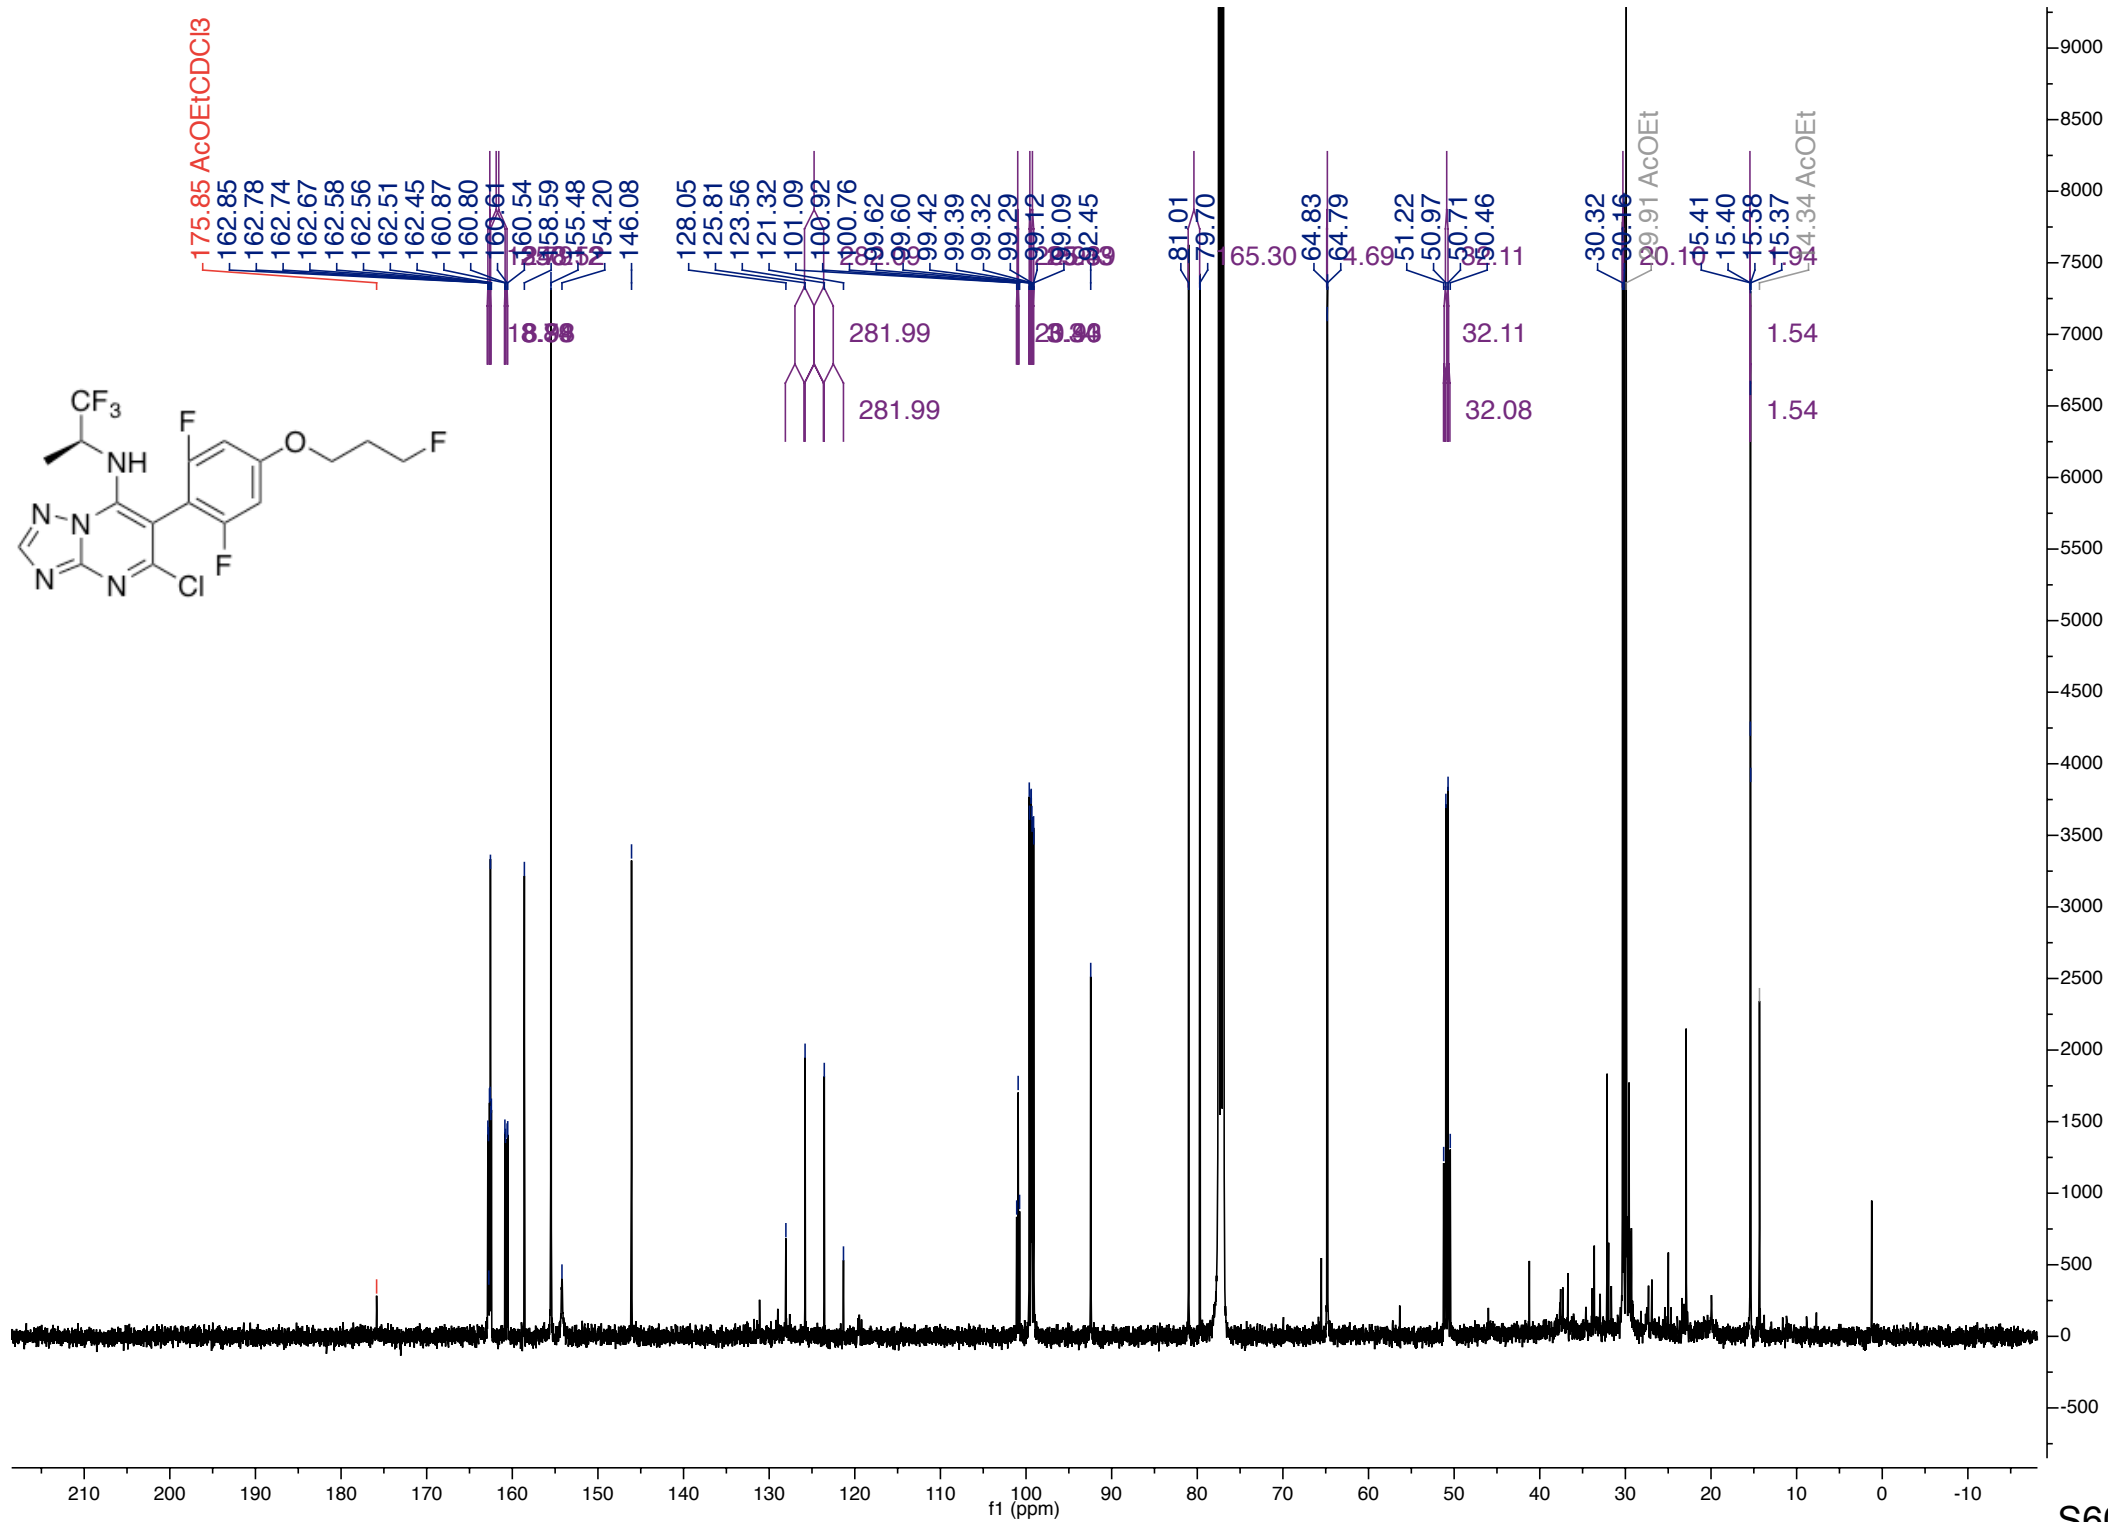

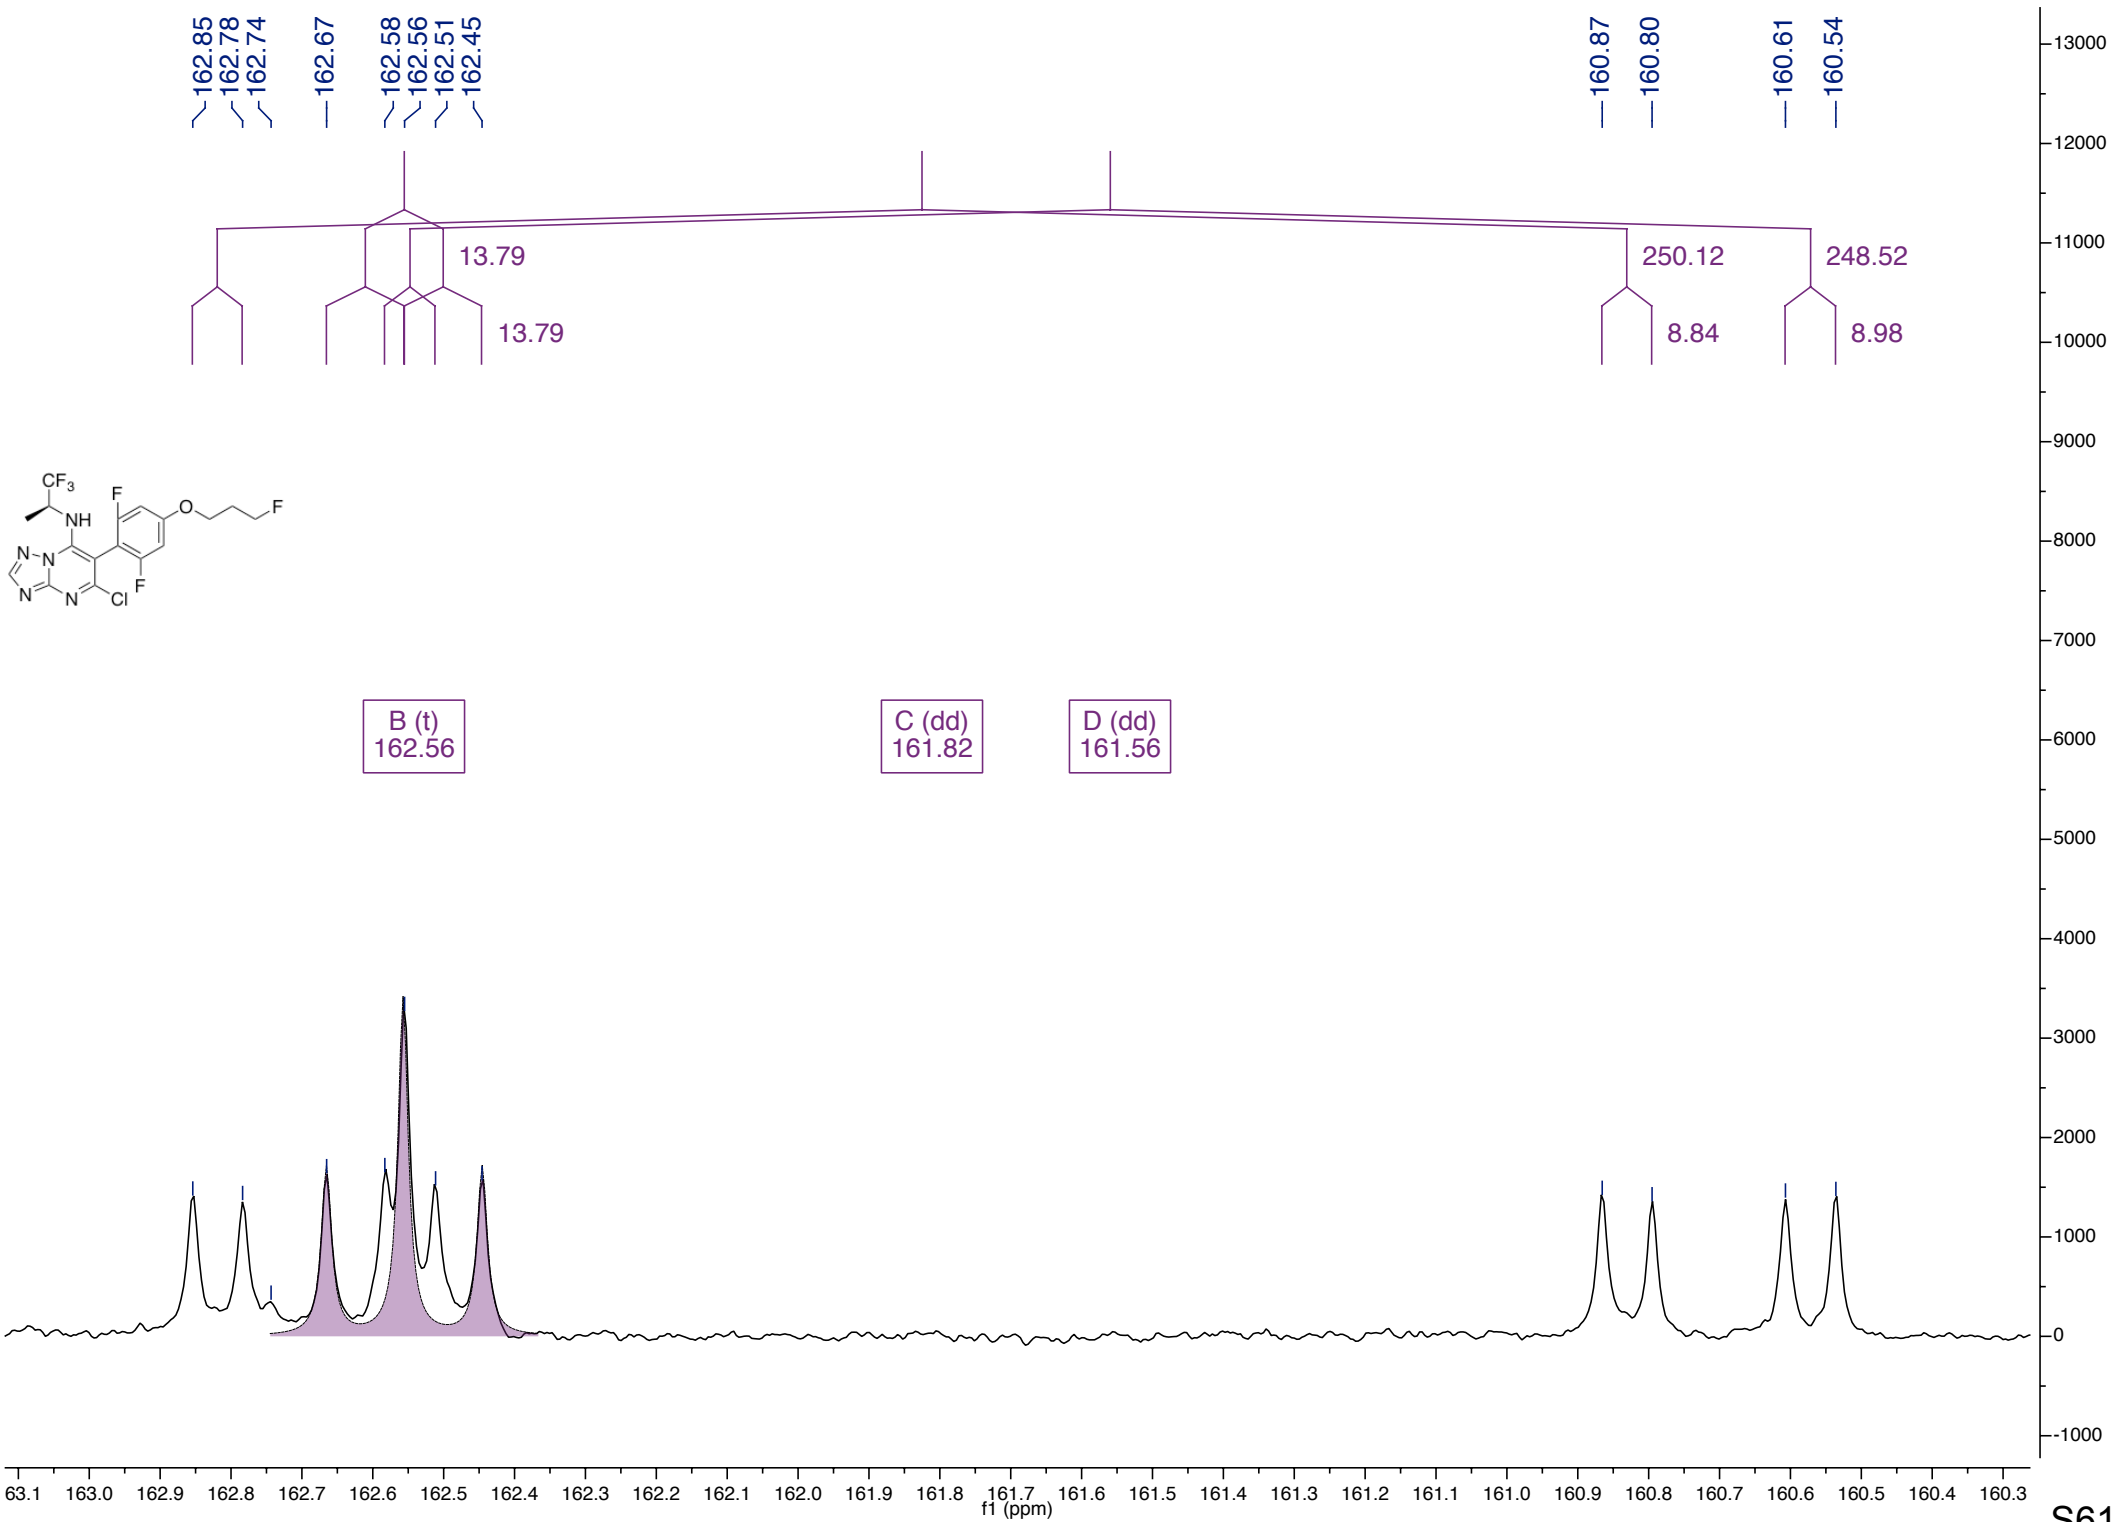

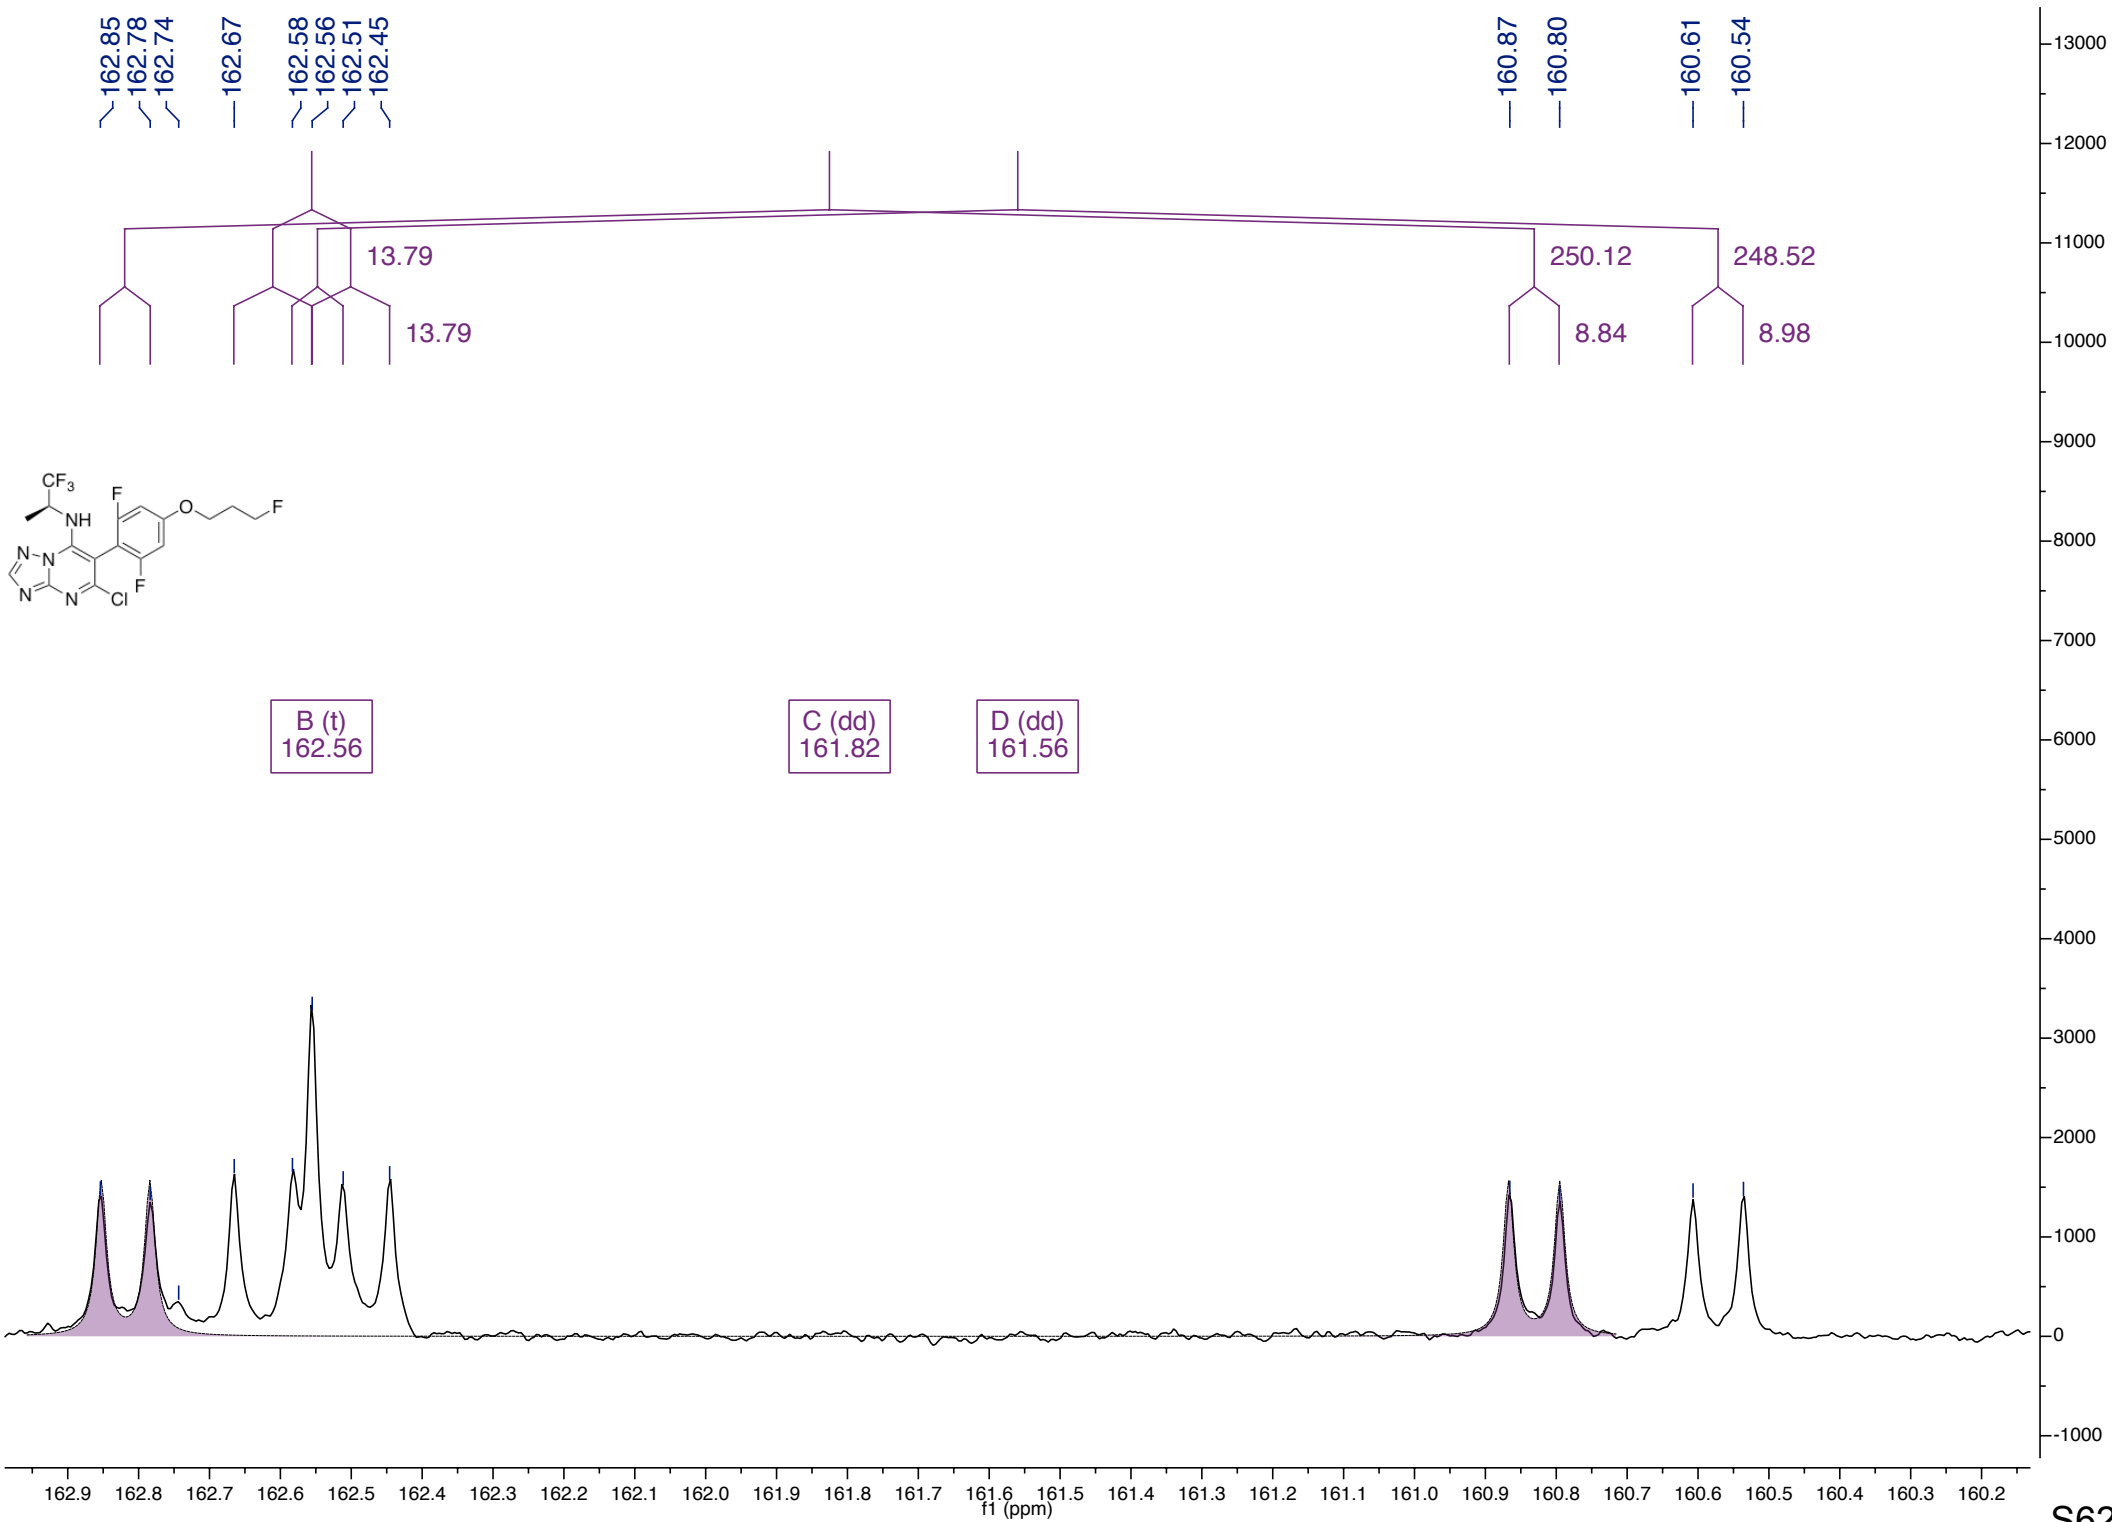

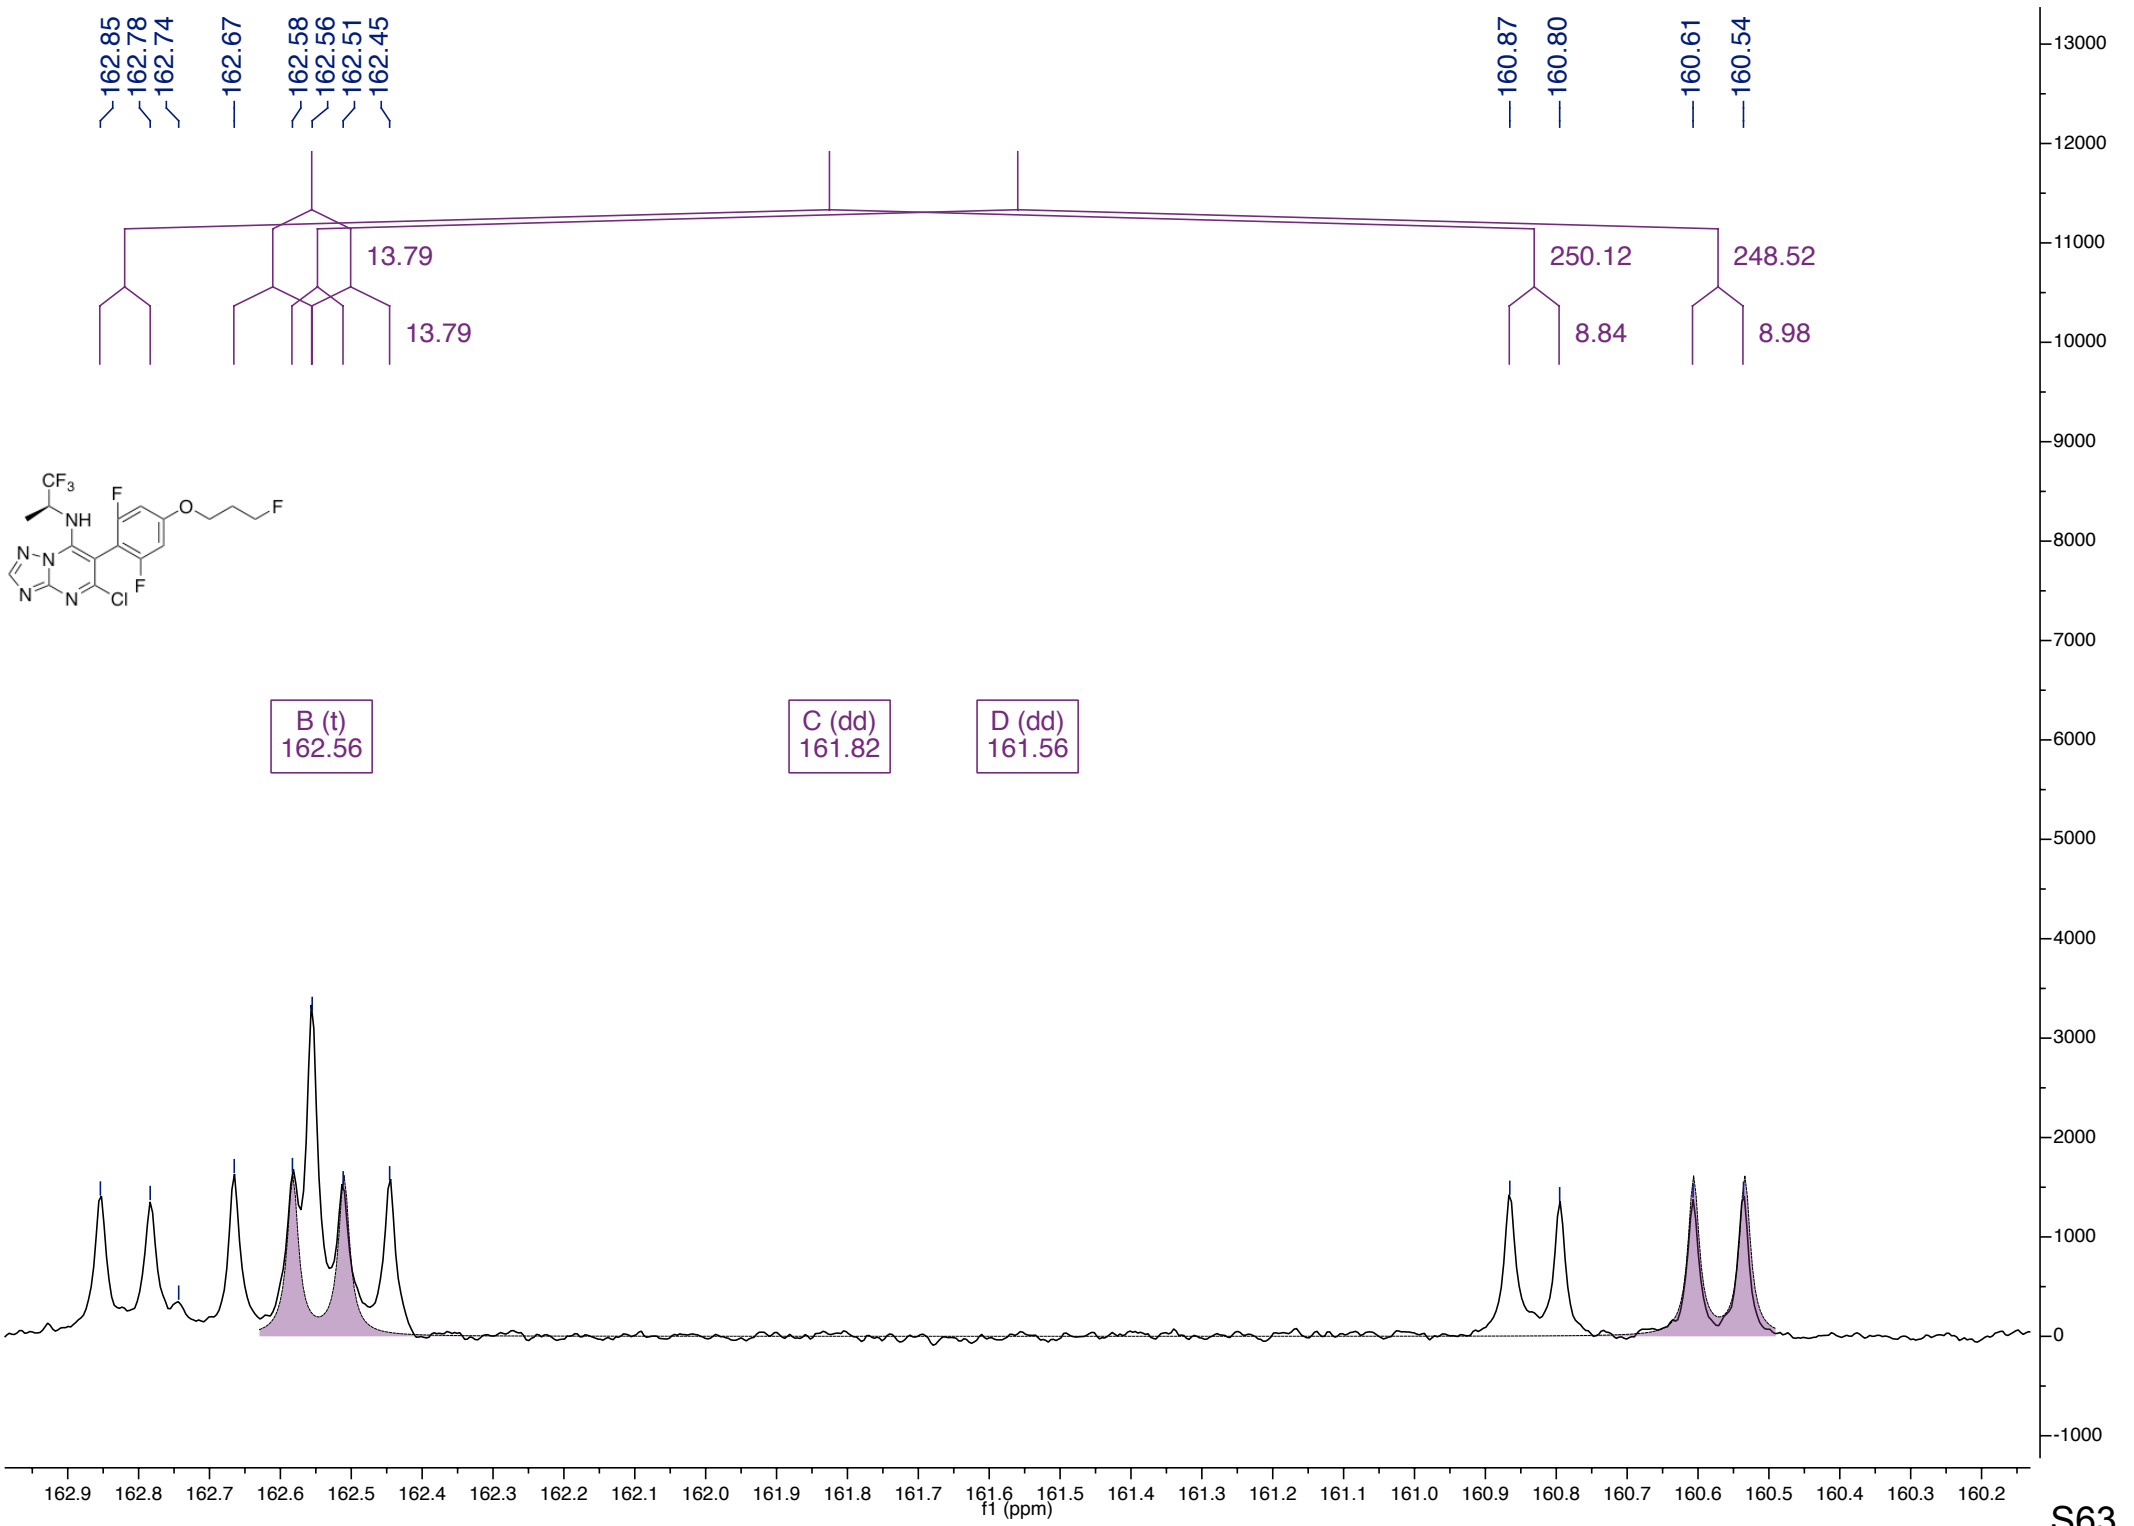

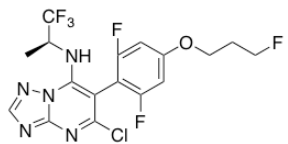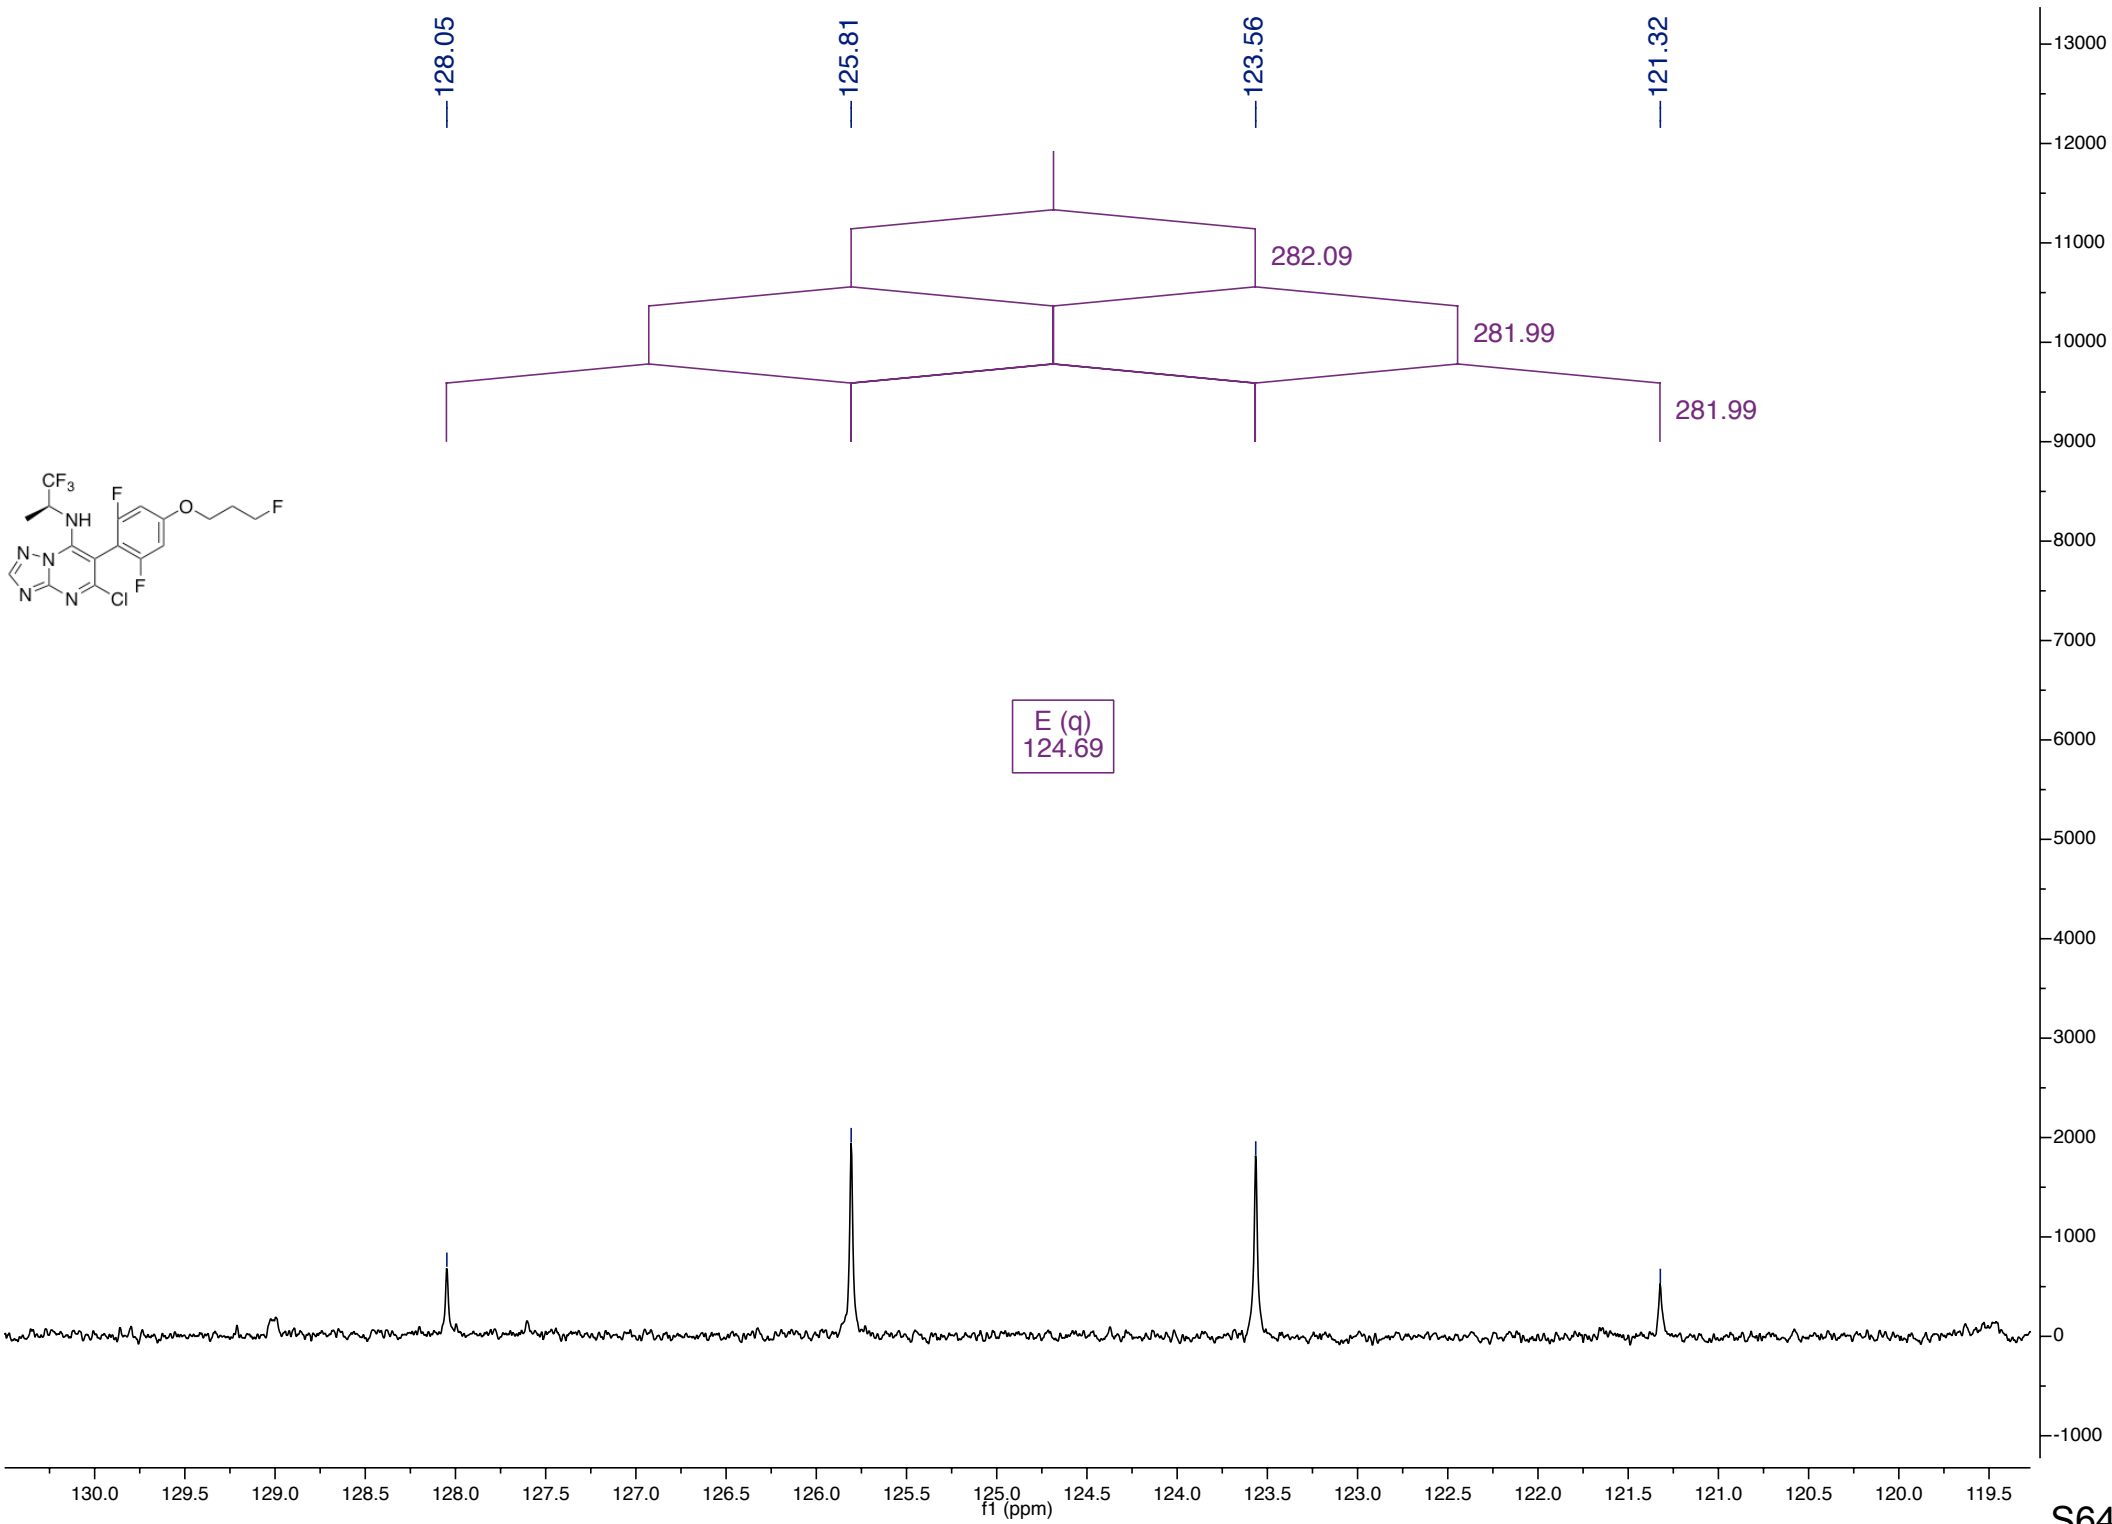



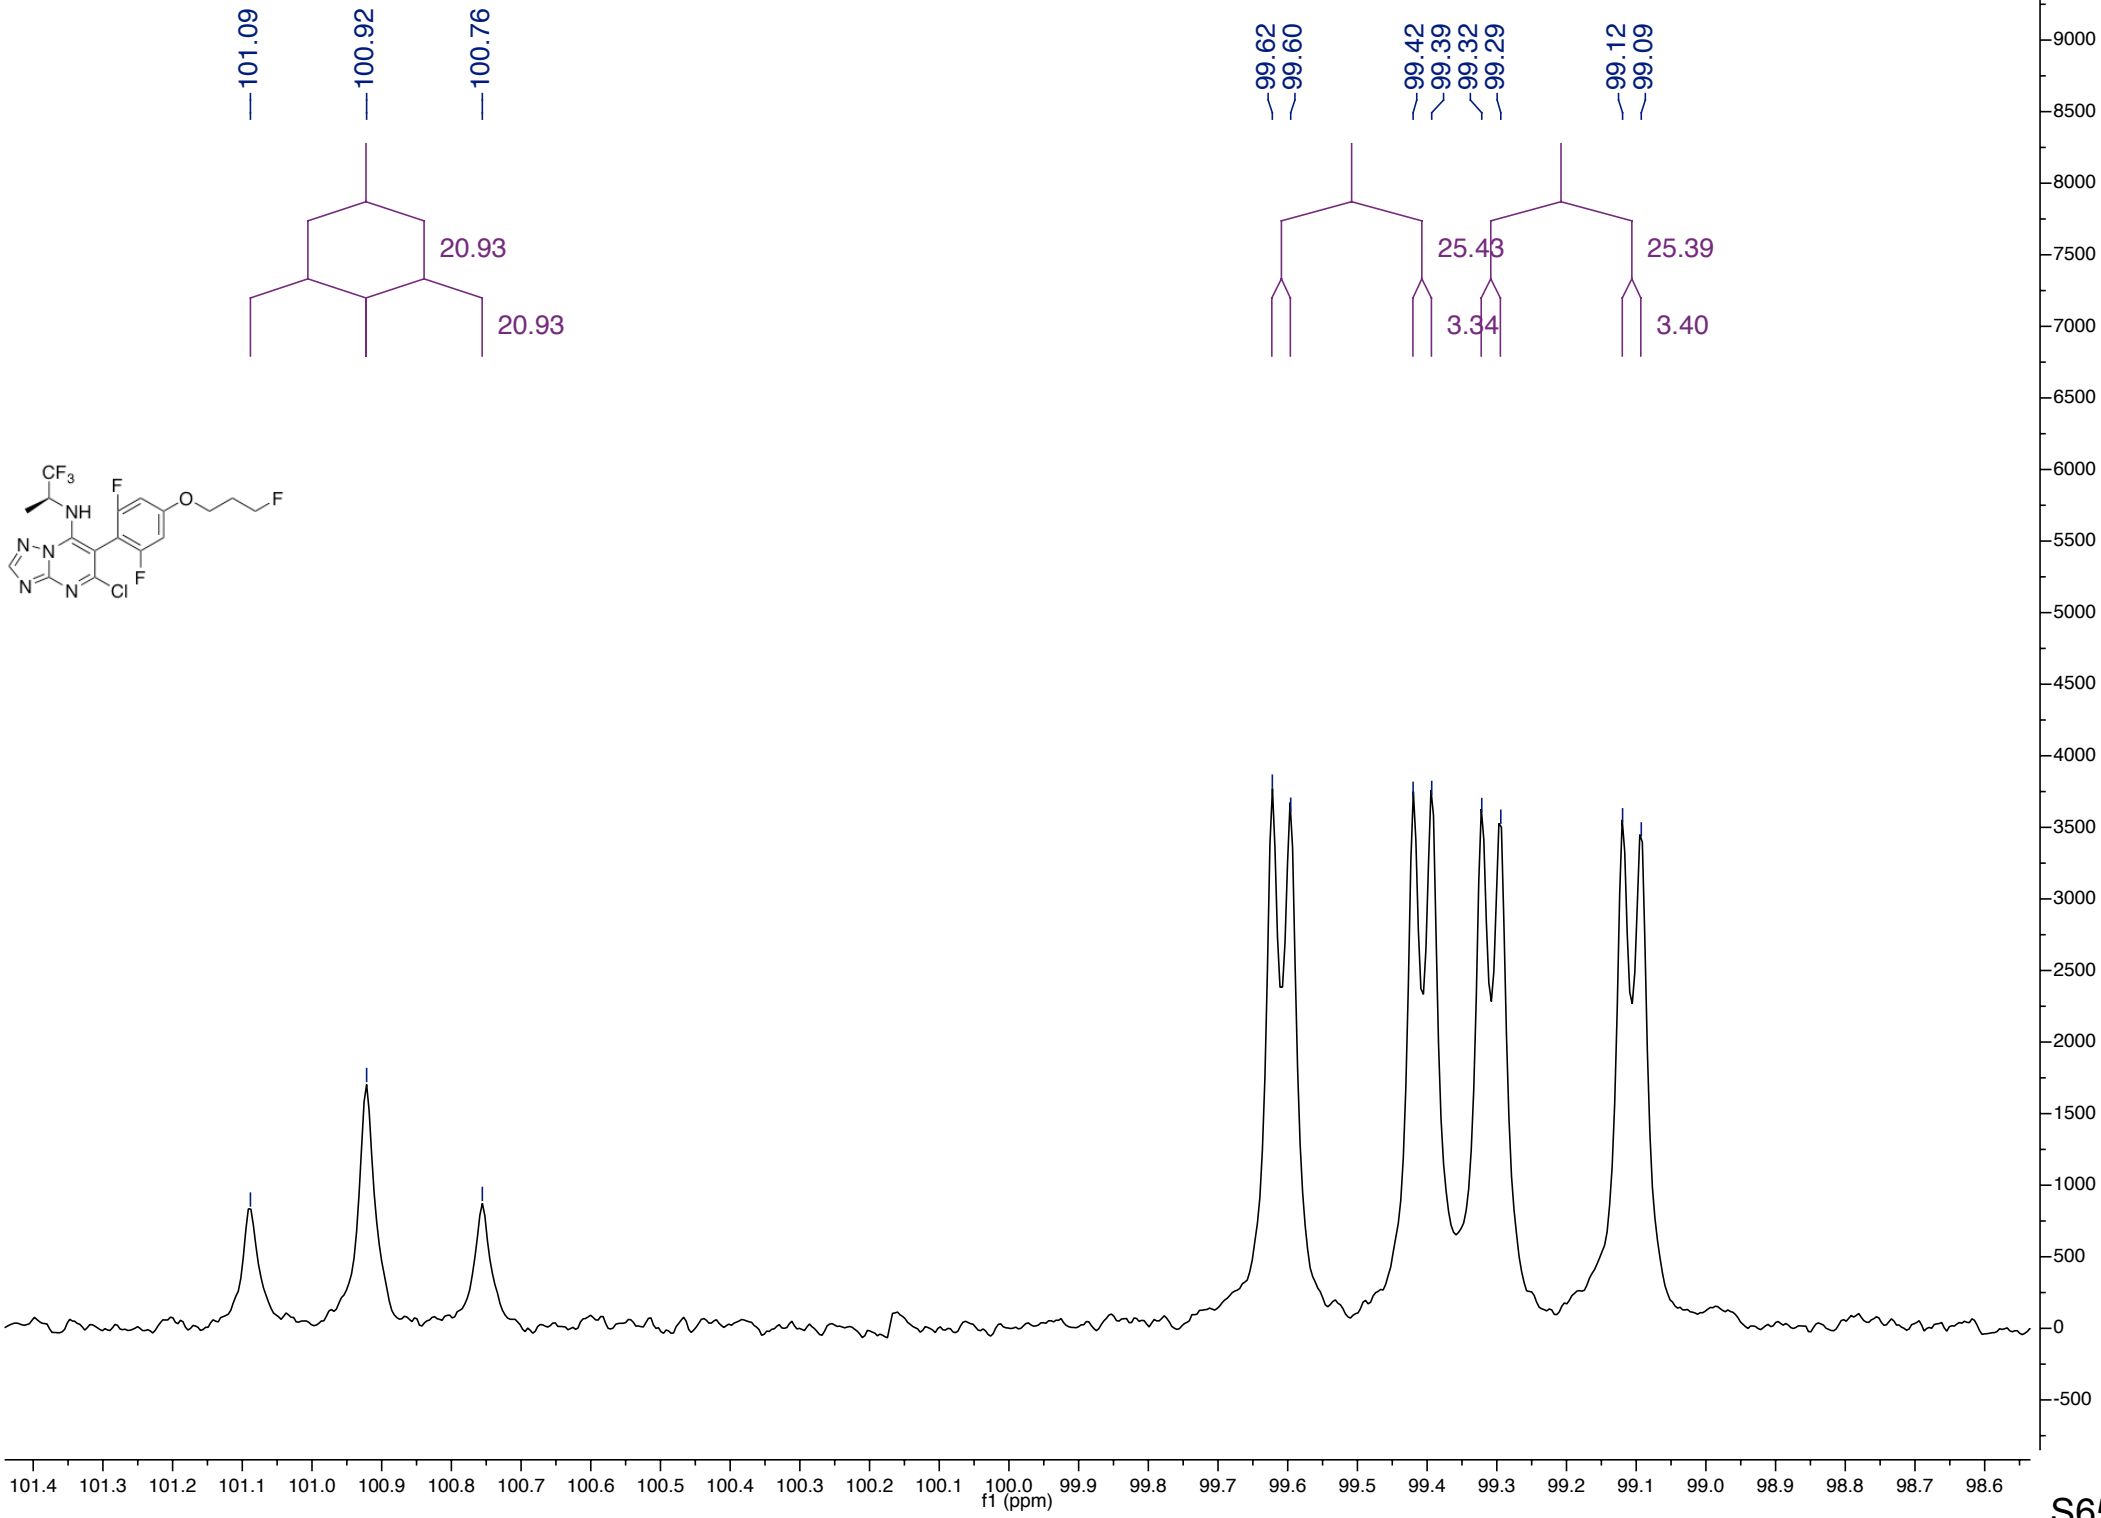

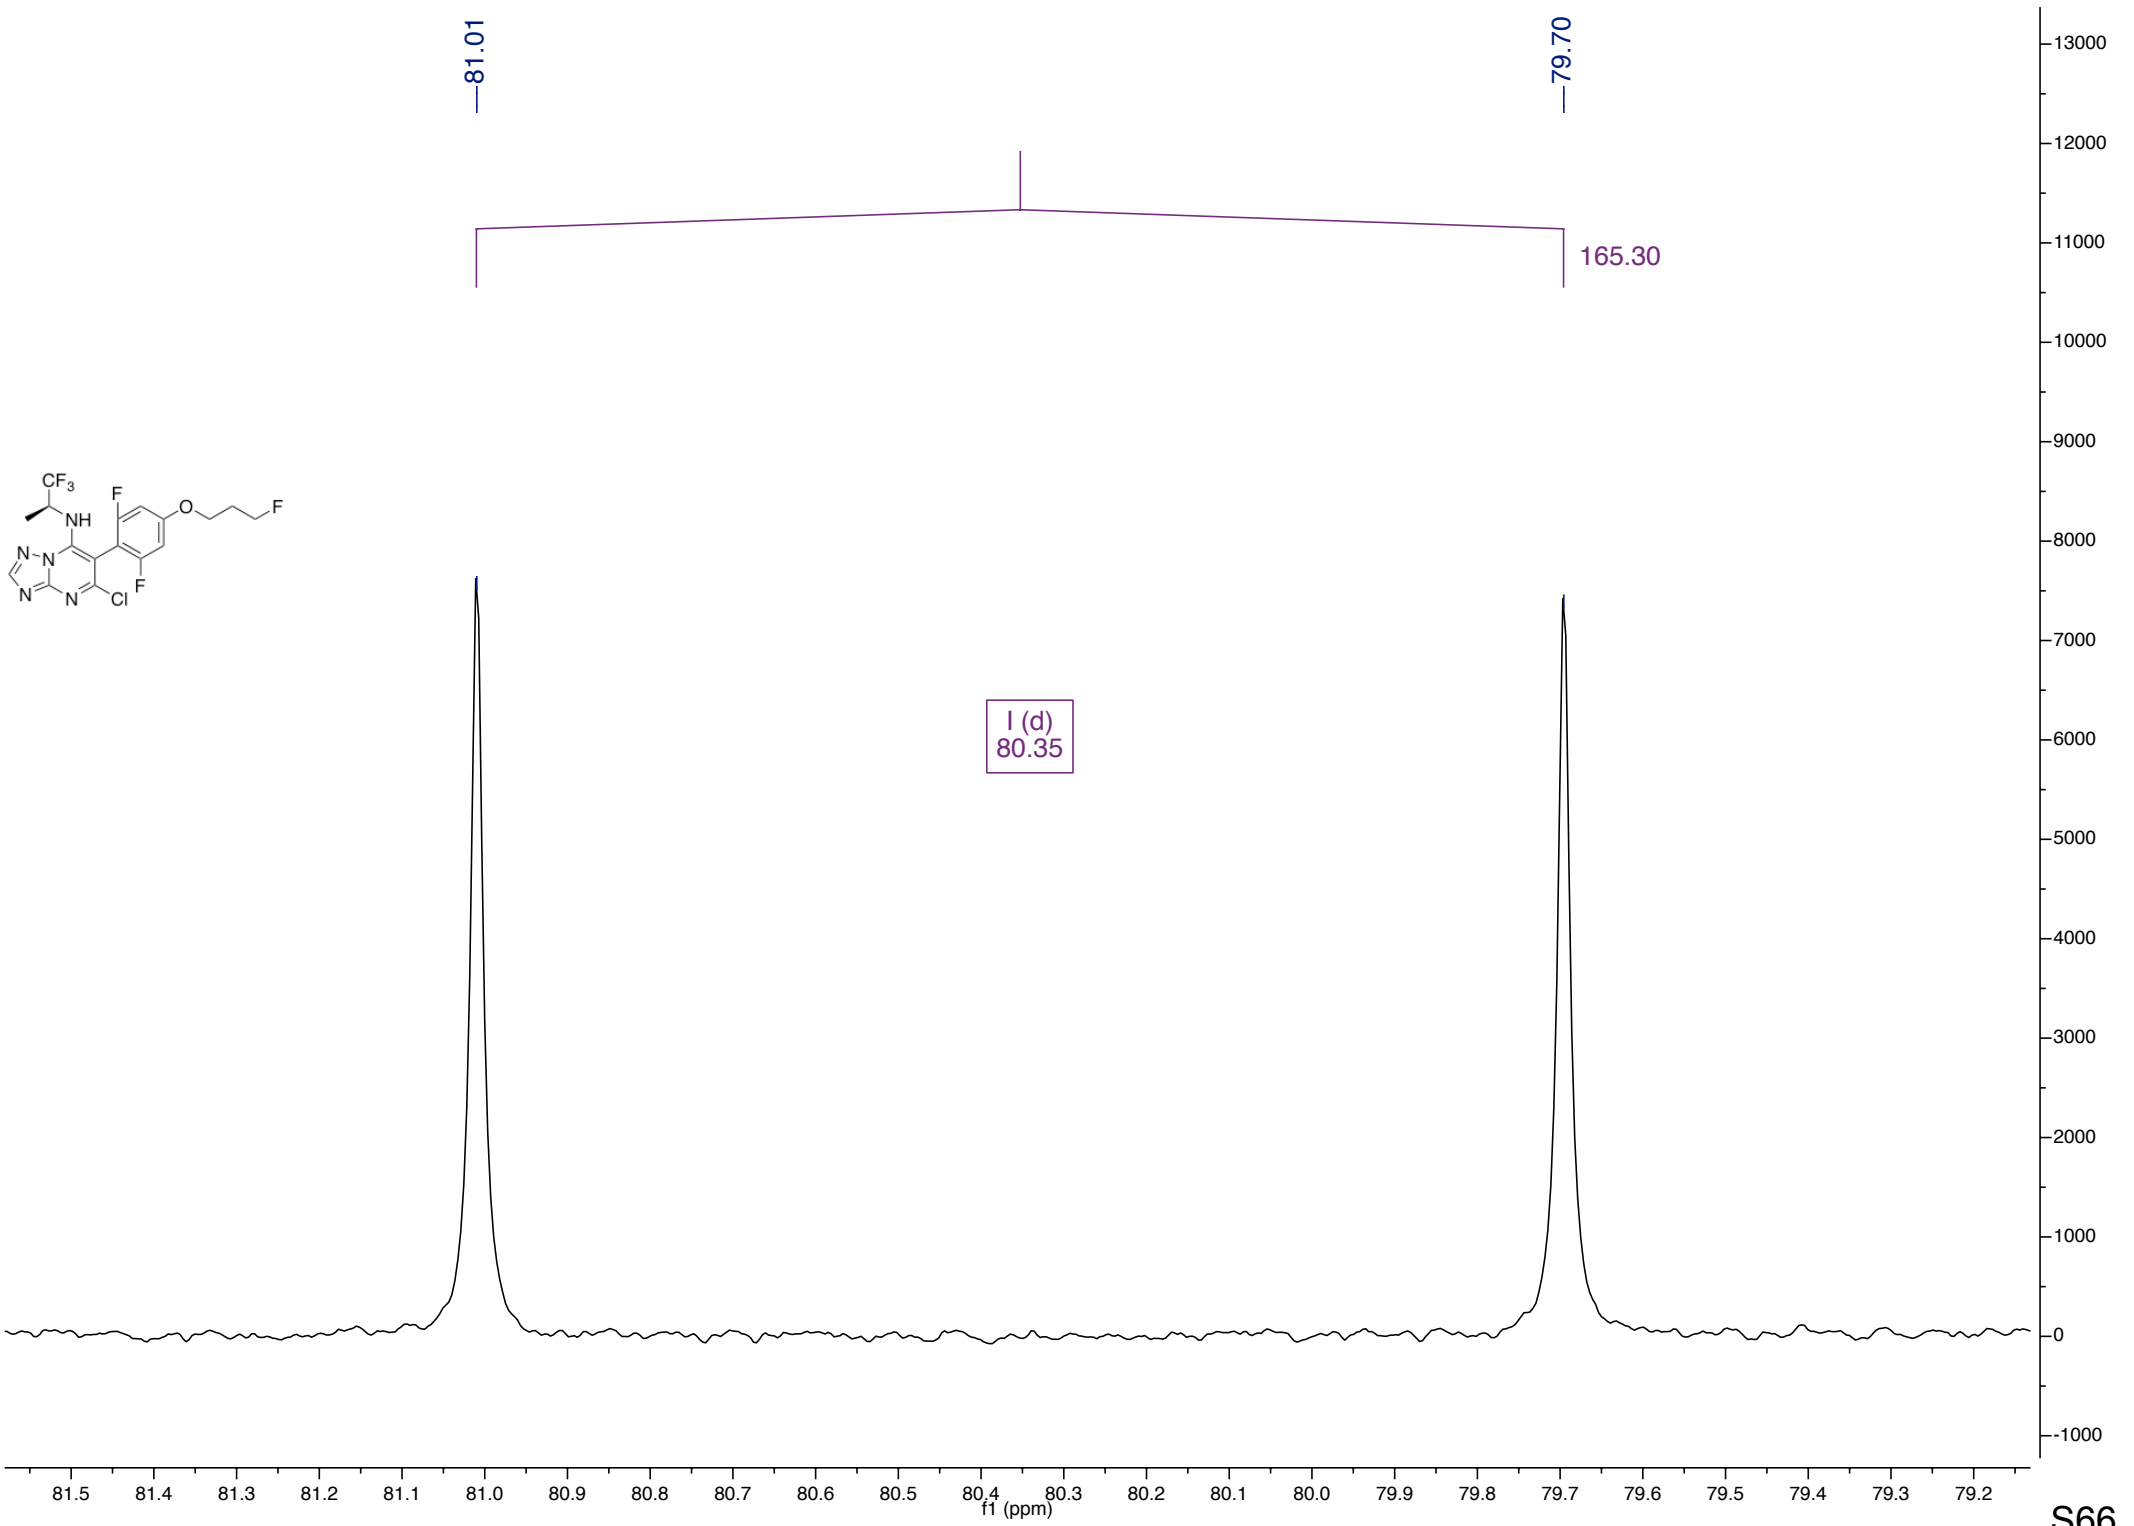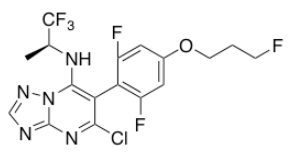

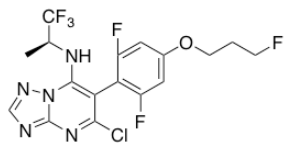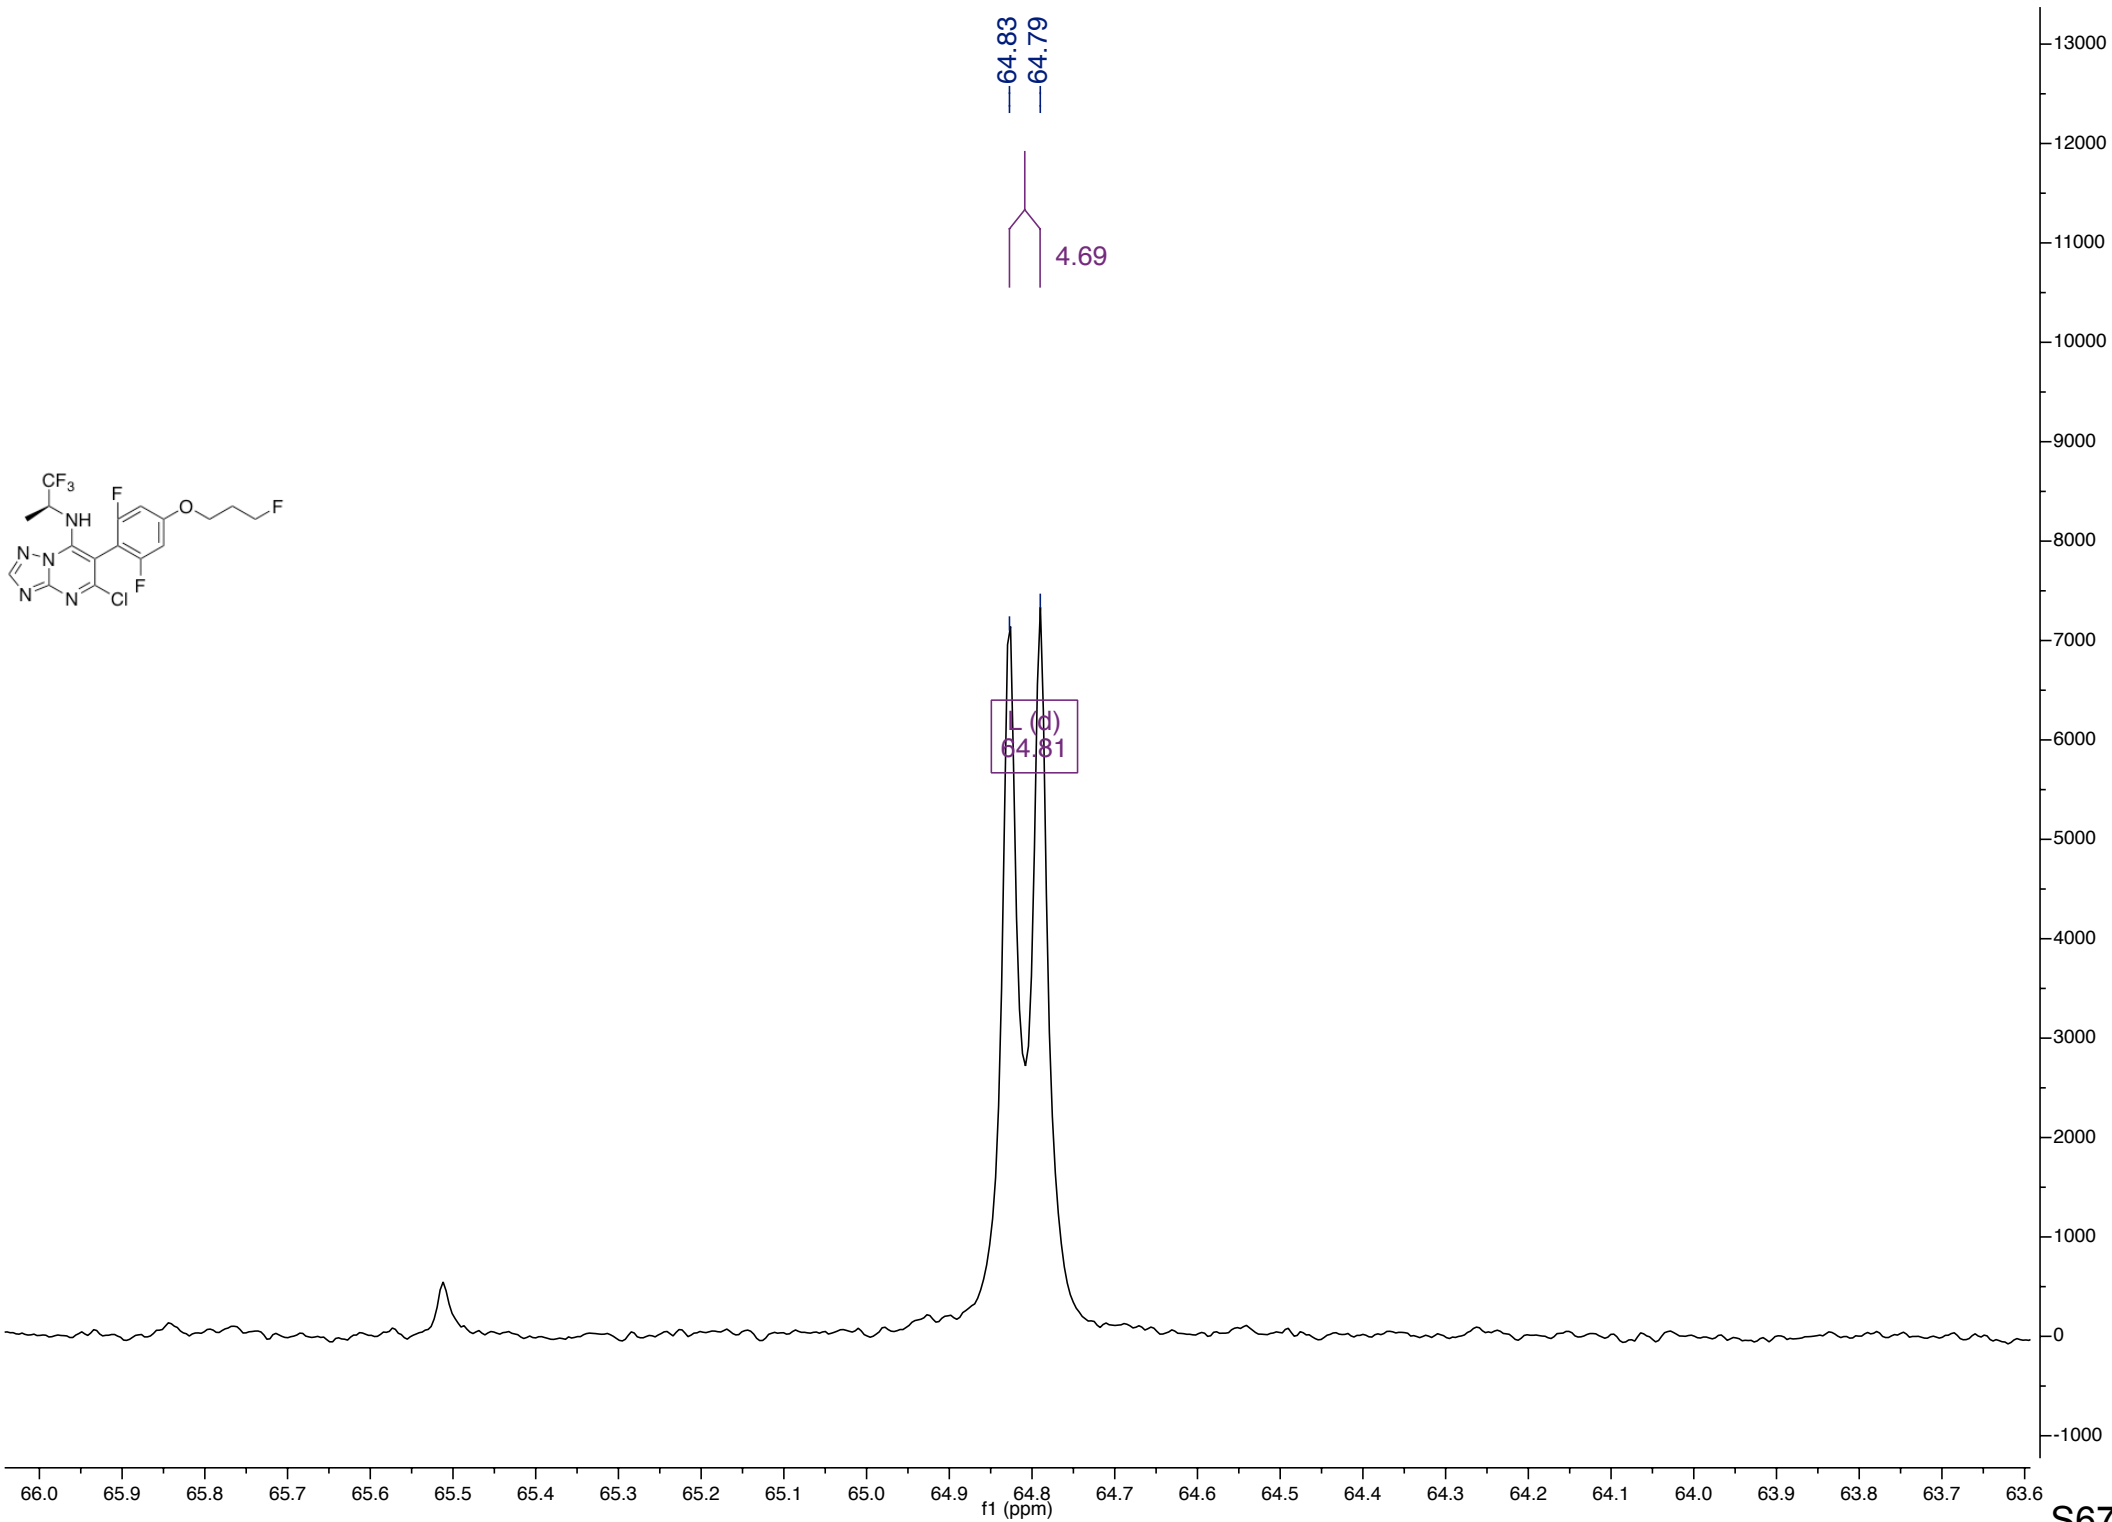

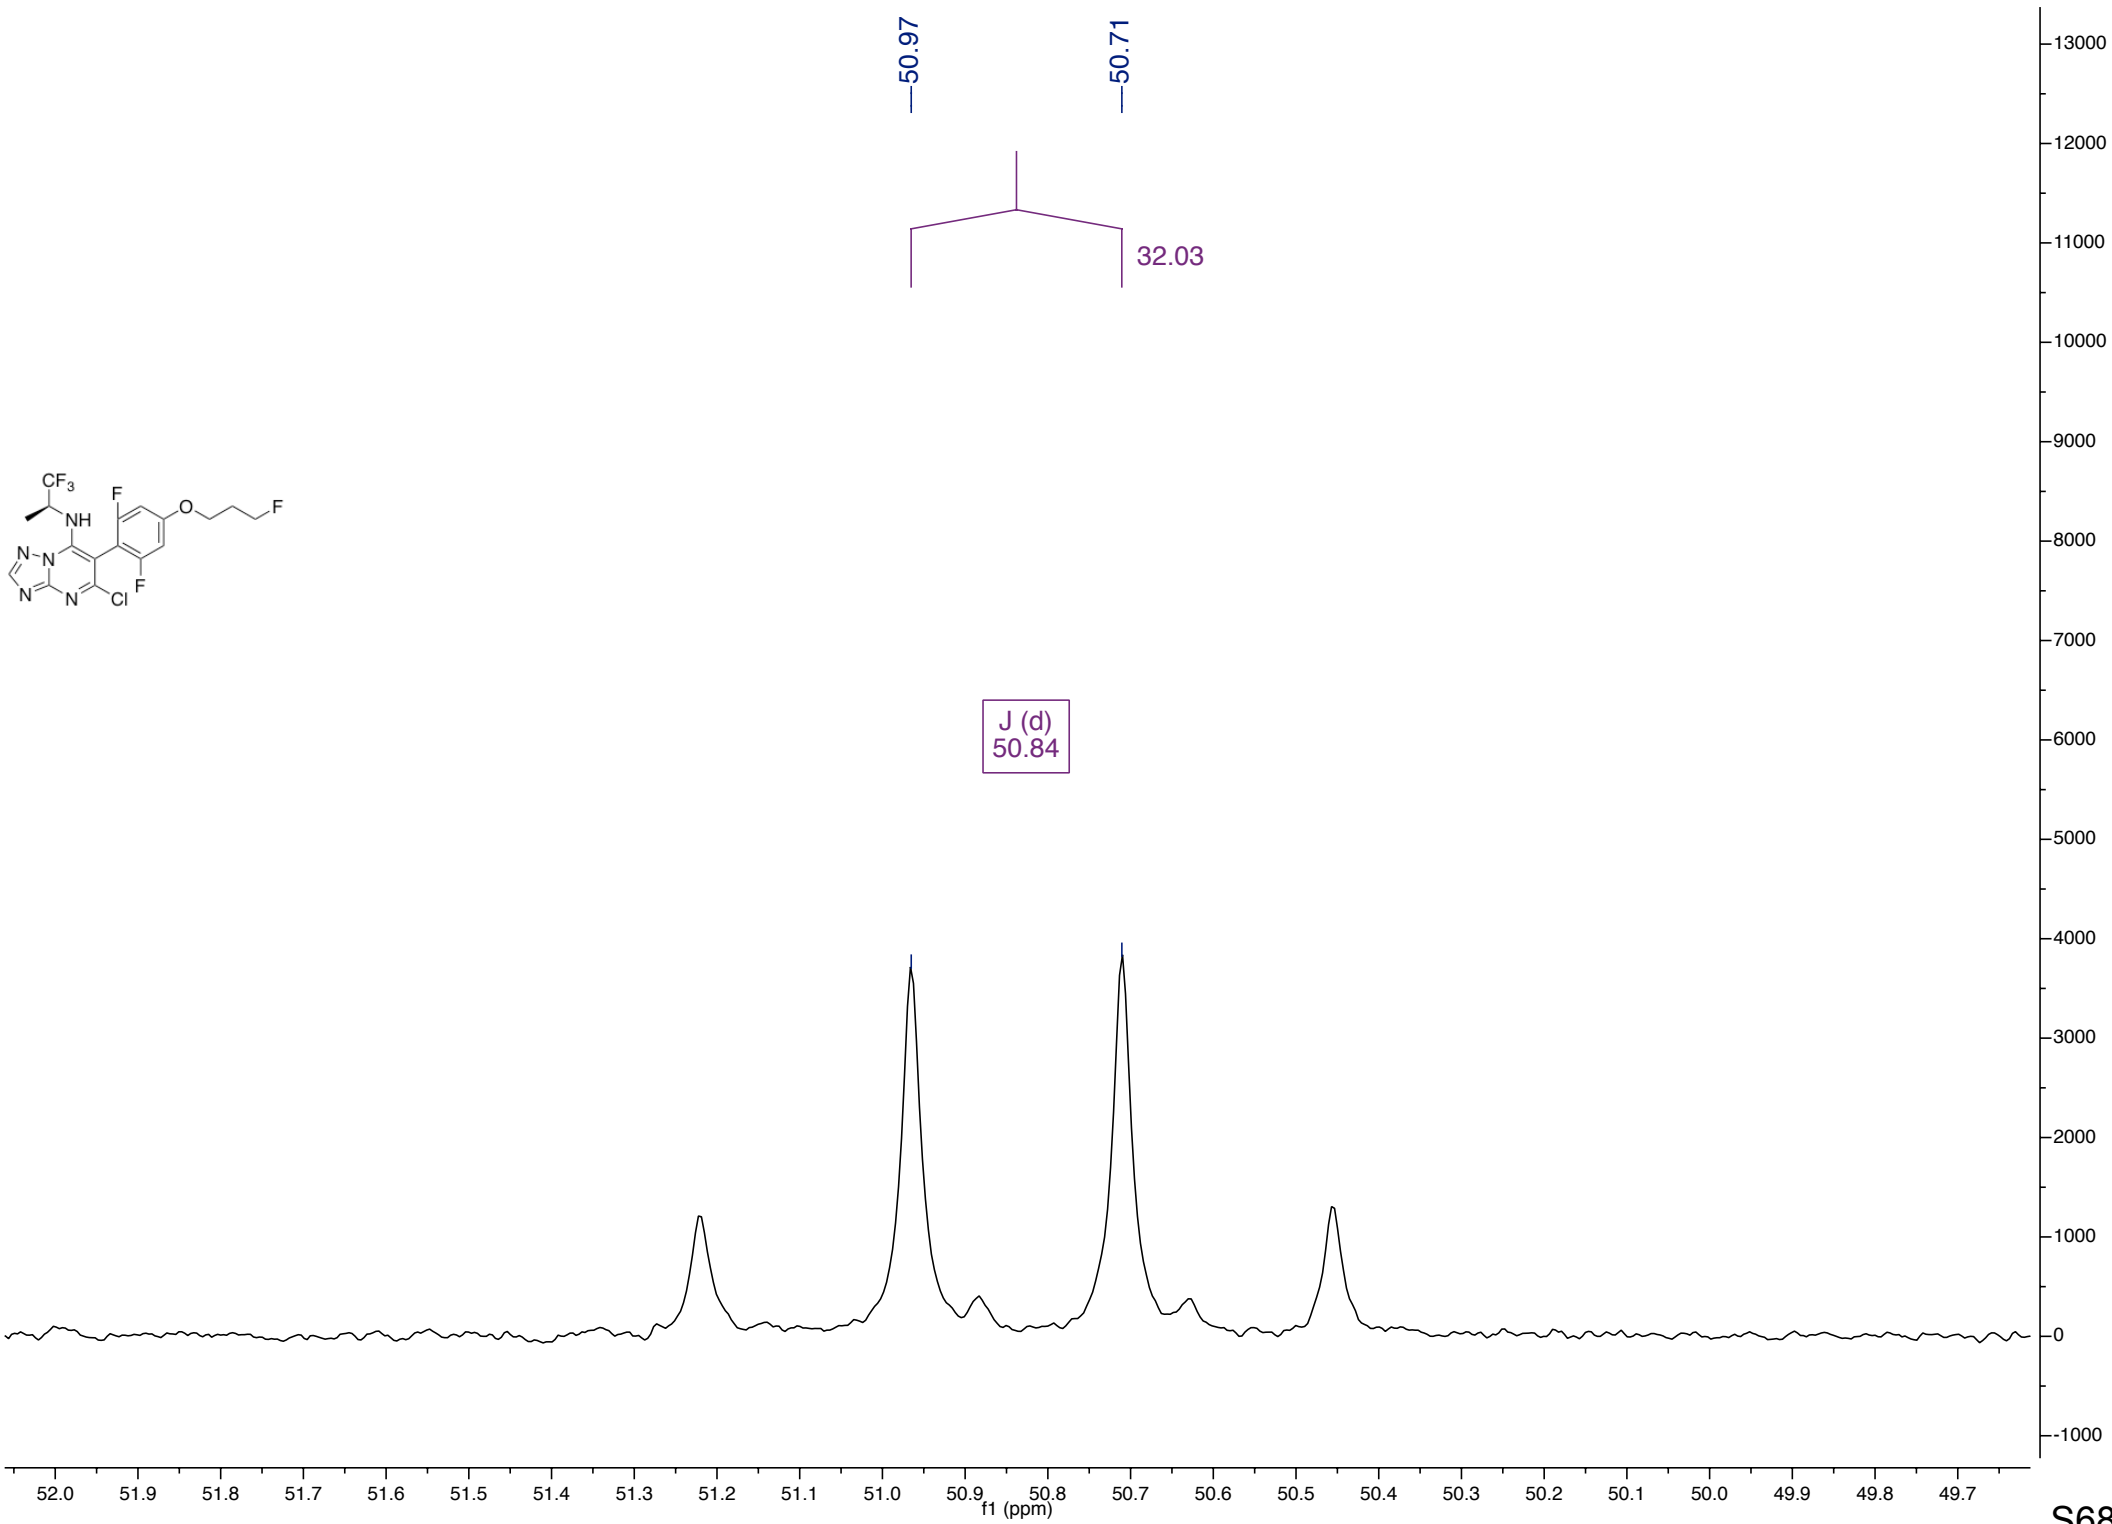

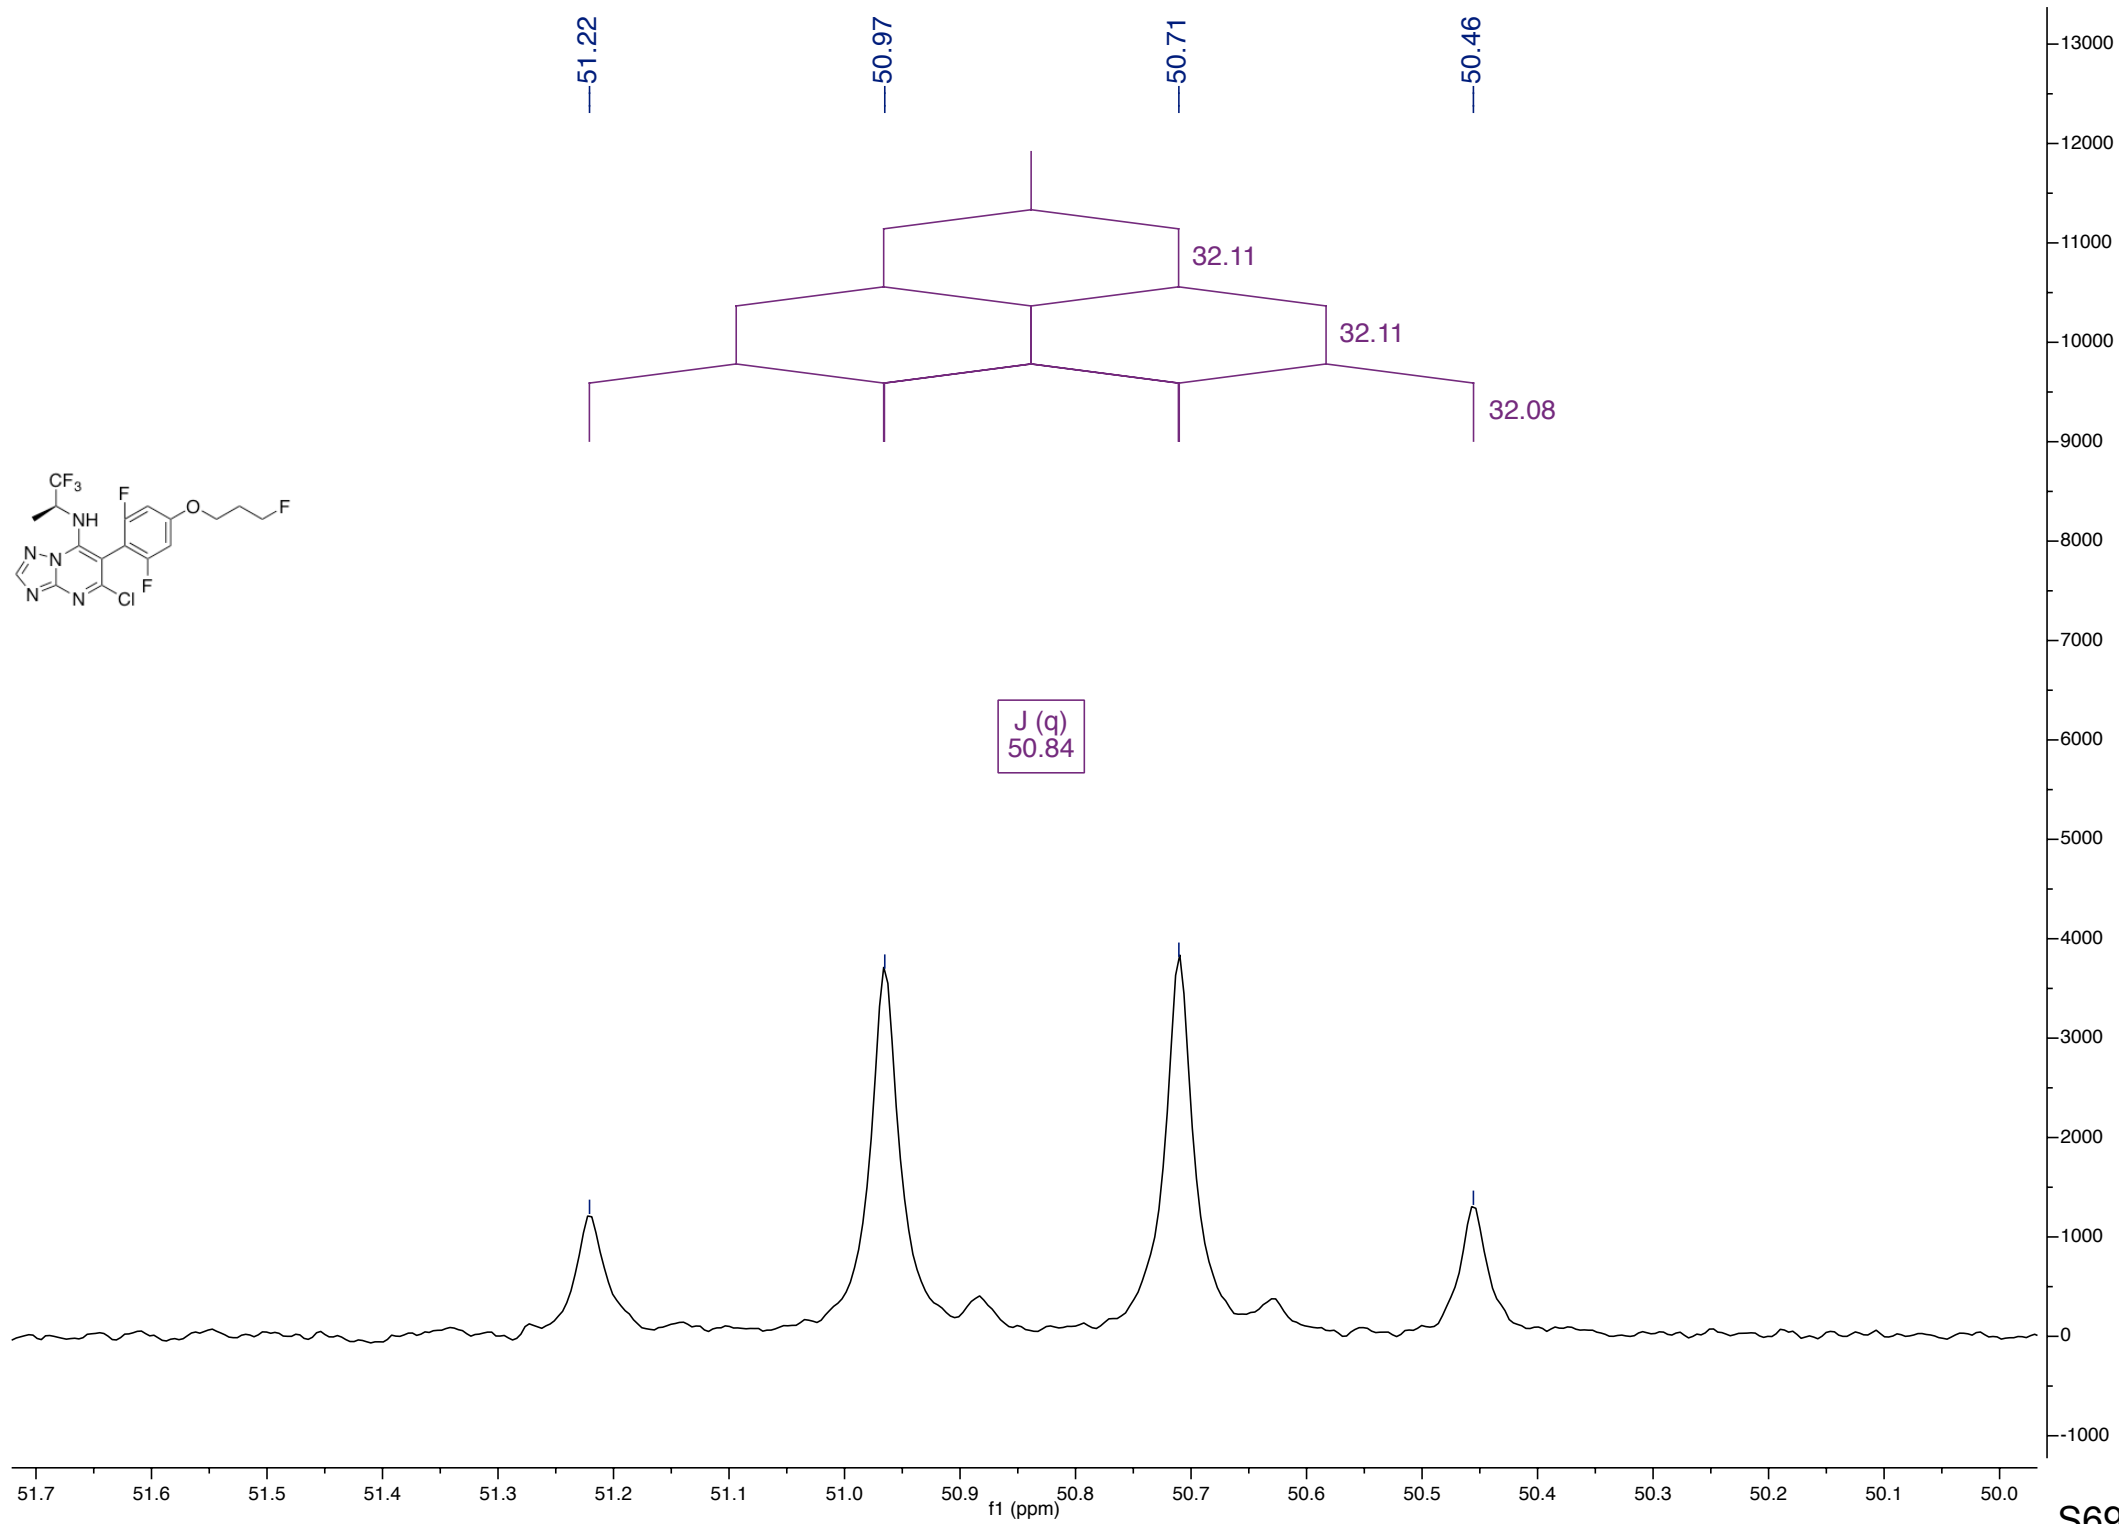

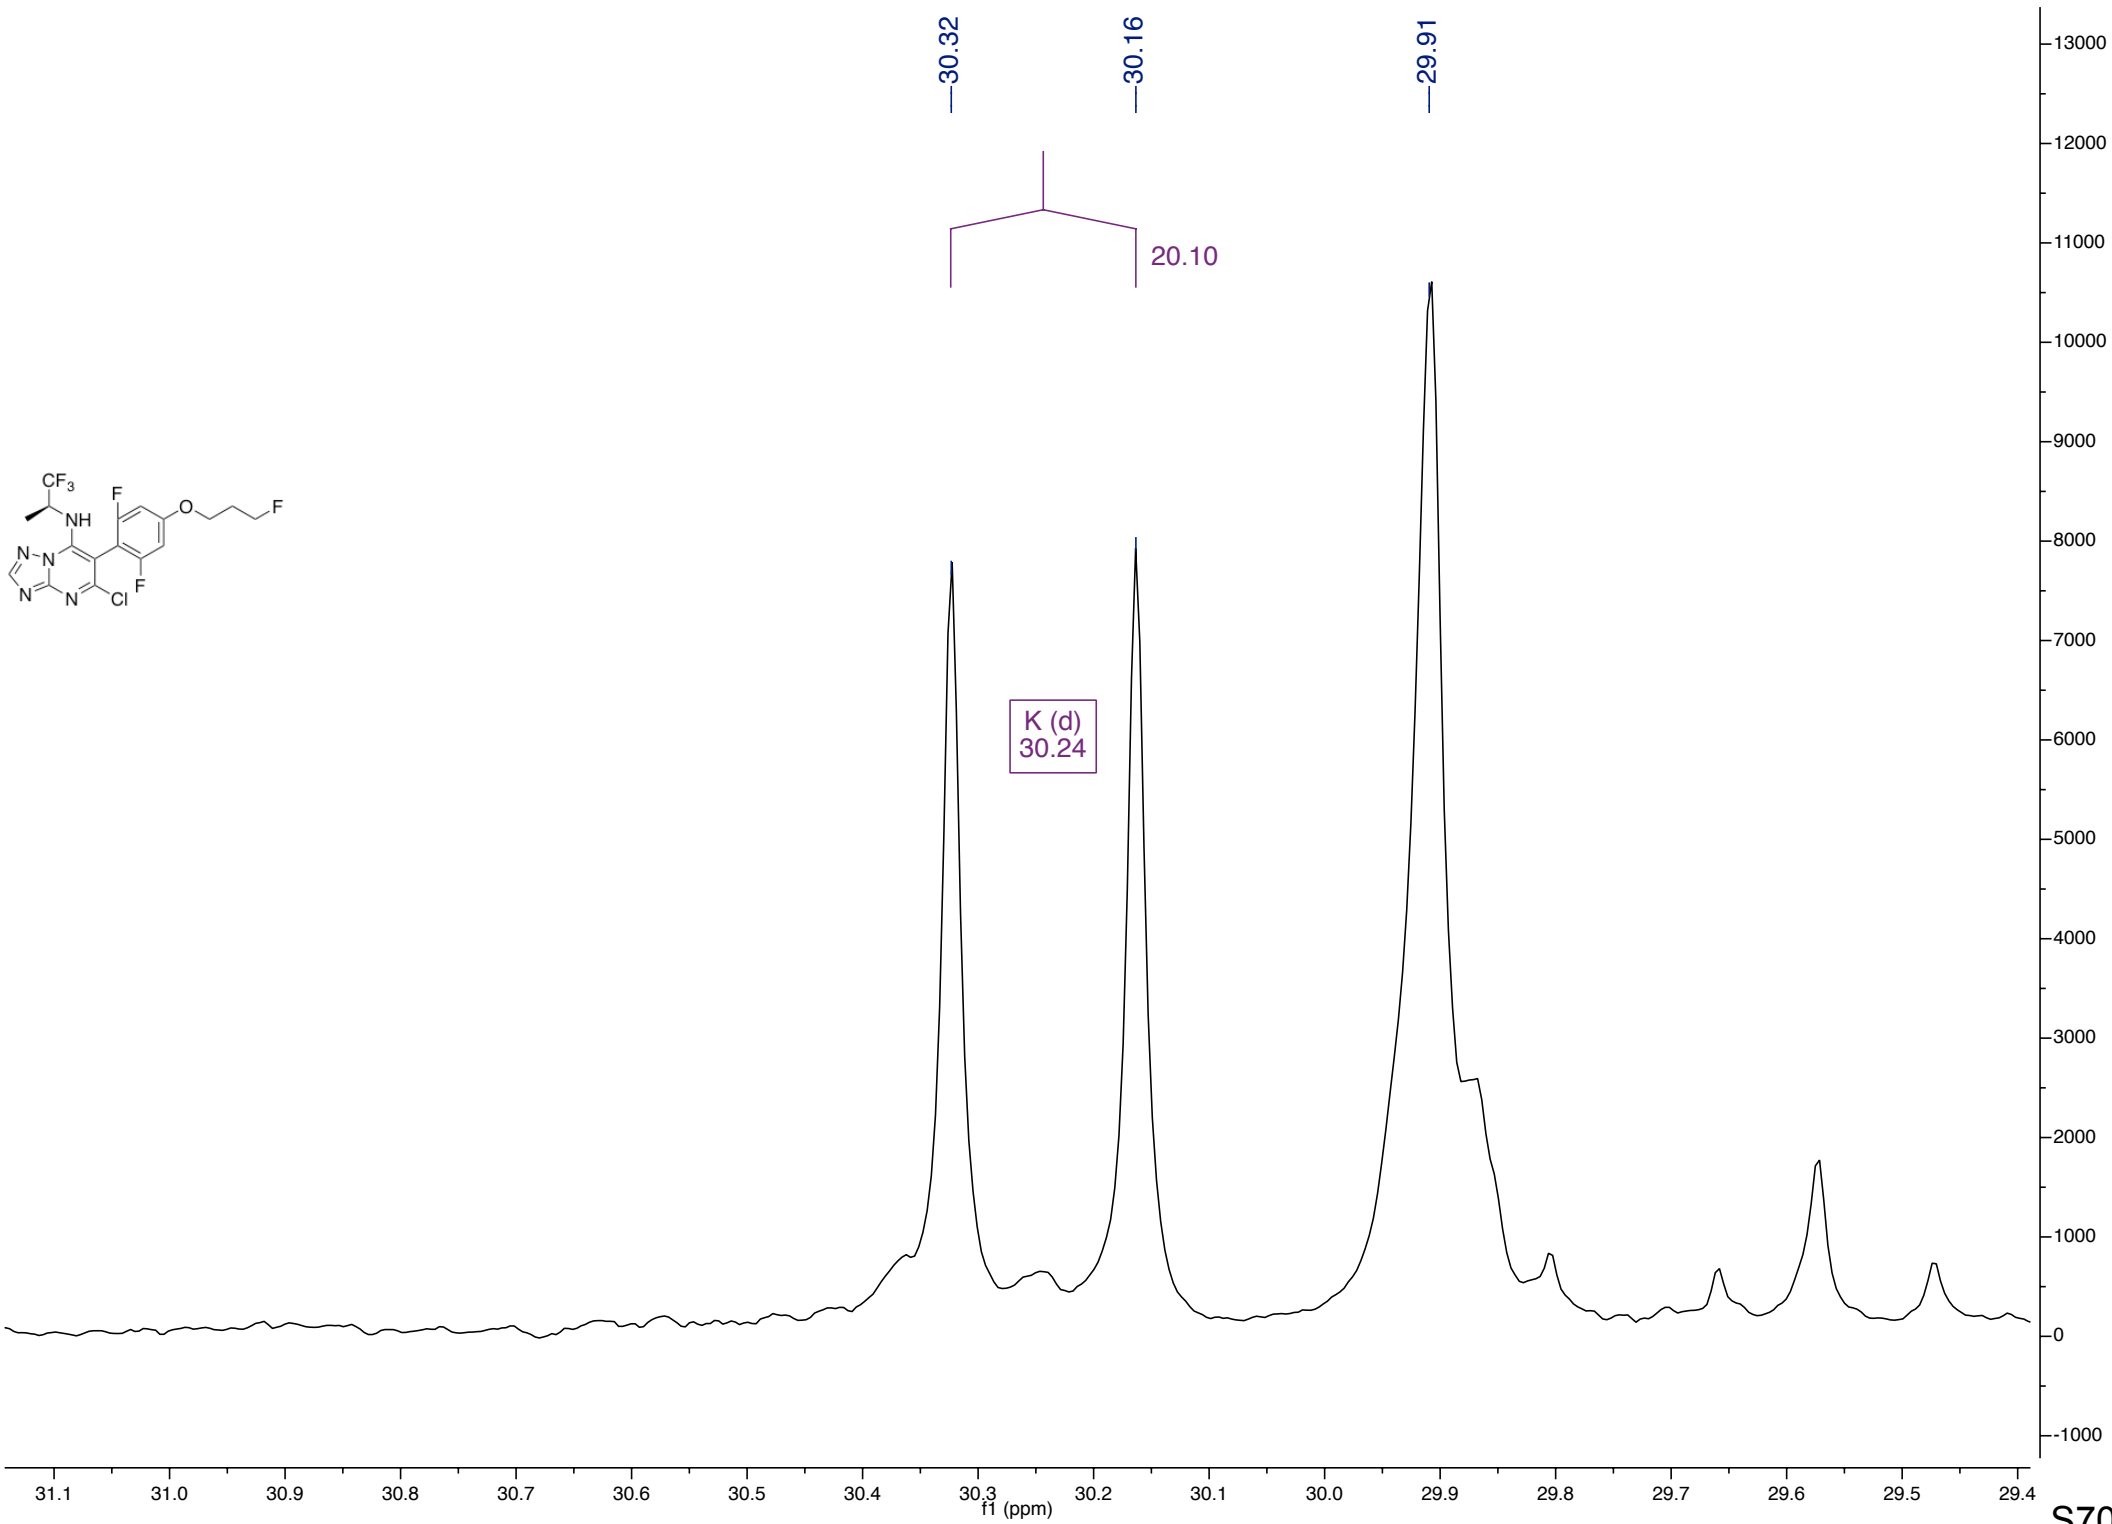



—15.41  
—15.40  
—15.38  
—15.37

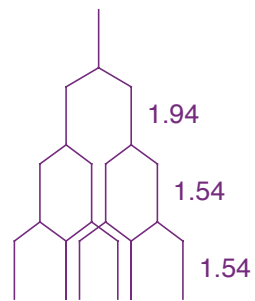

A (q)  
15.39

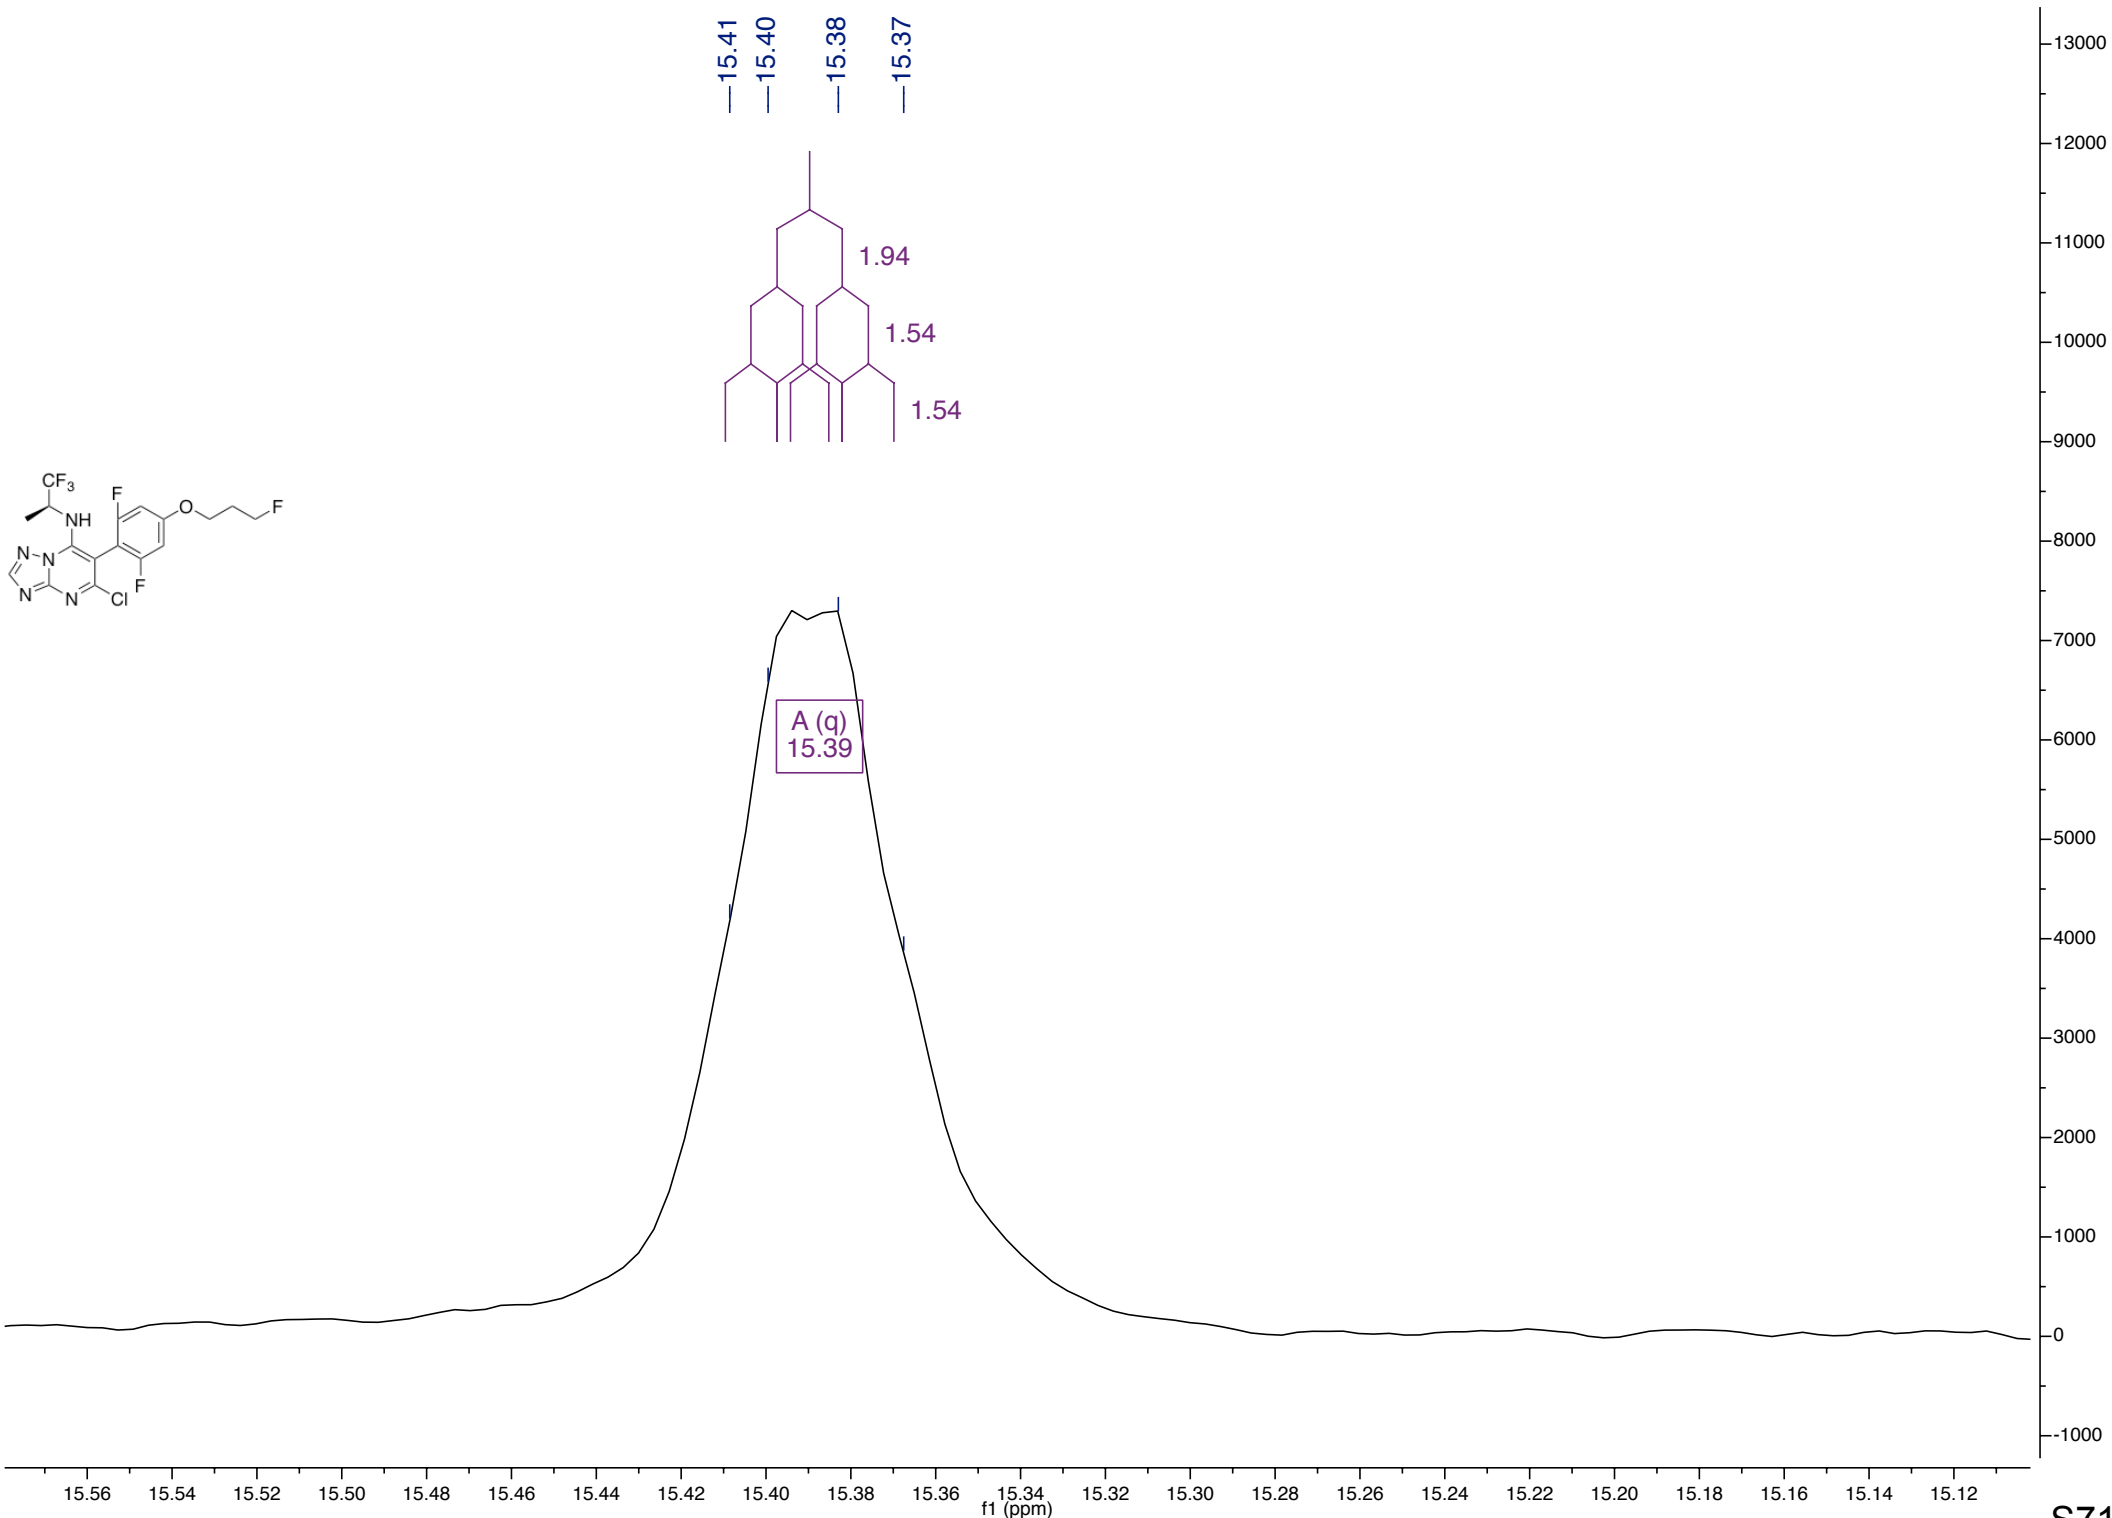

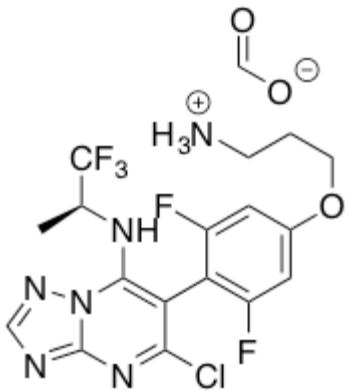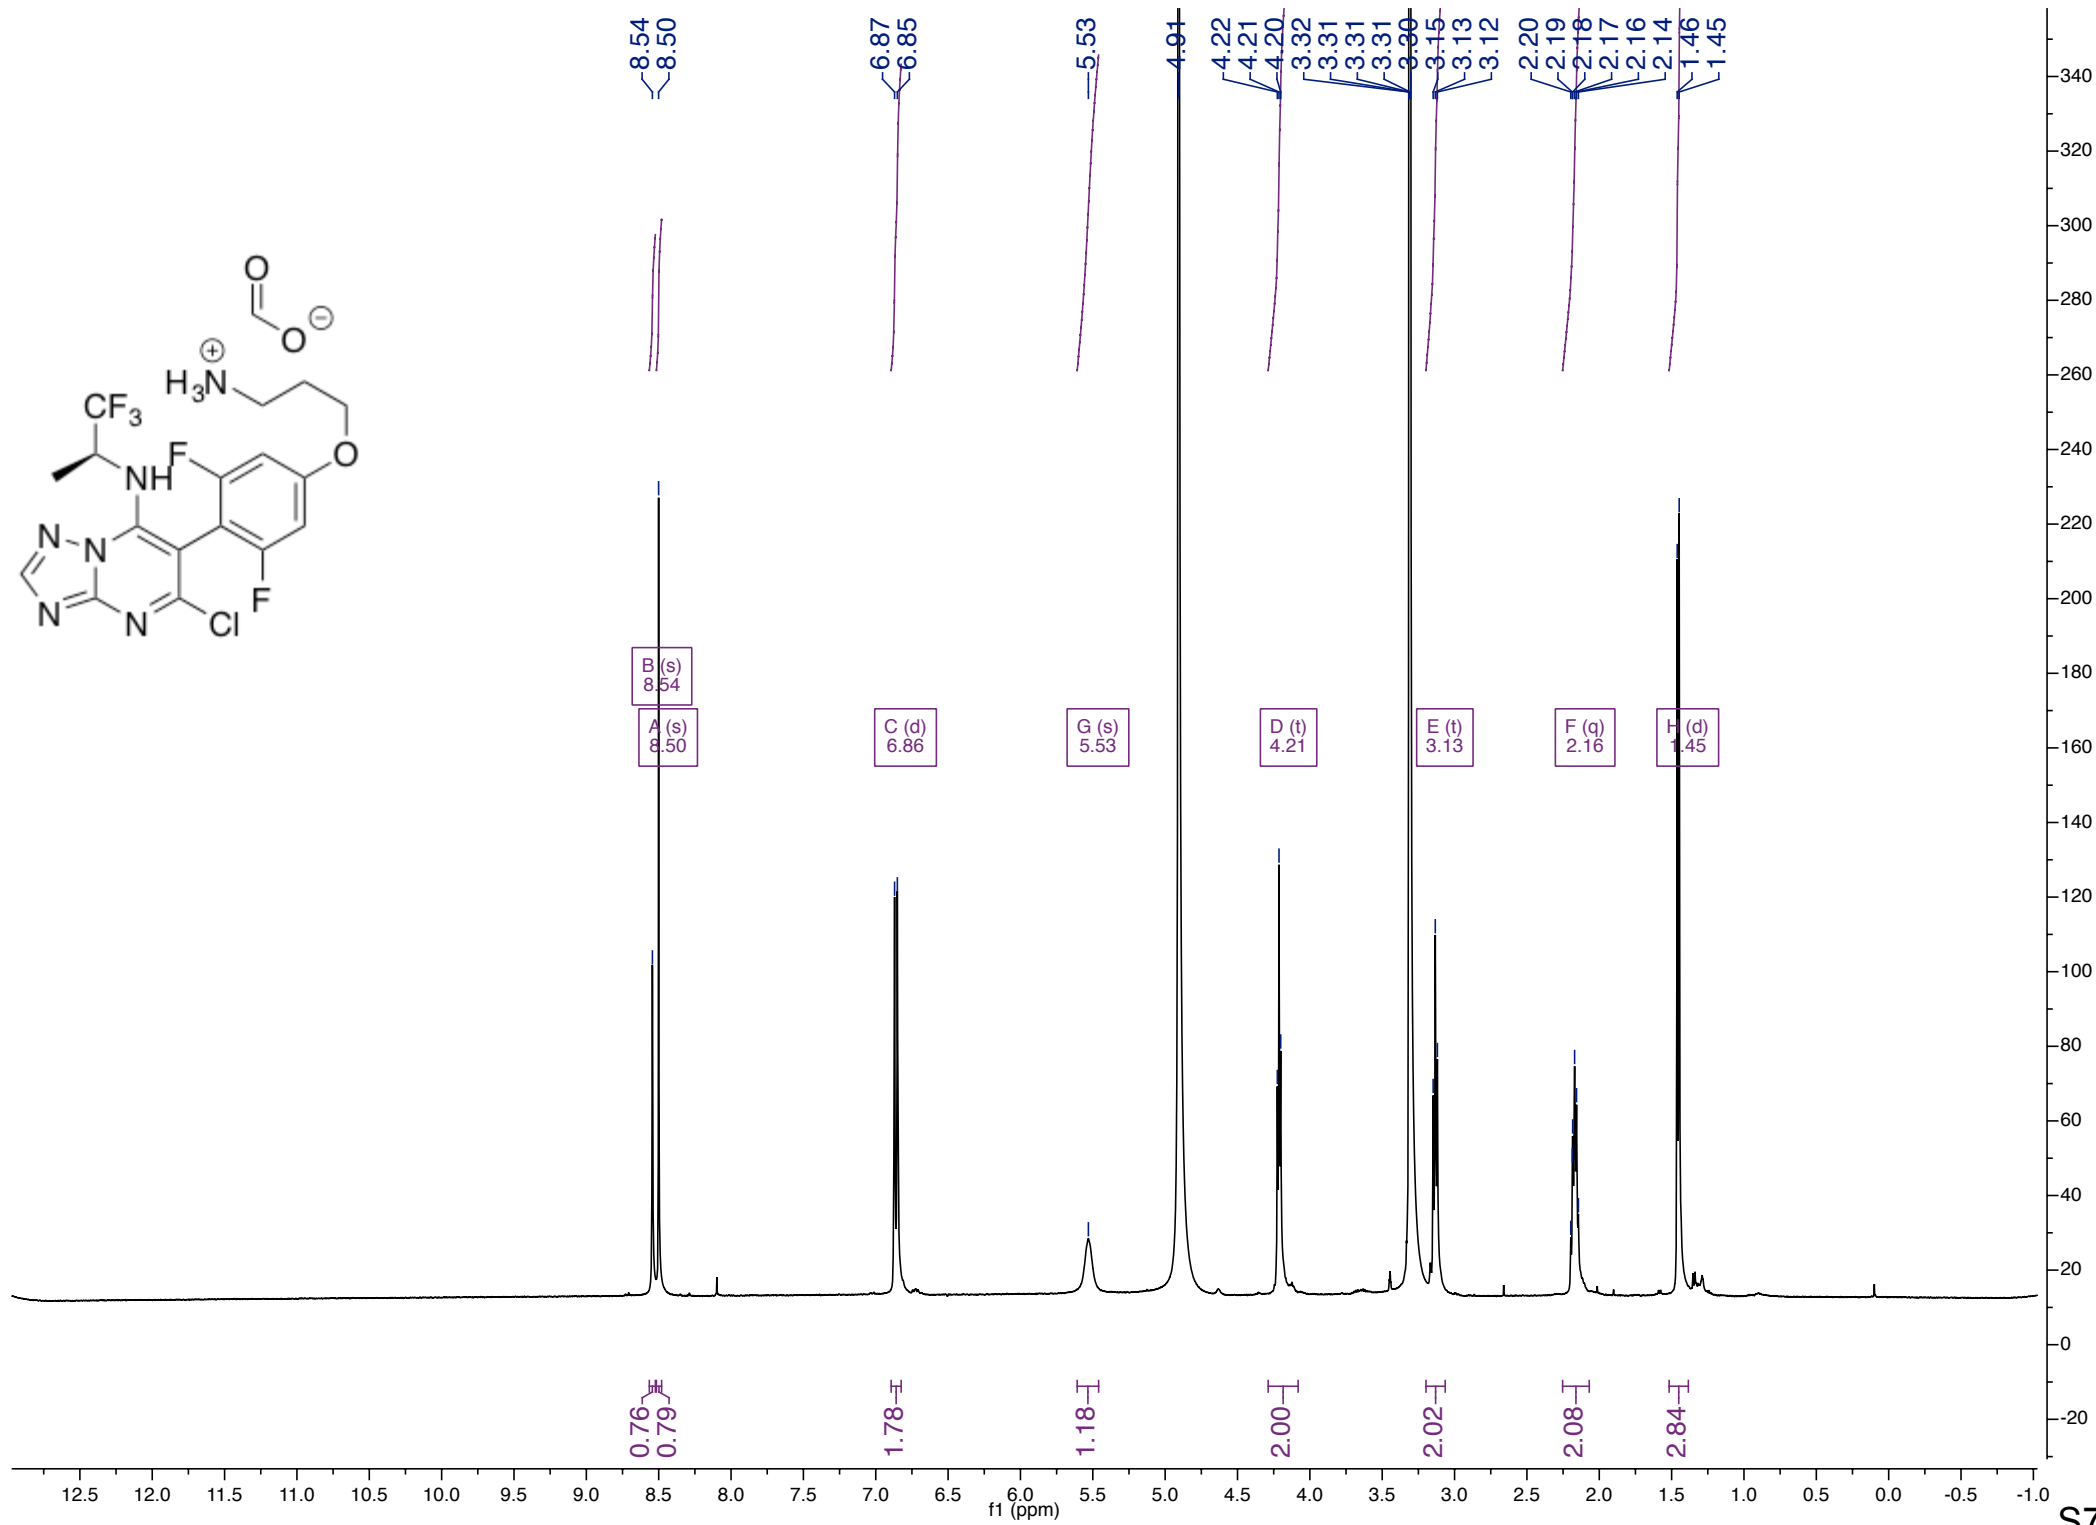



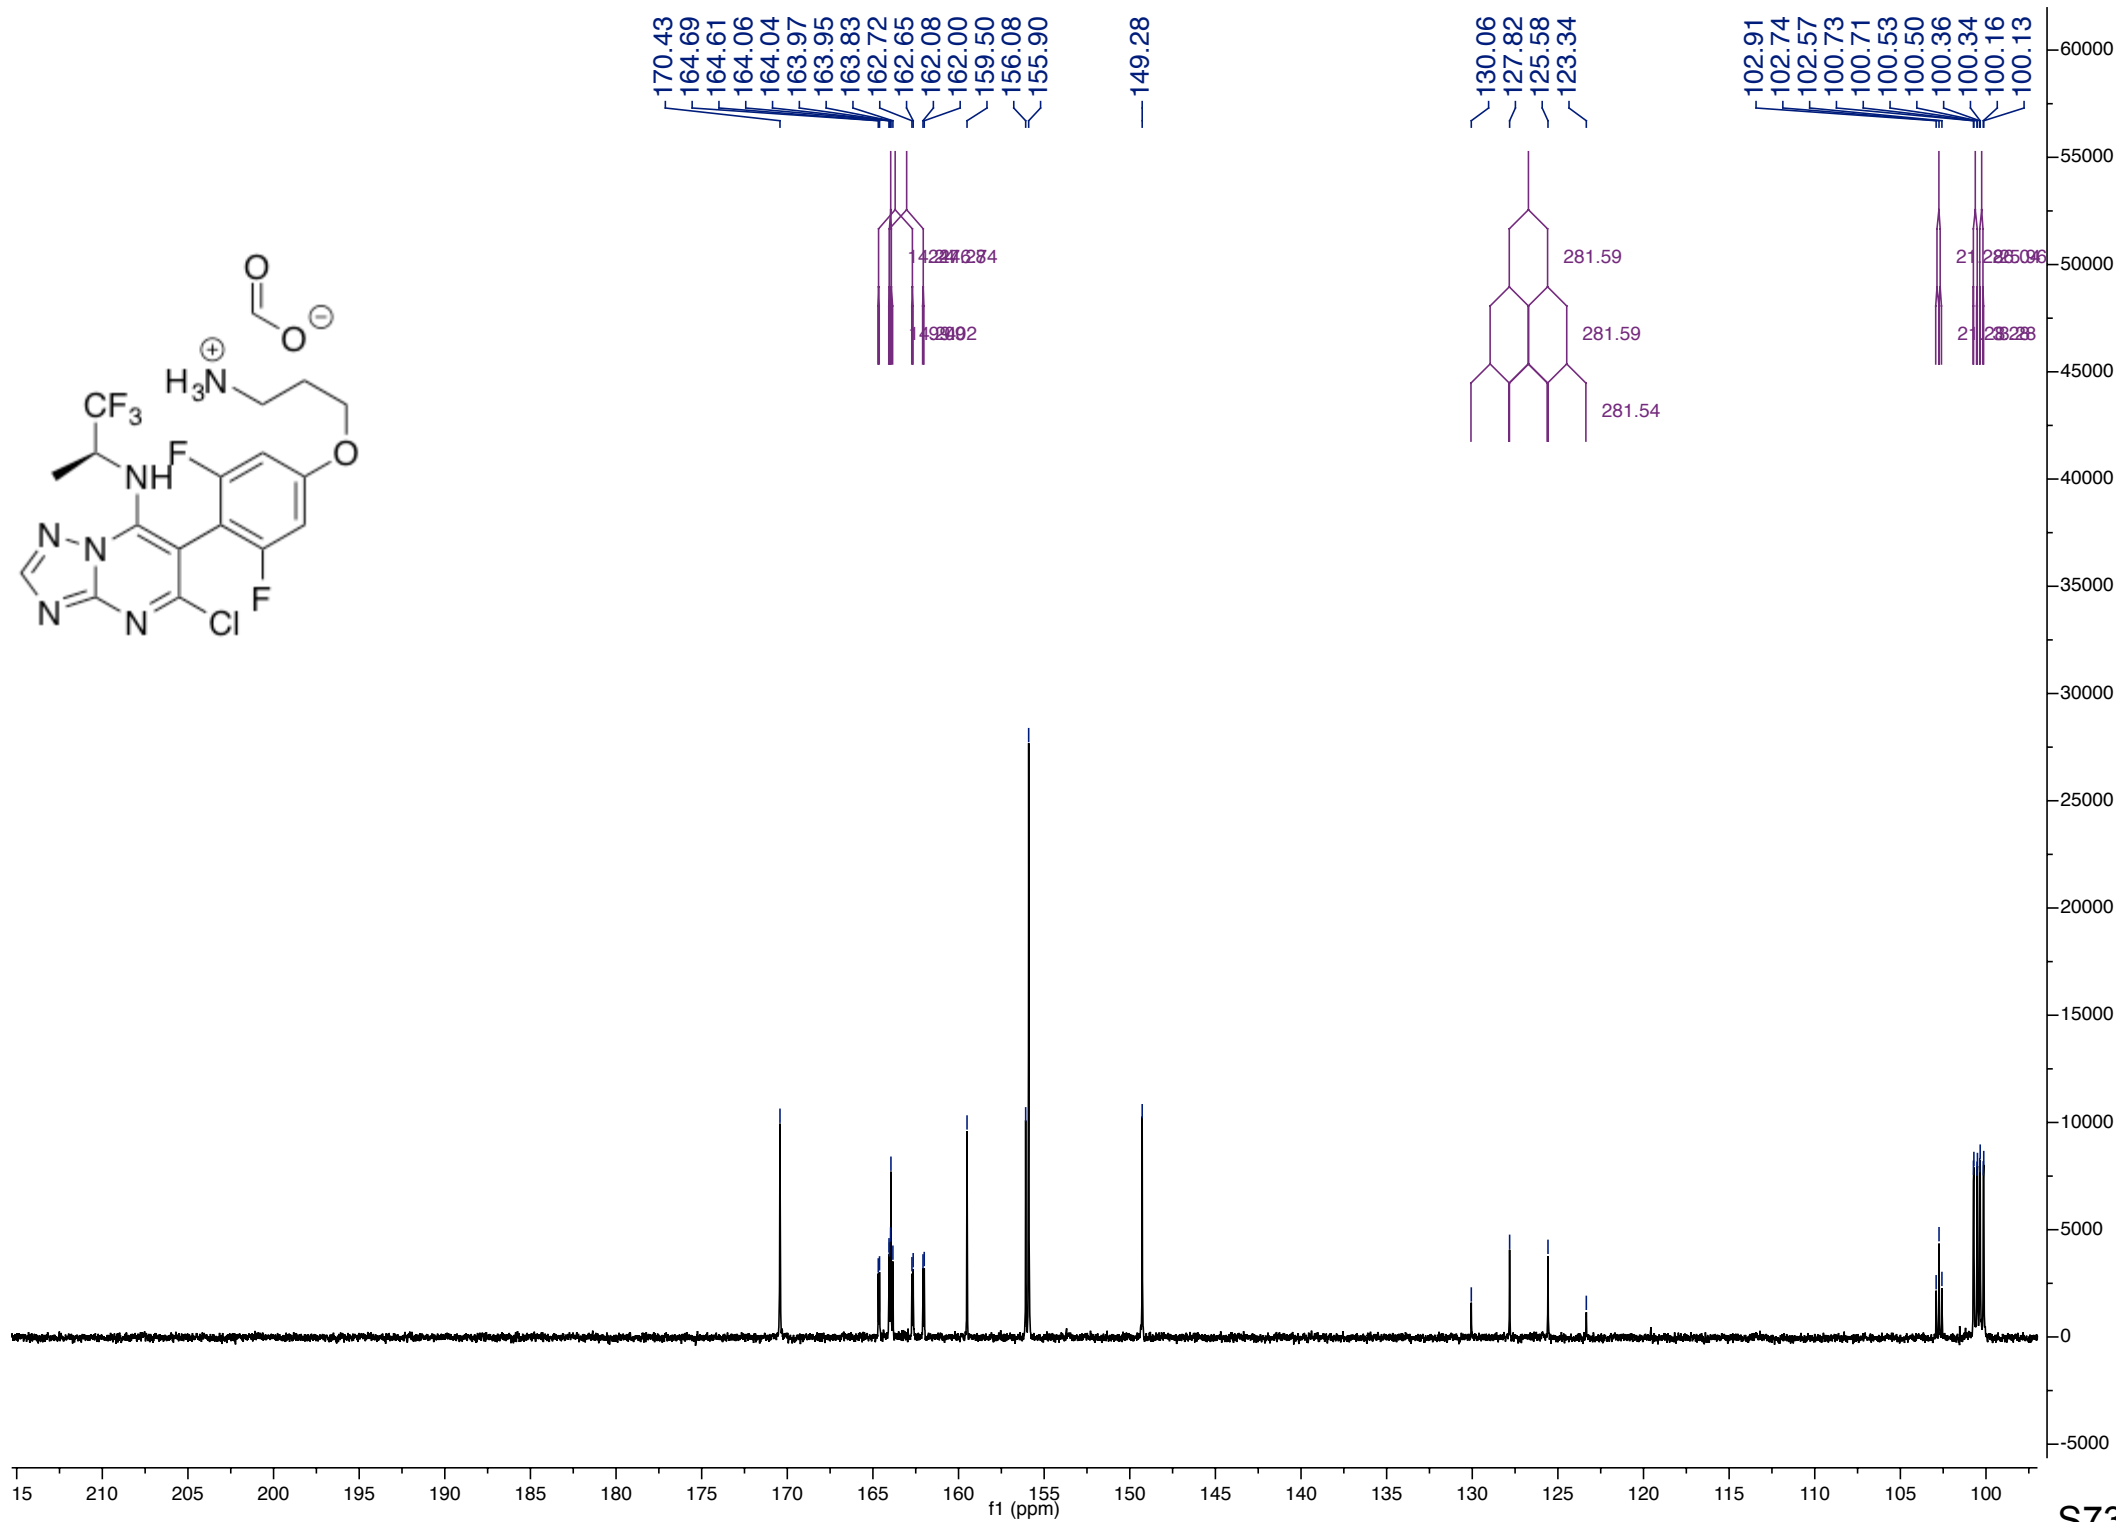

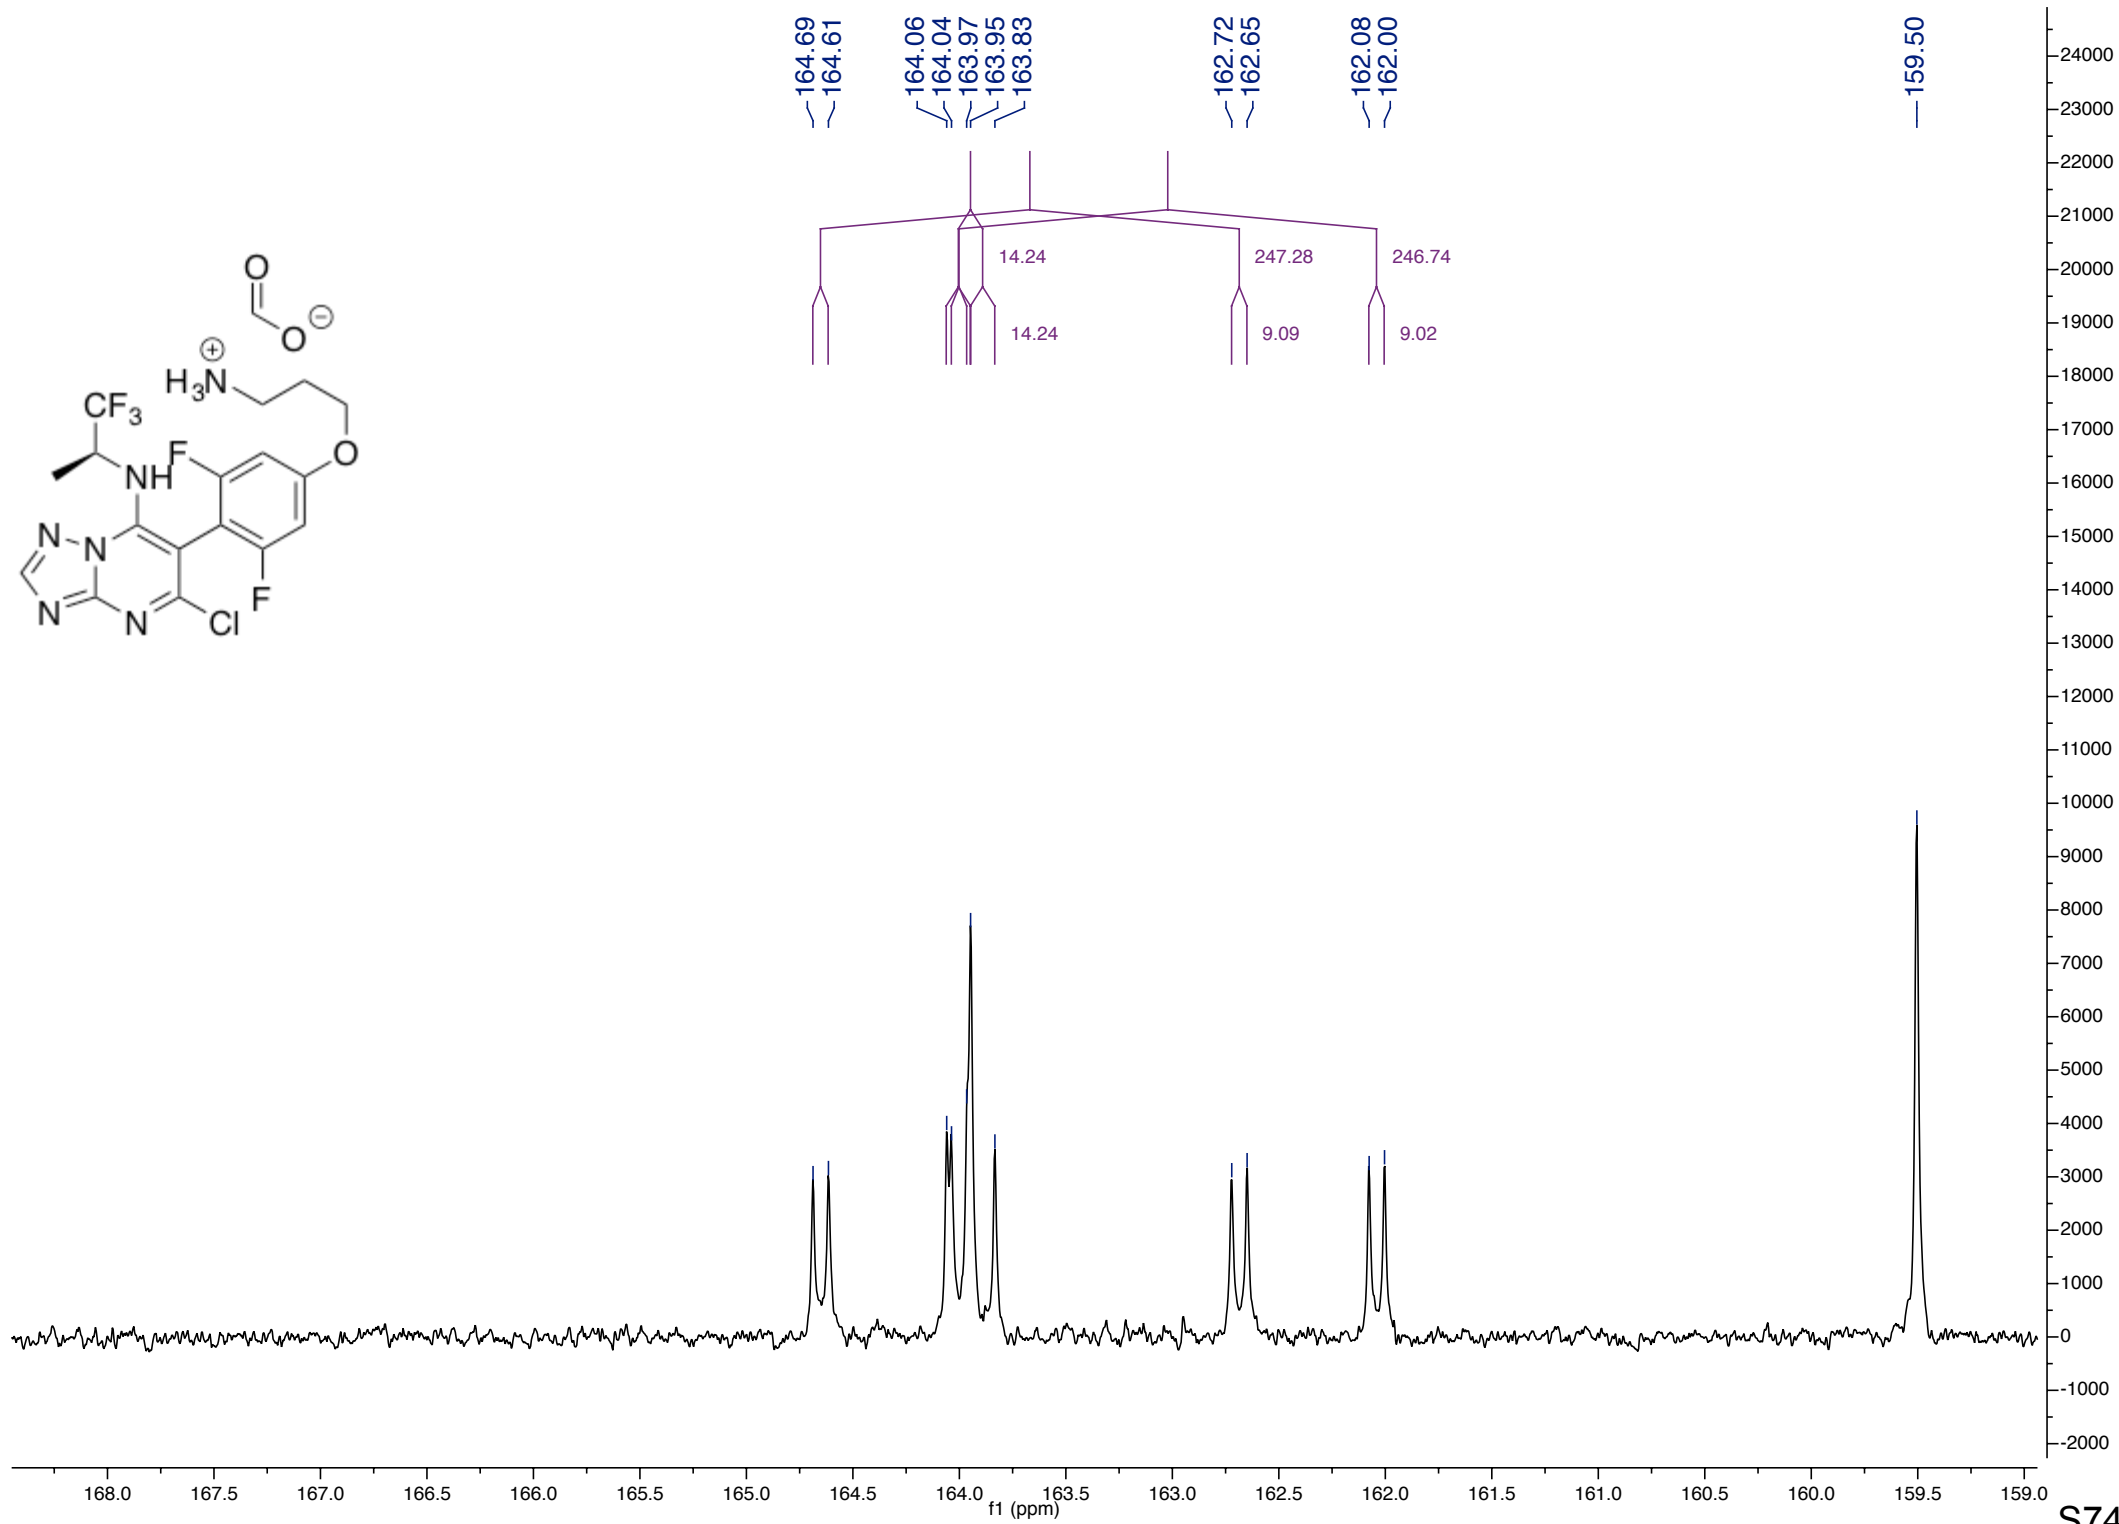

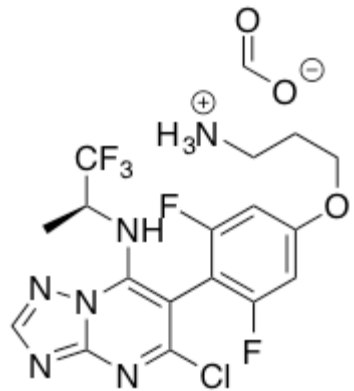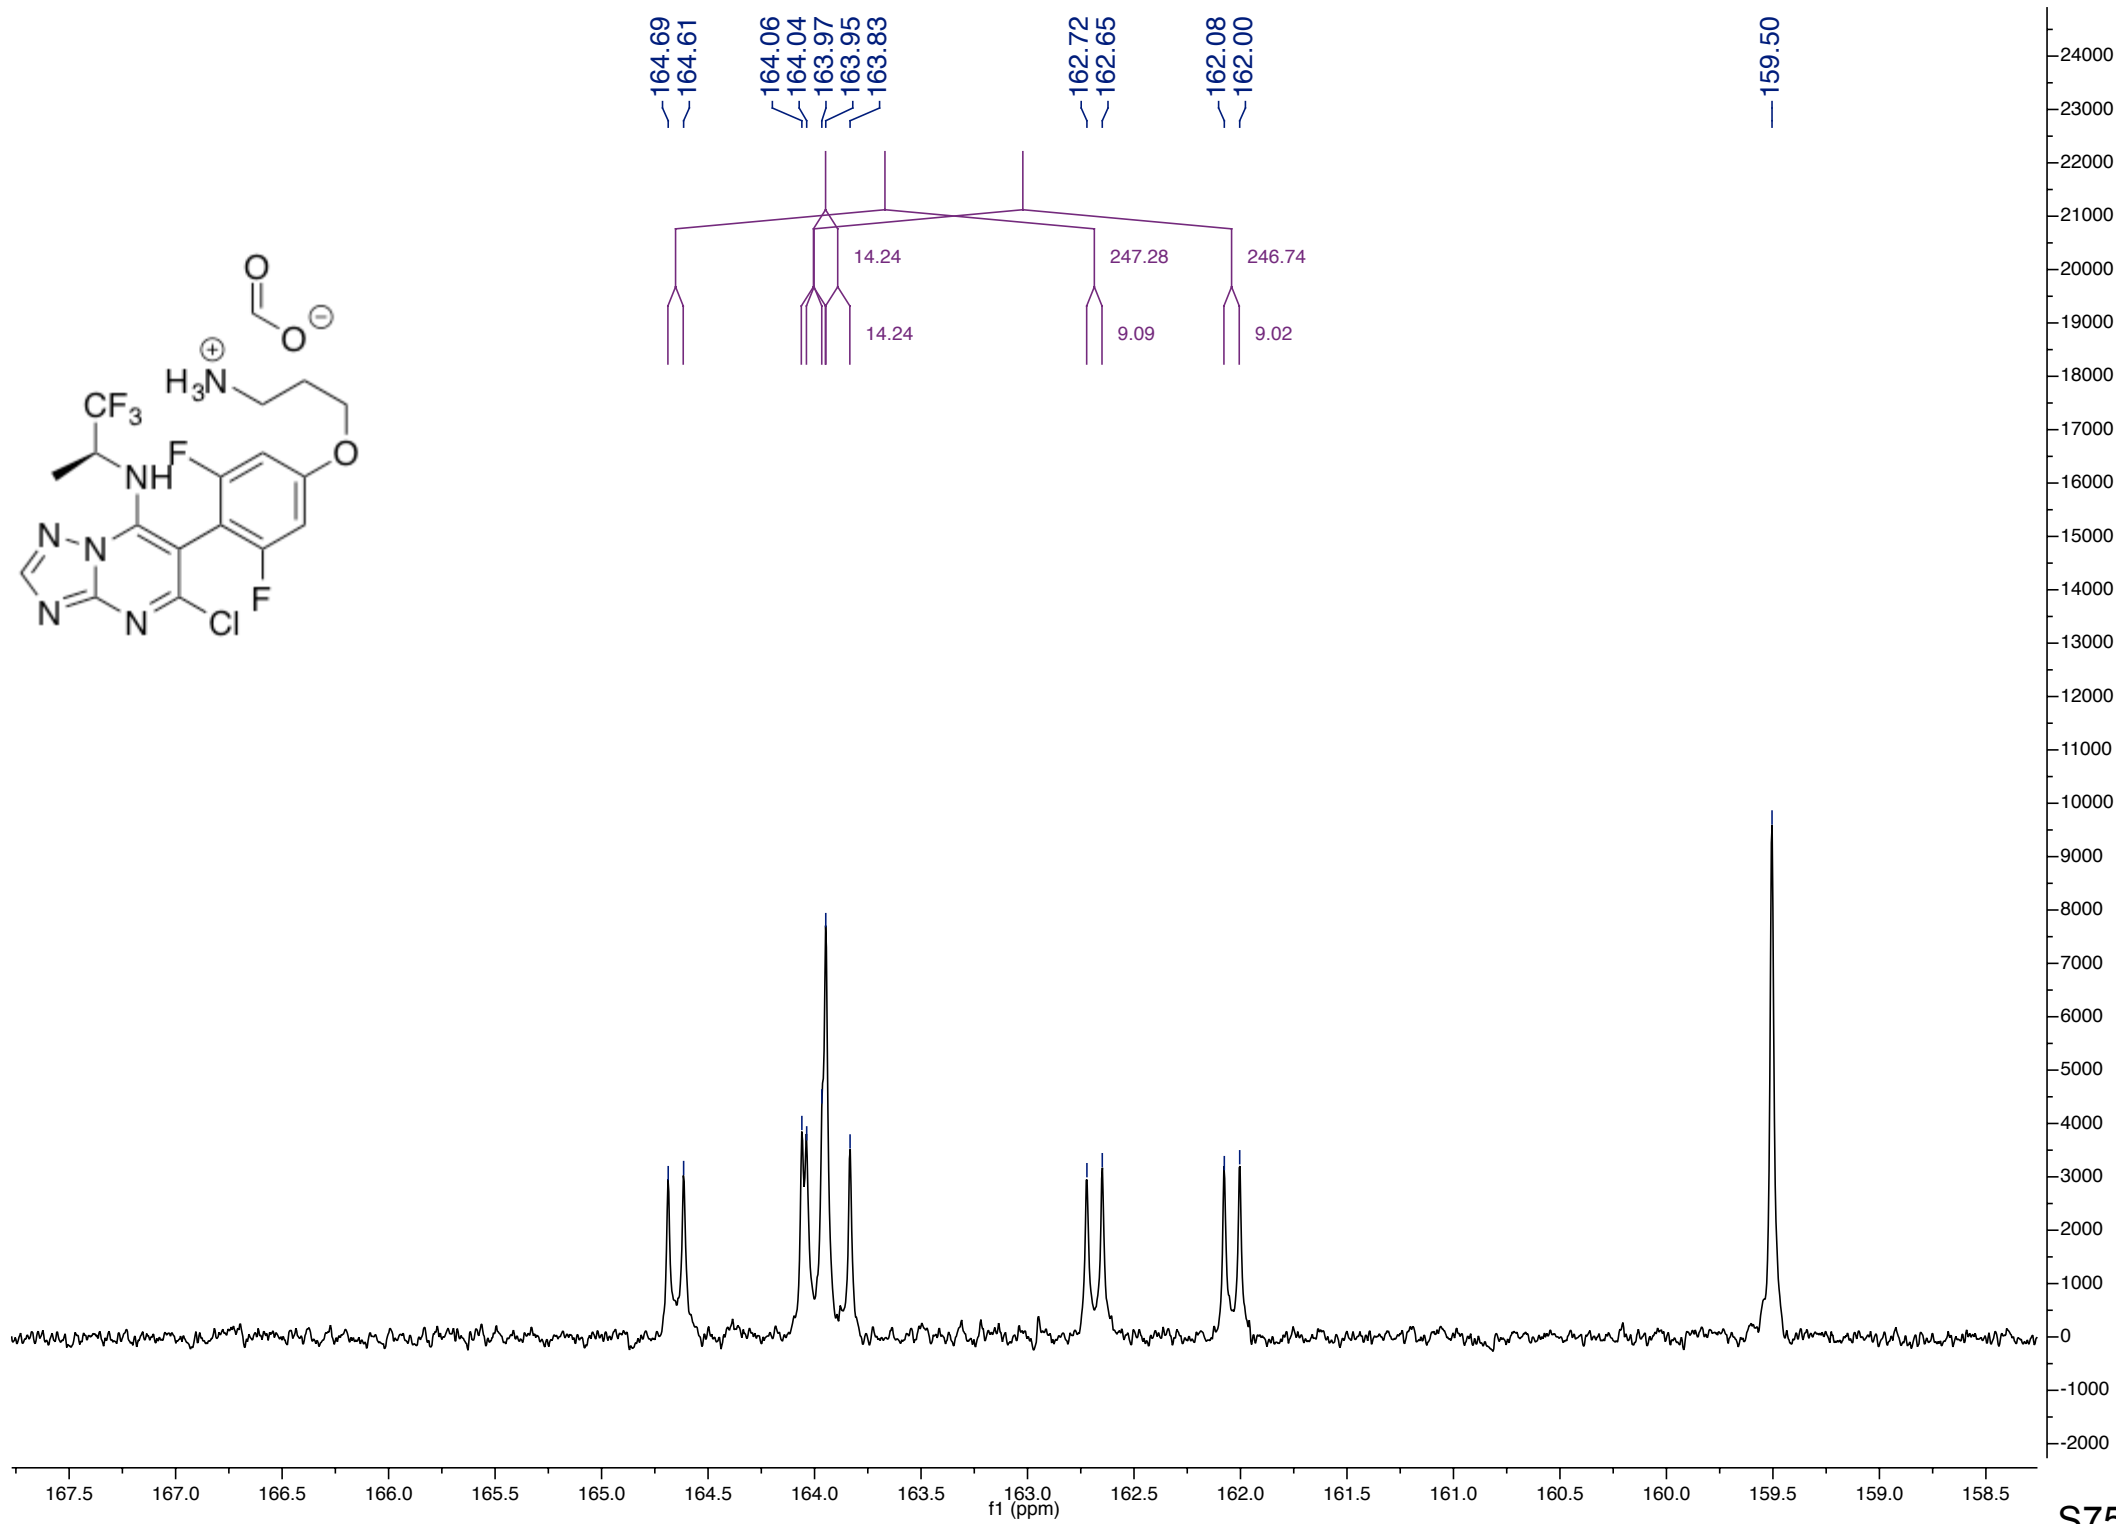

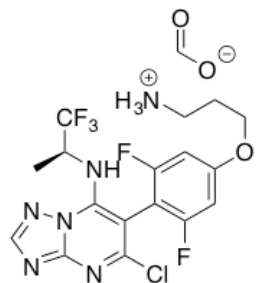

—130.06

—127.82

—125.58

—123.34

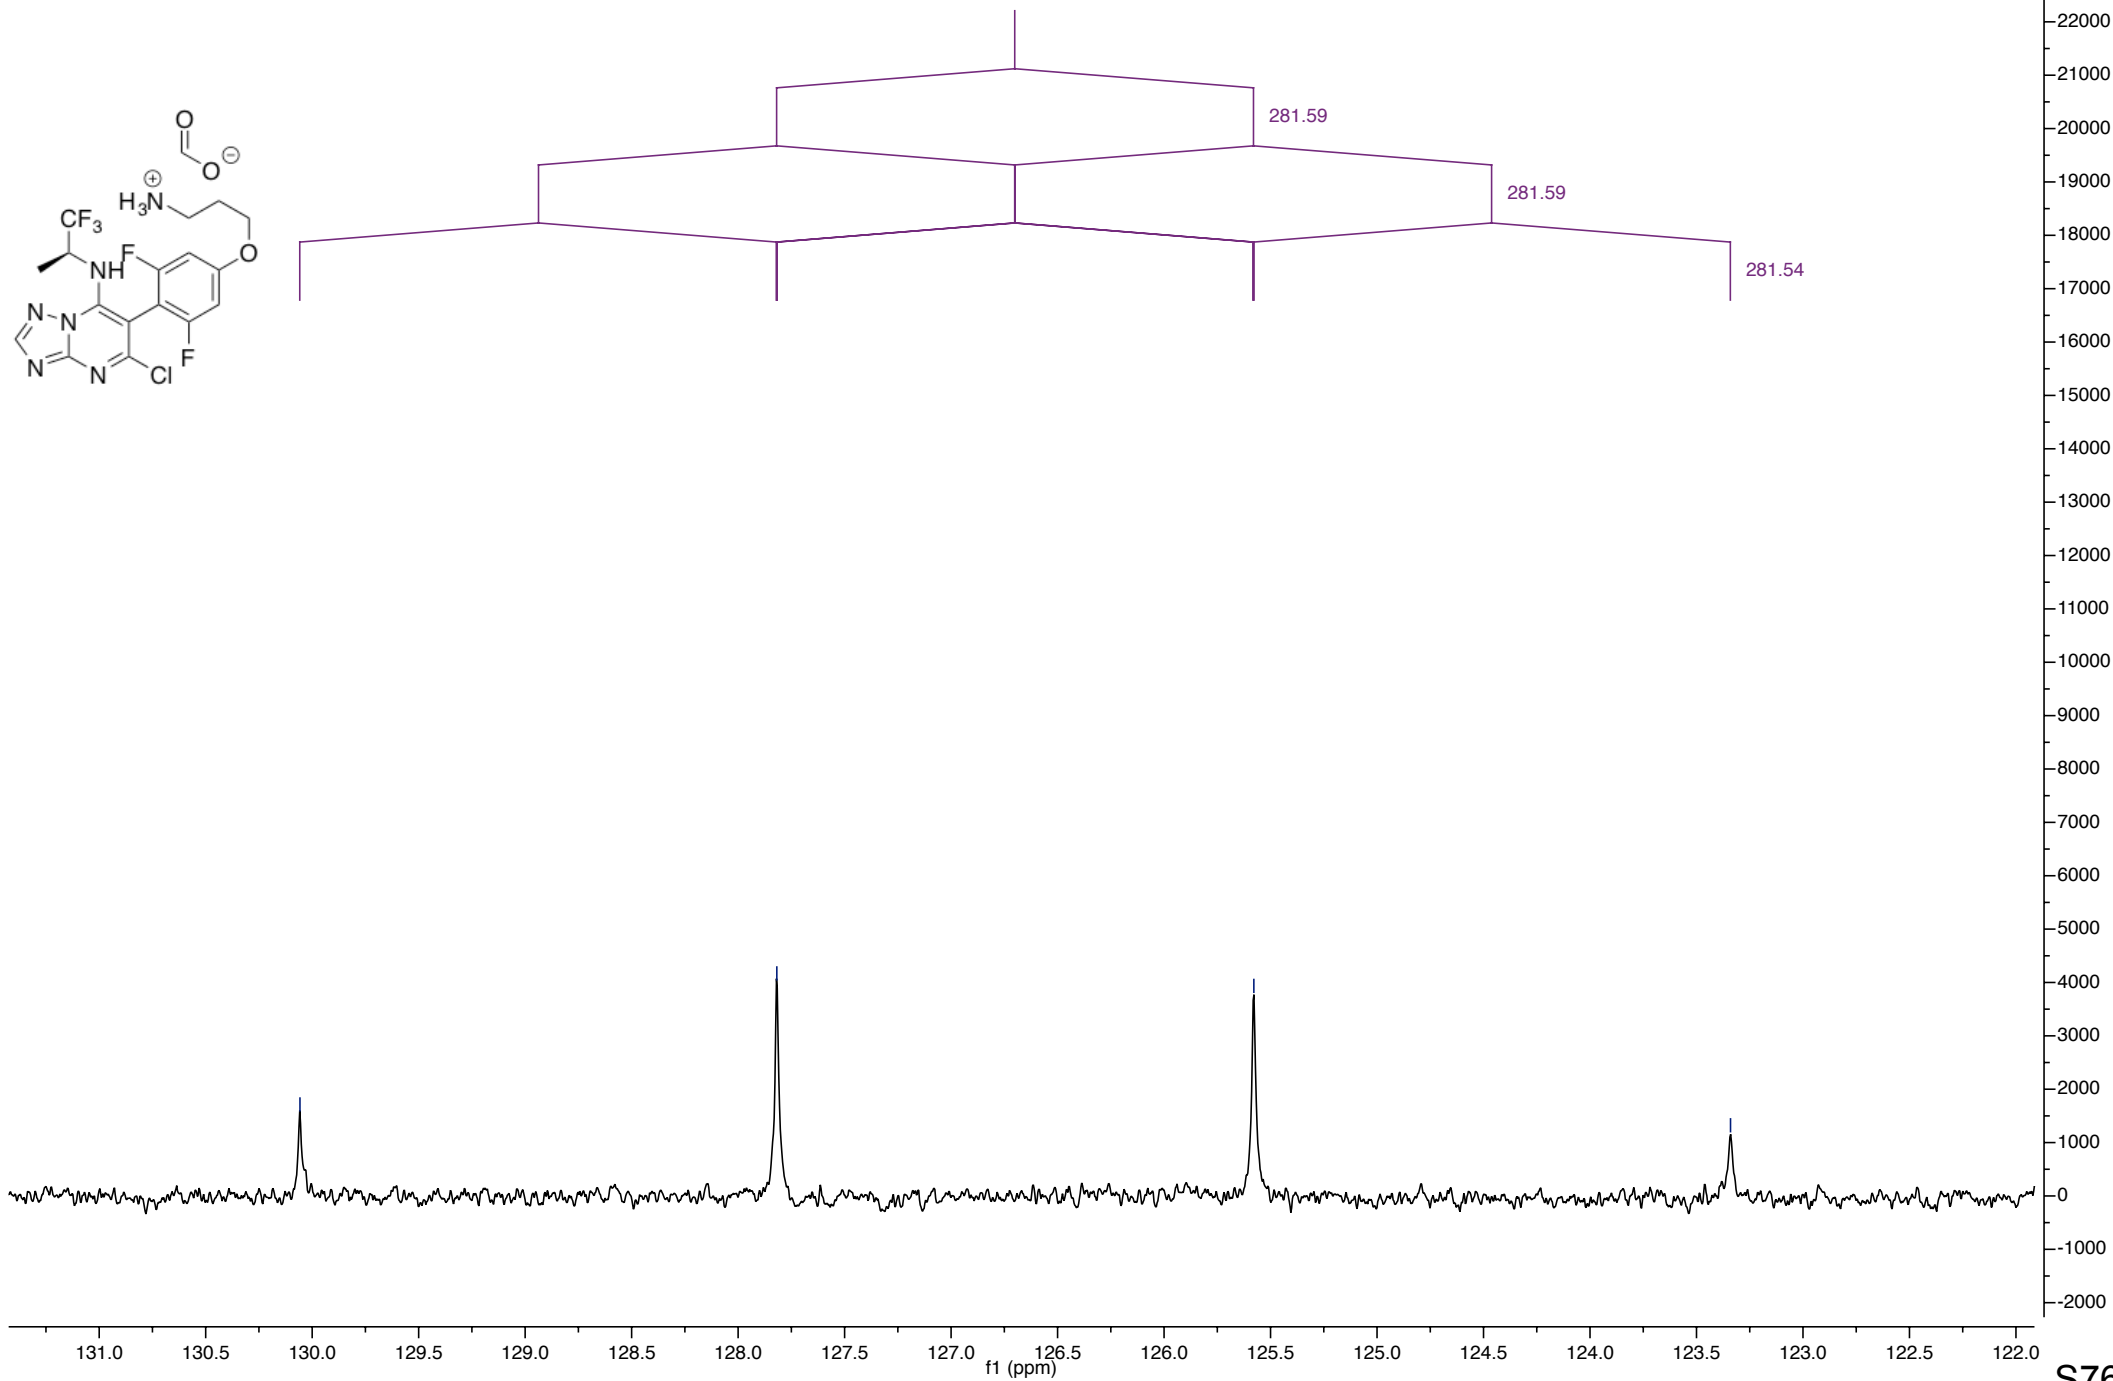

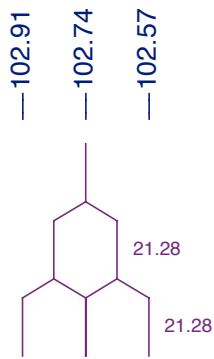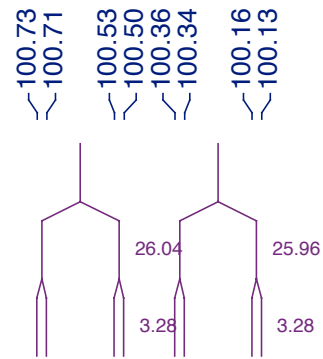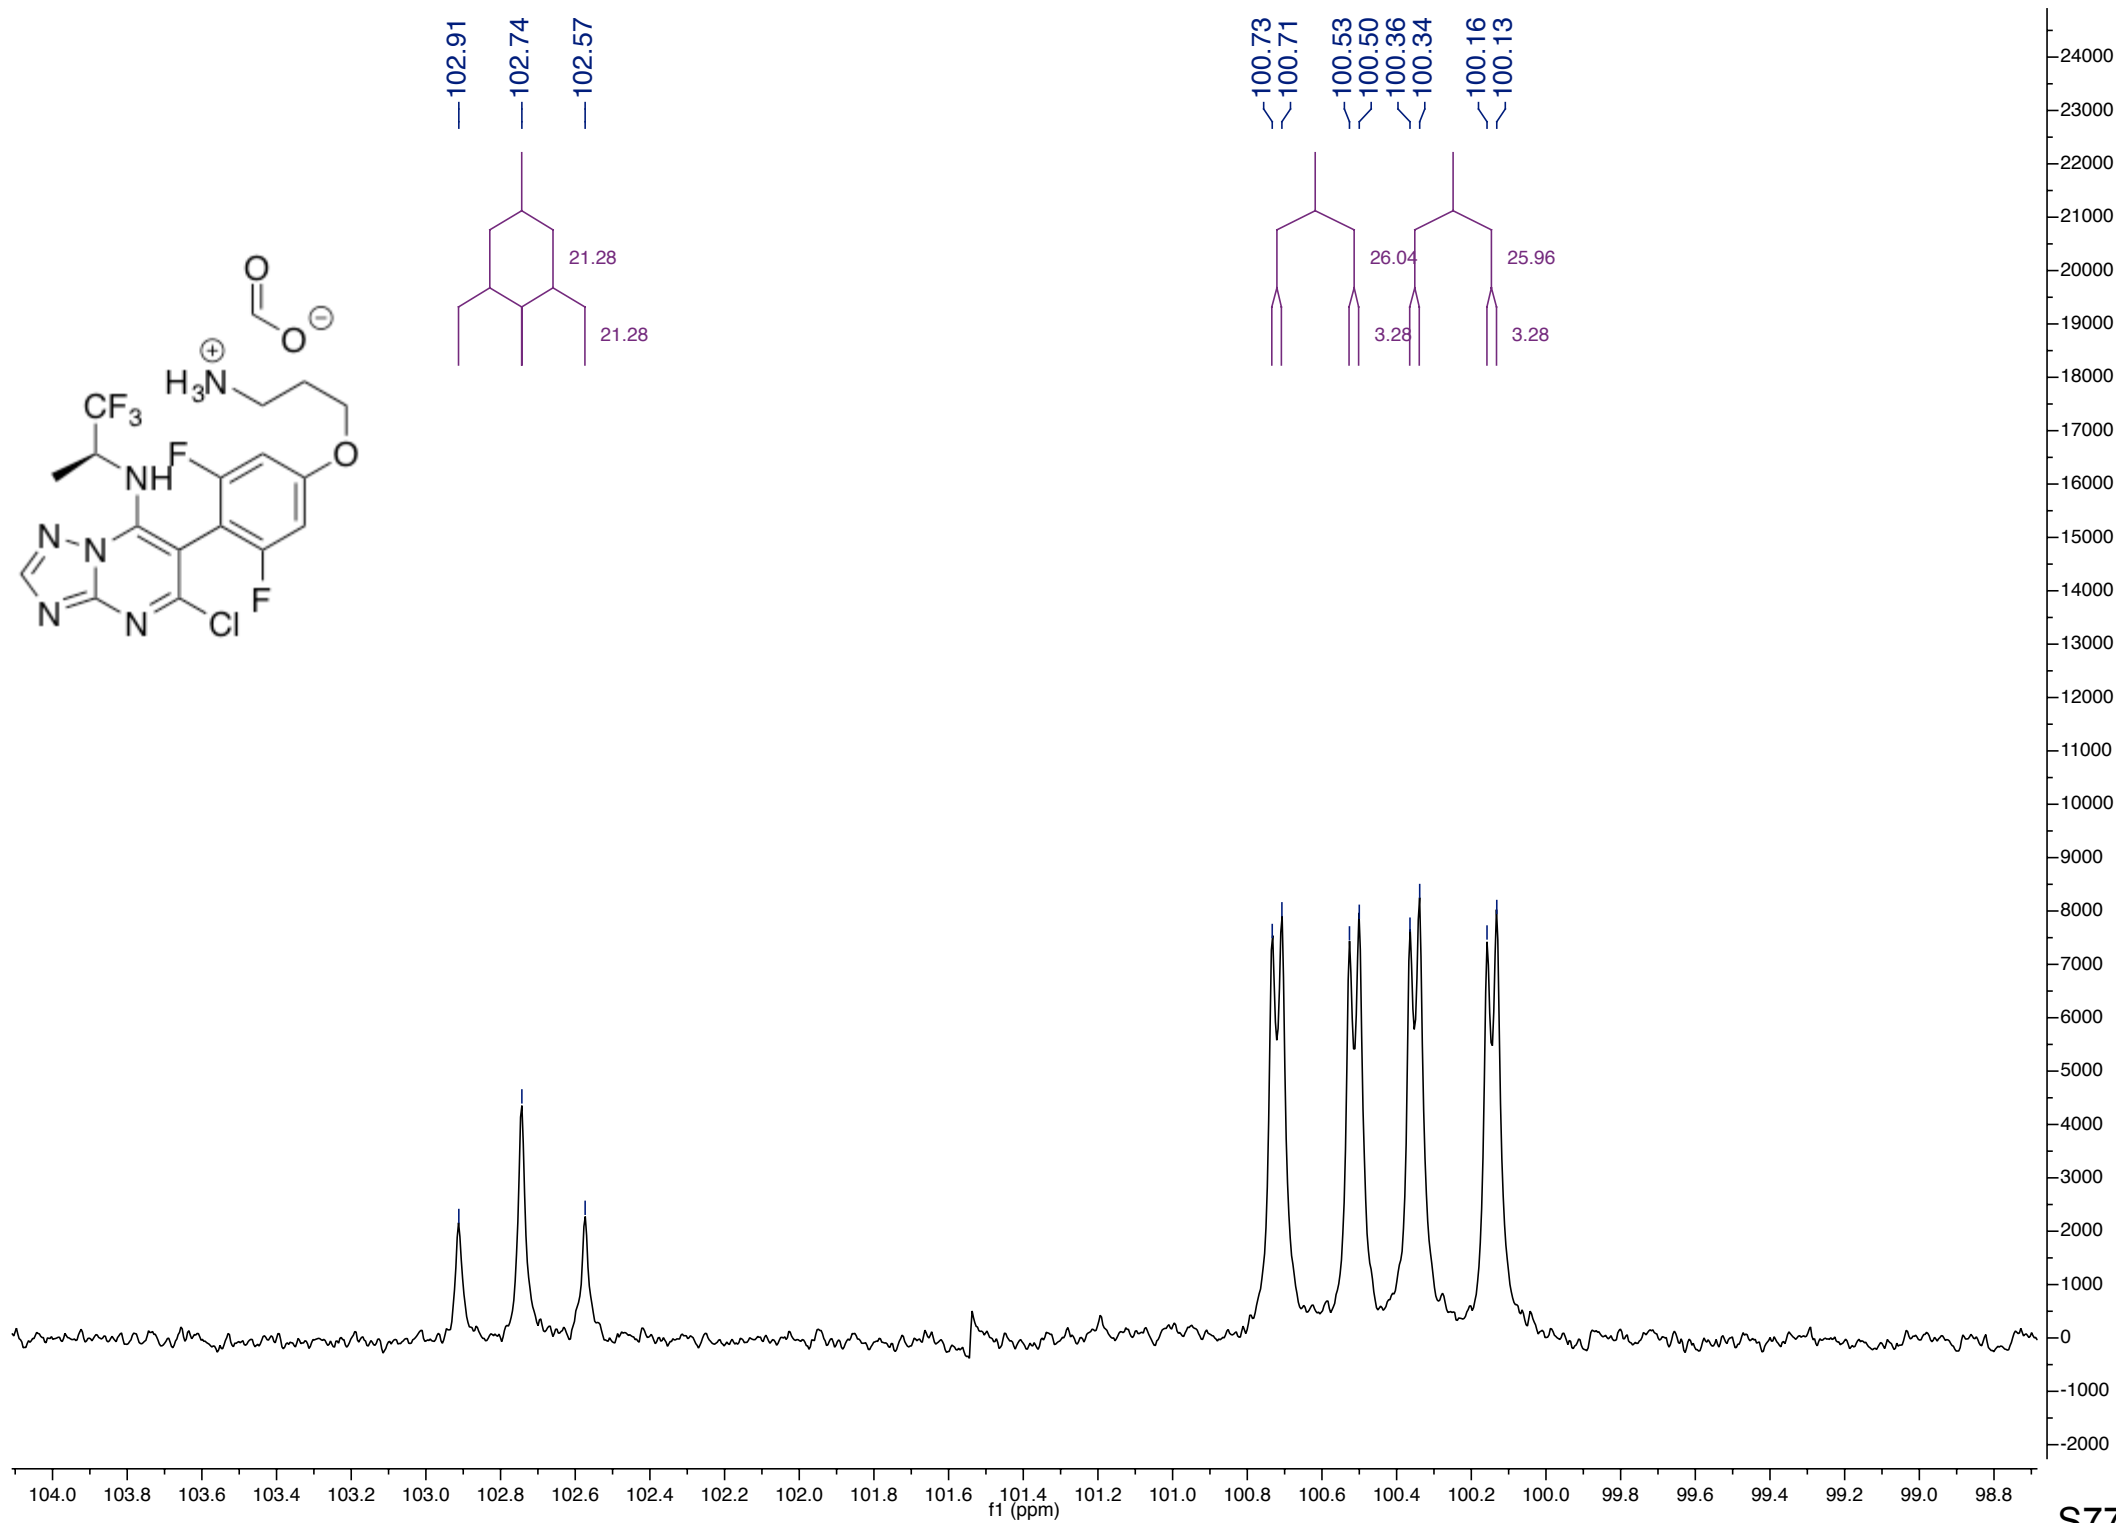



—52.75      —52.50      —52.25      —52.00

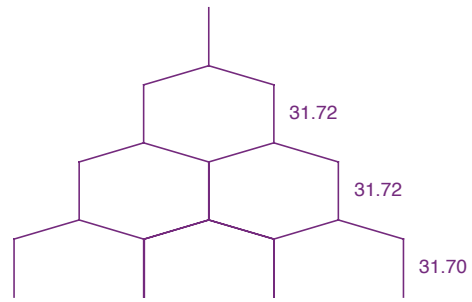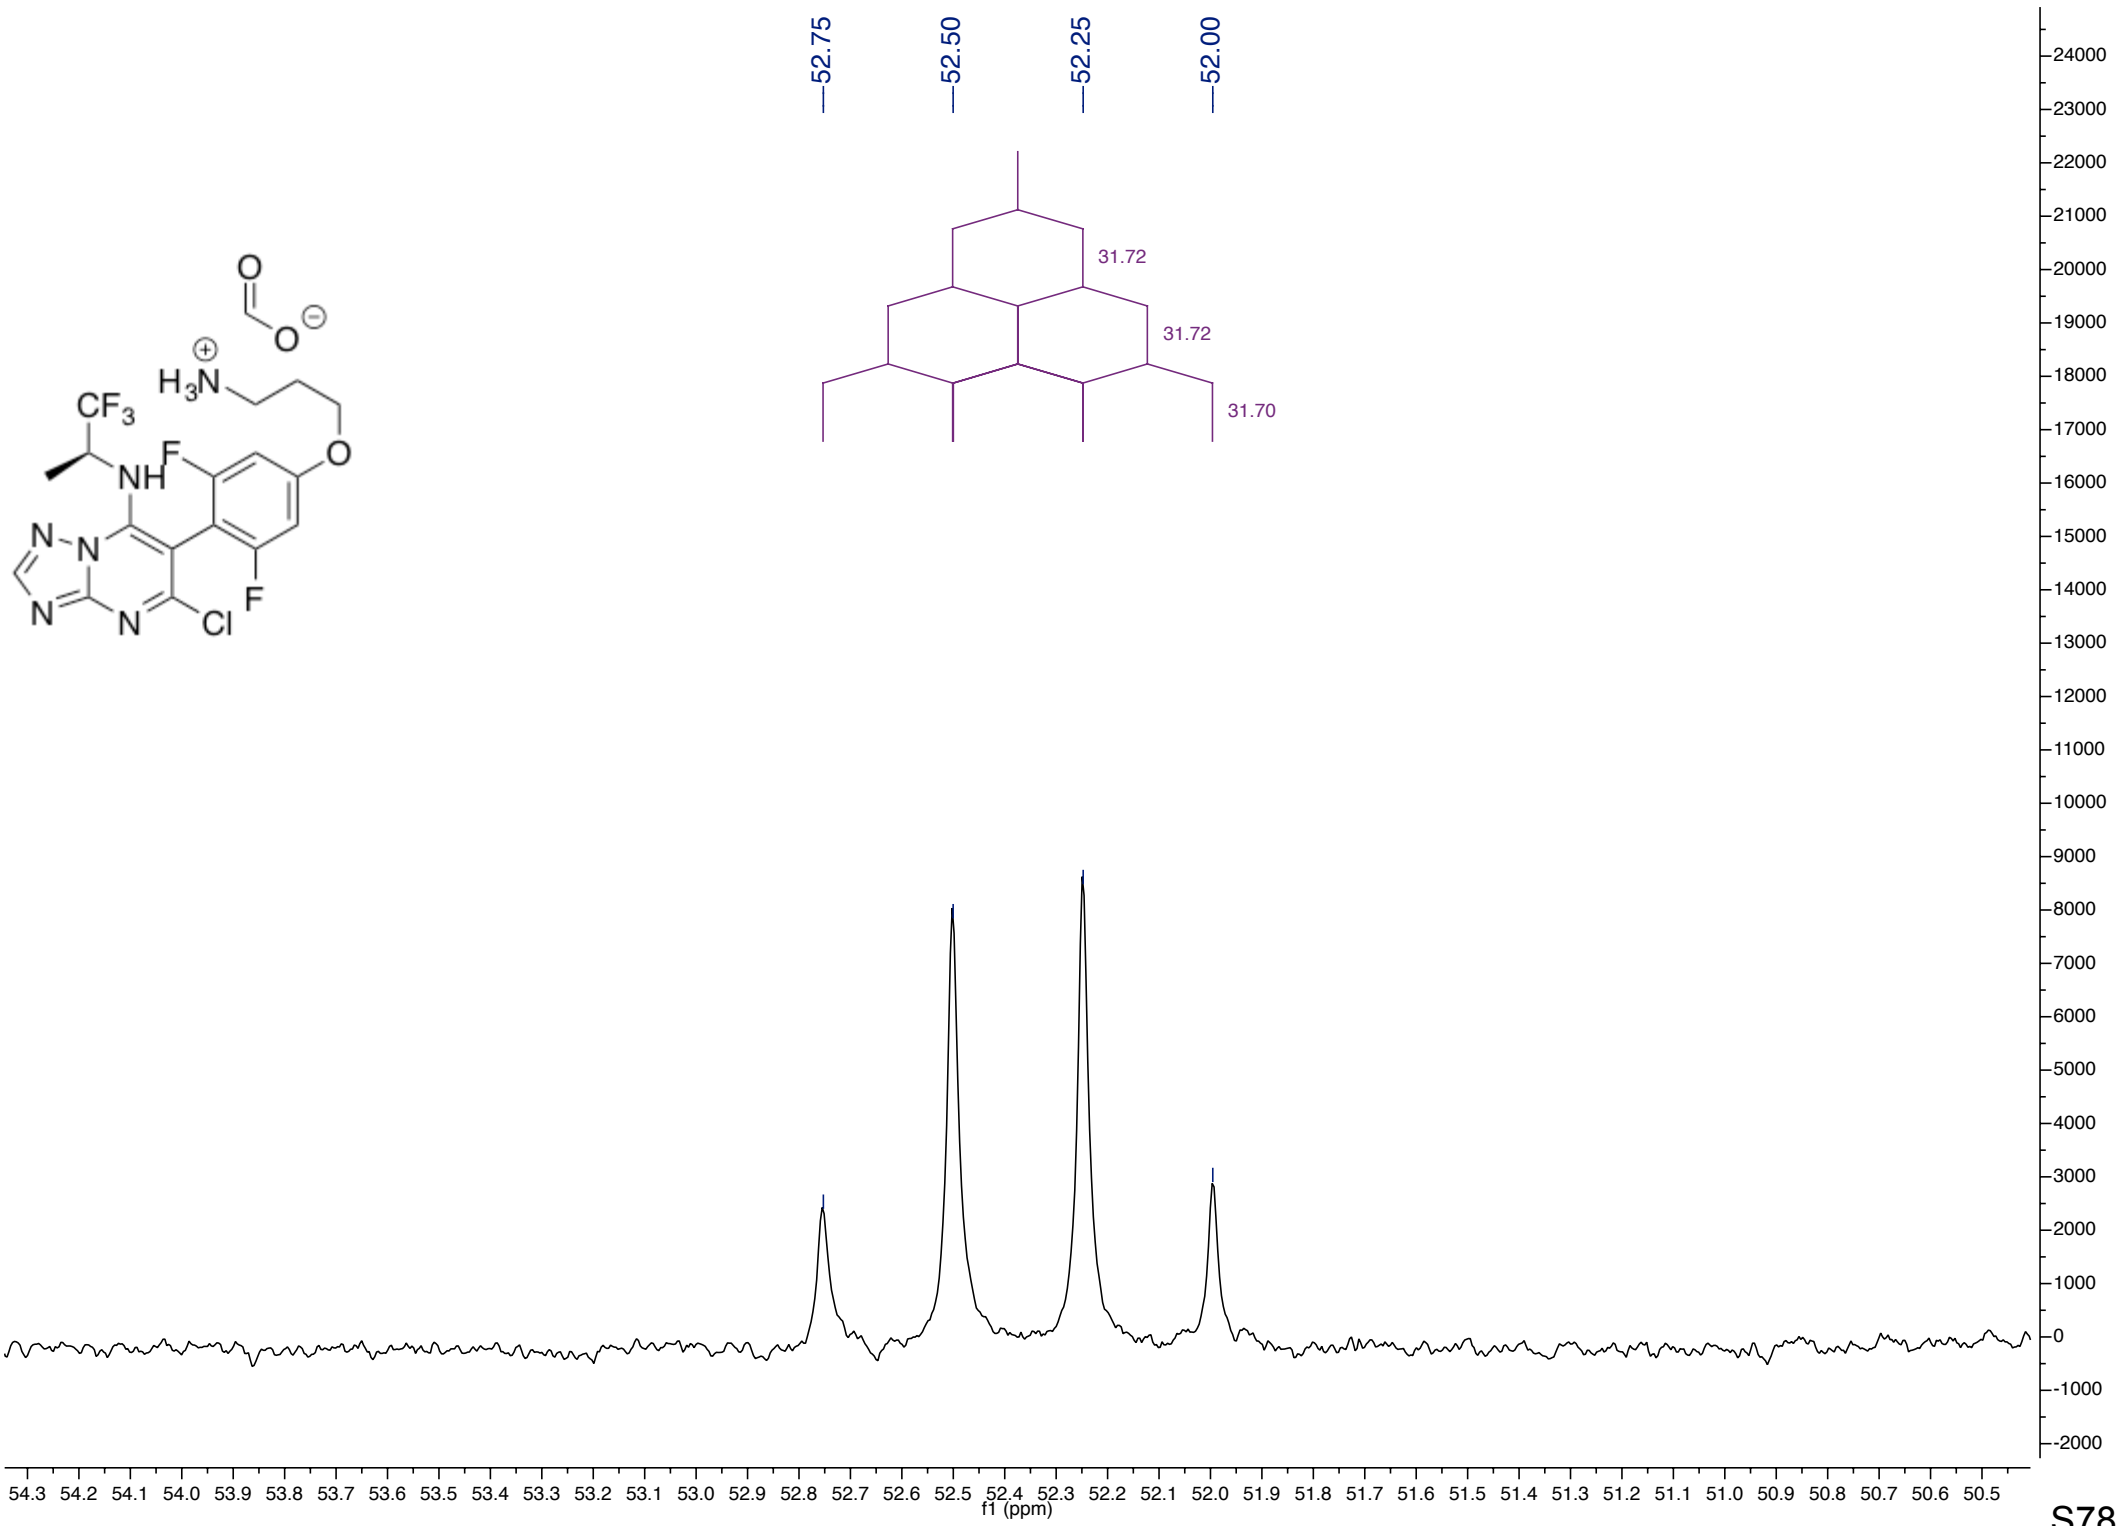

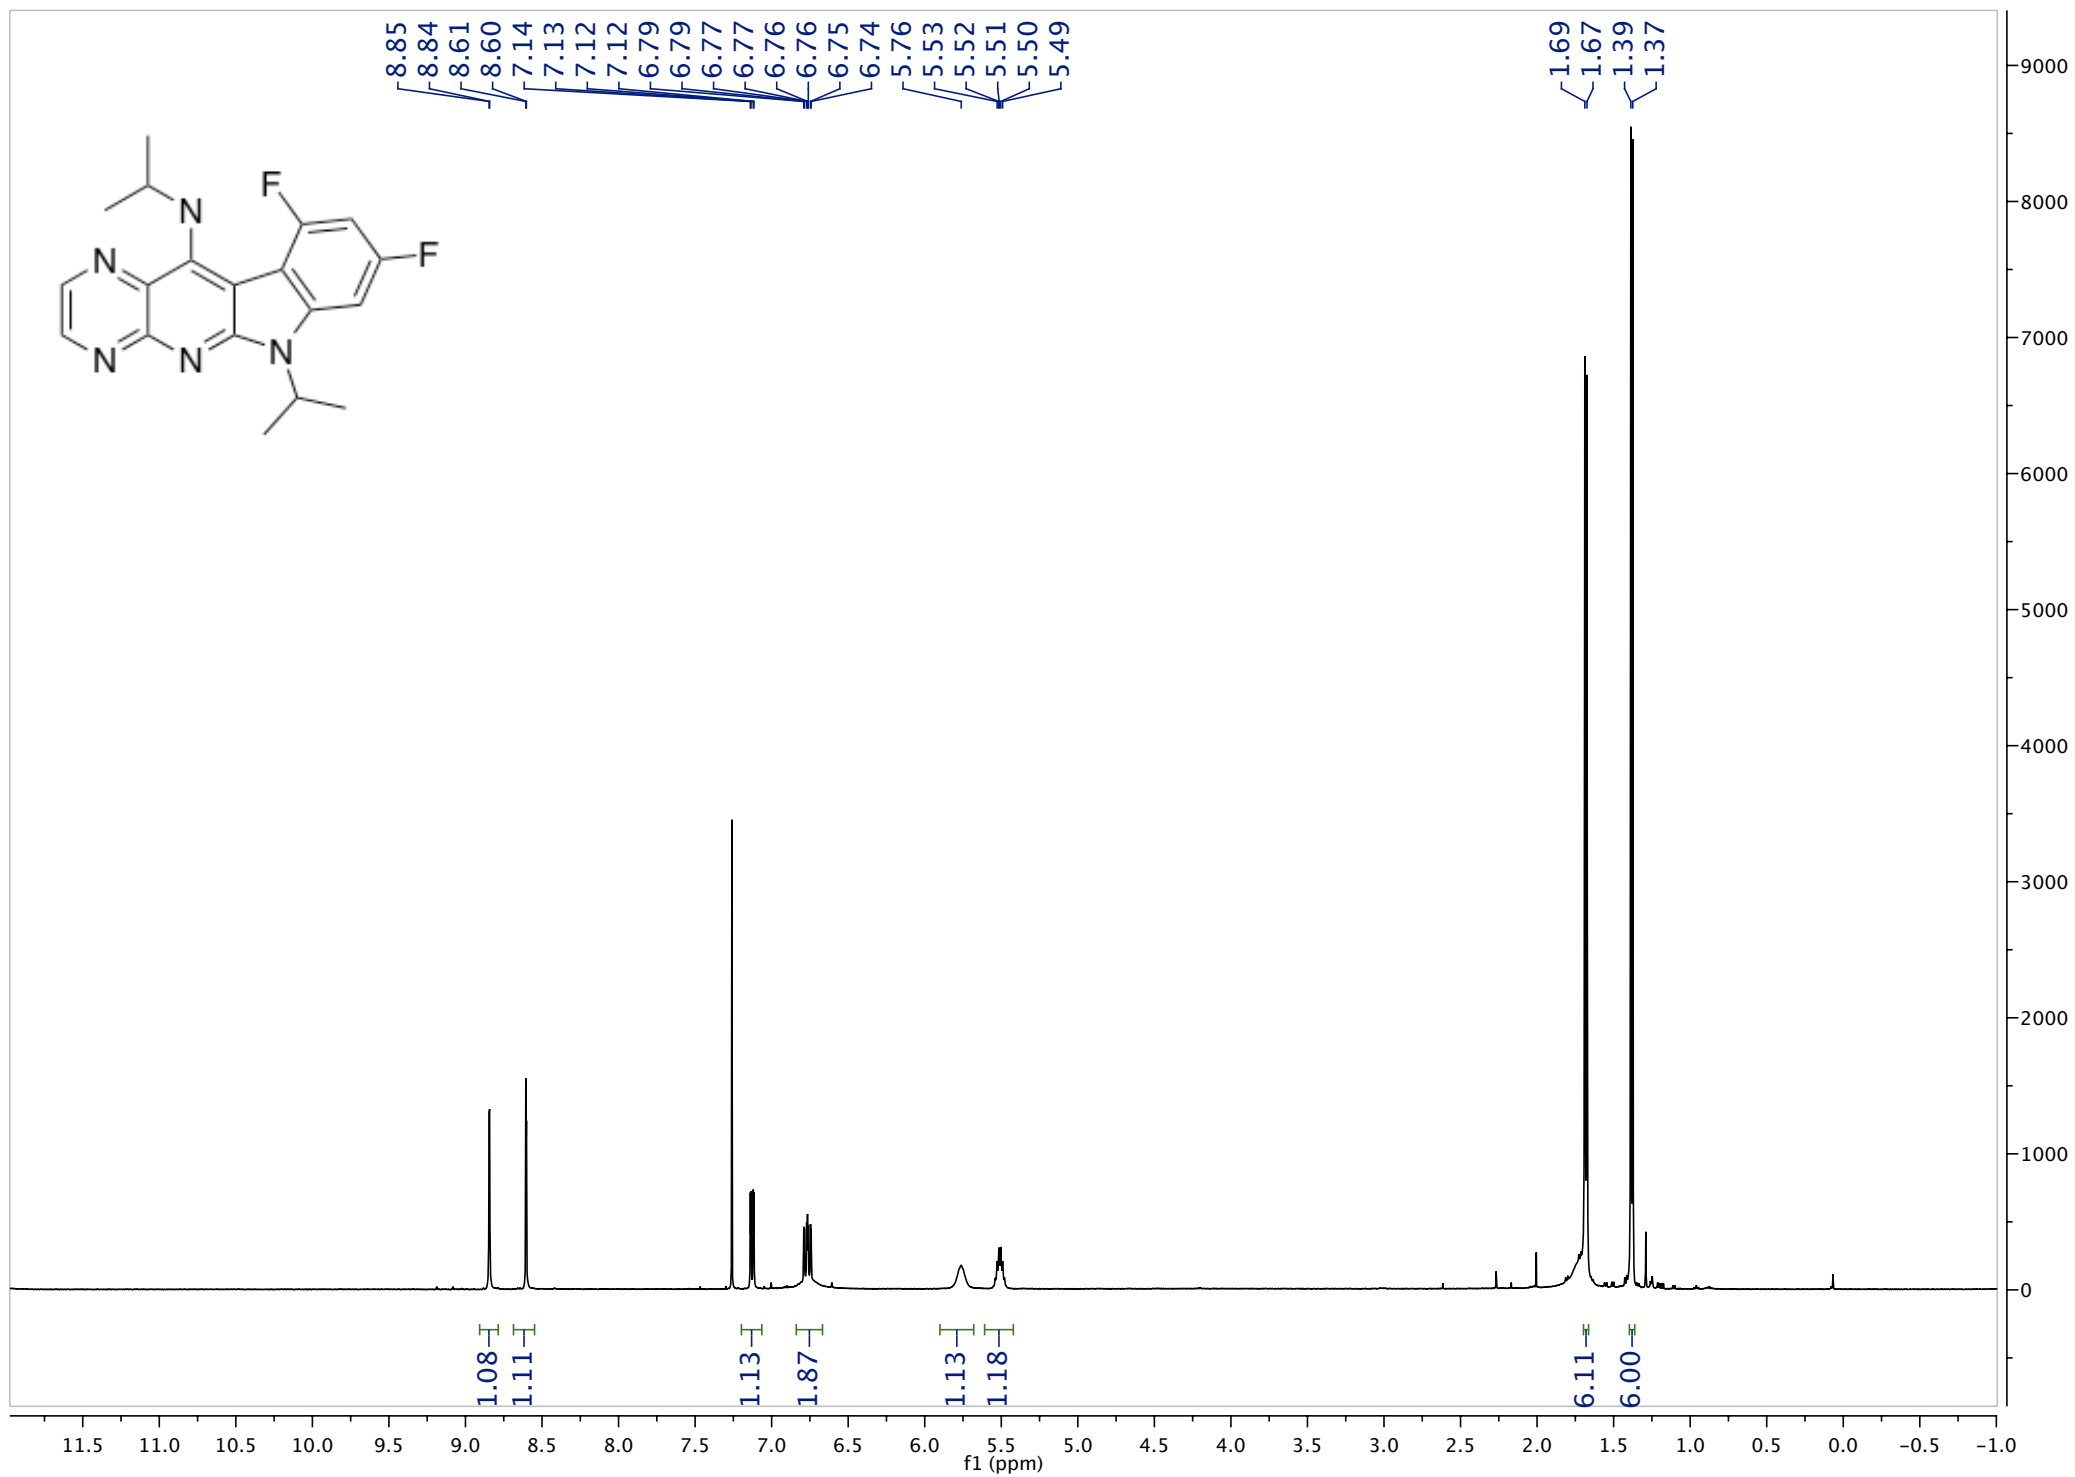

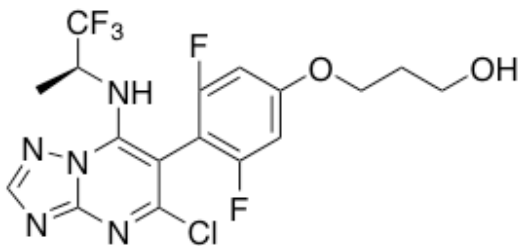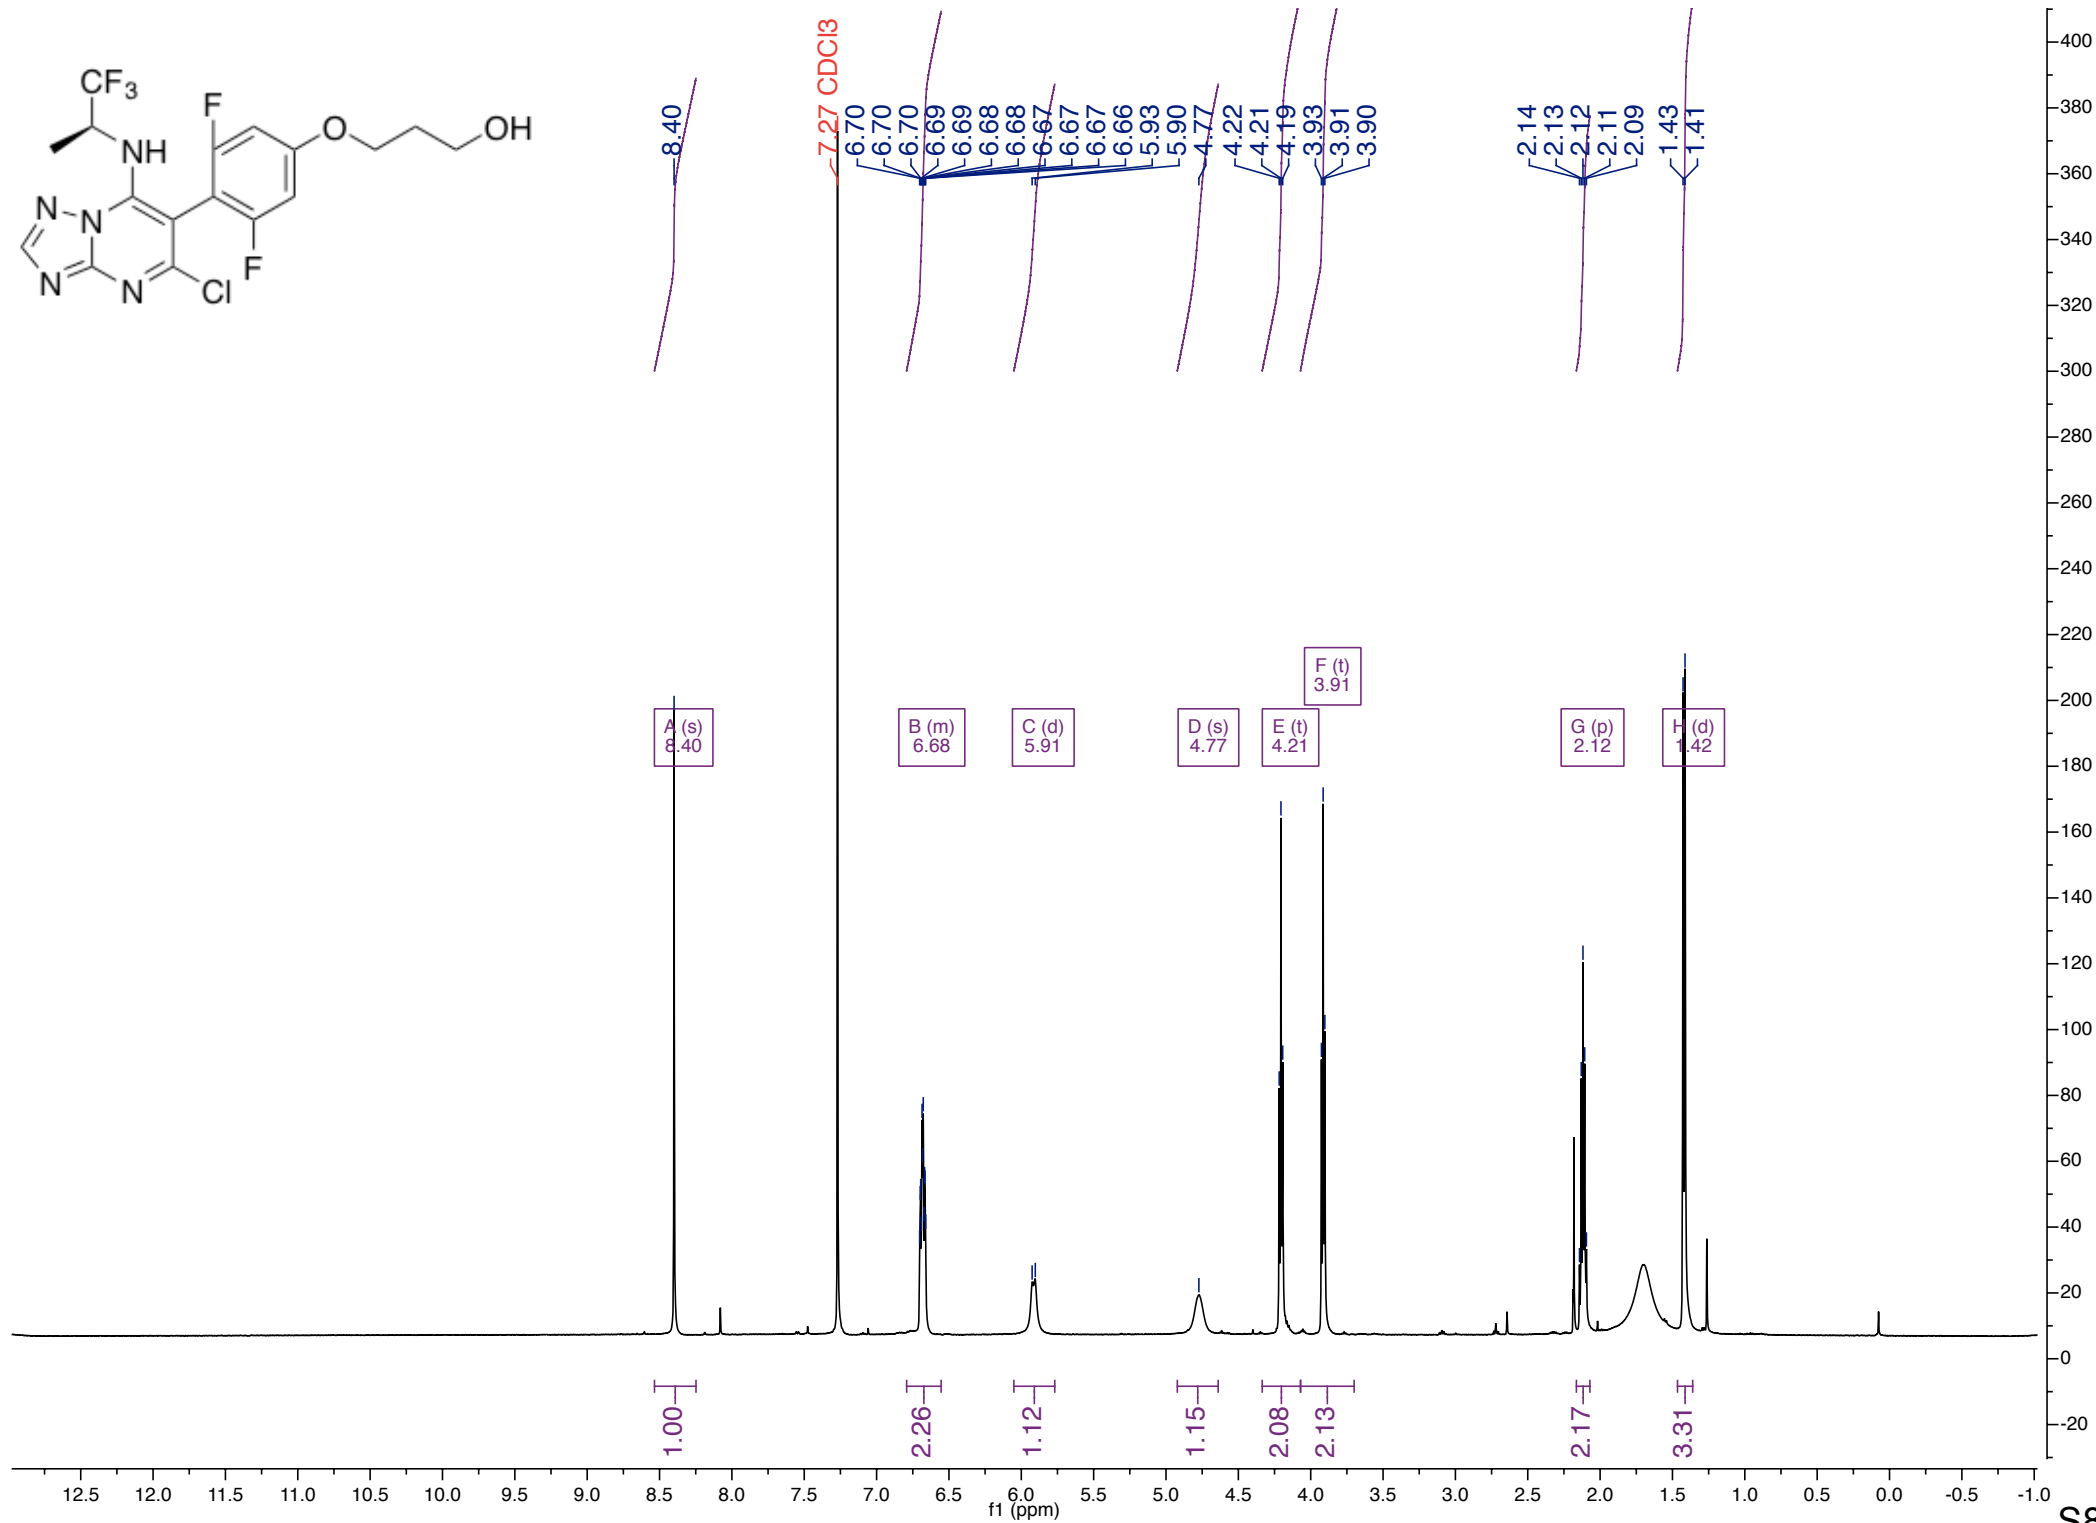



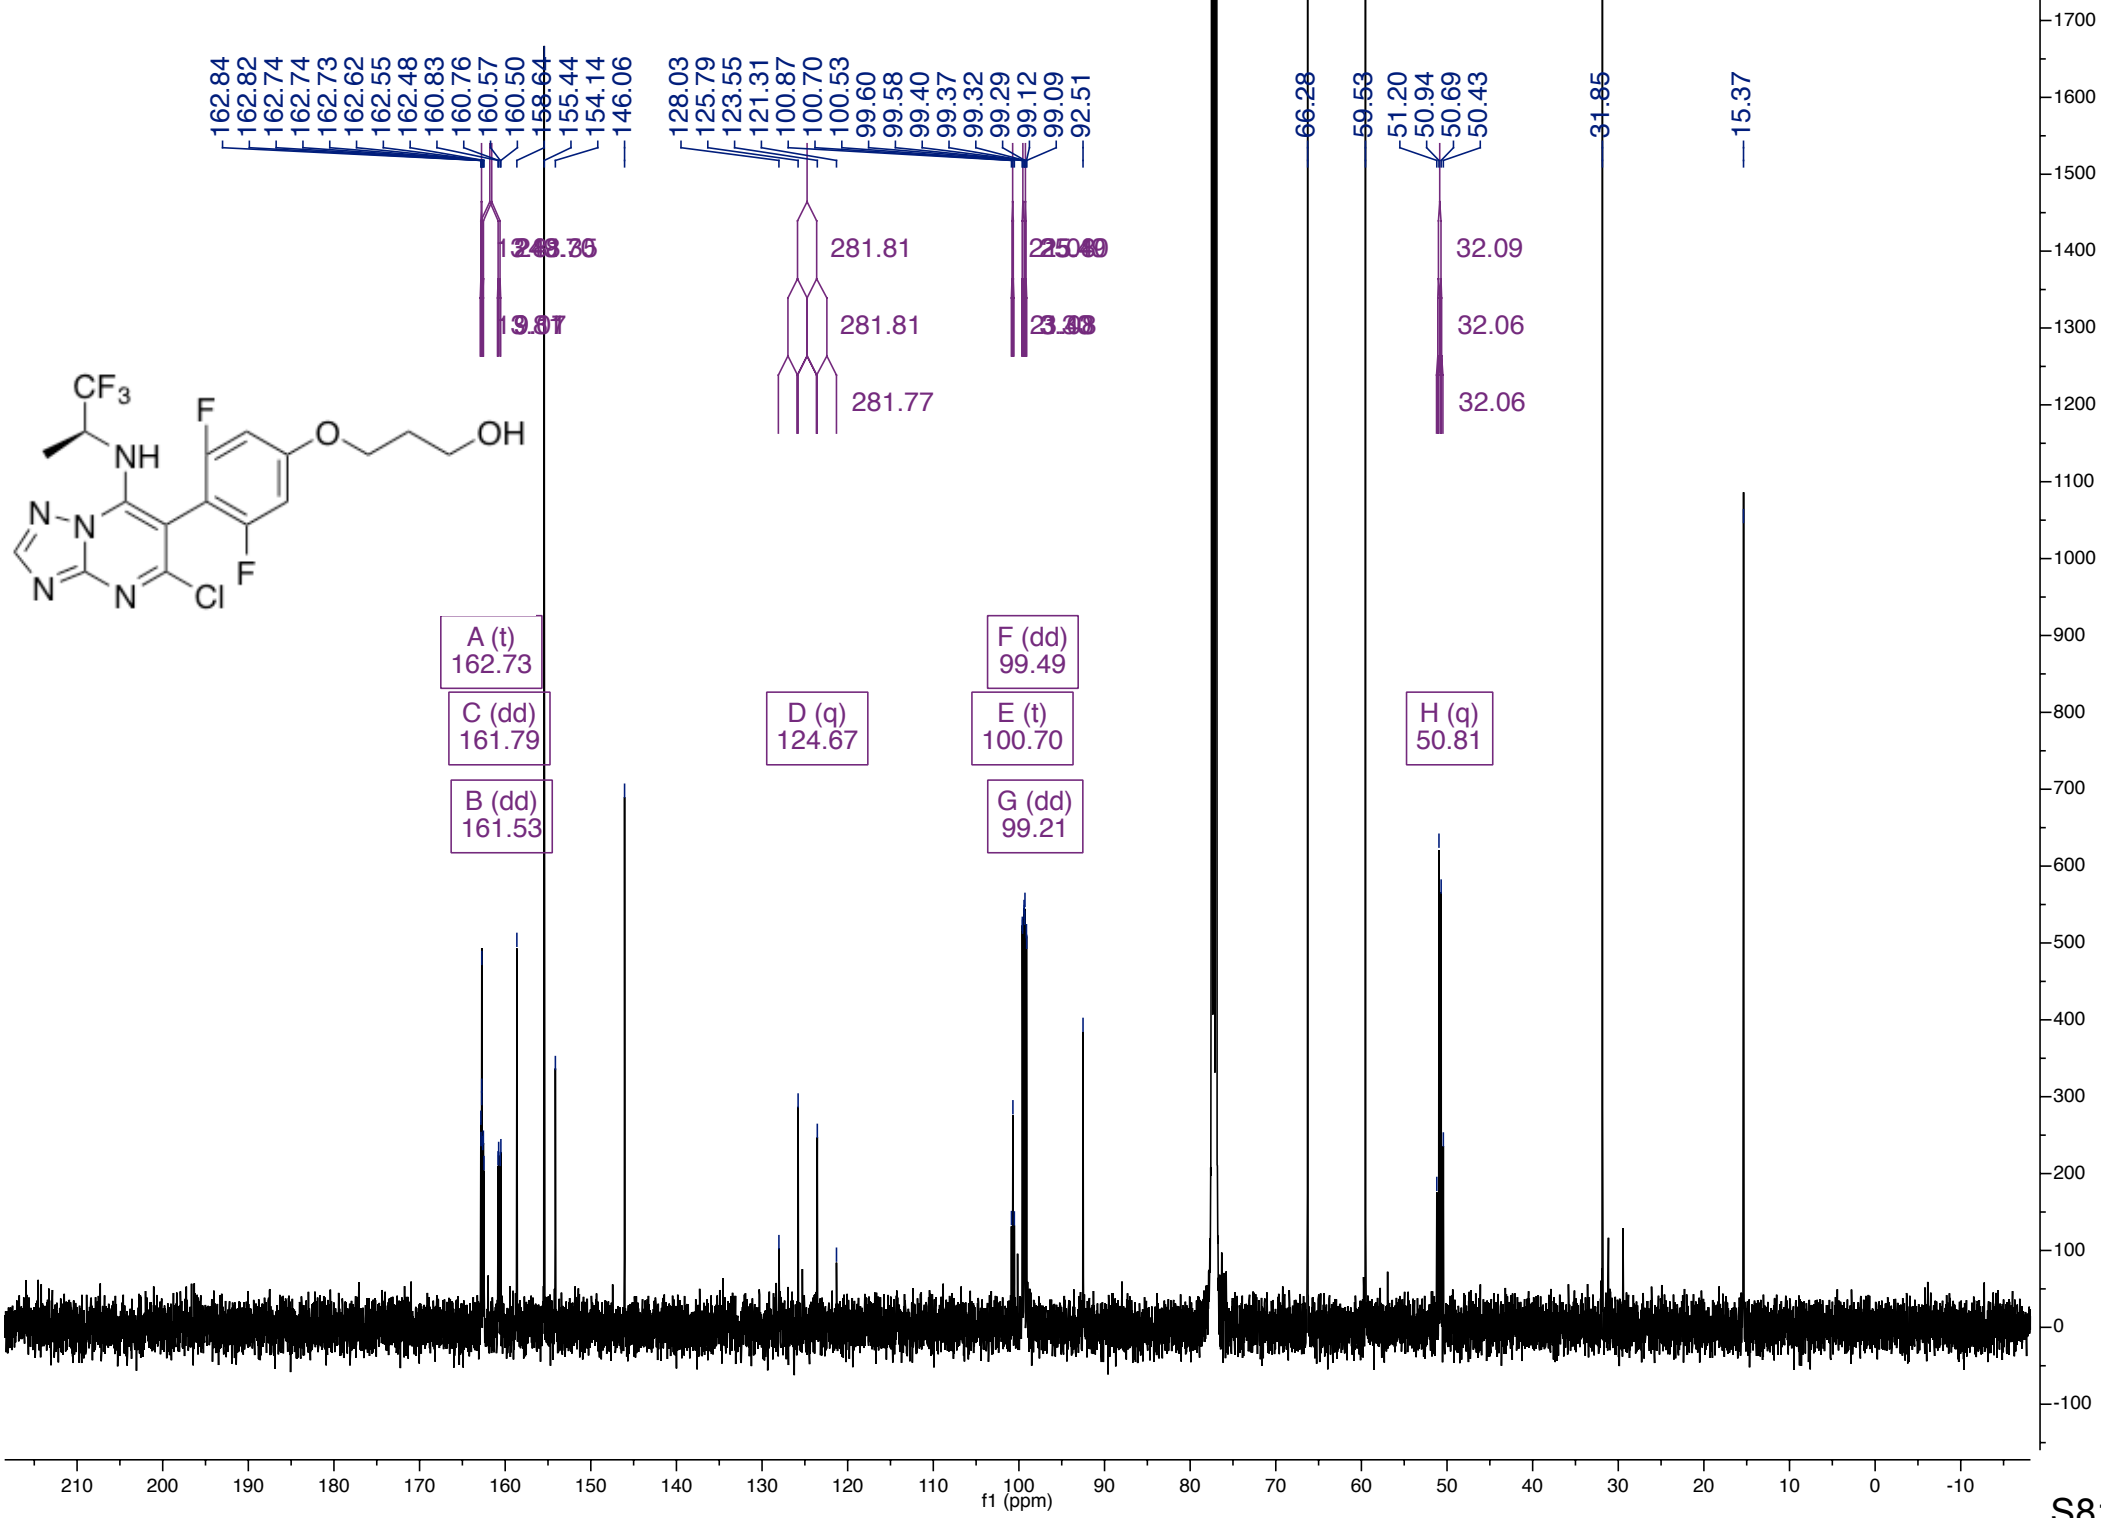

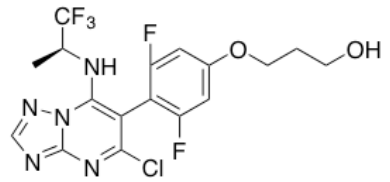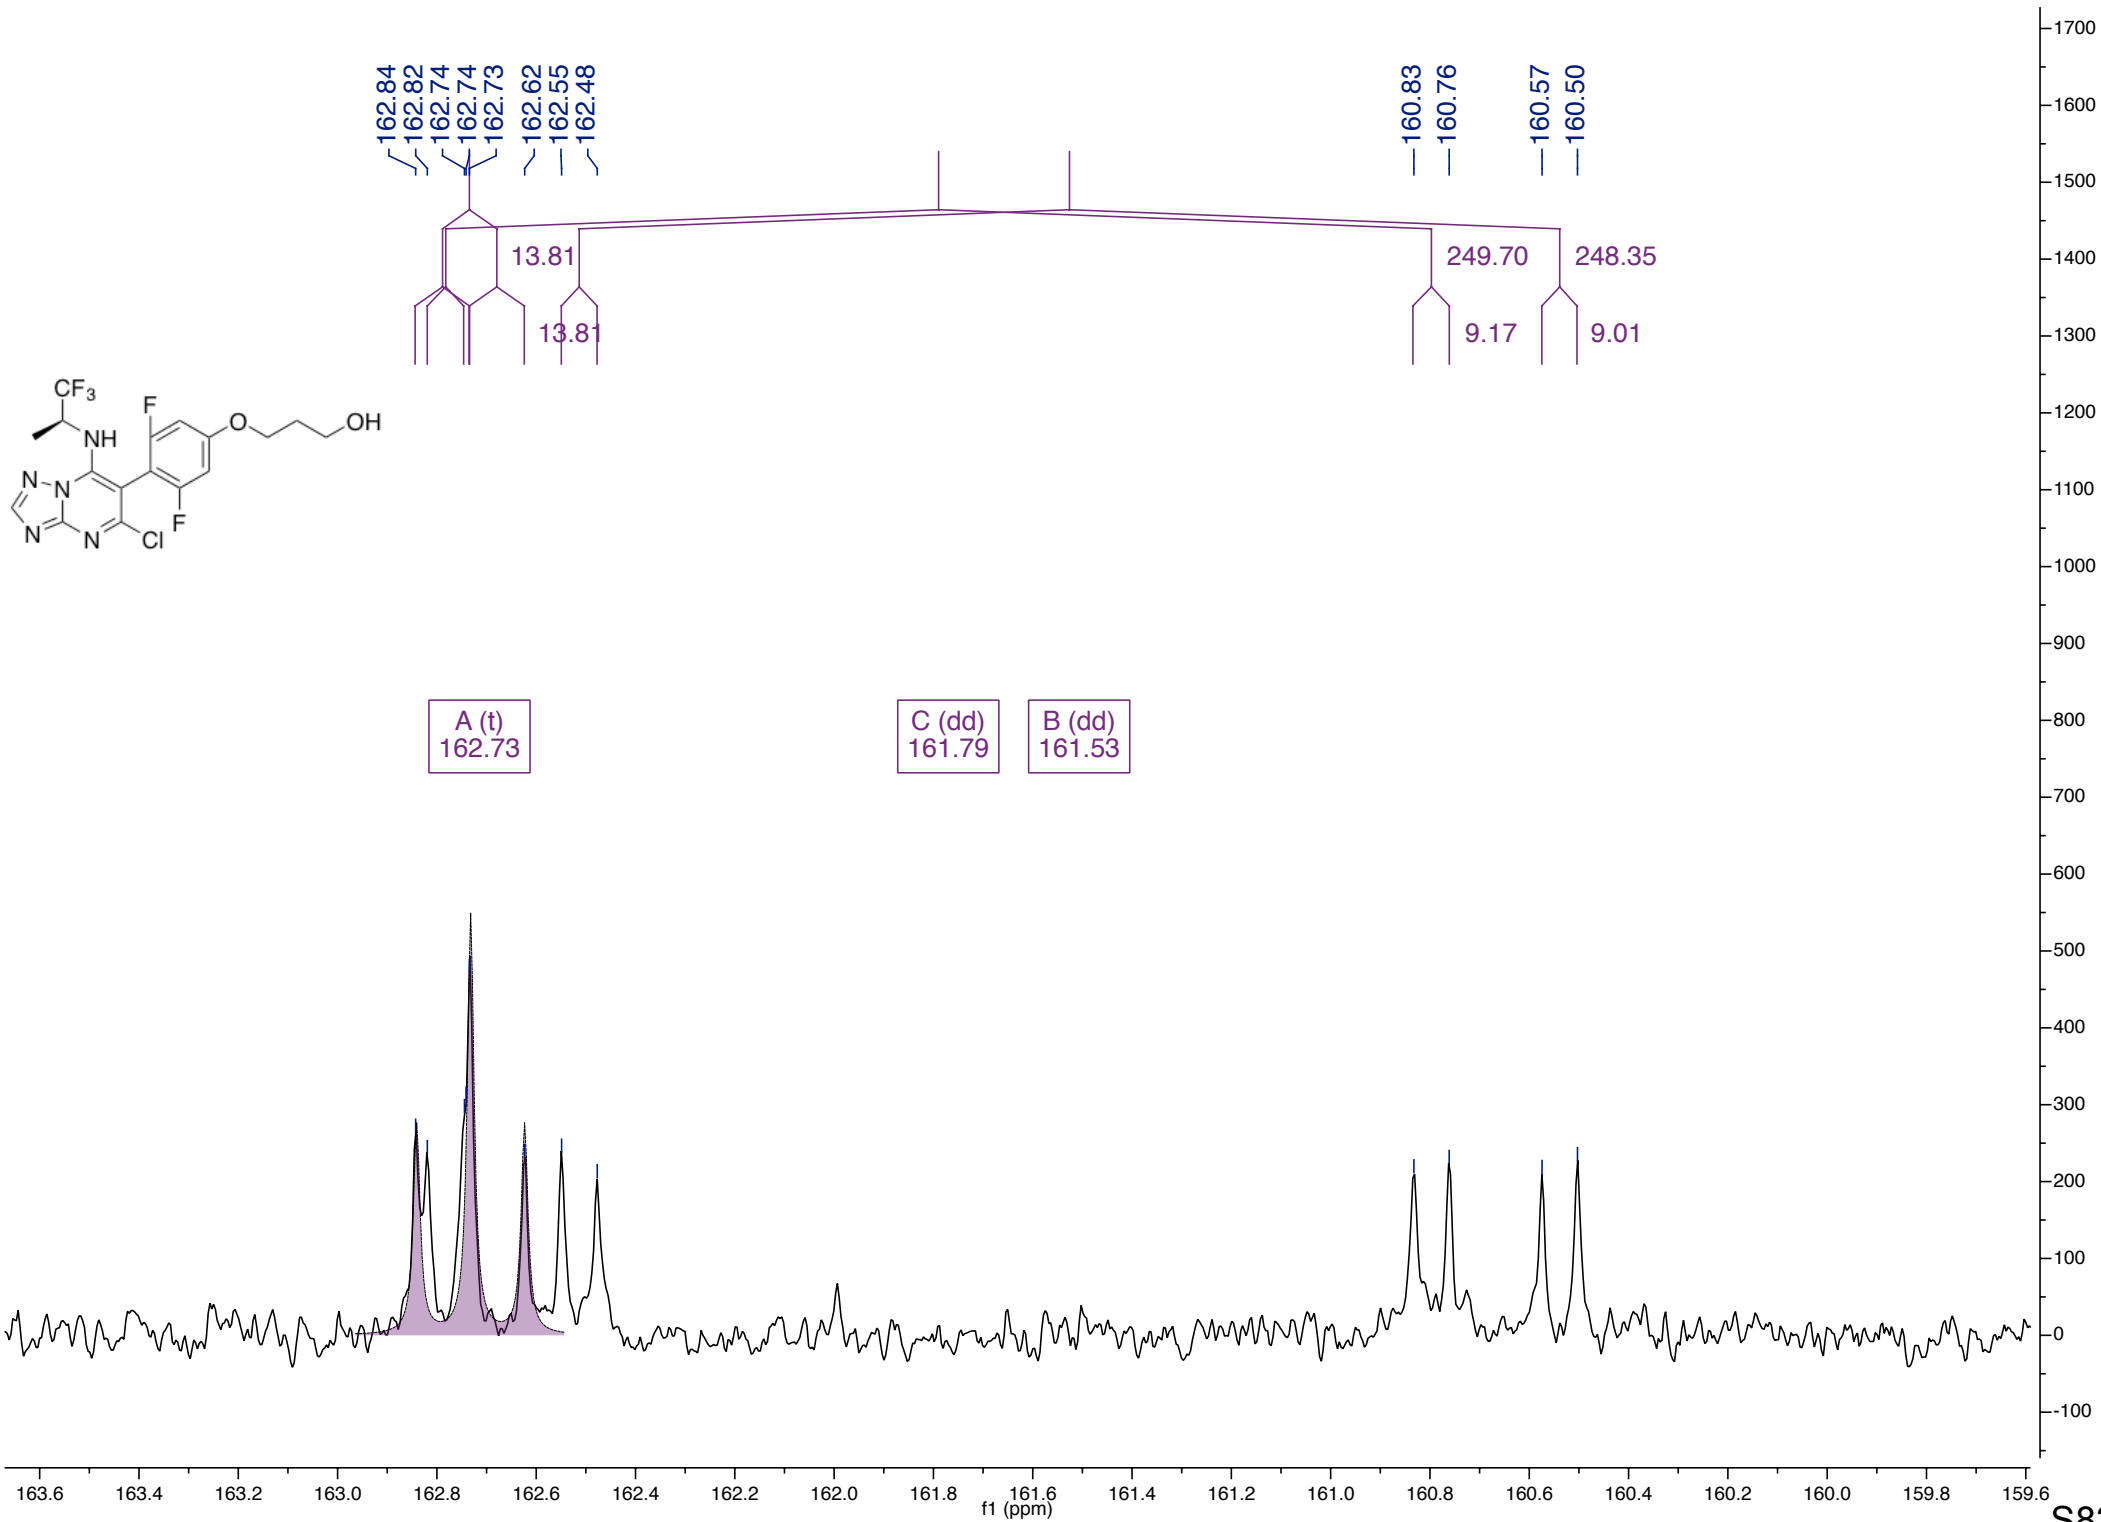

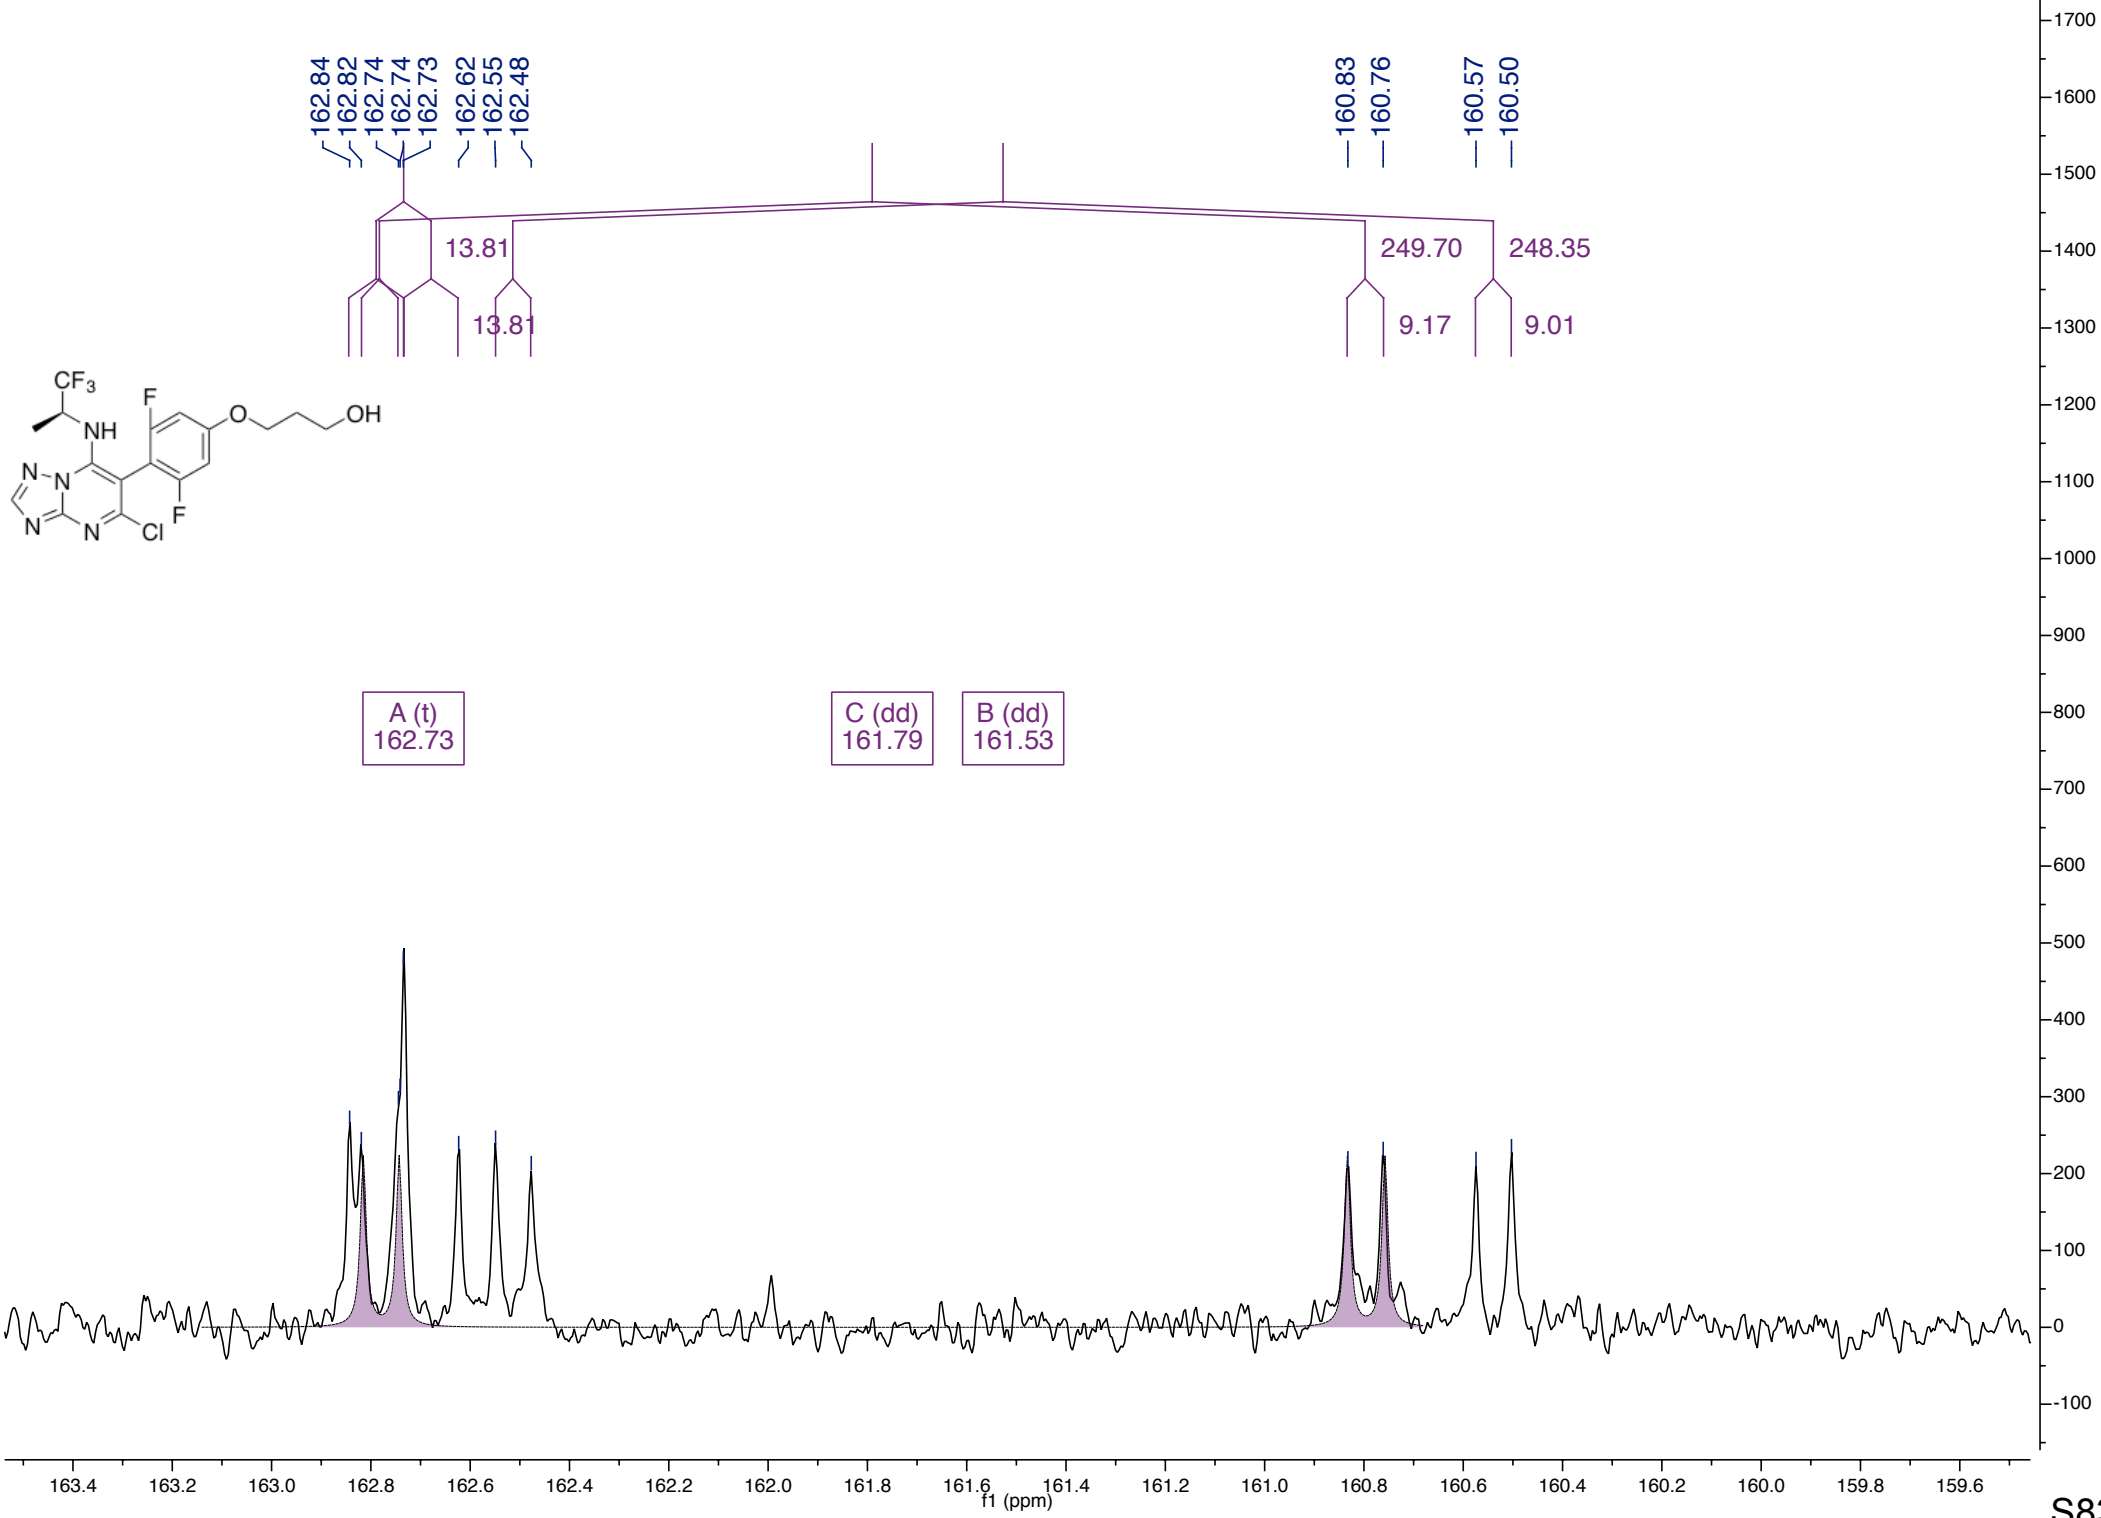

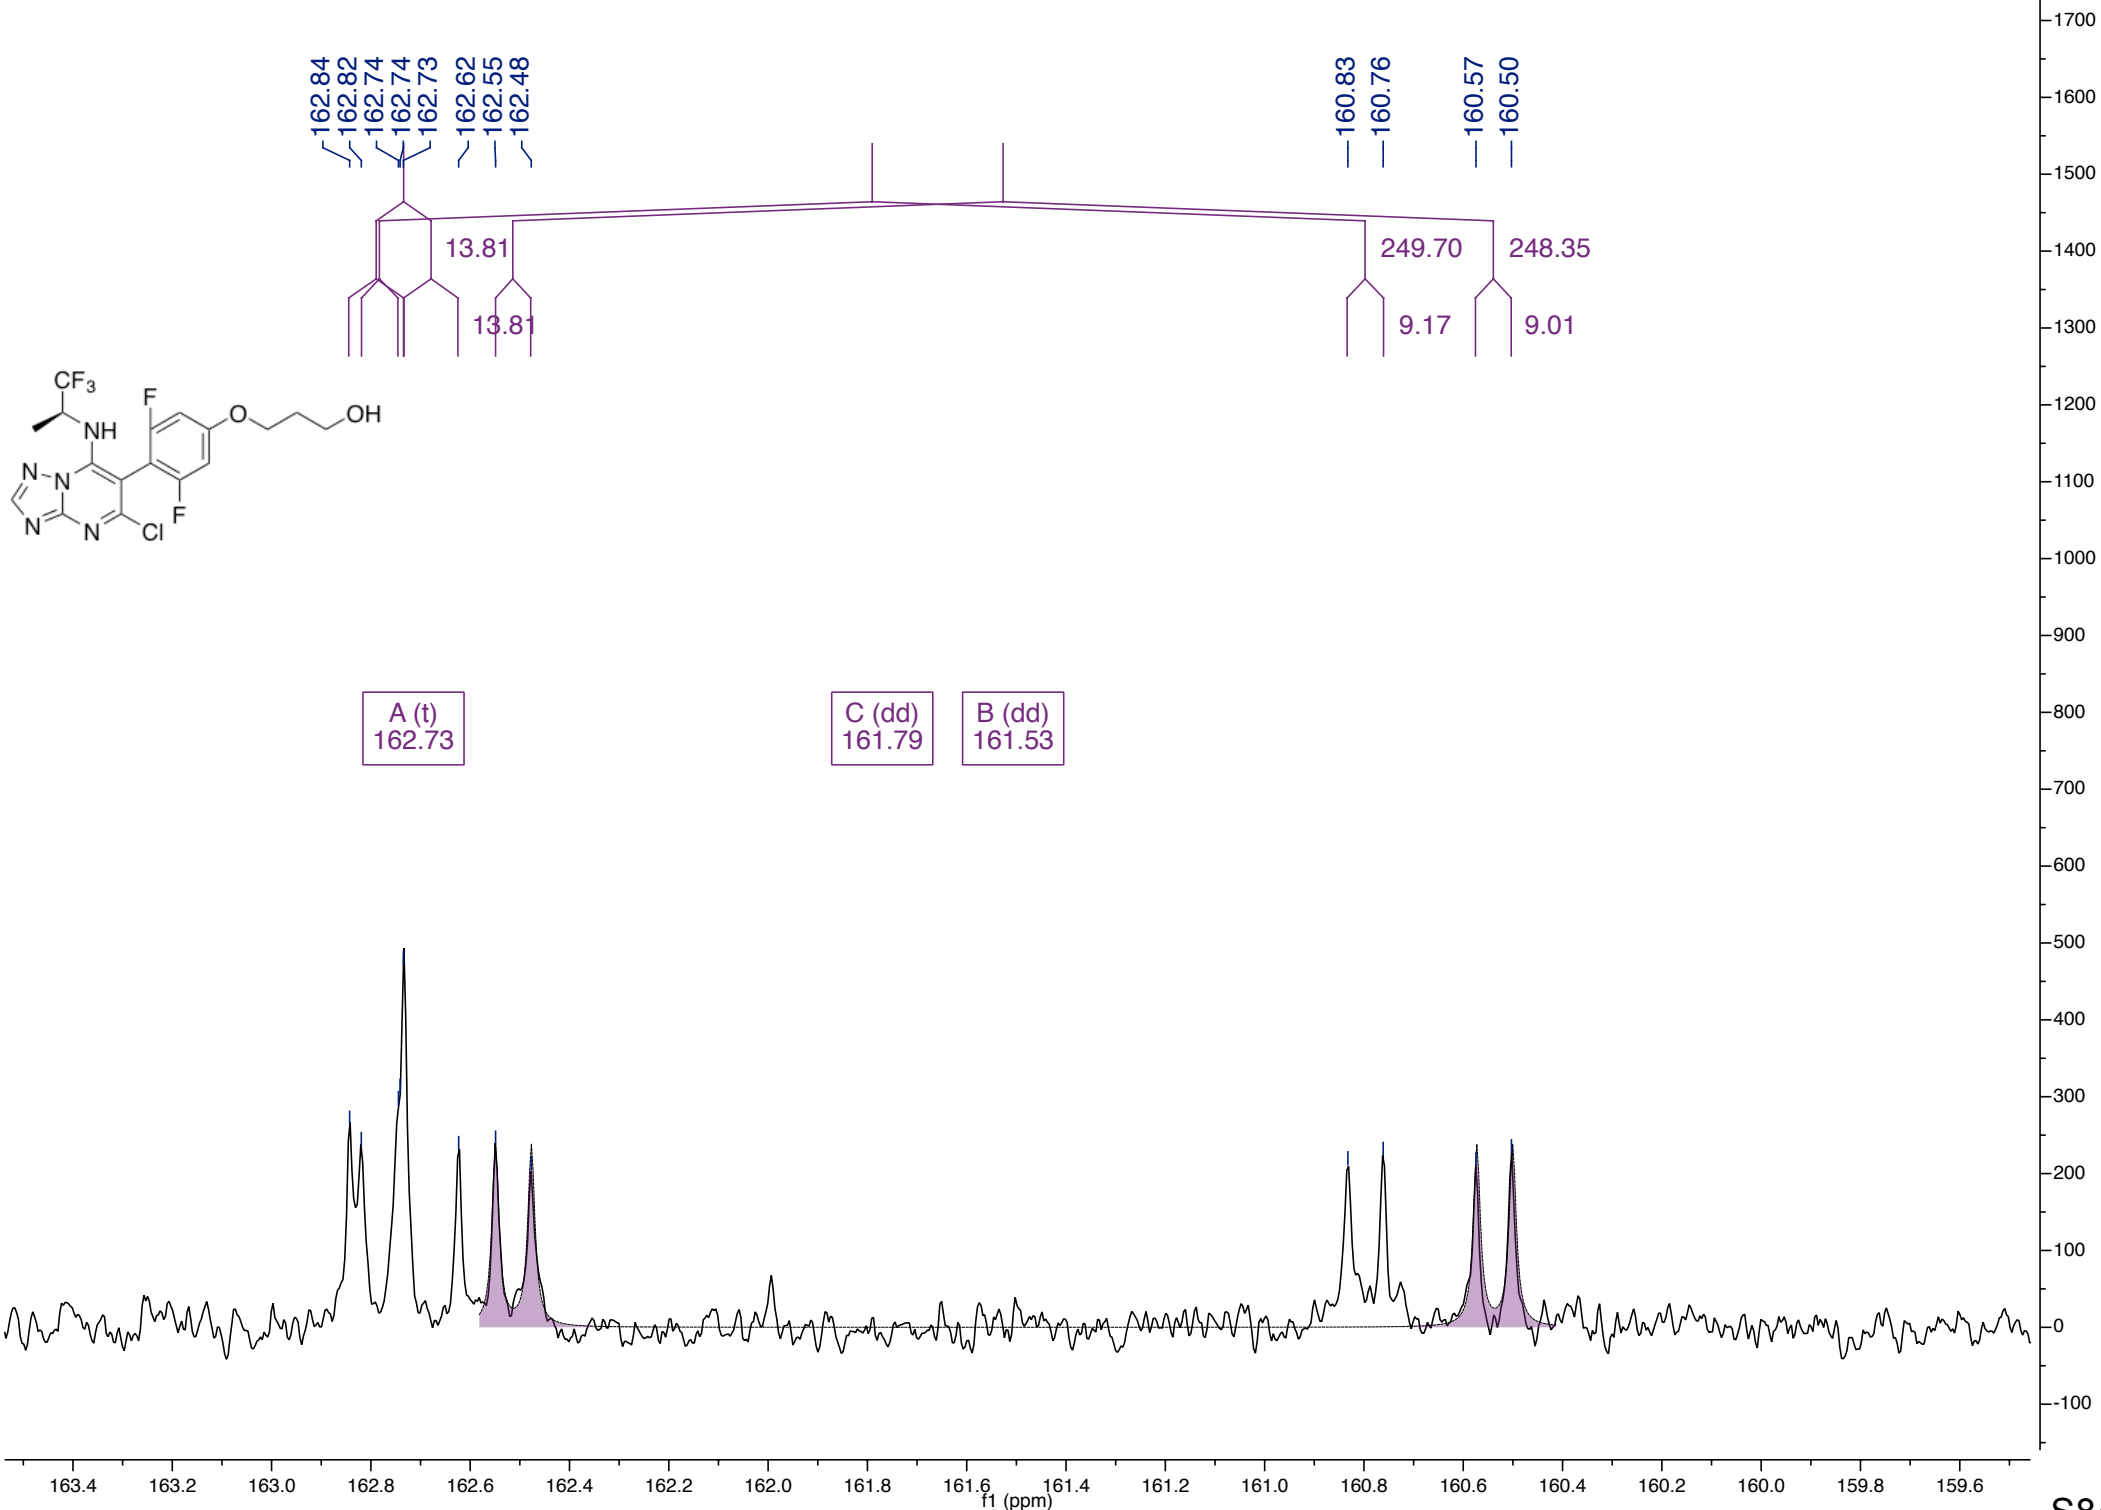

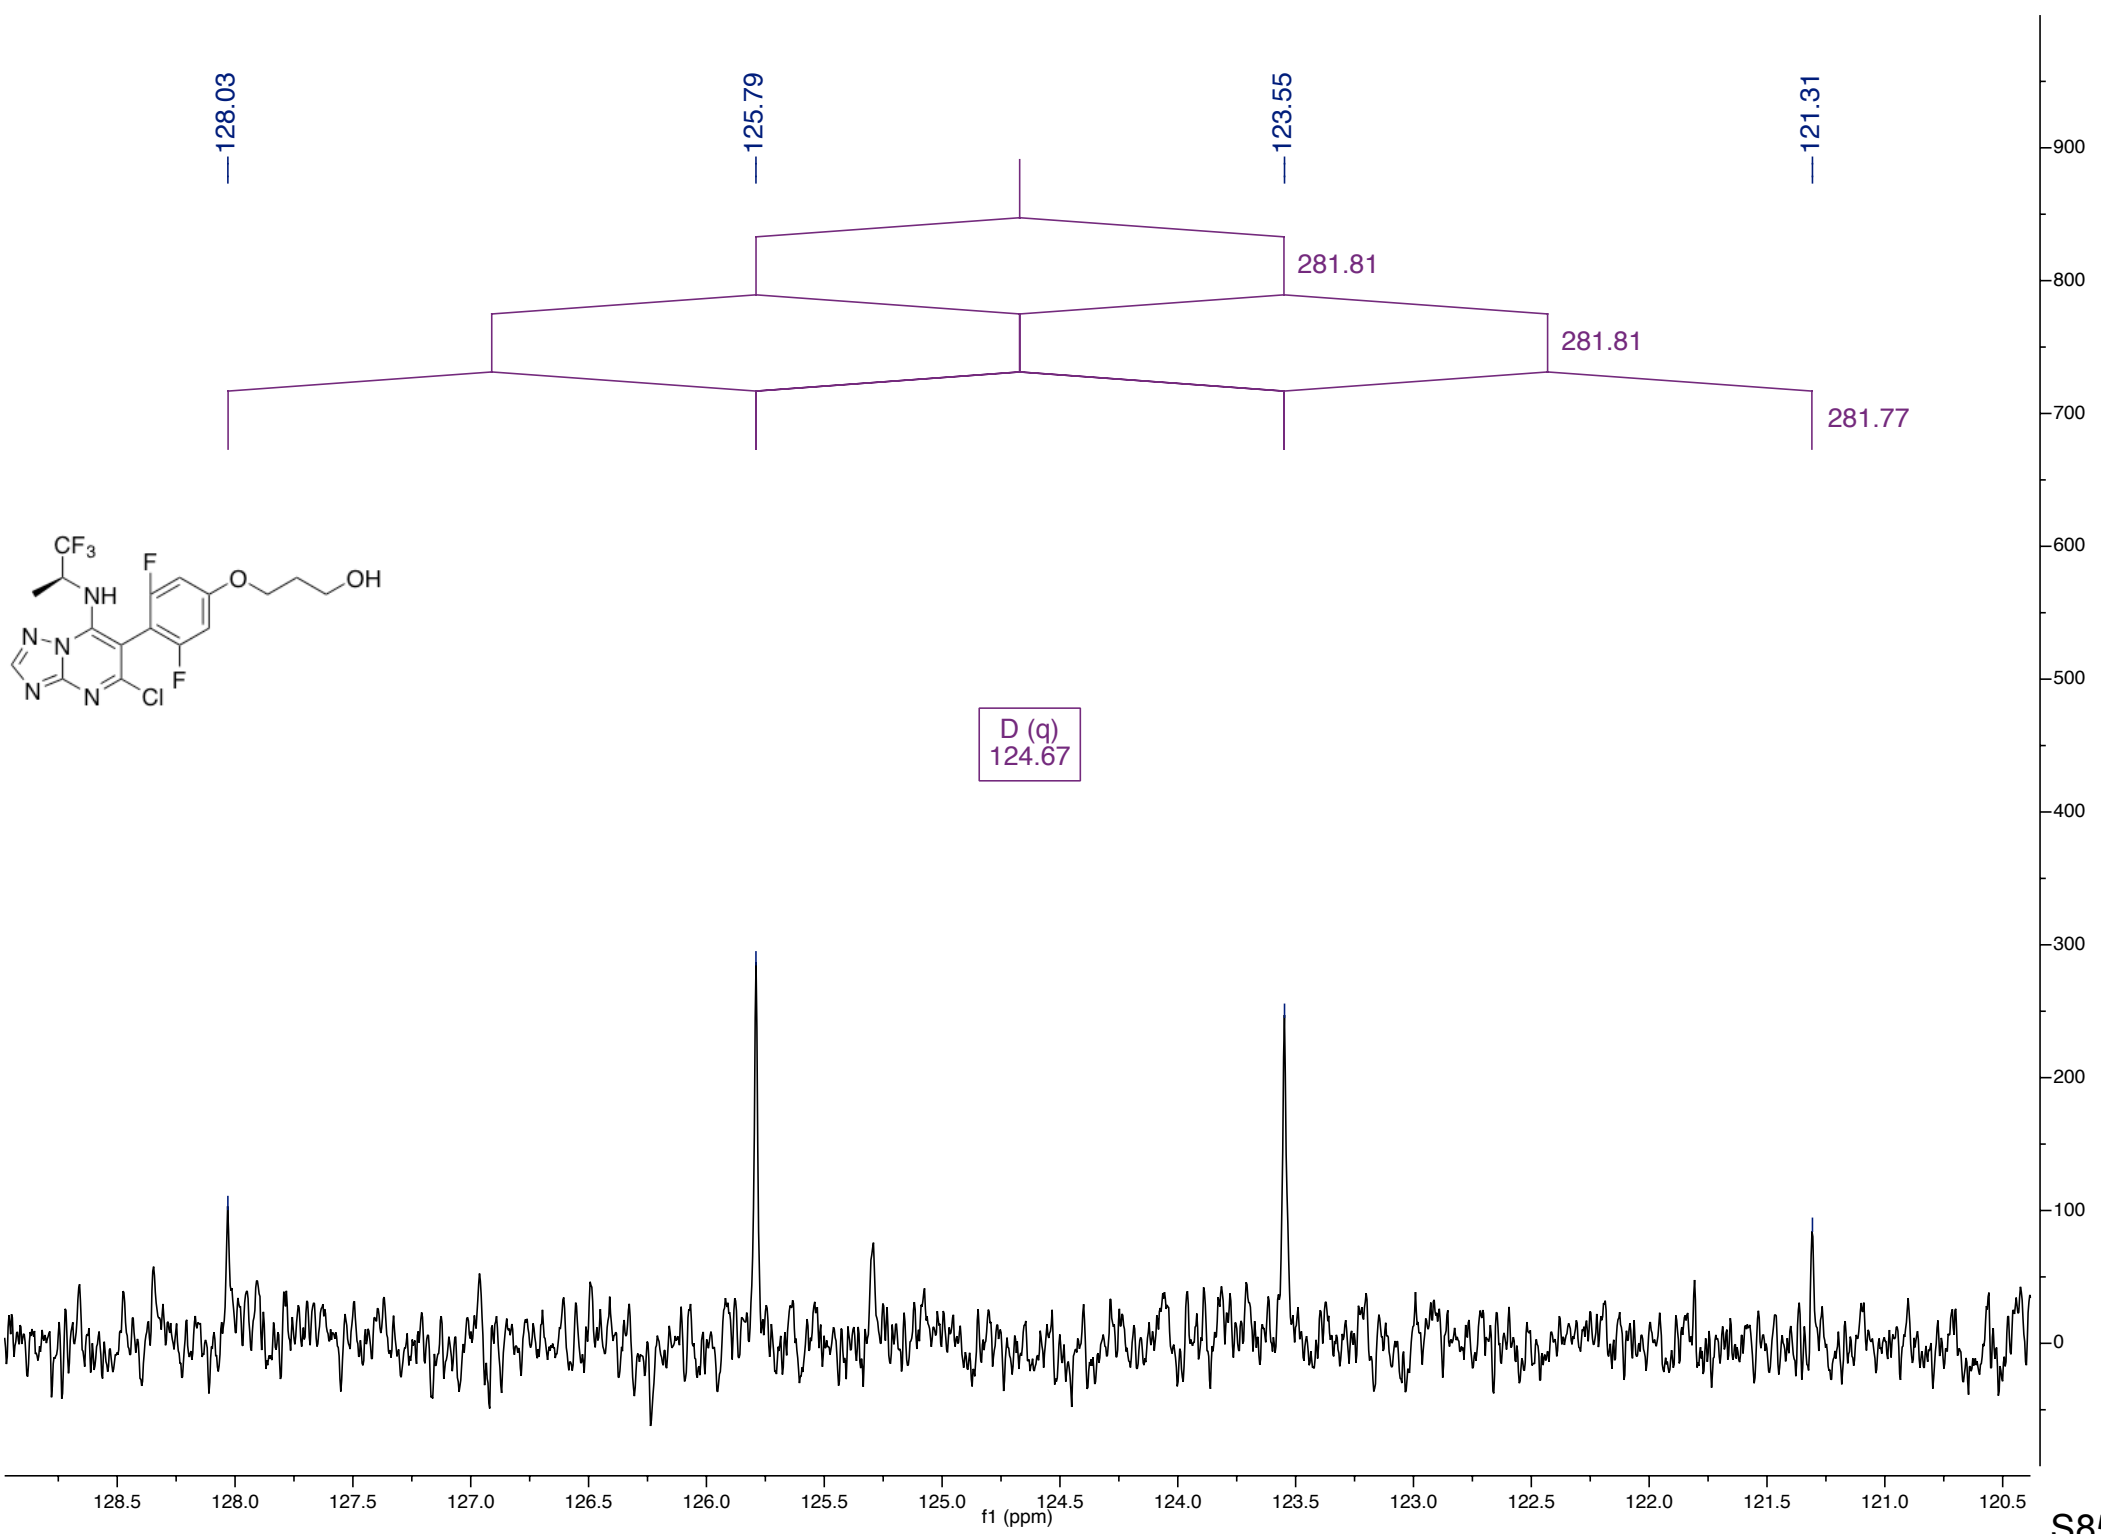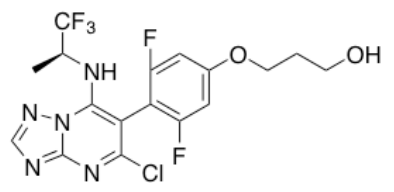

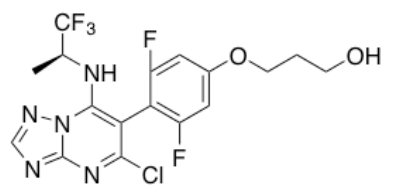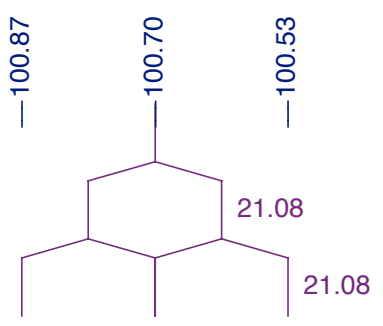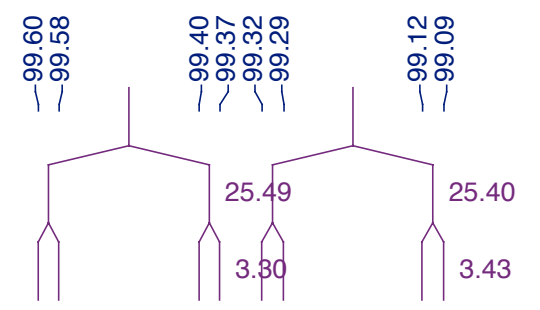

E (t)  
100.70

F (dd)  
99.49

G (dd)  
99.21

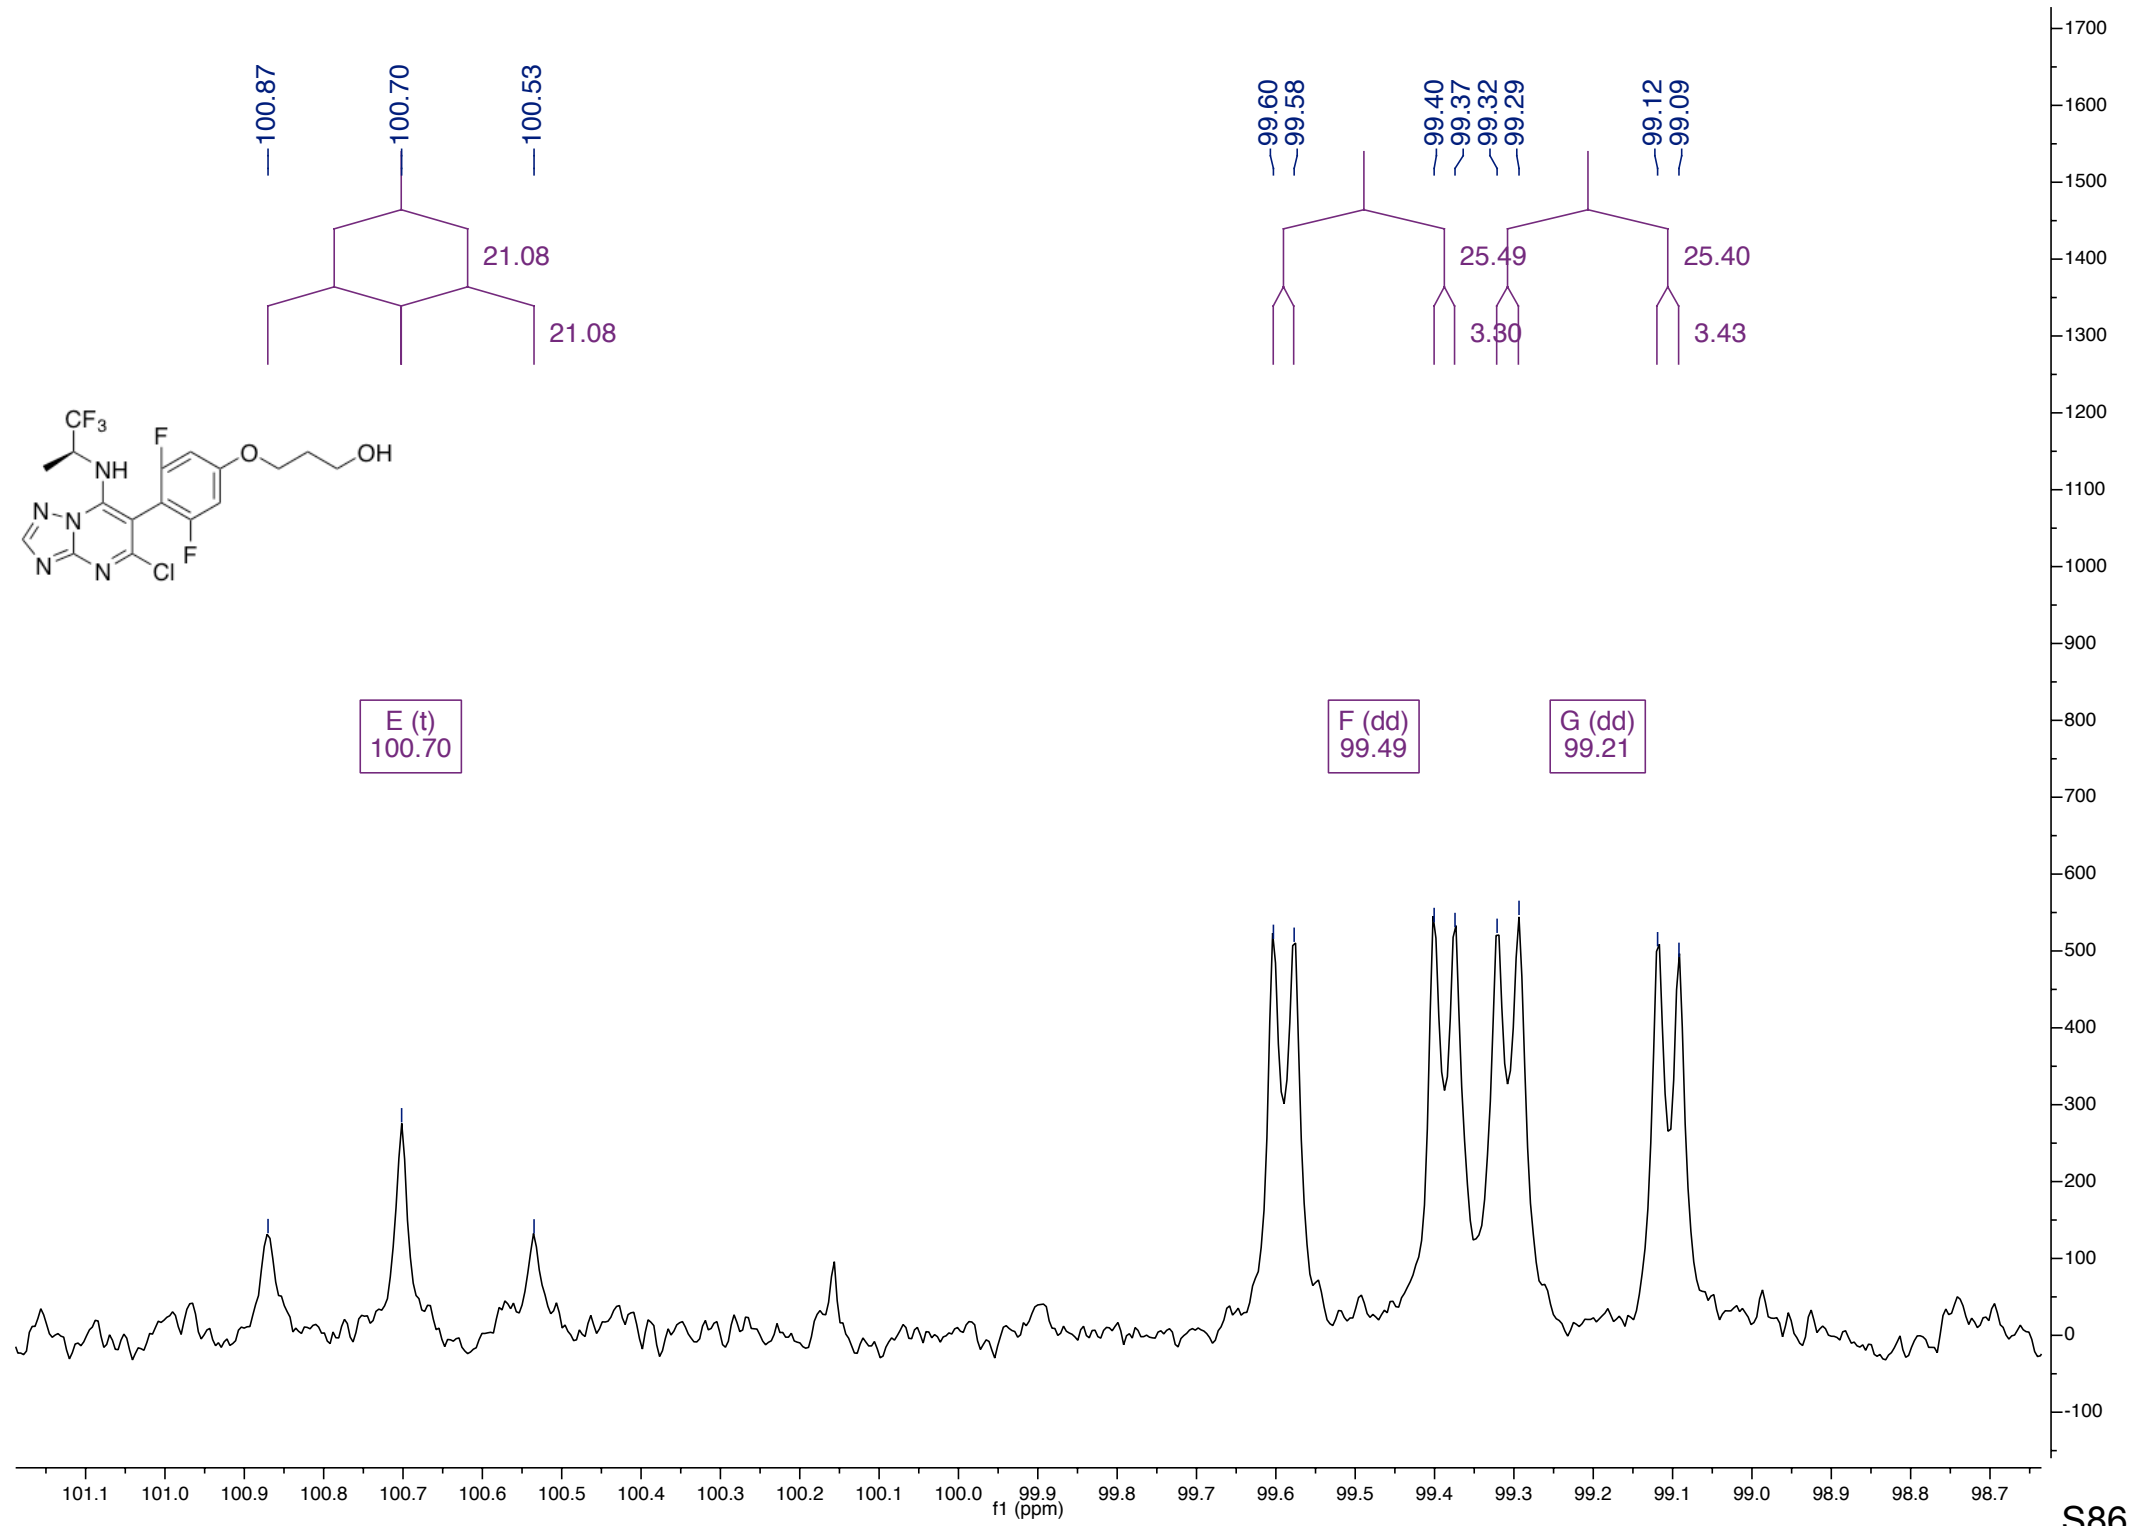

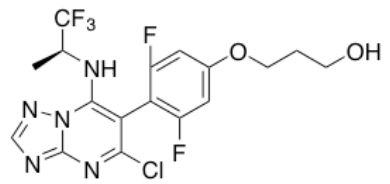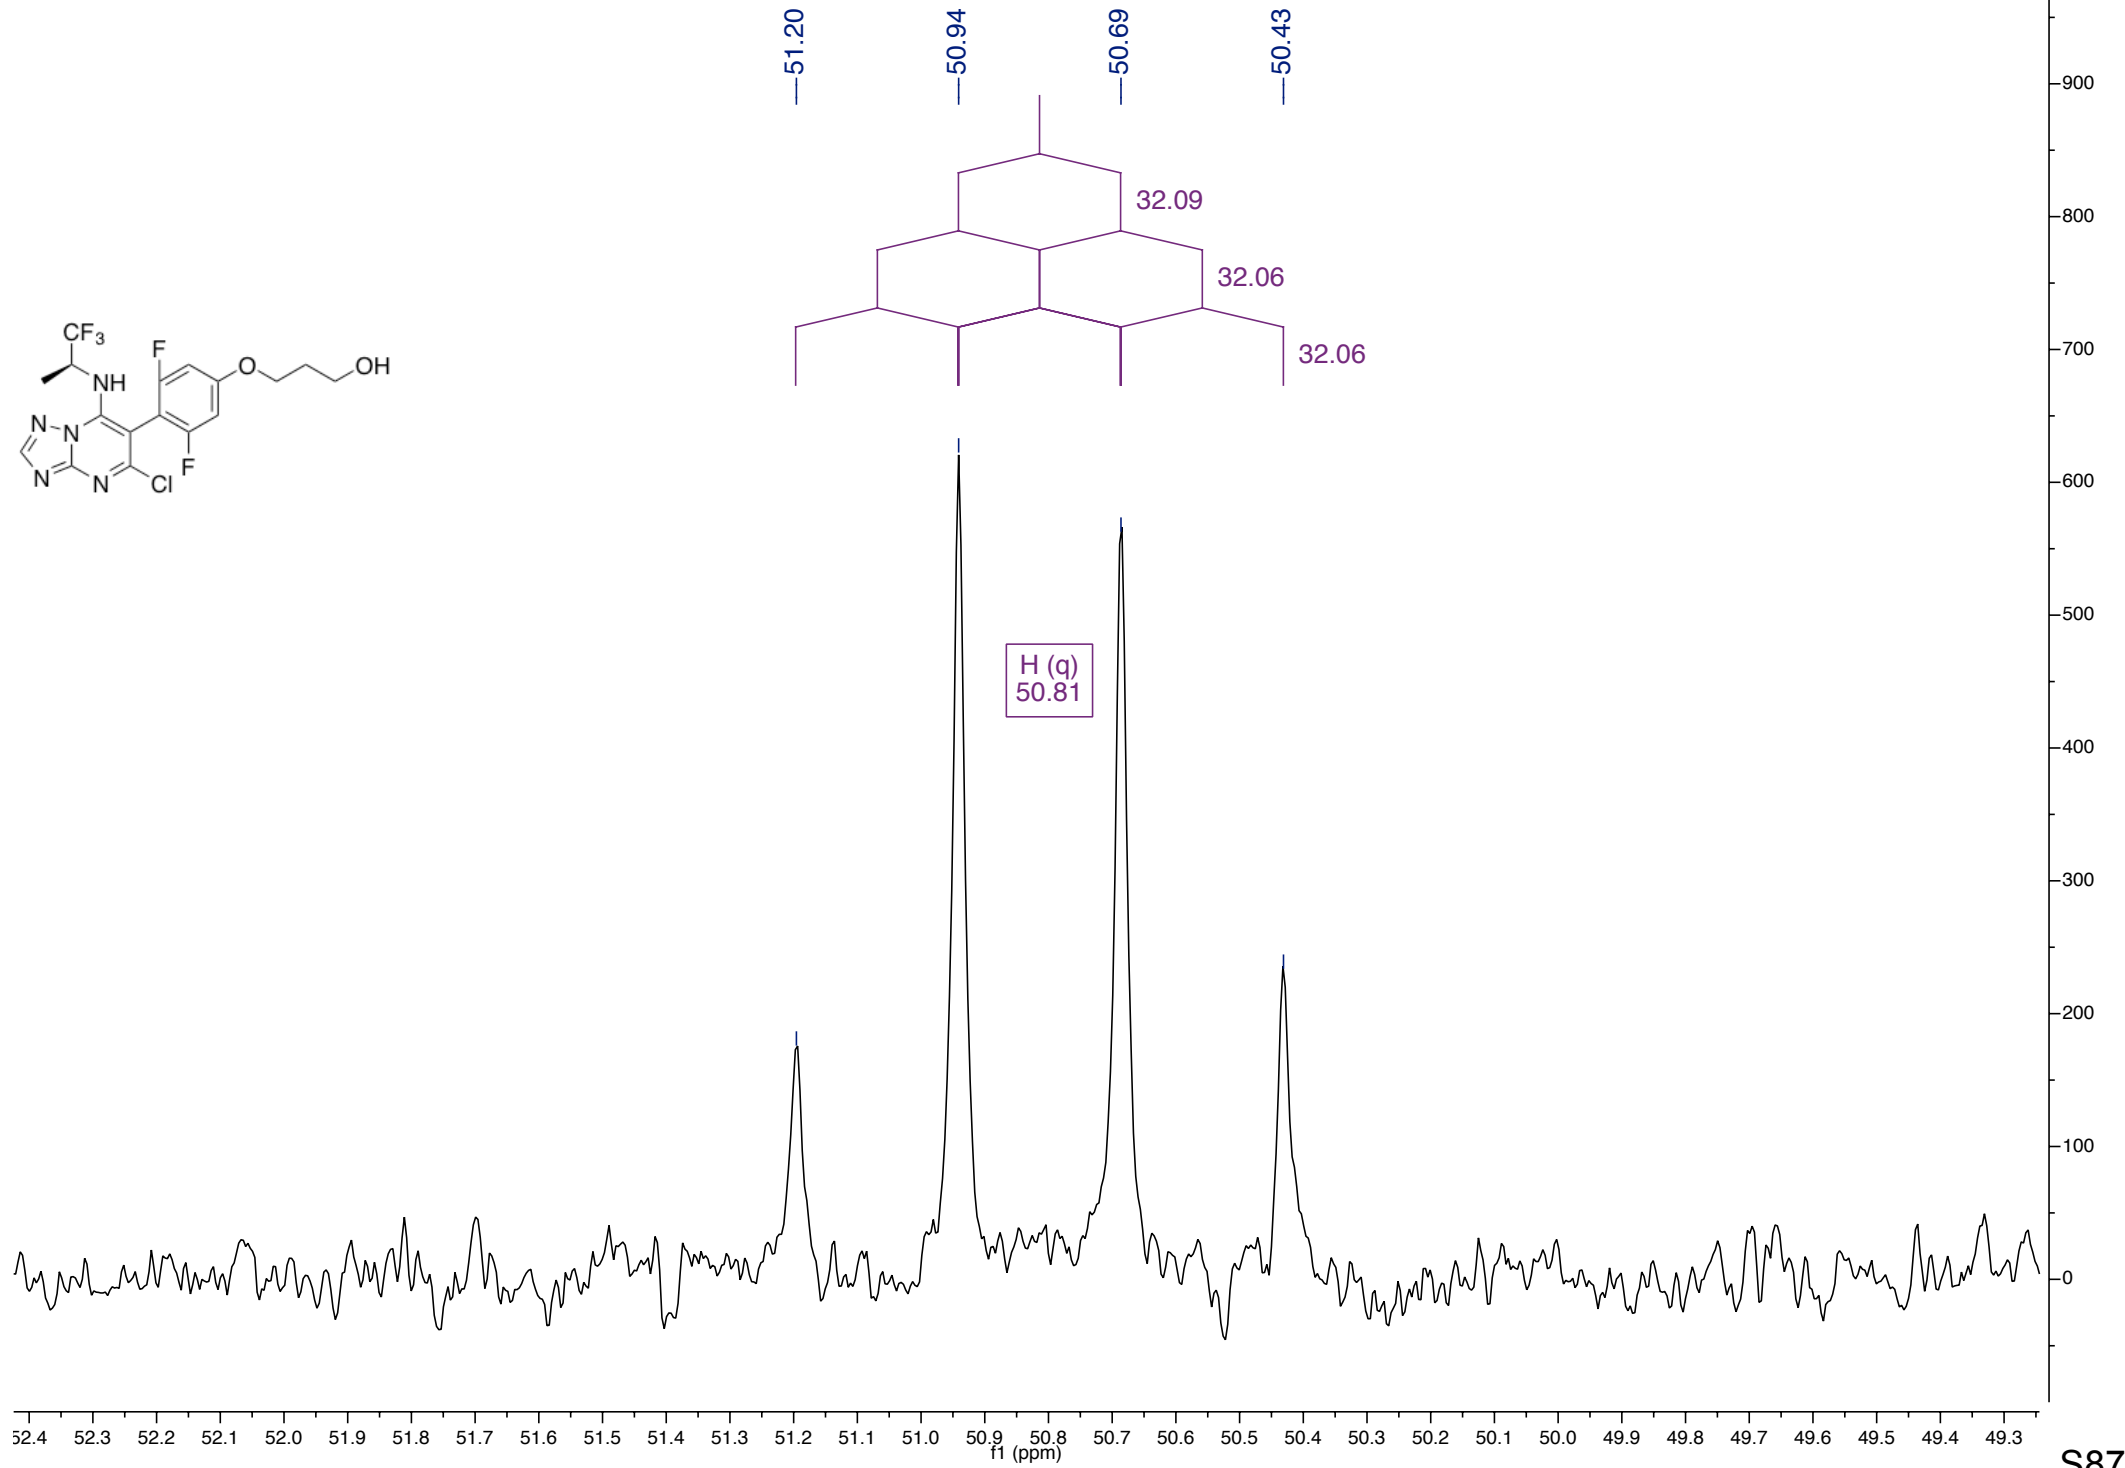

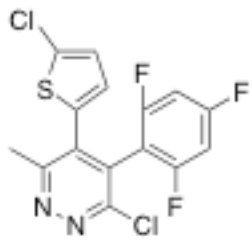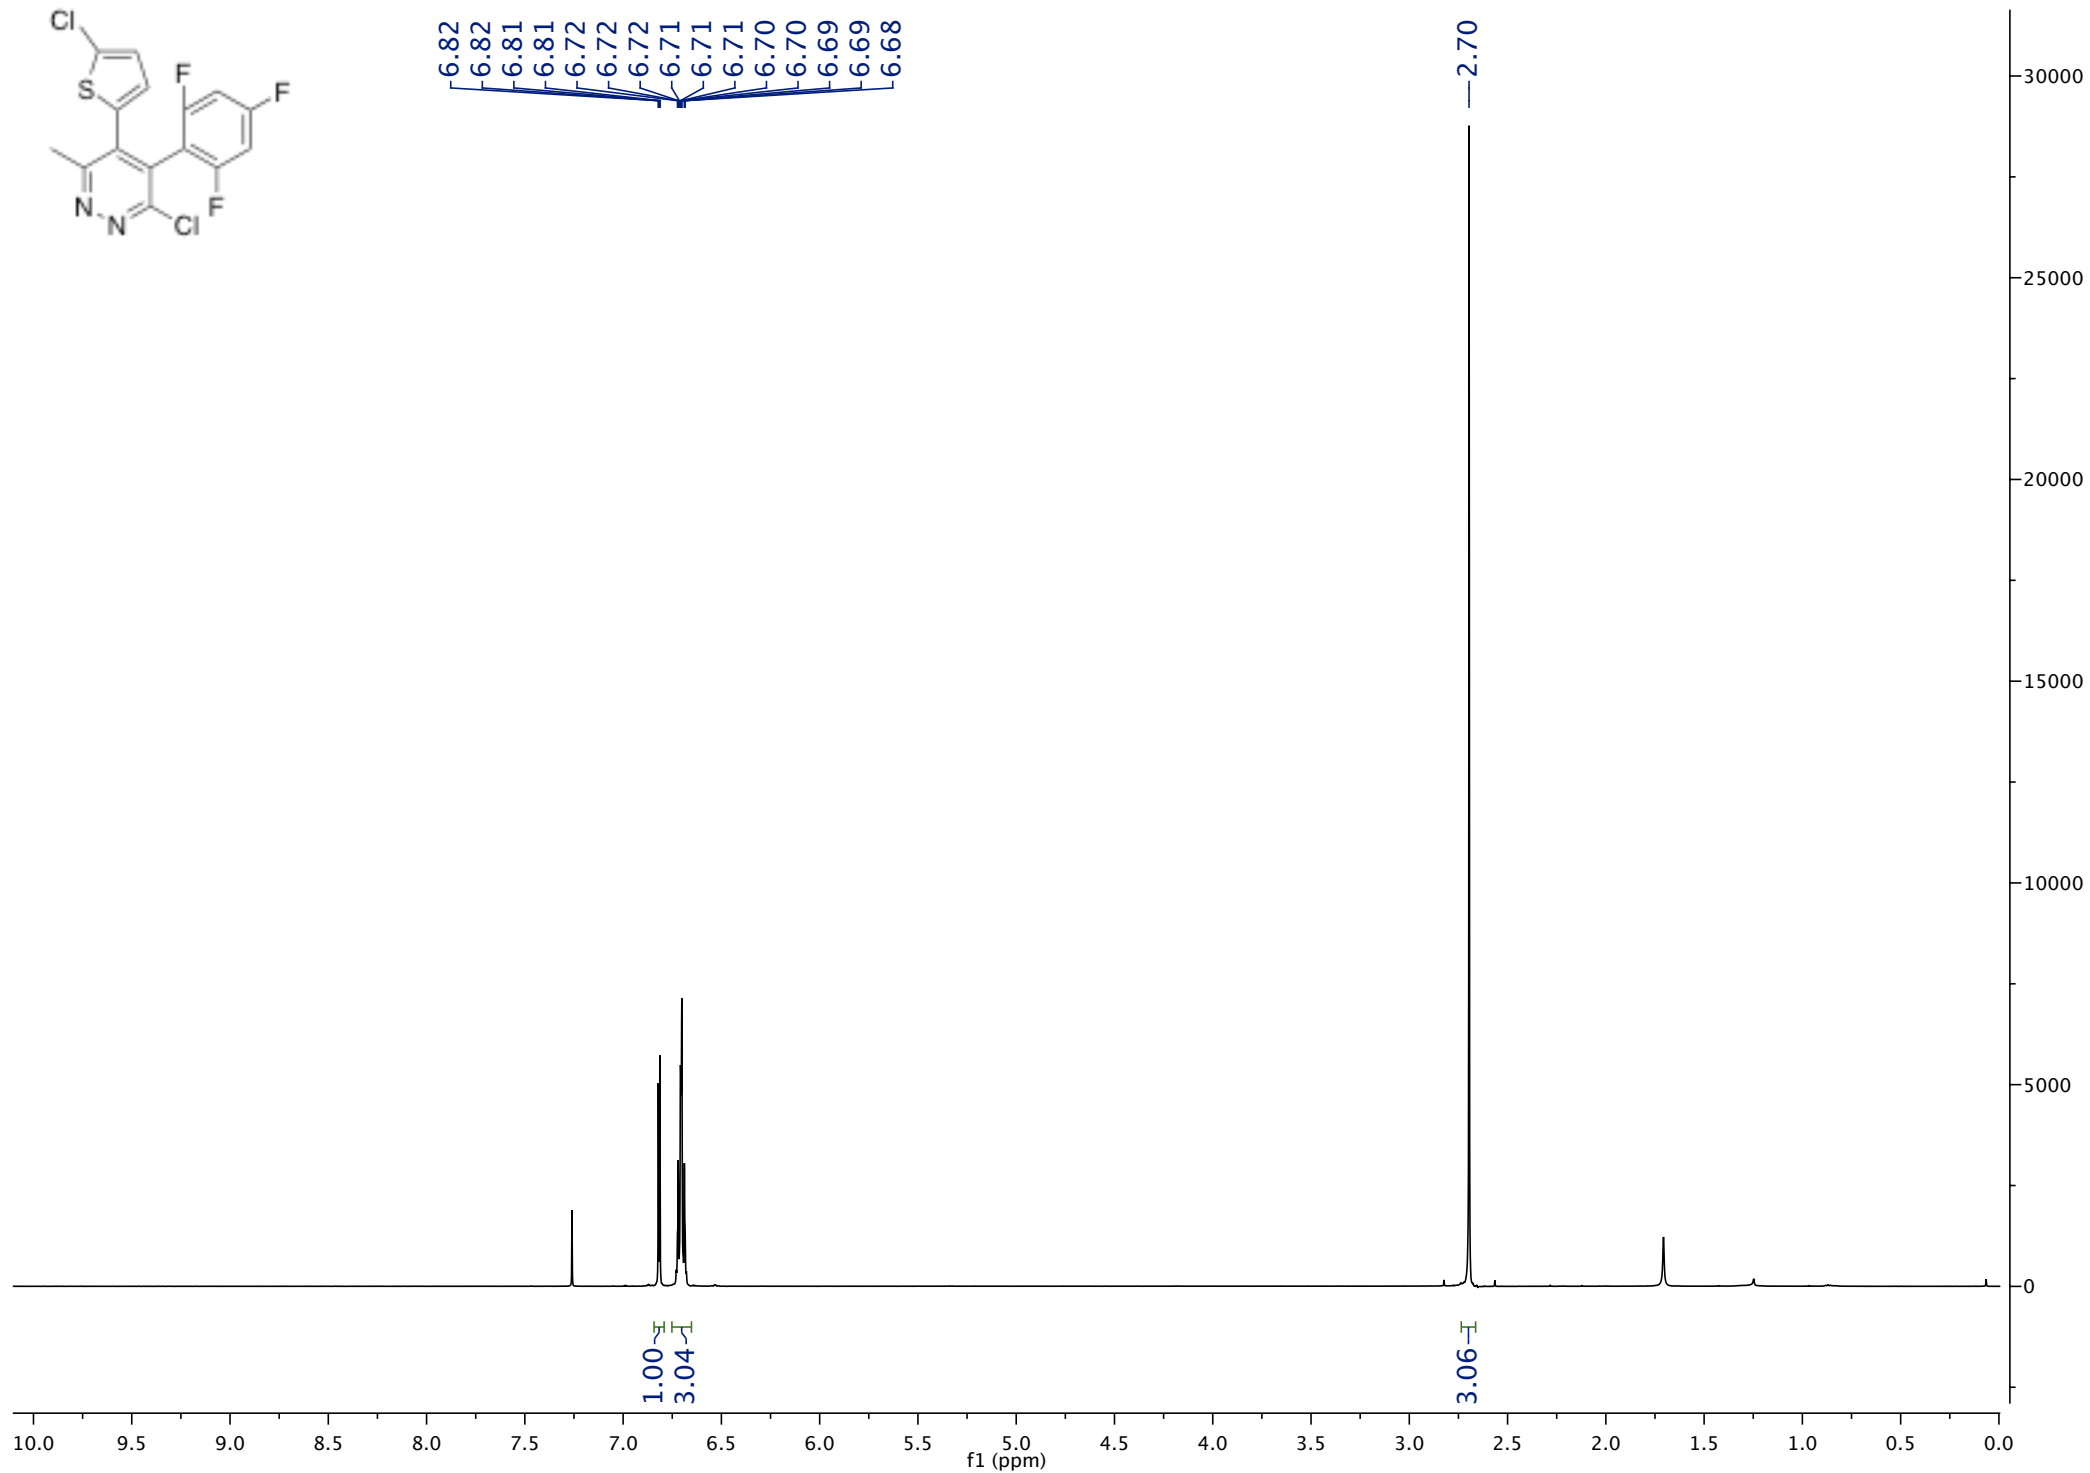



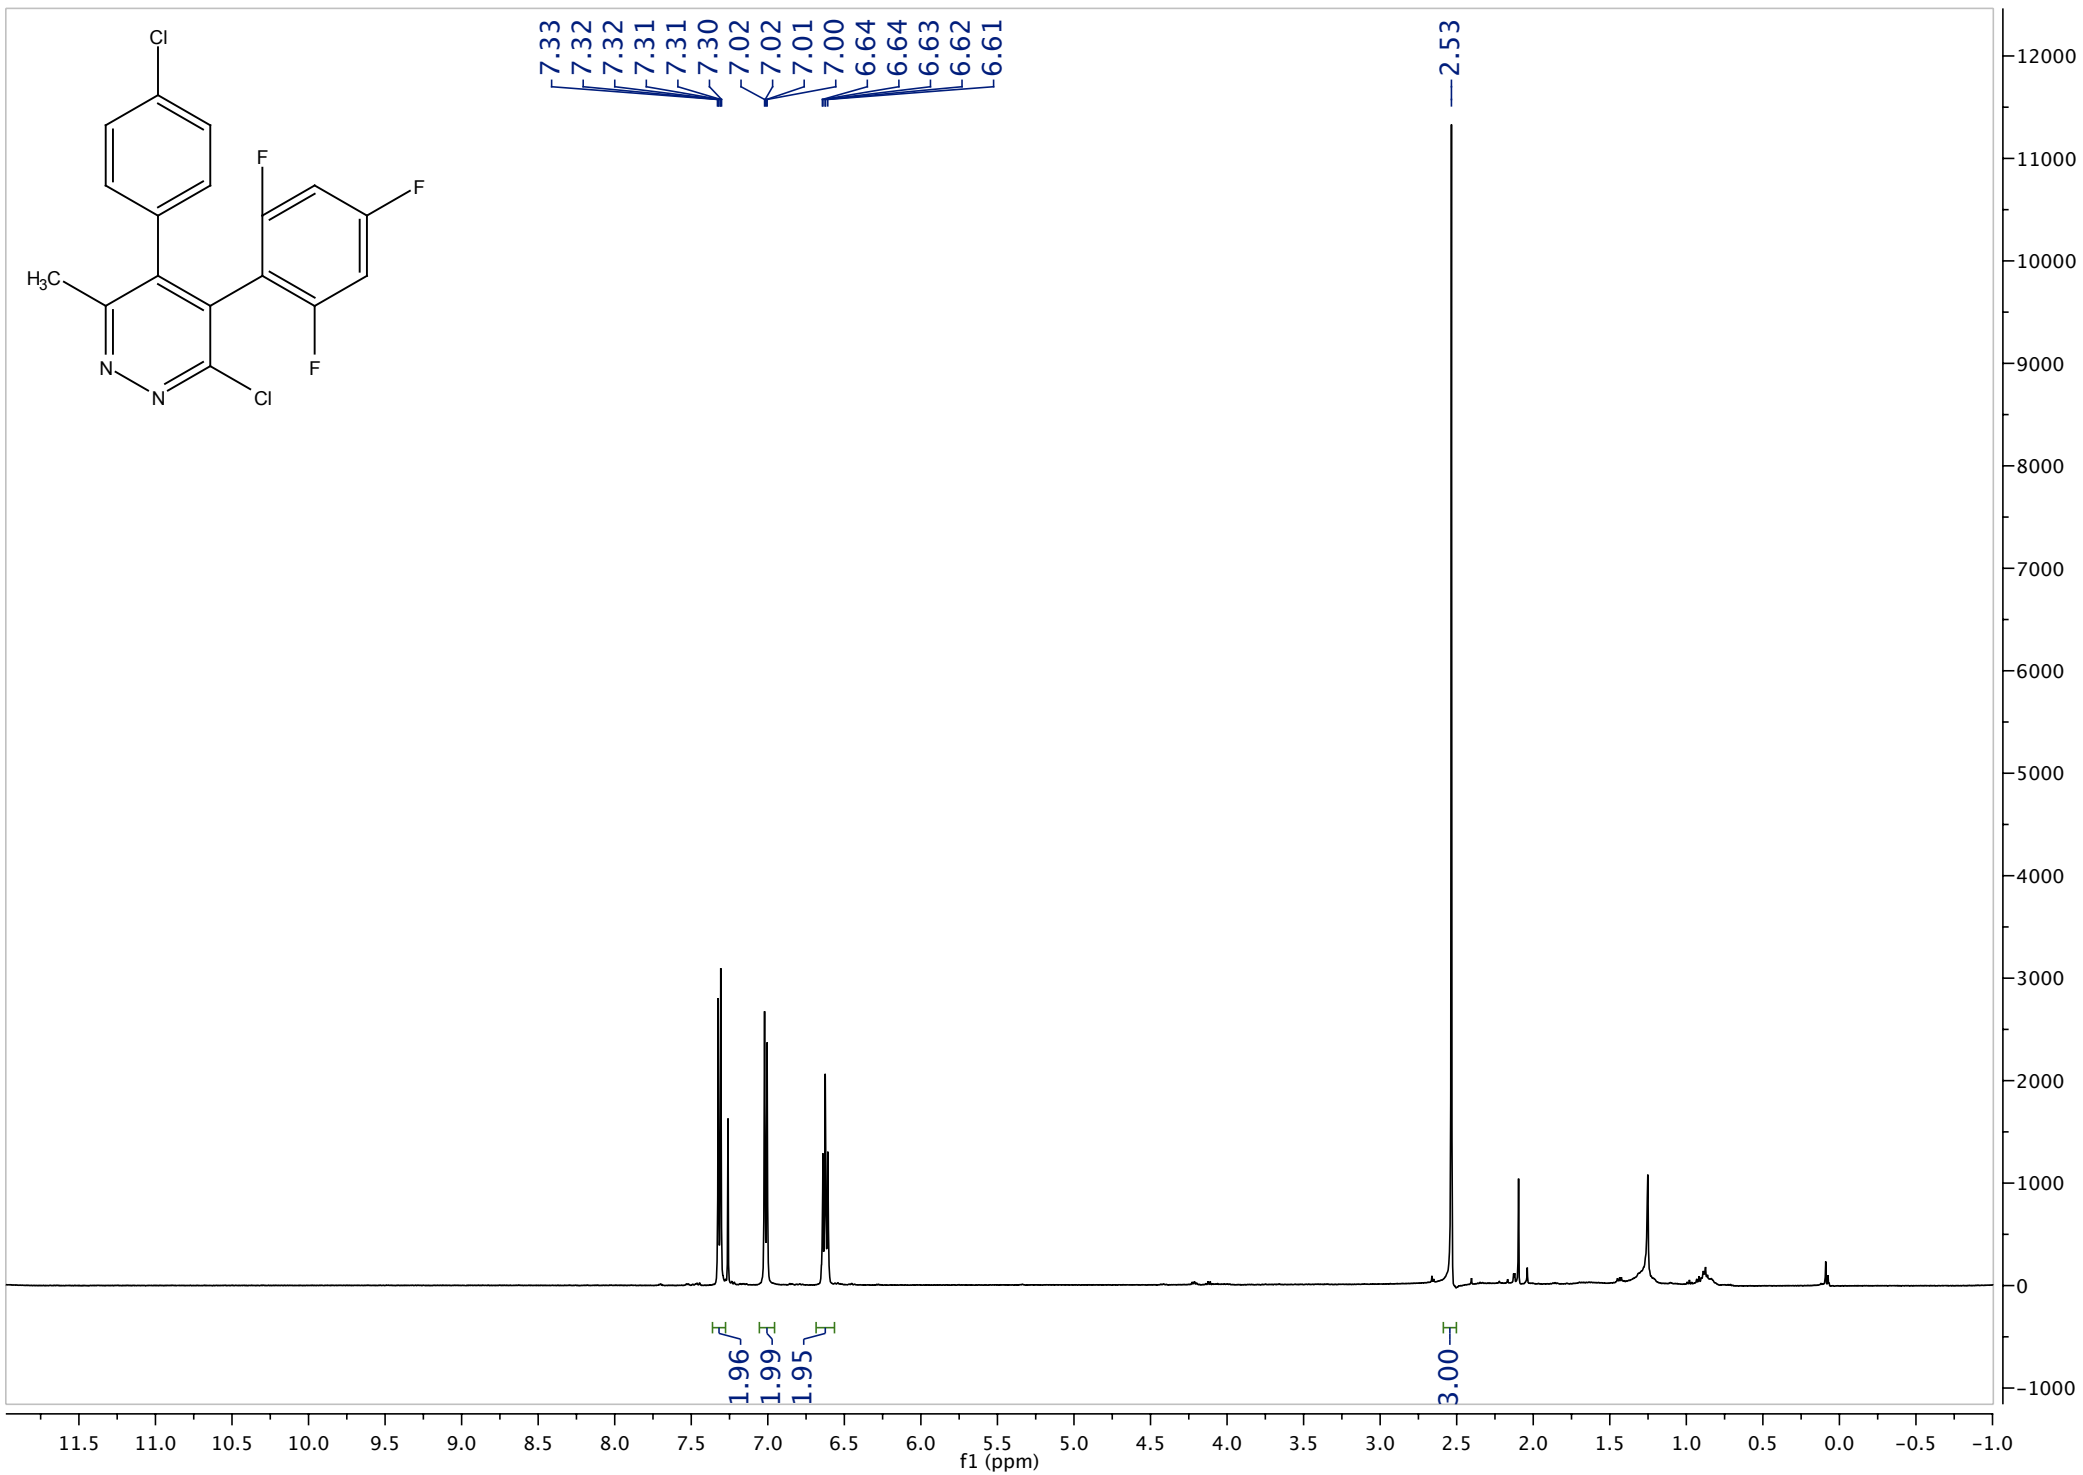

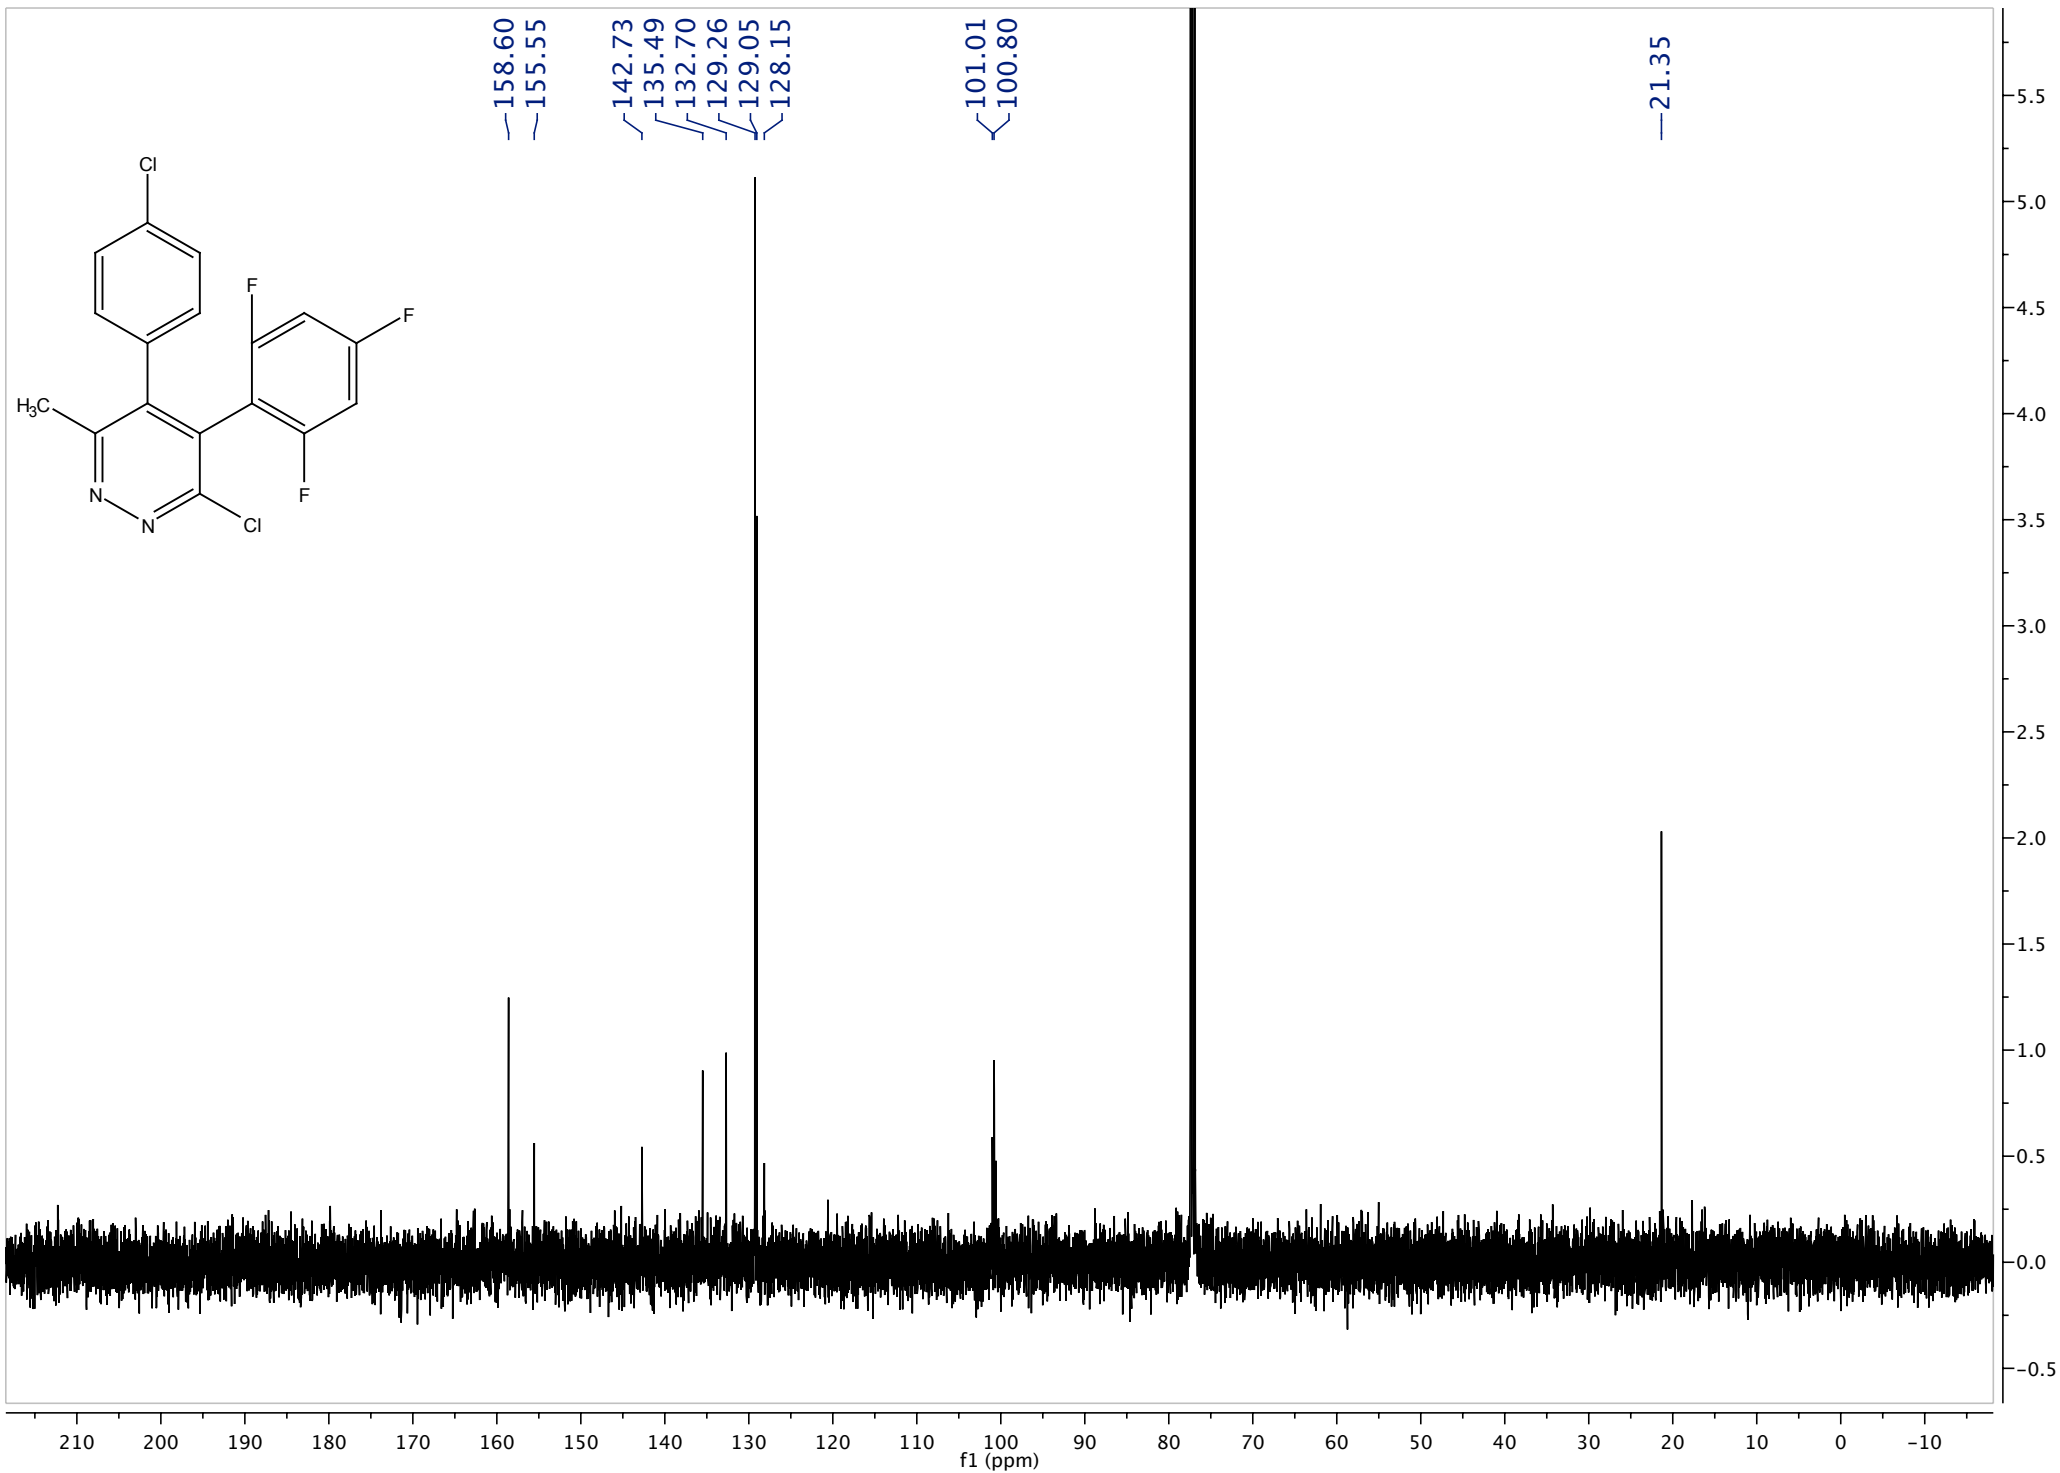

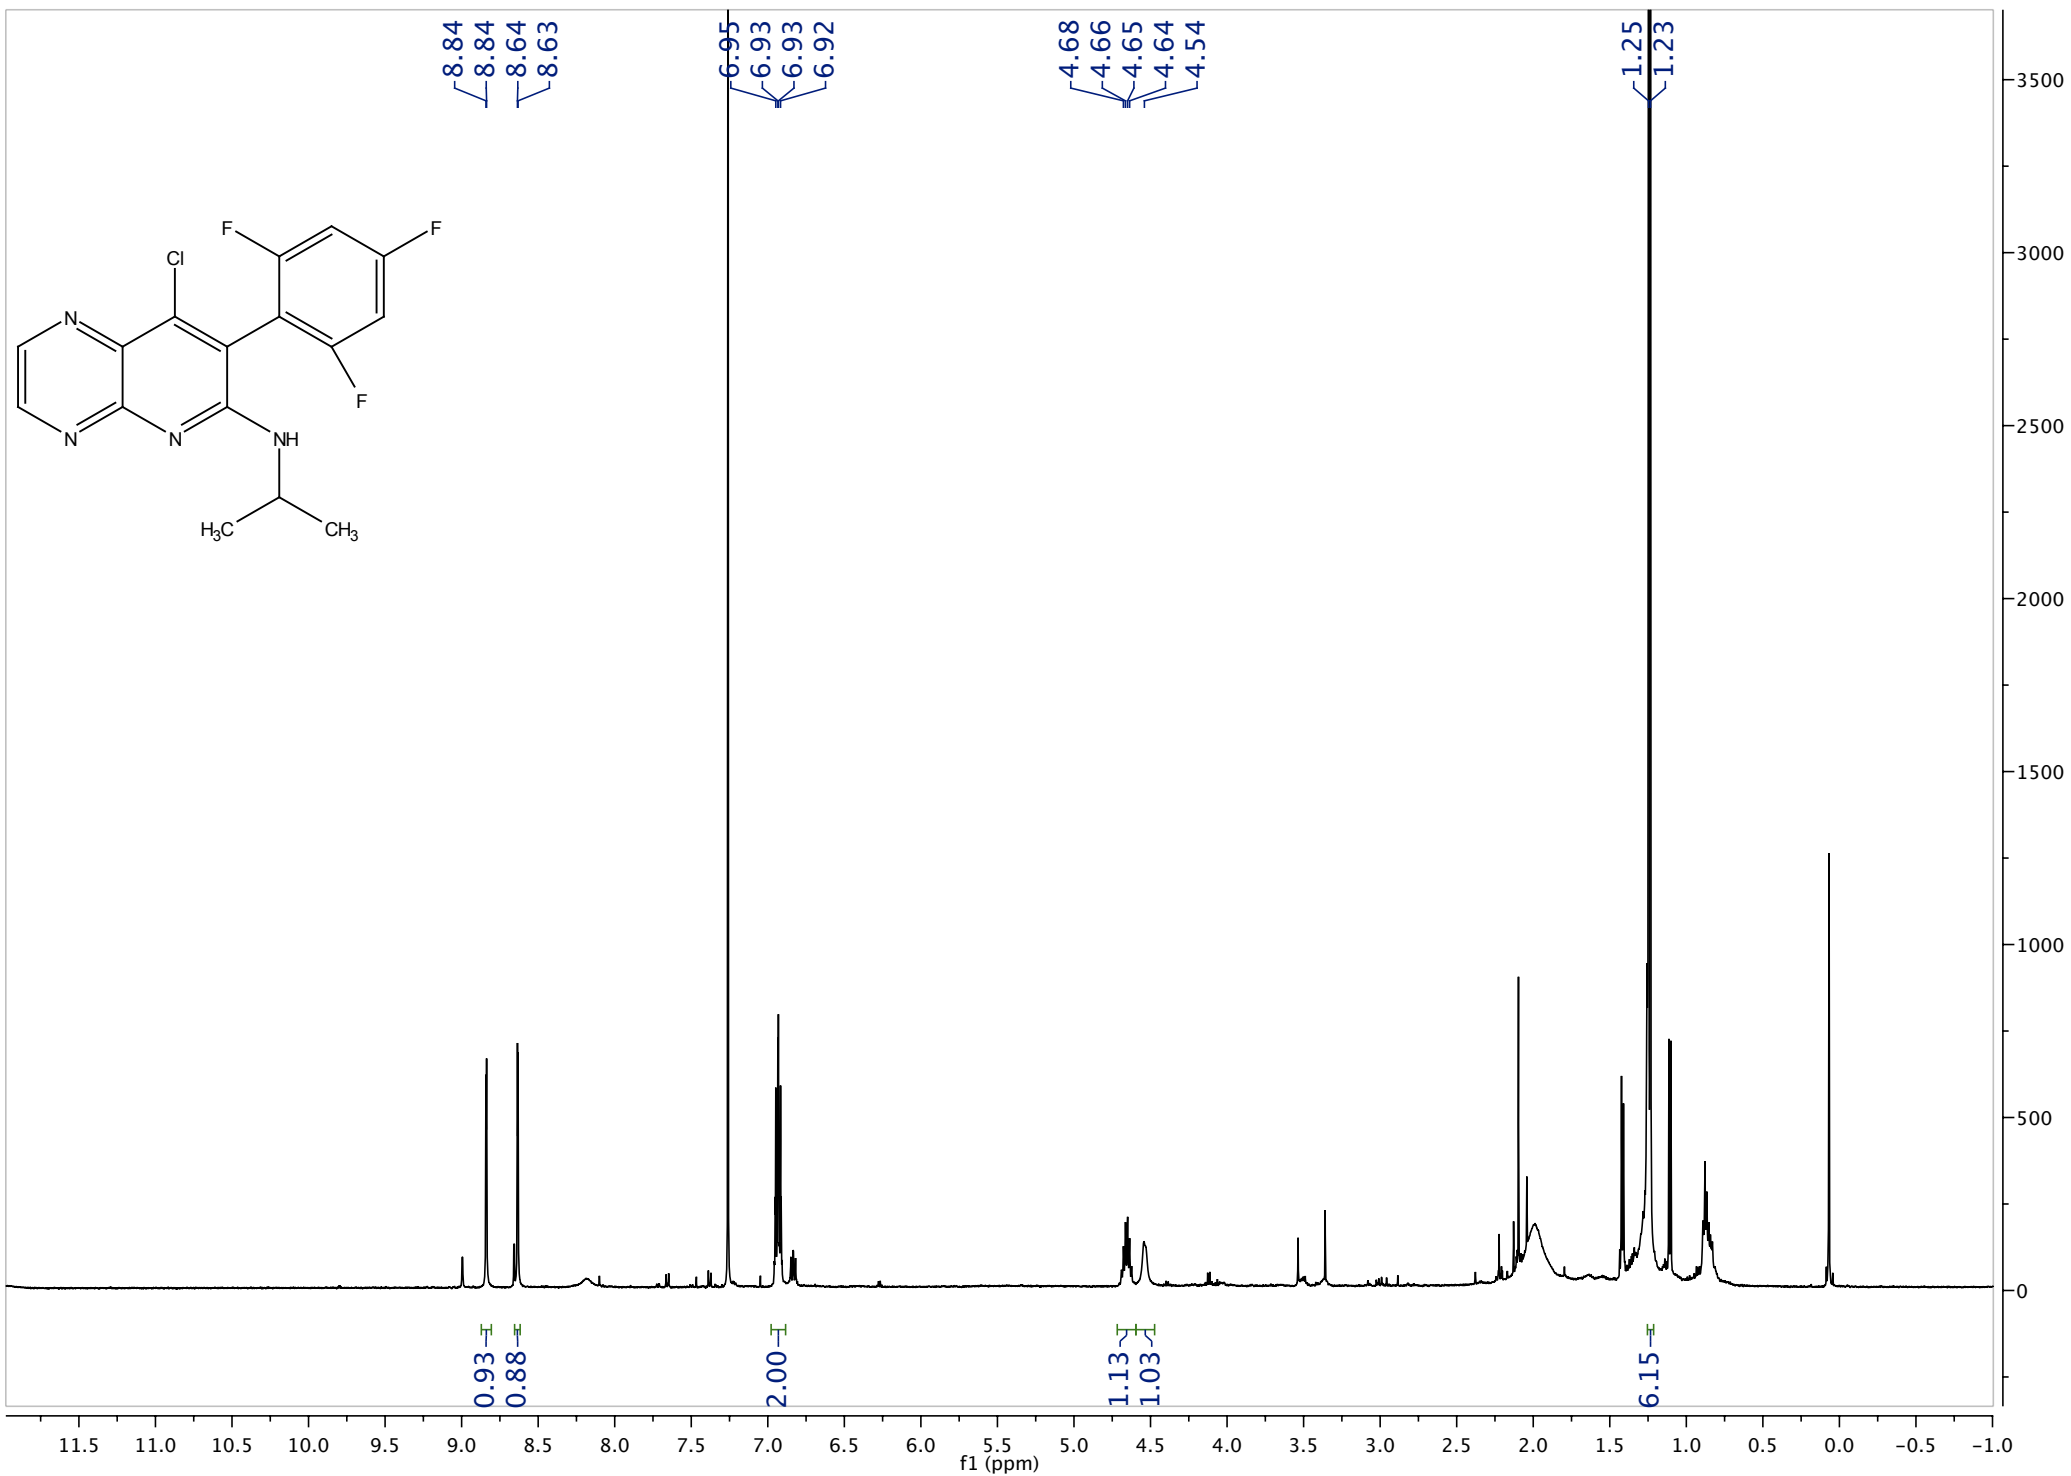

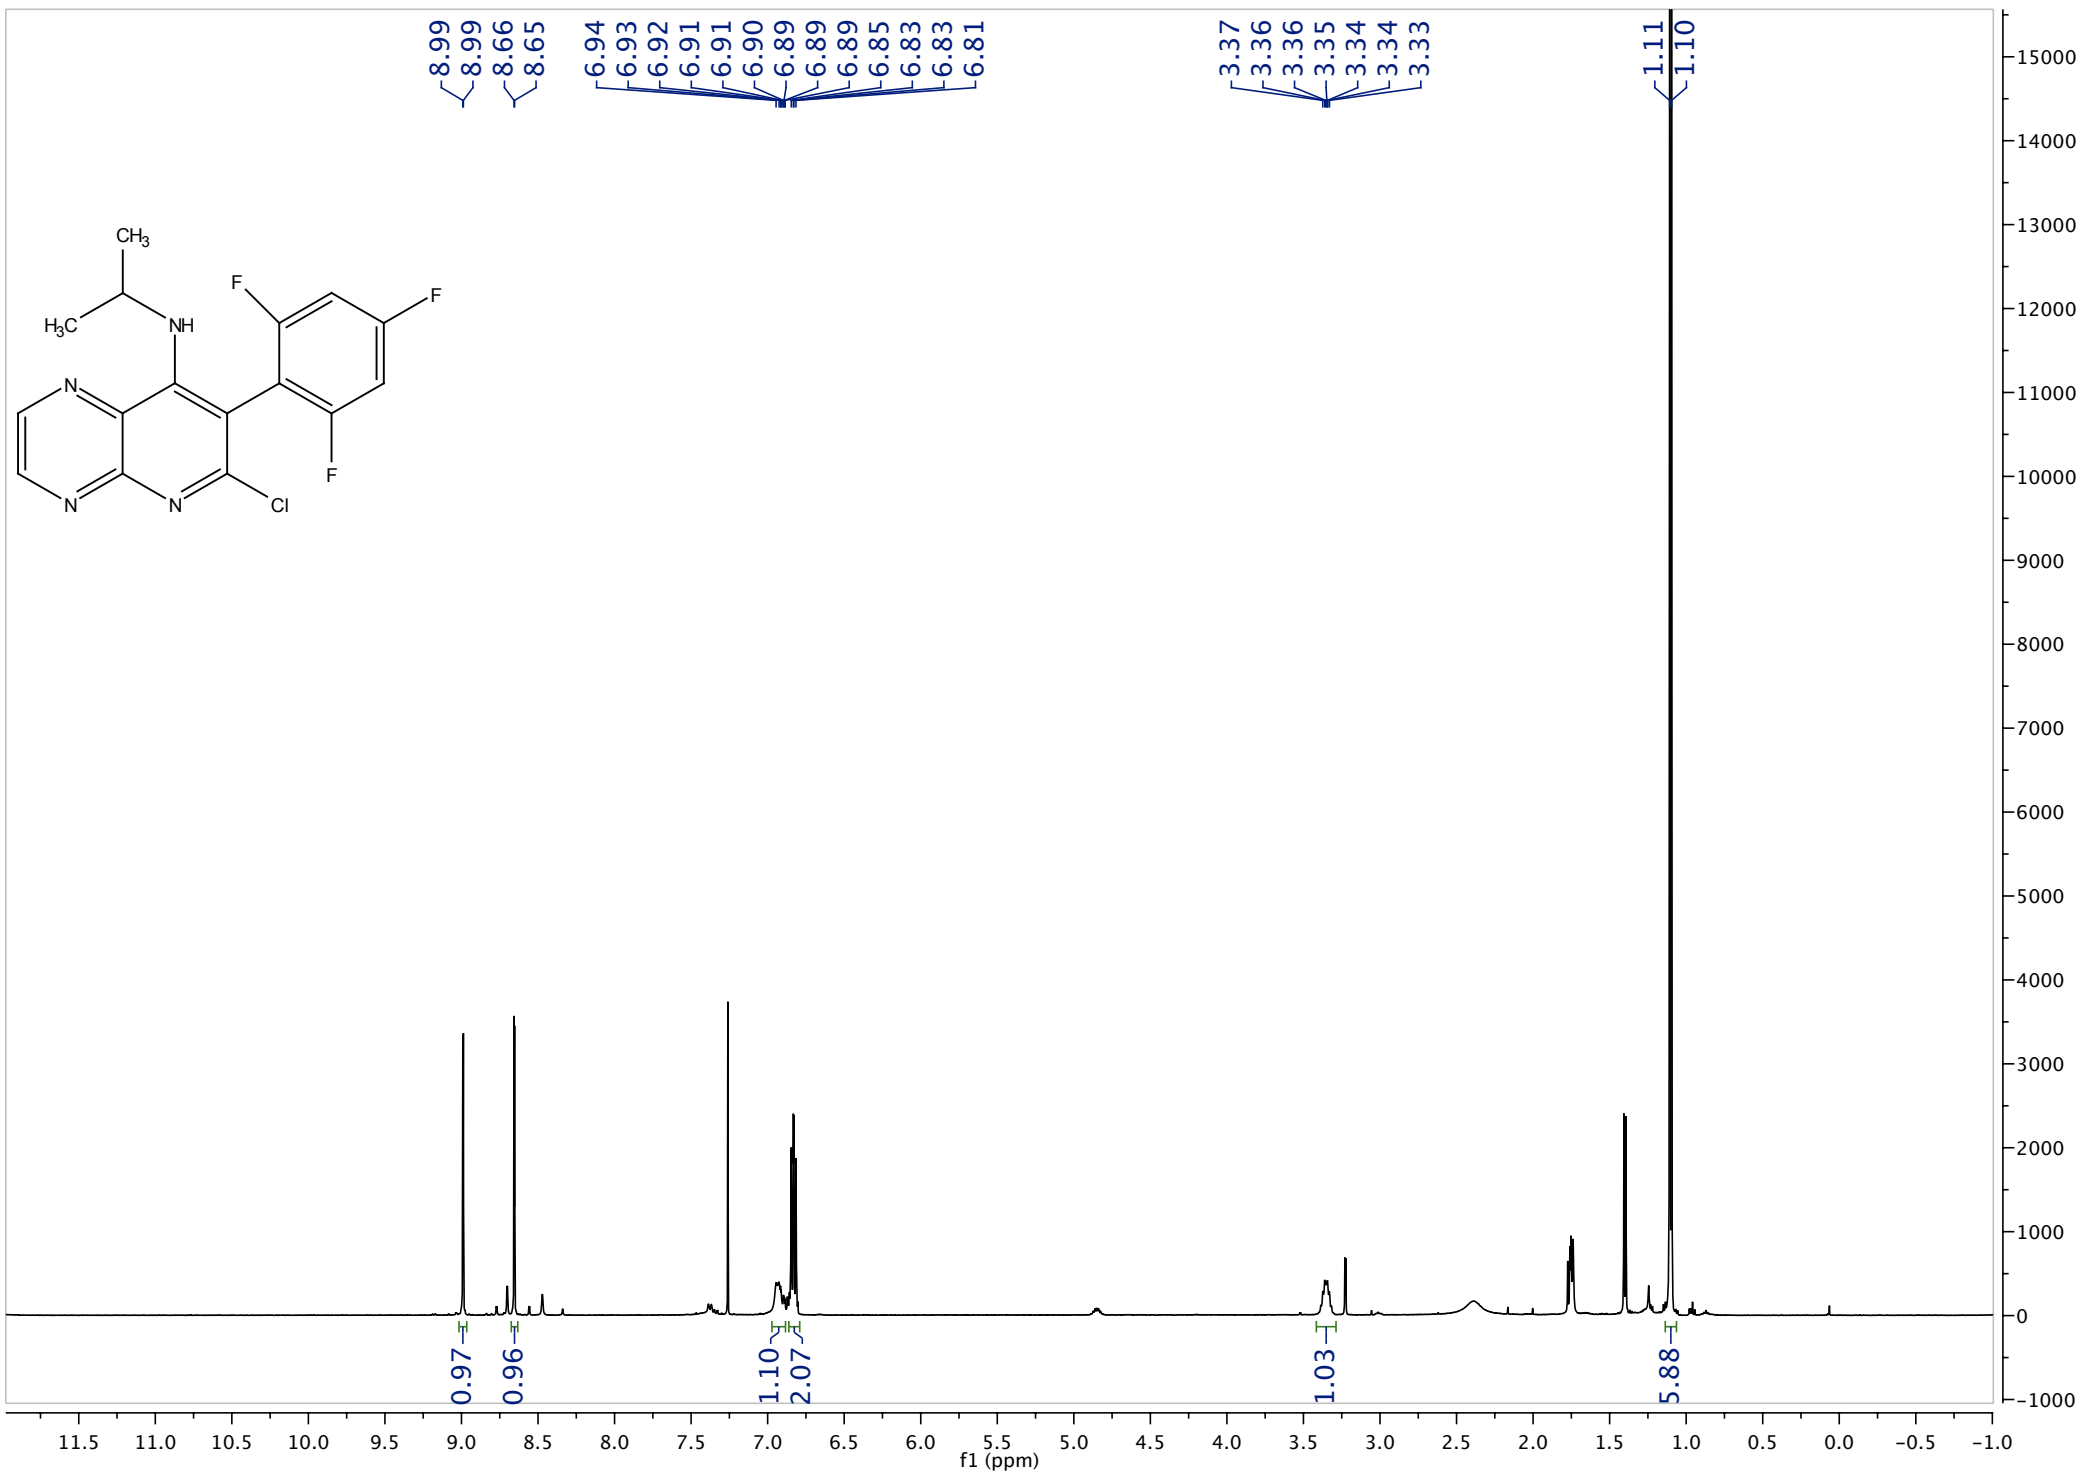

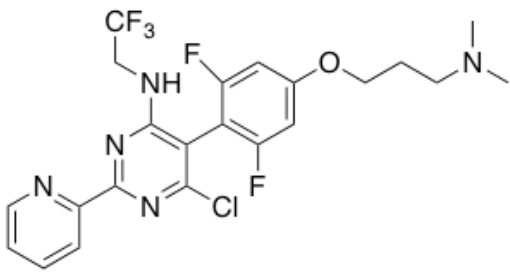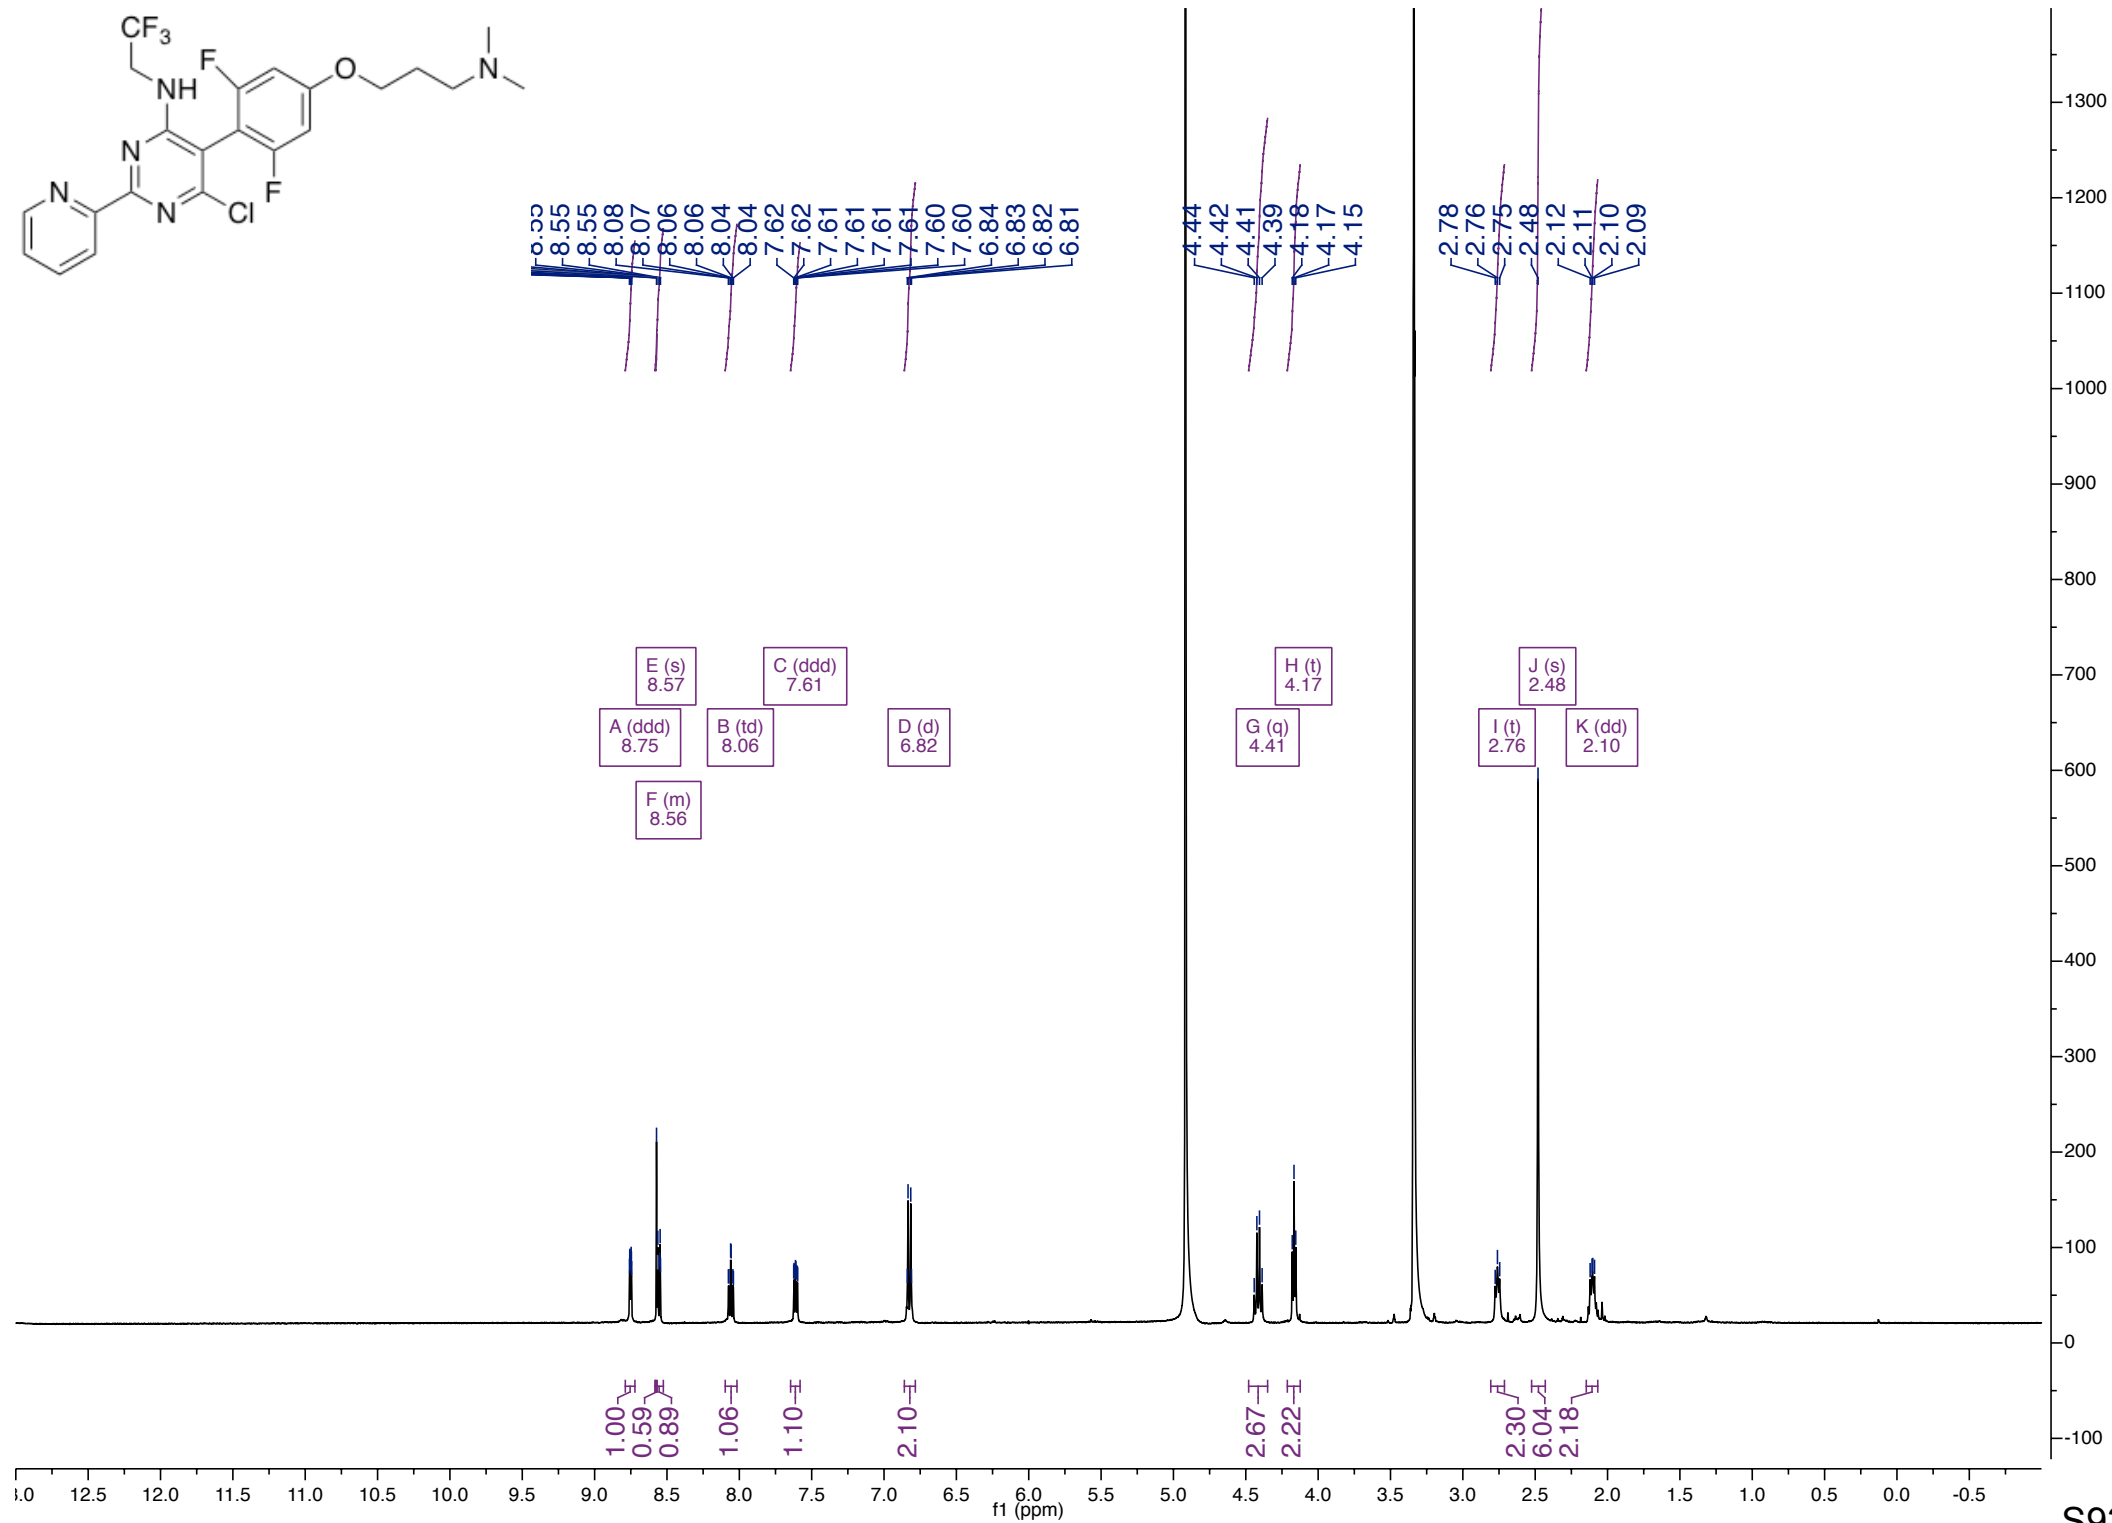

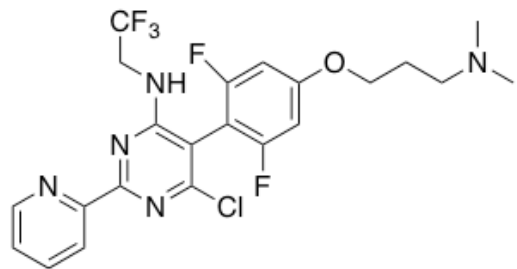

170.36  
164.16  
163.84  
163.81  
163.76  
163.70  
163.67  
163.59  
161.93  
161.88  
161.80  
154.88  
150.44

139.20  
129.67  
127.45  
127.18  
125.50  
125.23  
123.01  
106.57  
102.51  
102.34  
102.16  
100.48  
100.47  
100.44  
100.30  
100.26  
100.25

68.10

57.15

45.20  
43.32  
43.04  
42.77  
42.49

27.54

146.71  
140.70

279.27  
279.16  
279.16

21.63  
21.63

34.60  
34.60  
34.51

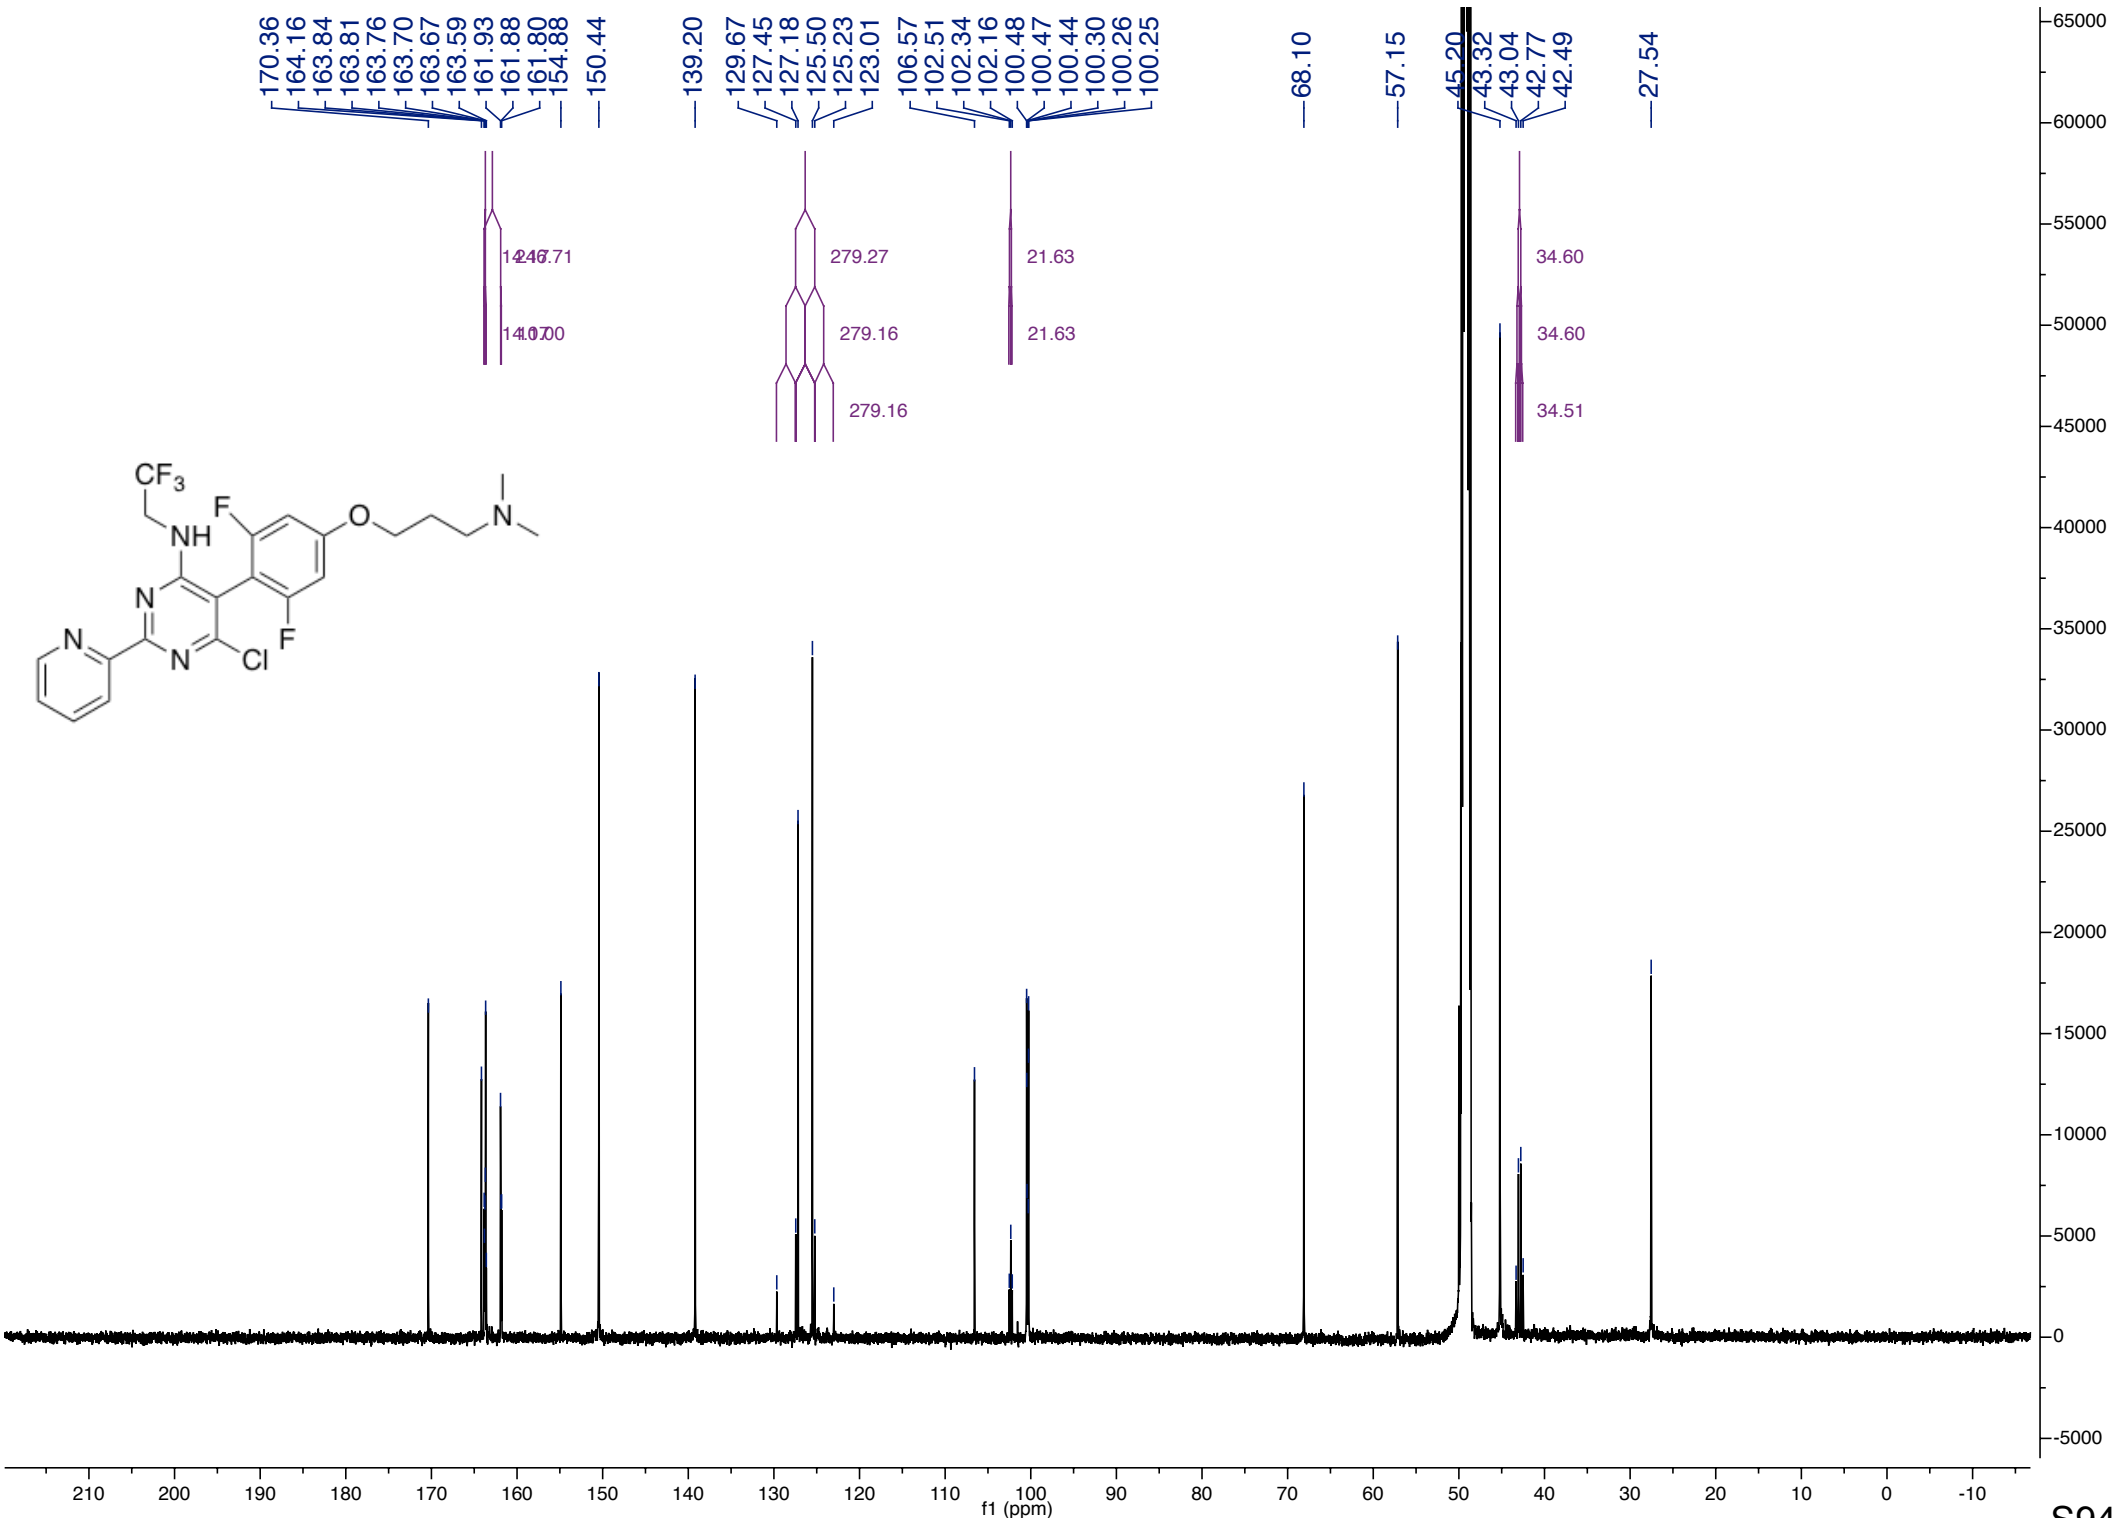

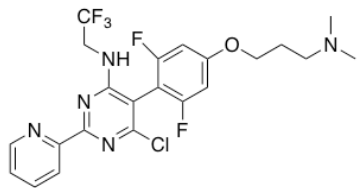

164.16

163.84  
163.81  
163.76  
163.70  
163.67  
163.59

161.93  
161.88  
161.80

14.17

14.17

246.71

10.00

D (t)  
163.70

C (dd)  
162.82

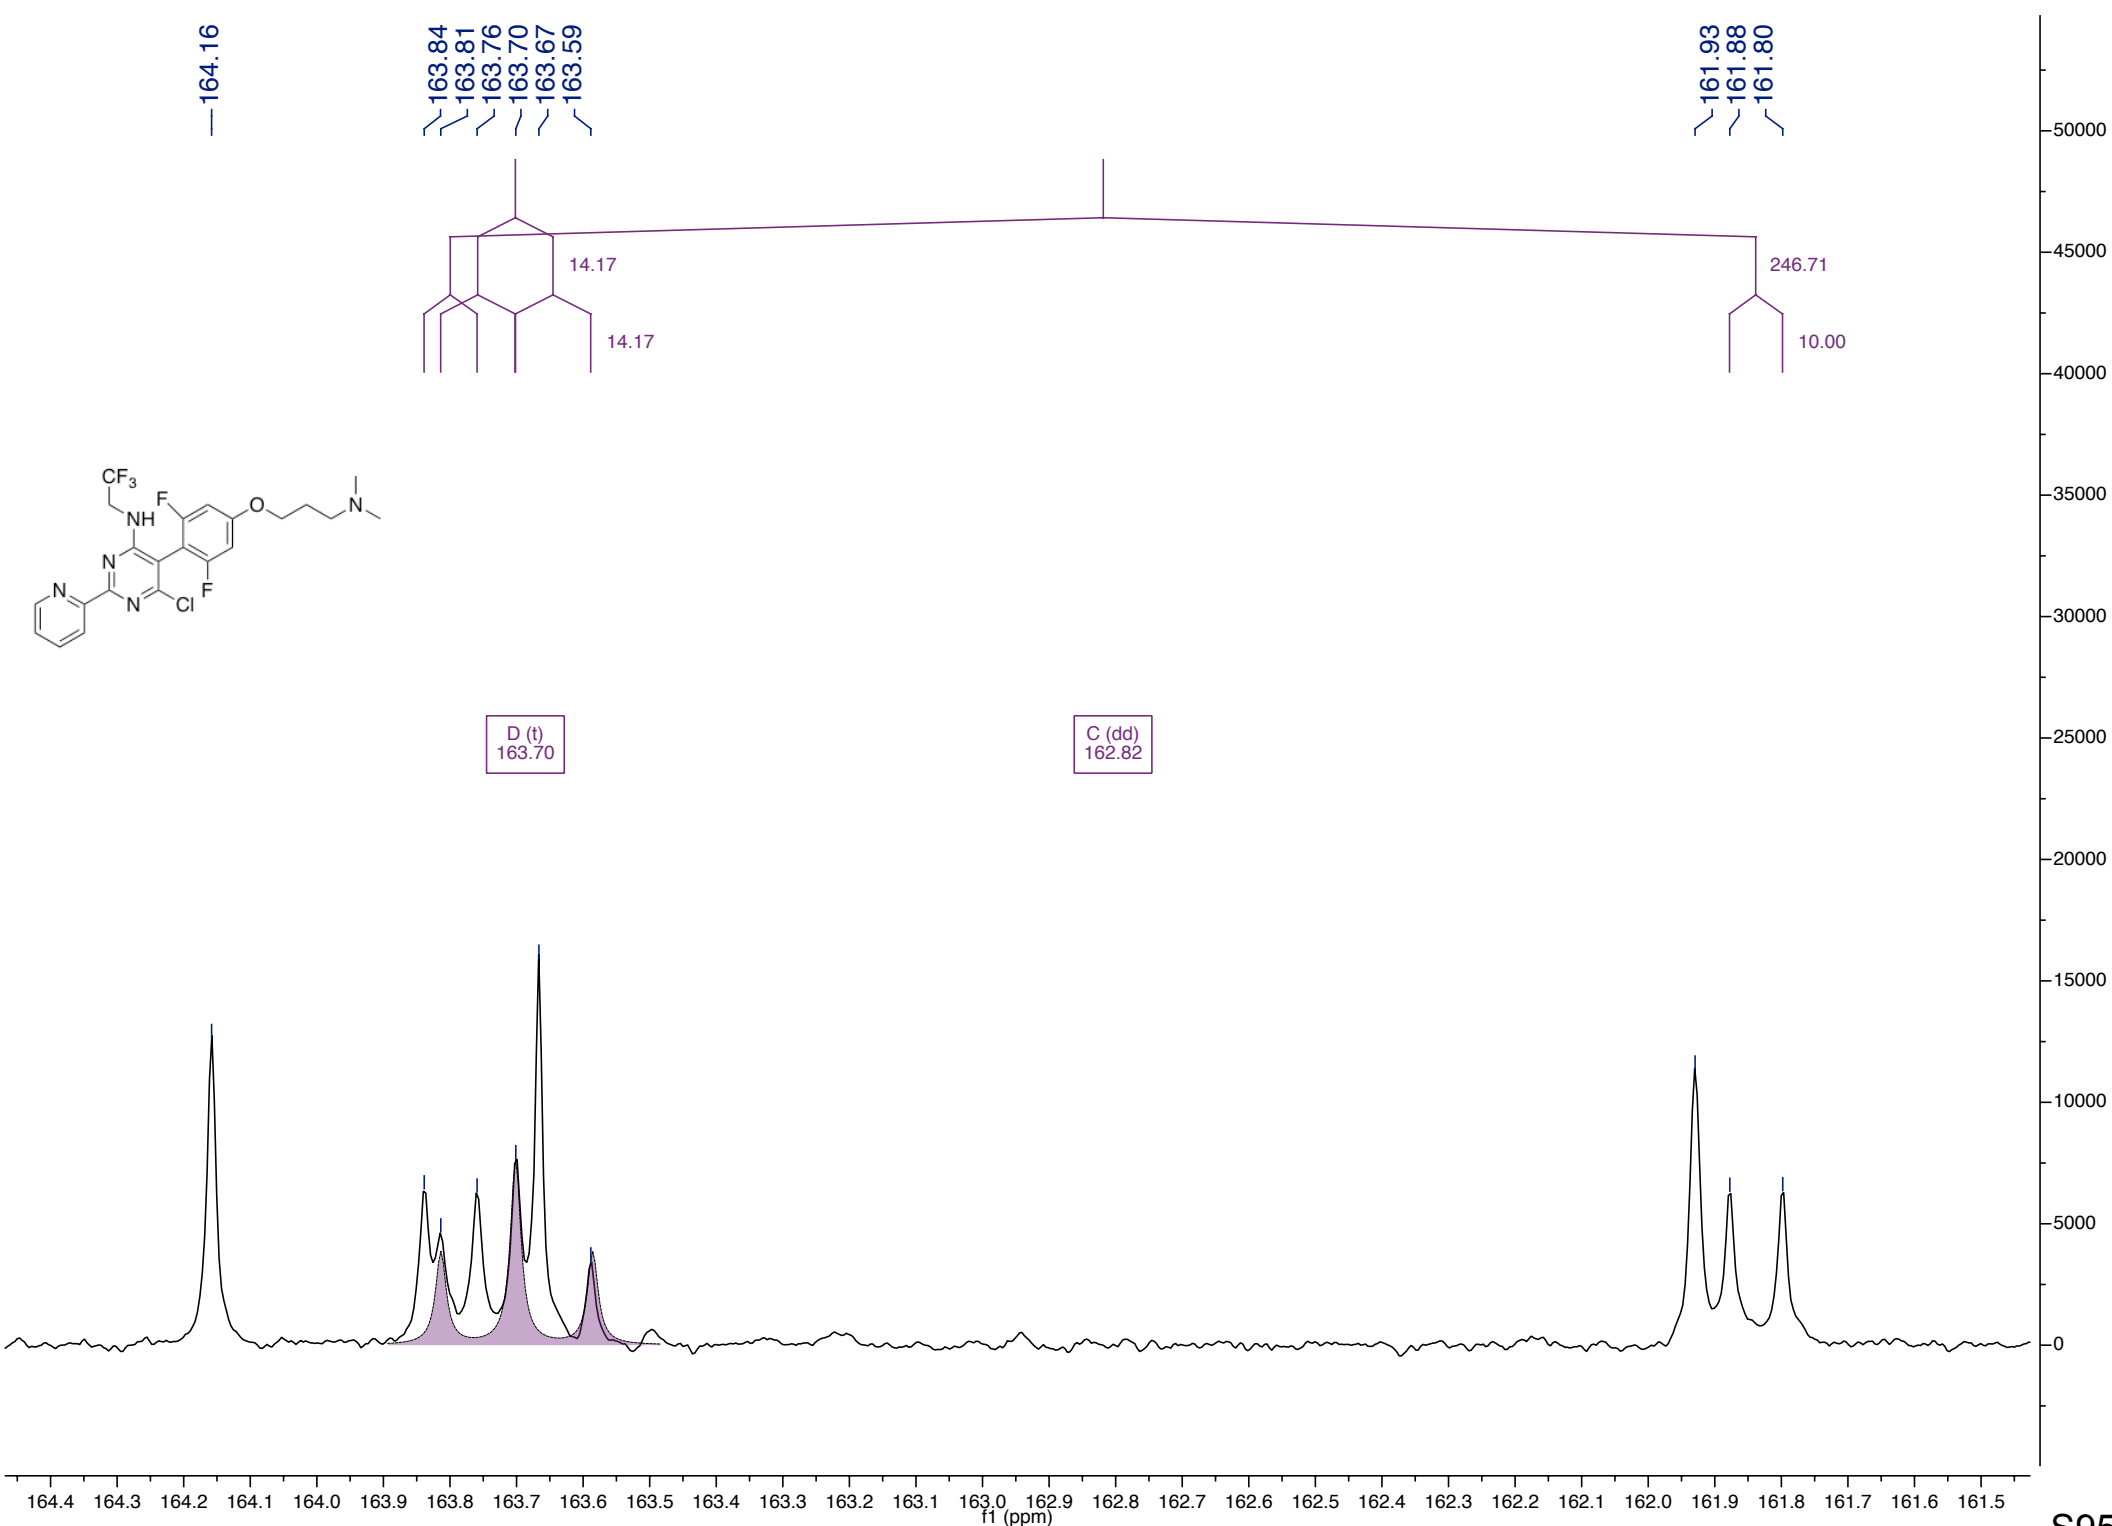



164.16

163.84  
163.81  
163.76  
163.70  
163.67  
163.59

161.93  
161.88  
161.80

14.17

14.17

246.71

10.00

D (t)  
163.70

C (dd)  
162.82

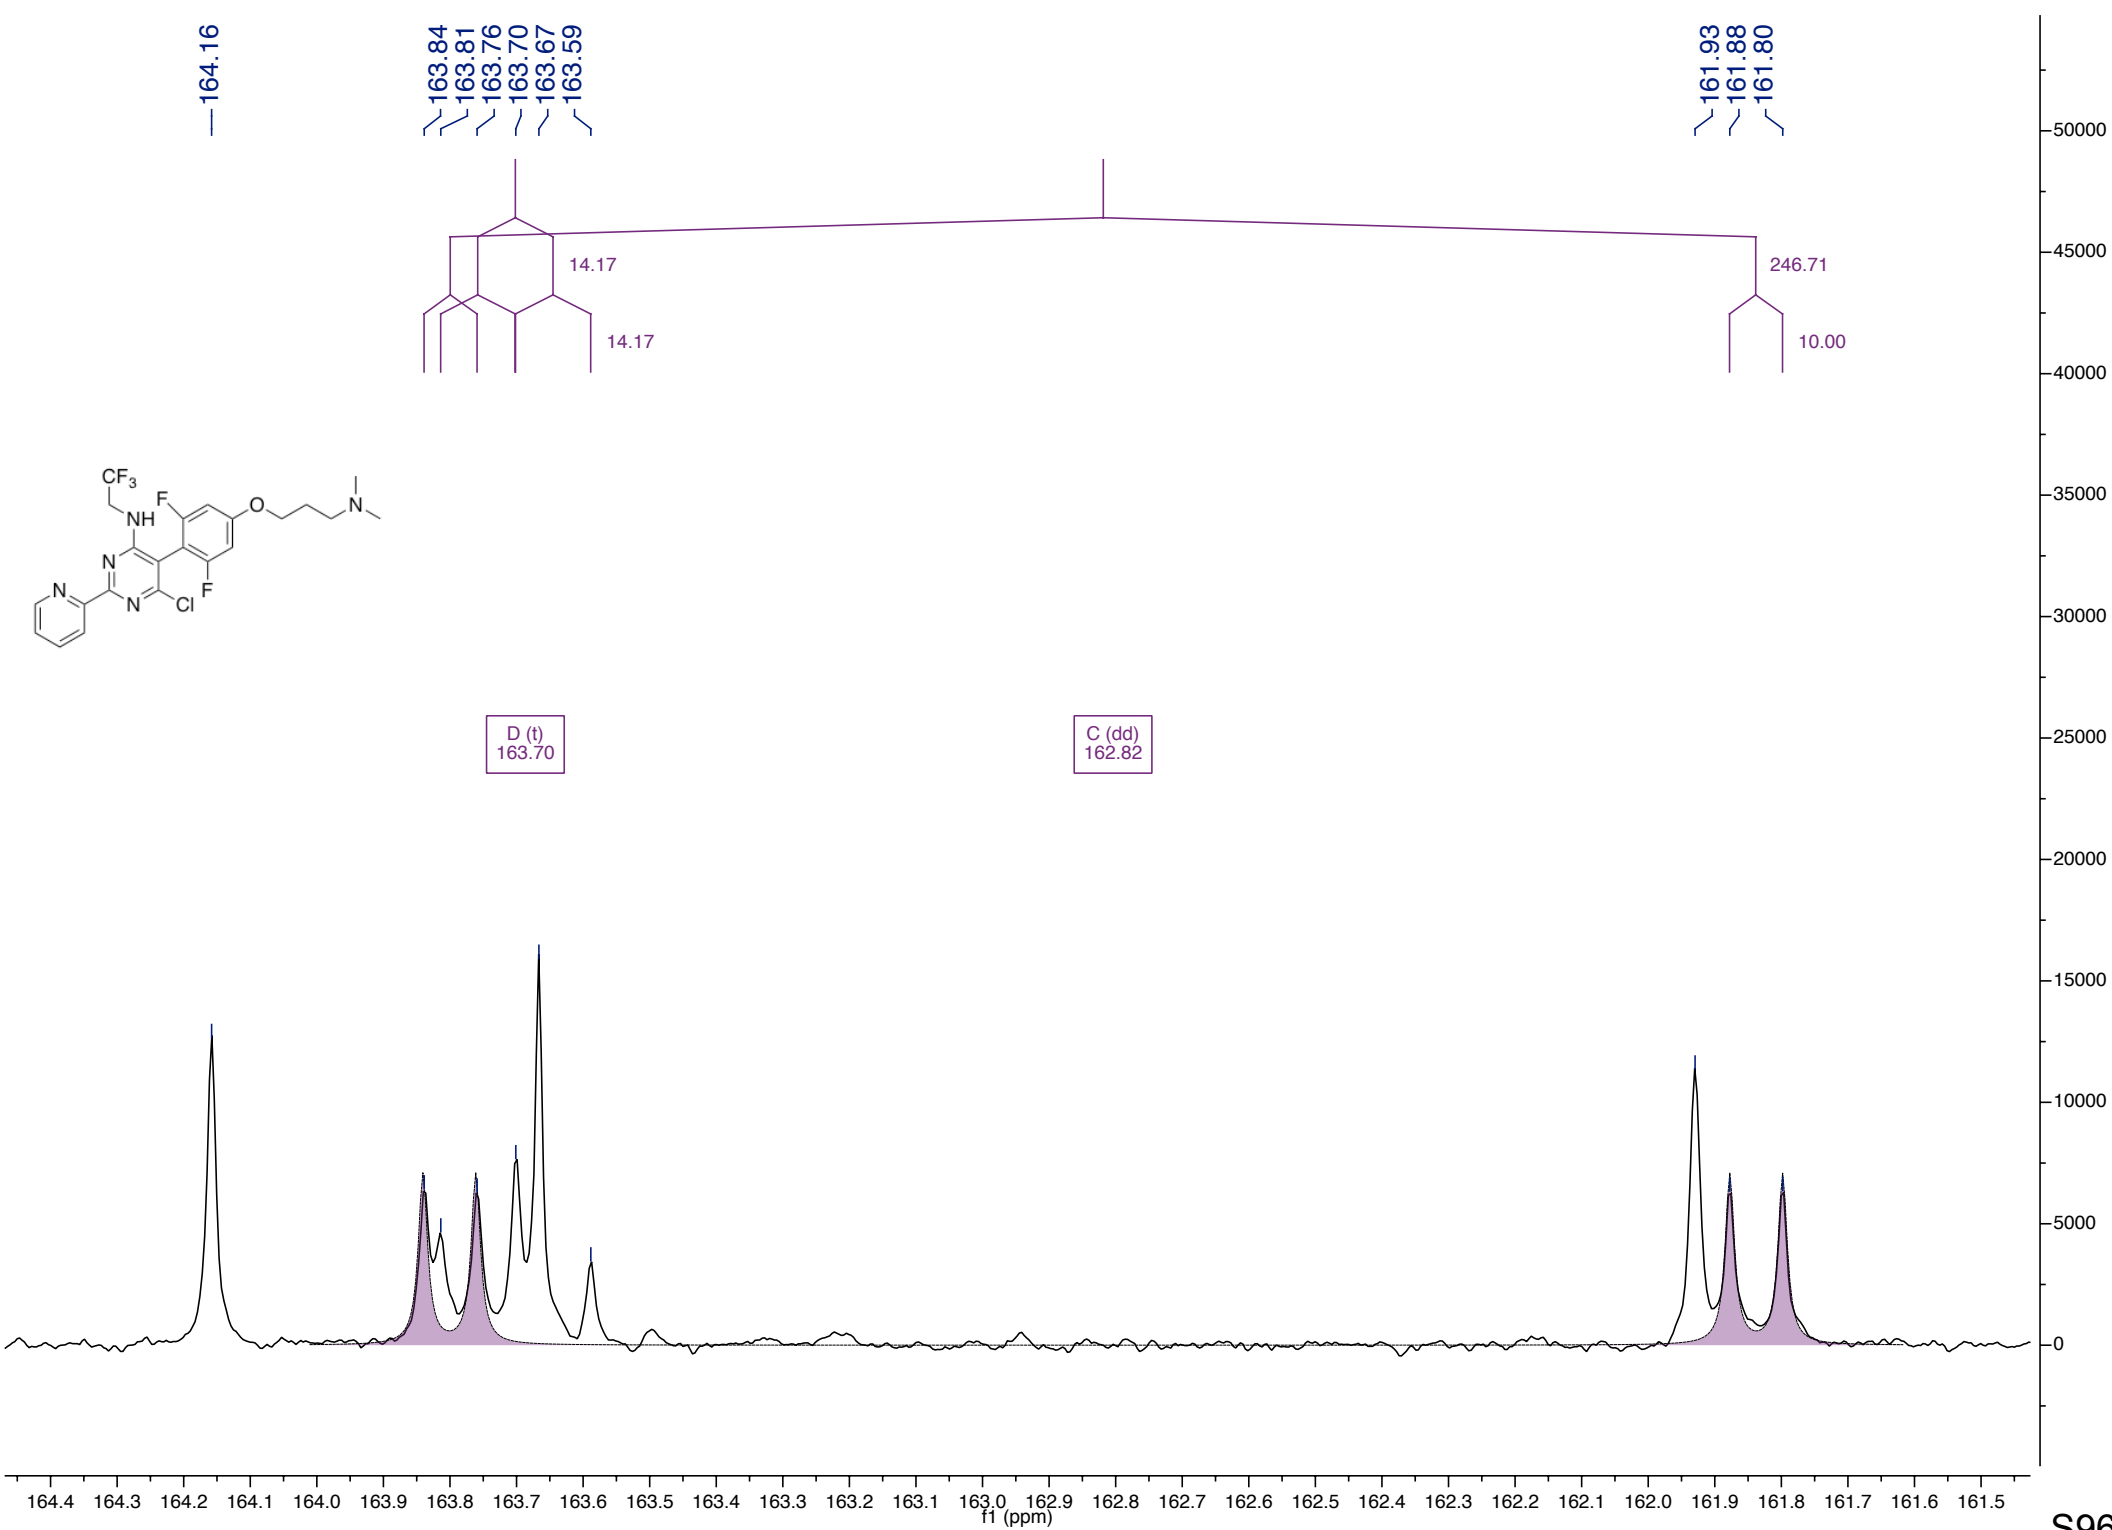



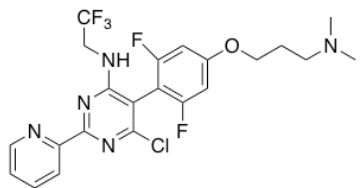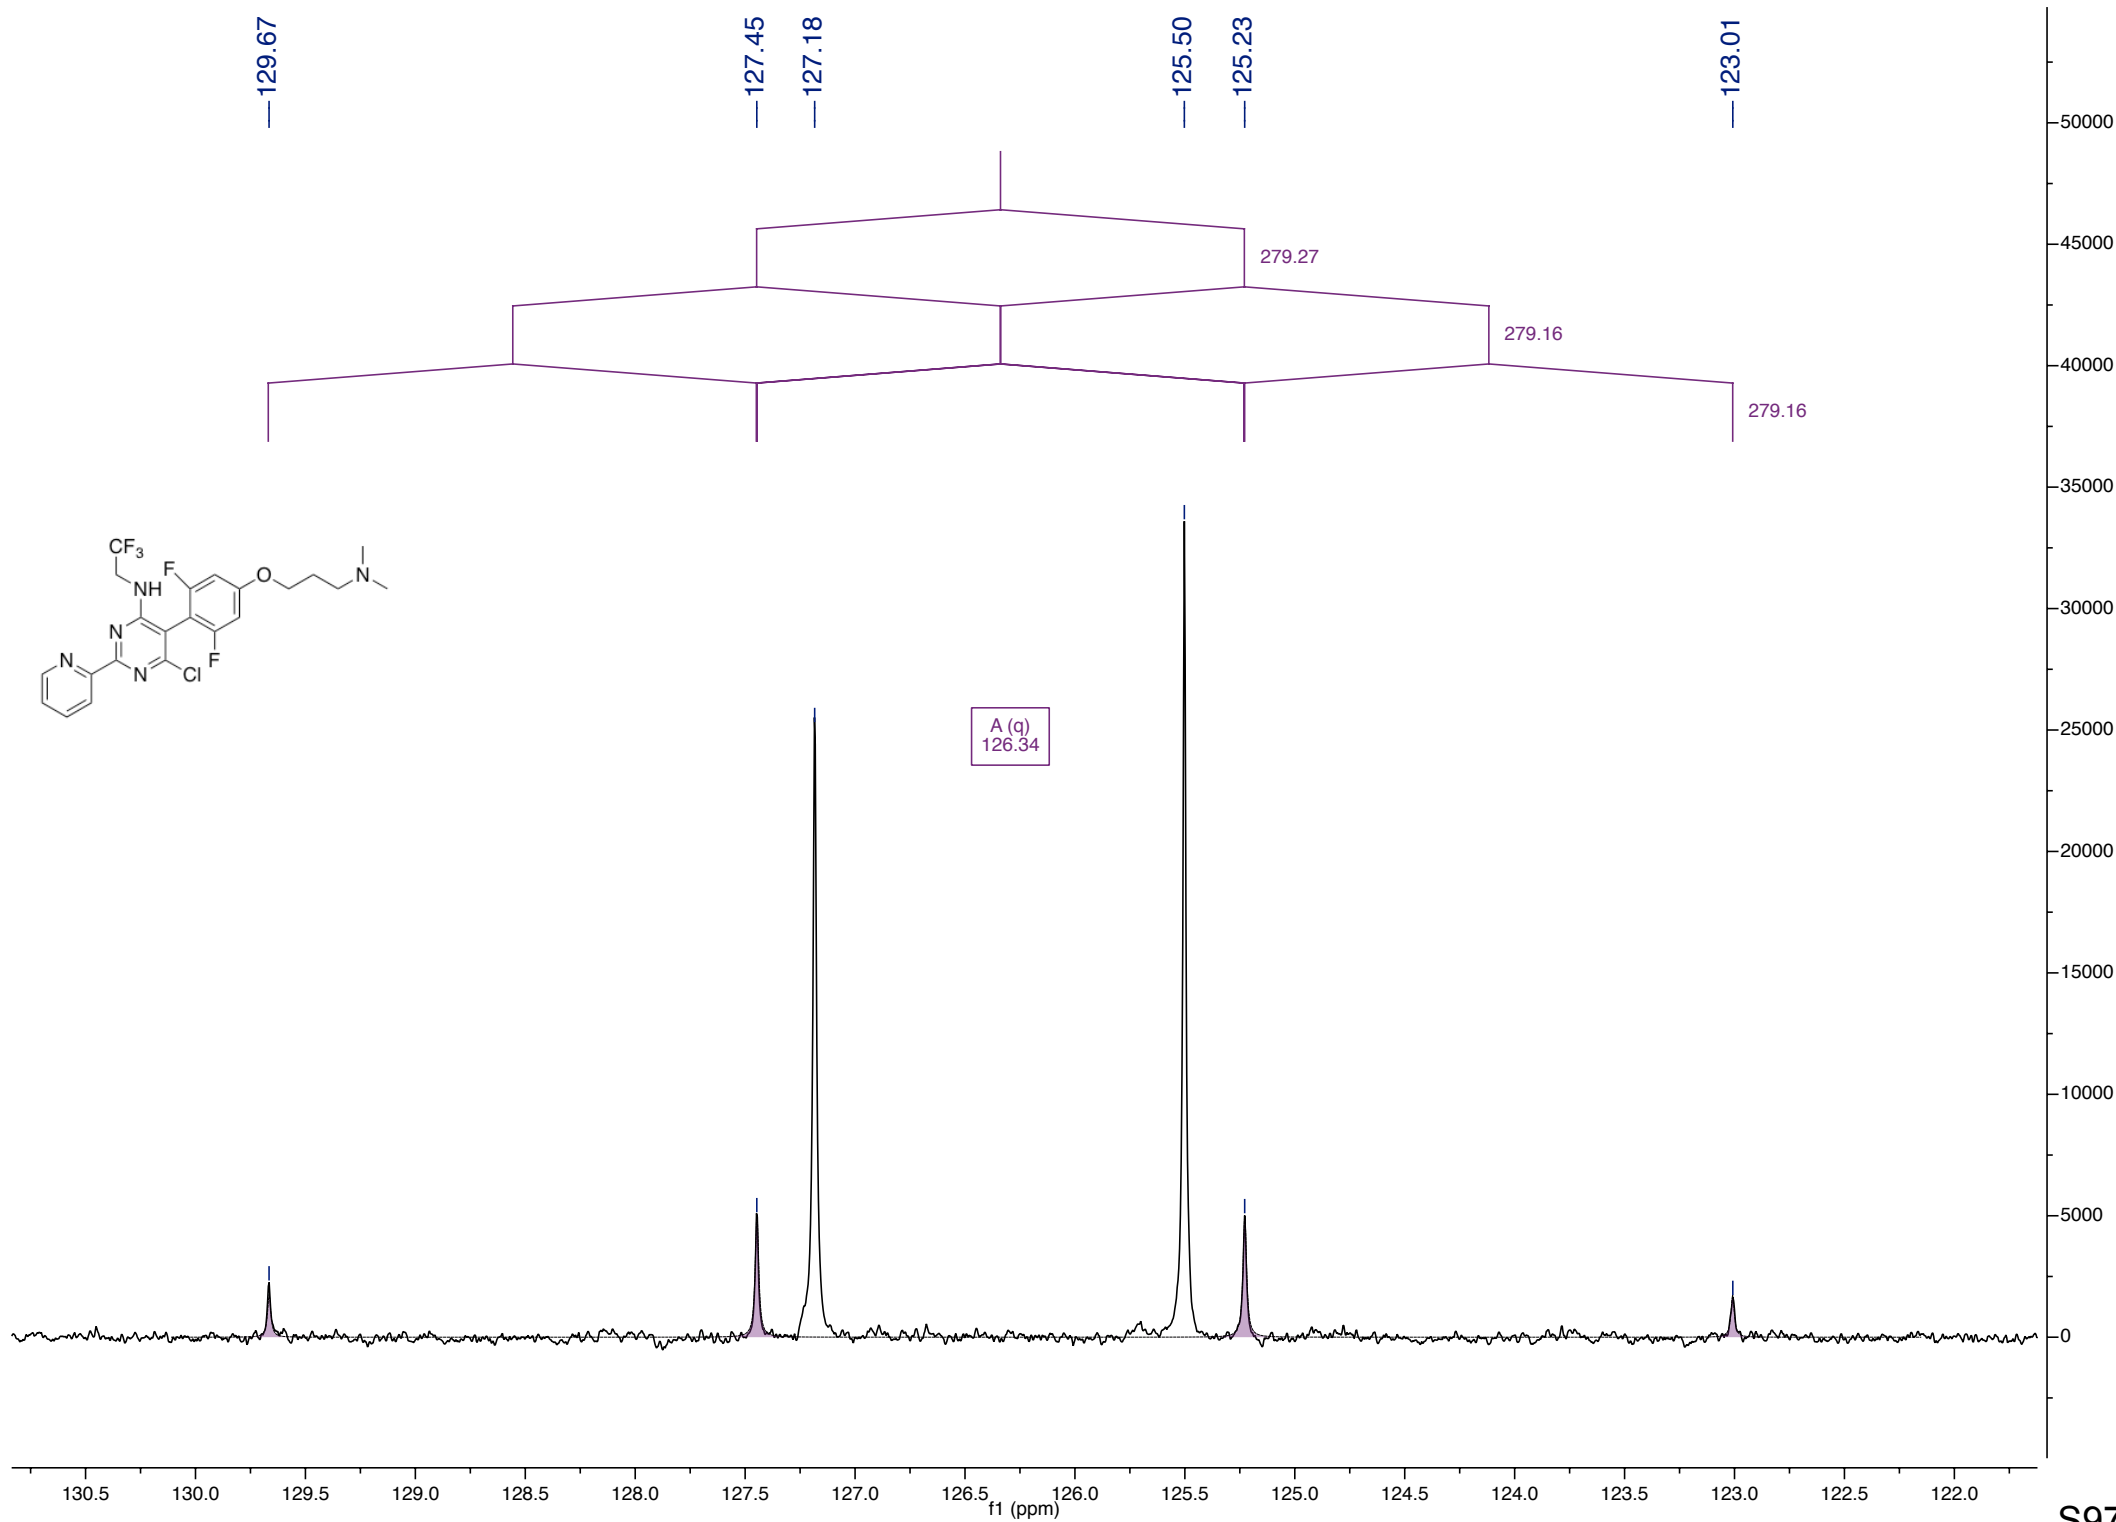

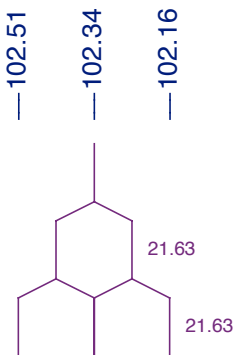

100.48  
100.47  
100.44  
100.30  
100.26  
100.25

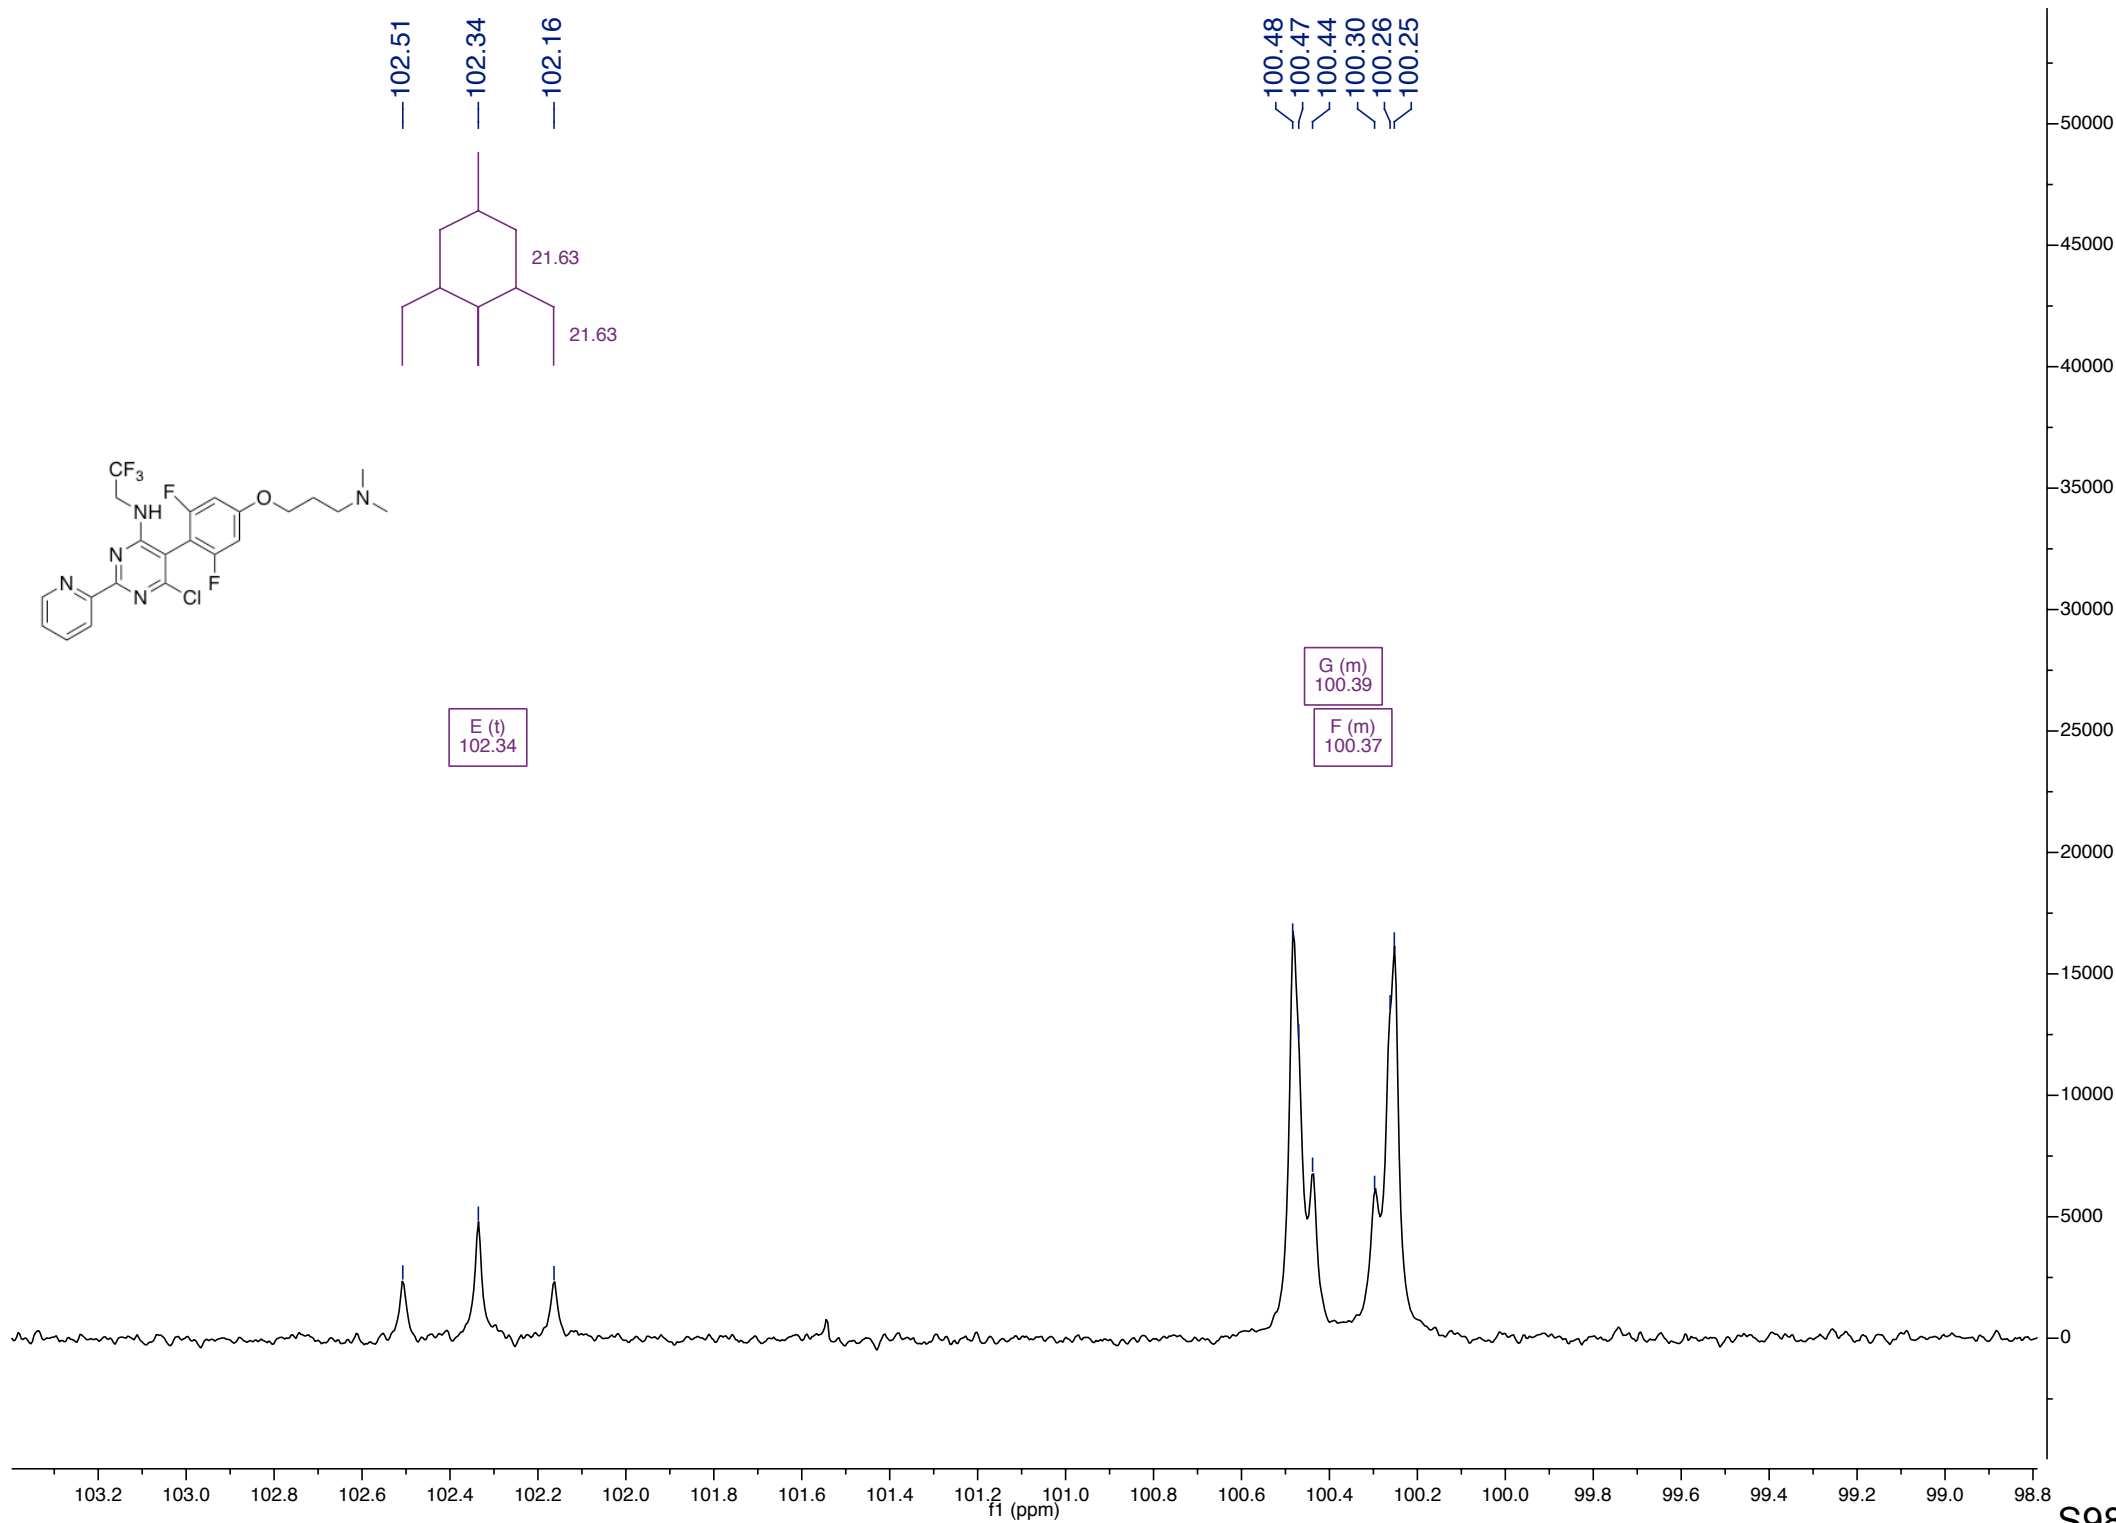

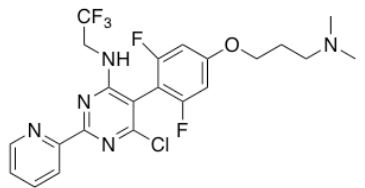

45.20

43.32  
43.04  
42.77  
42.49

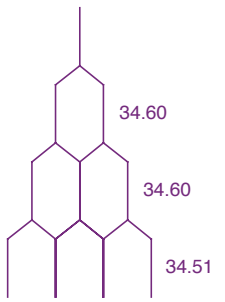

B (q)  
42.91

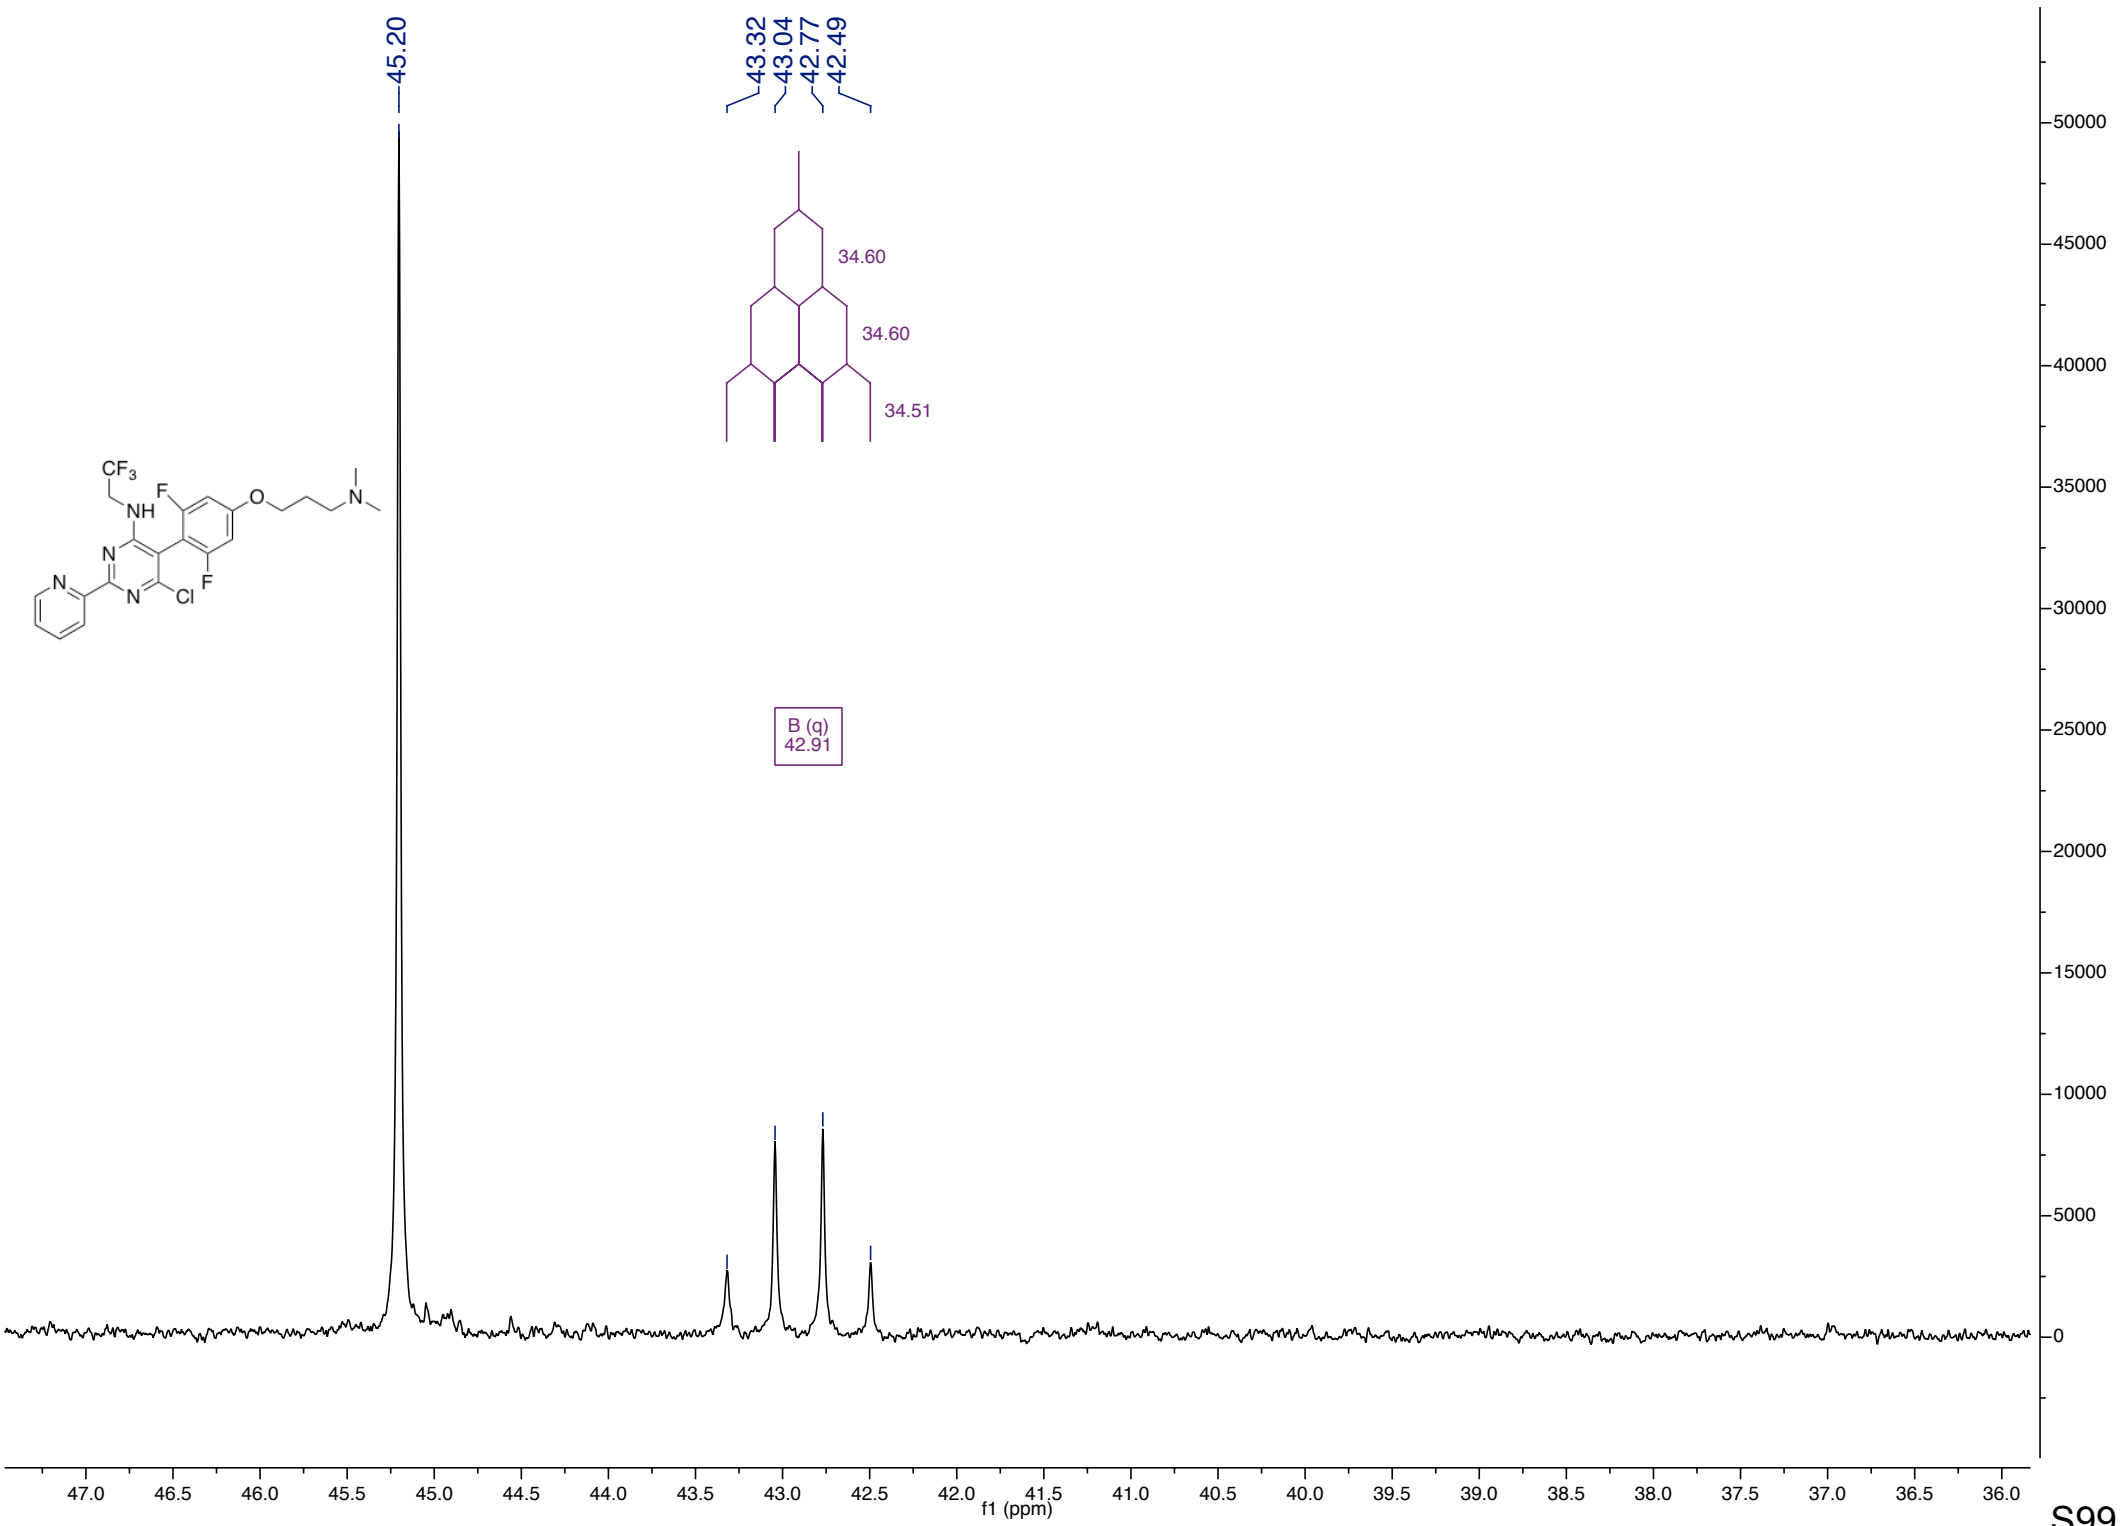

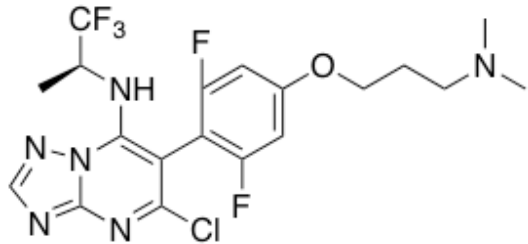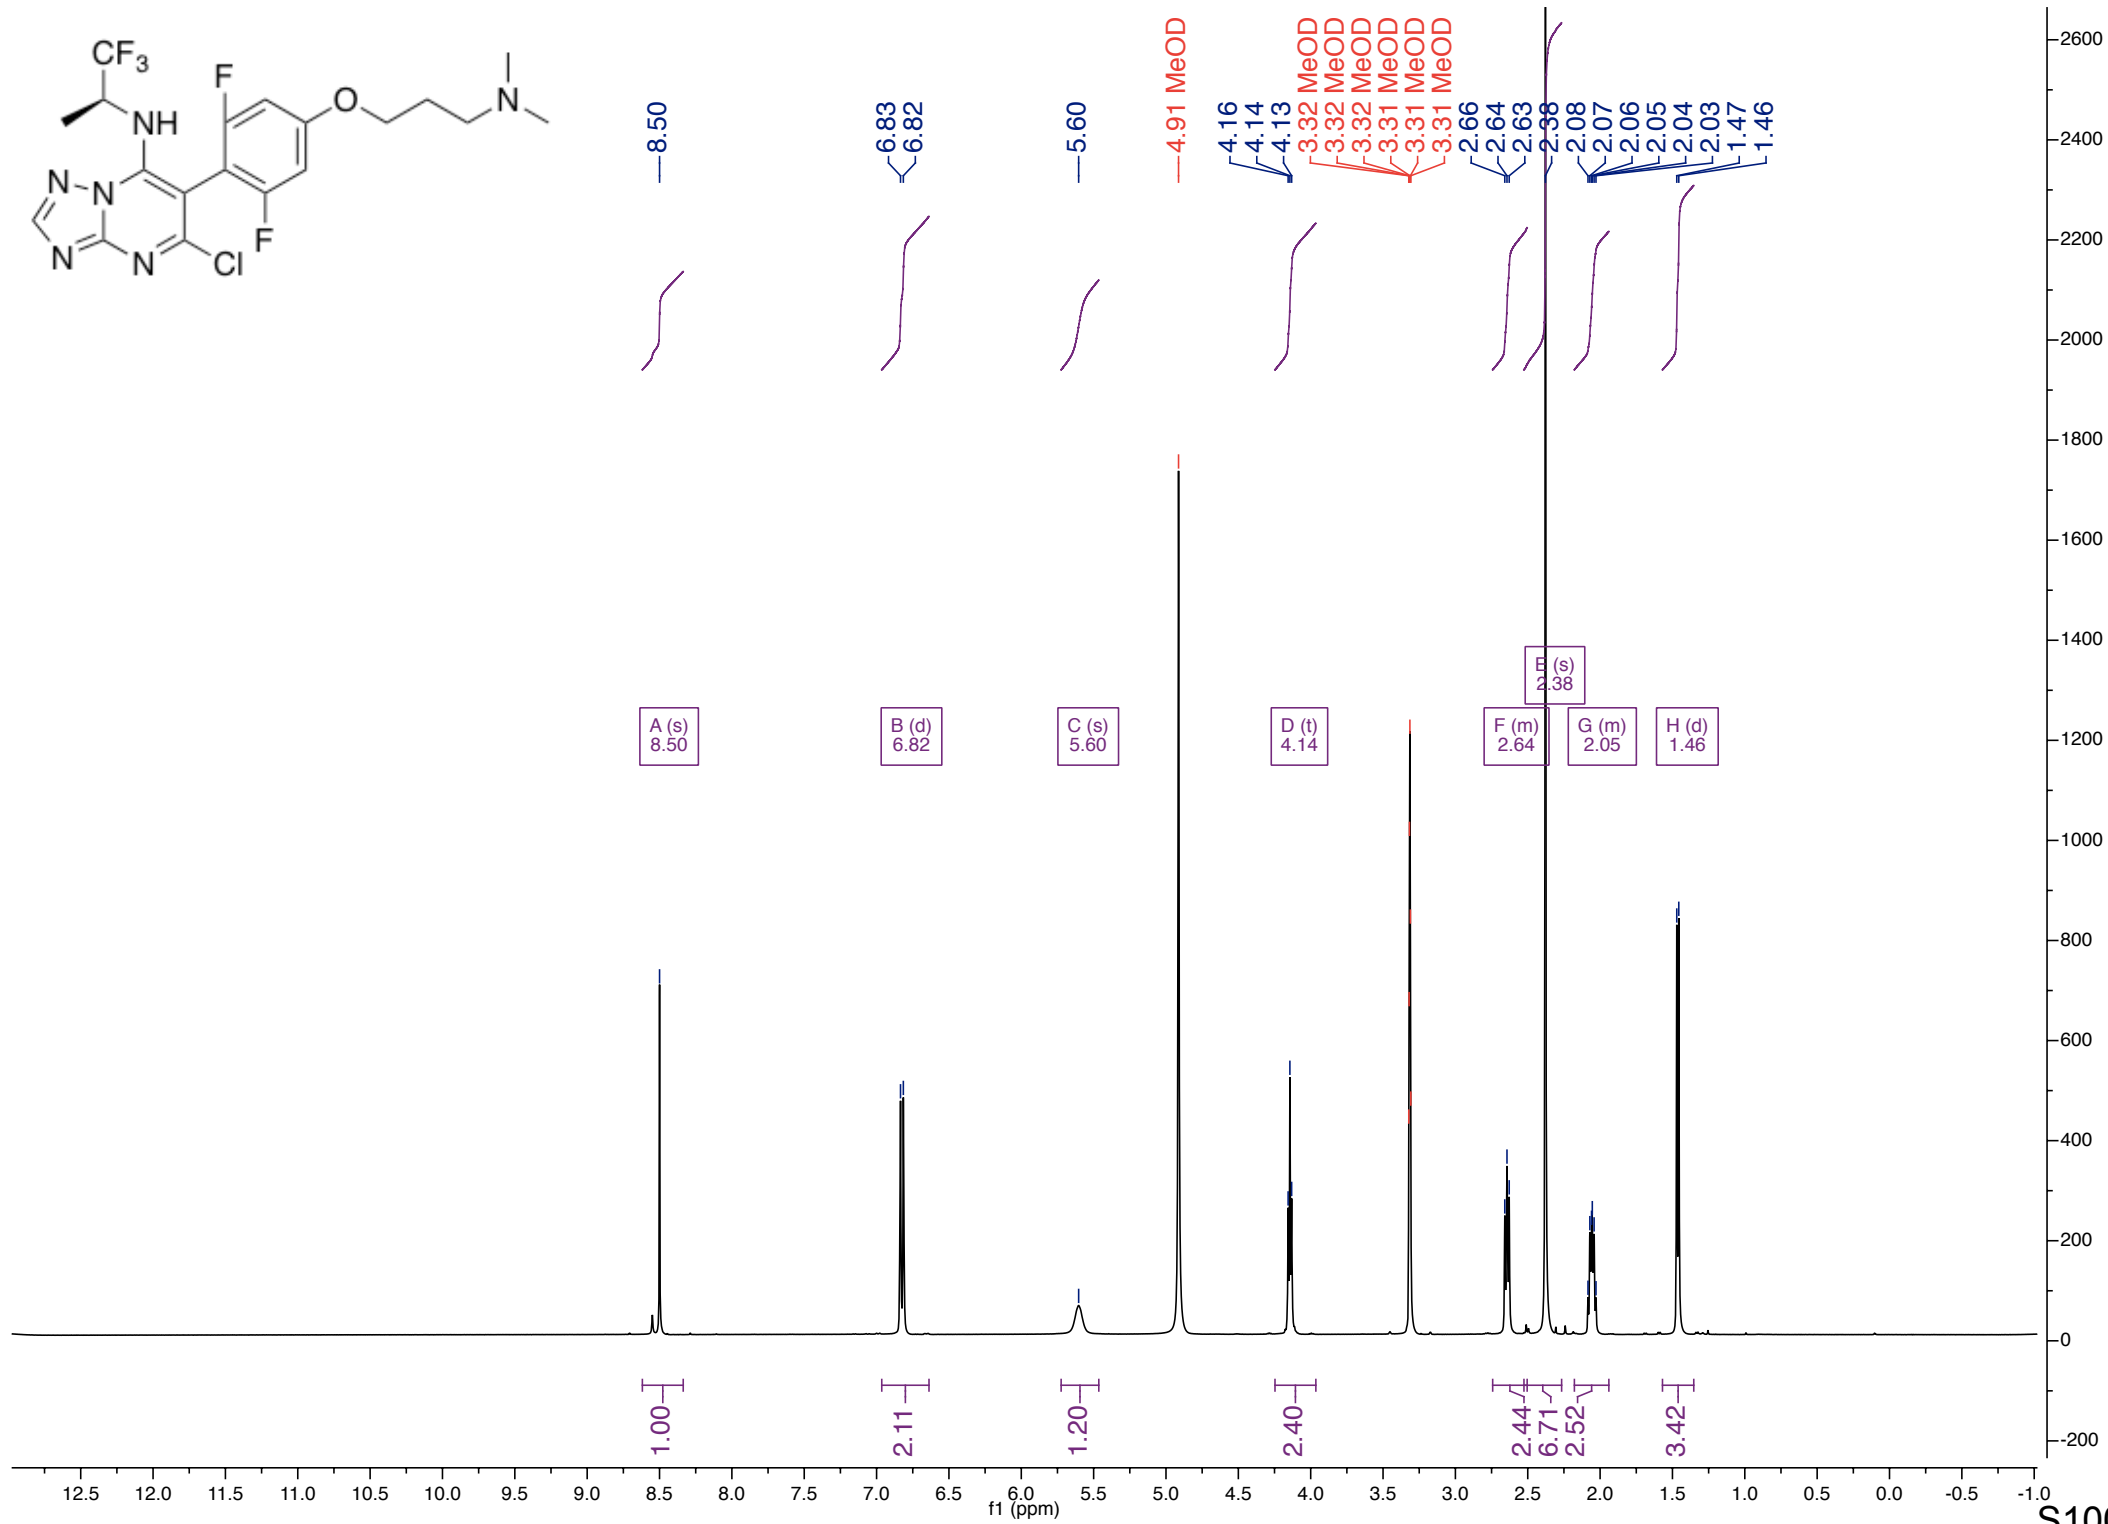

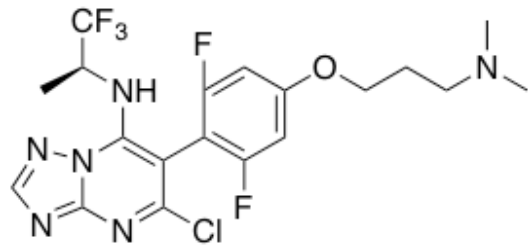

170.42 formic acid  
 164.68  
 164.60  
 164.43  
 164.32  
 164.21  
 164.02  
 163.95  
 162.71  
 162.64  
 162.06  
 161.99  
 159.57  
 156.12  
 155.87  
 149.34

130.07  
 127.83  
 125.59  
 123.35  
 102.44  
 102.28  
 102.10  
 100.64  
 100.61  
 100.43  
 100.41  
 100.29  
 100.27  
 100.09  
 100.06  
 94.91

68.32

57.18  
 52.75  
 52.50  
 52.25  
 52.00  
 45.40

27.77

14.05

B (t)  
 164.32  
 A (dd)  
 163.66  
 C (dd)  
 163.01

D (q)  
 126.71

E (t)  
 102.27

G (dd)  
 100.18

F (dd)  
 100.52

H (q)  
 52.37

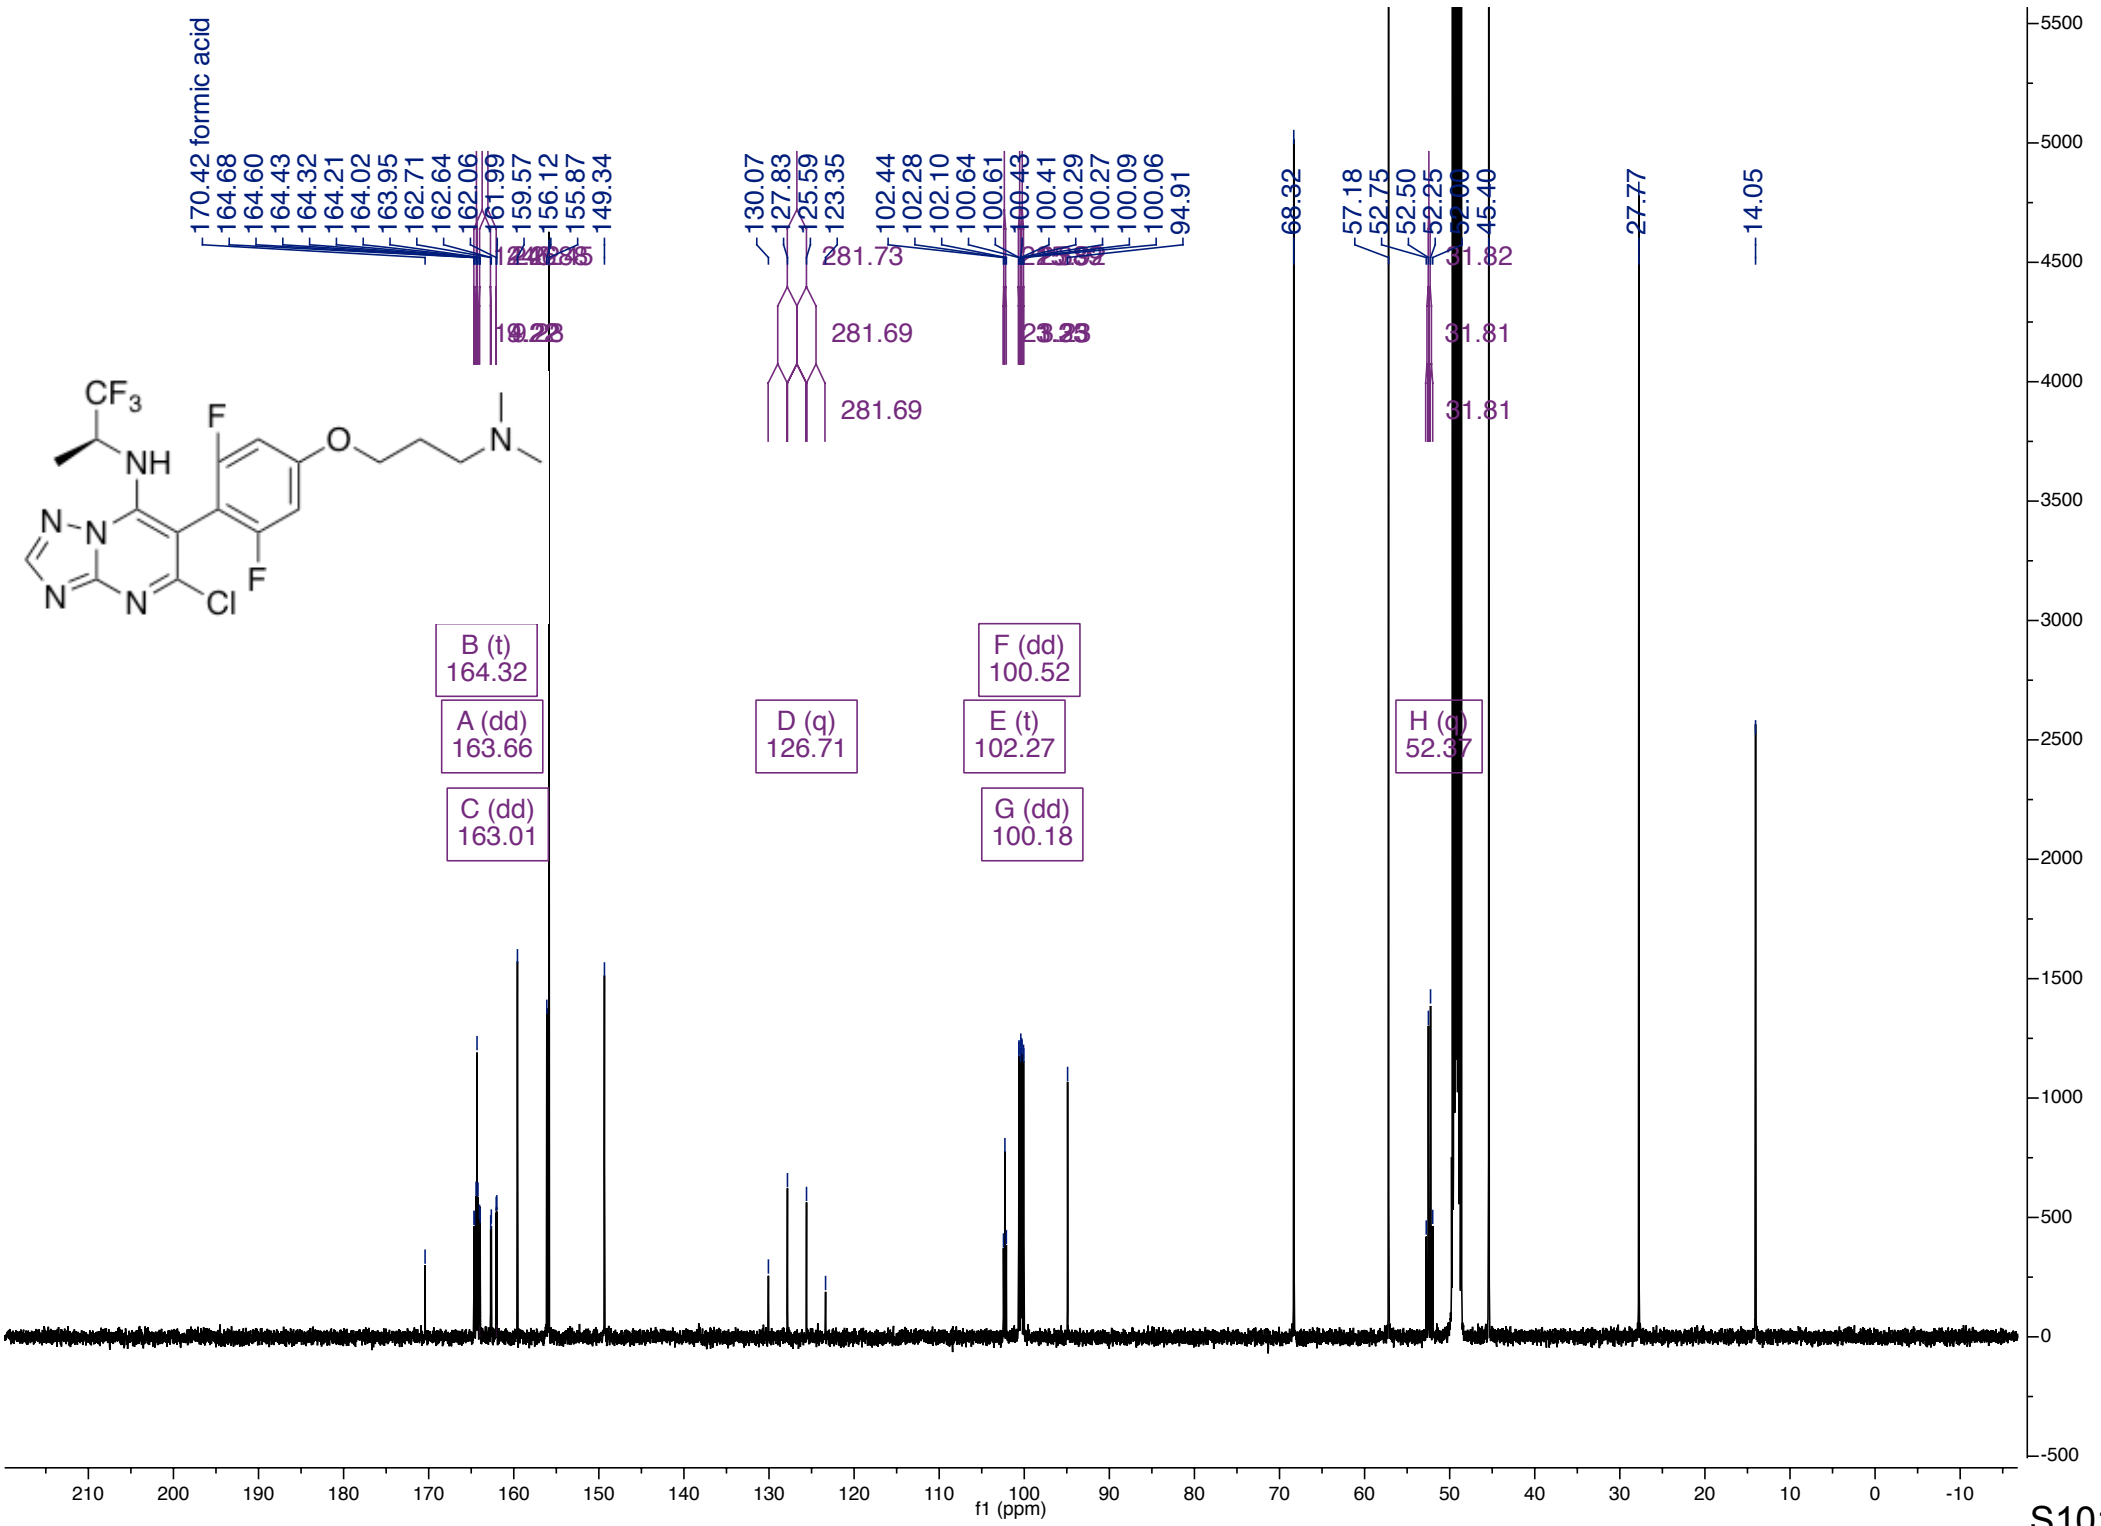

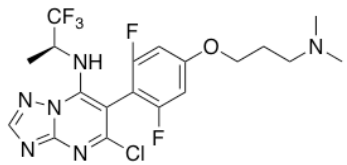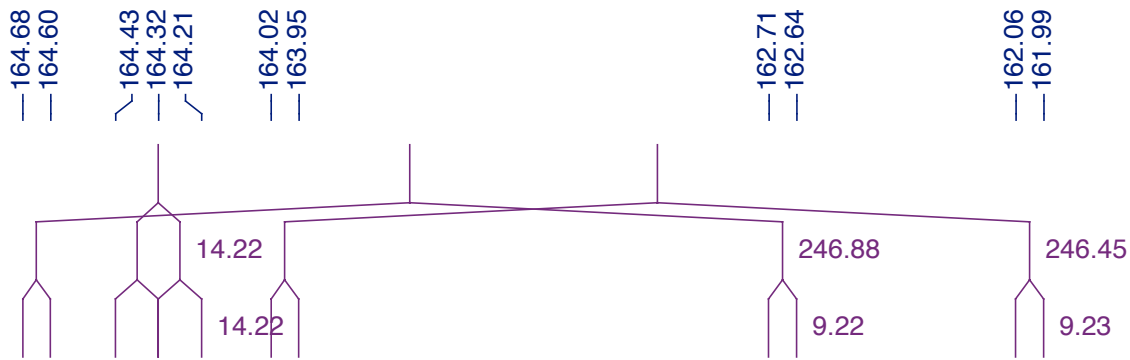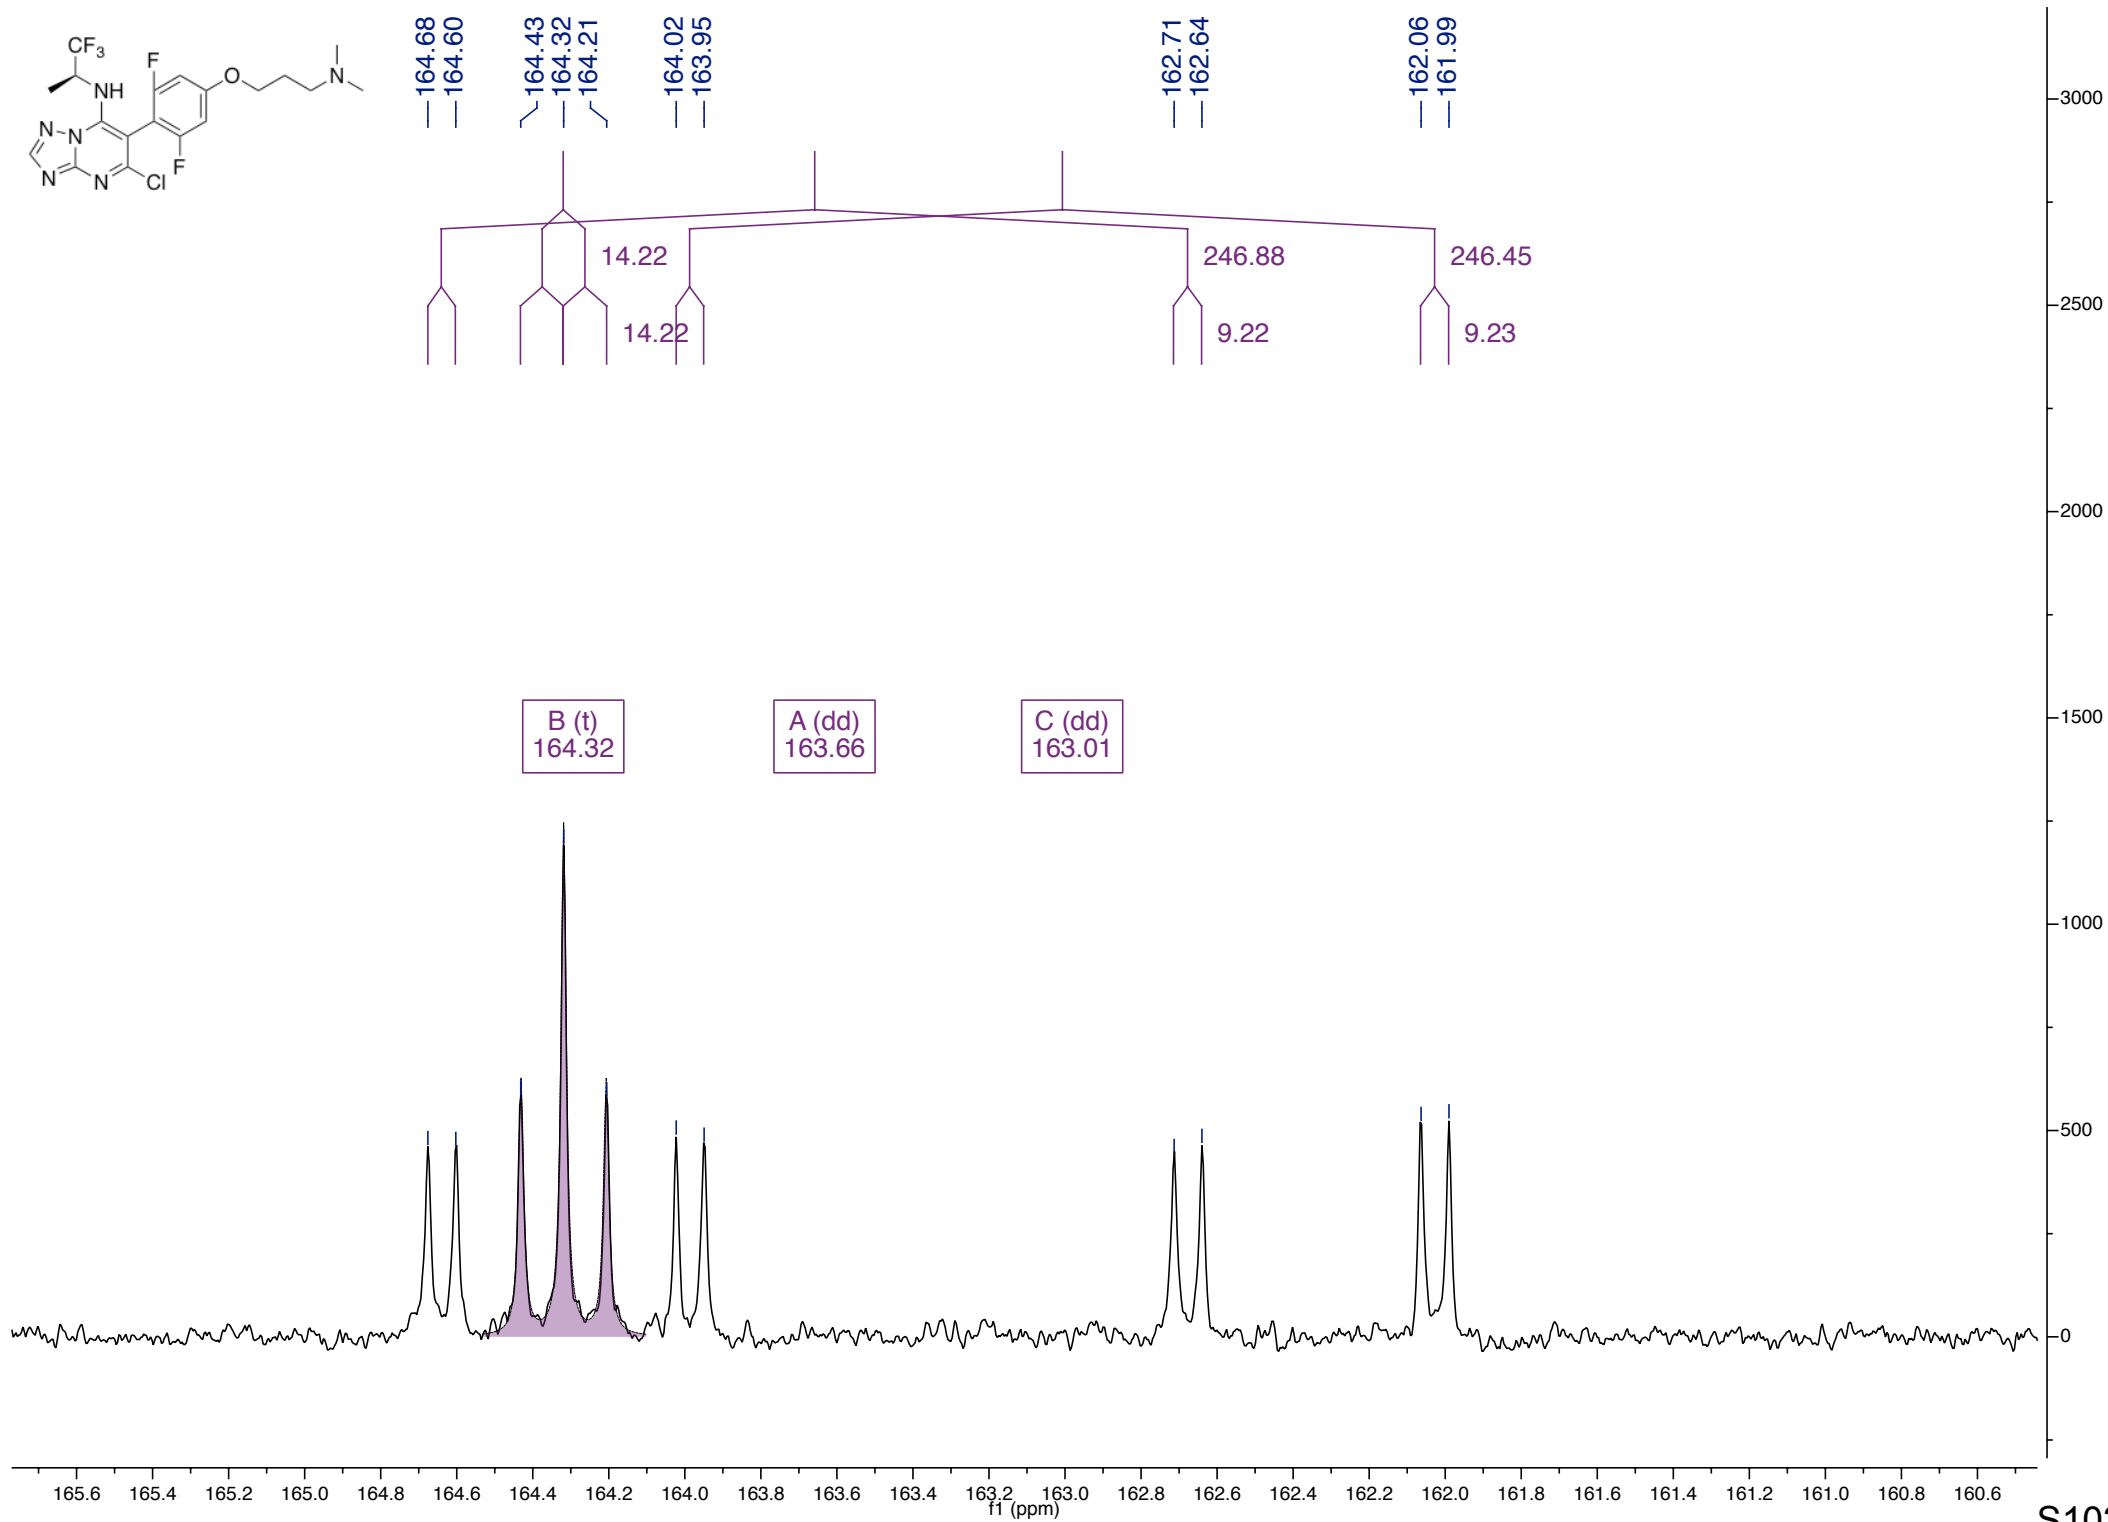

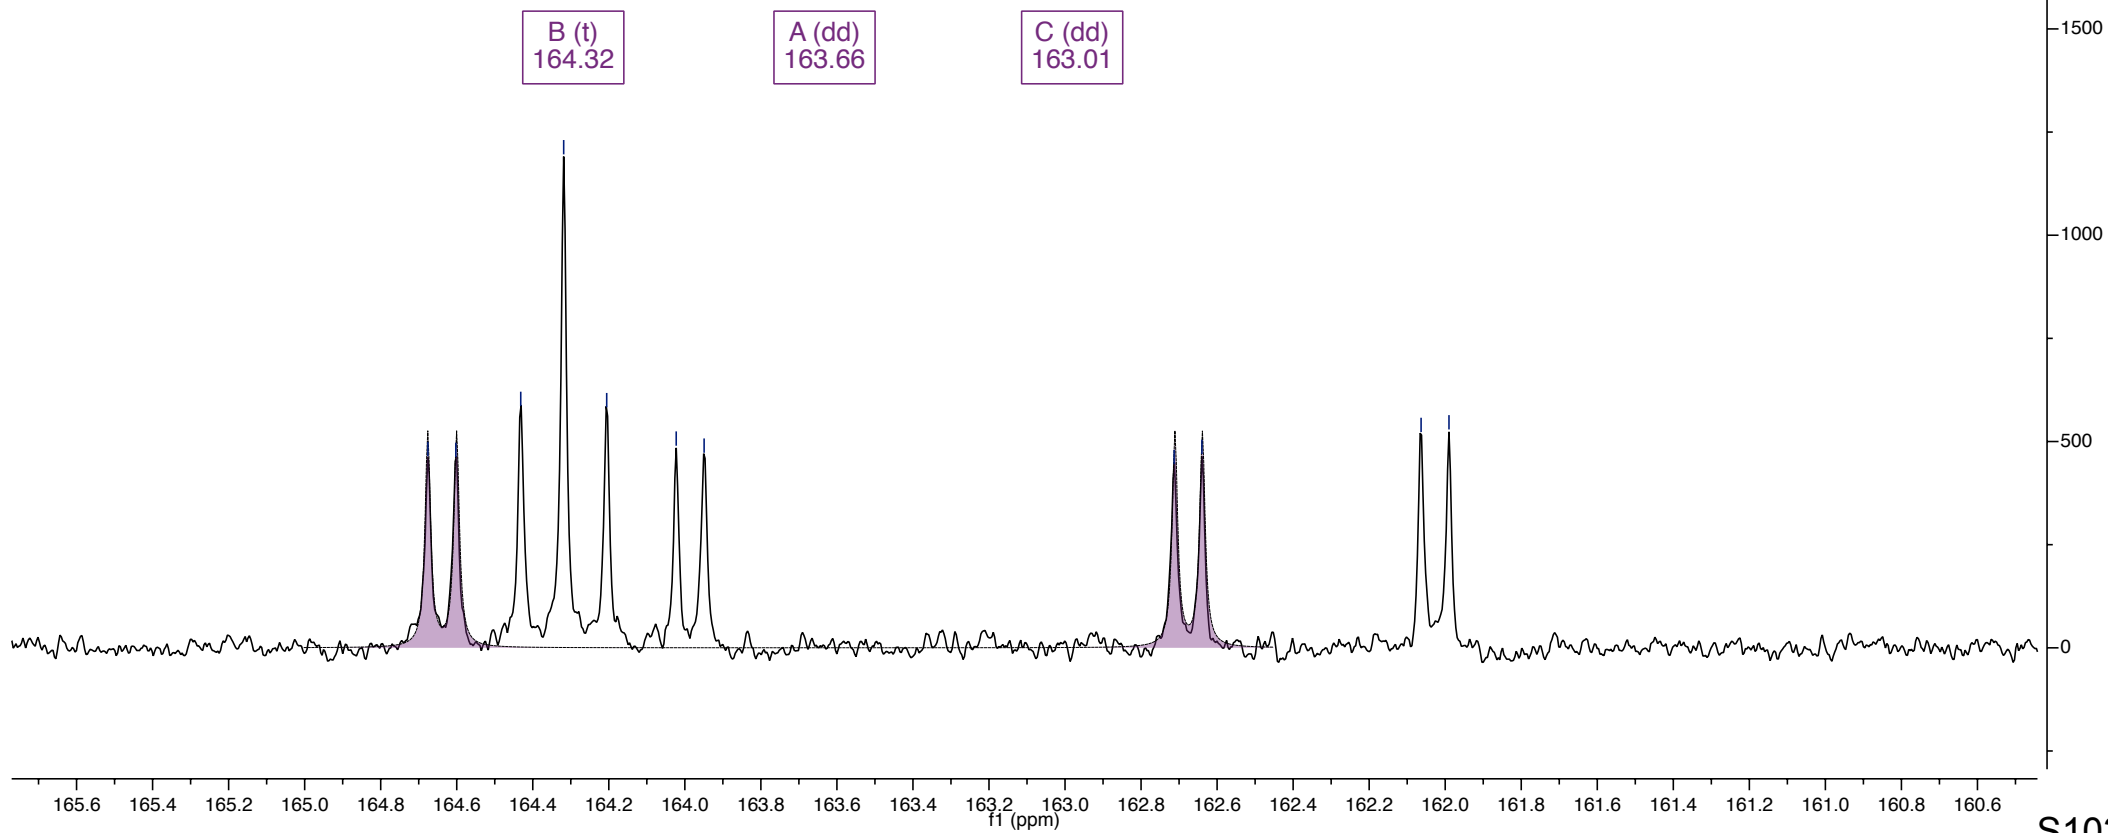

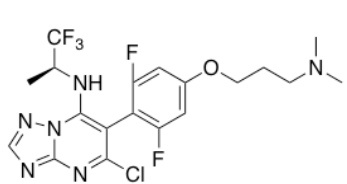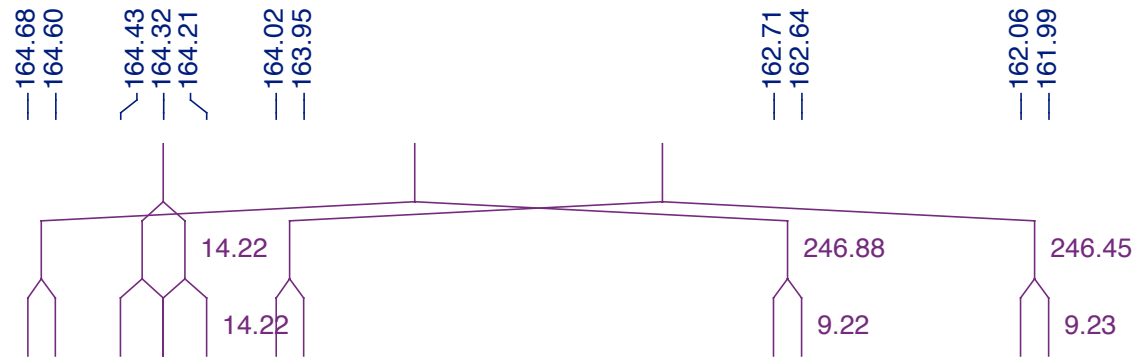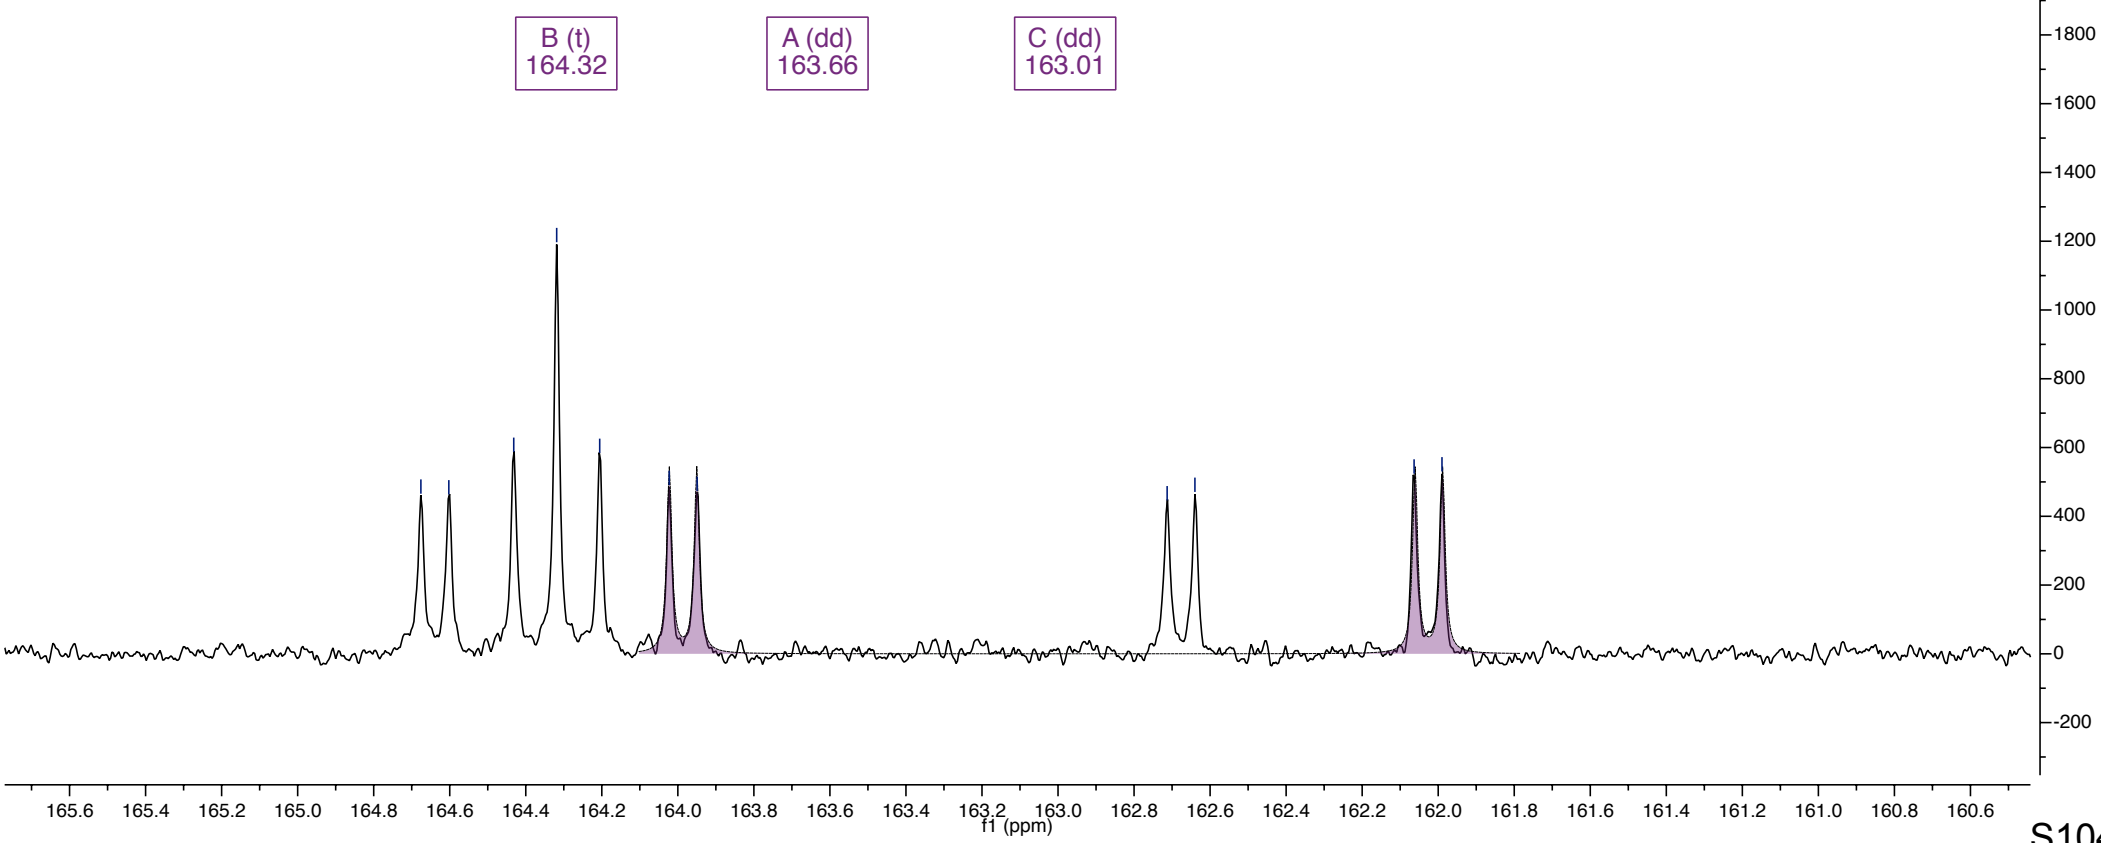



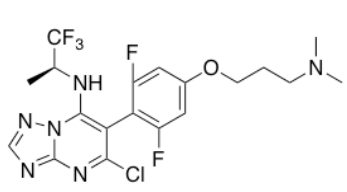

— 130.07

— 127.83

— 125.59

— 123.35

281.73

281.69

281.69

D (q)  
126.71

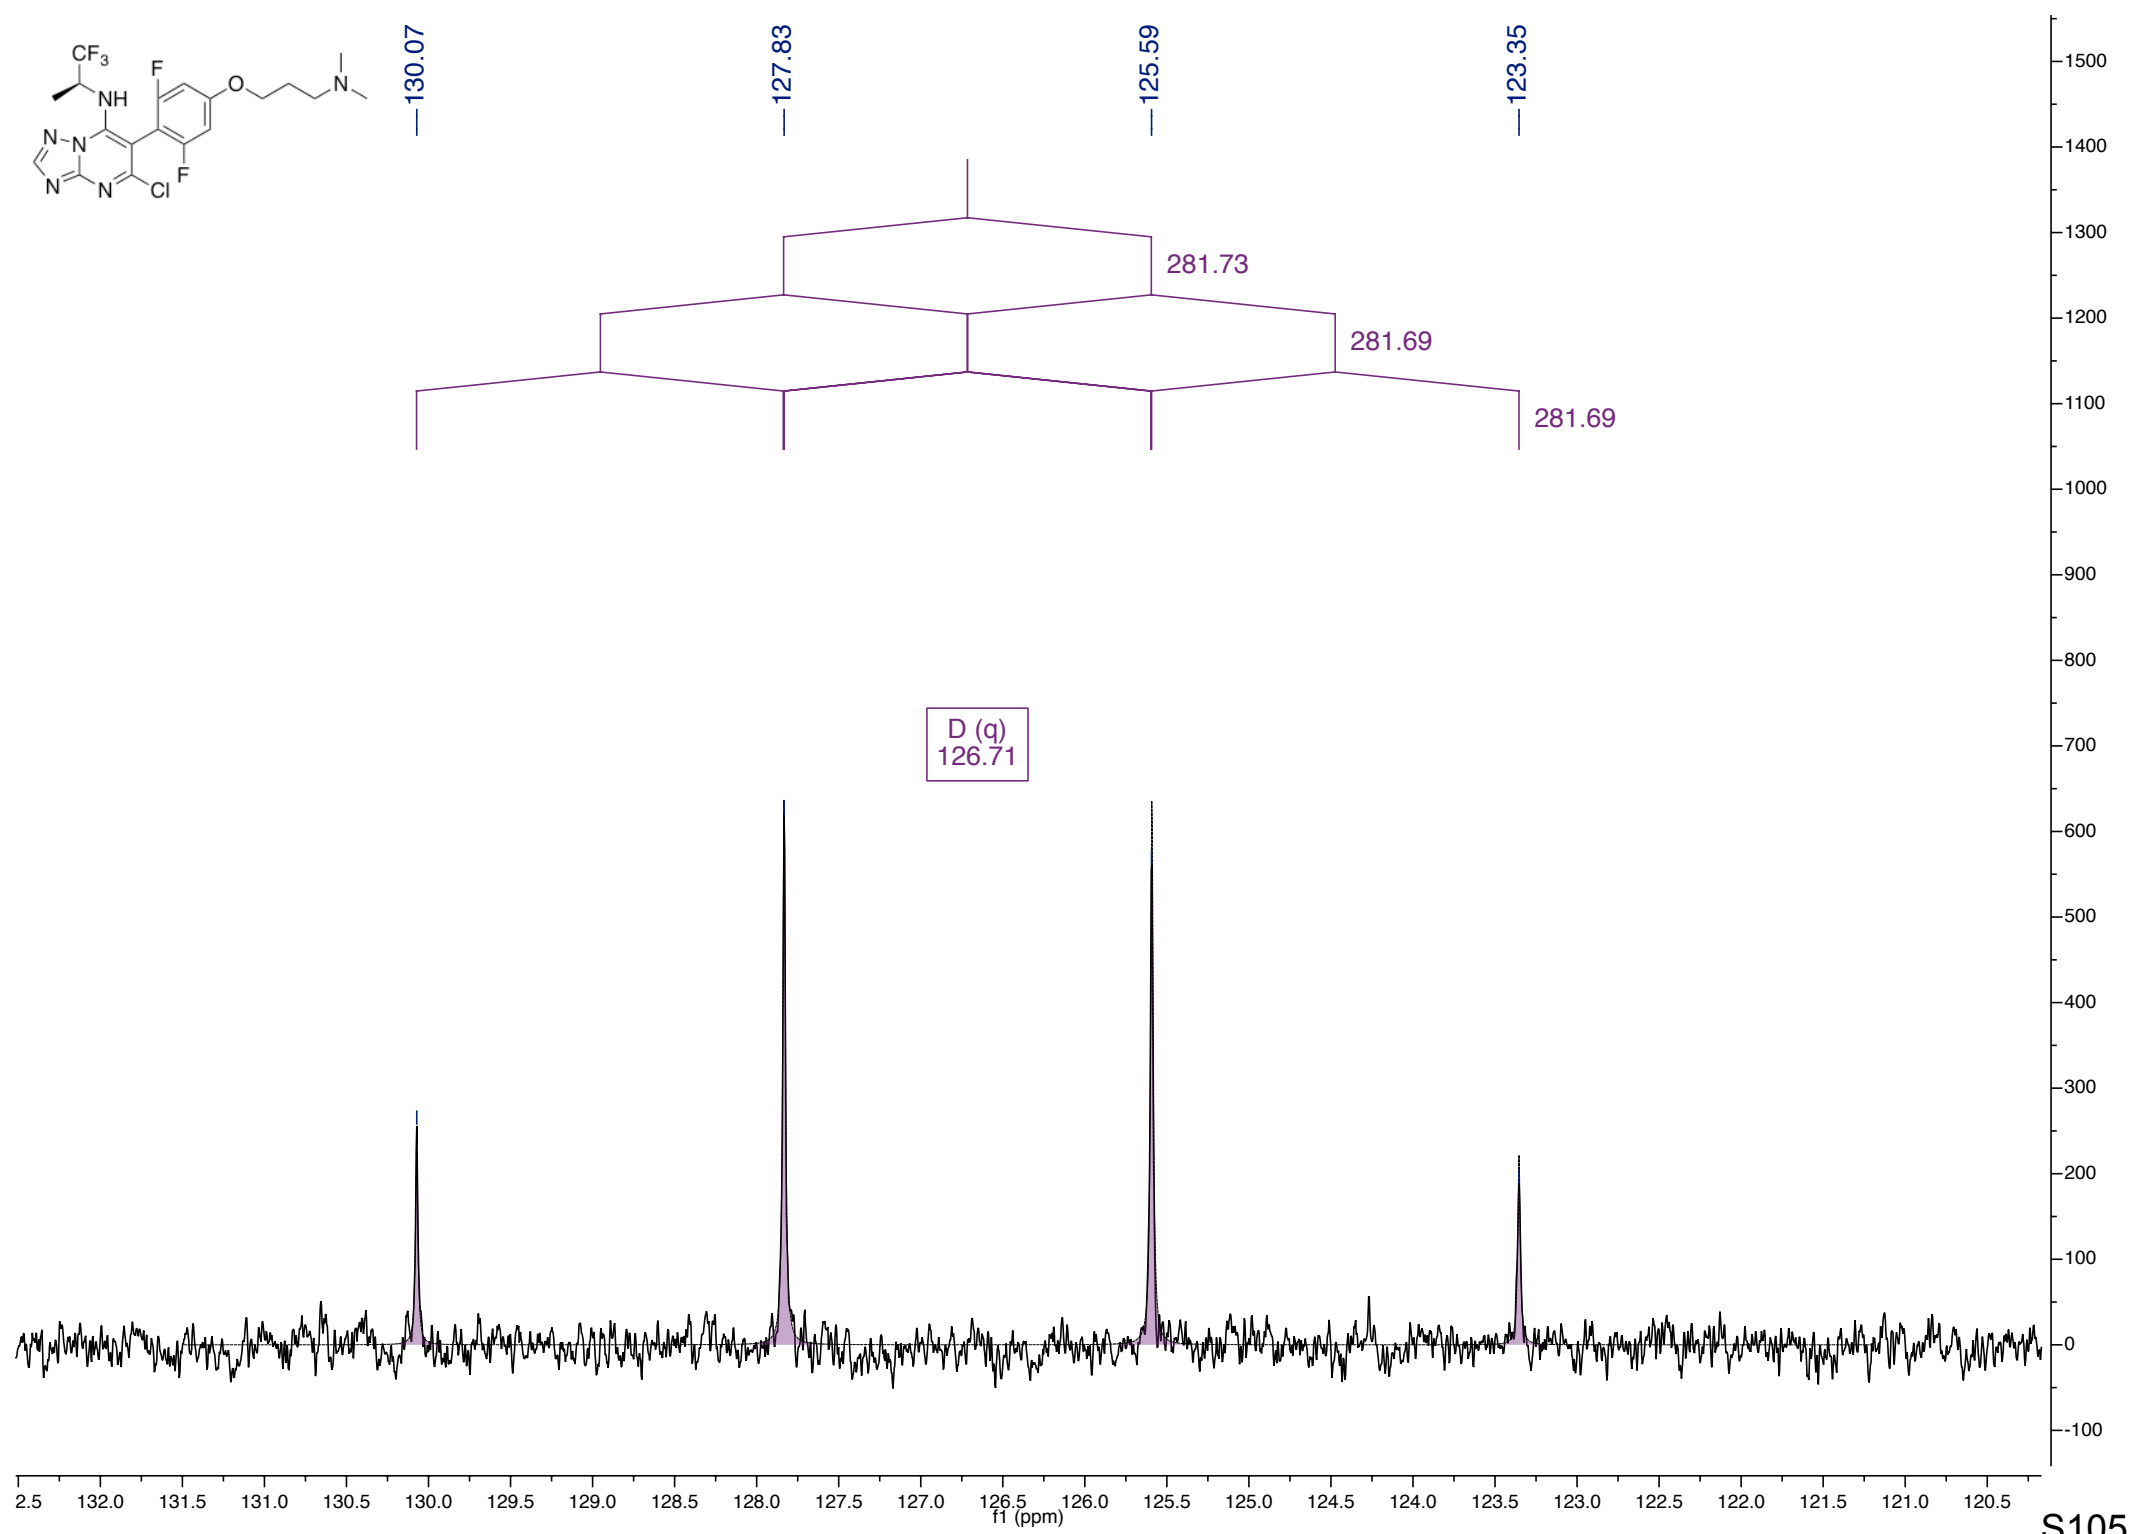

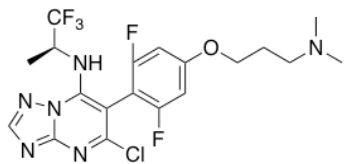

102.44  
102.28  
102.10

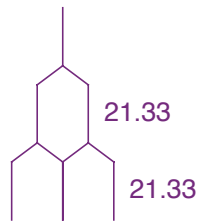

100.64  
100.61  
100.43  
100.41  
100.29  
100.27  
100.09  
100.06

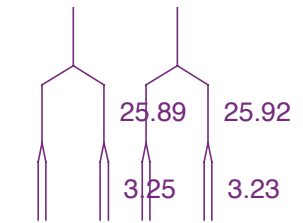

E (t)  
102.27

F (dd)  
100.52

G (dd)  
100.18

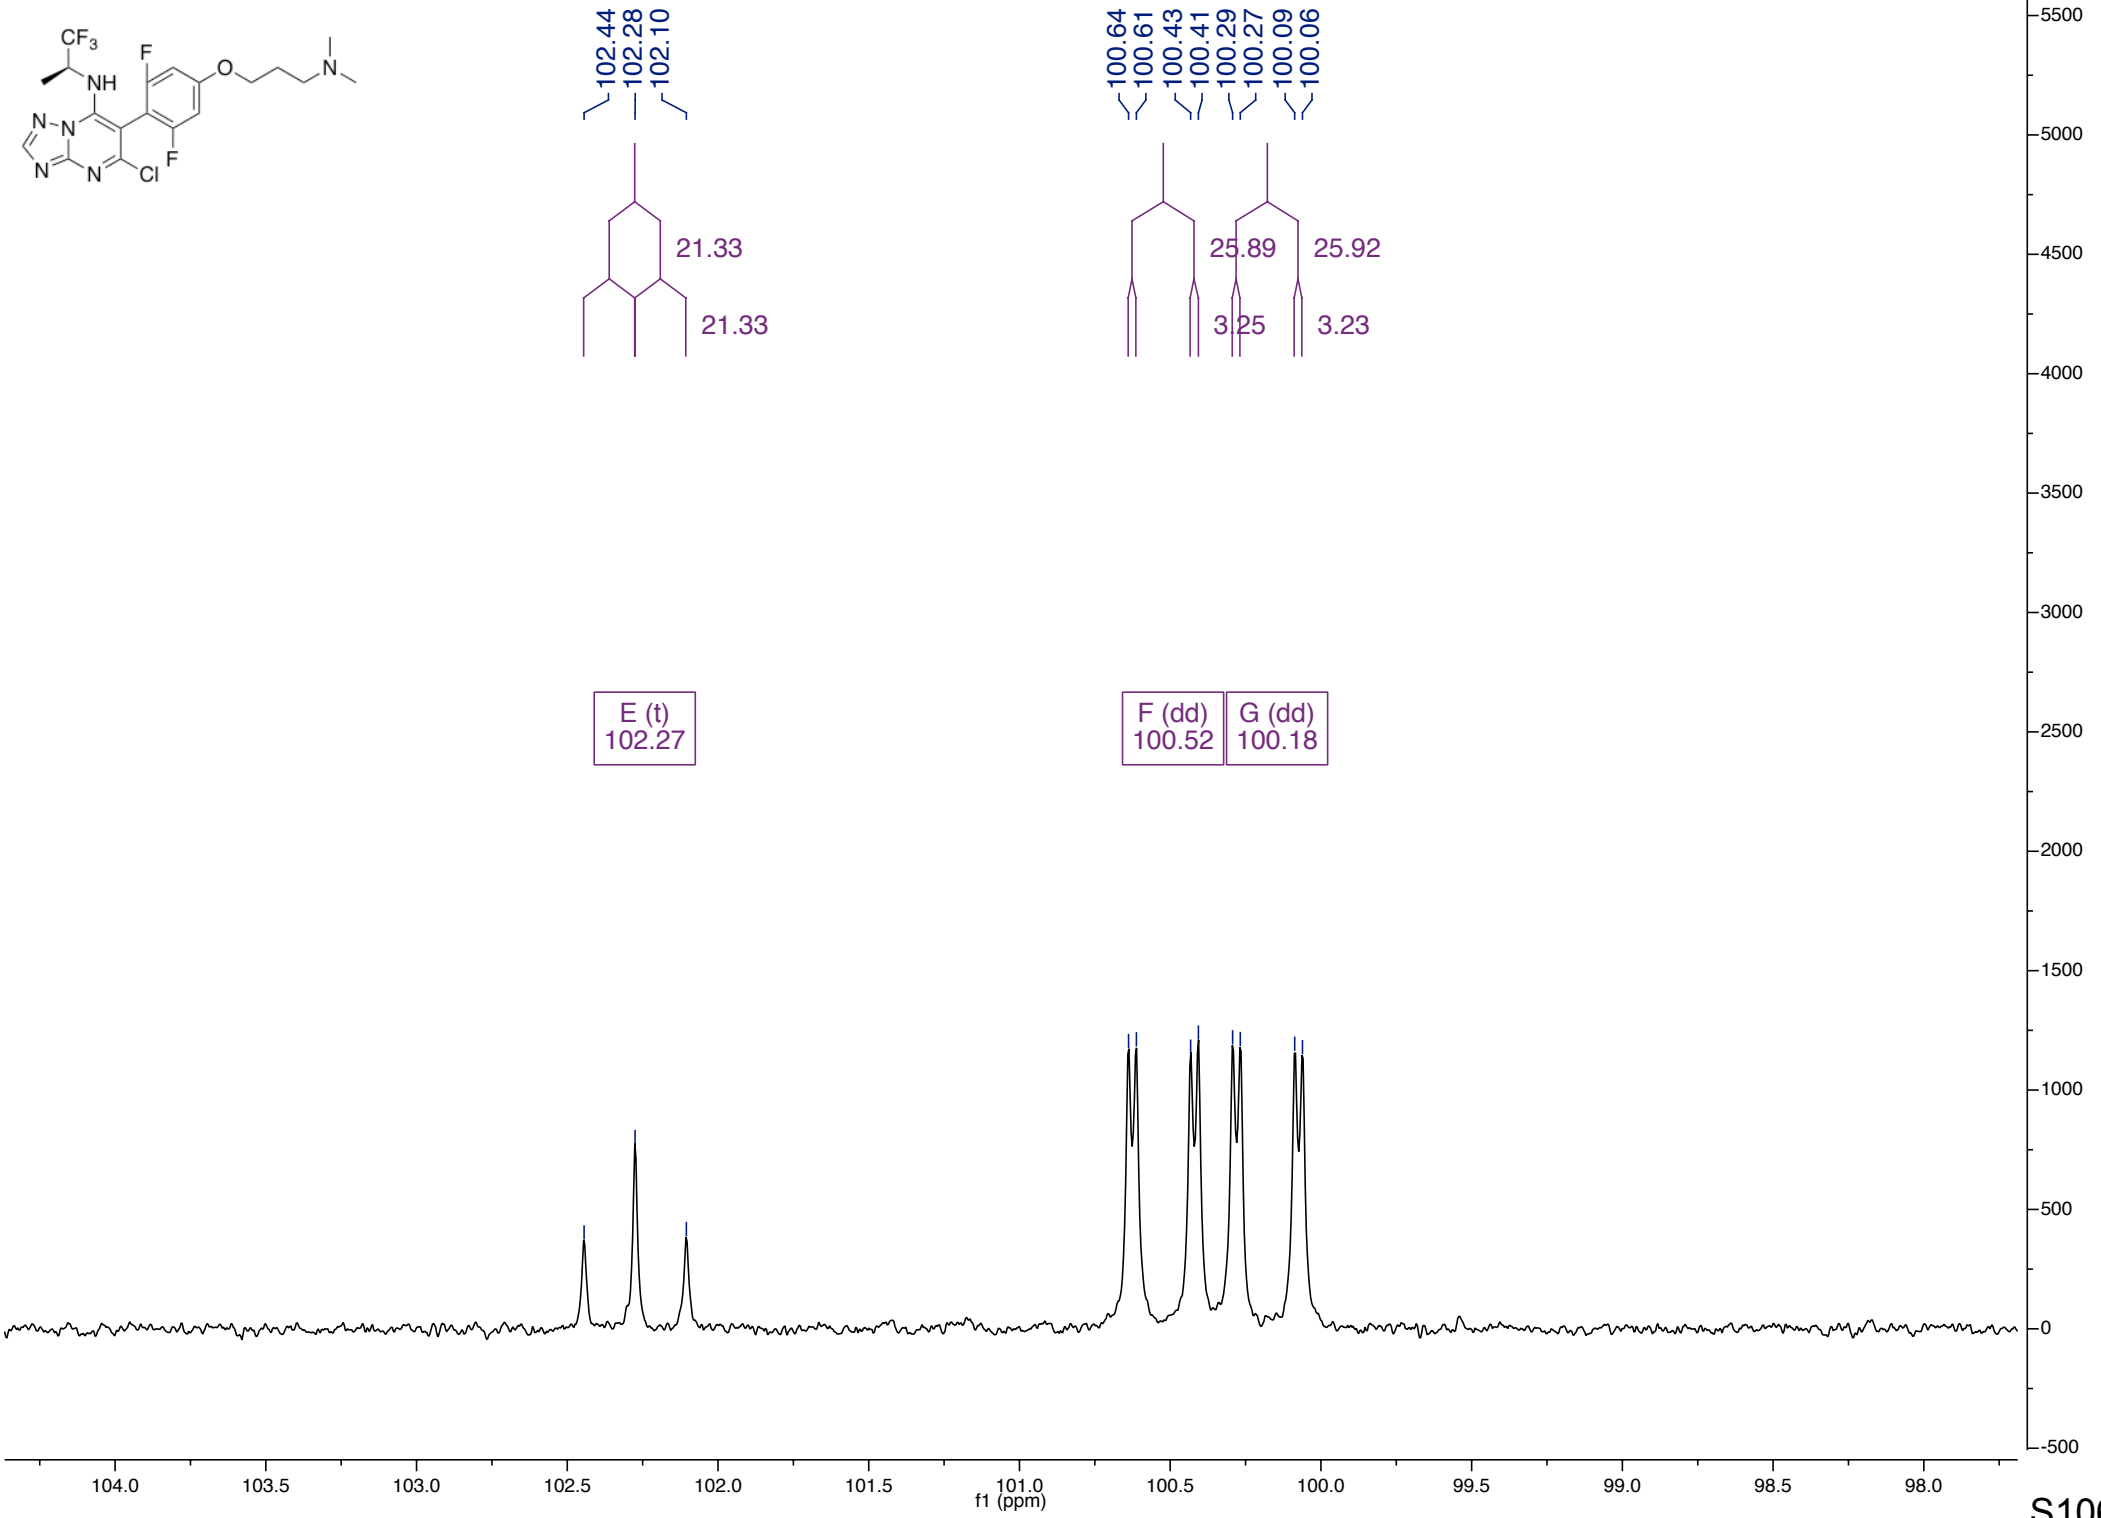

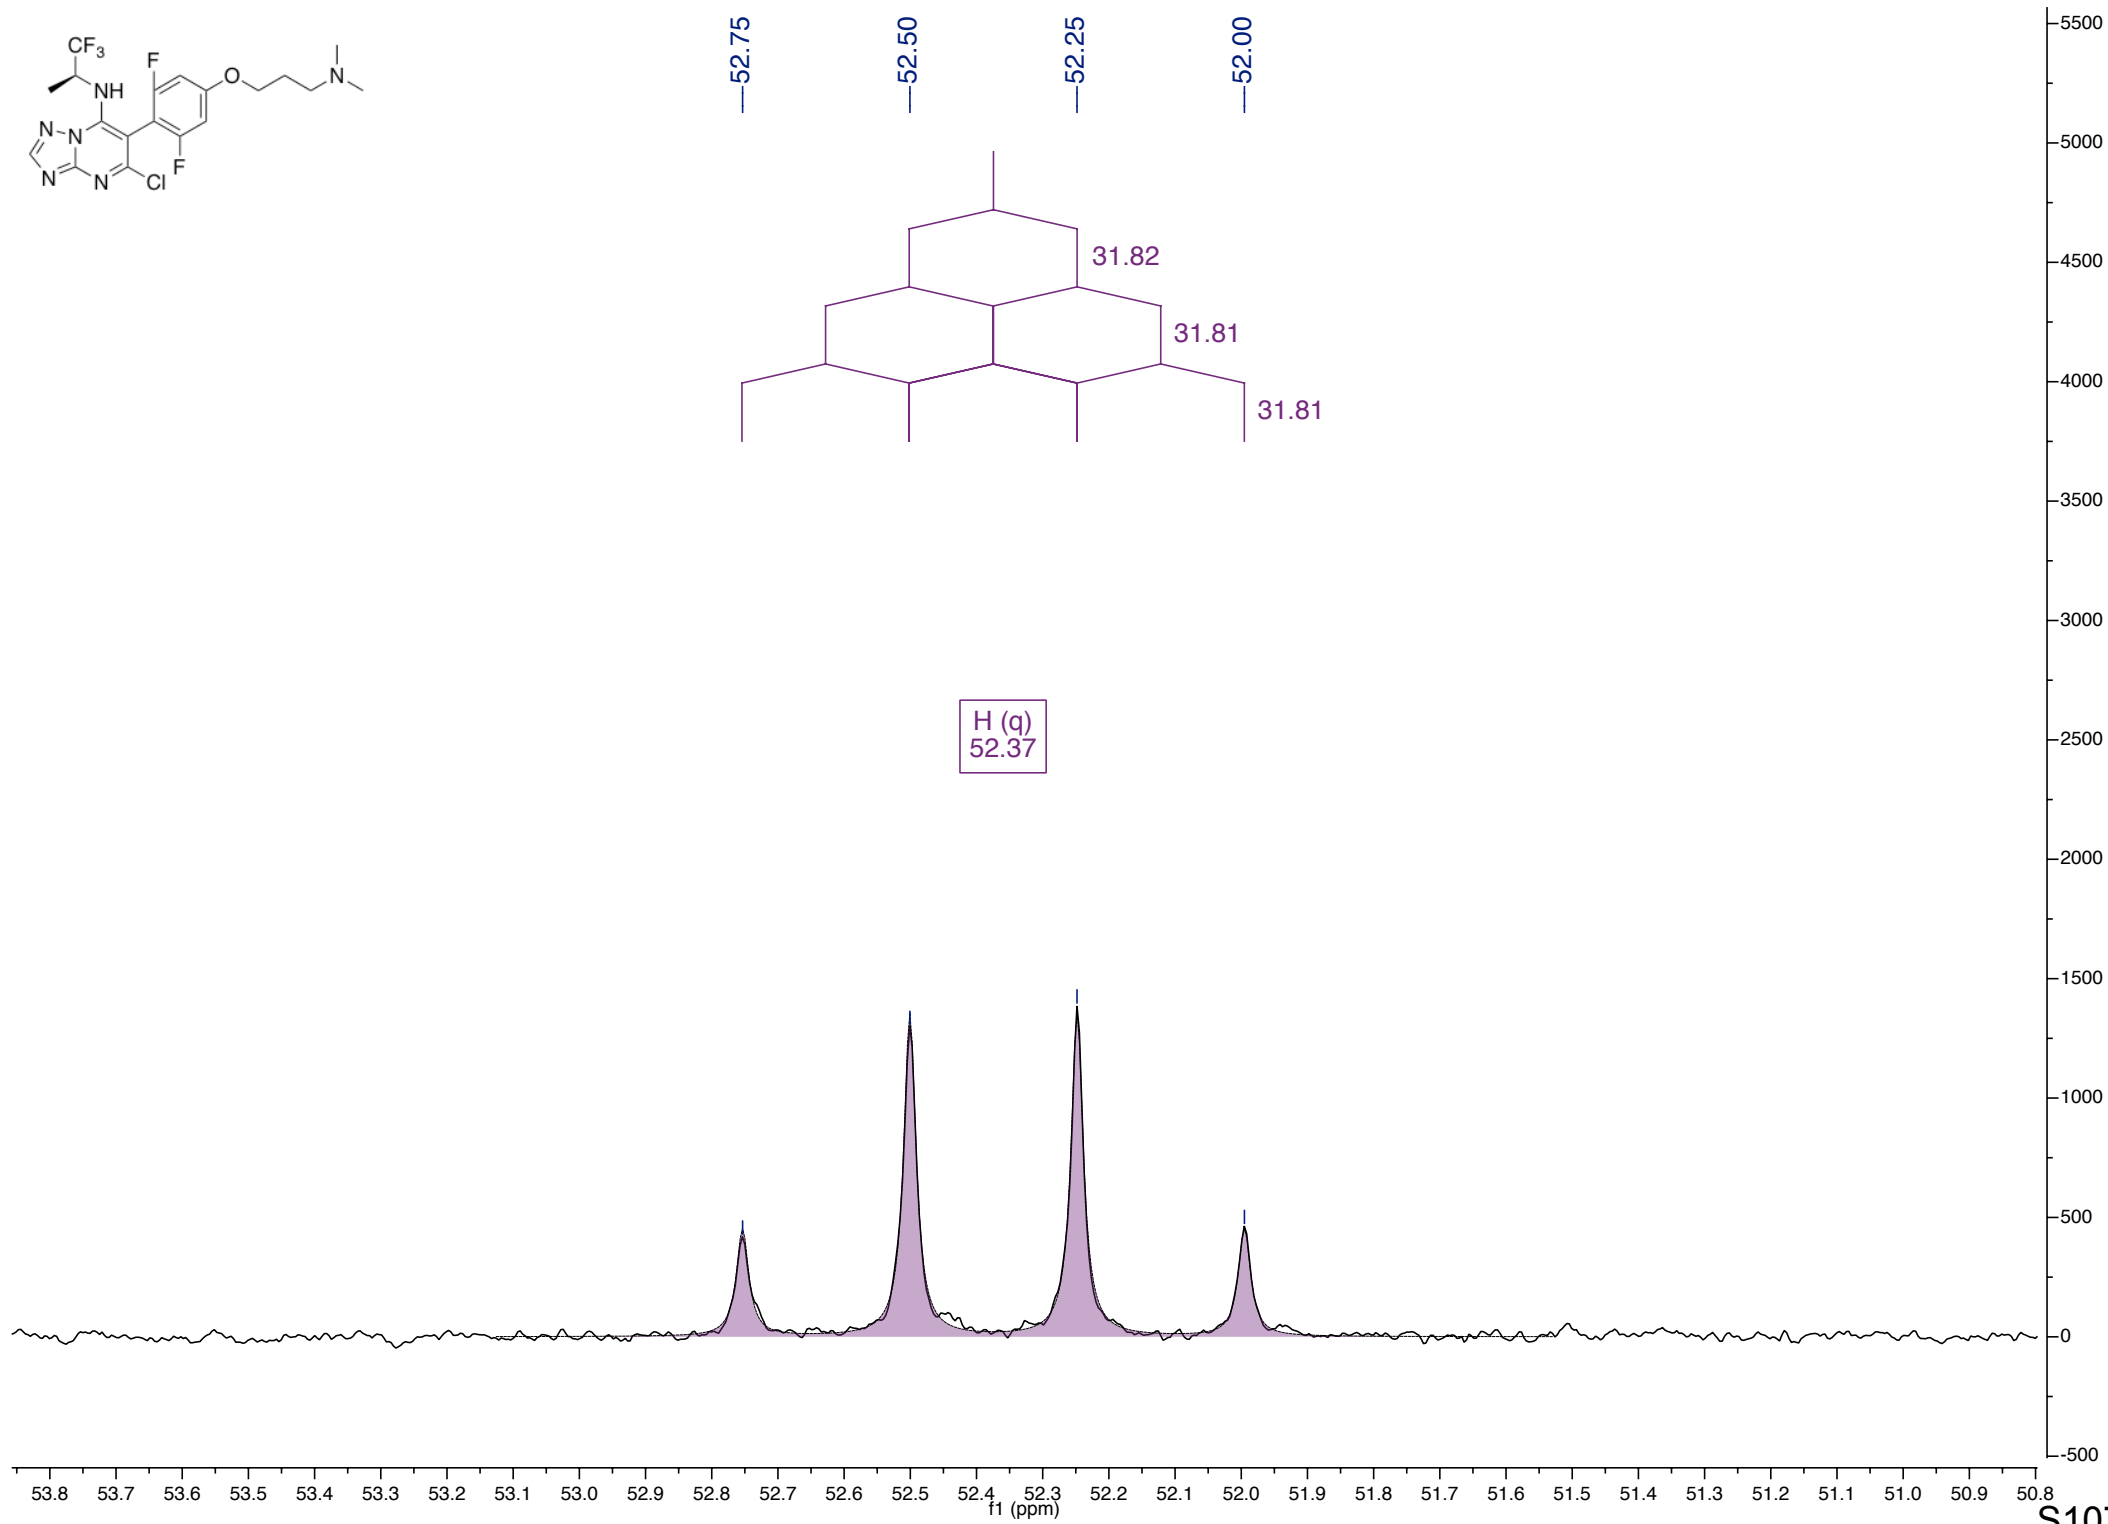

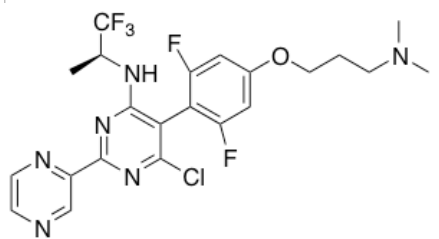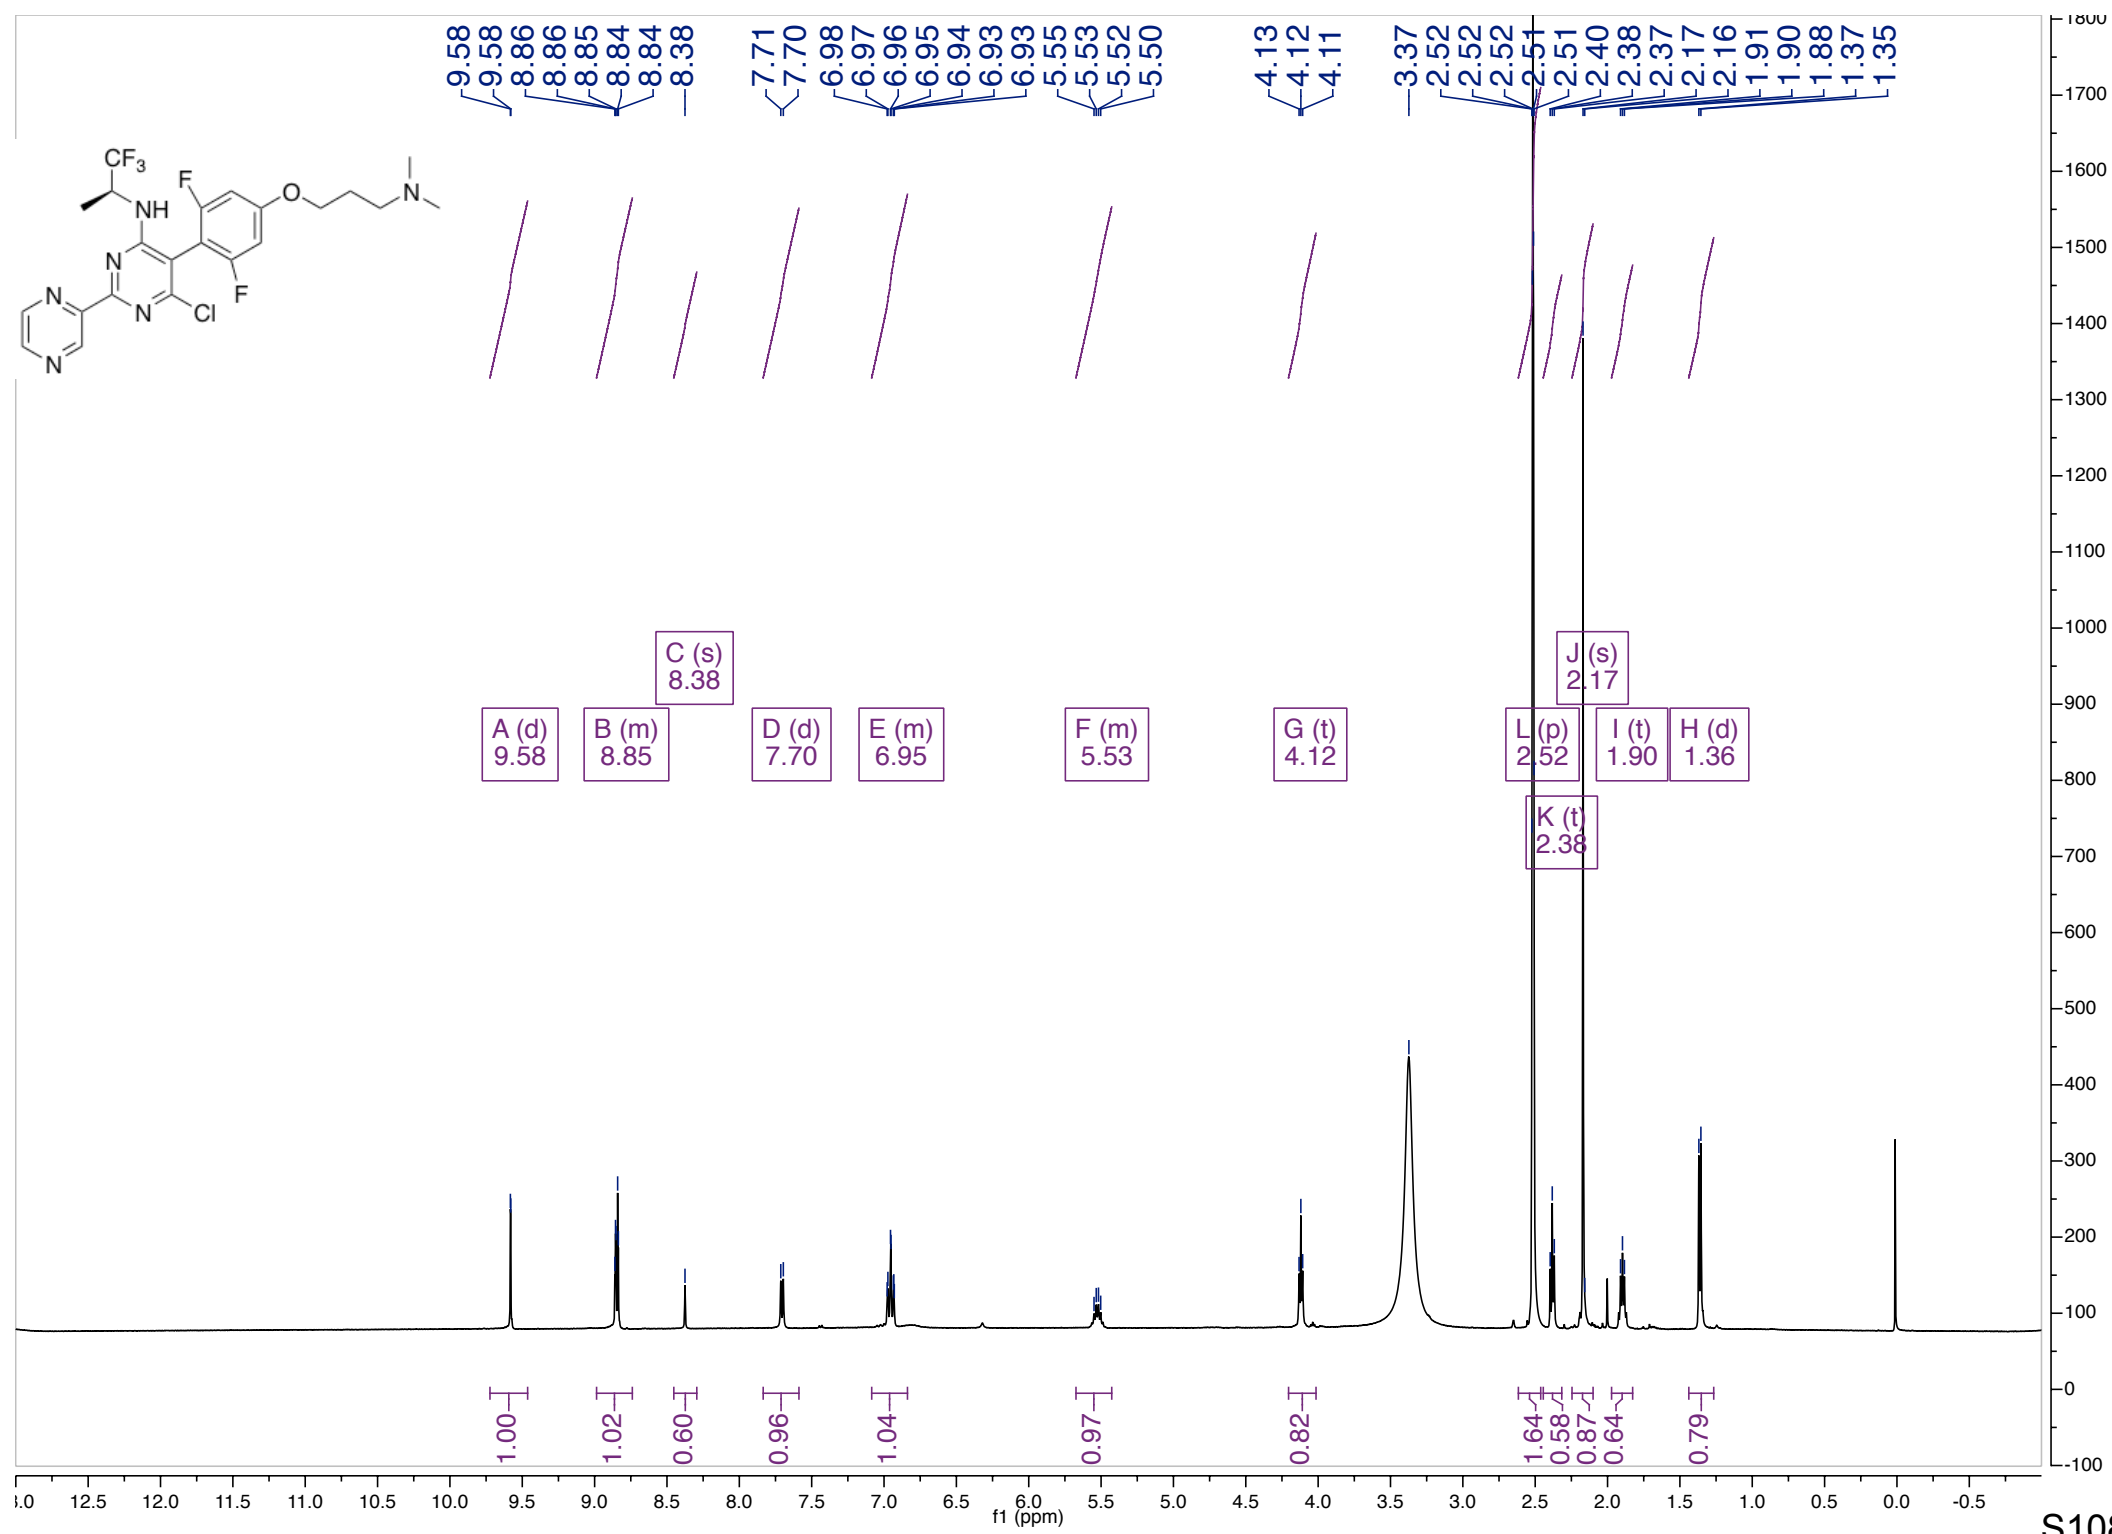

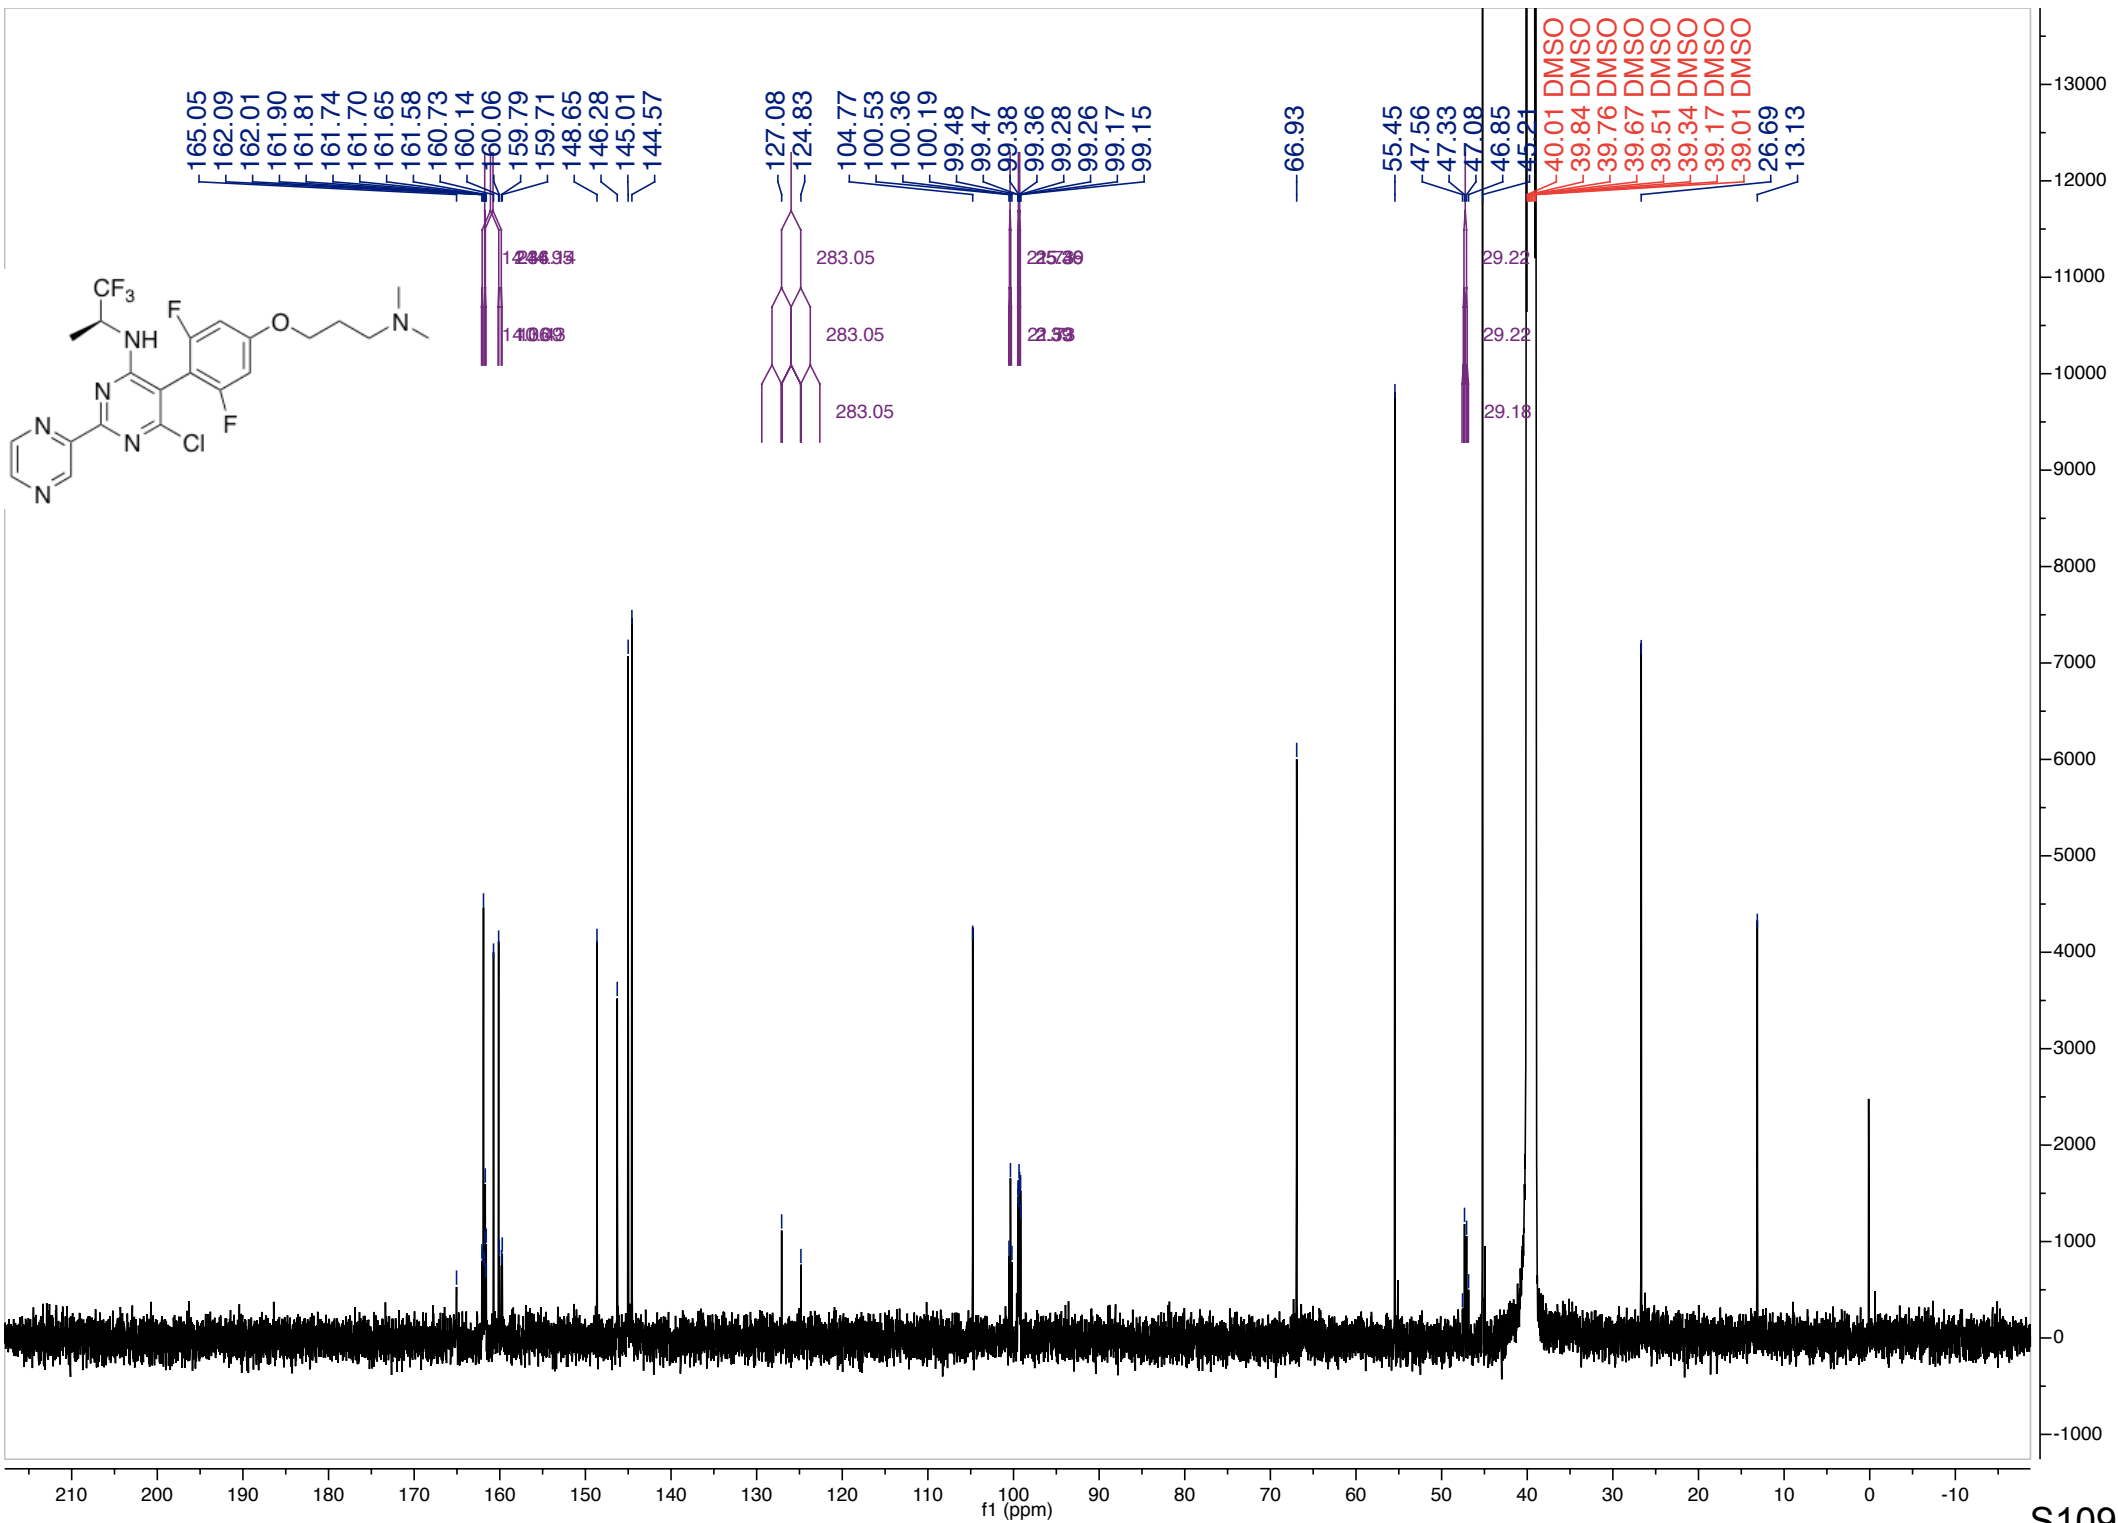

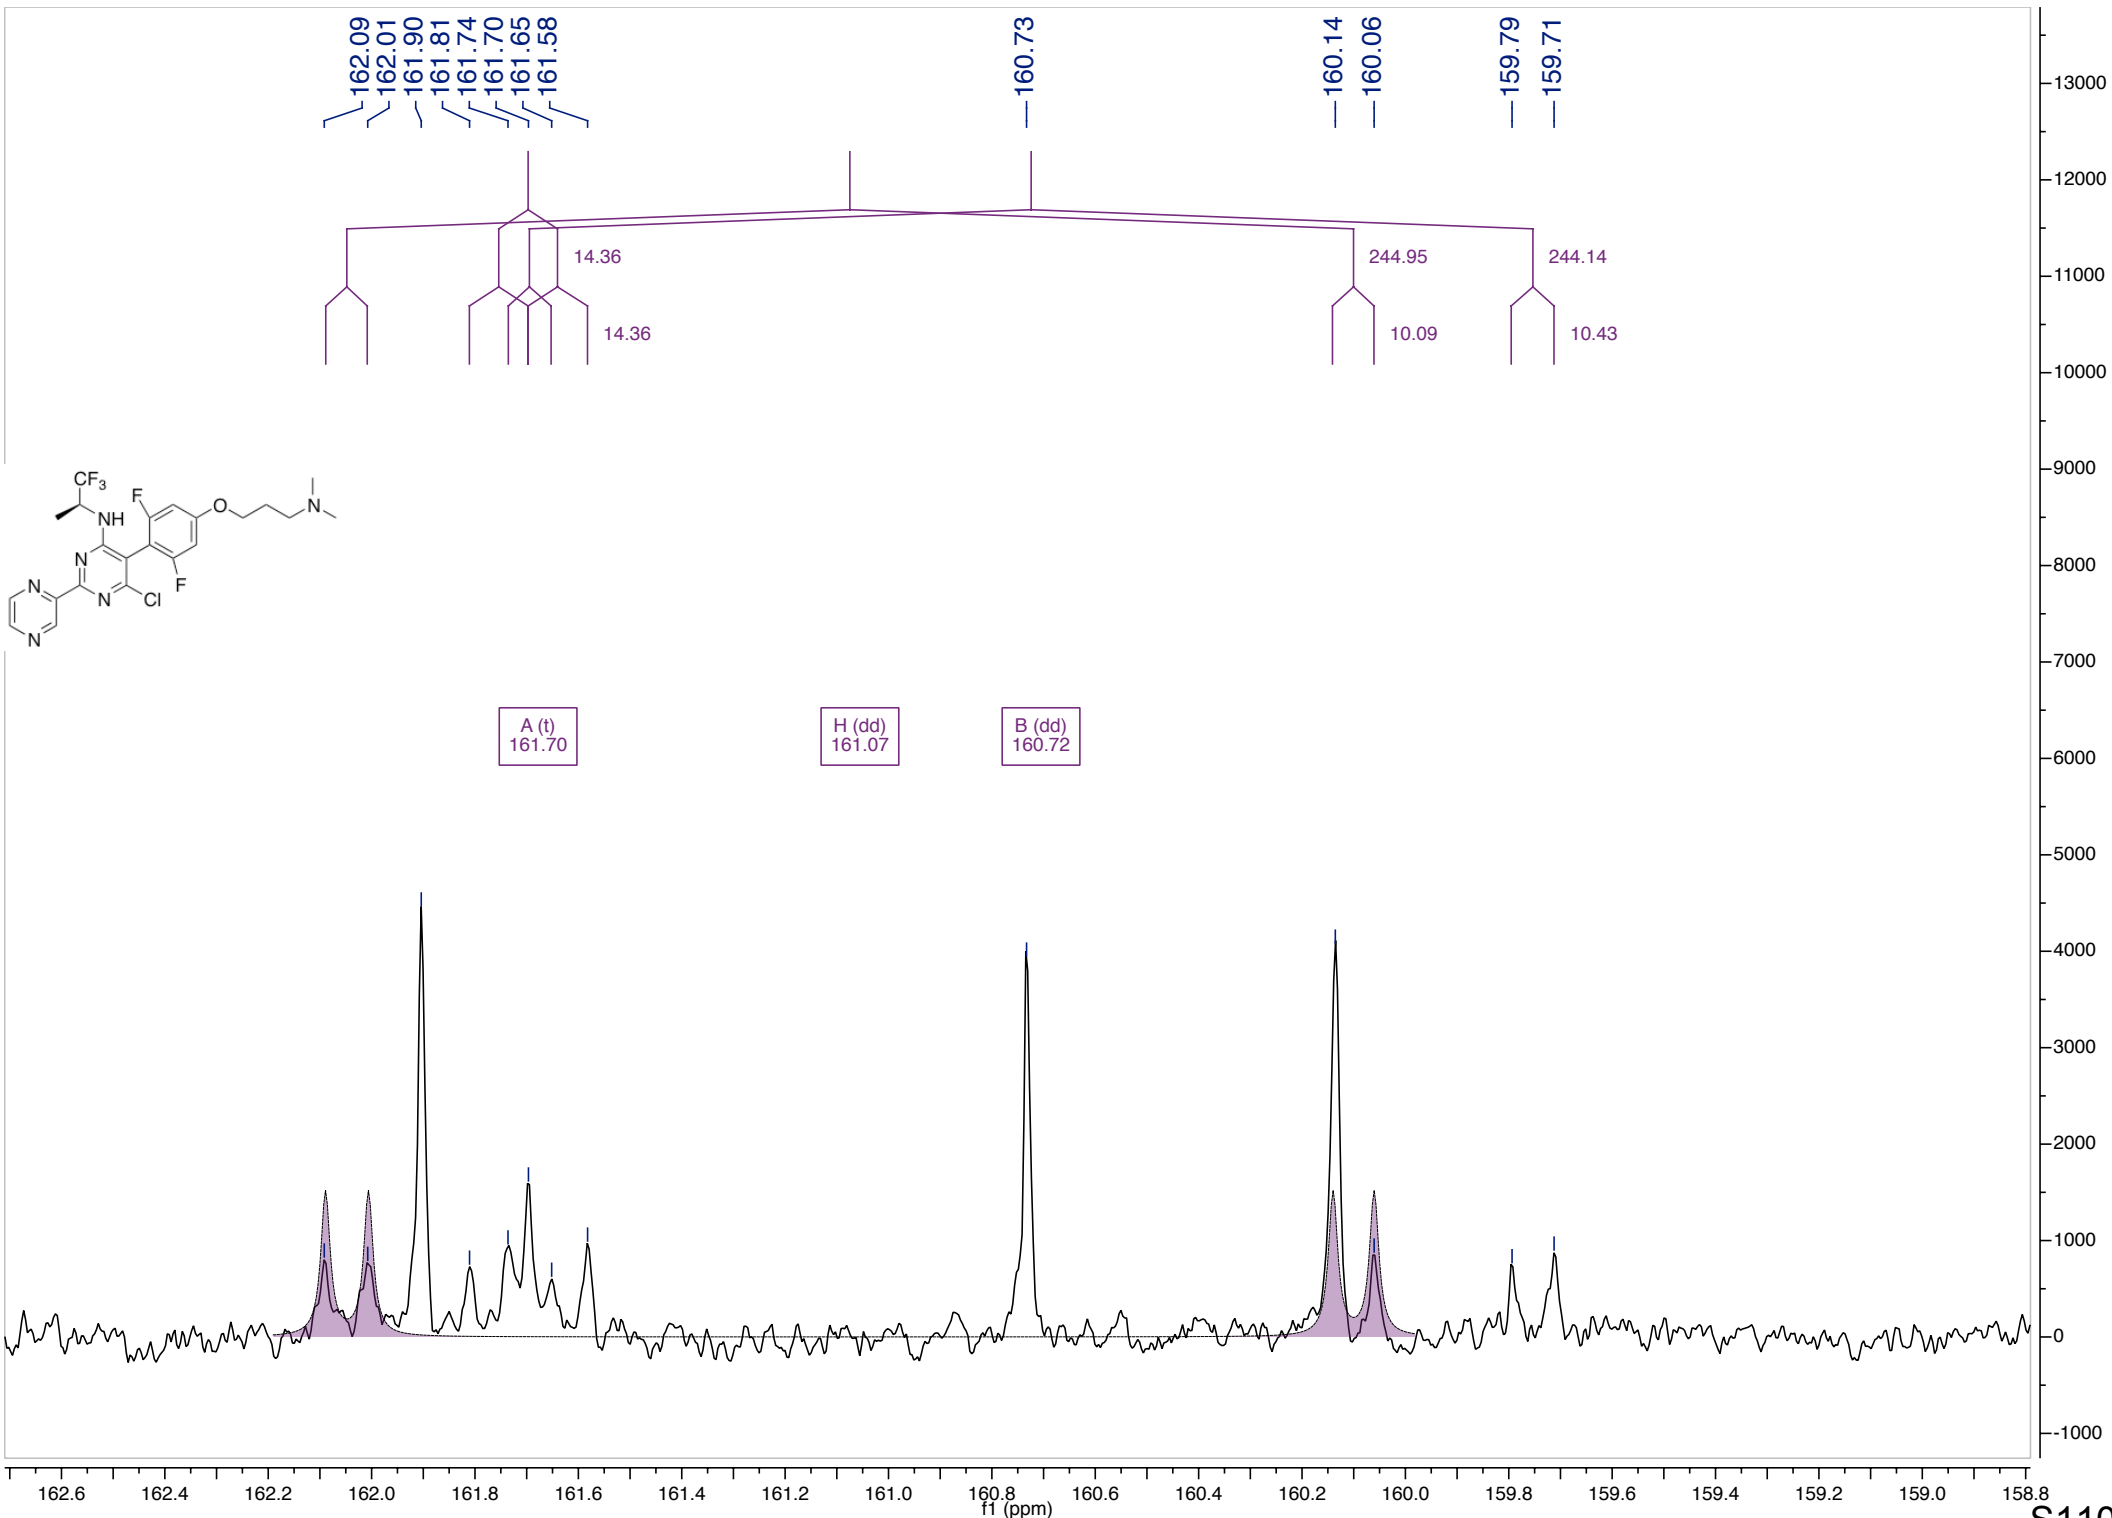

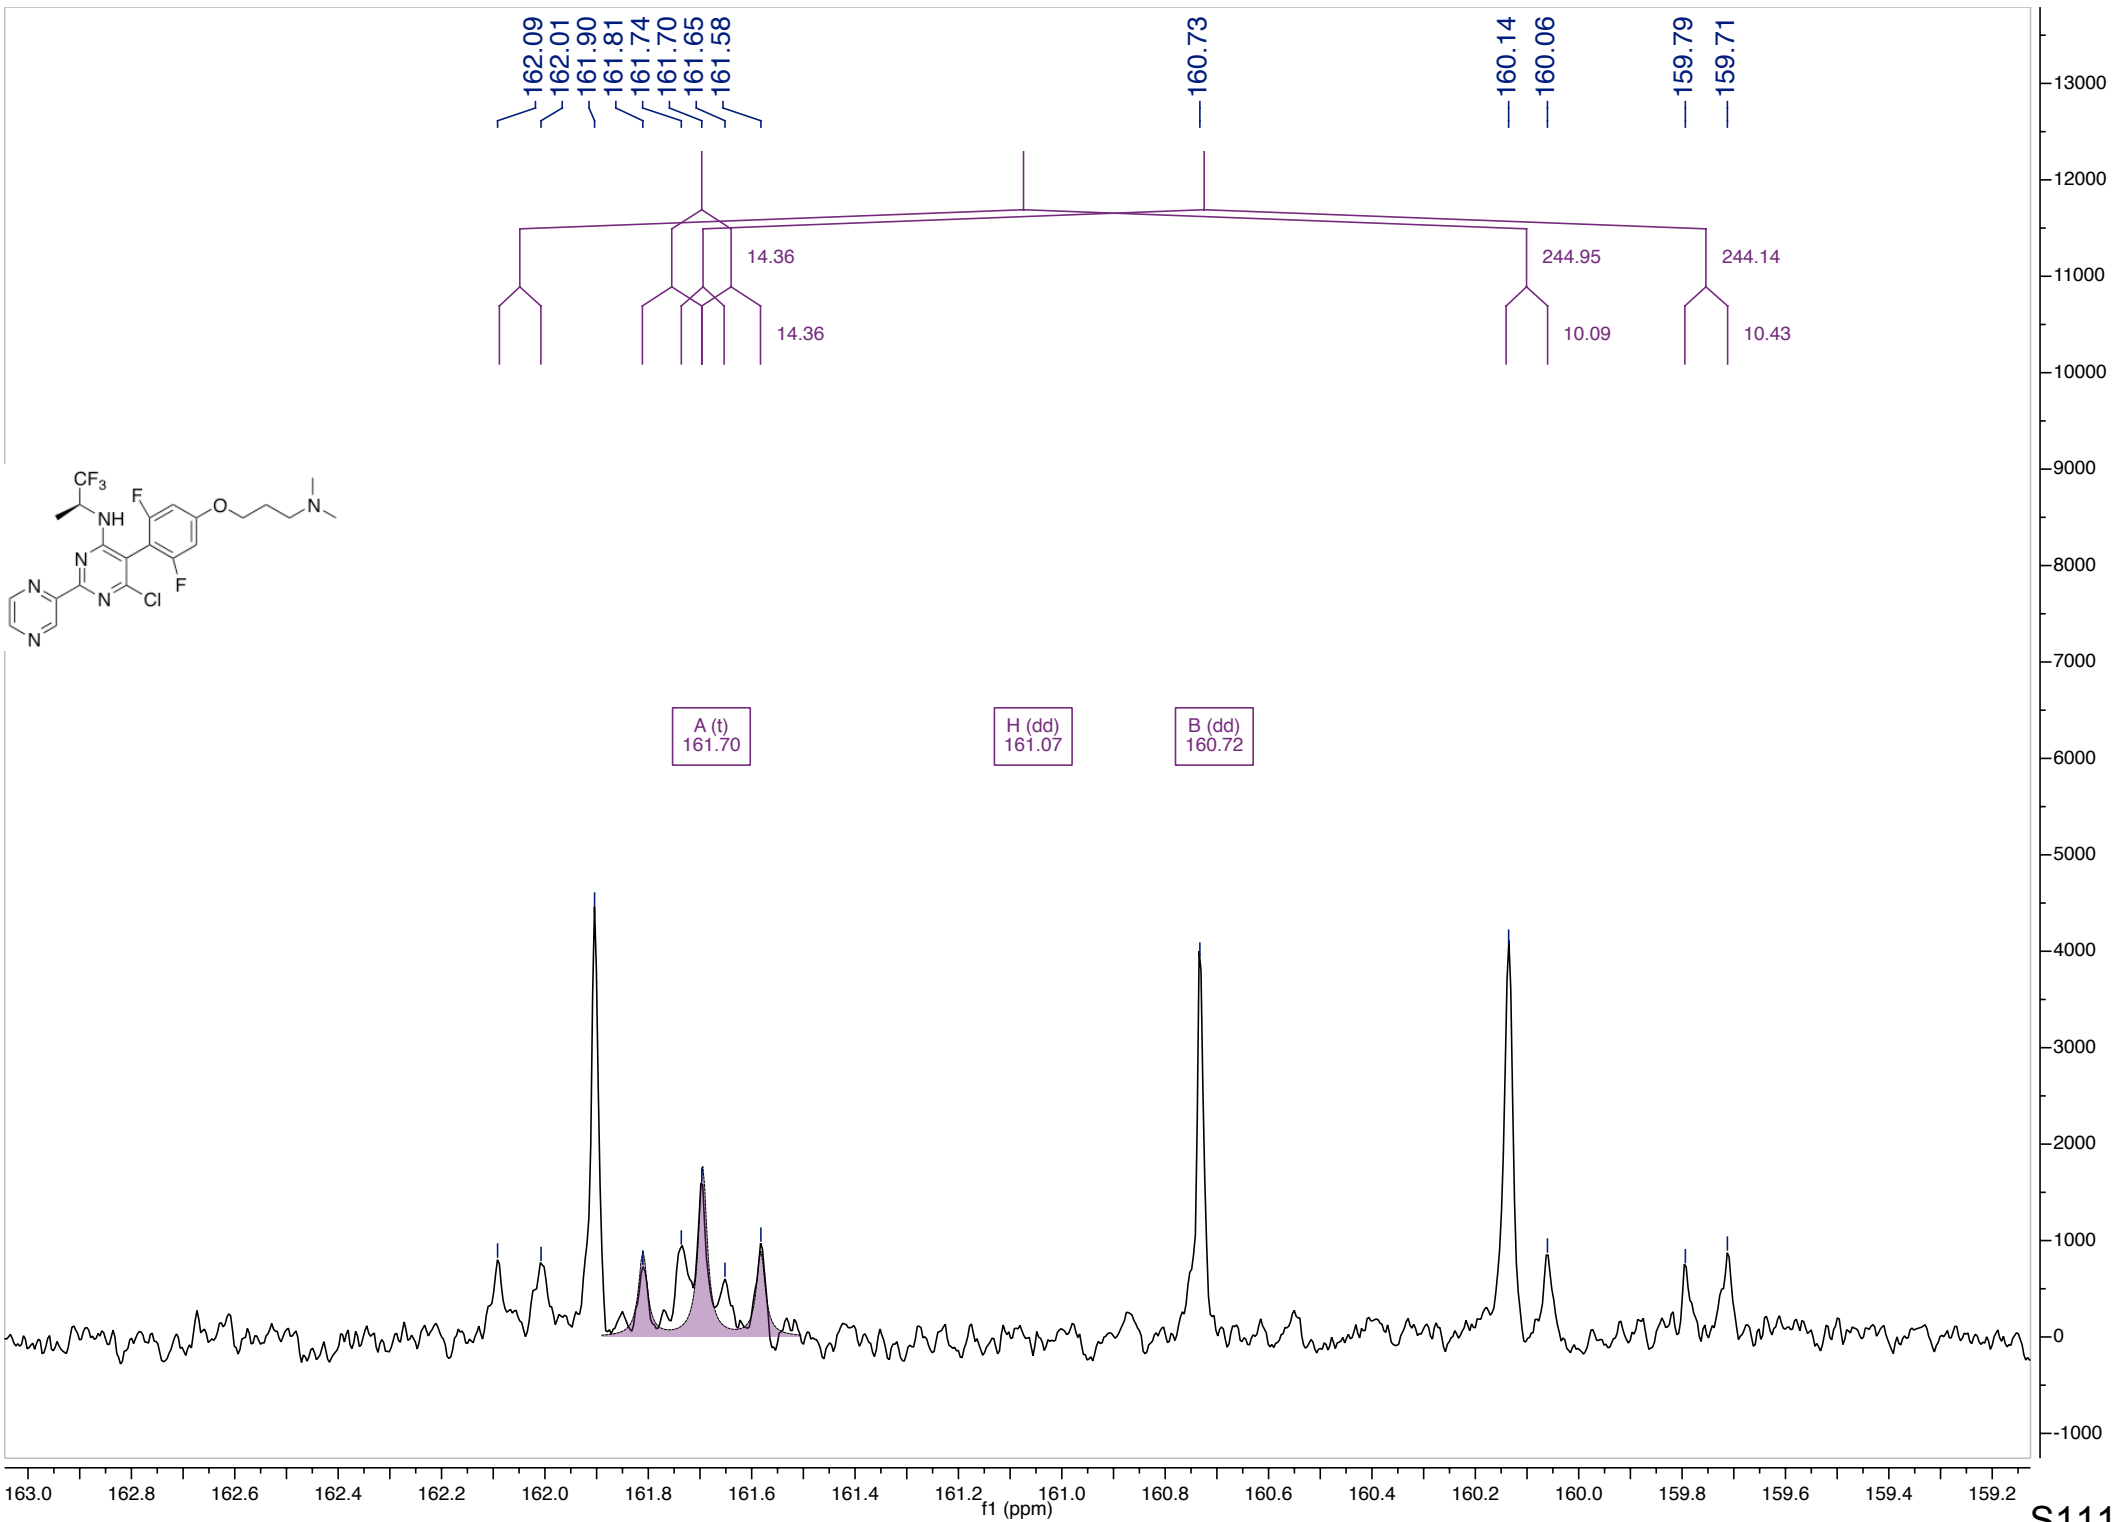

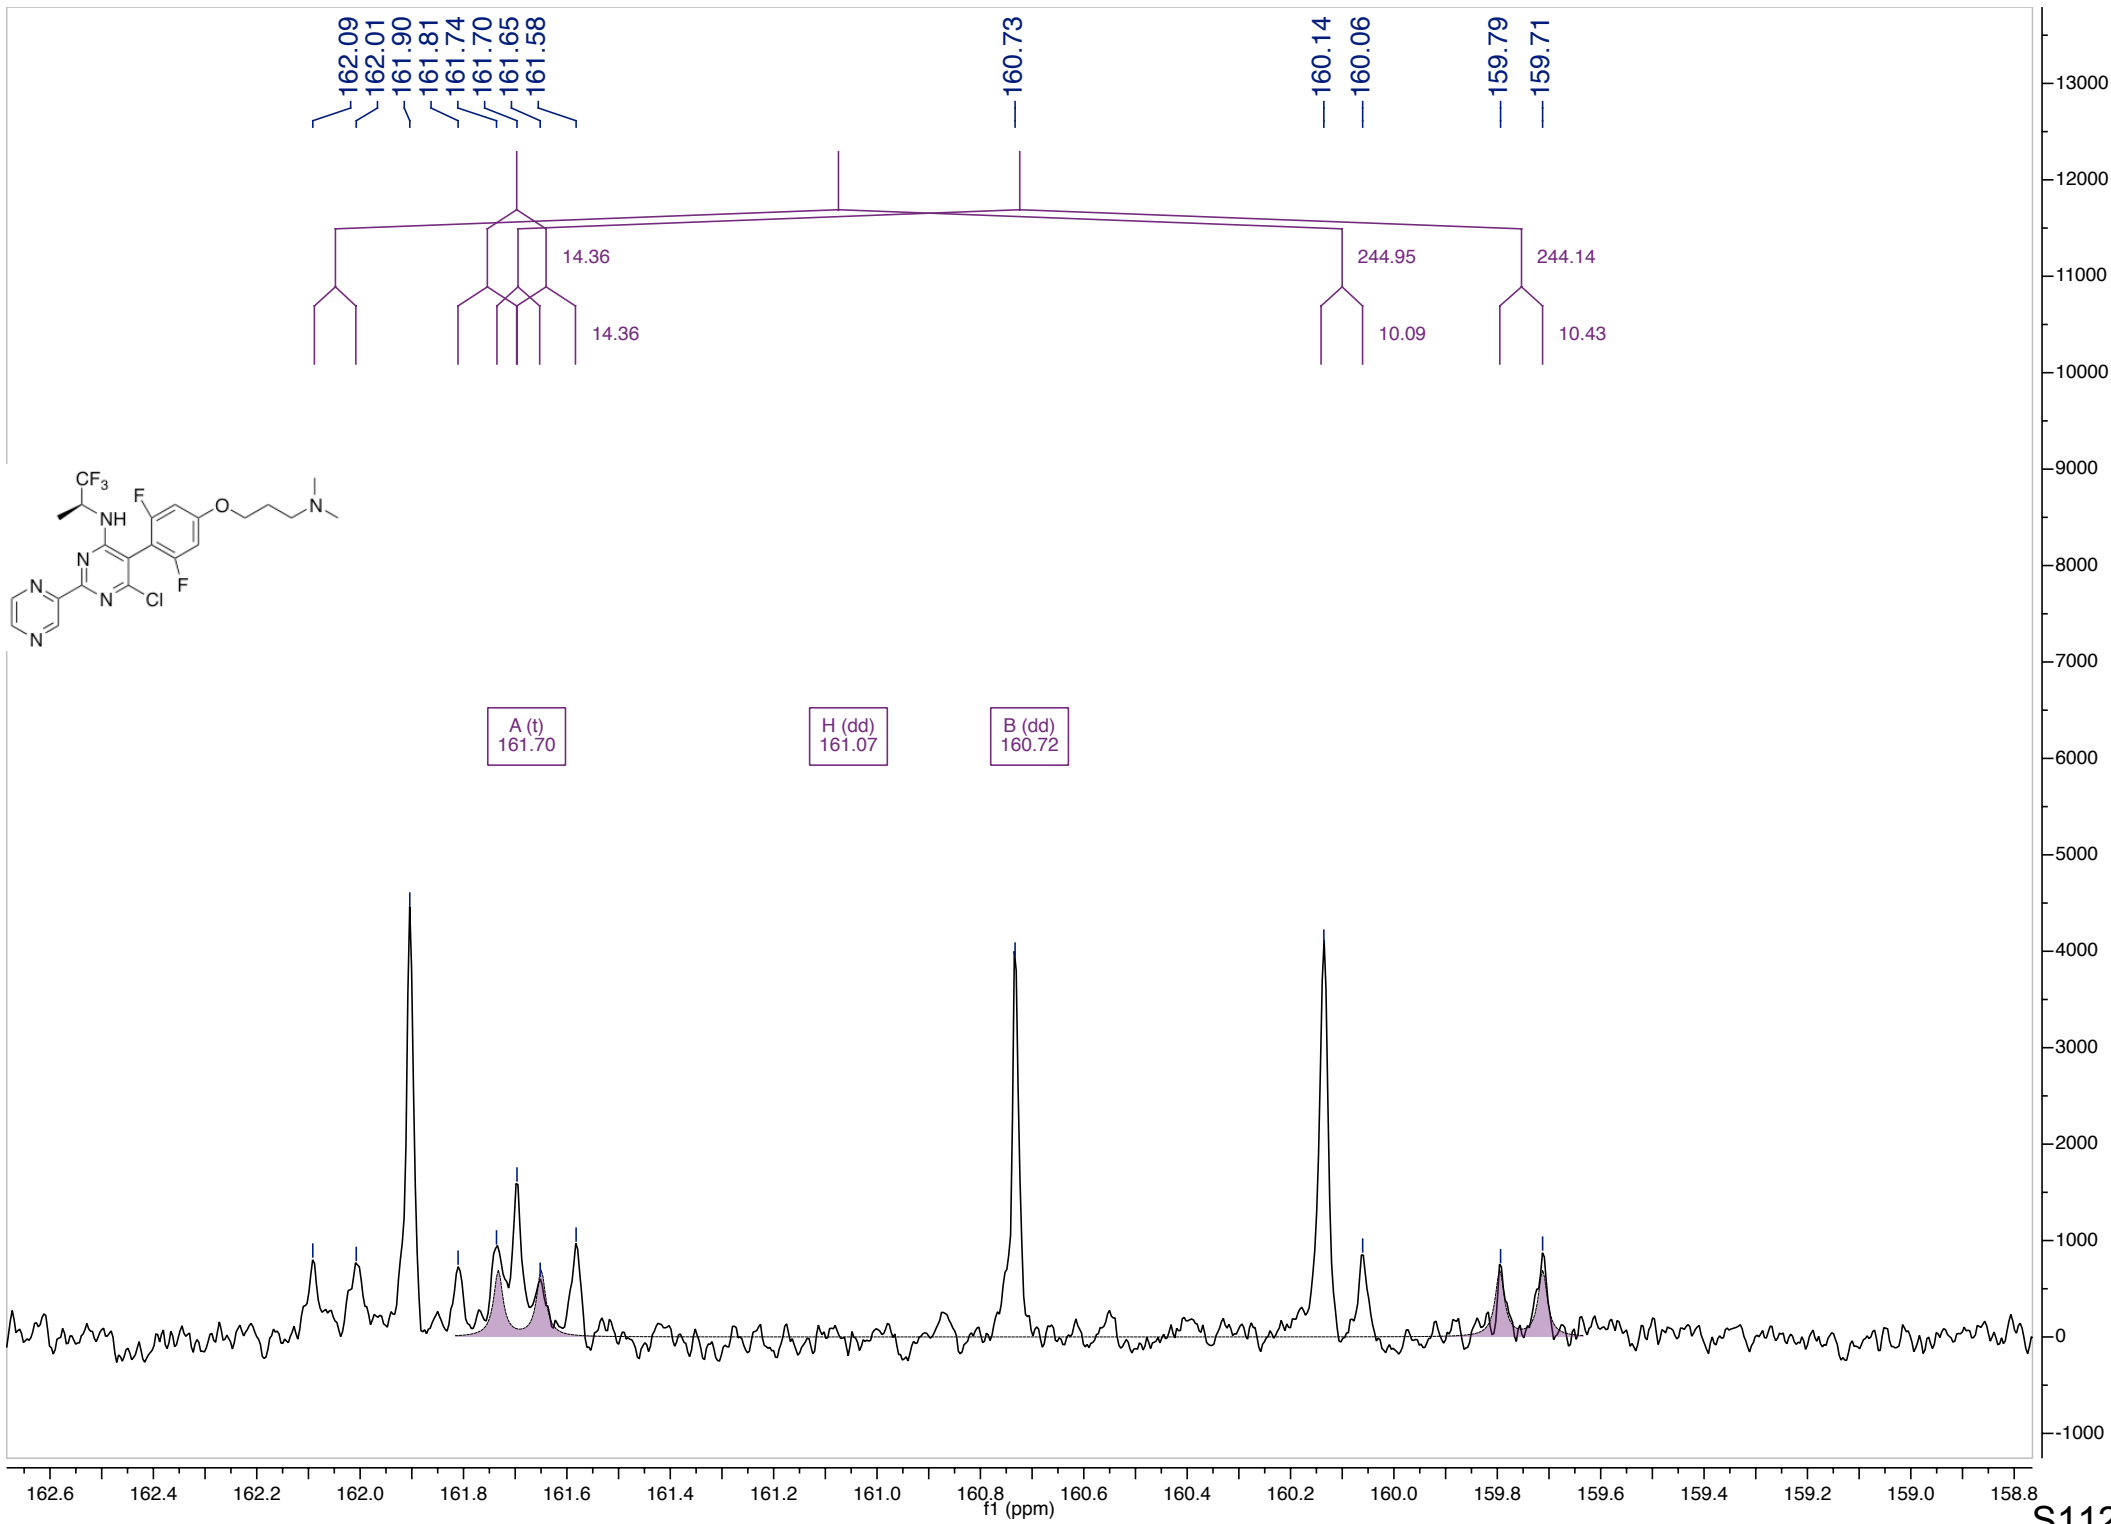



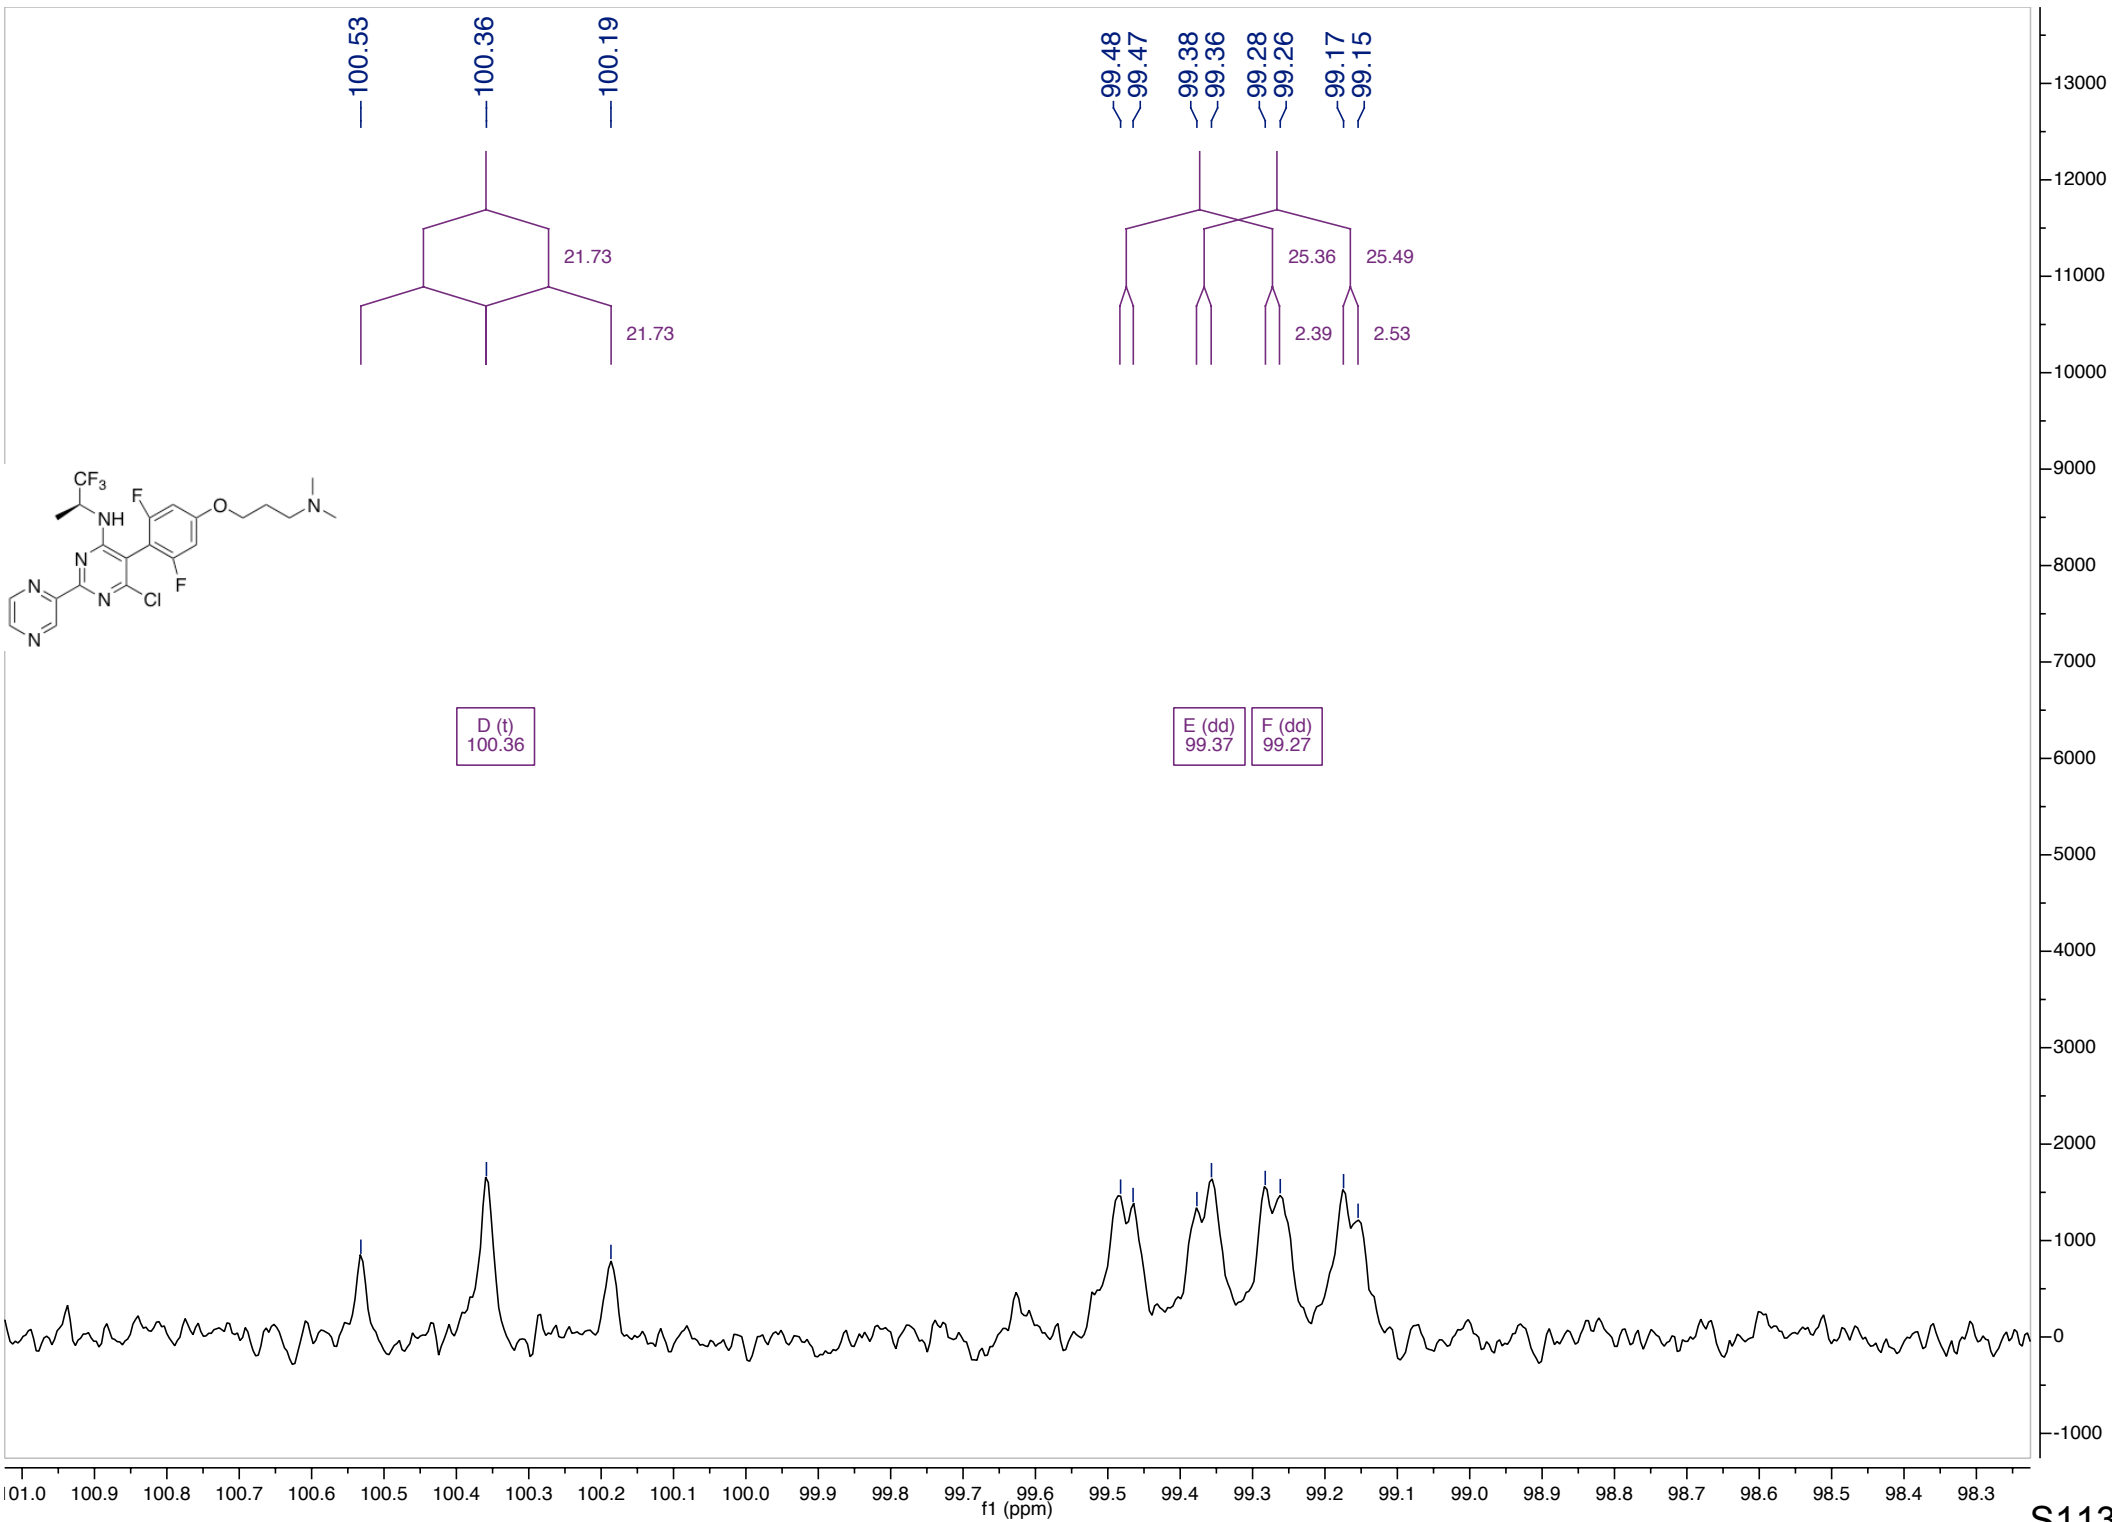

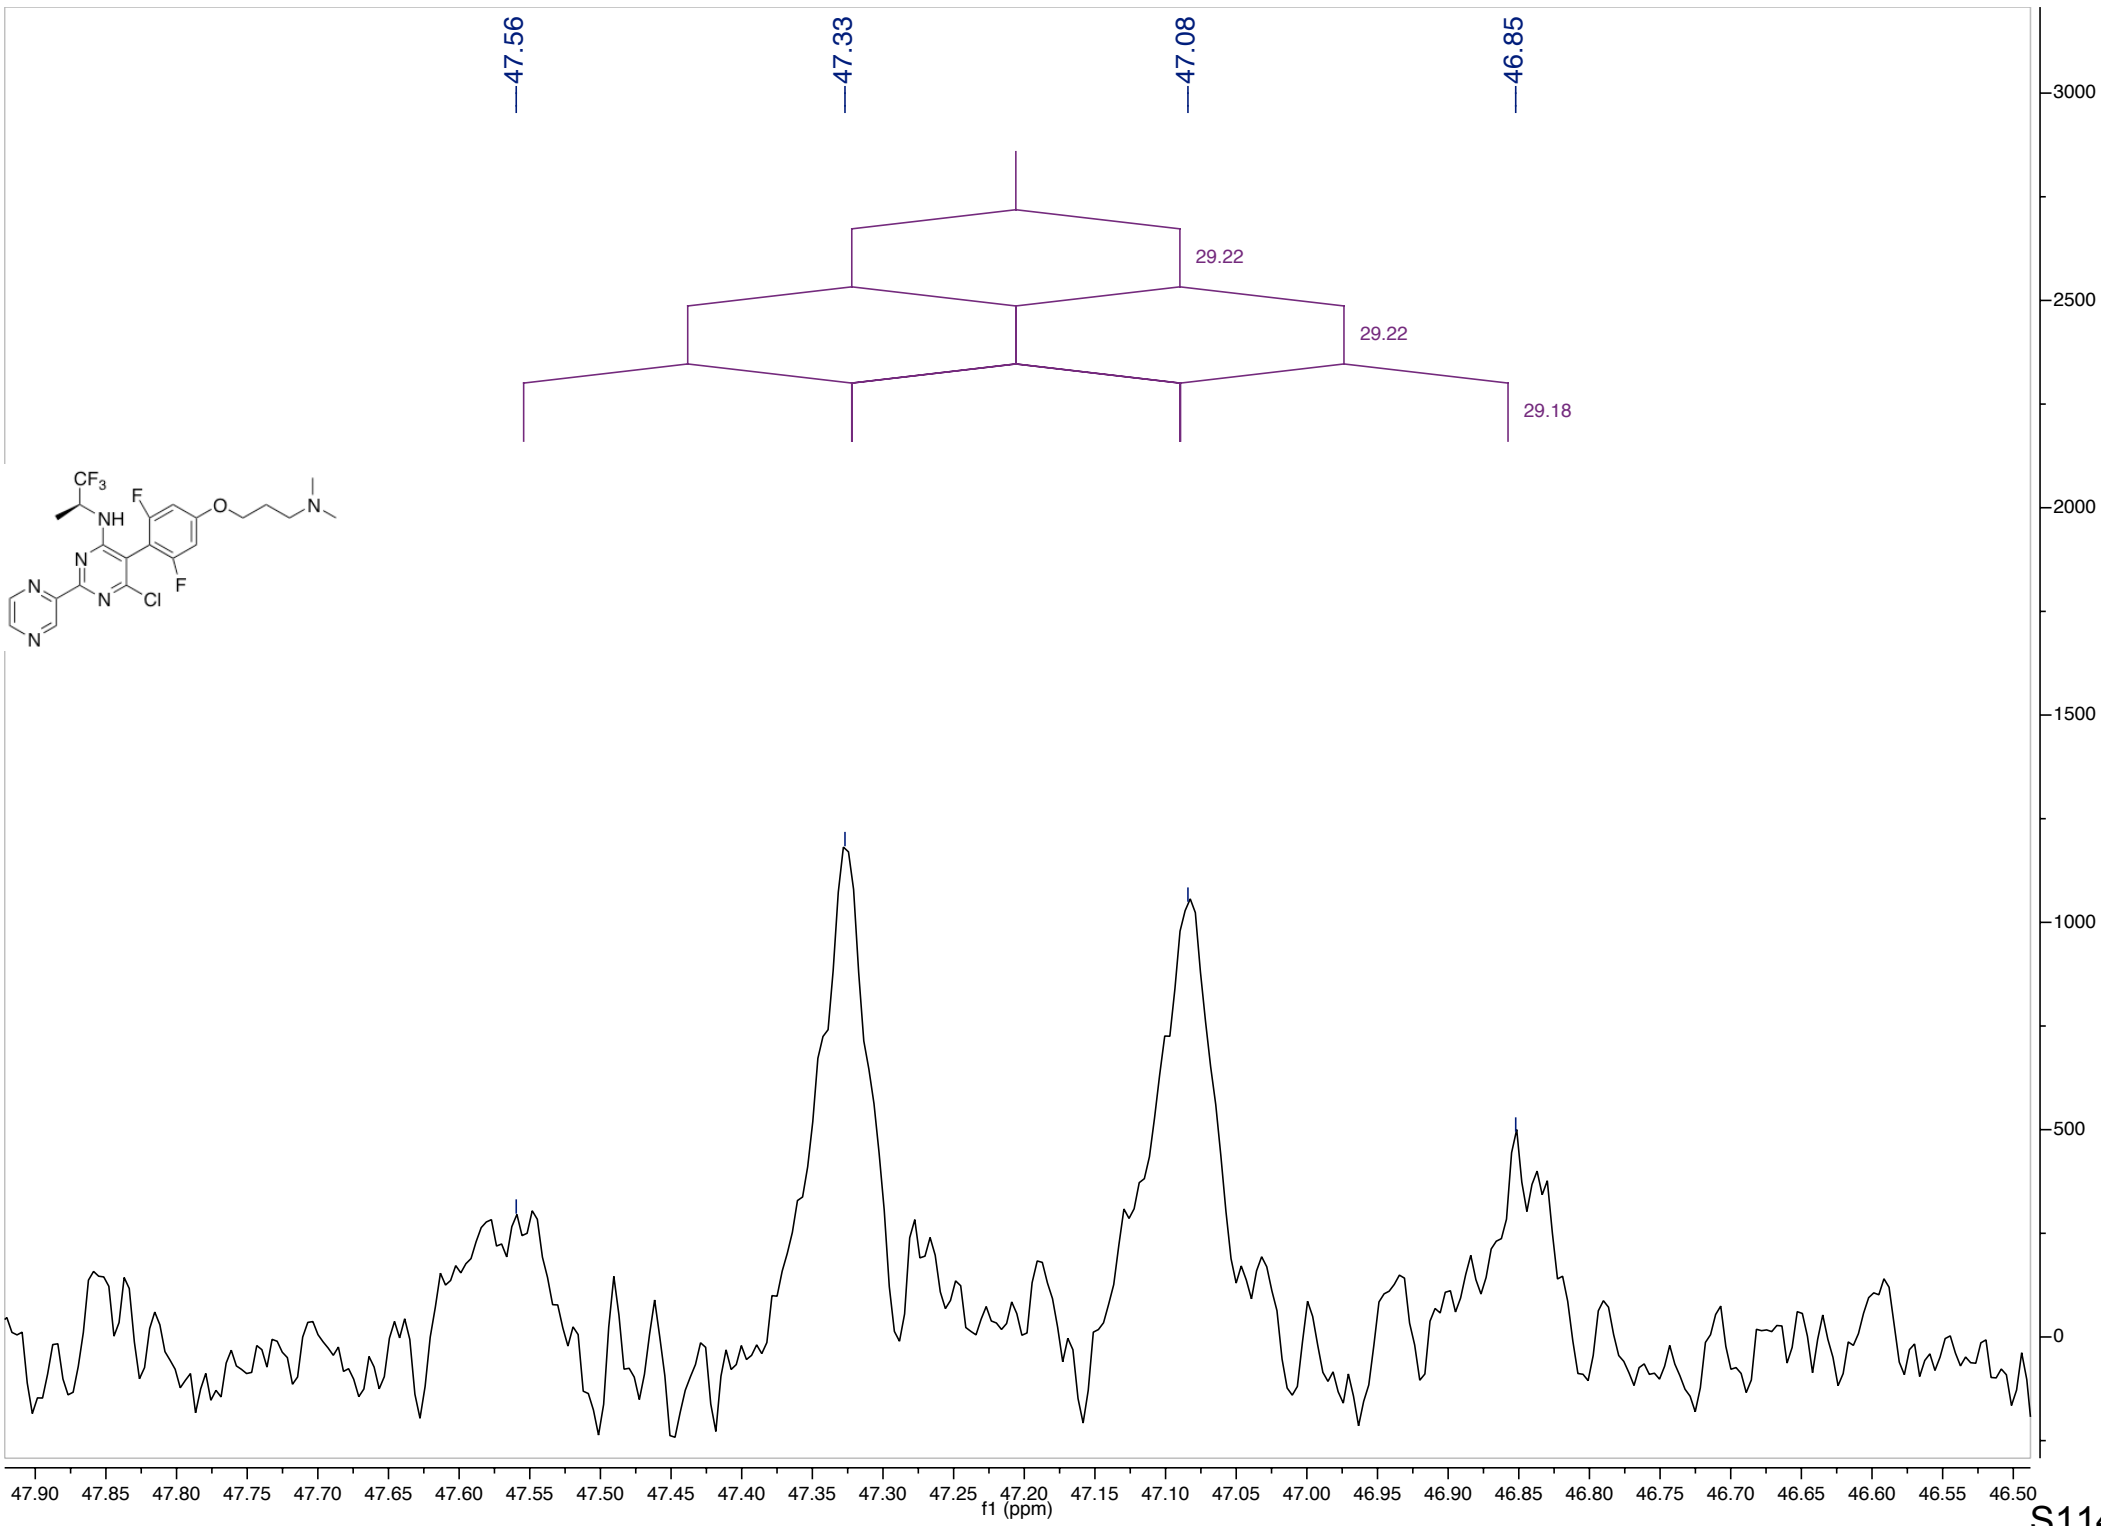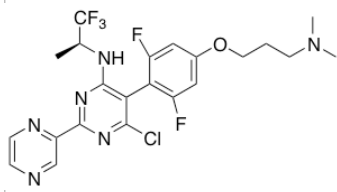

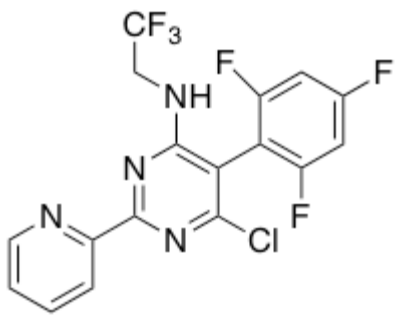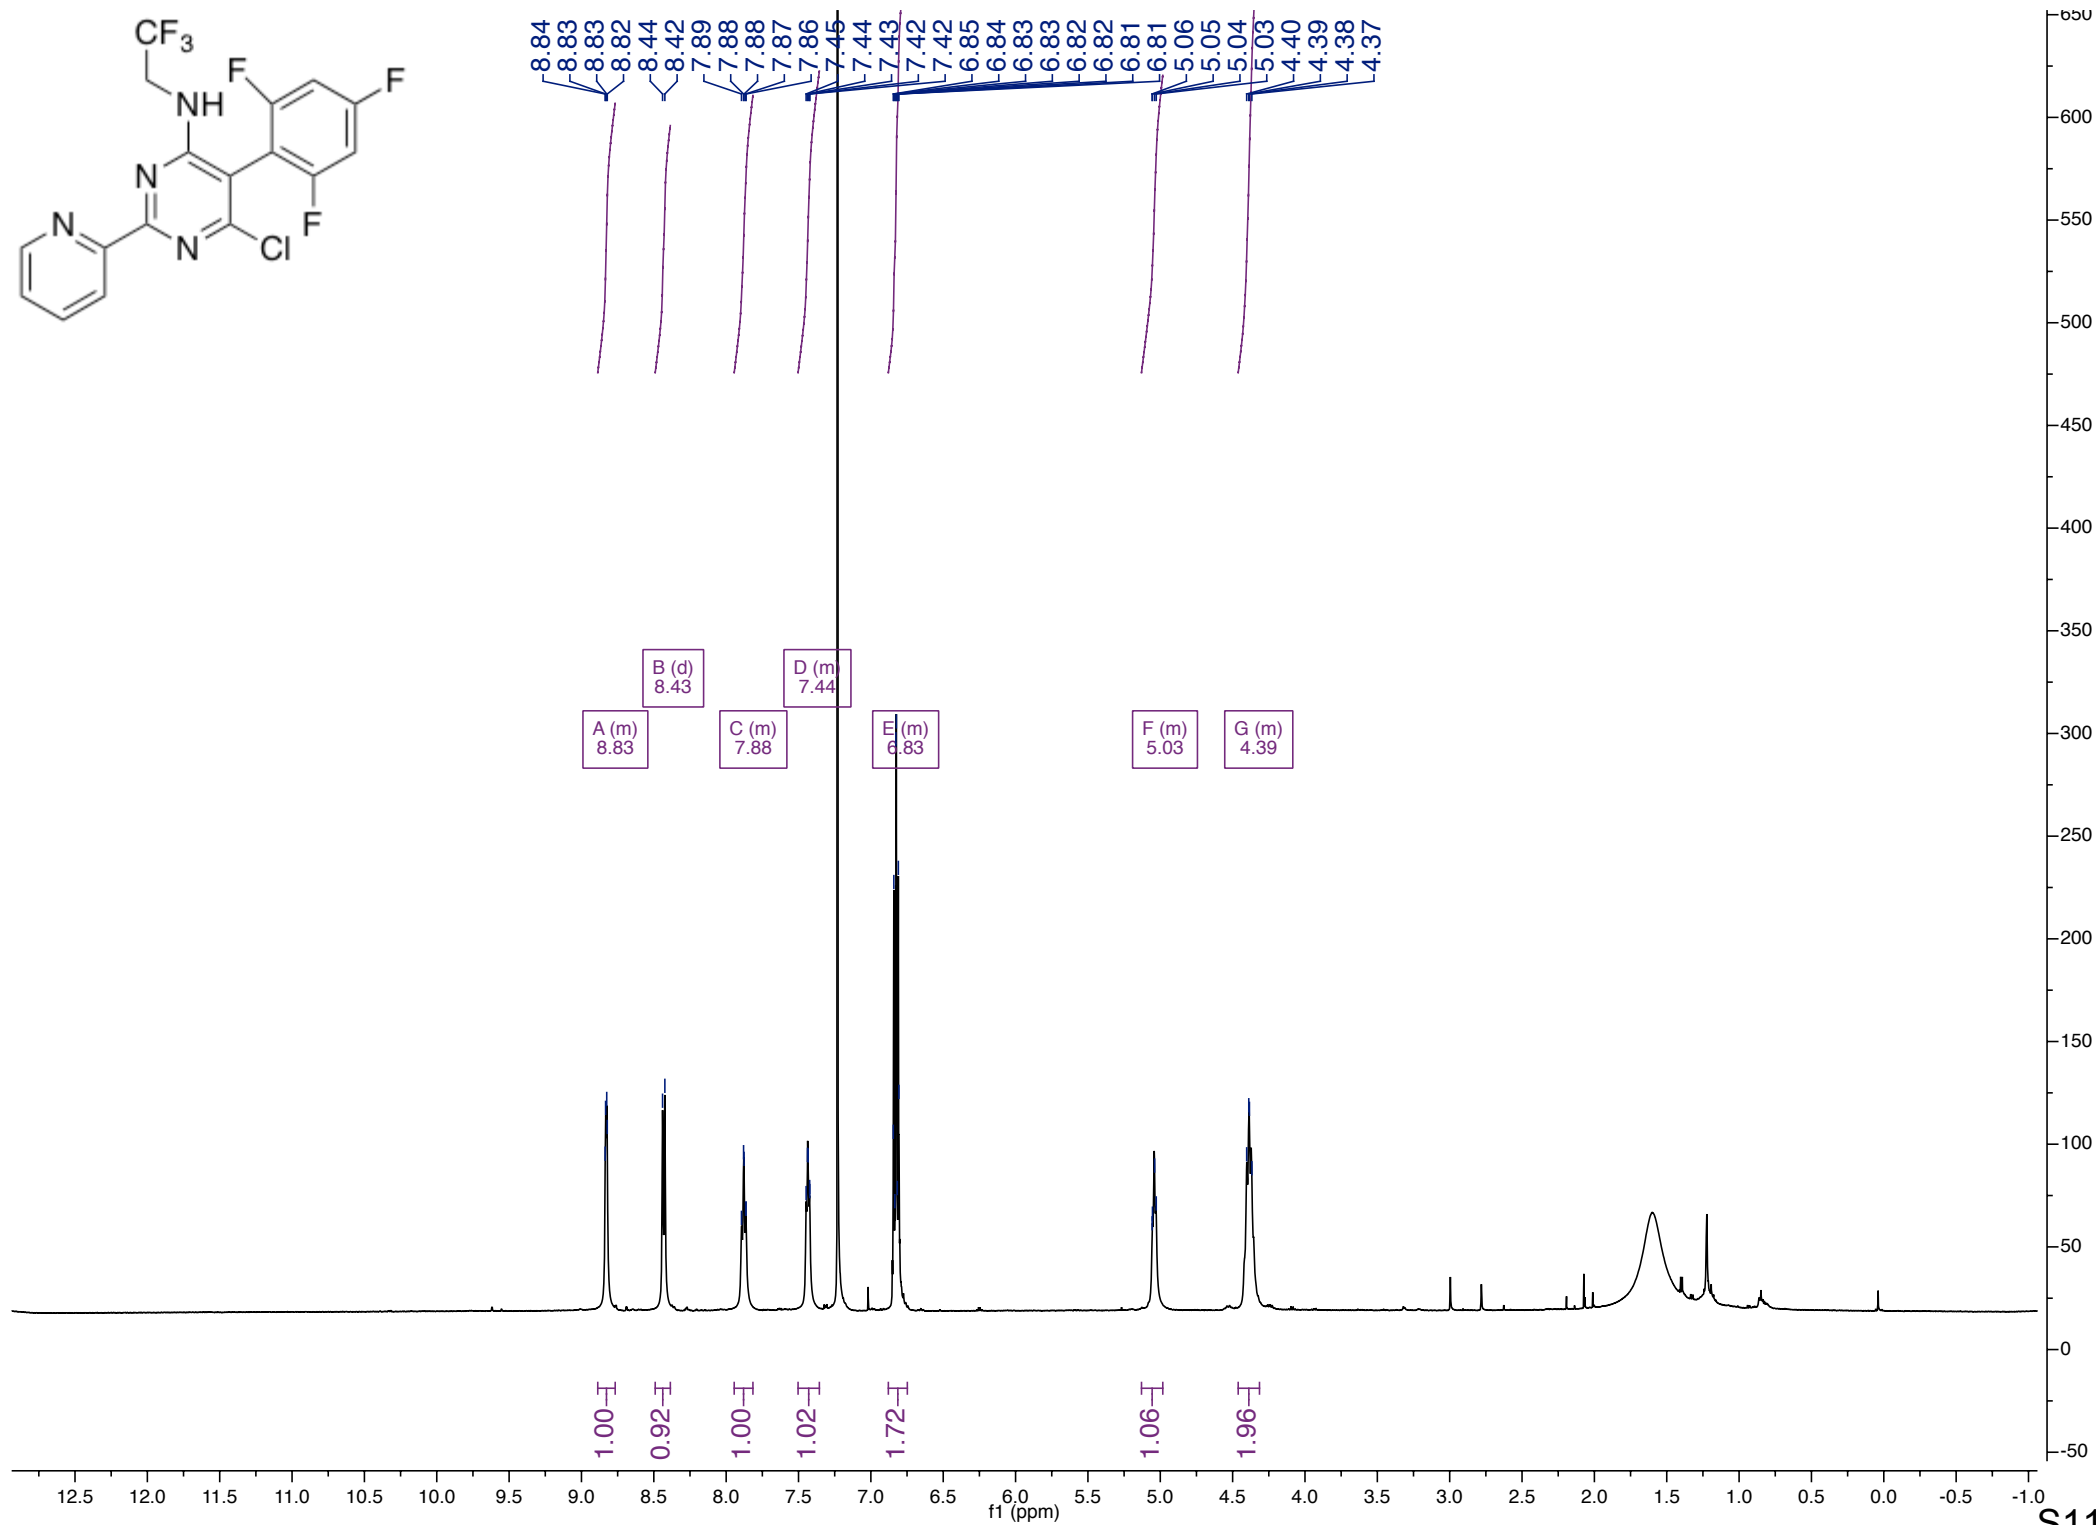

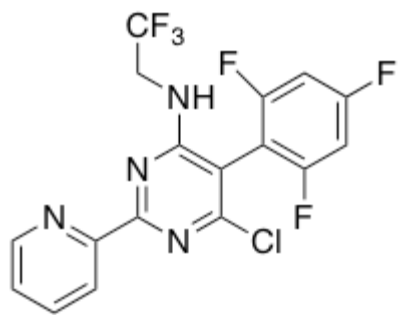

165.44  
165.32  
165.20  
163.42  
163.30  
163.18  
162.10  
162.03  
161.98  
161.91  
161.59  
161.51  
160.09  
160.02  
159.97  
159.90  
153.37  
149.79

137.82  
127.71  
125.77  
125.49  
124.37  
124.35  
123.27  
121.05  
105.37  
105.33  
105.21  
105.17  
105.04  
105.00  
104.46  
101.97  
101.95  
101.77  
101.74  
101.56  
101.53

43.14  
42.86  
42.59  
42.31

25.32  
25.28  
15.94  
15.02  
15.14

21.35  
25.98  
21.25  
25.92  
53.37

34.85  
34.84  
34.84

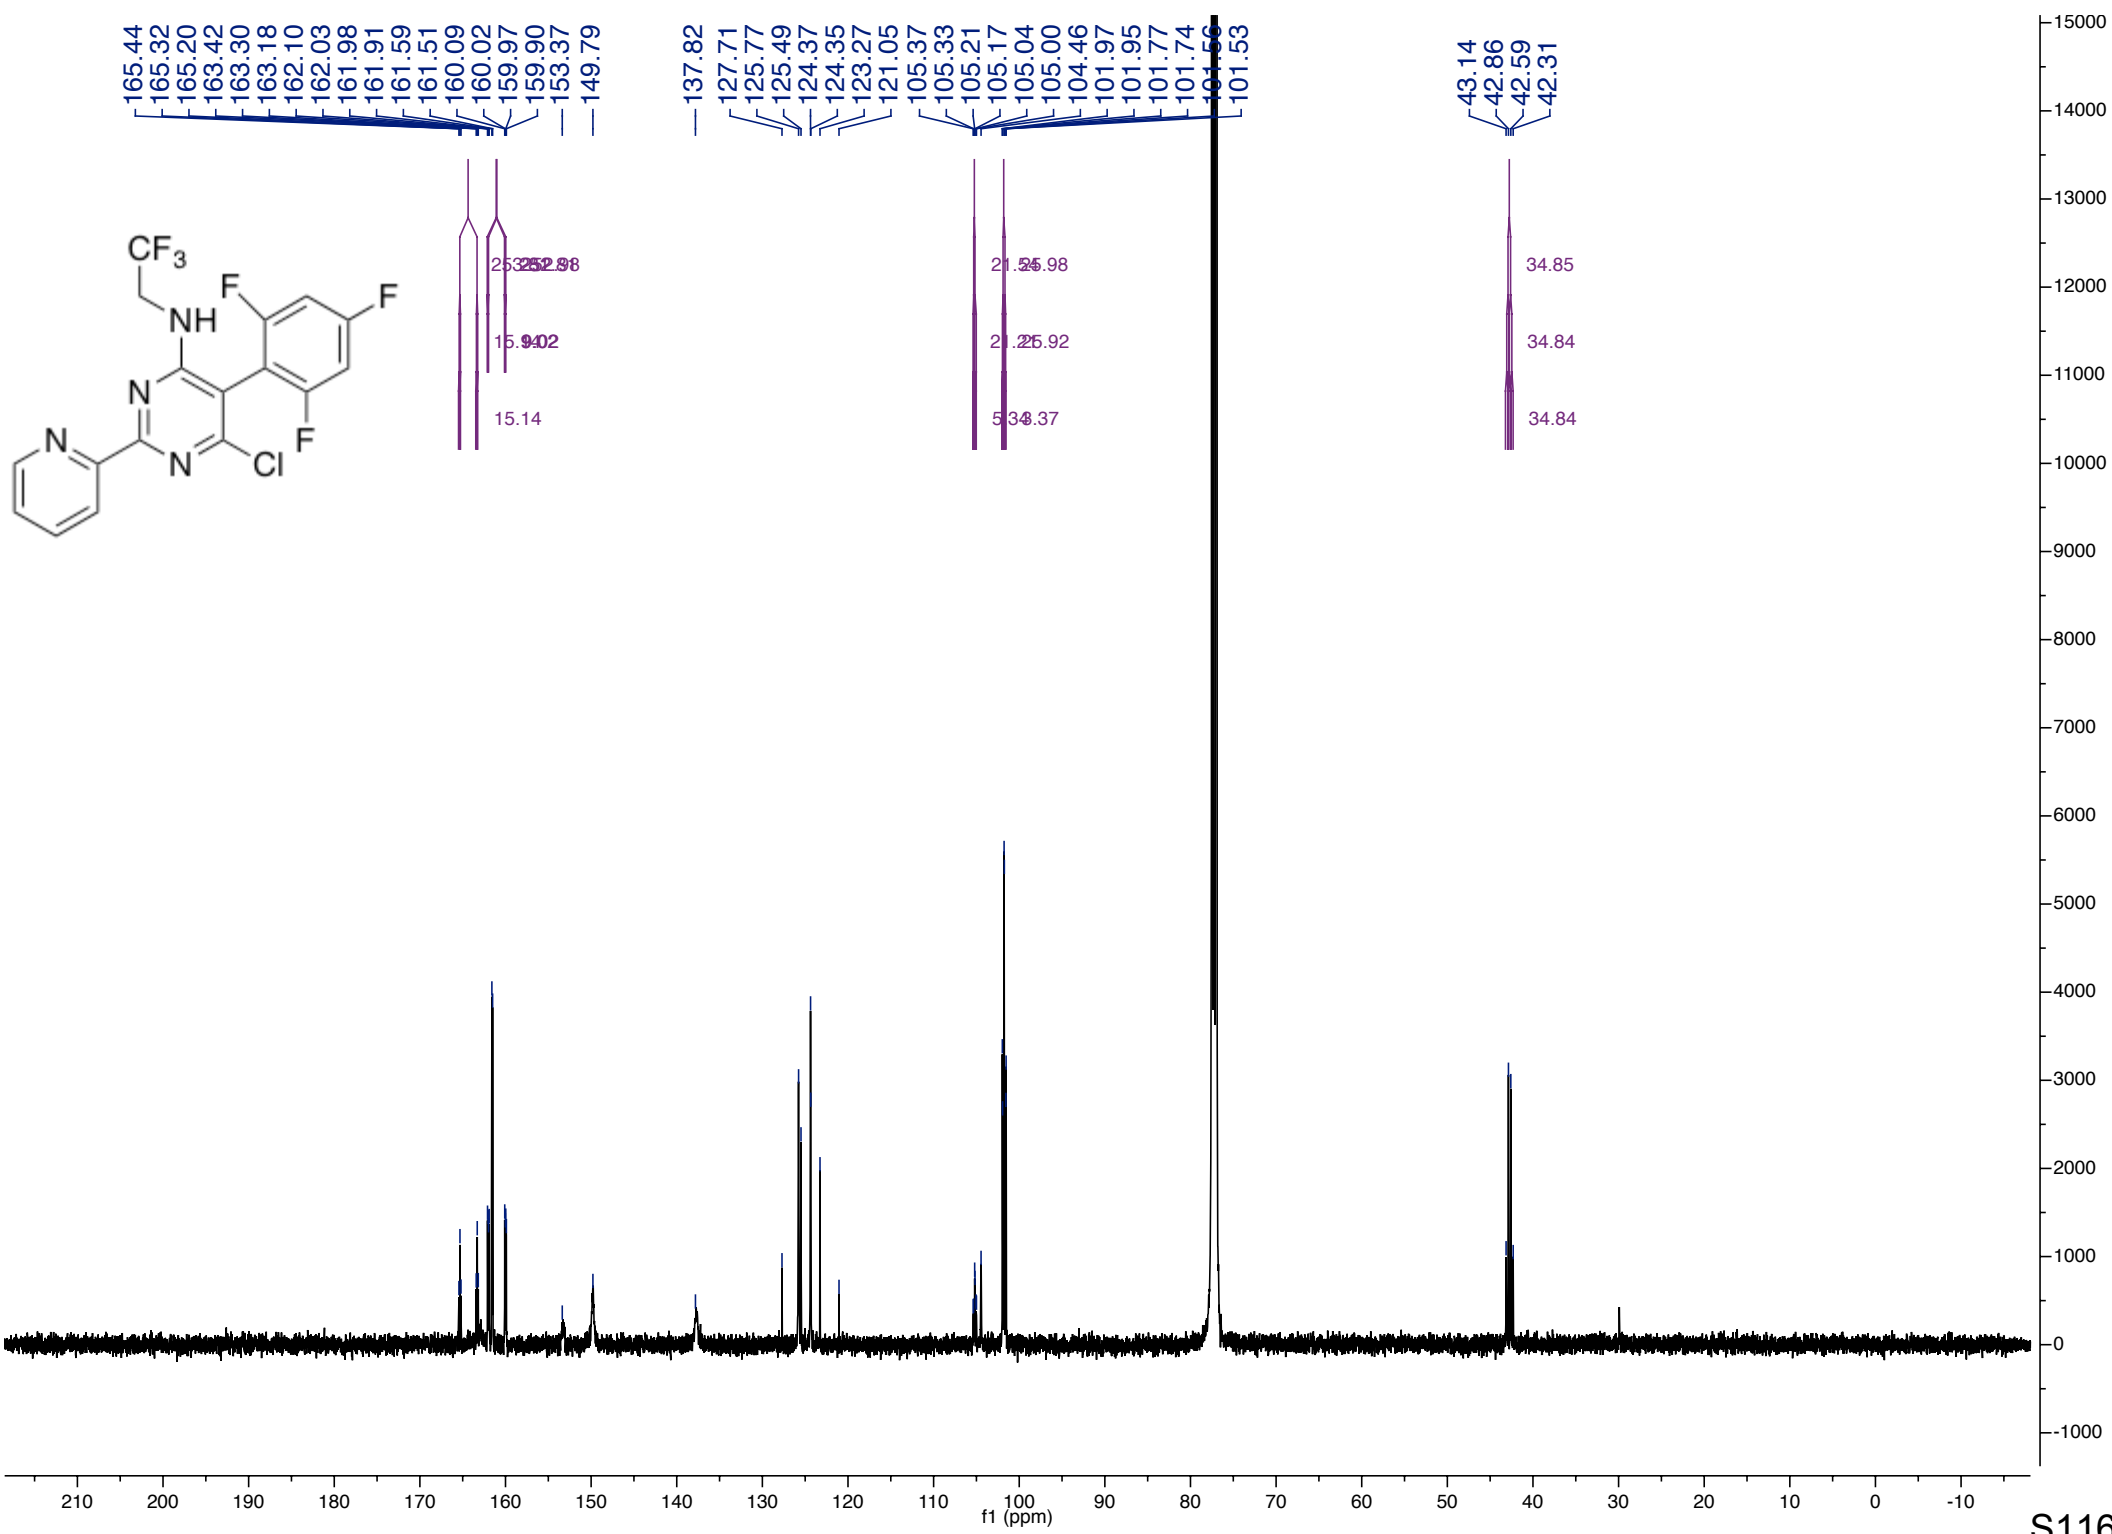

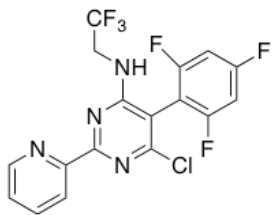

165.44  
165.32  
165.20

163.42  
163.30  
163.18

162.10  
162.03  
161.98  
161.91

161.59  
161.51

160.09  
160.02  
159.97  
159.90

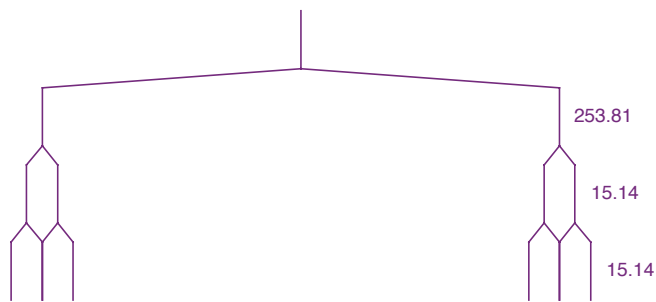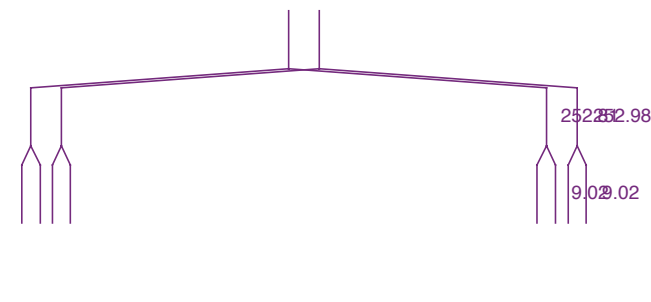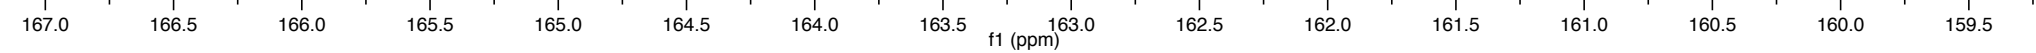

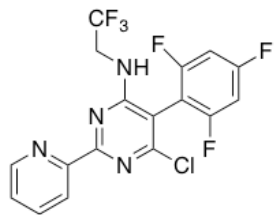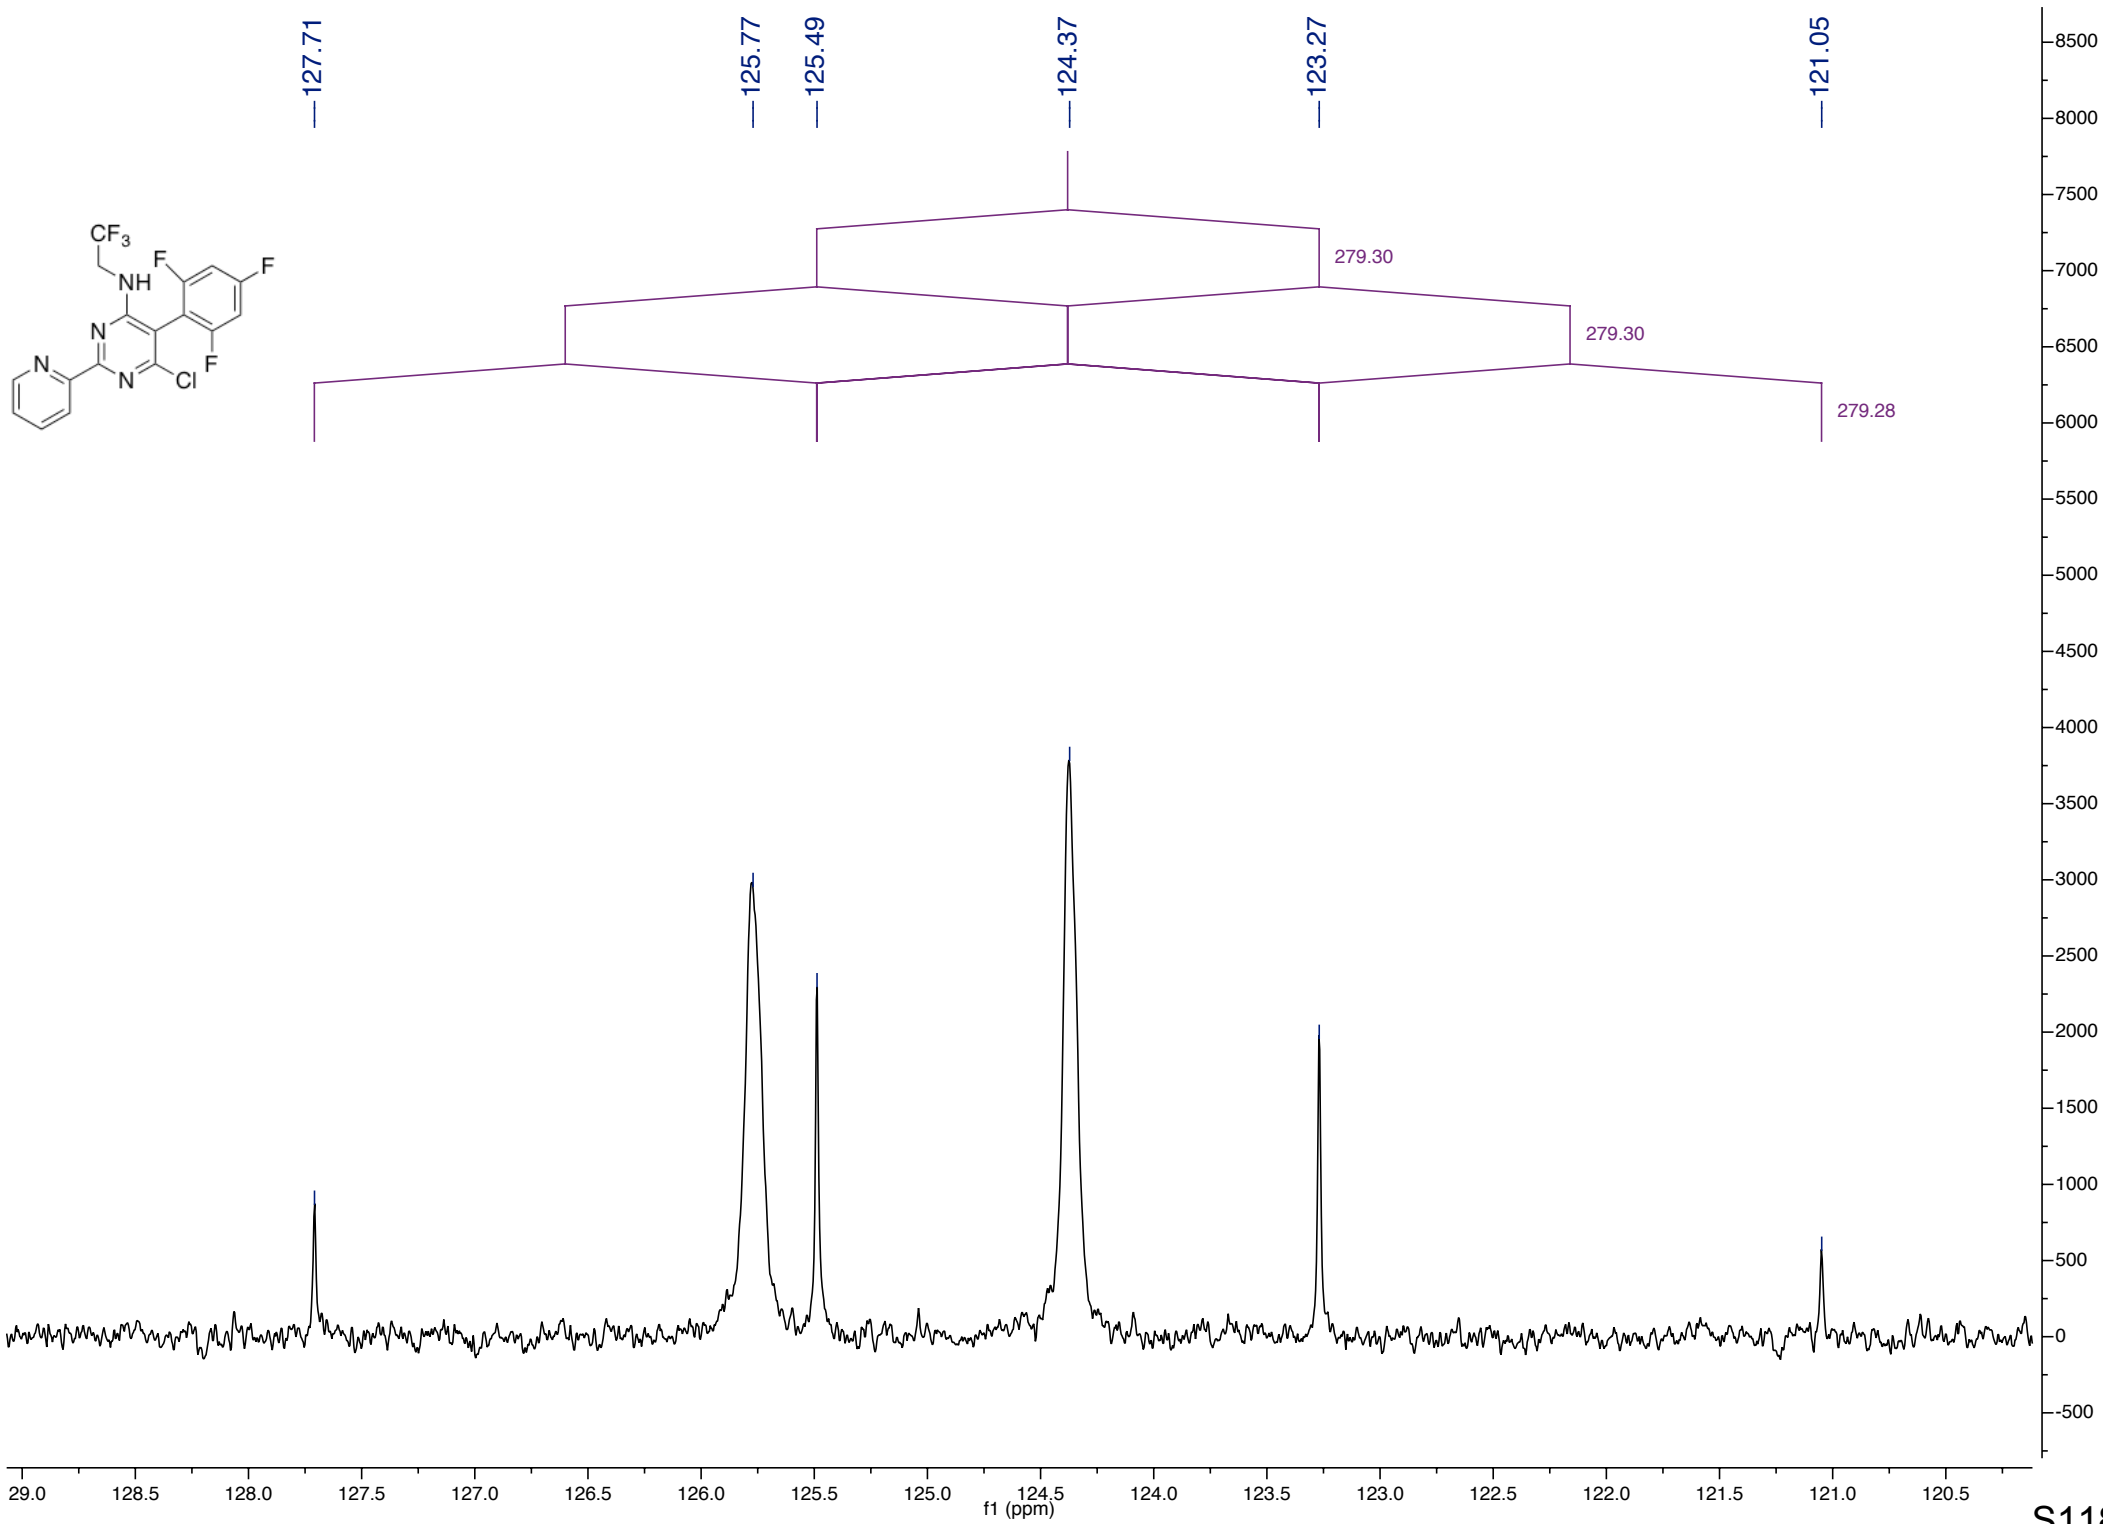

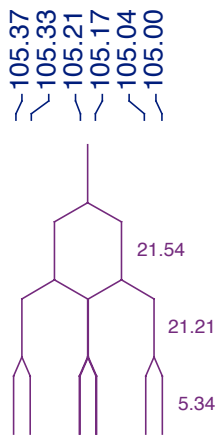

104.46

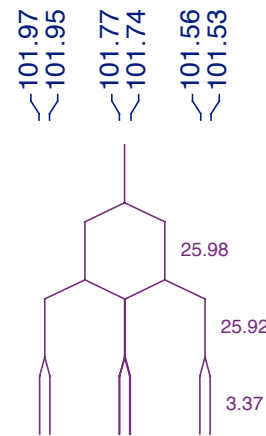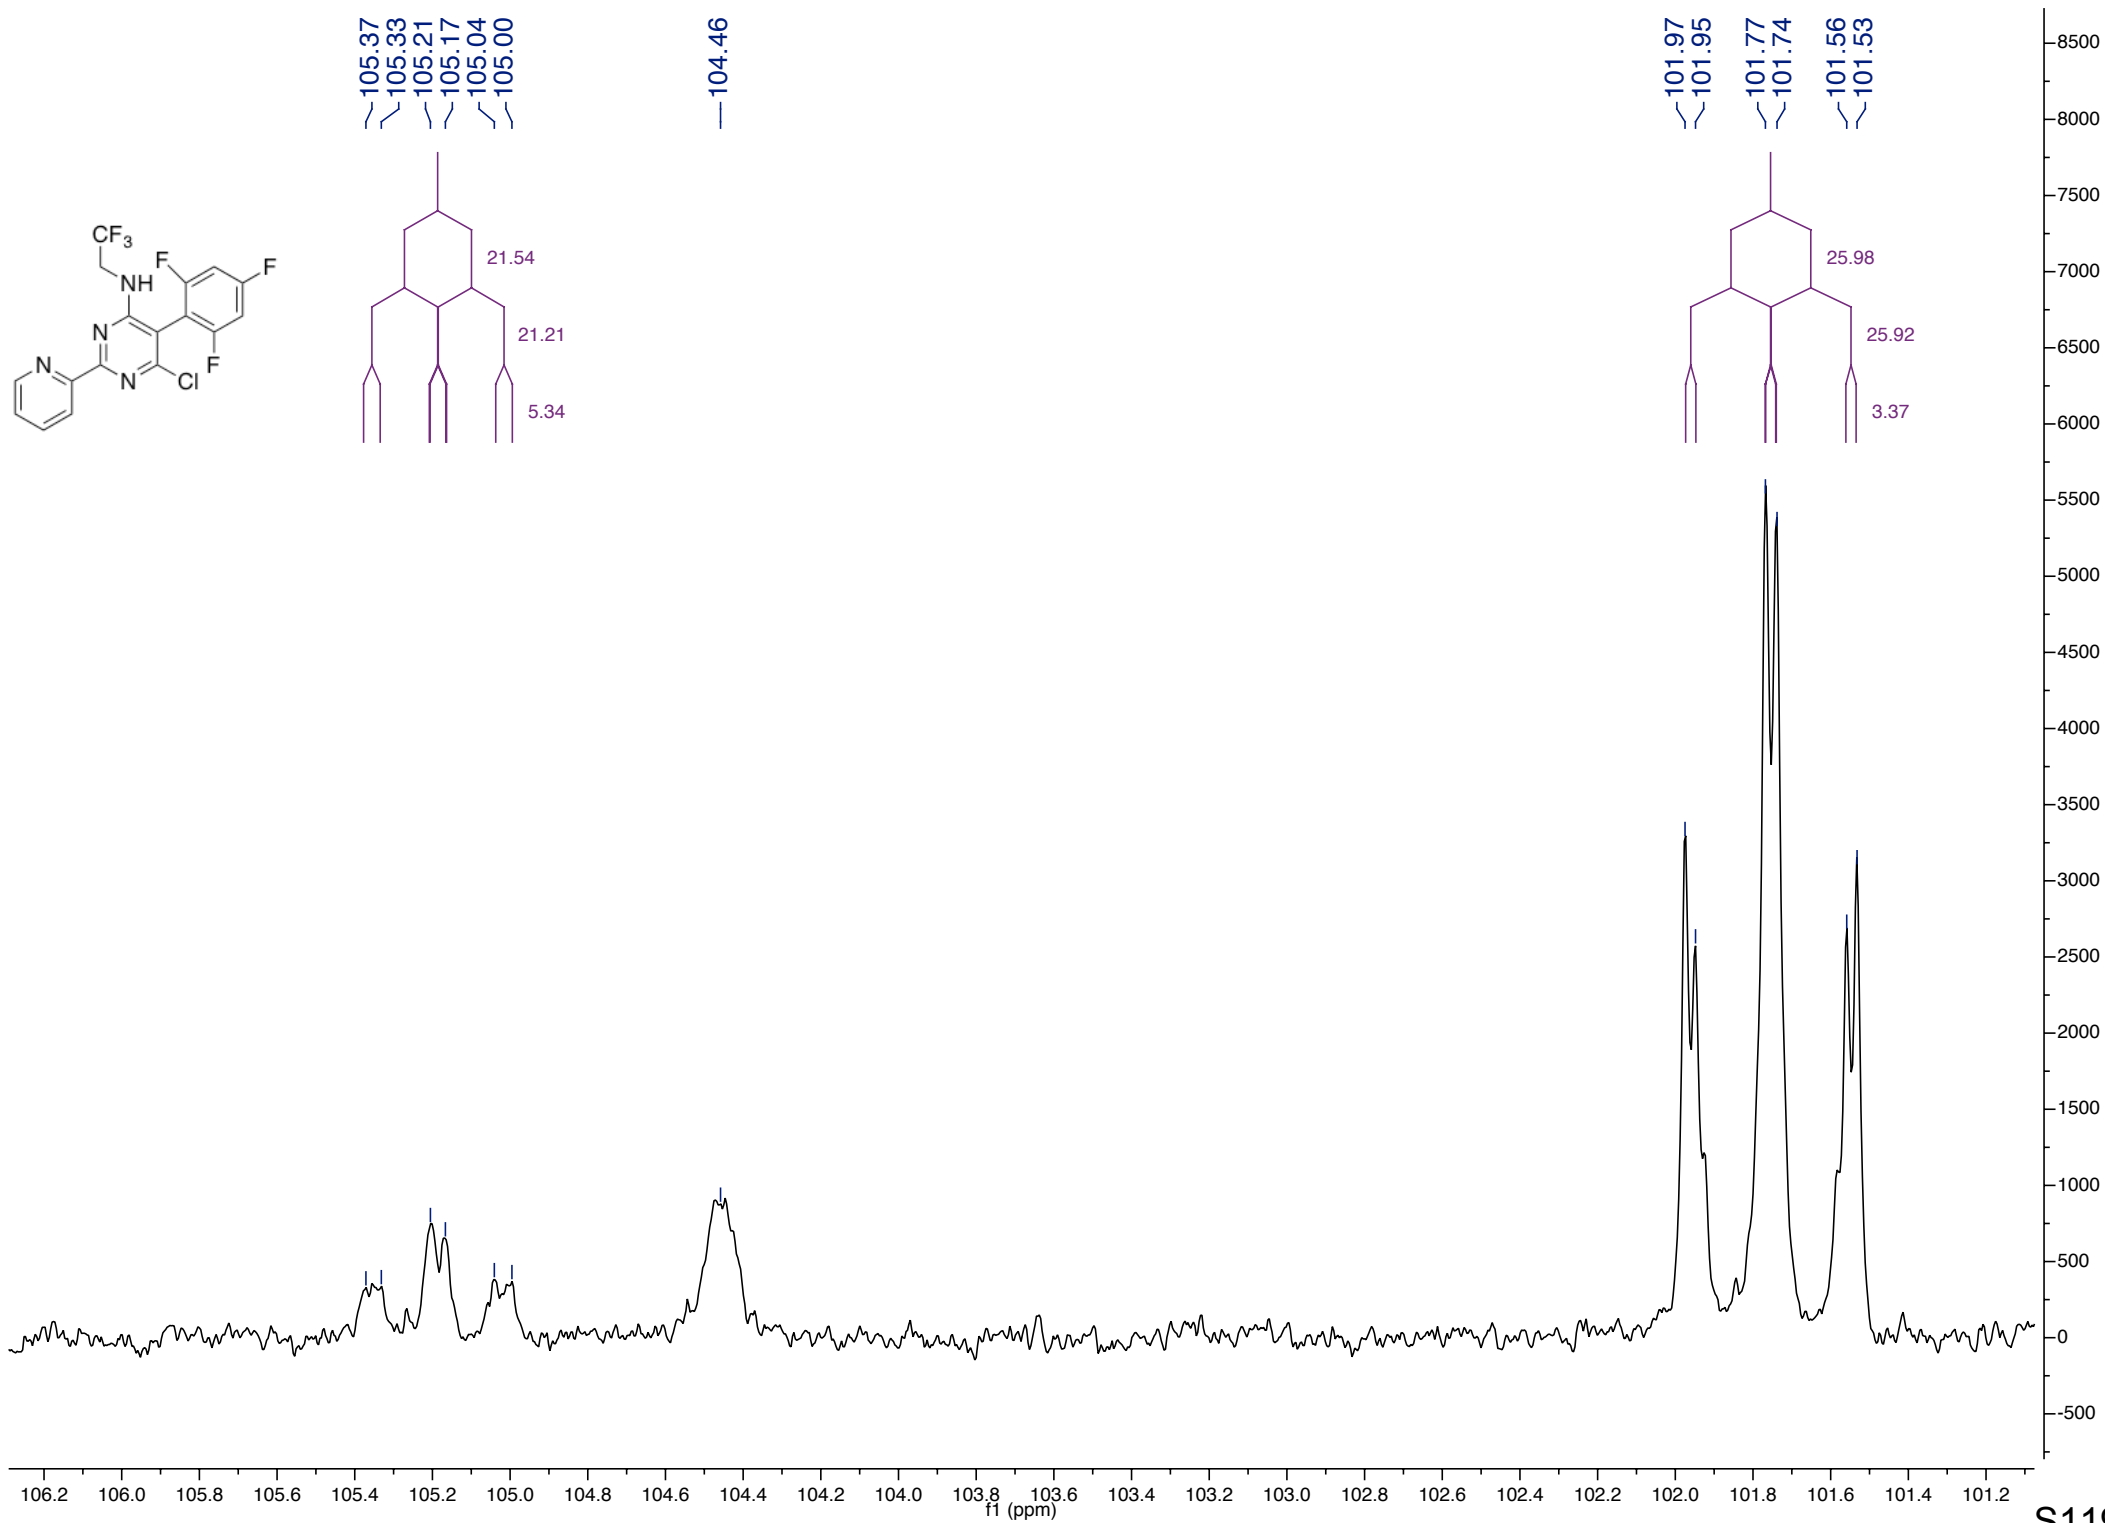

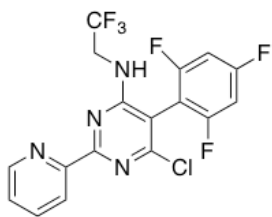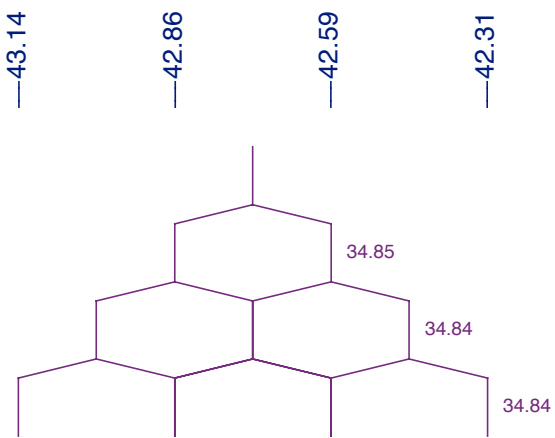

43.14

42.86

42.59

42.31

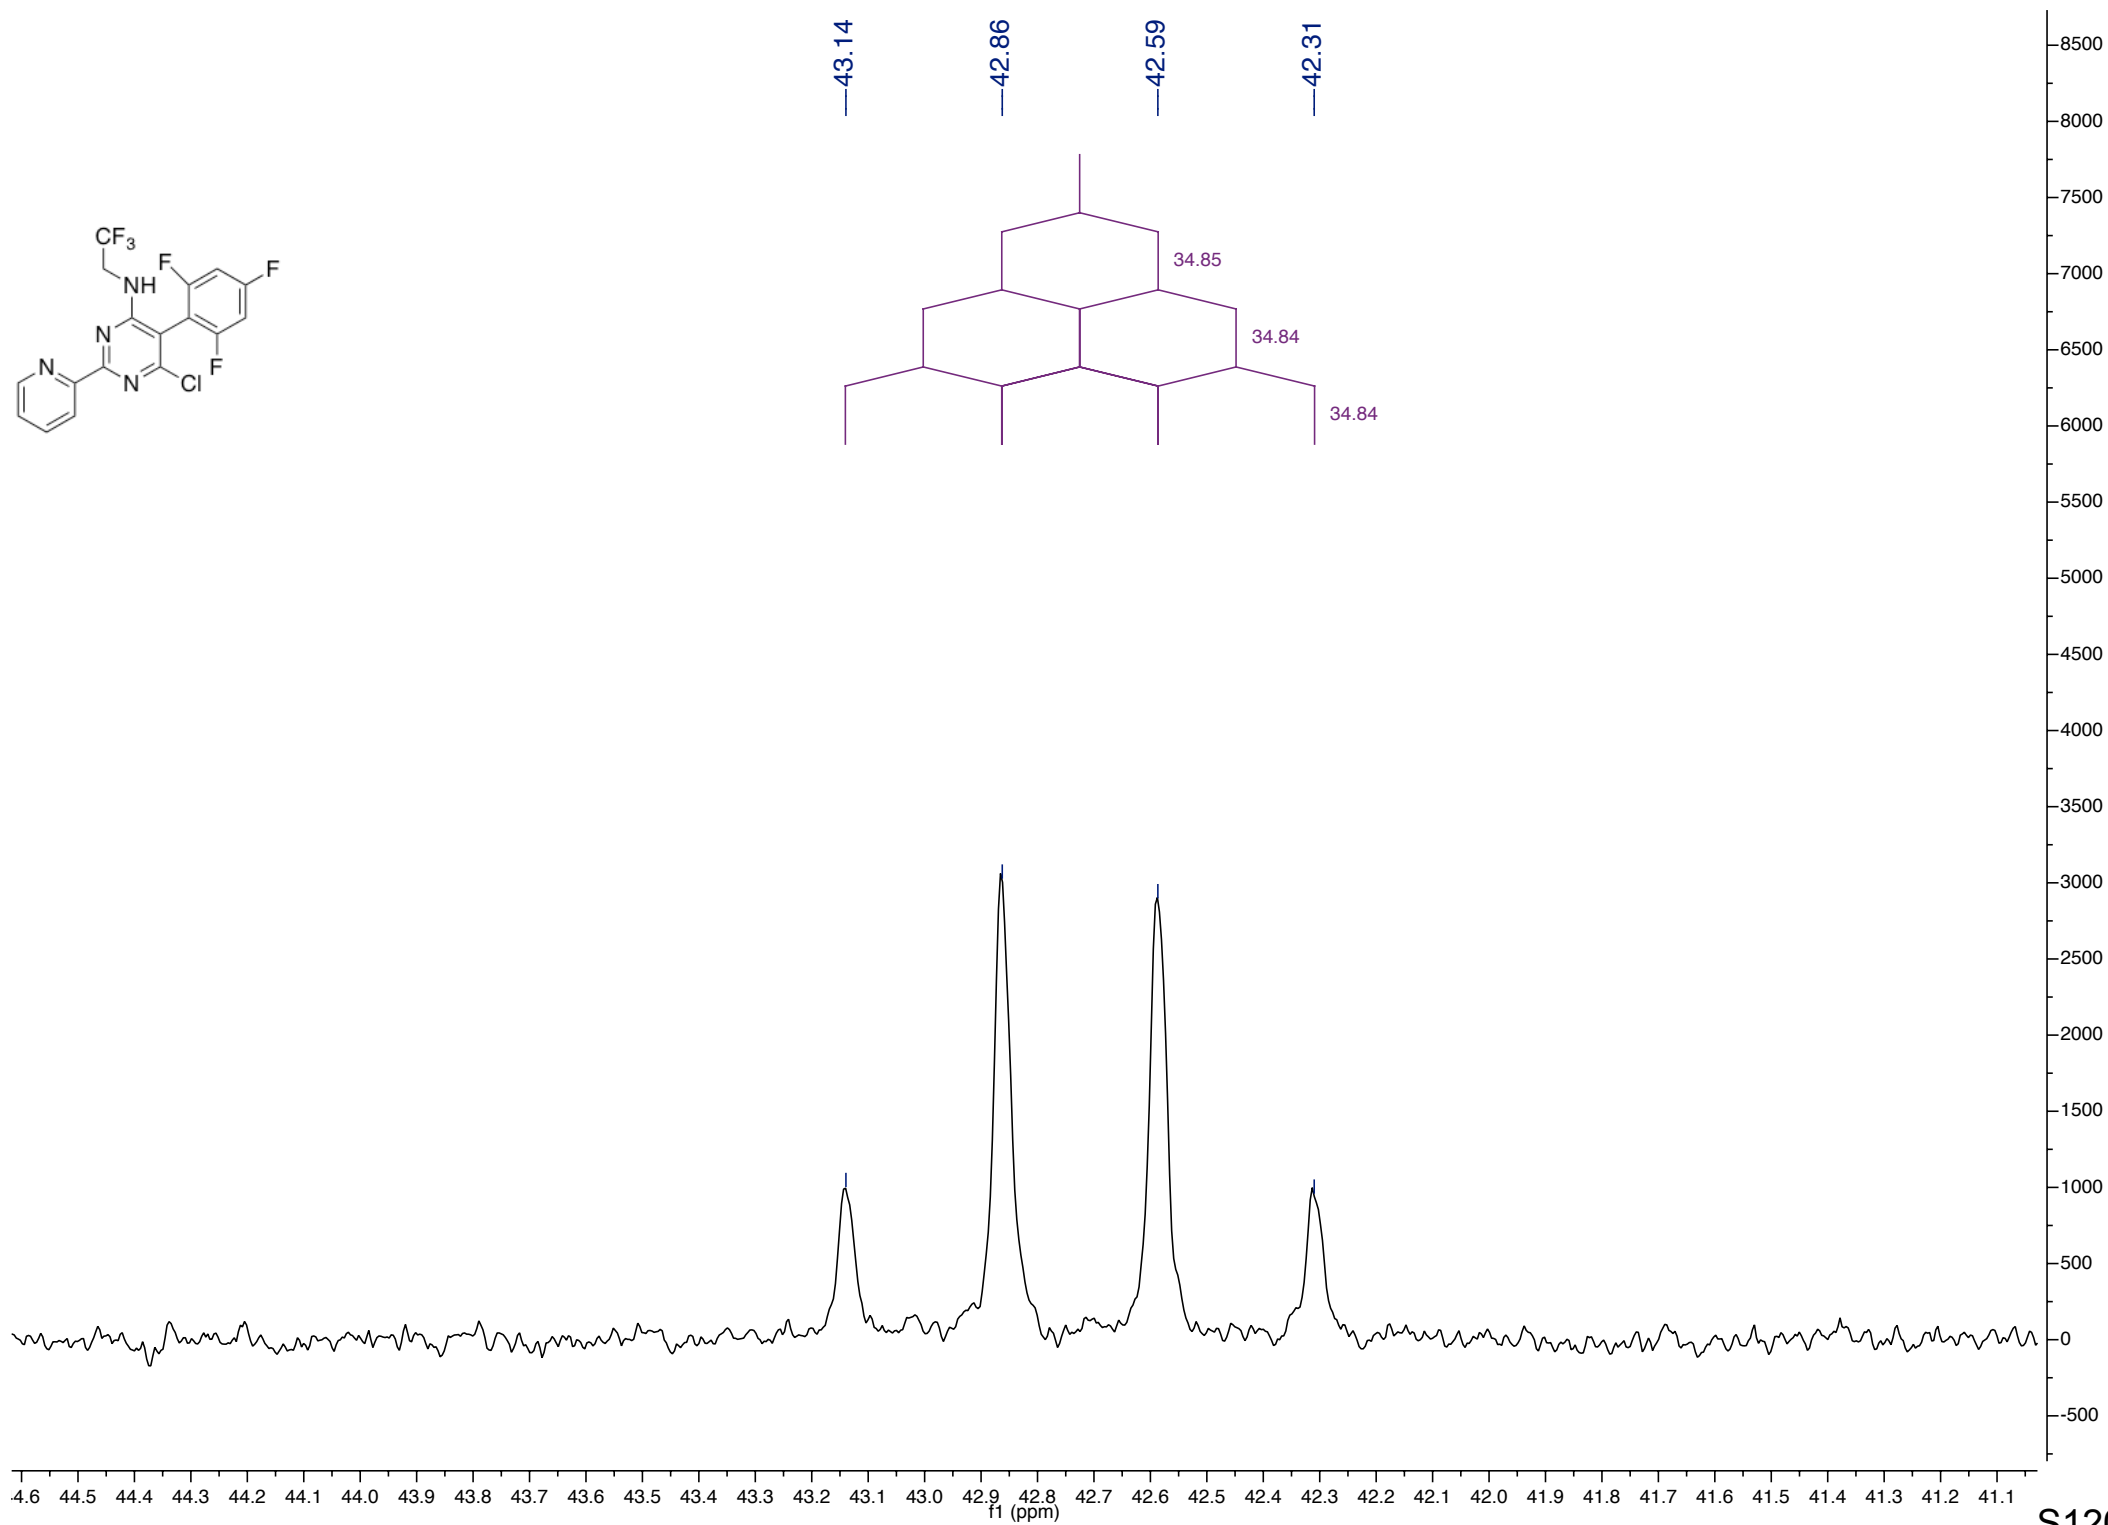



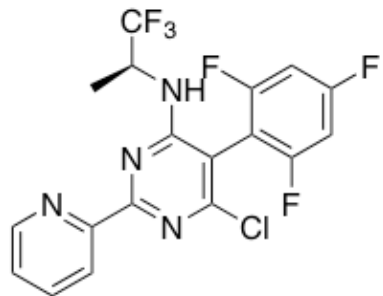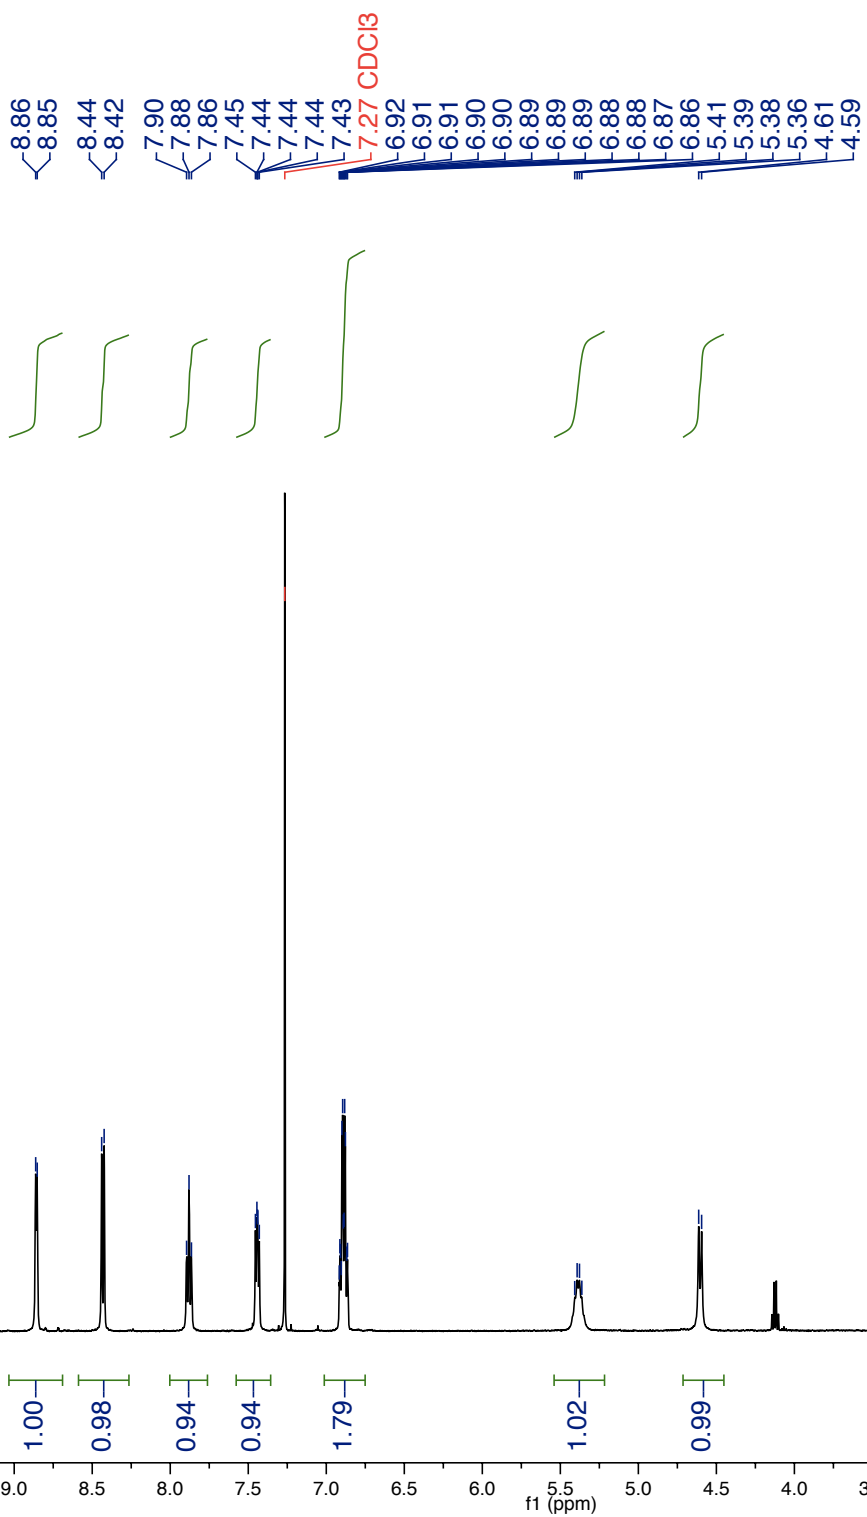

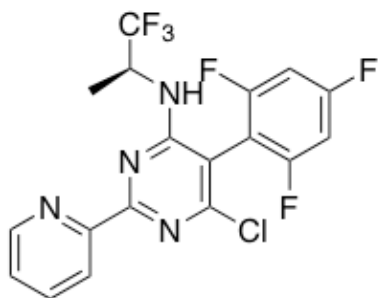

165.34  
165.22  
165.10  
163.33  
163.21  
163.09  
162.87  
161.98  
161.91  
161.86  
161.79  
161.41  
161.11  
159.97  
159.90  
159.85  
159.78  
153.24  
149.82

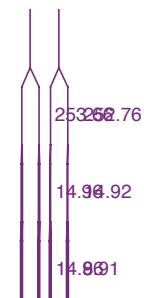

137.62  
128.85  
126.61  
125.69  
124.37  
124.29  
122.13

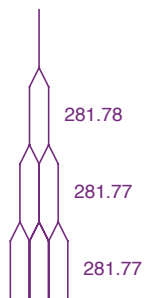

105.29  
105.25  
105.12  
105.08  
104.95  
104.92  
104.17  
102.04  
102.01  
101.90  
101.87  
101.84  
101.81  
101.69  
101.66  
101.63  
101.60  
101.49  
101.46

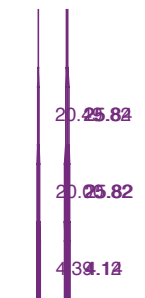

48.59  
48.34  
48.09  
47.84

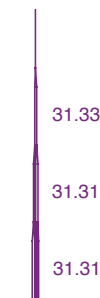

29.85

14.67  
14.66  
14.65  
14.63

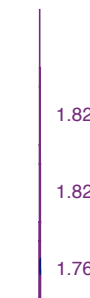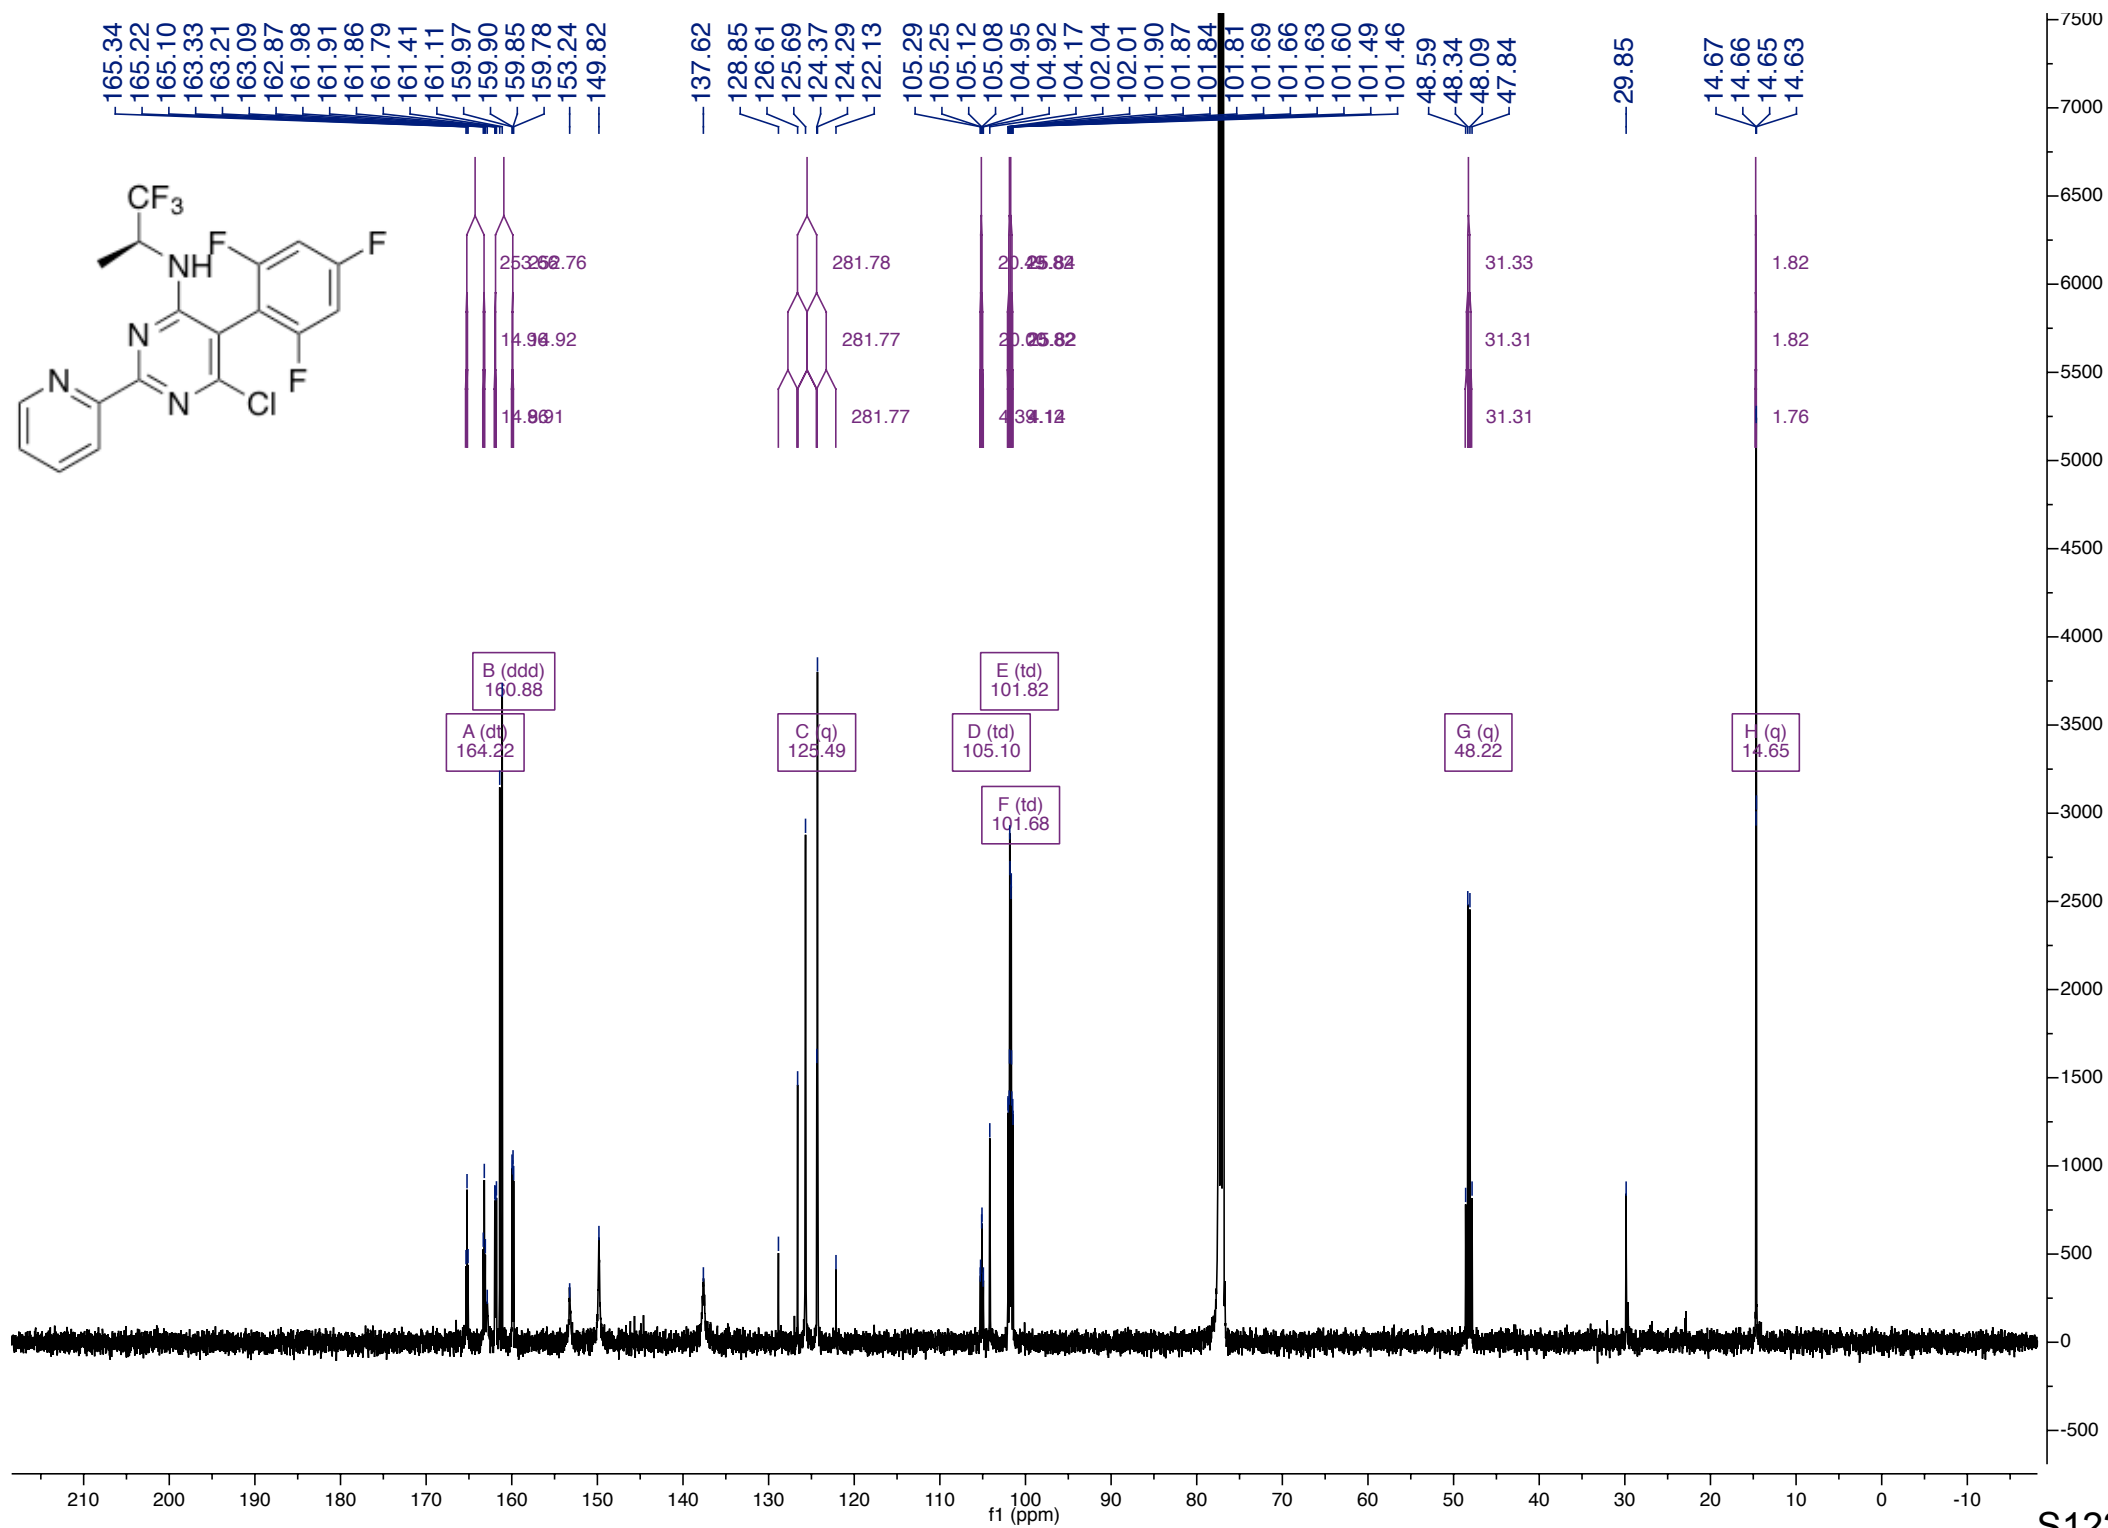

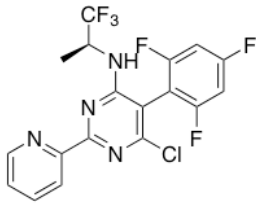

165.34  
165.22  
165.10

163.33  
163.21  
163.09  
162.87

161.98  
161.91  
161.86  
161.79  
161.41  
161.11

159.97  
159.90  
159.85  
159.78

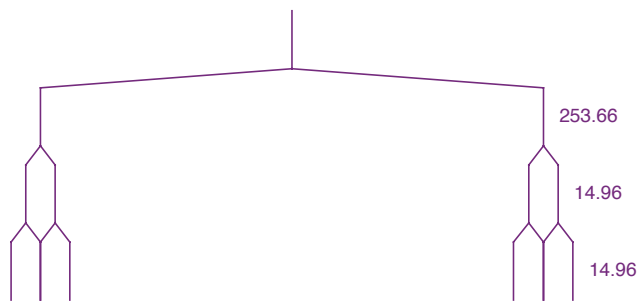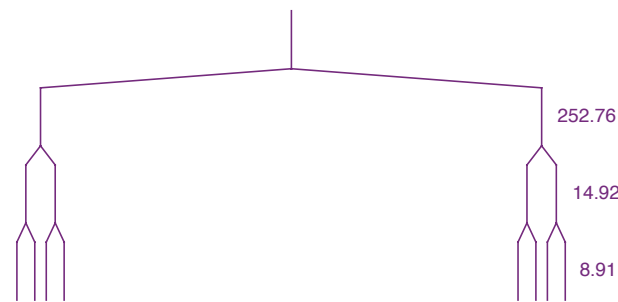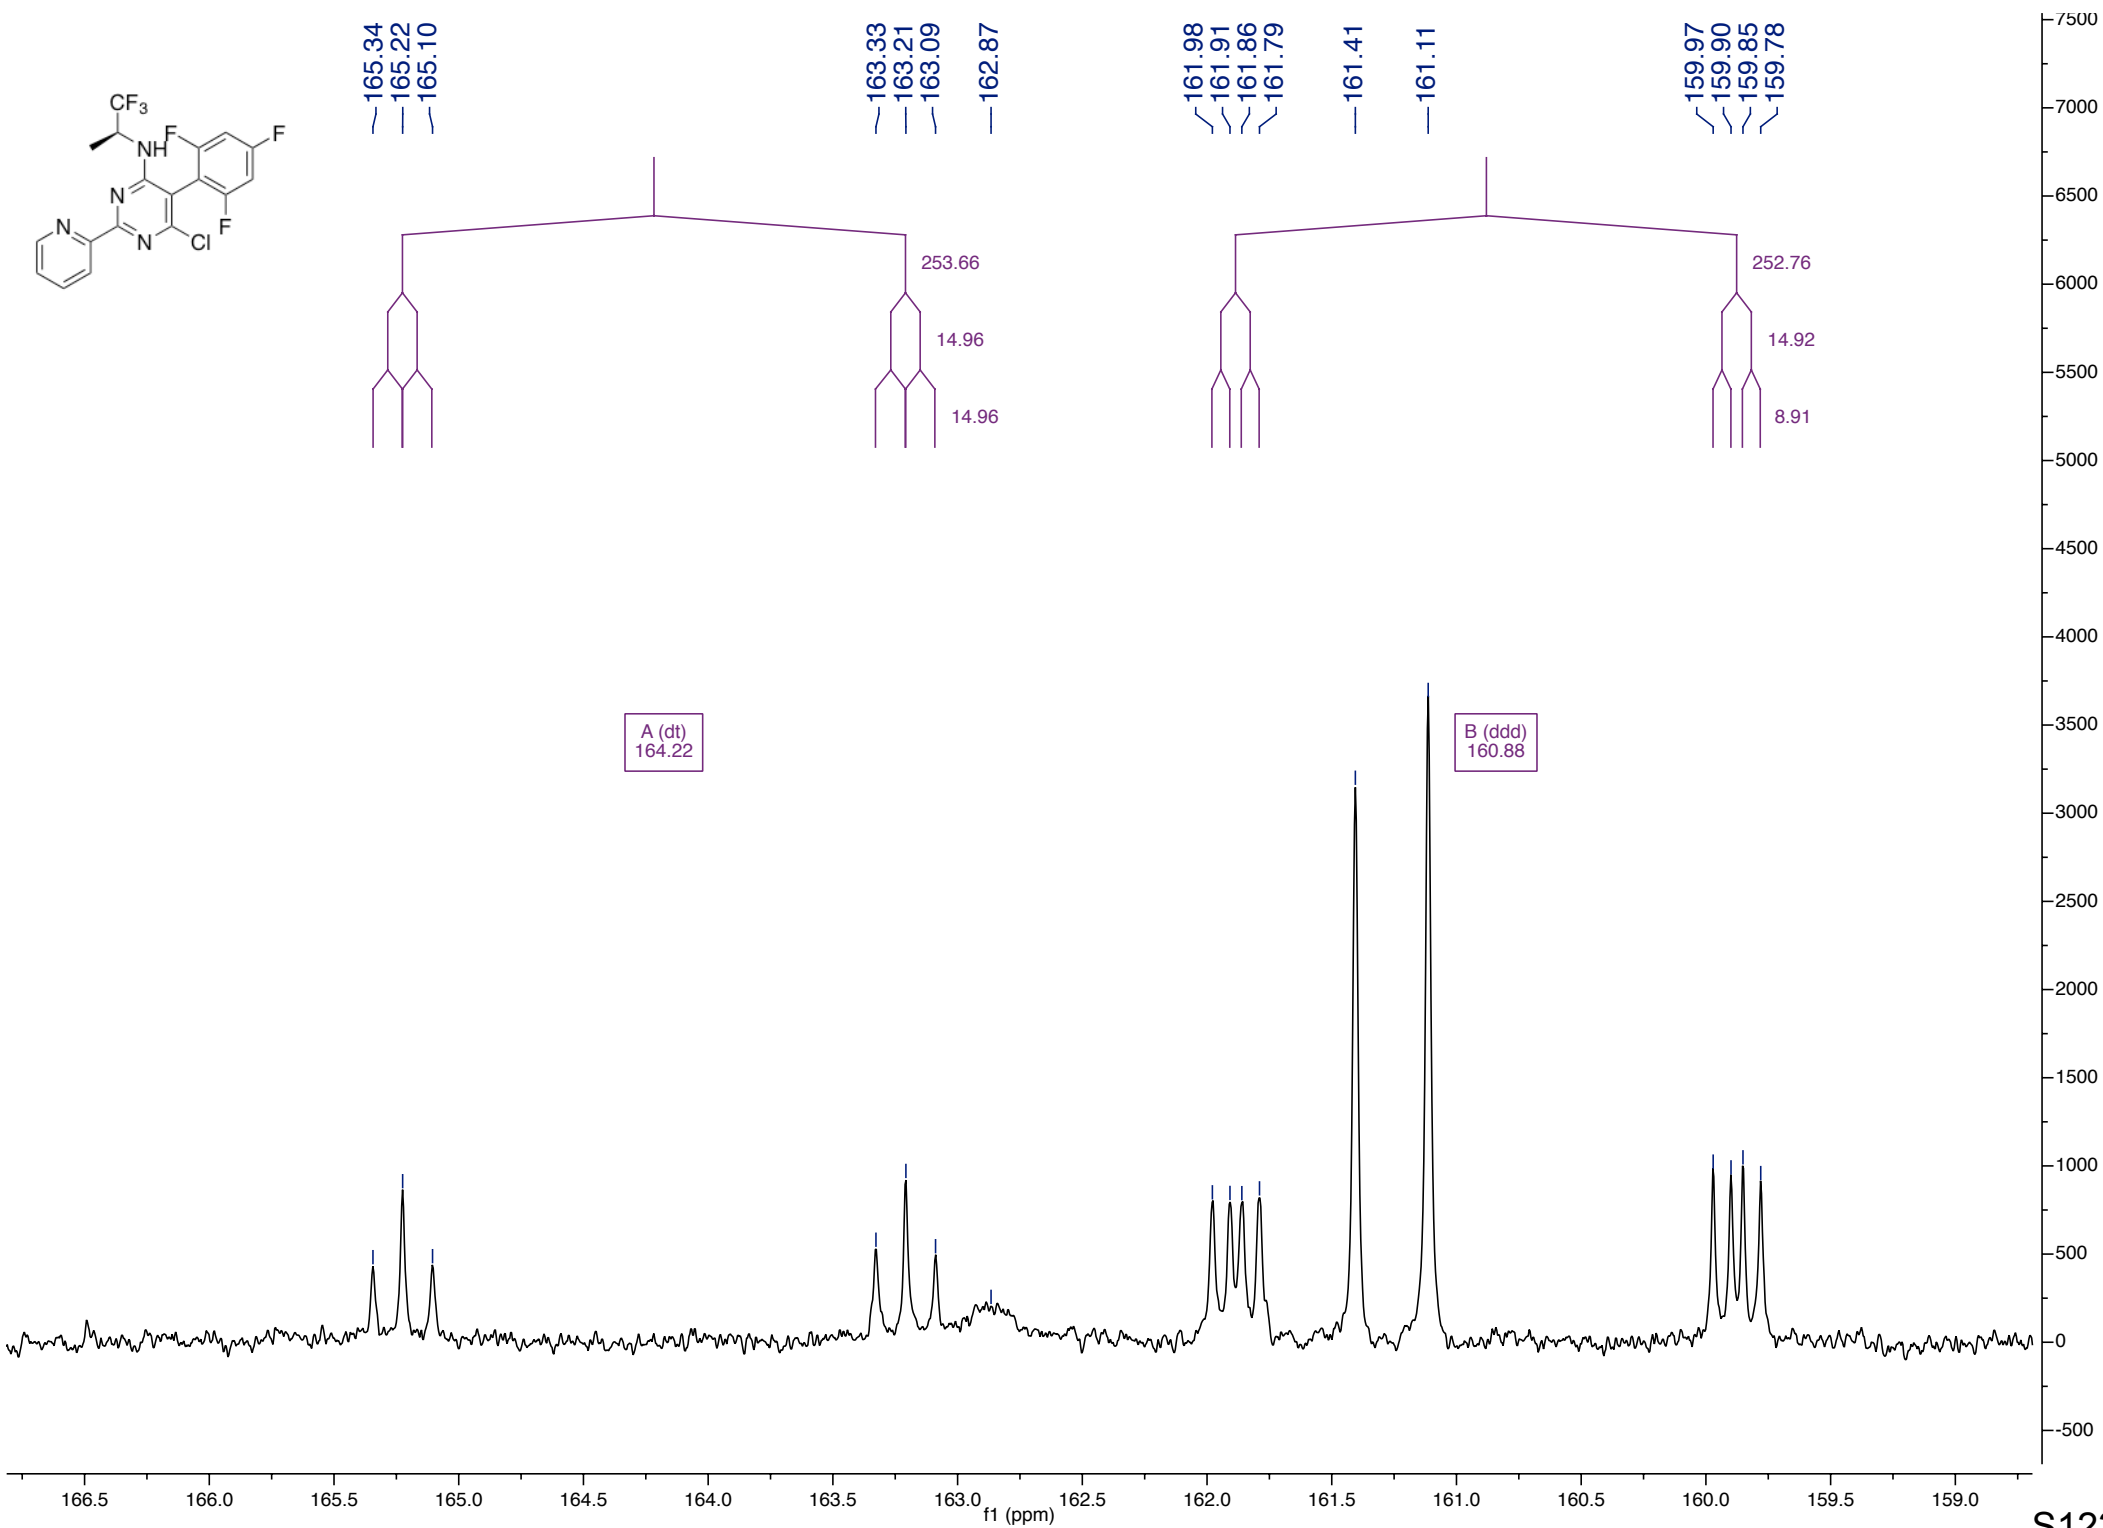

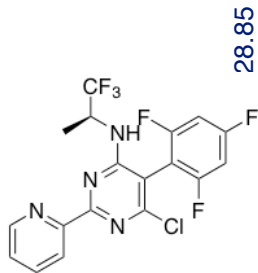

28.85

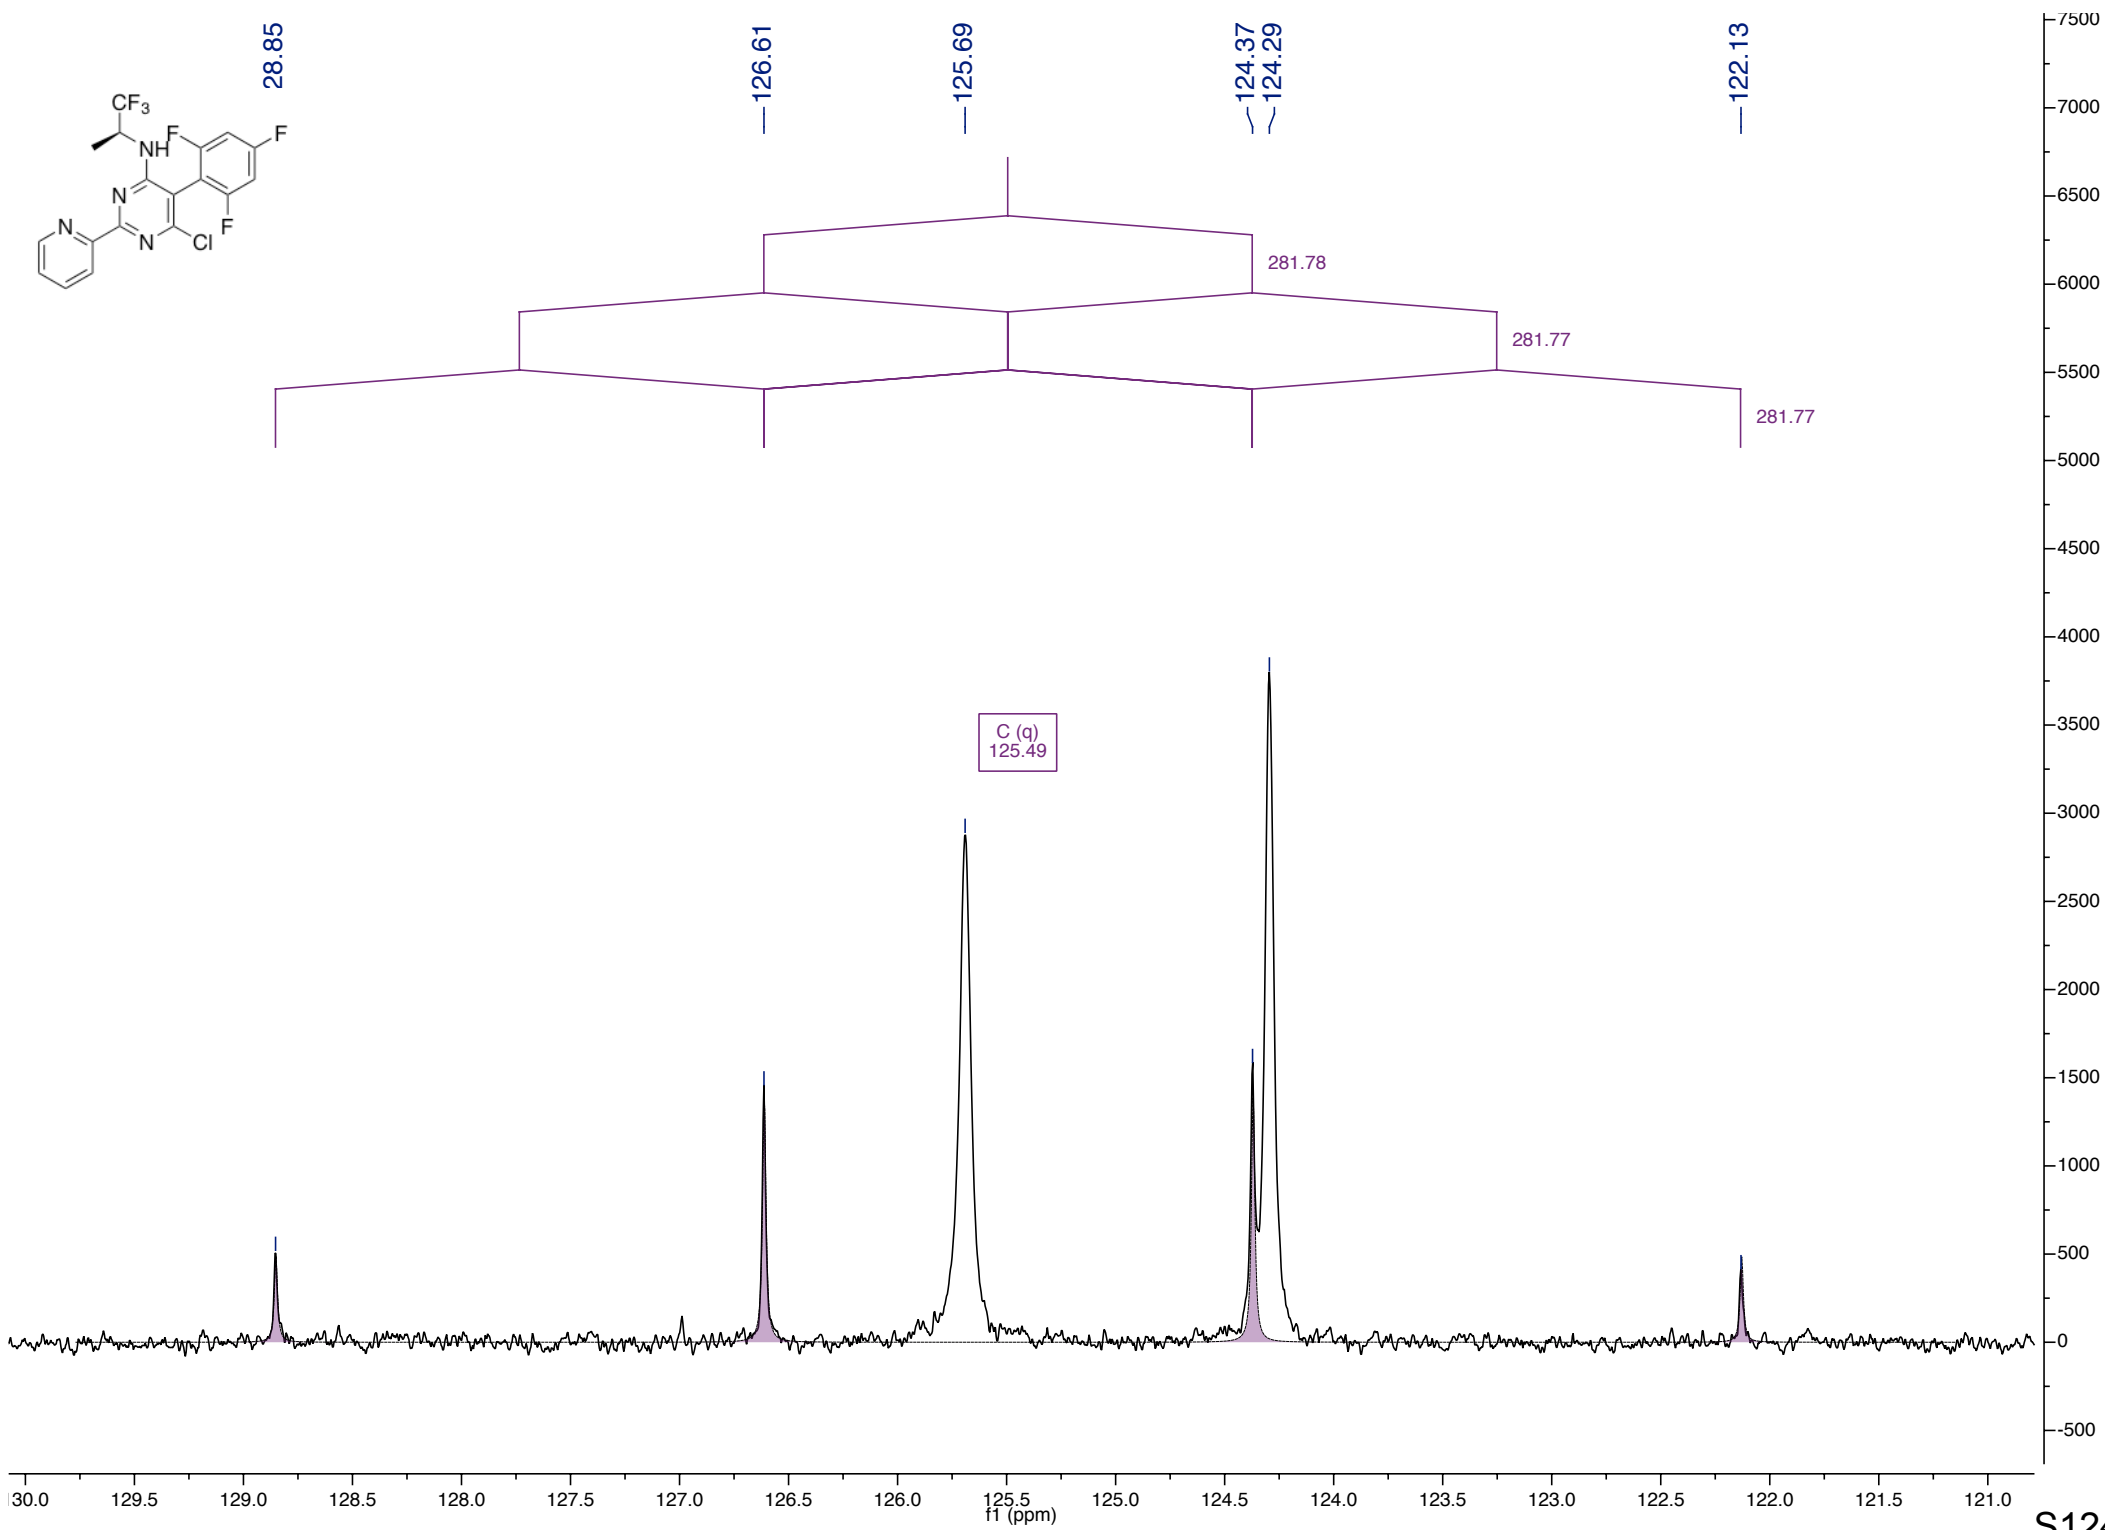



105.29  
105.25  
105.12  
105.08  
104.95  
104.92

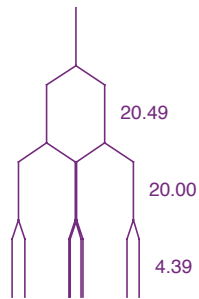

104.17

102.04  
102.01  
101.90  
101.87  
101.84  
101.81  
101.69  
101.66  
101.63  
101.60  
101.49  
101.46

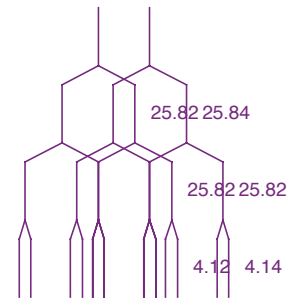

D (td)  
105.10

E (td)  
101.82

F (td)  
101.68

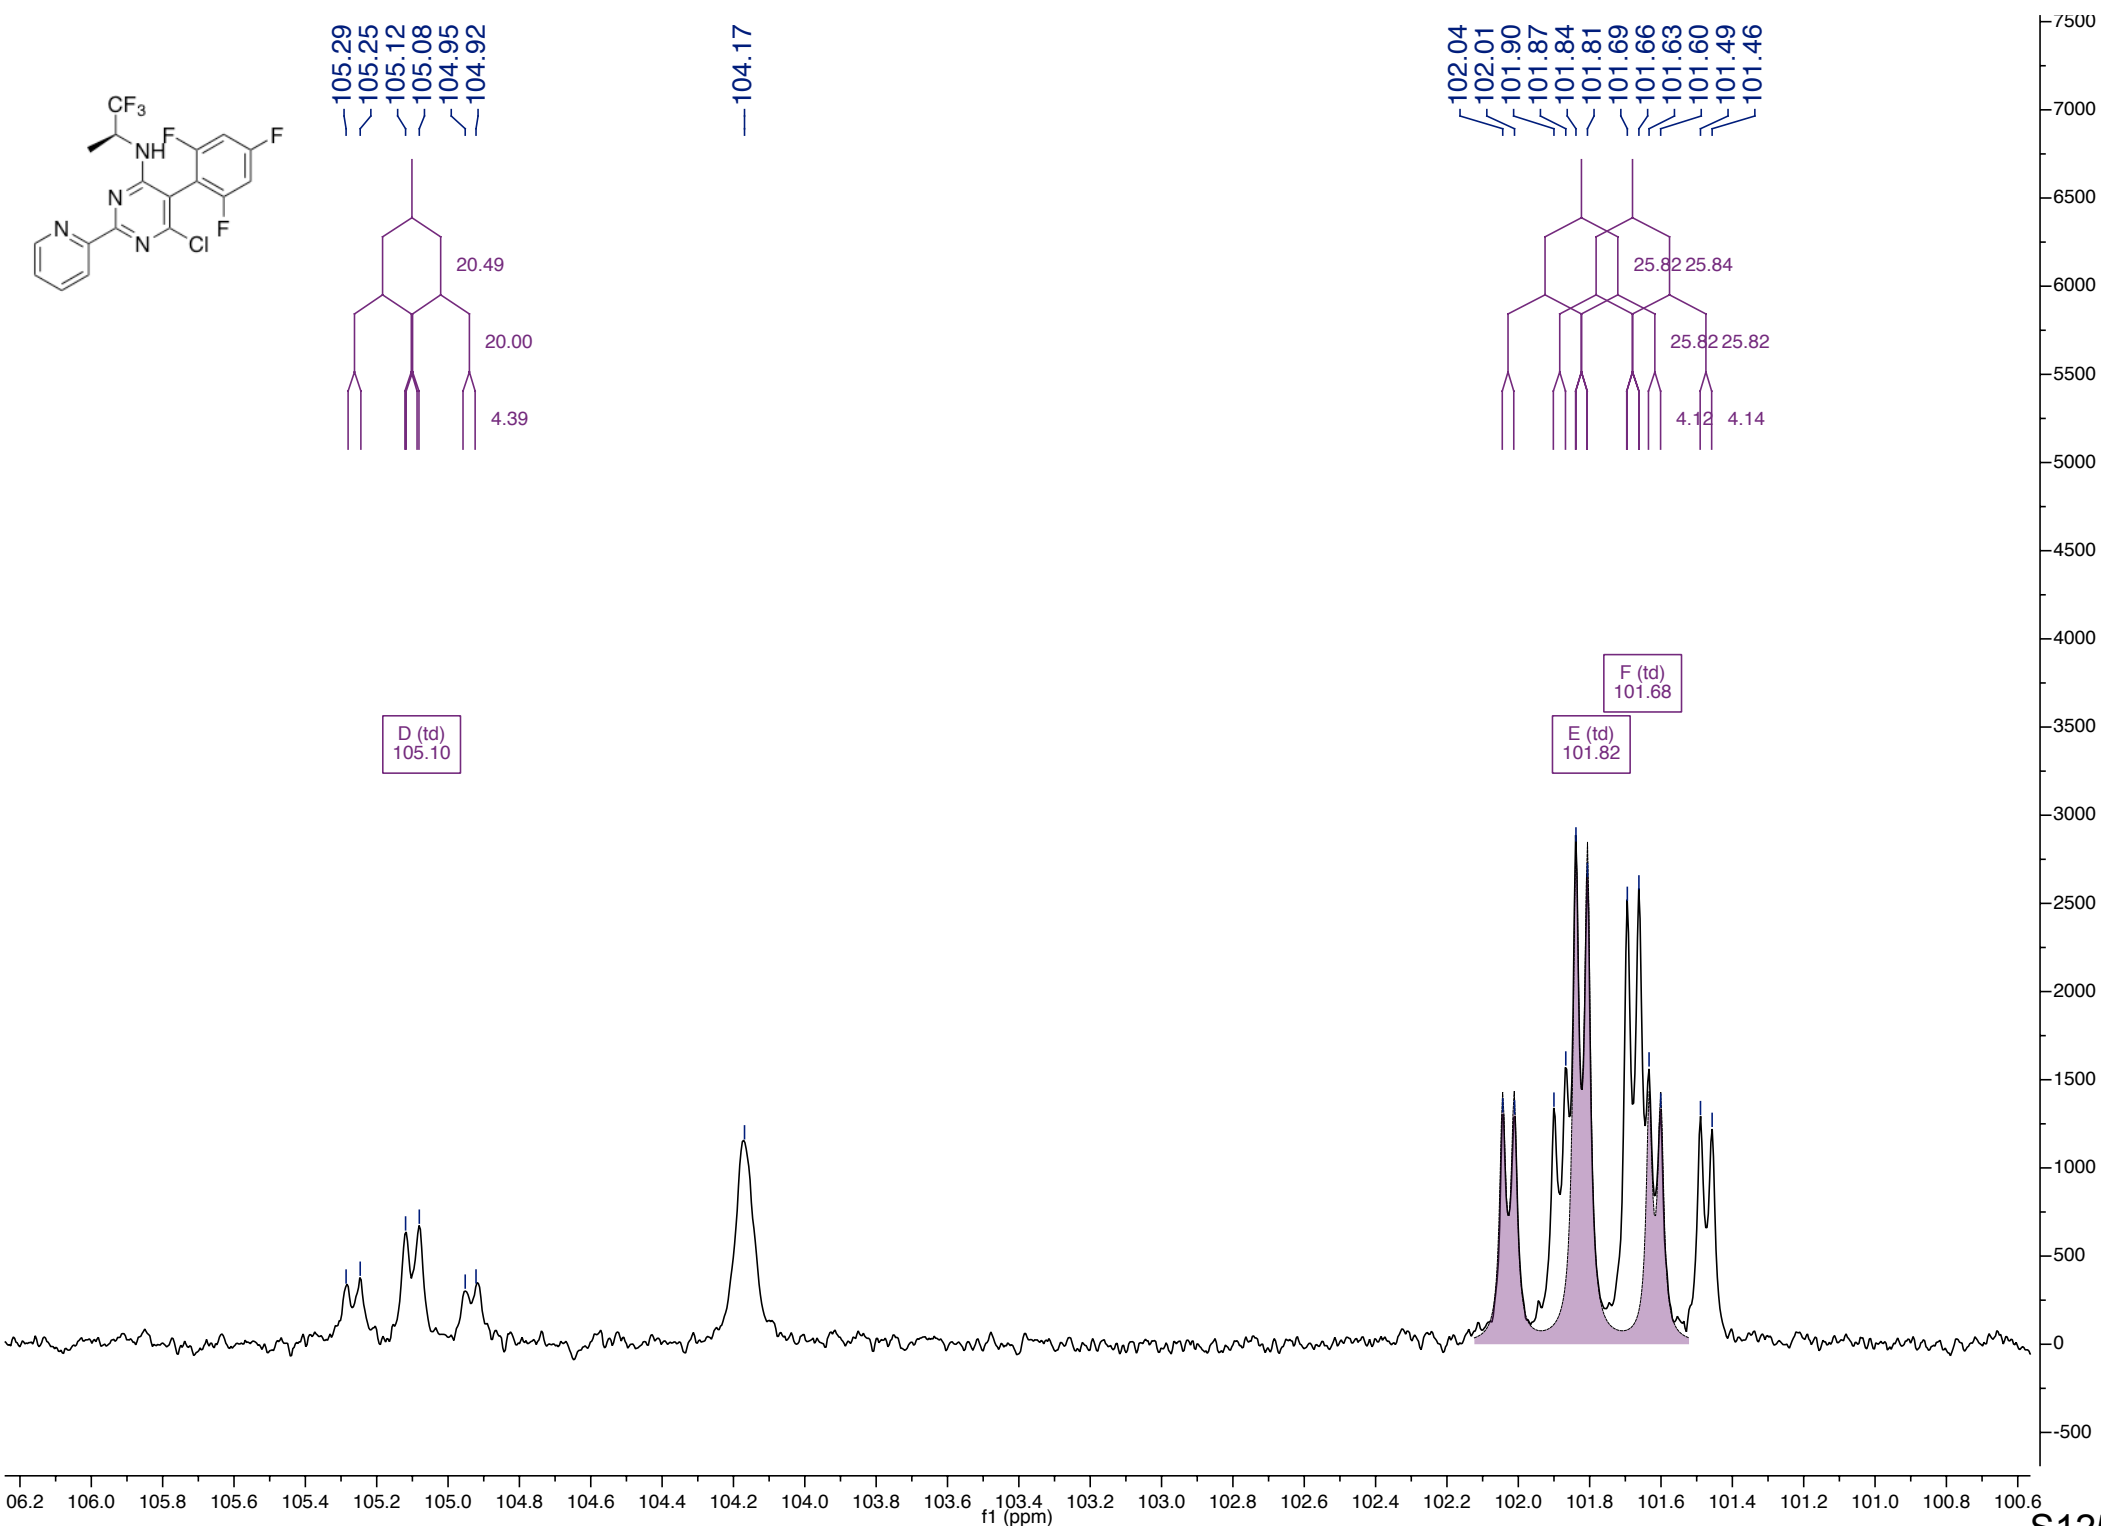



105.29  
105.25  
105.12  
105.08  
104.95  
104.92

104.17

102.04  
102.01  
101.90  
101.87  
101.84  
101.81  
101.69  
101.66  
101.63  
101.60  
101.49  
101.46

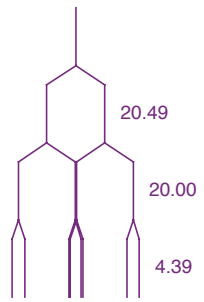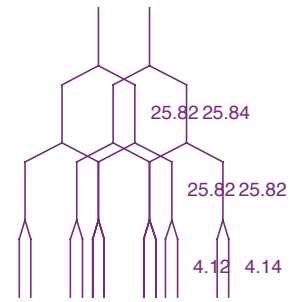

D (td)  
105.10

F (td)  
101.68

E (td)  
101.82

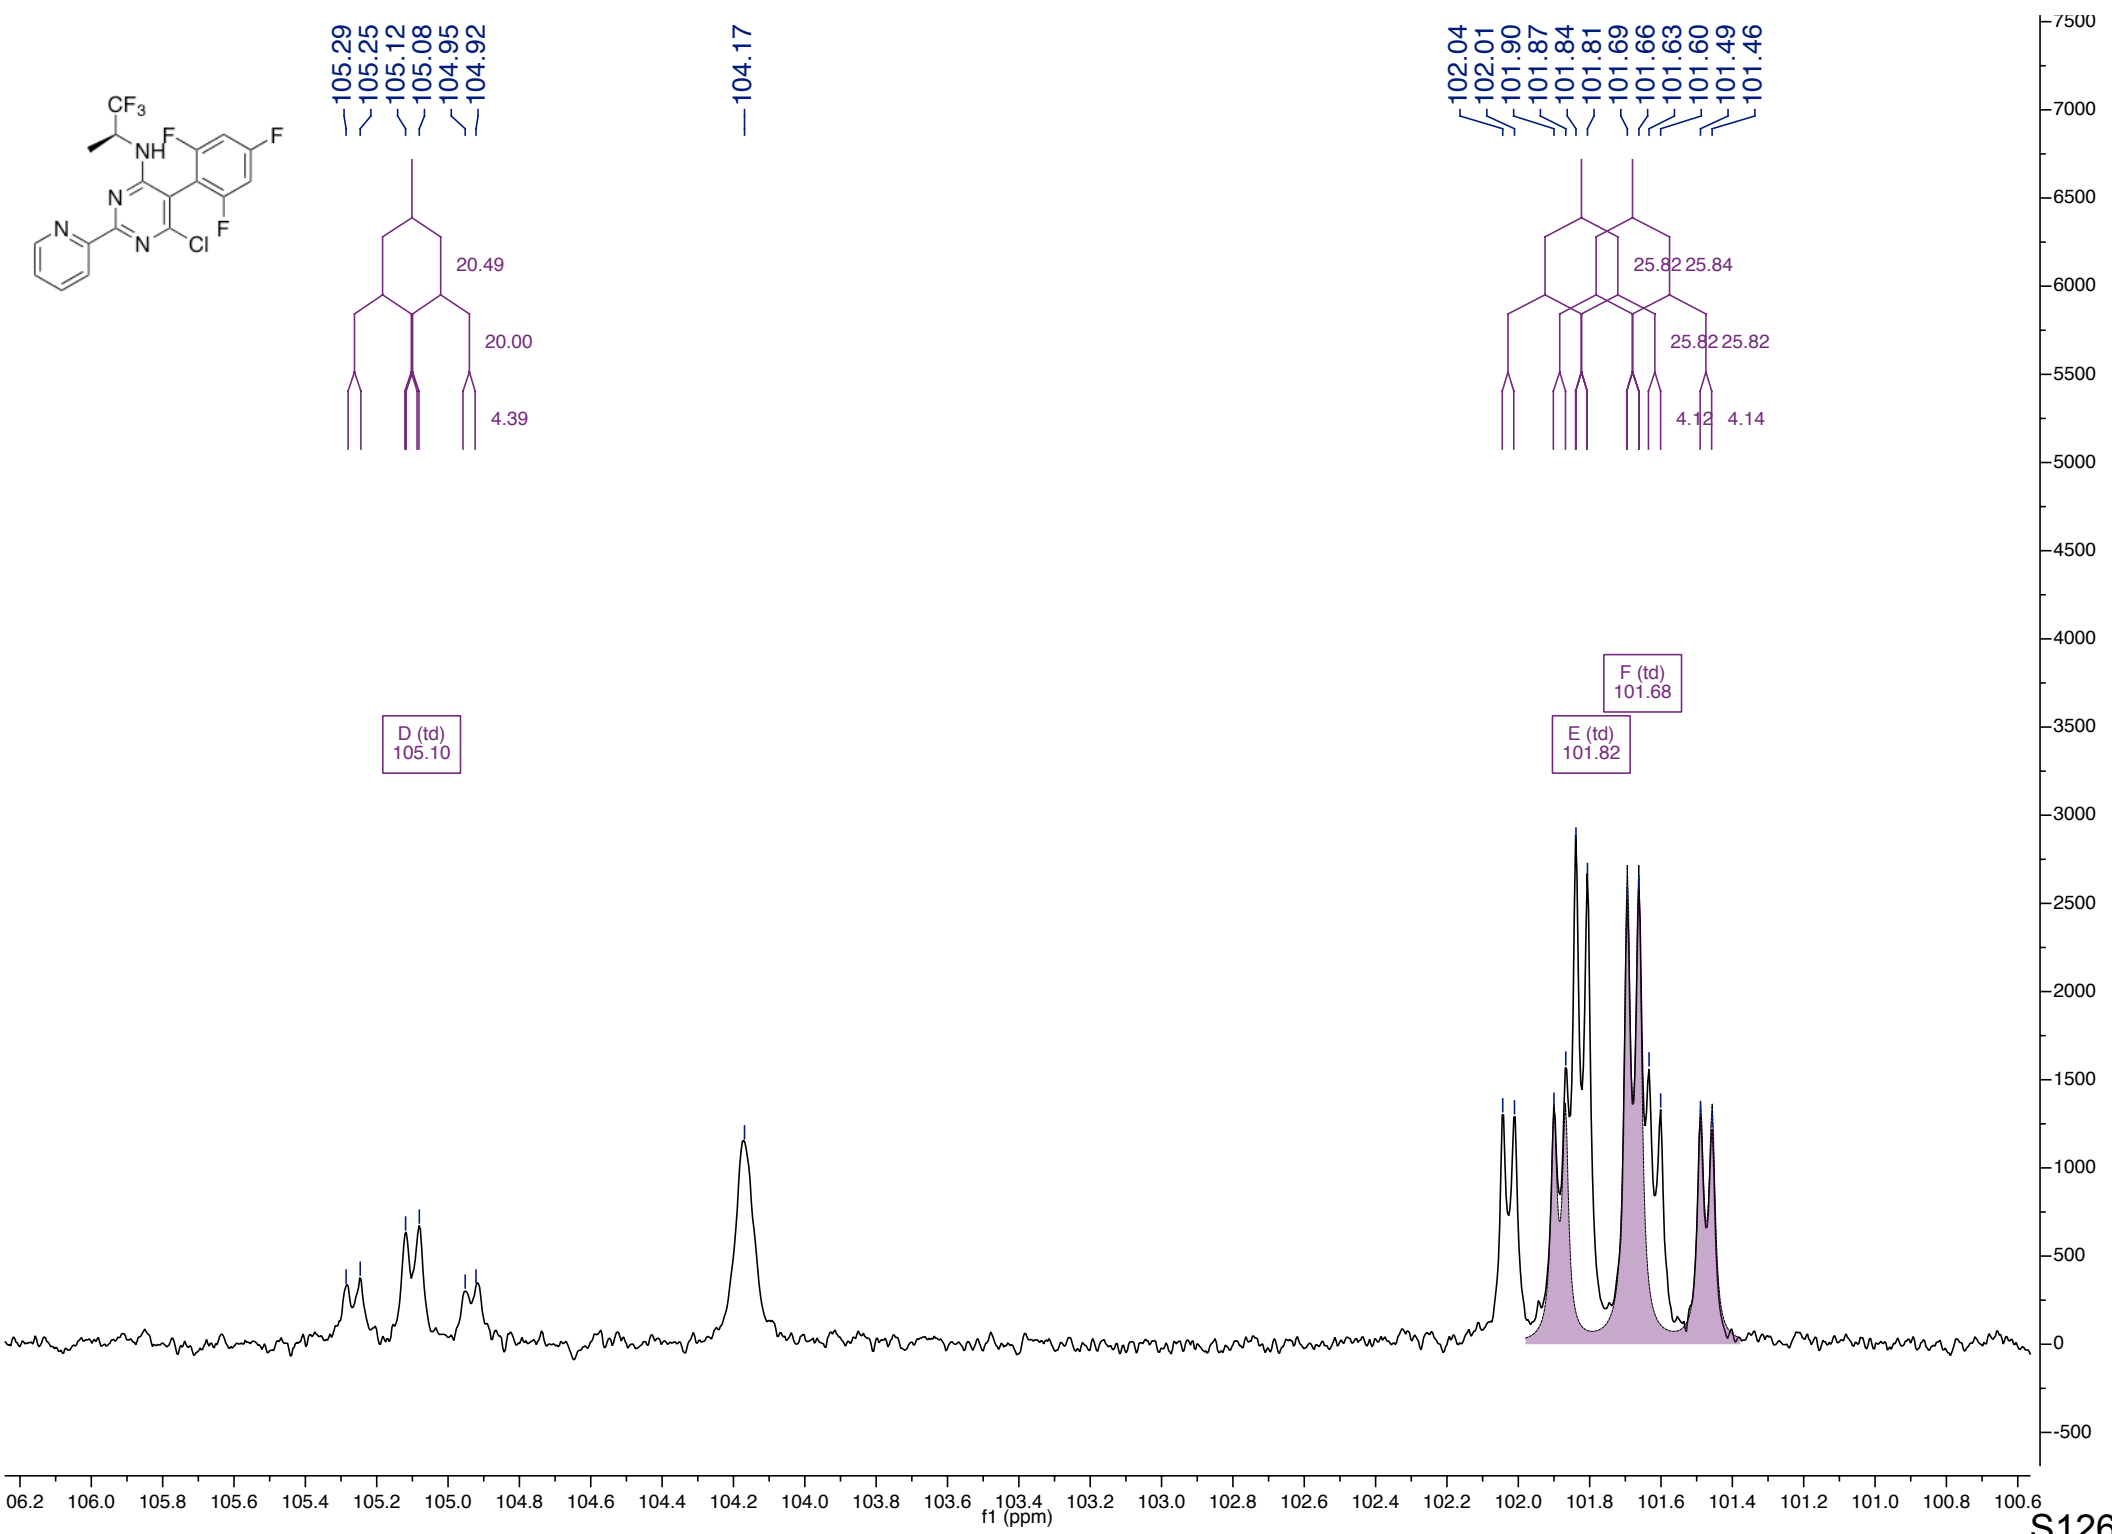

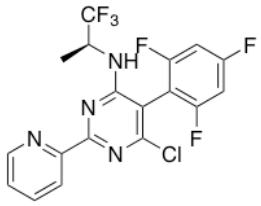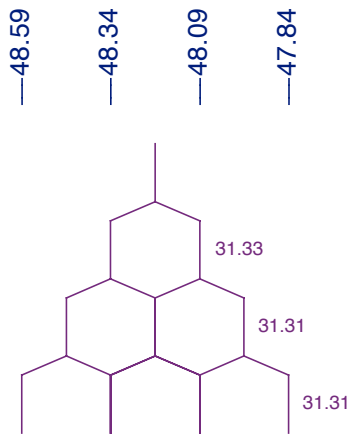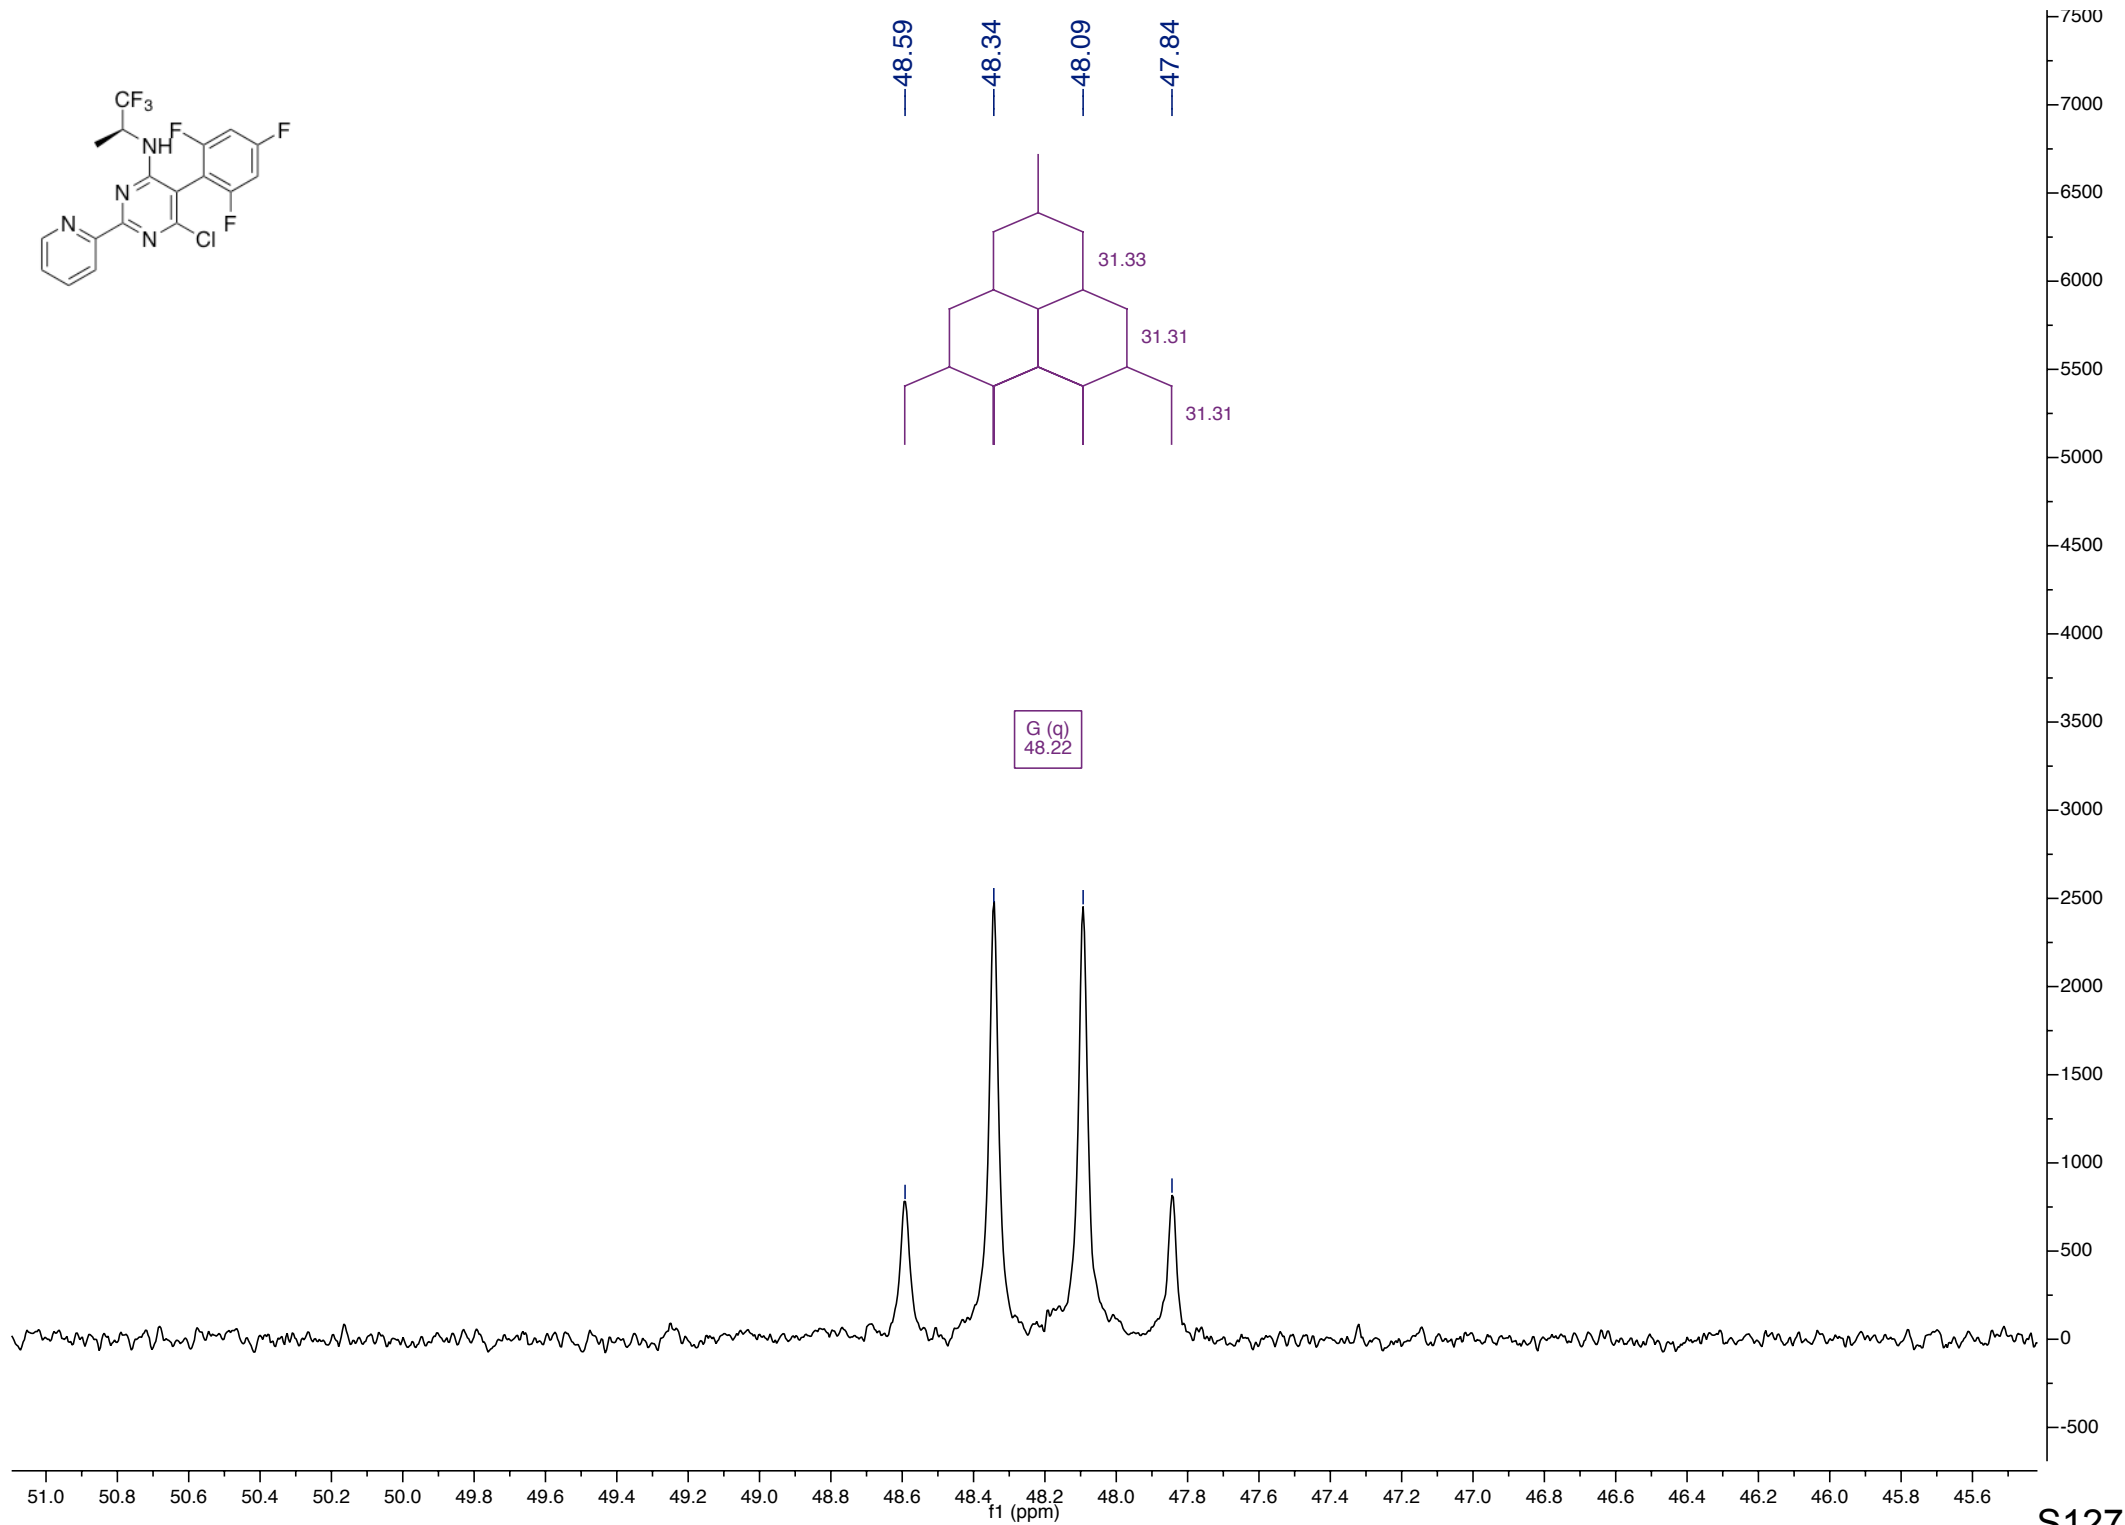

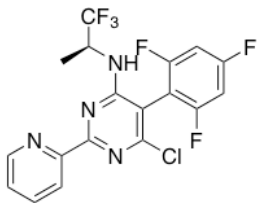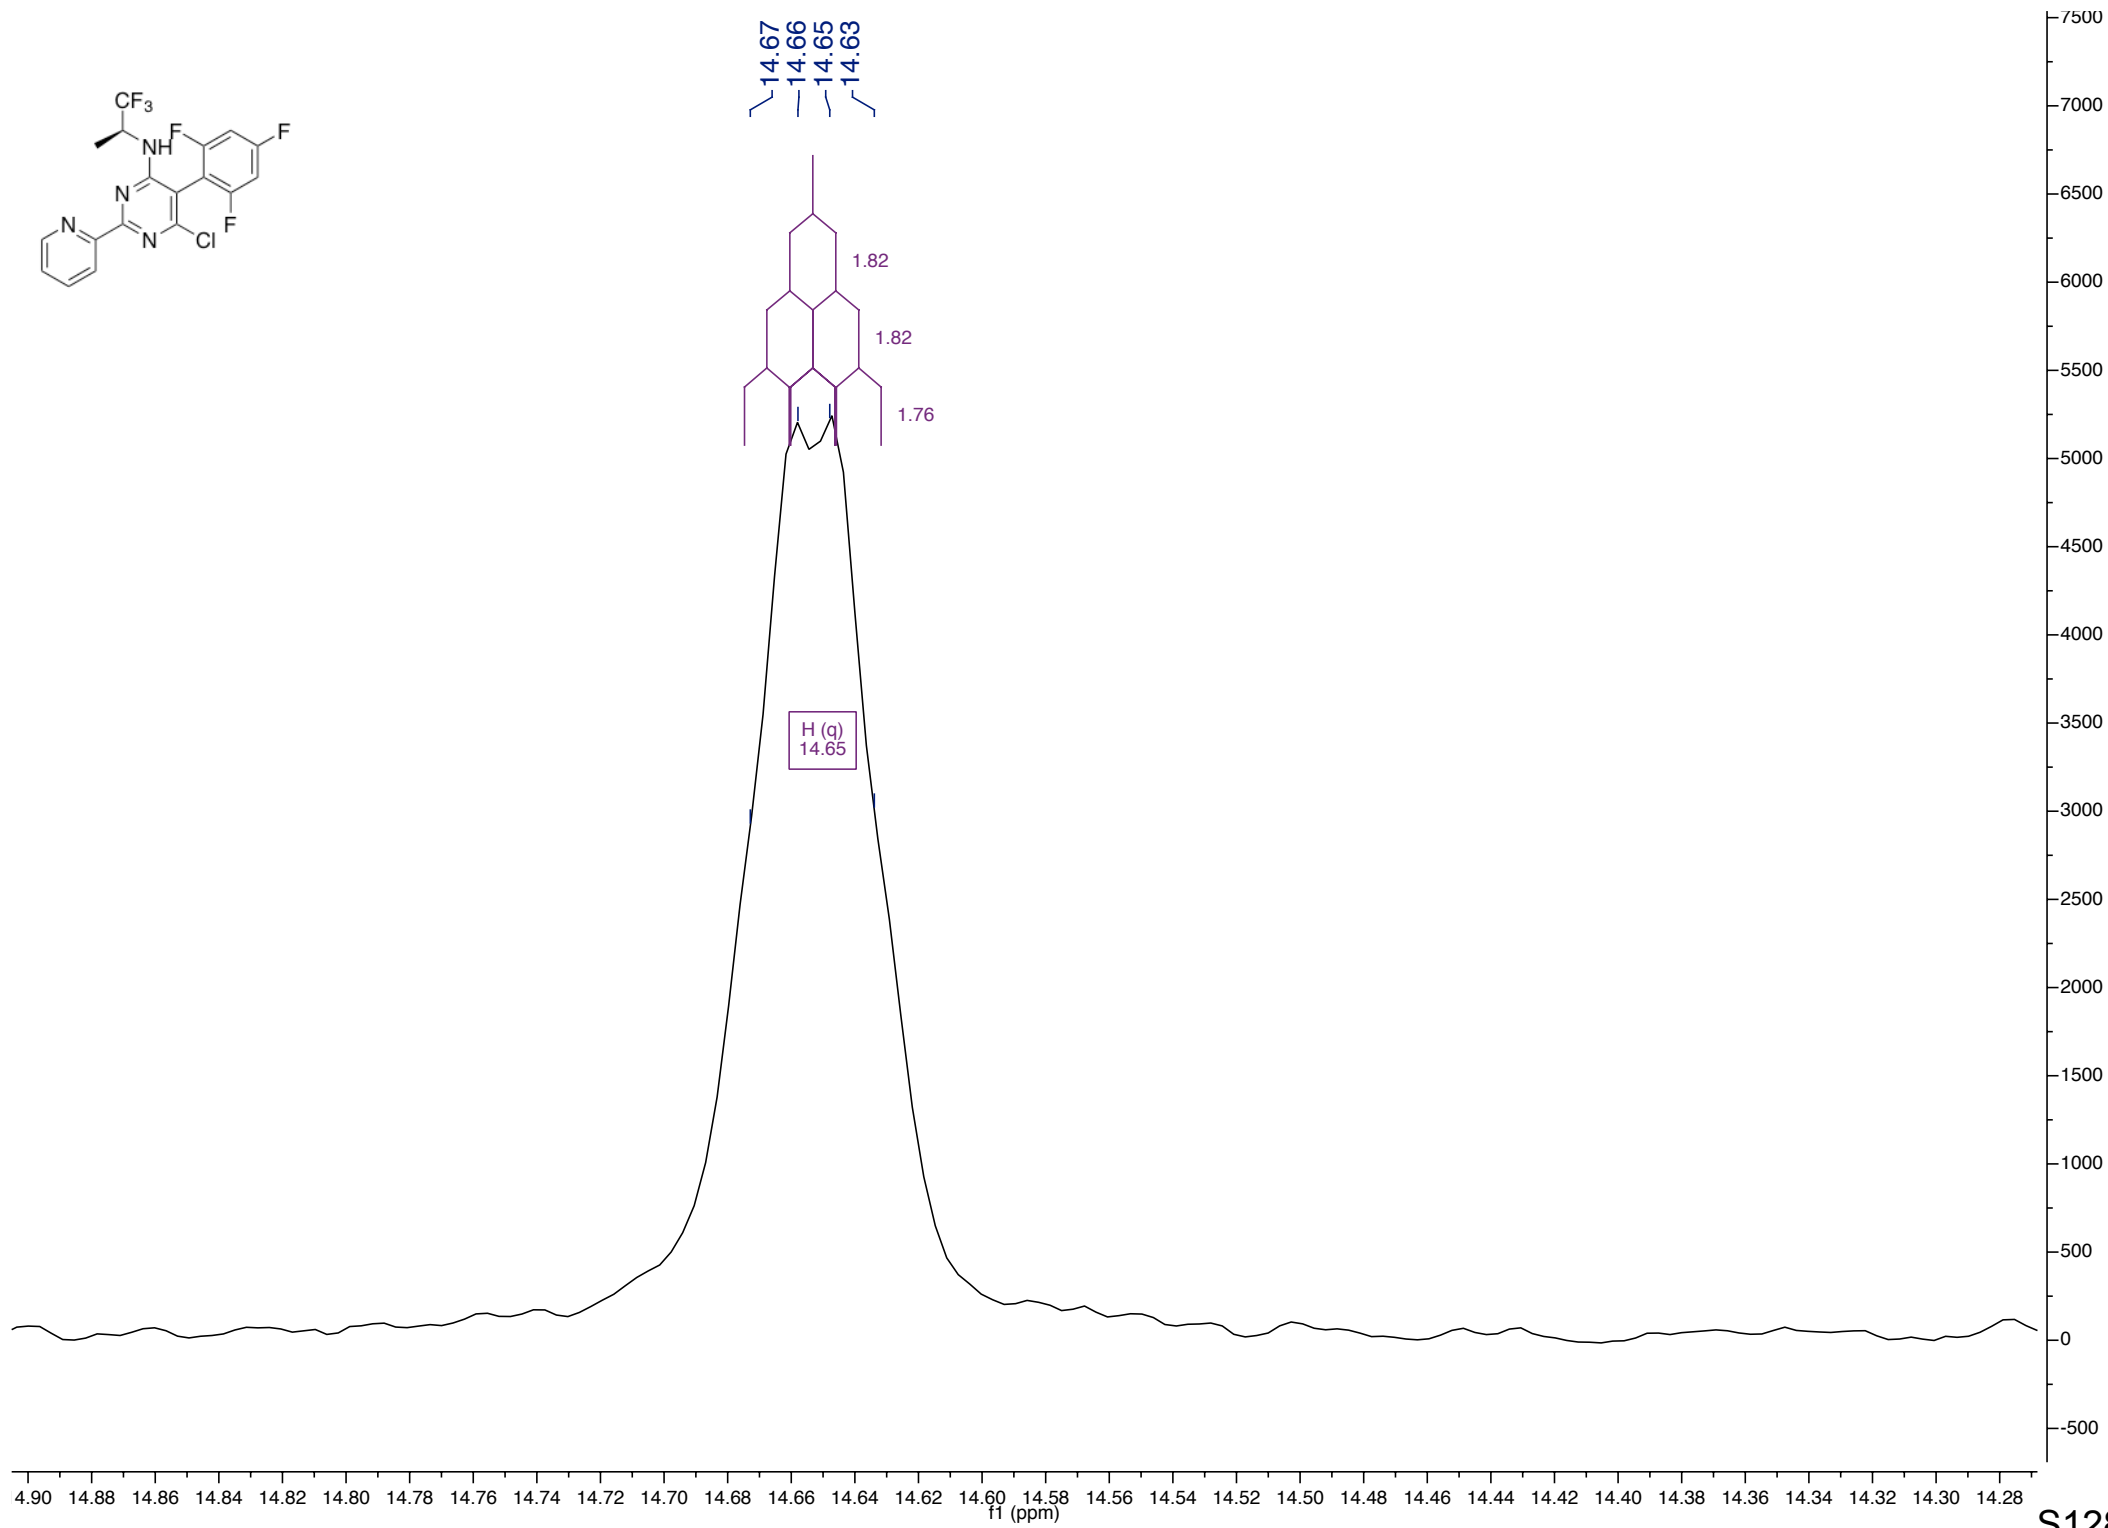



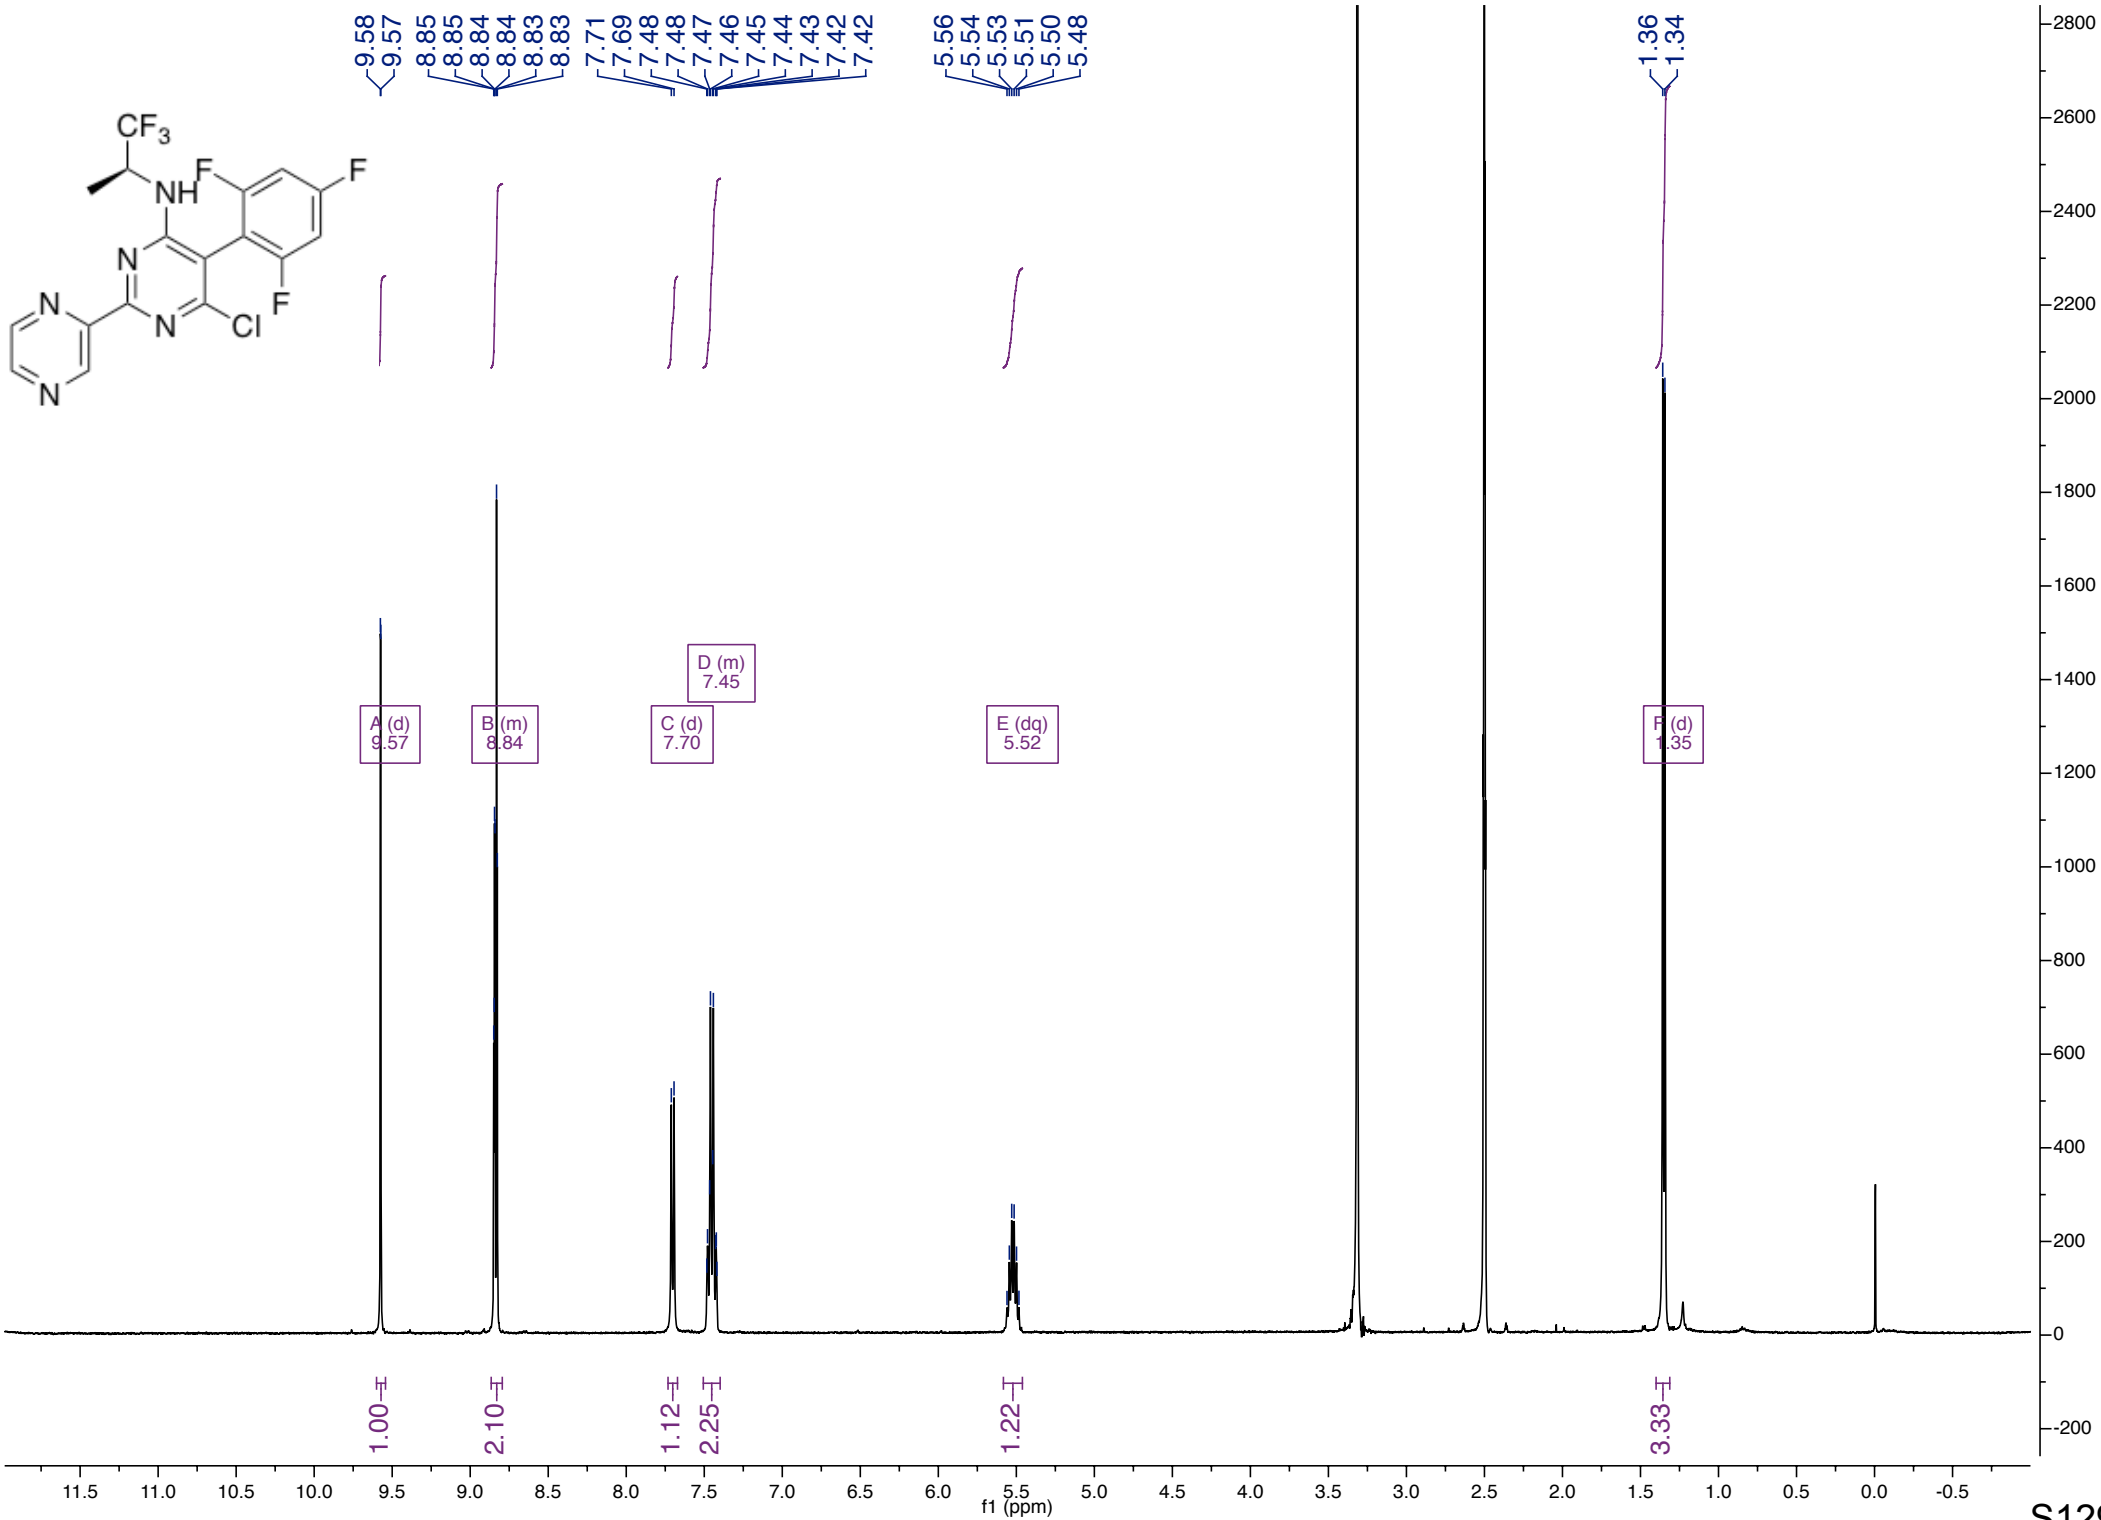

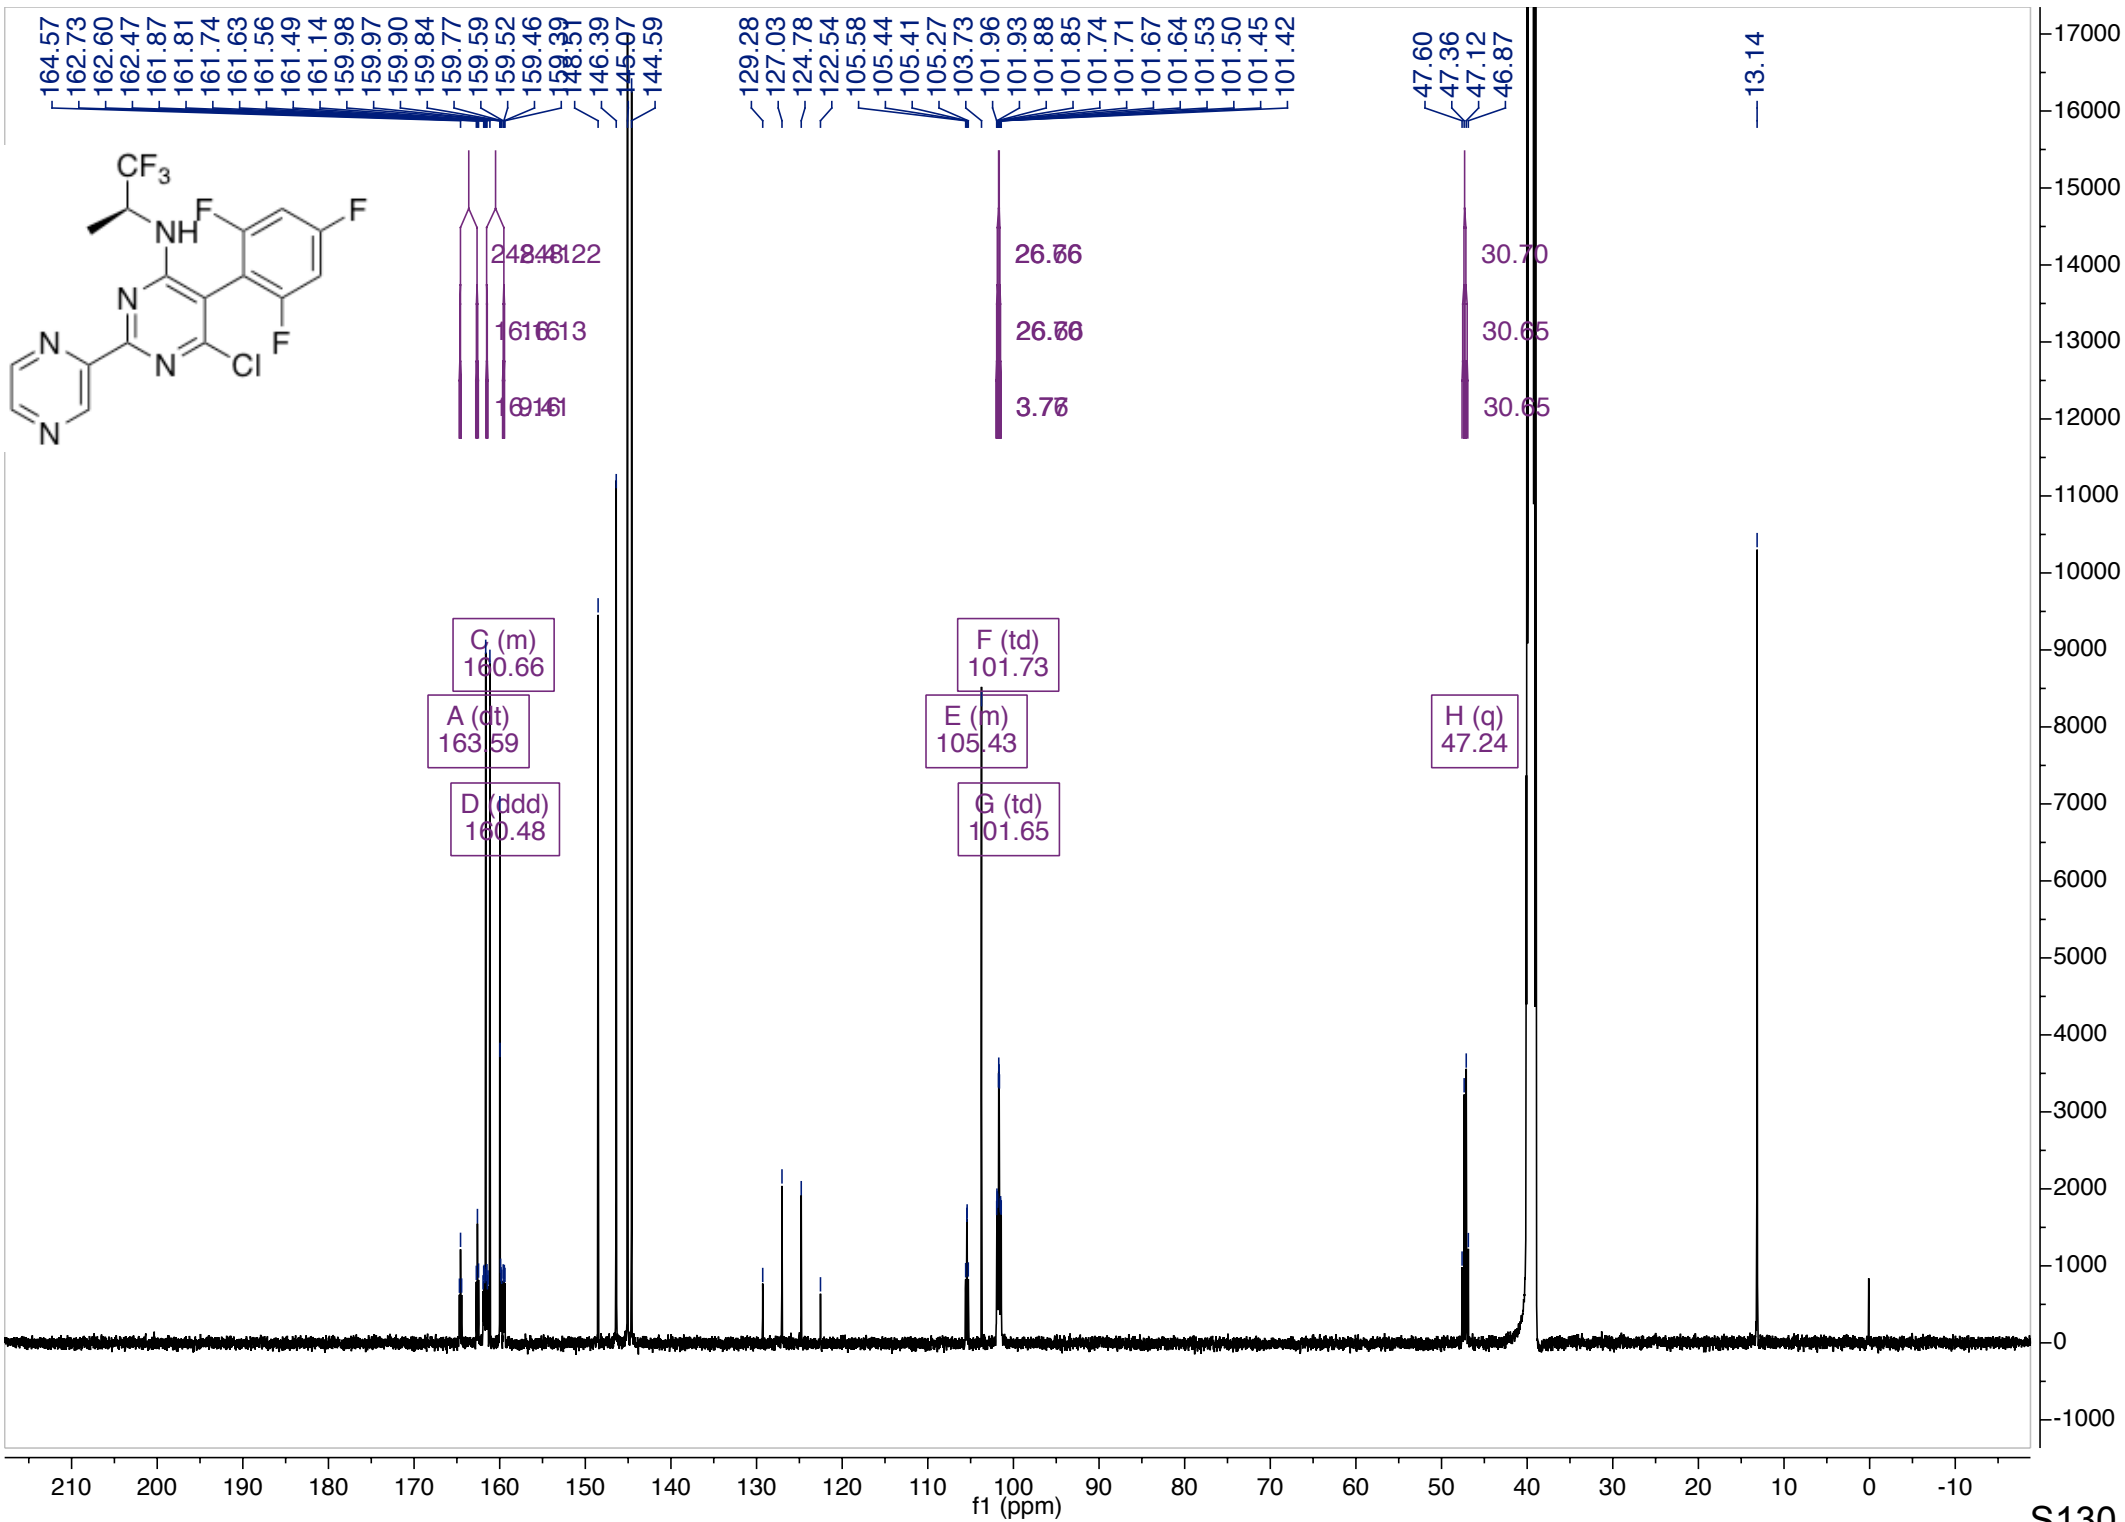

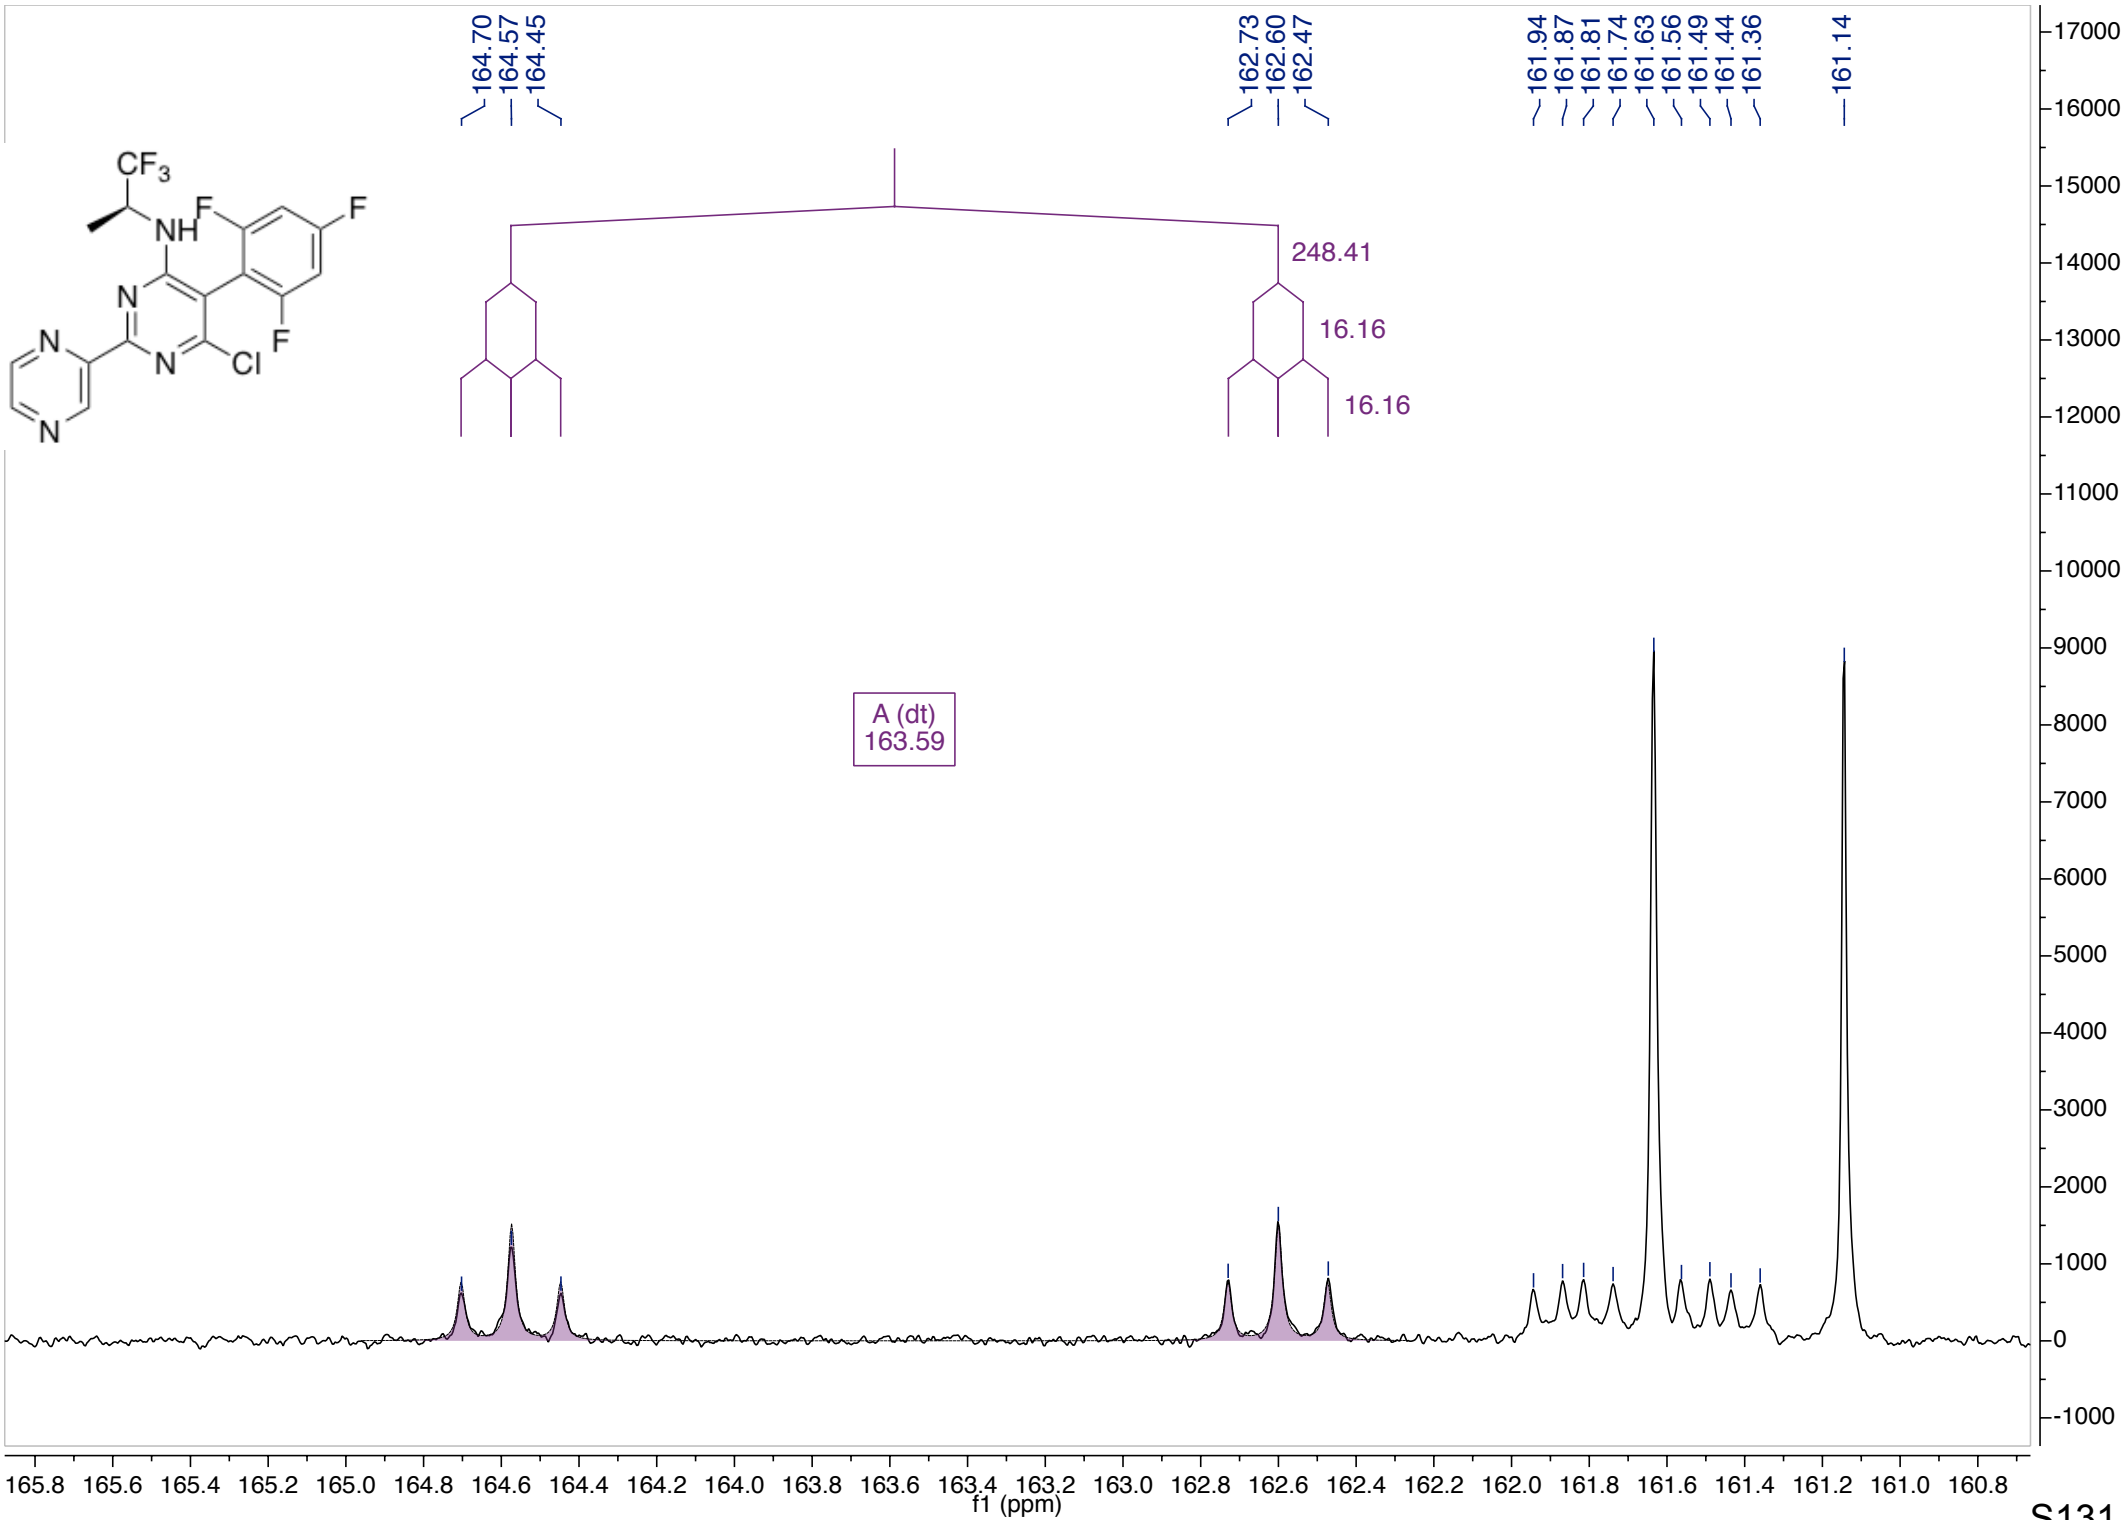

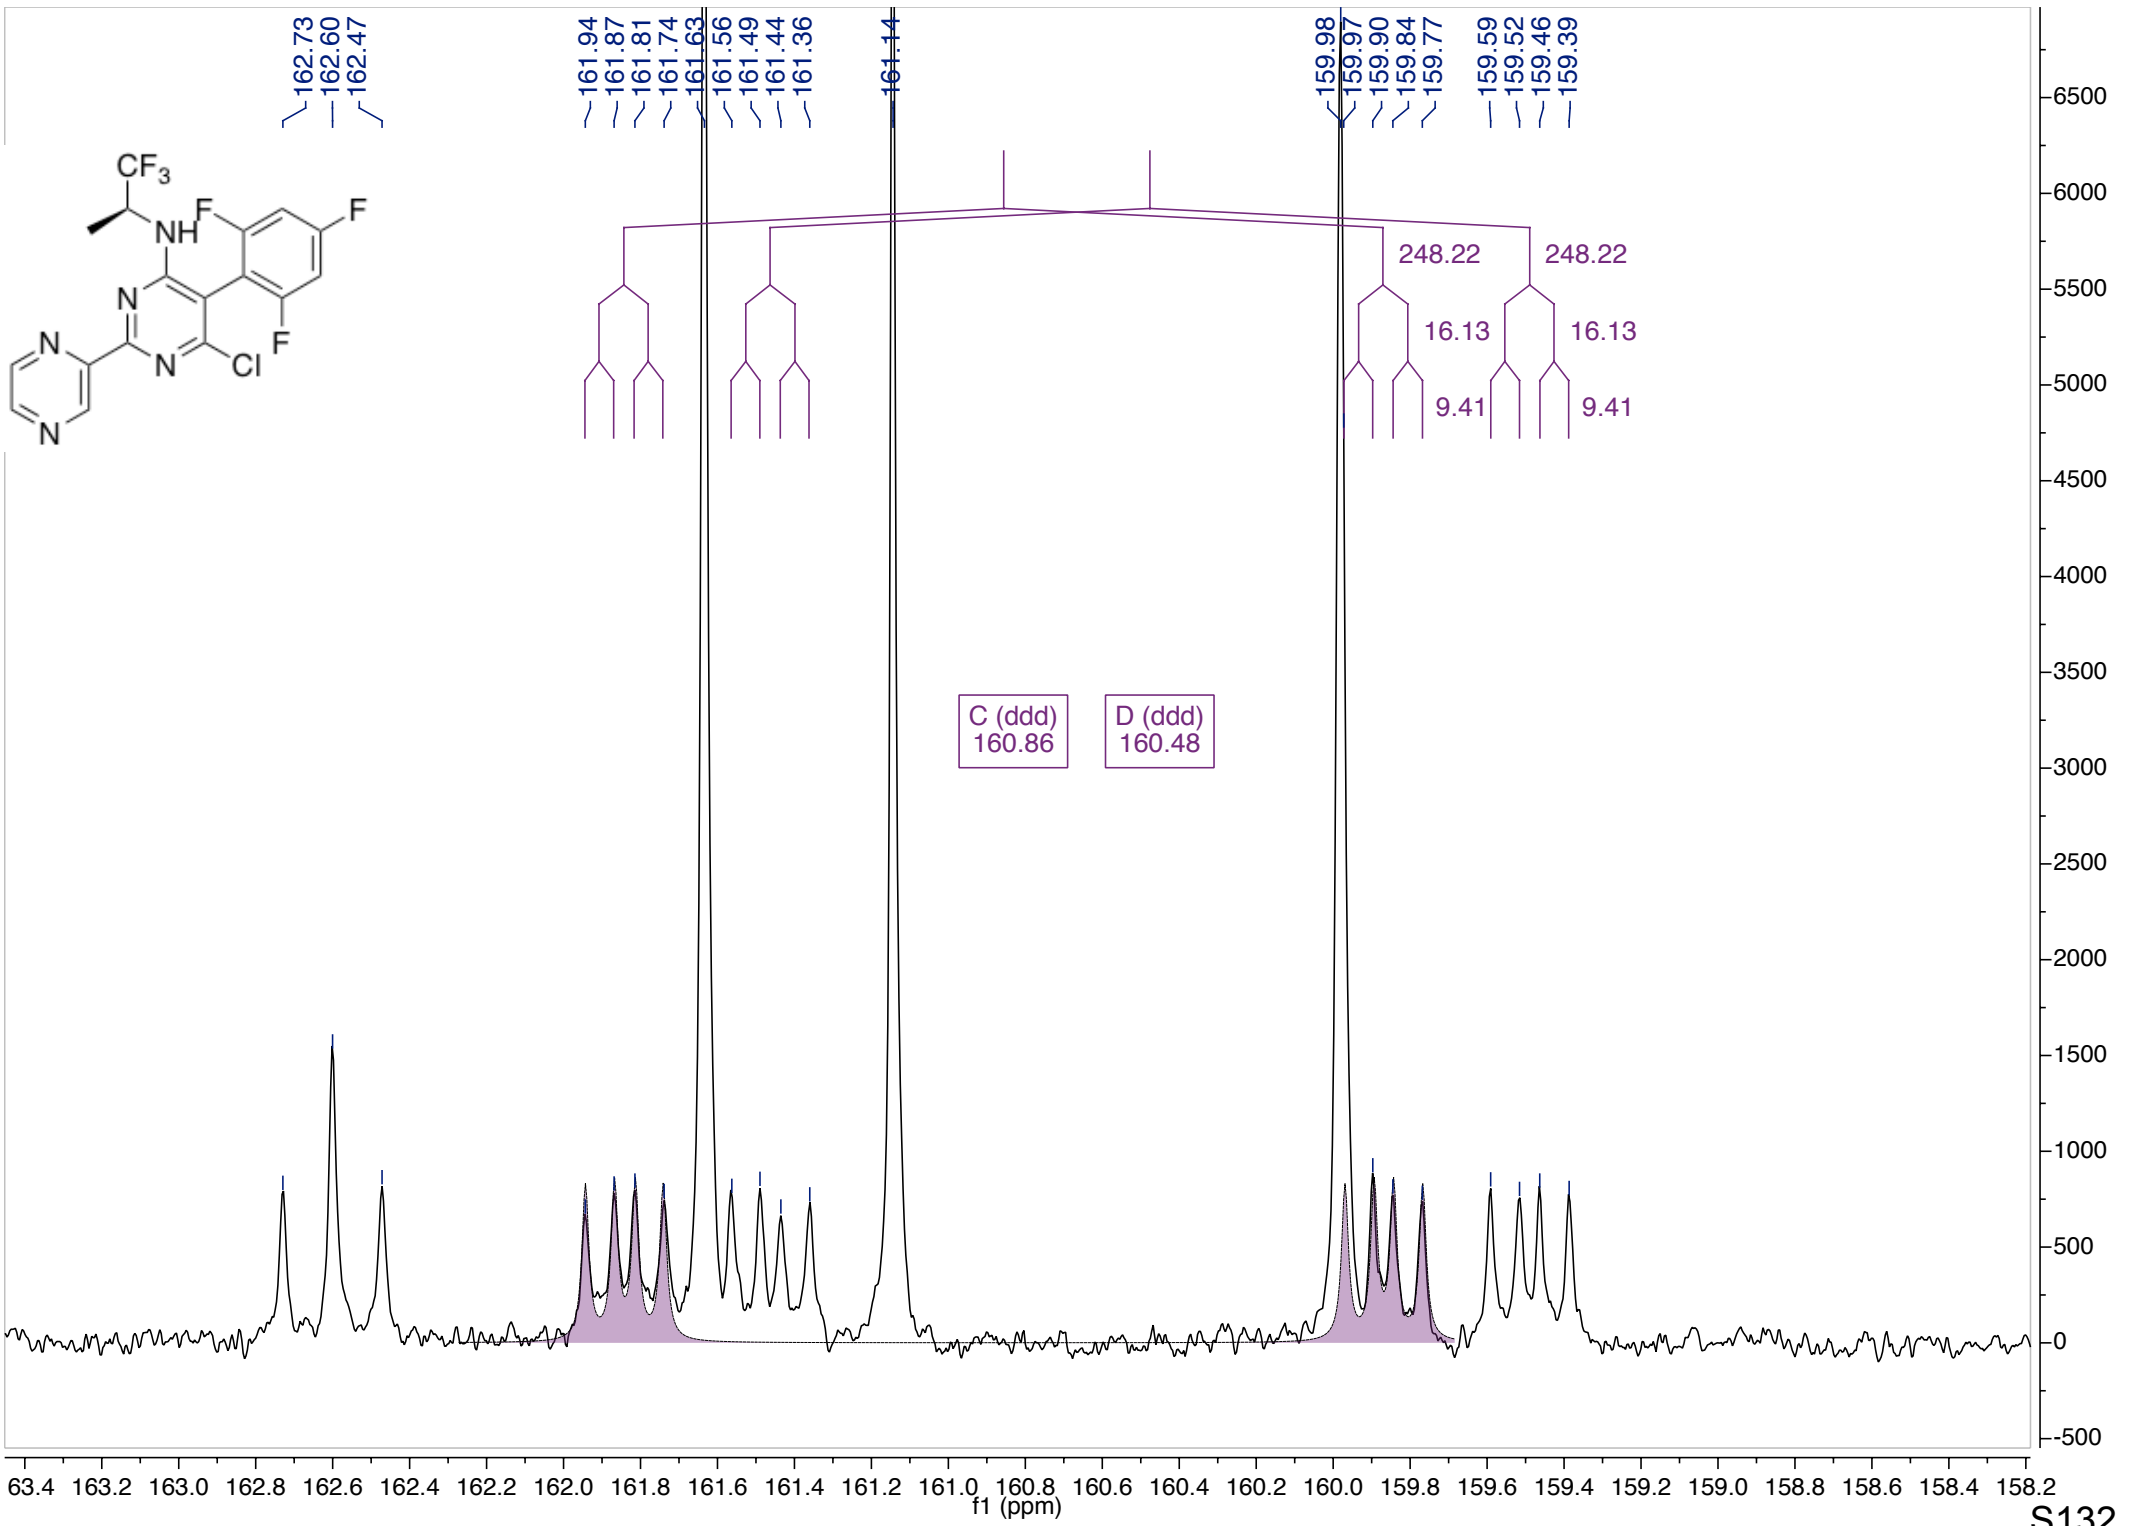

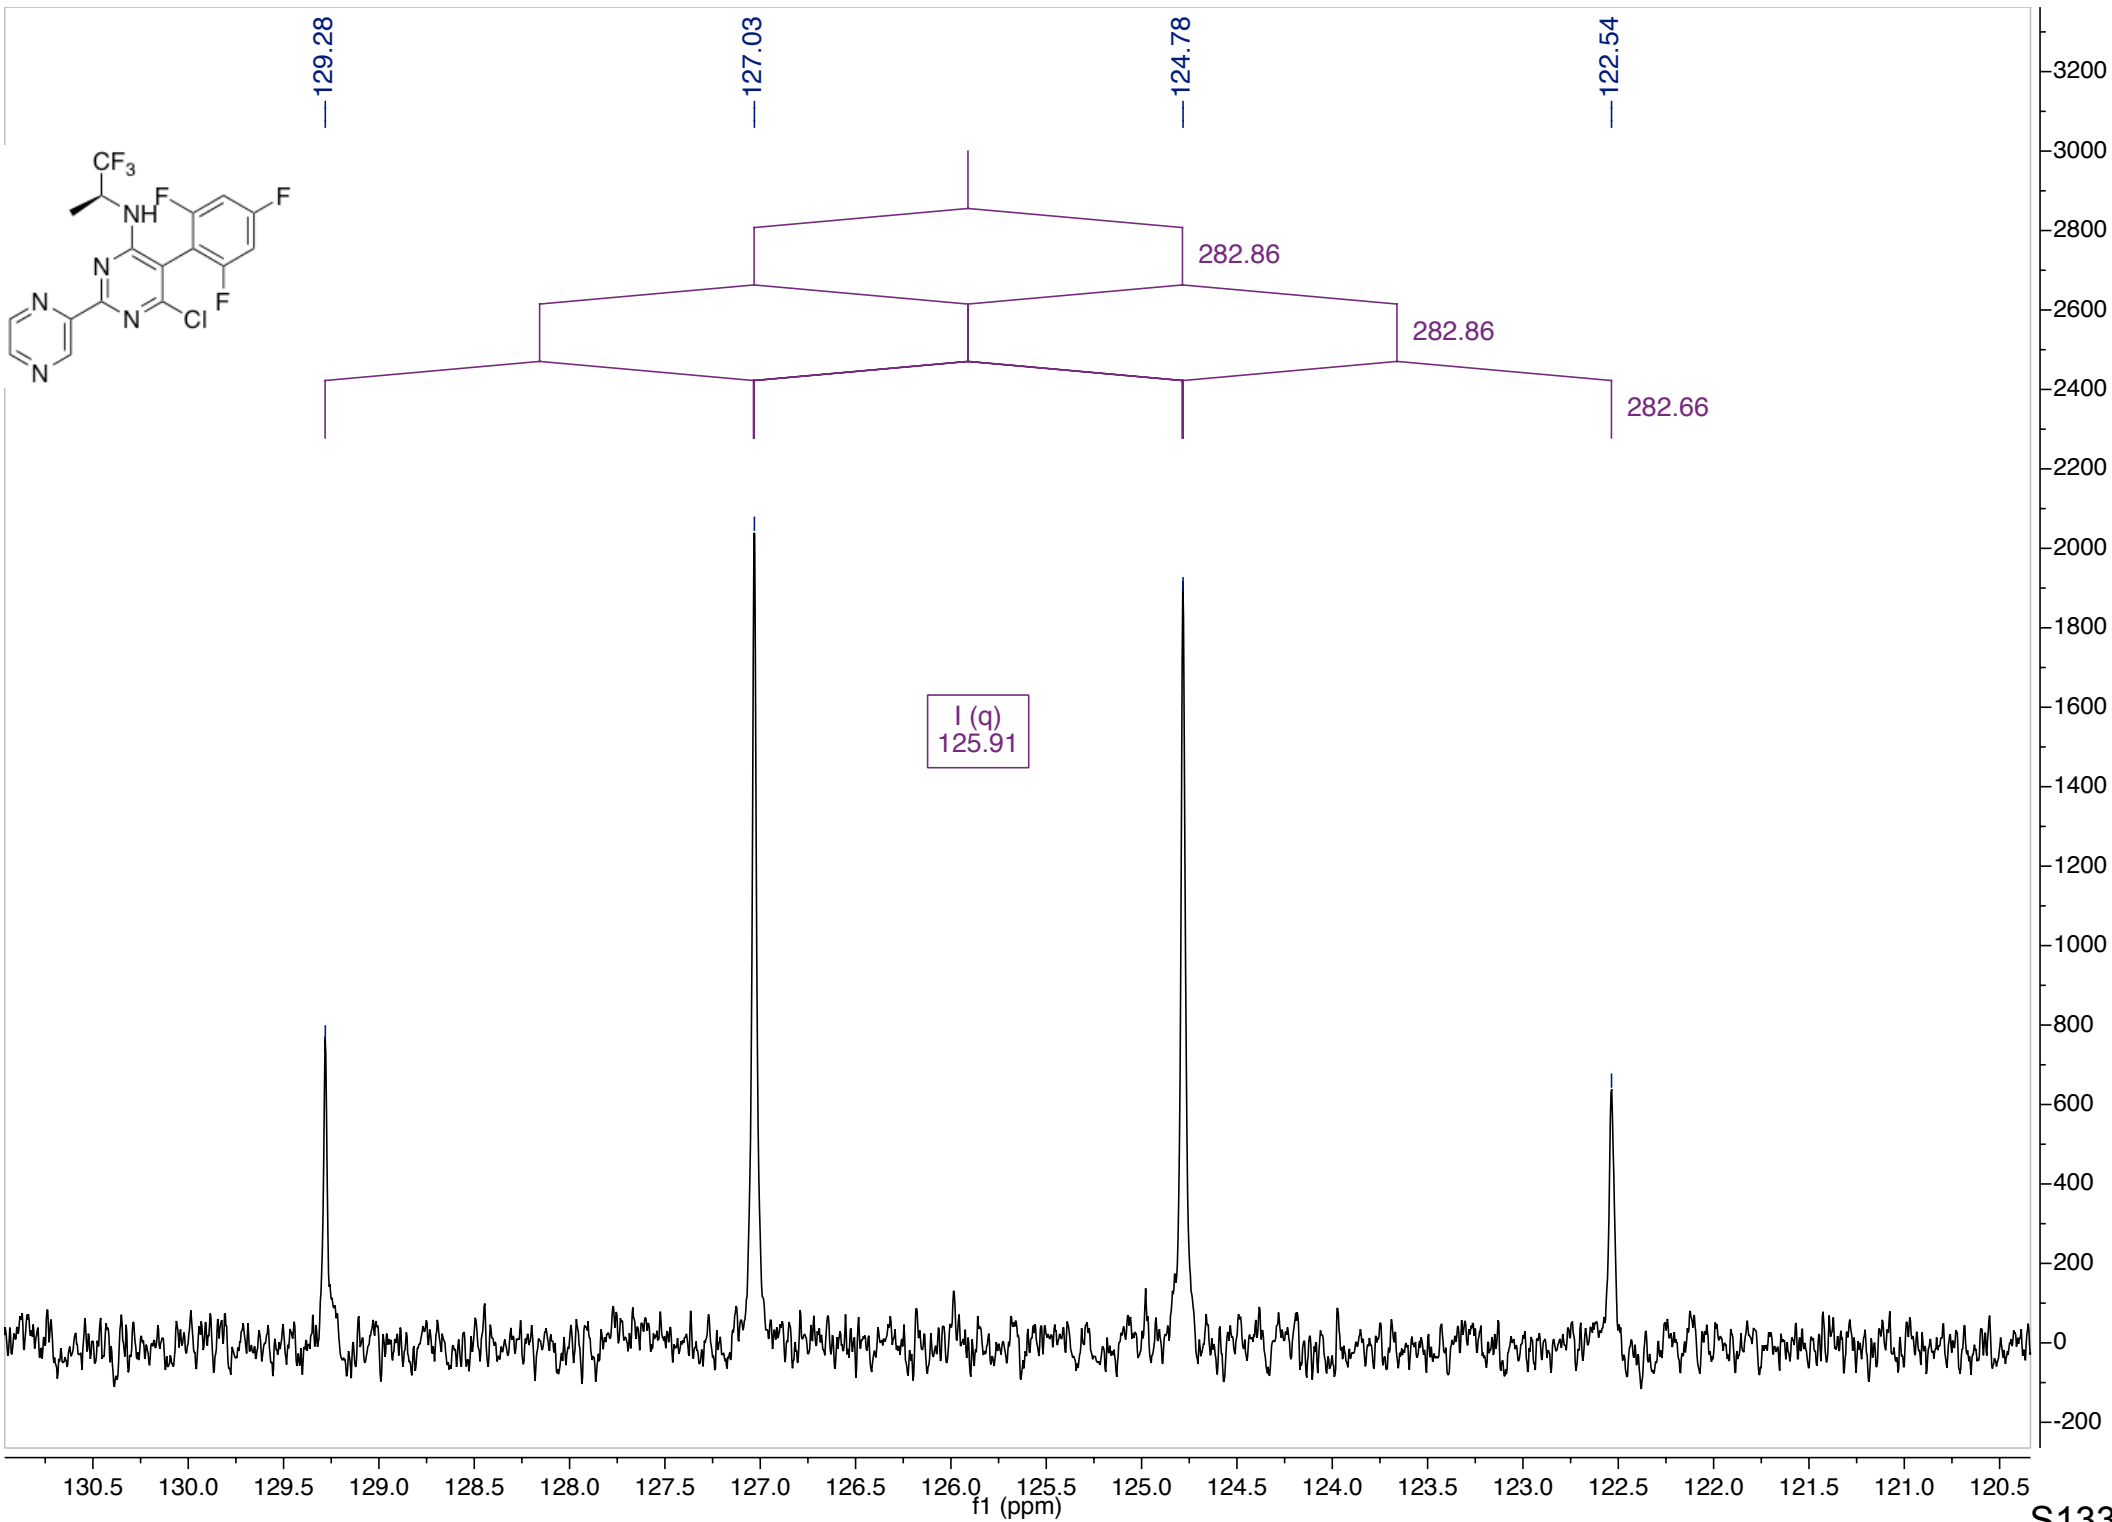

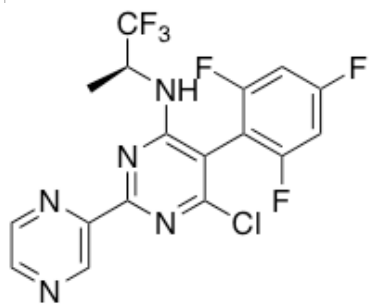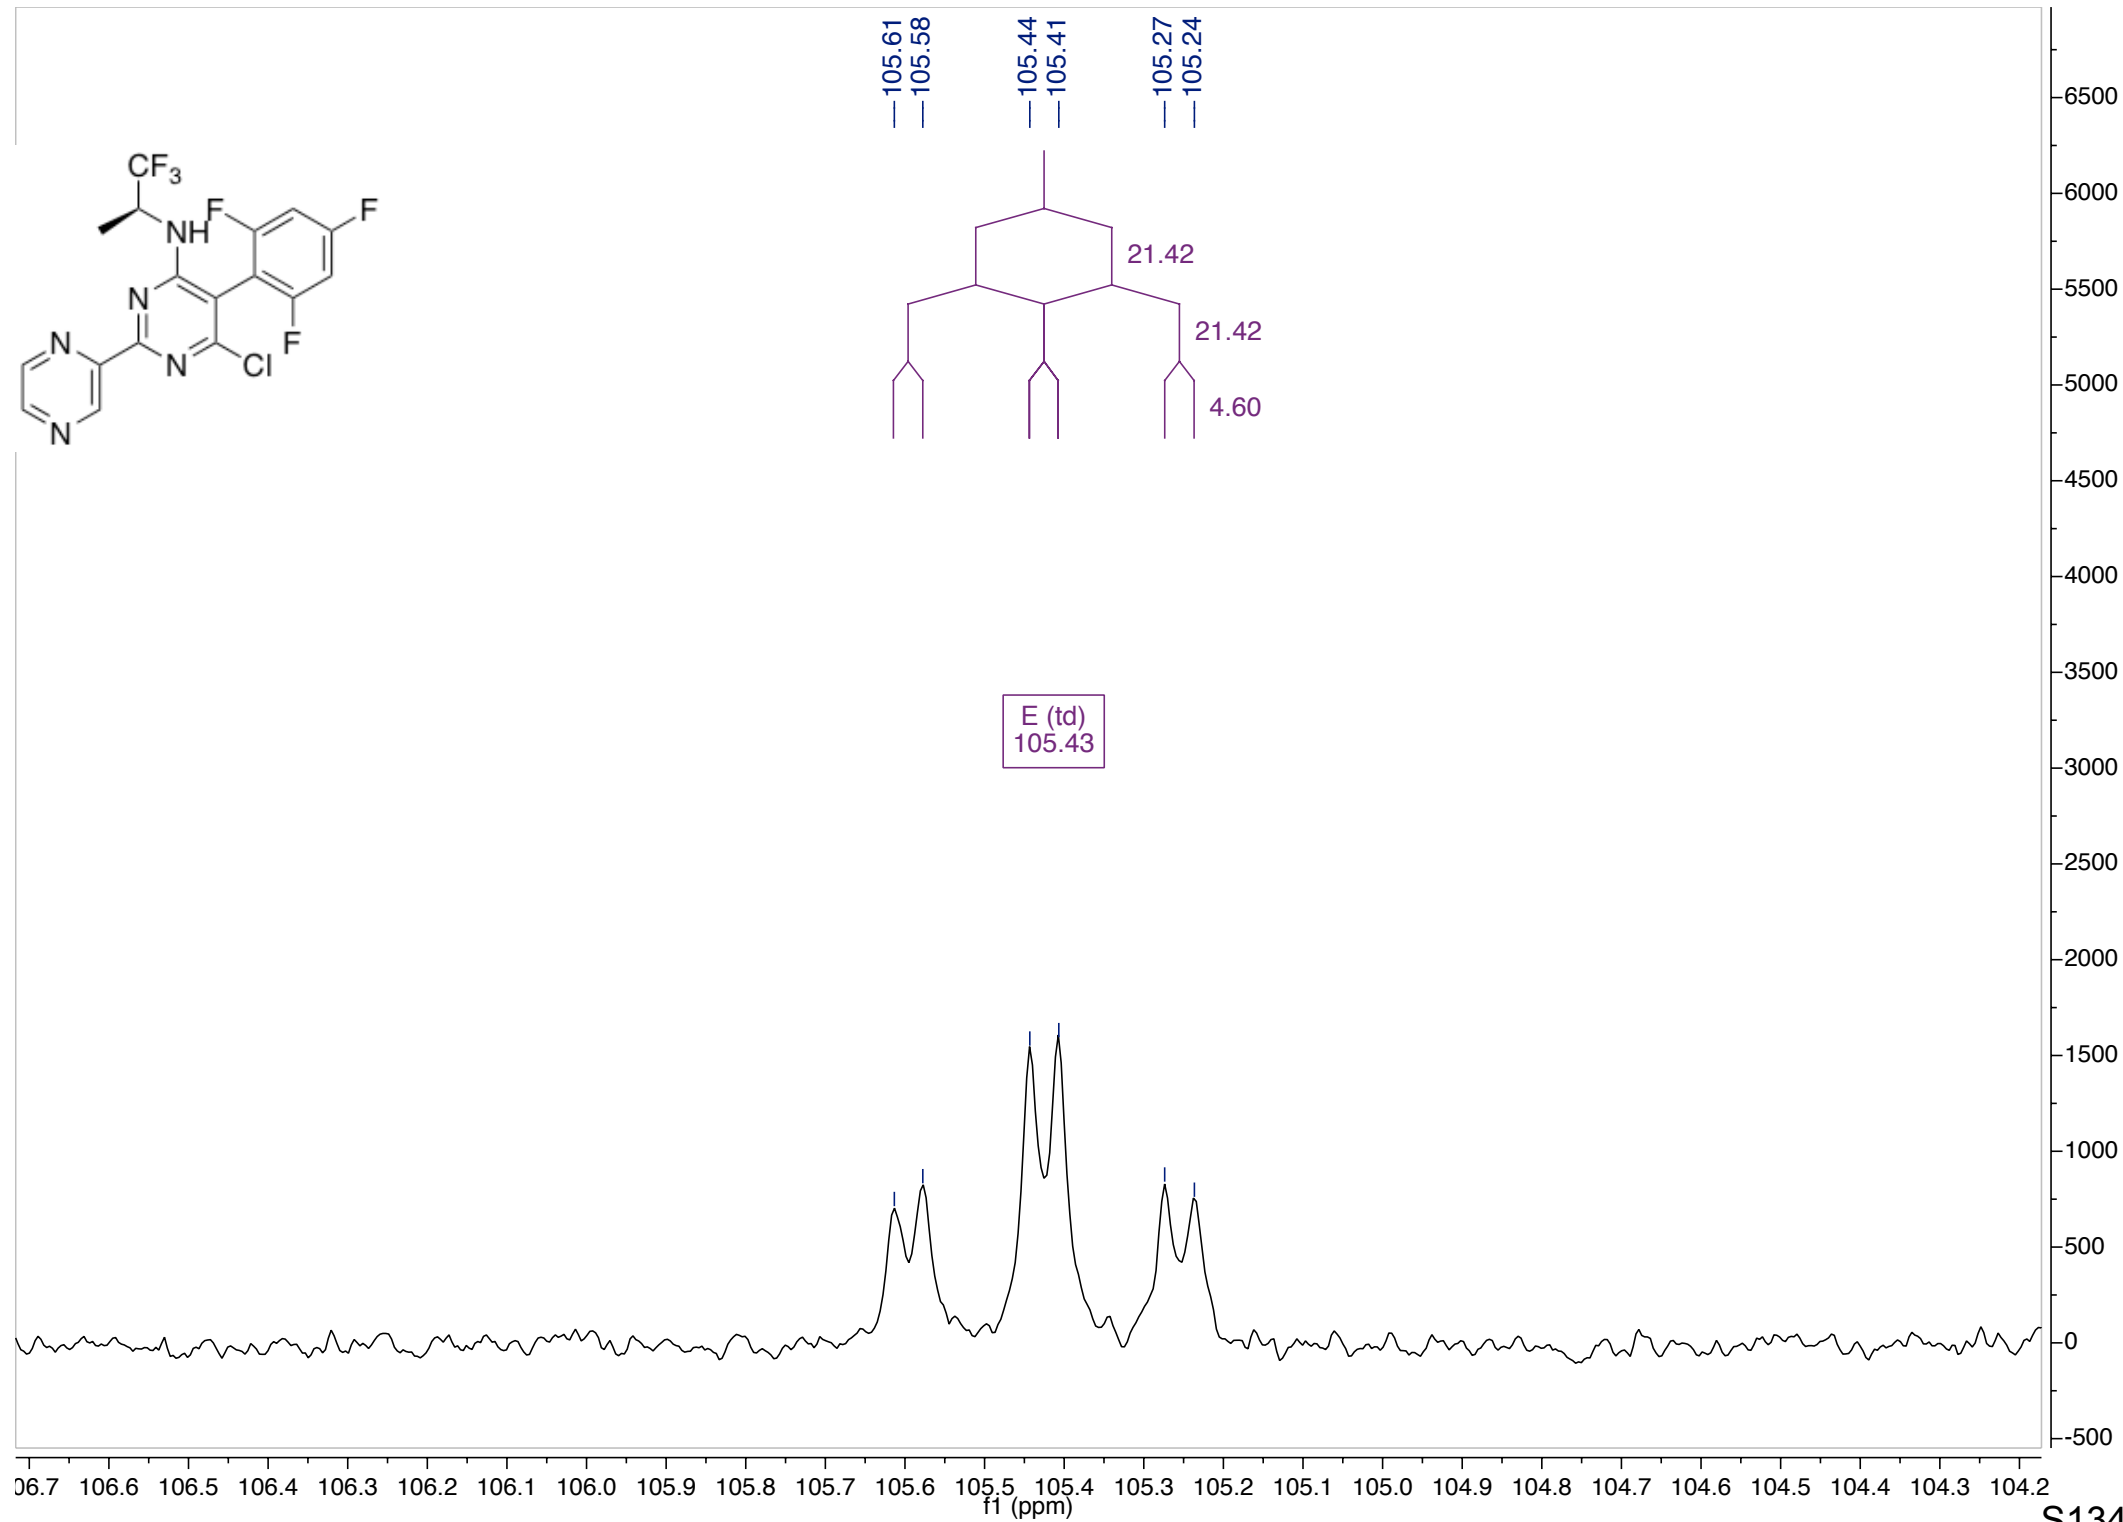

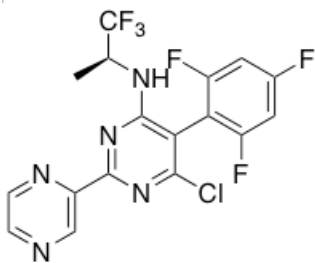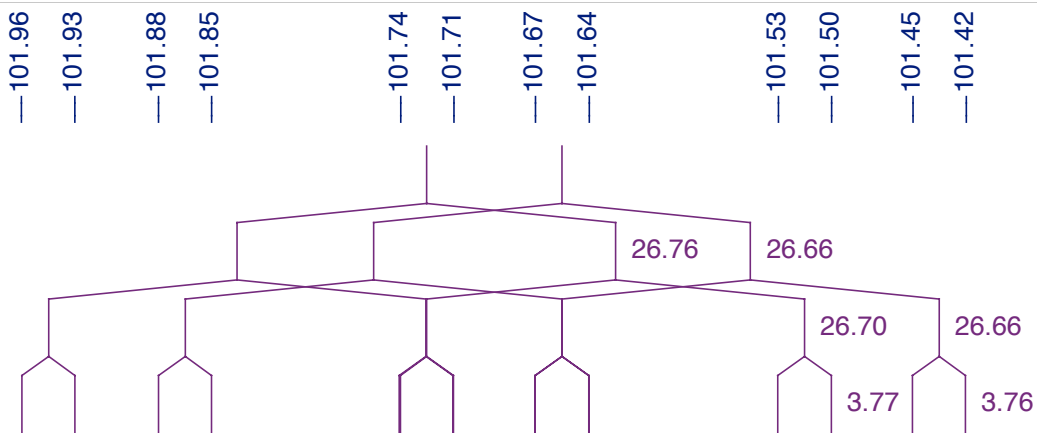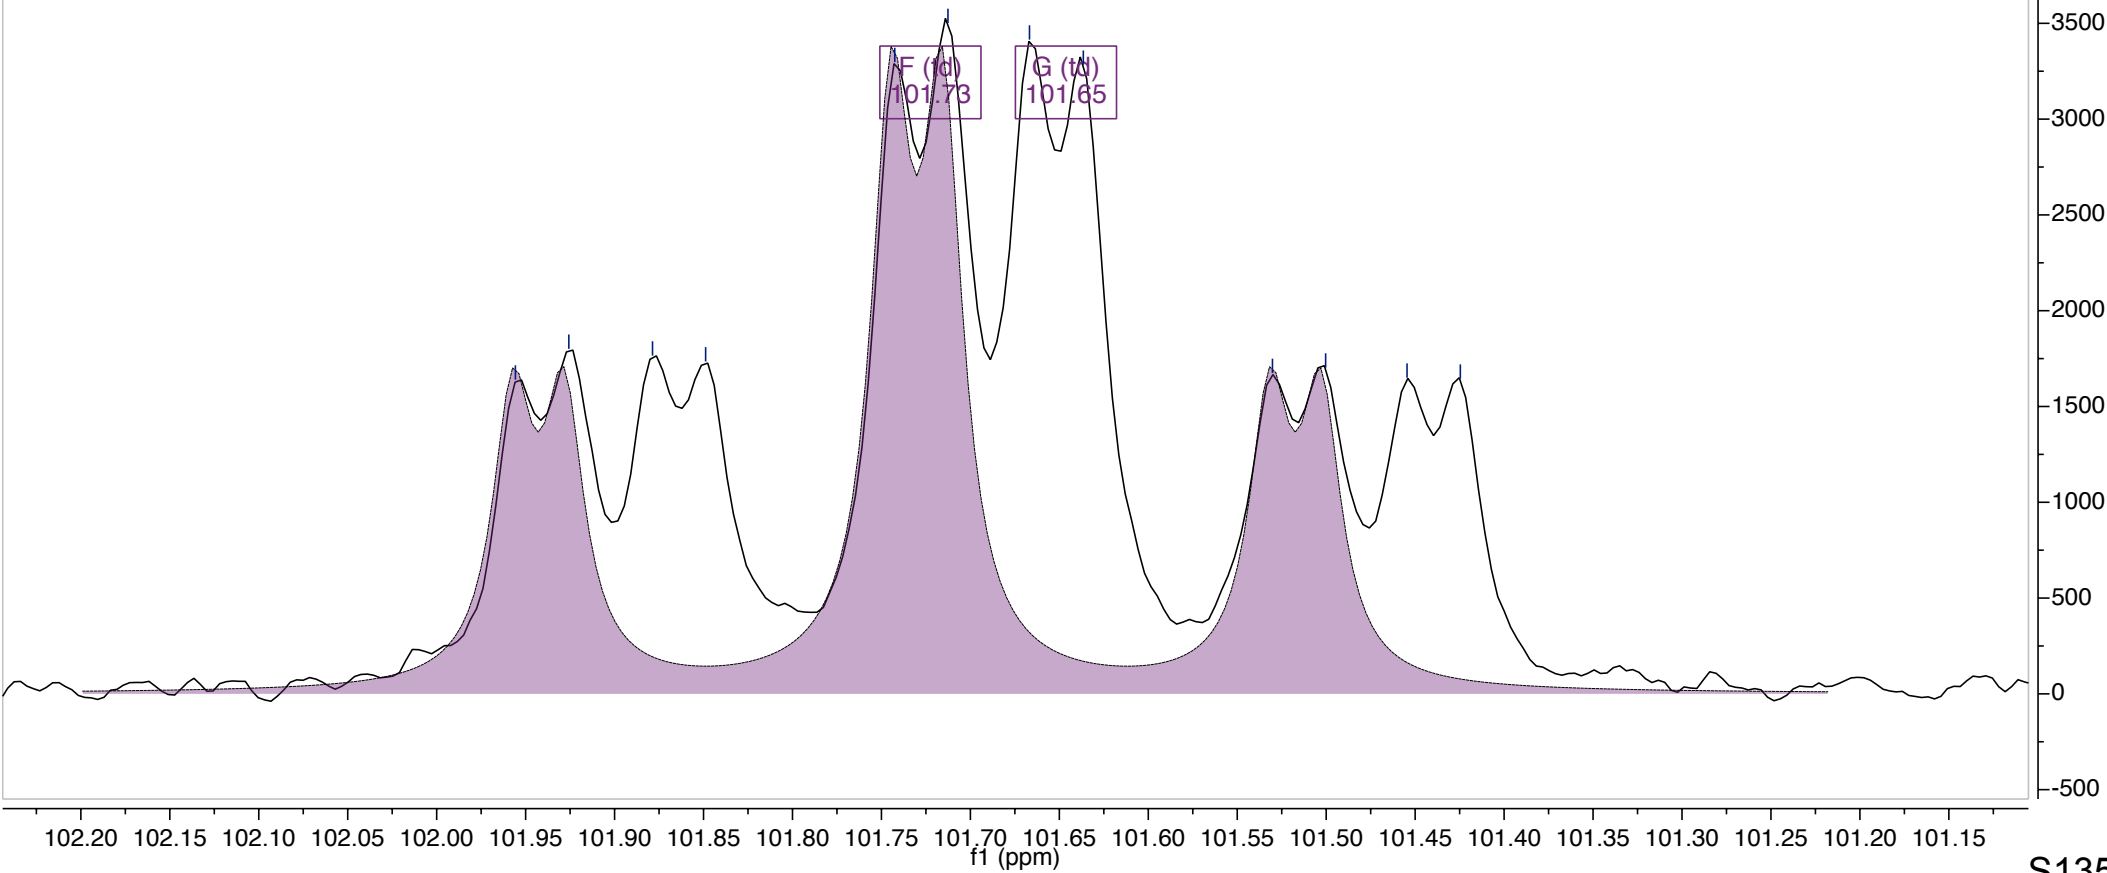

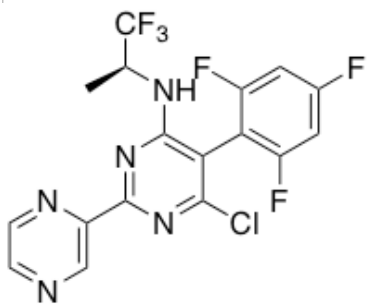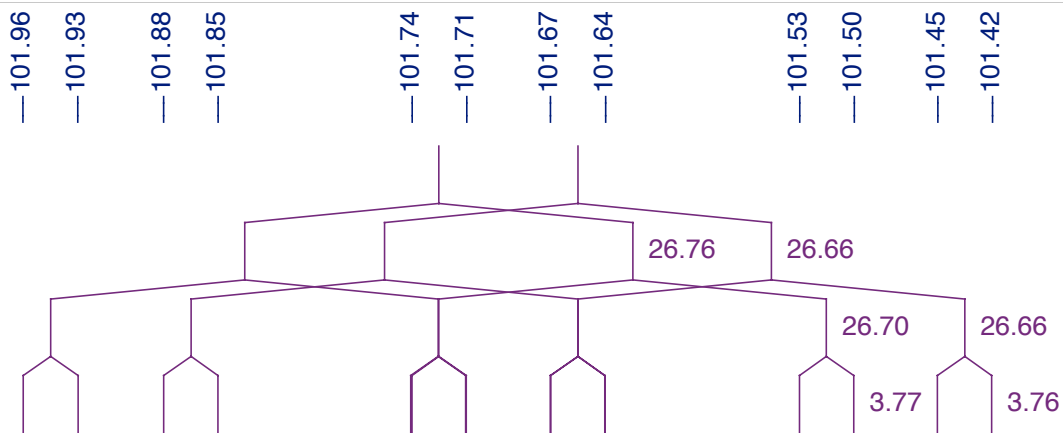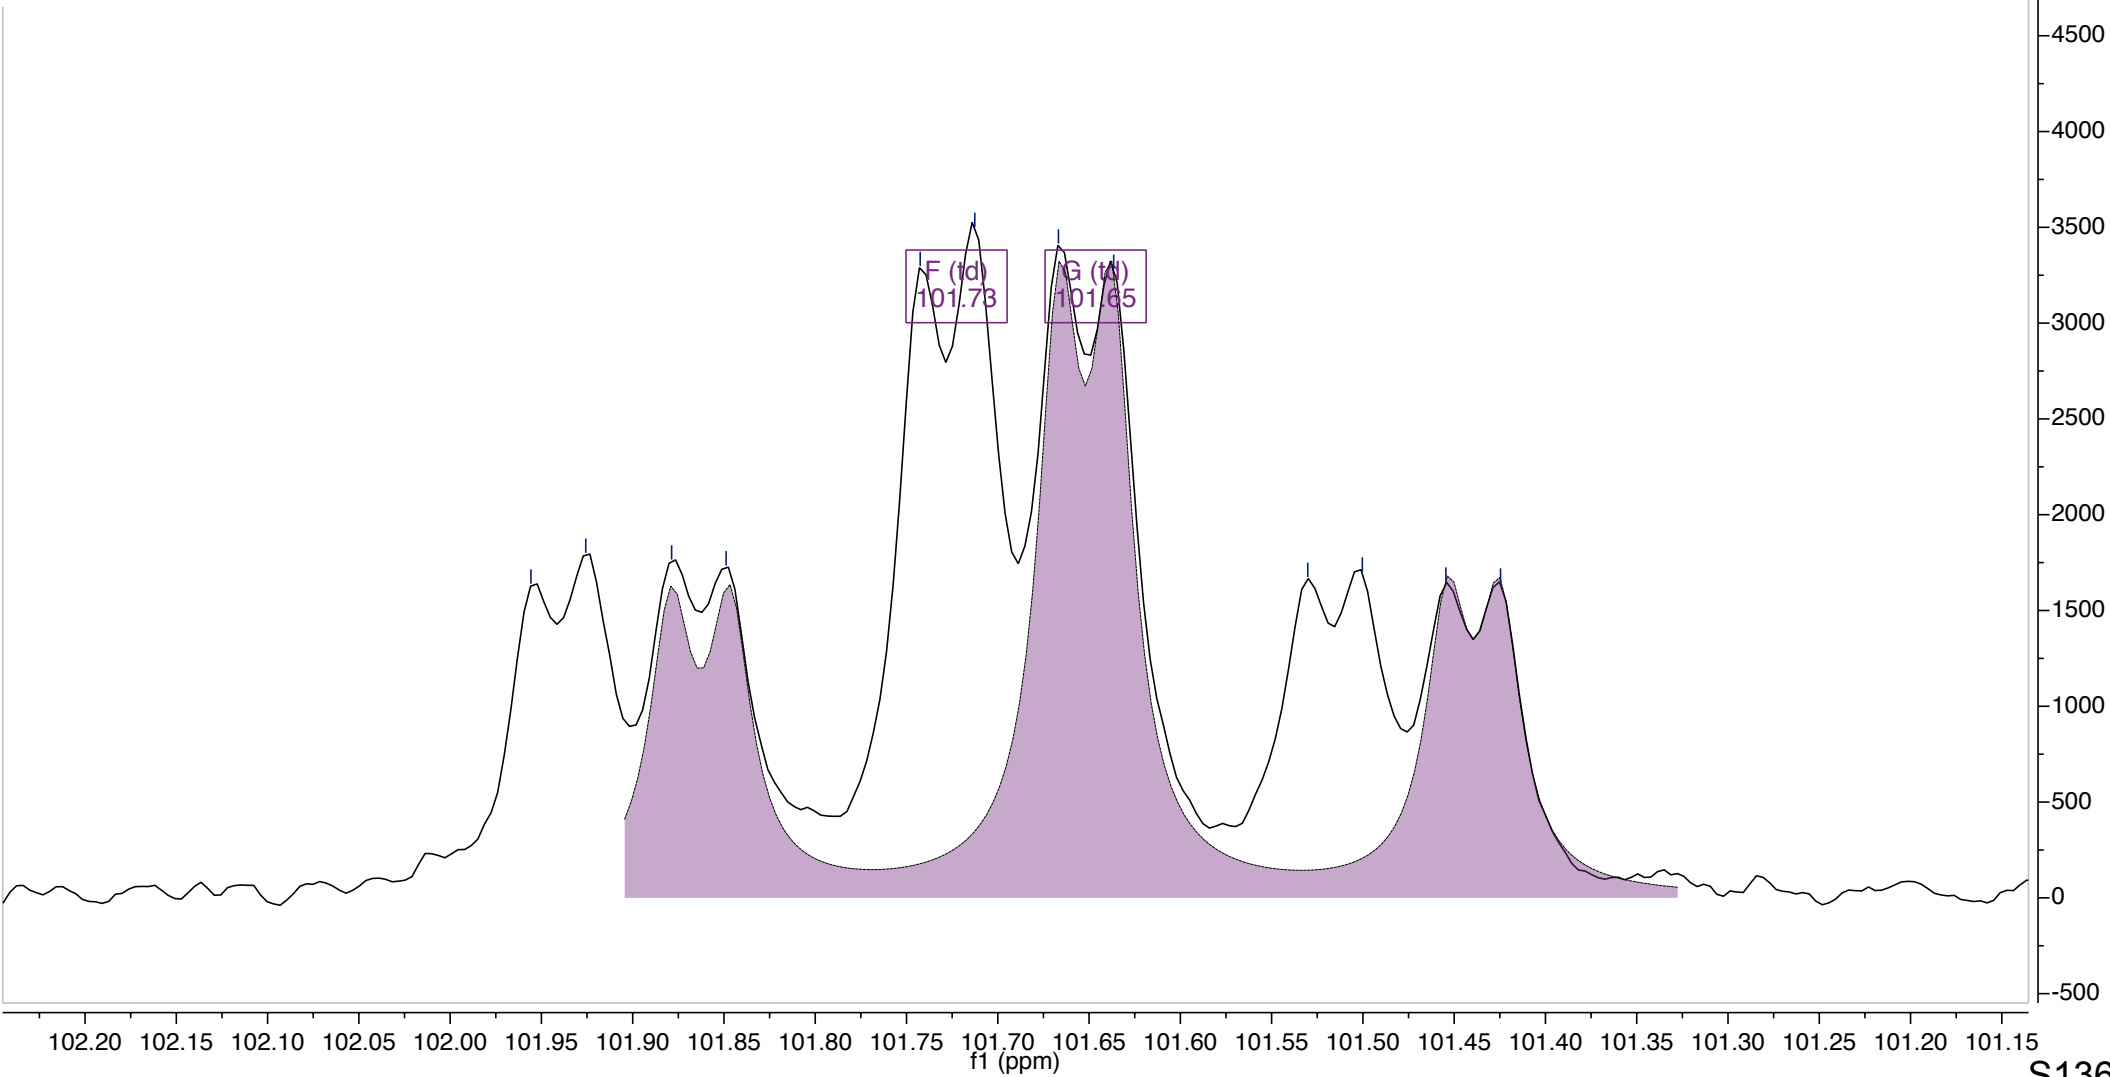



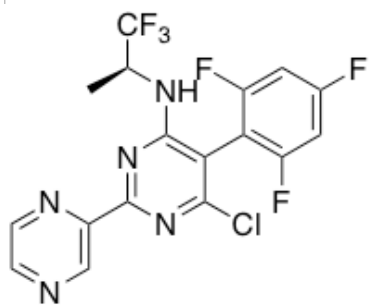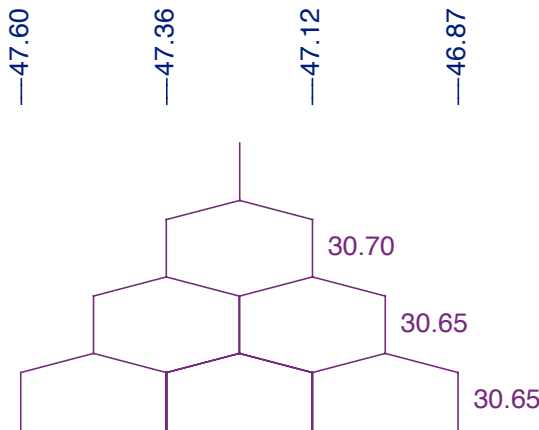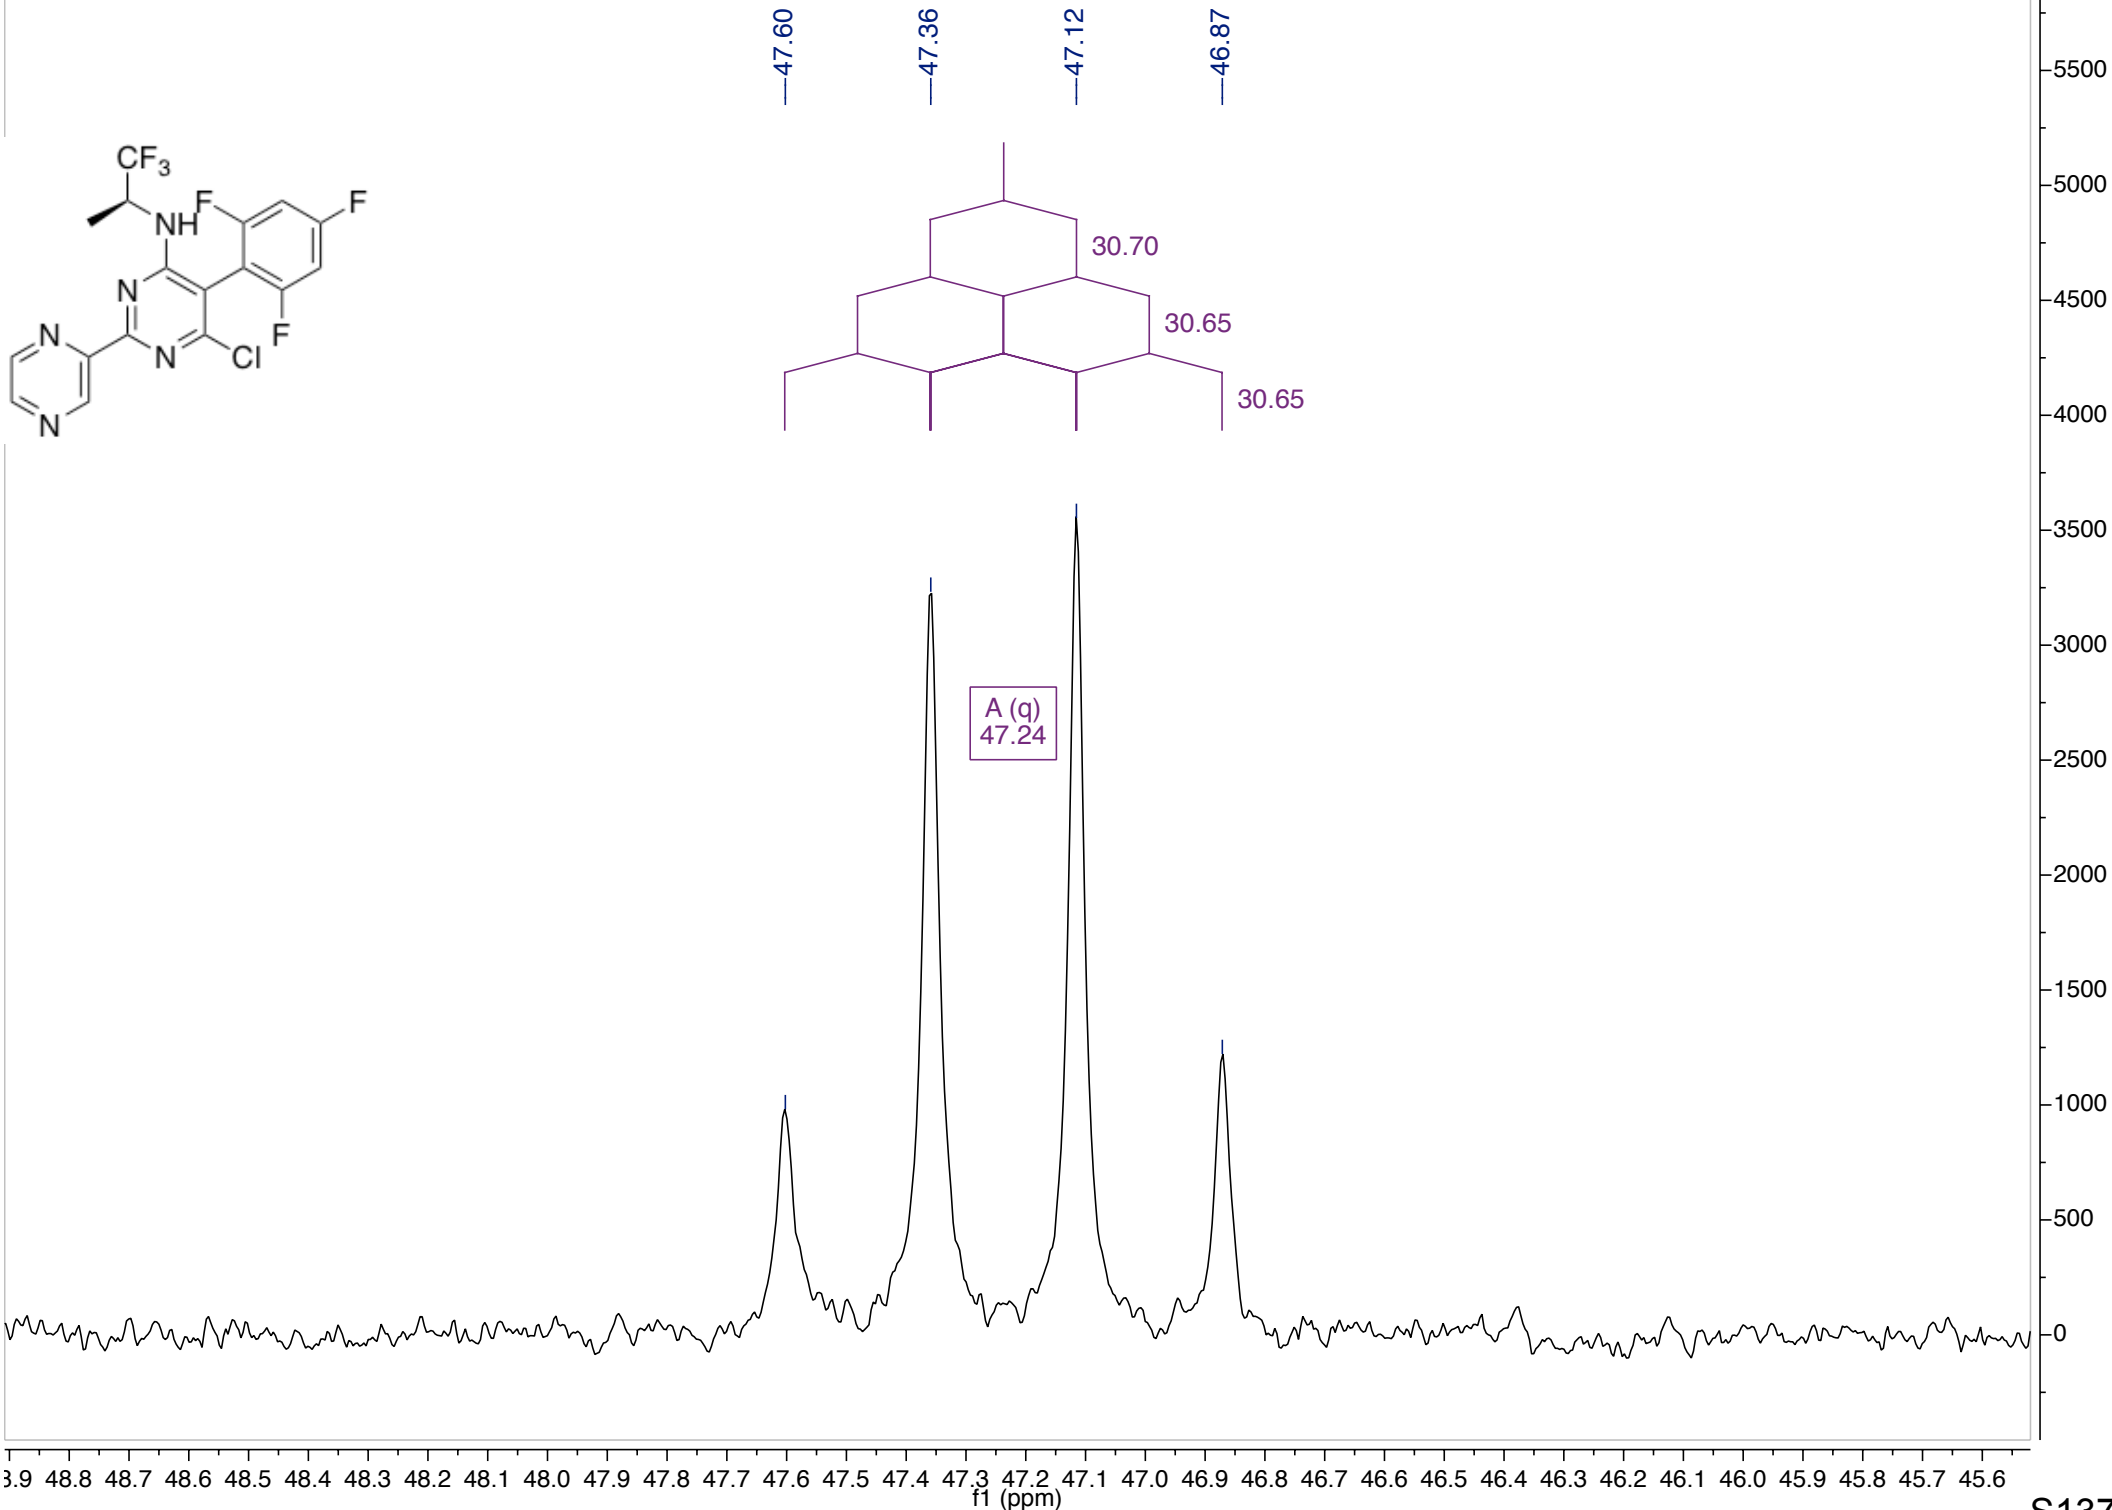

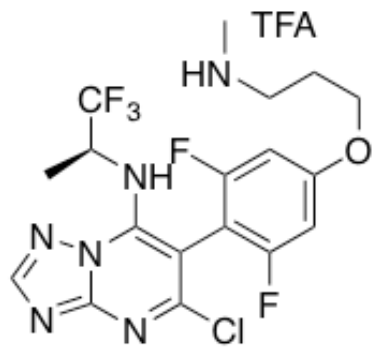

164.67  
164.60  
164.02  
163.94  
163.93  
163.81  
163.70  
162.96  
162.70  
162.68  
162.63  
162.06  
161.99  
159.51  
156.07  
155.91  
149.28

130.04  
127.80  
125.56  
123.32  
119.35  
117.03  
102.97  
102.80  
102.63  
100.77  
100.75  
100.56  
100.54  
100.41  
100.38  
100.20  
100.18  
94.67

67.48

52.74  
52.49  
52.24  
51.98

34.01

27.05

14.06

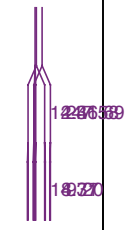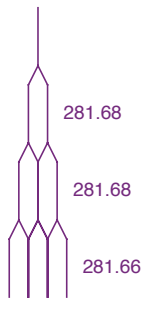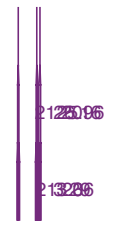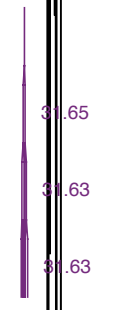

F (t)  
163.82  
A (dd)  
163.00  
G (dd)  
163.63

H (q)  
126.68

C (dd)  
100.66  
B (t)  
102.80  
D (dd)  
100.29

E (d)  
52.36

210 200 190 180 170 160 150 140 130 120 110 100 90 80 70 60 50 40 30 20 10 0 -10  
f1 (ppm)

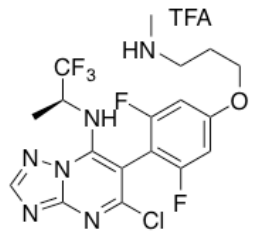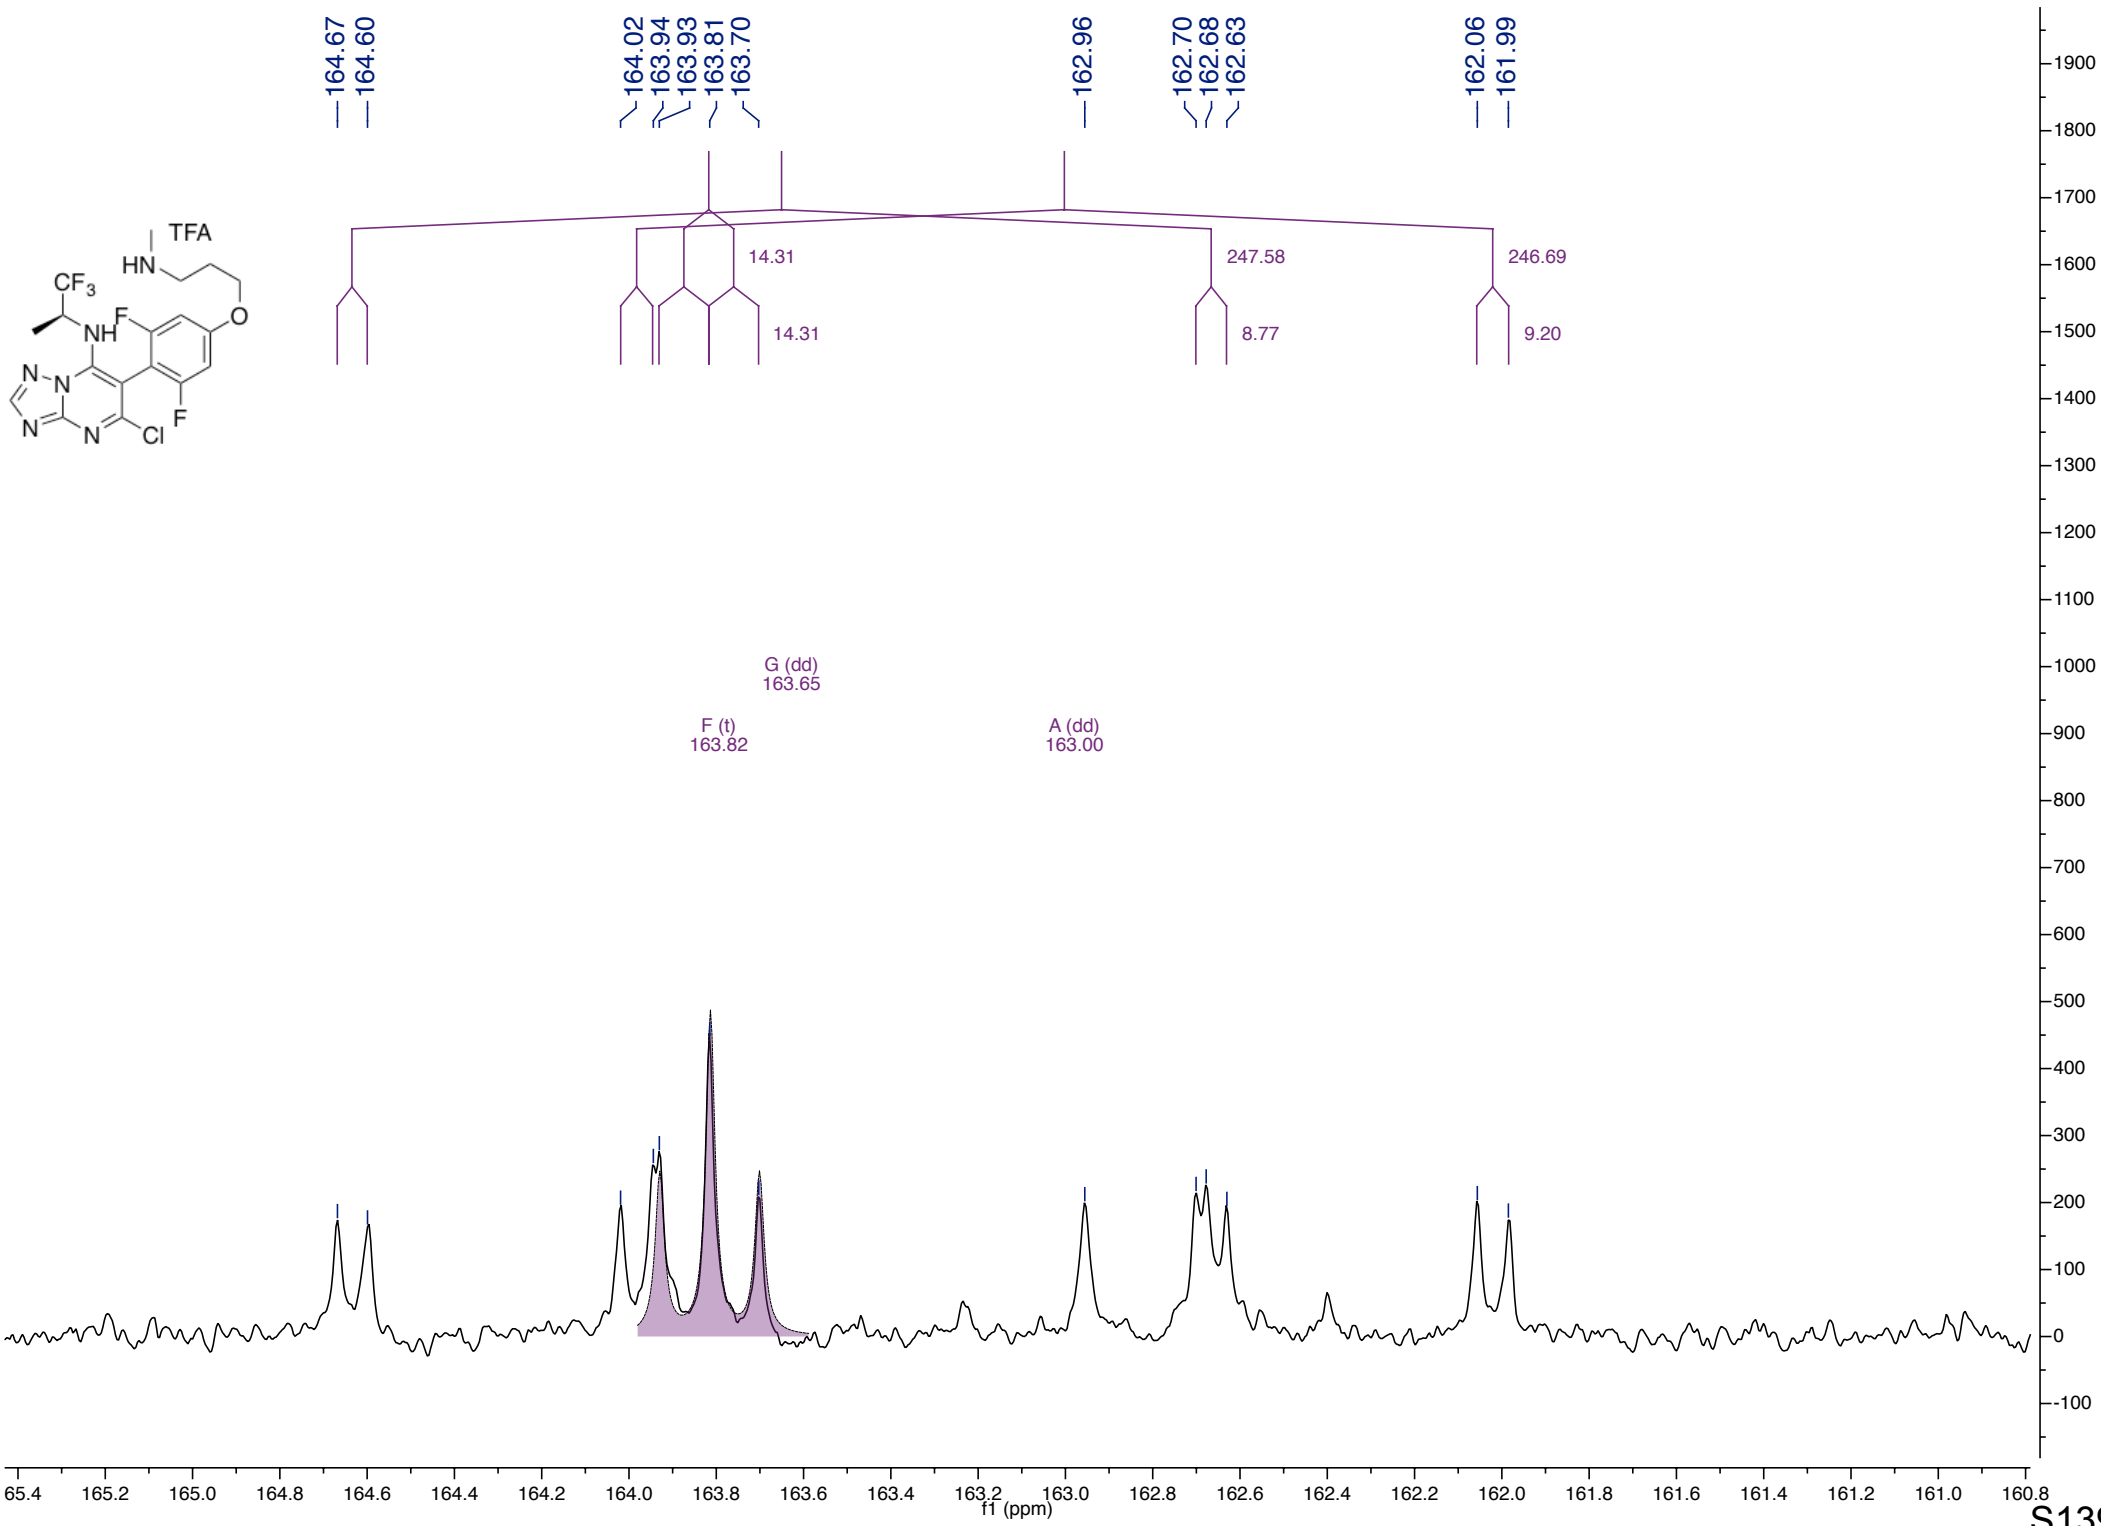



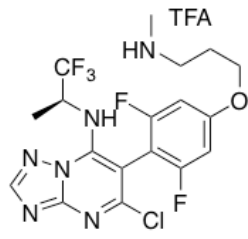

164.67  
164.60  
164.02  
163.94  
163.93  
163.81  
163.70  
162.96  
162.70  
162.68  
162.63  
162.06  
161.99

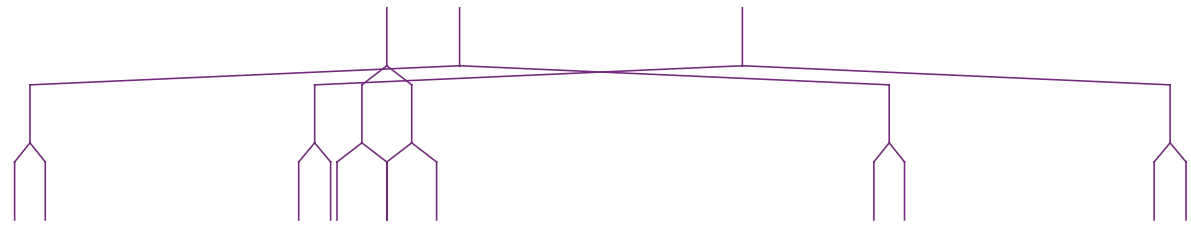

F (t)  
163.82  
G (dd)  
163.65  
A (dd)  
163.00

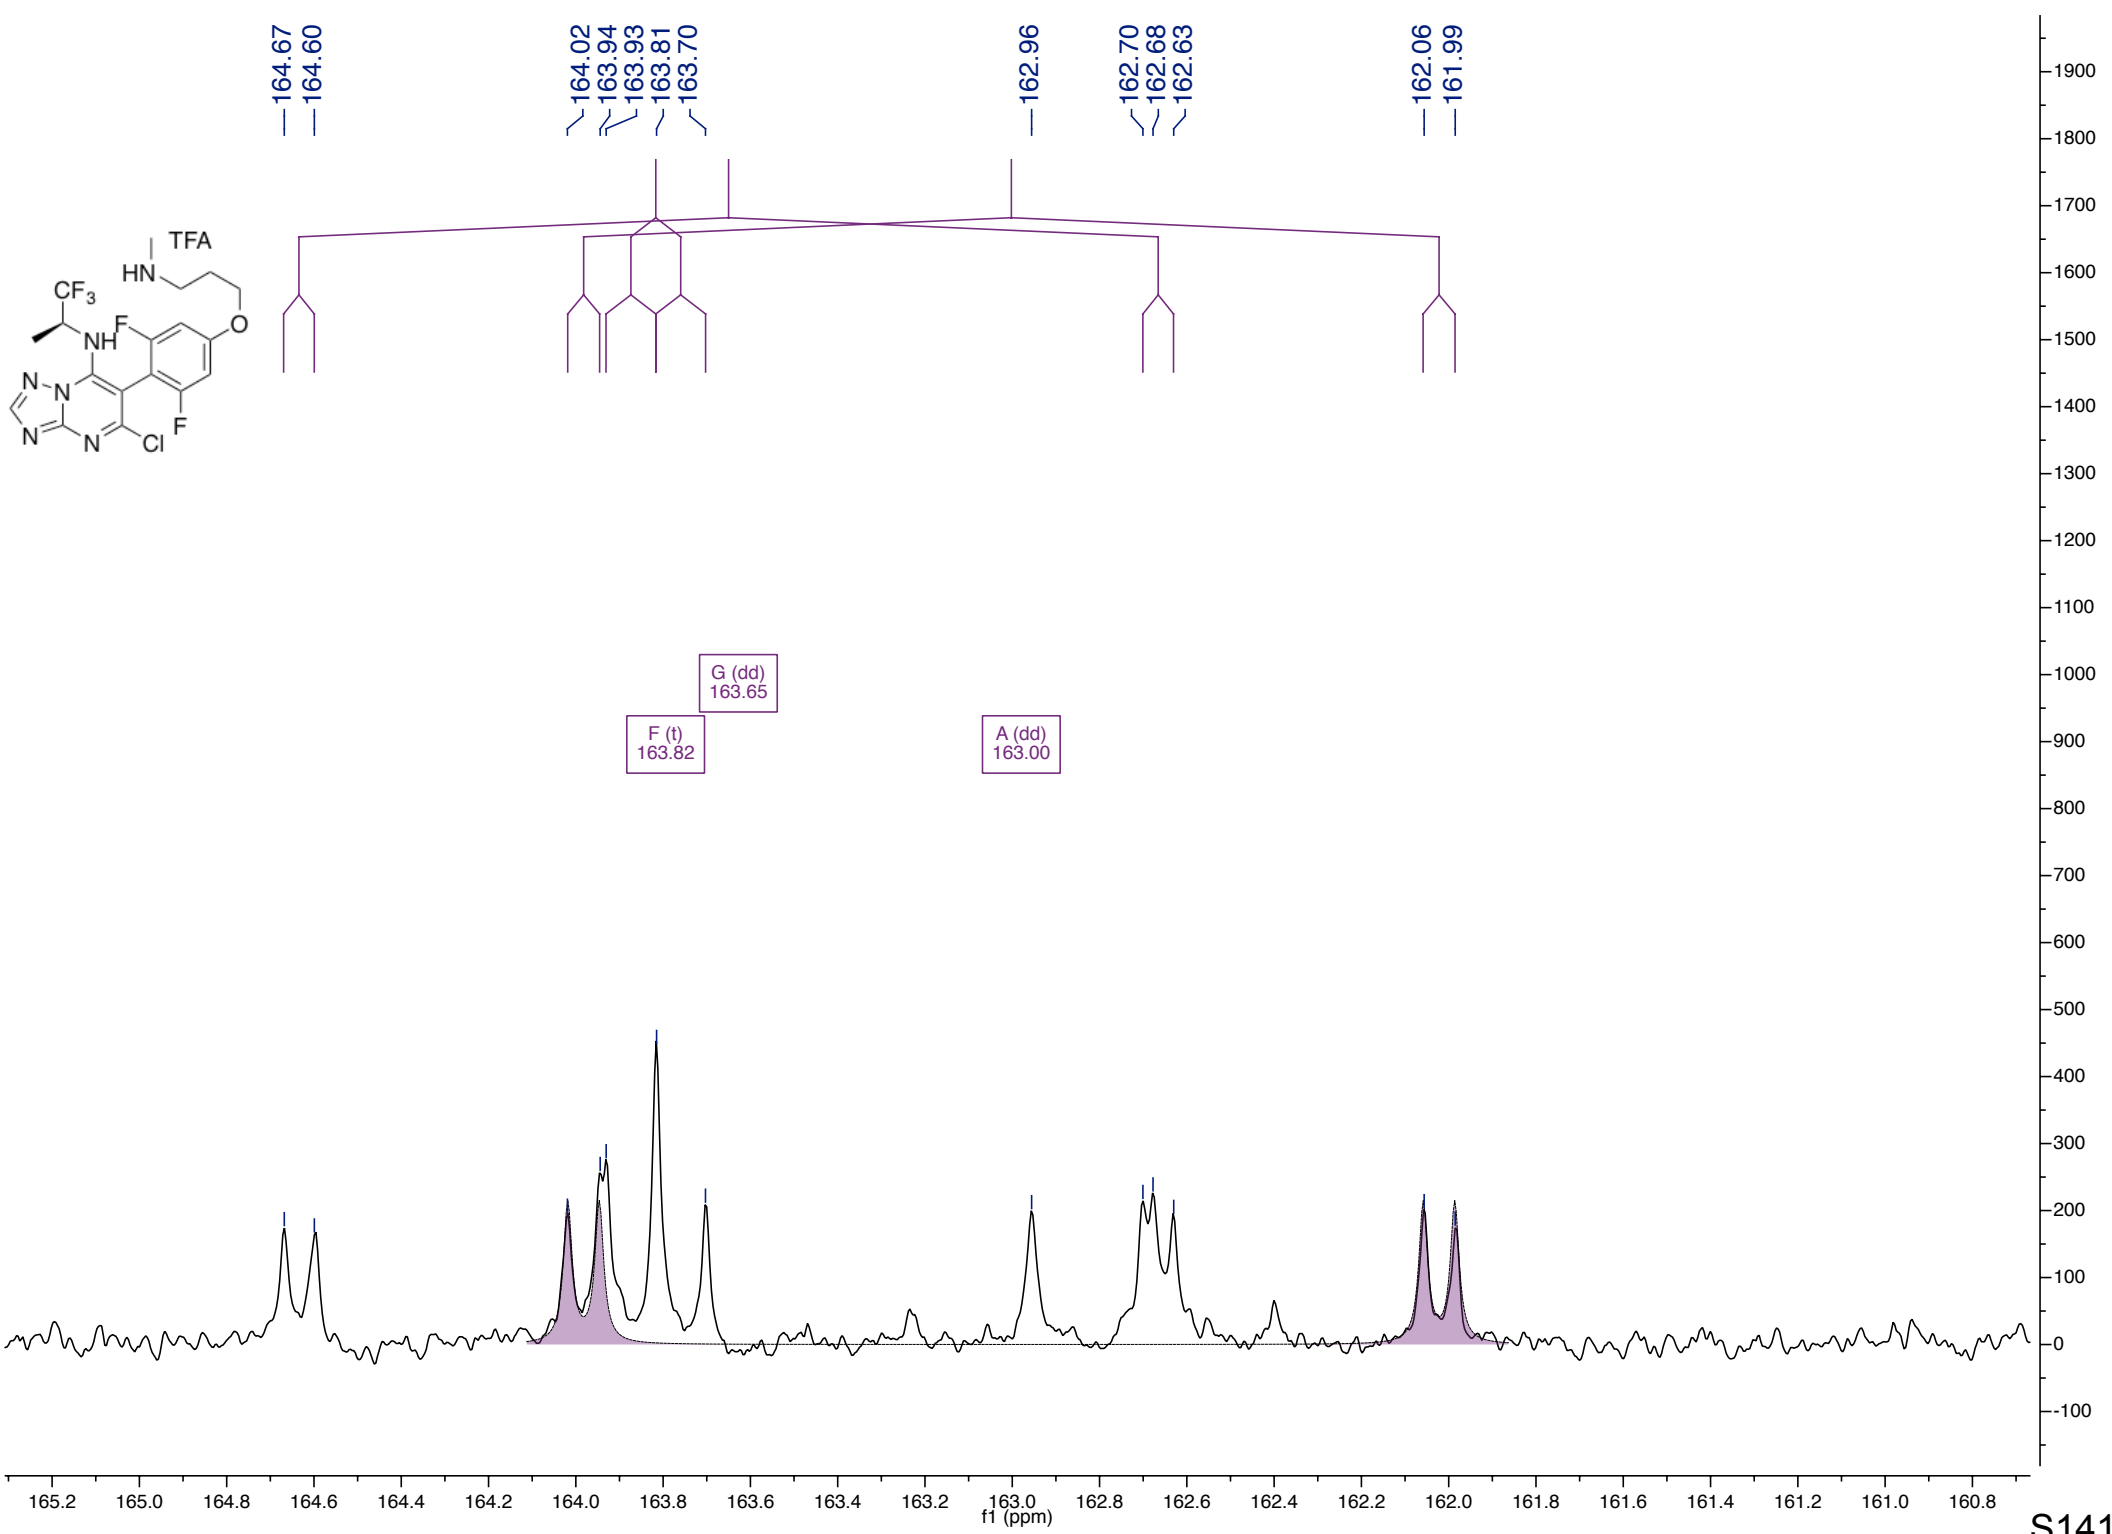

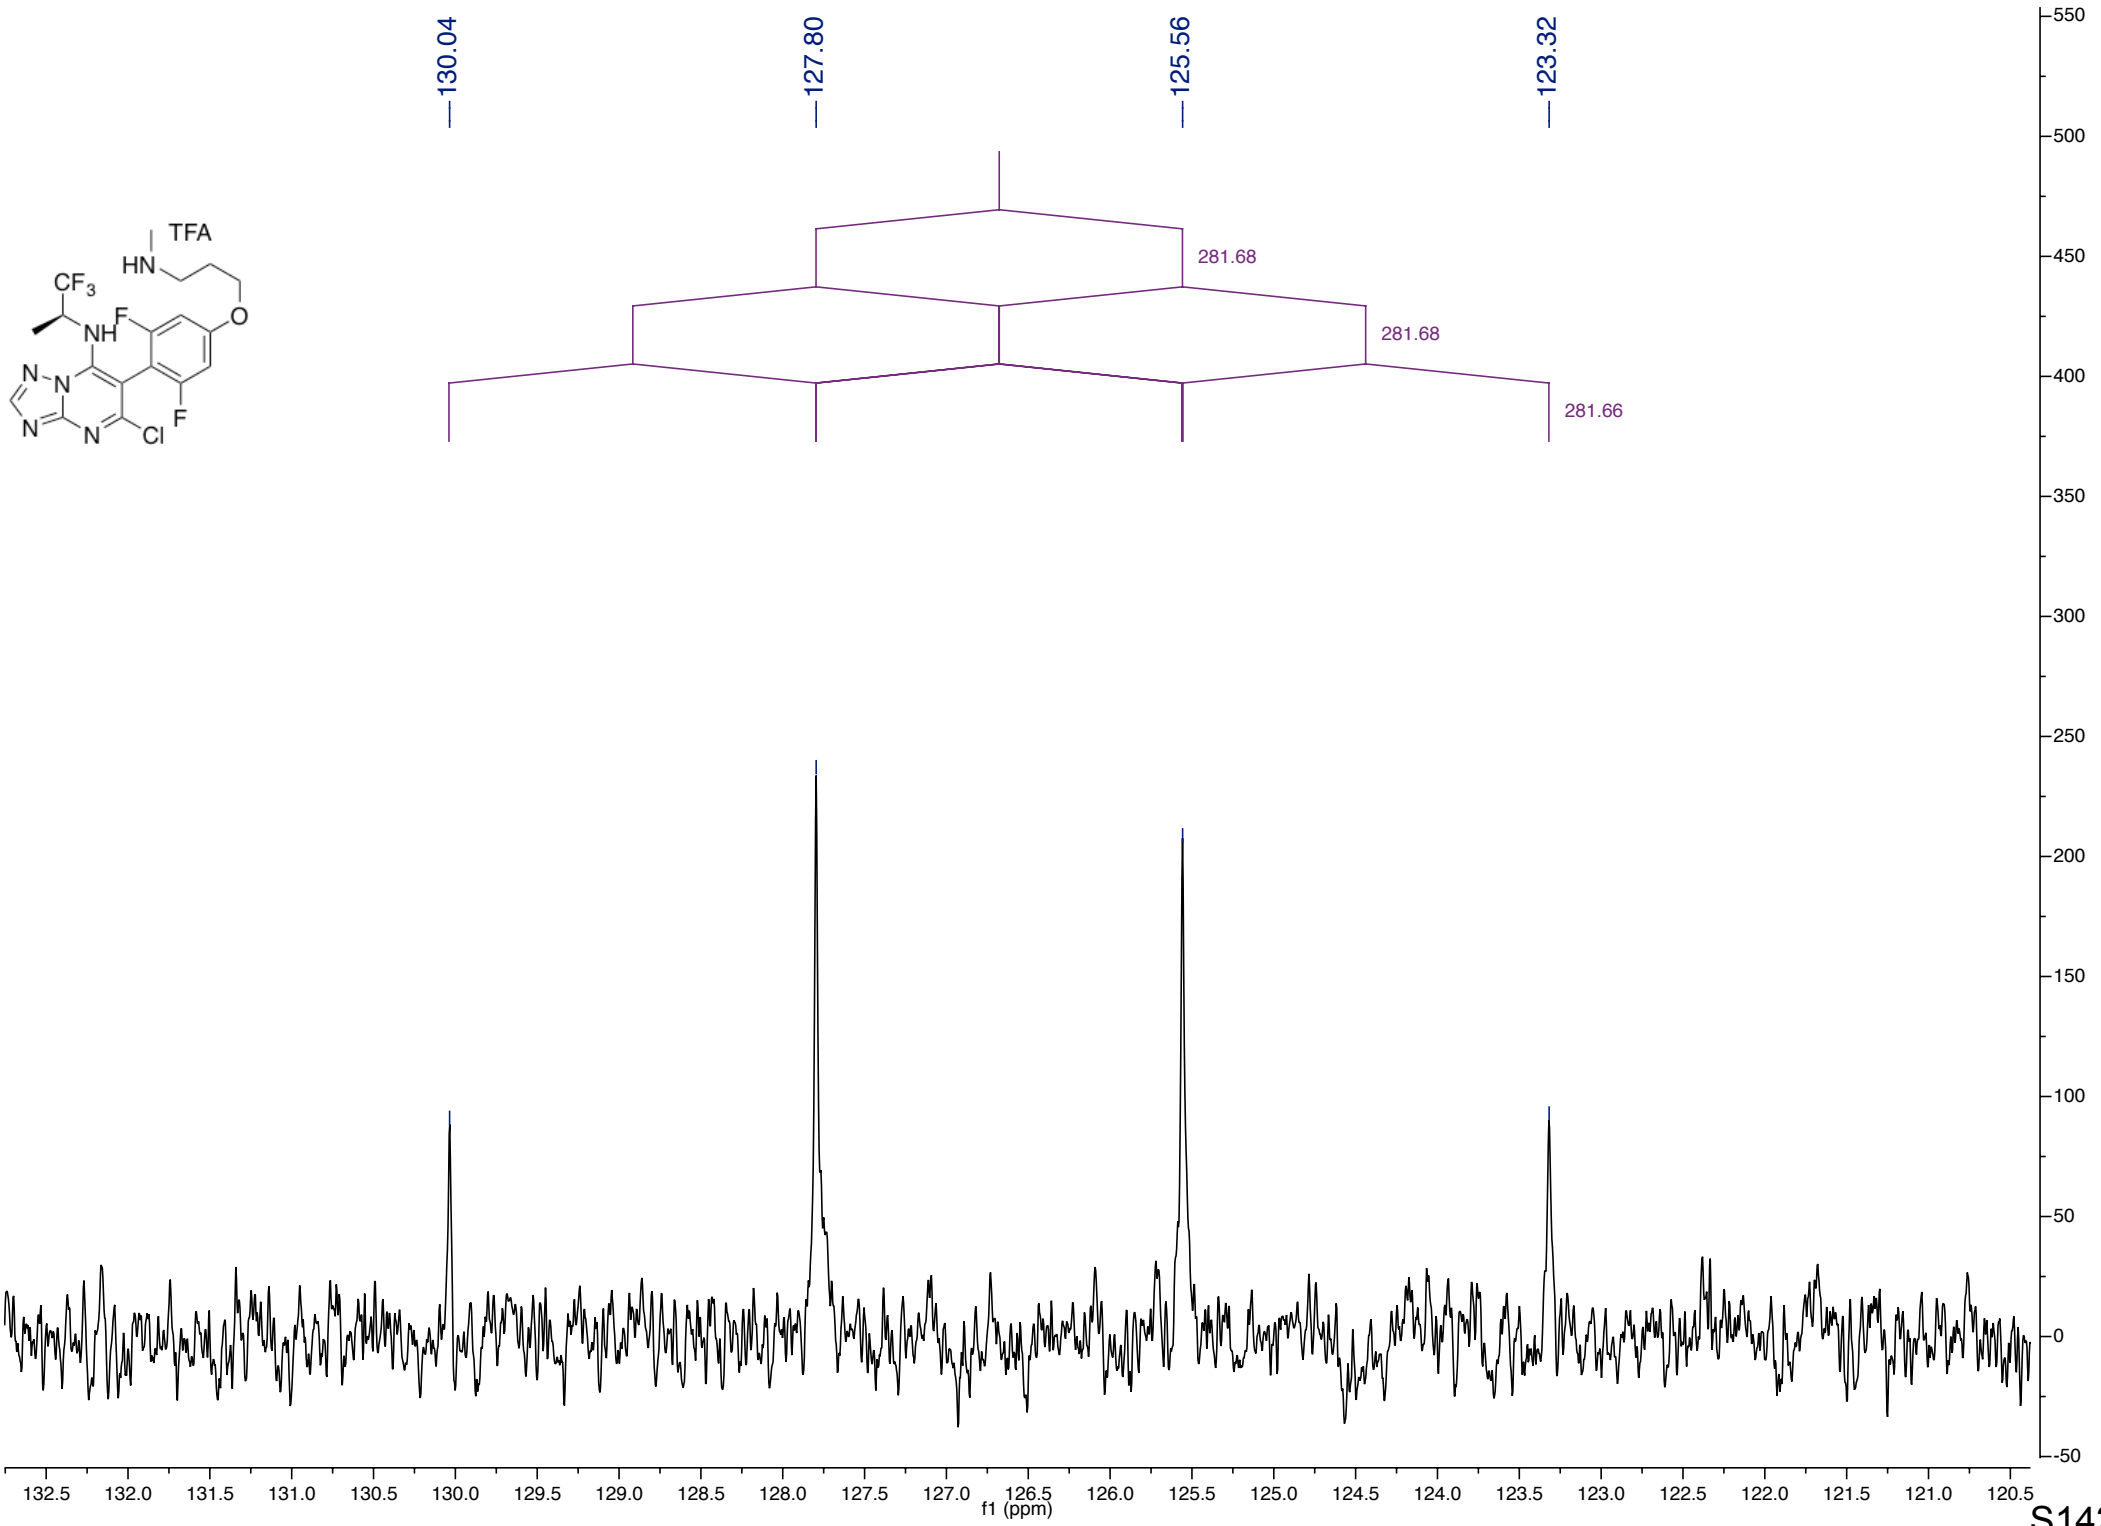

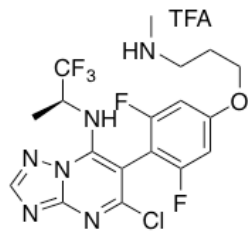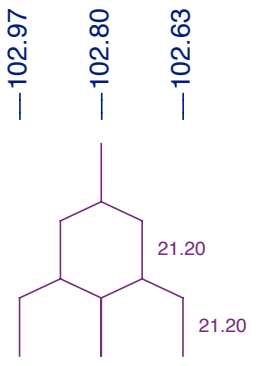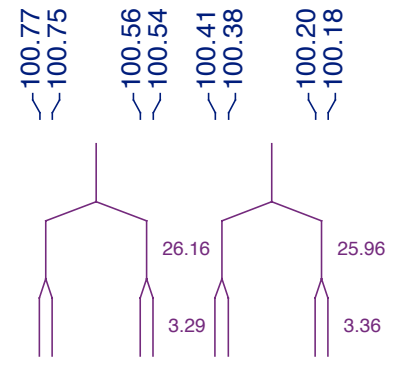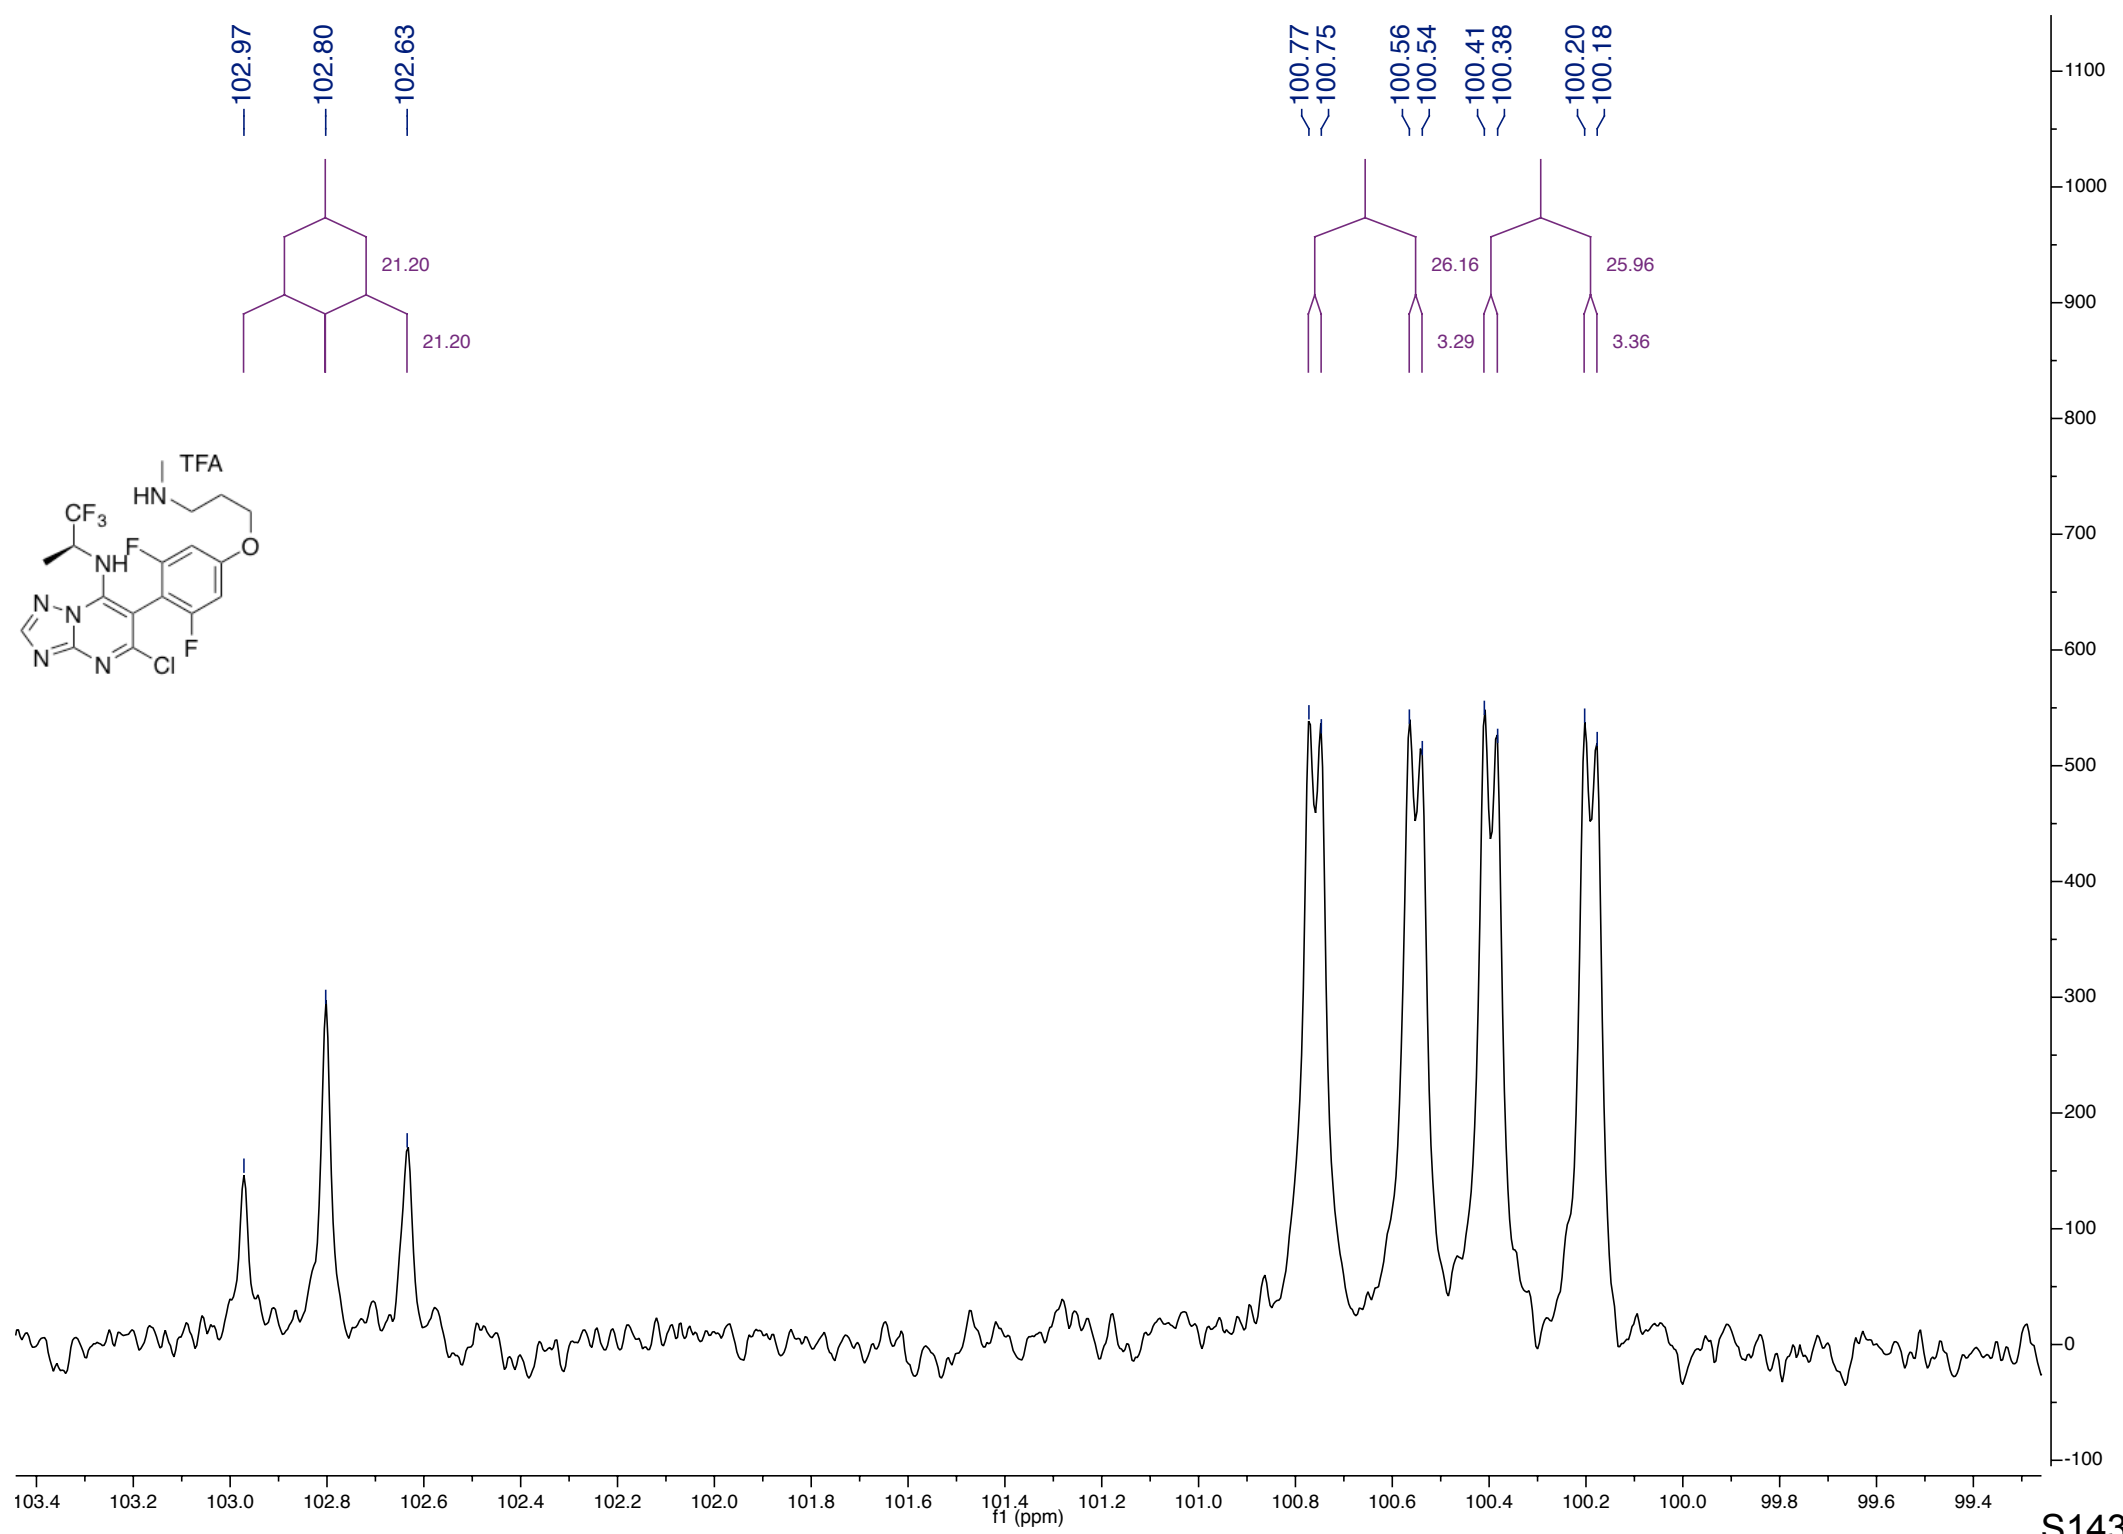

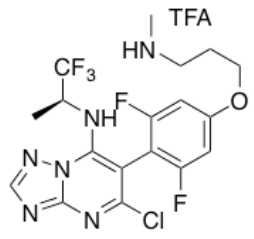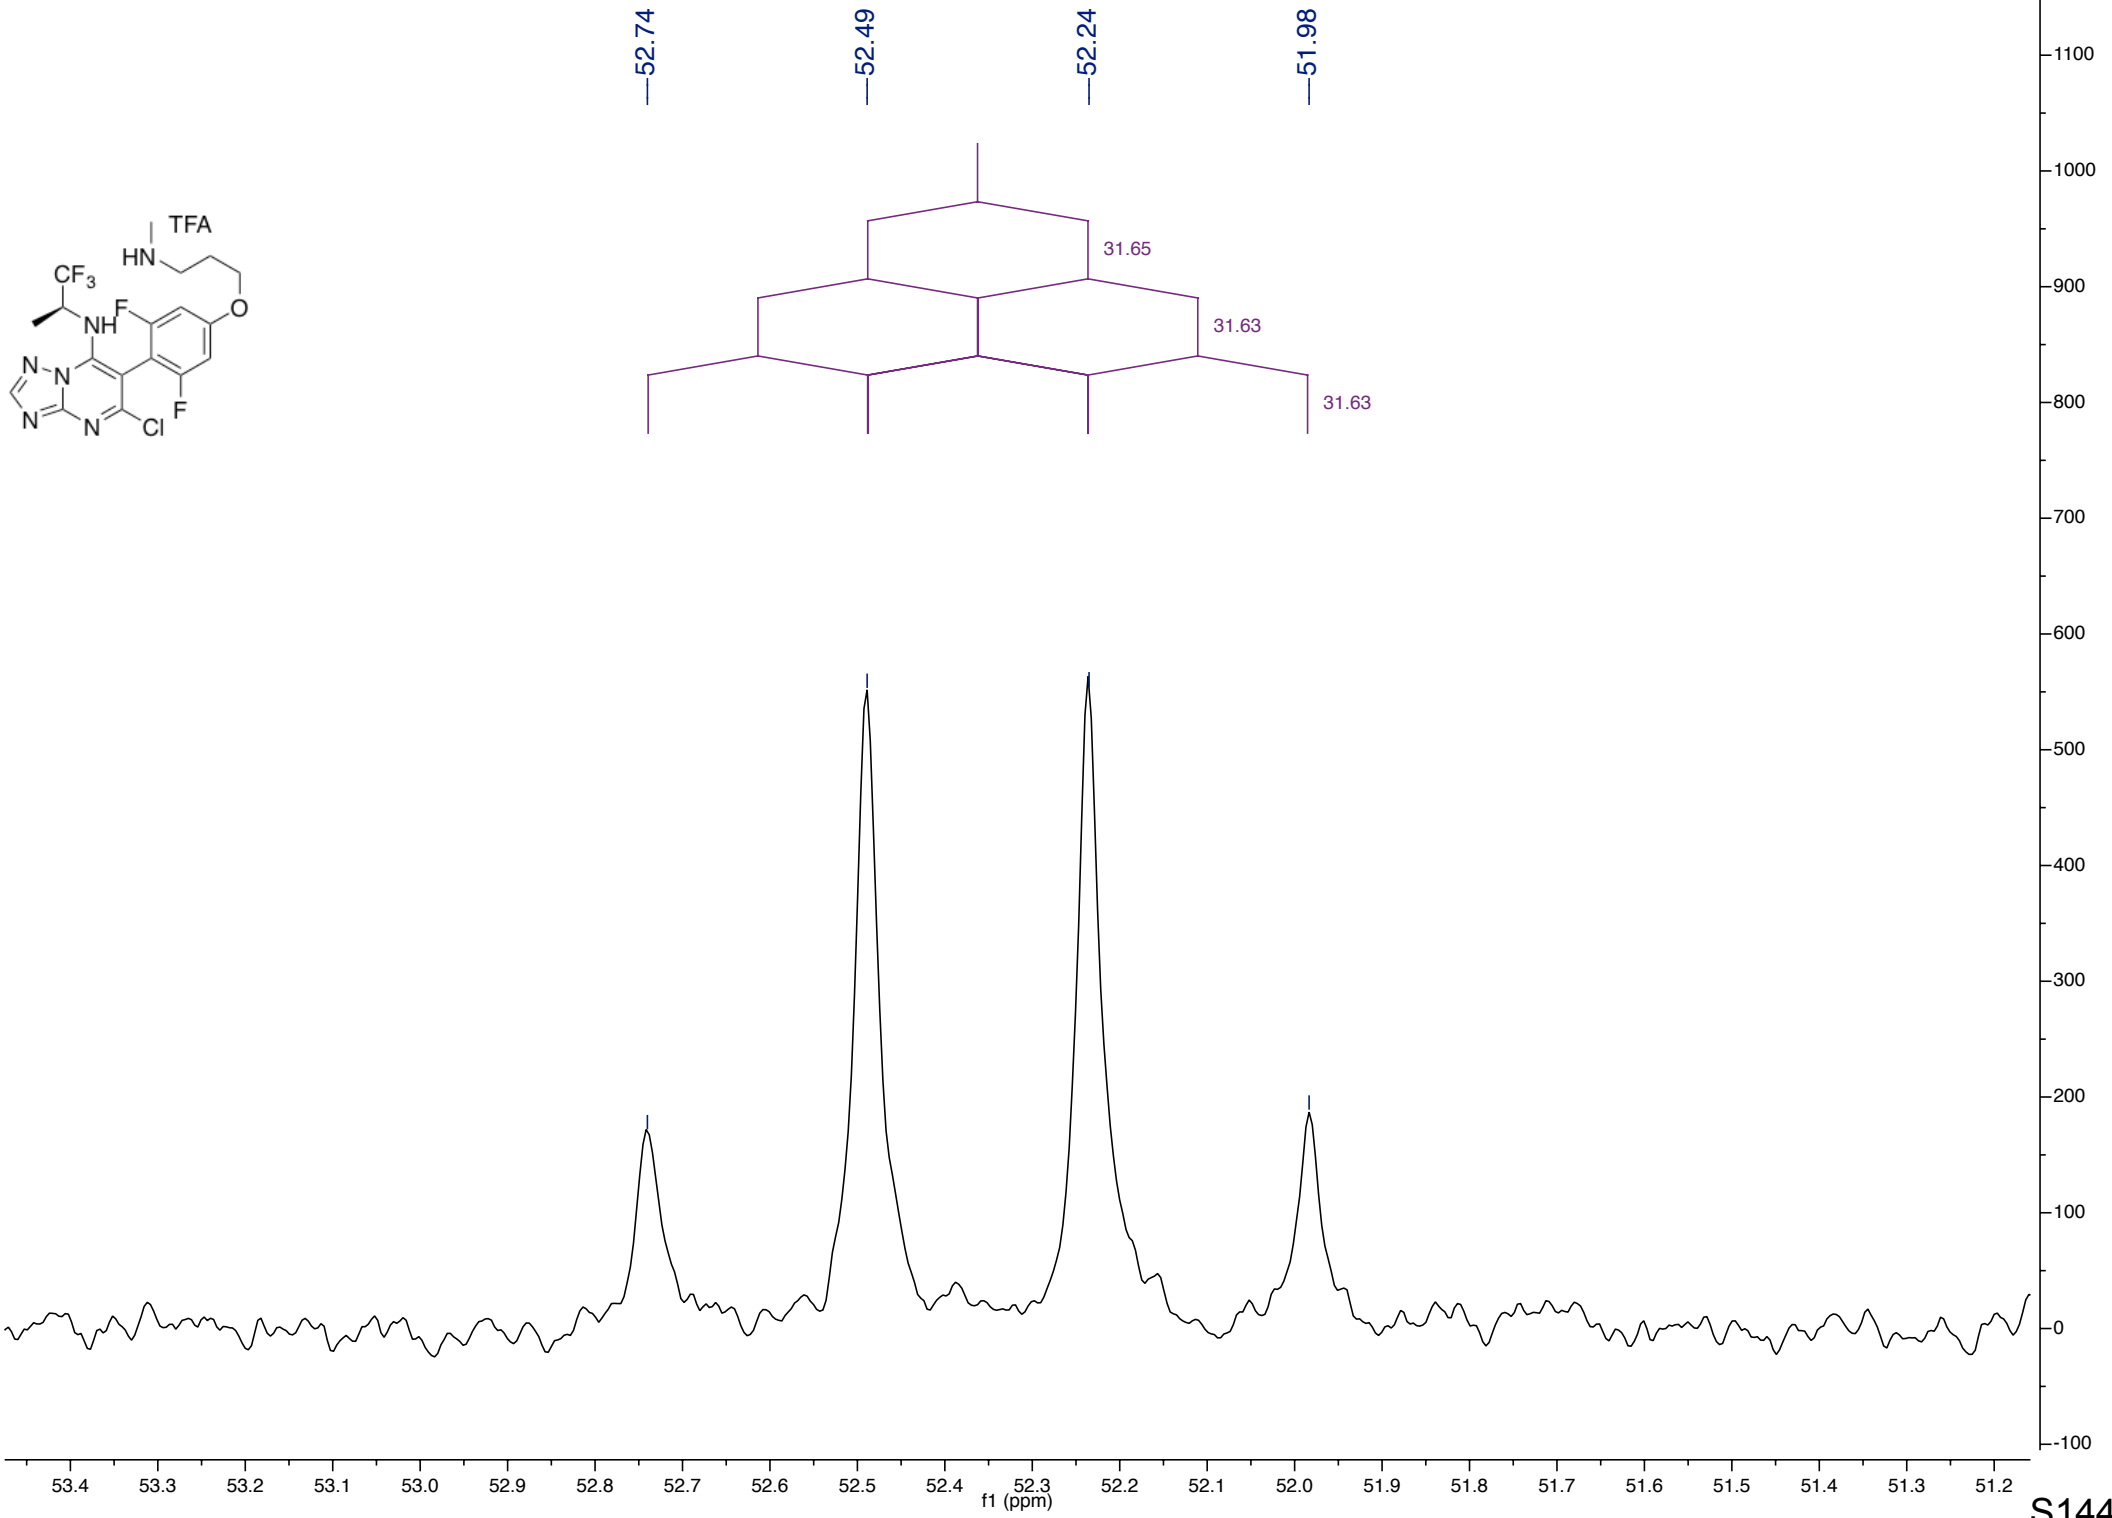



### X-ray Structure Determination of Compound 23 (CCDC 992821)

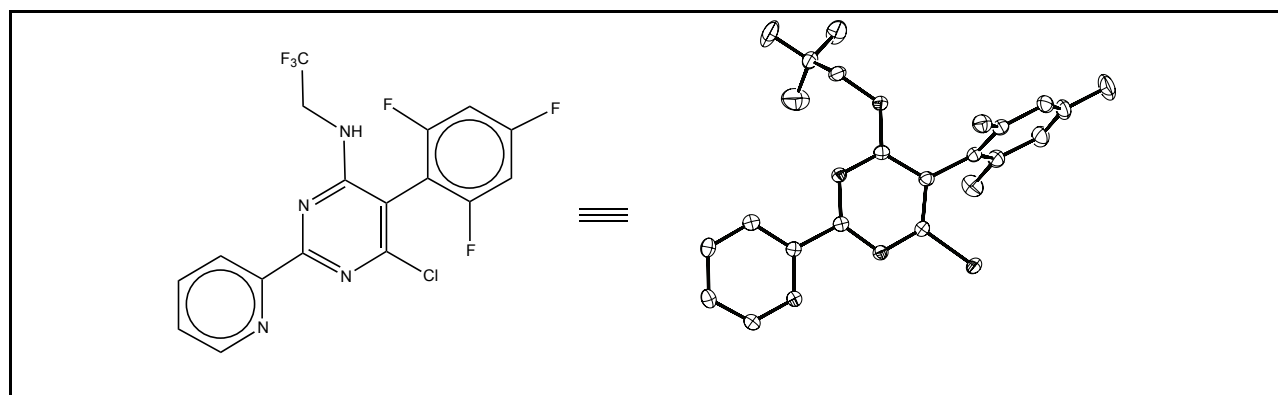

Compound 1342,  $C_{51}H_{27}N_{12}F_{18}Cl_3$ , crystallizes in the triclinic space group  $P\bar{1}$  with  $a=9.6735(9)\text{\AA}$ ,  $b=17.3727(16)\text{\AA}$ ,  $c=18.984(3)\text{\AA}$ ,  $\alpha=116.369(6)^\circ$ ,  $\beta=94.290(6)^\circ$ ,  $\gamma=102.067(4)^\circ$ ,  $V=2743.6(6)\text{\AA}^3$ ,  $Z=2$ , and  $d_{\text{calc}}=1.521\text{ g/cm}^3$ . X-ray intensity data were collected on a Bruker APEXII CCD area detector employing graphite-monochromated Mo-K $\alpha$  radiation ( $\lambda=0.71073\text{ \AA}$ ) at a temperature of 143(1)K. Preliminary indexing was performed from a series of thirty-six  $0.5^\circ$  rotation frames with exposures of 10 seconds. A total of 2378 frames were collected with a crystal to detector distance of 37.646 mm, rotation widths of  $0.5^\circ$  and exposures of 5 seconds:

| scan type | $2\theta$ | $\omega$ | $\phi$ | $\chi$ | frames |
|-----------|-----------|----------|--------|--------|--------|
| $\phi$    | 19.50     | 59.55    | 348.71 | -26.26 | 739    |
| $\phi$    | -15.50    | 349.33   | 93.82  | -77.44 | 161    |
| $\phi$    | -23.00    | 334.21   | 38.95  | 73.66  | 739    |
| $\phi$    | -23.00    | 315.83   | 12.48  | 28.88  | 739    |

Rotation frames were integrated using SAINT<sup>i</sup>, producing a listing of unaveraged  $F^2$  and  $\sigma(F^2)$  values which were then passed to the SHELXTL<sup>ii</sup> program package for further processing and structure solution. A total of 54588 reflections were measured over the ranges  $2.16 \leq \theta \leq 25.46^\circ$ ,  $-11 \leq h \leq 11$ ,  $-20 \leq k \leq 20$ ,  $-22 \leq l \leq 22$  yielding 9973 unique reflections ( $R_{\text{int}} = 0.0221$ ). The intensity data were corrected for Lorentz and polarization effects and for absorption using SADABS<sup>iii</sup> (minimum and maximum transmission 0.6979, 0.7452).

The structure was solved by direct methods (SHELXS-97<sup>iv</sup>). There was a region of disordered dichloromethane solvent for which a reliable disorder model could not be devised; the X-ray data were

corrected for the presence of disordered solvent using SQUEEZE<sup>v</sup>. Refinement was by full-matrix least squares based on  $F^2$  using SHELXL-97.<sup>vi</sup> All reflections were used during refinement. The weighting scheme used was  $w=1/[\sigma^2(F_o^2) + (0.0523P)^2 + 1.7350P]$  where  $P = (F_o^2 + 2F_c^2)/3$ . Non-hydrogen atoms were refined anisotropically and hydrogen atoms were refined using a riding model. Refinement converged to  $R1=0.0418$  and  $wR2=0.1095$  for 8420 observed reflections for which  $F > 4\sigma(F)$  and  $R1=0.0490$  and  $wR2=0.1152$  and  $GOF = 1.100$  for all 9973 unique, non-zero reflections and 758 variables.<sup>vii</sup> The maximum  $\Delta/\sigma$  in the final cycle of least squares was 0.001 and the two most prominent peaks in the final difference Fourier were  $+0.541$  and  $-0.558 e/\text{\AA}^3$ .

Table 1. lists cell information, data collection parameters, and refinement data. Final positional and equivalent isotropic thermal parameters are given in Tables 2. and 3. Anisotropic thermal parameters are in Table 4. Tables 5. and 6. list bond distances and bond angles. Figures 1., 2., and 3. are ORTEP<sup>viii</sup> representations of the molecule with 30% probability thermal ellipsoids displayed.

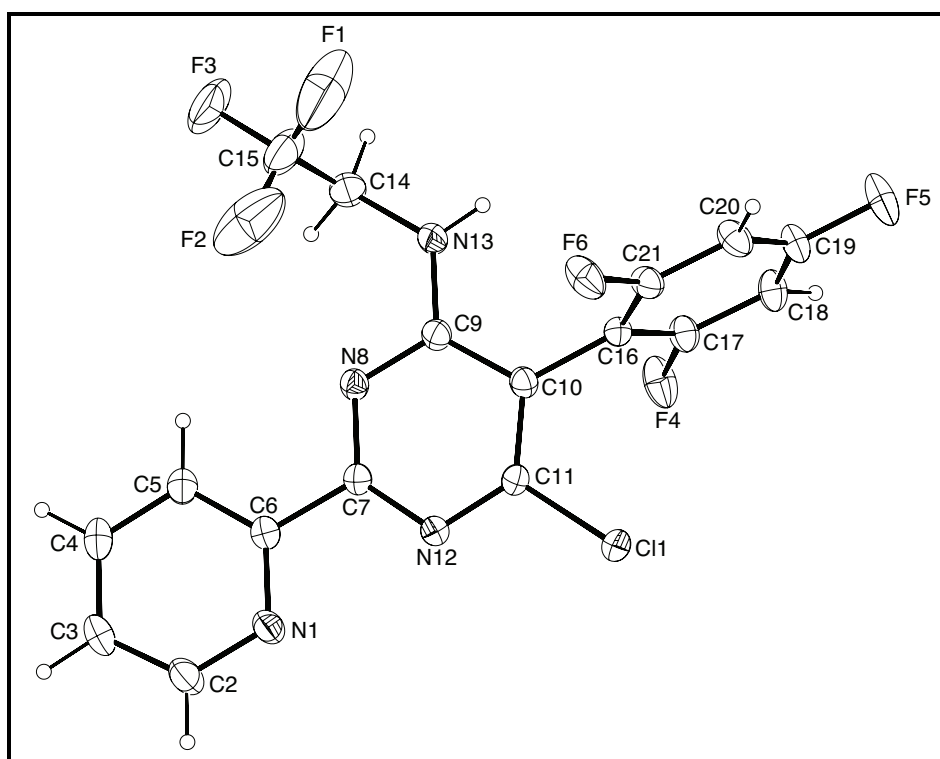

Figure 1. ORTEP drawing of molecule no. 1 of the asymmetric unit with 30% probability thermal ellipsoids.

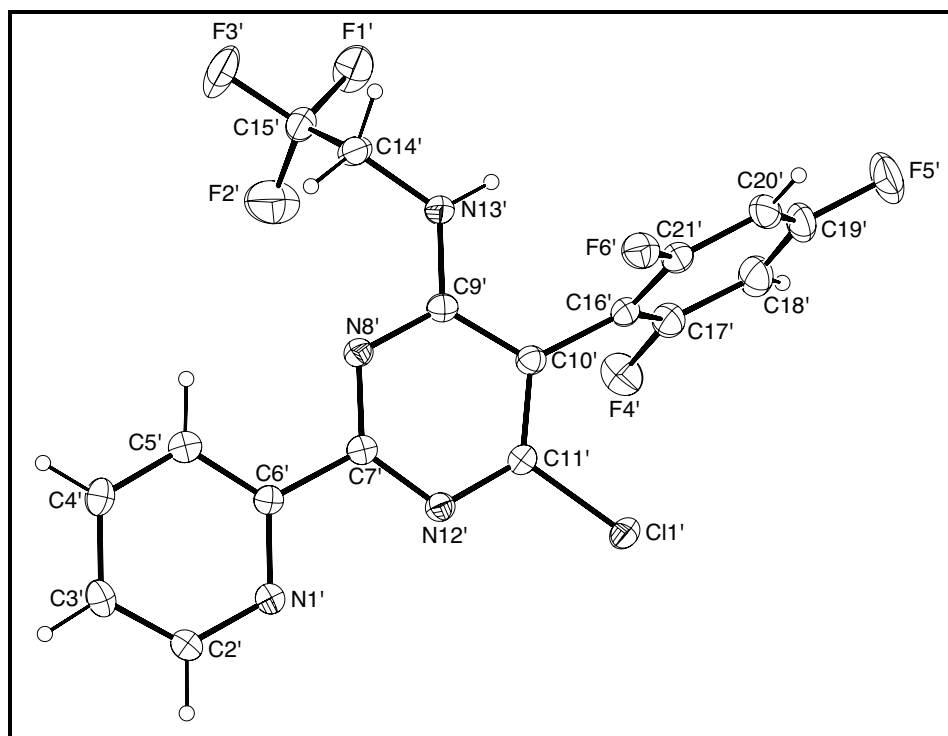

Figure 2. ORTEP drawing of molecule no. 2 of the asymmetric unit with 30% probability thermal ellipsoids.

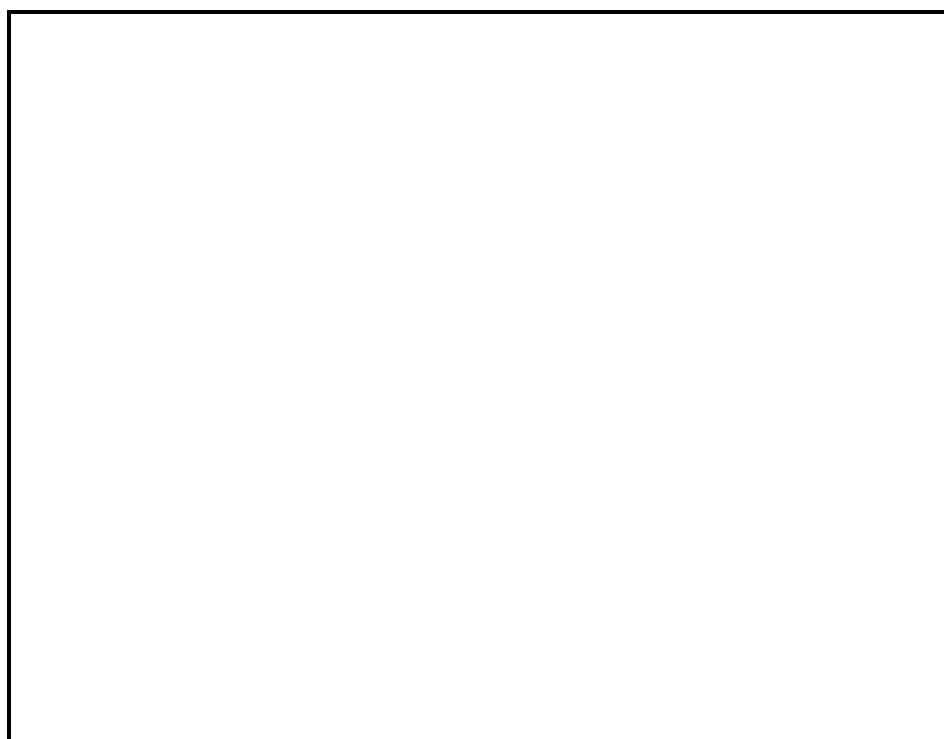

Figure 3. ORTEP drawing of molecule no. 3 of the asymmetric unit with 30% probability thermal ellipsoids.

**Table 1. Summary of Structure Determination of Compound 1342**

|                                   |                                                                                 |
|-----------------------------------|---------------------------------------------------------------------------------|
| Empirical formula                 | C <sub>51</sub> H <sub>27</sub> N <sub>12</sub> F <sub>18</sub> Cl <sub>3</sub> |
| Formula weight                    | 1256.20                                                                         |
| Temperature                       | 143(1) K                                                                        |
| Wavelength                        | 0.71073 Å                                                                       |
| Crystal system                    | triclinic                                                                       |
| Space group                       | P $\bar{1}$                                                                     |
| Cell constants:                   |                                                                                 |
| a                                 | 9.6735(9) Å                                                                     |
| b                                 | 17.3727(16) Å                                                                   |
| c                                 | 18.984(3) Å                                                                     |
| $\alpha$                          | 116.369(6)°                                                                     |
| $\beta$                           | 94.290(6)°                                                                      |
| $\gamma$                          | 102.067(4)°                                                                     |
| Volume                            | 2743.6(6) Å <sup>3</sup>                                                        |
| Z                                 | 2                                                                               |
| Density (calculated)              | 1.521 Mg/m <sup>3</sup>                                                         |
| Absorption coefficient            | 0.277 mm <sup>-1</sup>                                                          |
| F(000)                            | 1260                                                                            |
| Crystal size                      | 0.42 x 0.30 x 0.08 mm <sup>3</sup>                                              |
| Theta range for data collection   | 2.16 to 25.46°                                                                  |
| Index ranges                      | -11 ≤ h ≤ 11, -20 ≤ k ≤ 20, -22 ≤ l ≤ 22                                        |
| Reflections collected             | 54588                                                                           |
| Independent reflections           | 9973 [R(int) = 0.0221]                                                          |
| Completeness to theta = 25.46°    | 98.1 %                                                                          |
| Absorption correction             | Semi-empirical from equivalents                                                 |
| Max. and min. transmission        | 0.7452 and 0.6979                                                               |
| Refinement method                 | Full-matrix least-squares on F <sup>2</sup>                                     |
| Data / restraints / parameters    | 9973 / 0 / 758                                                                  |
| Goodness-of-fit on F <sup>2</sup> | 1.100                                                                           |
| Final R indices [I > 2σ(I)]       | R1 = 0.0418, wR2 = 0.1095                                                       |
| R indices (all data)              | R1 = 0.0490, wR2 = 0.1152                                                       |
| Largest diff. peak and hole       | 0.541 and -0.558 e.Å <sup>-3</sup>                                              |

Table 2. Refined Positional Parameters for Compound 1342

| Atom | x           | y           | z            | $U_{eq}, \text{Å}^2$ |
|------|-------------|-------------|--------------|----------------------|
| N1   | 0.8166(2)   | 0.89569(12) | 0.38599(11)  | 0.0409(4)            |
| C2   | 0.8011(3)   | 0.93399(16) | 0.33918(15)  | 0.0483(6)            |
| C3   | 0.7854(3)   | 1.01934(16) | 0.36733(15)  | 0.0457(5)            |
| C4   | 0.7898(3)   | 1.06860(16) | 0.44768(15)  | 0.0457(5)            |
| C5   | 0.8032(2)   | 1.02975(15) | 0.49690(14)  | 0.0400(5)            |
| C6   | 0.8150(2)   | 0.94320(13) | 0.46355(12)  | 0.0303(4)            |
| C7   | 0.8264(2)   | 0.89718(12) | 0.51339(11)  | 0.0285(4)            |
| N8   | 0.81890(18) | 0.94255(11) | 0.59020(10)  | 0.0309(4)            |
| C9   | 0.8289(2)   | 0.90249(13) | 0.63616(12)  | 0.0318(4)            |
| C10  | 0.8515(2)   | 0.81631(13) | 0.60421(12)  | 0.0313(4)            |
| C11  | 0.8536(2)   | 0.77707(13) | 0.52360(12)  | 0.0305(4)            |
| N12  | 0.84032(18) | 0.81383(11) | 0.47587(10)  | 0.0303(3)            |
| N13  | 0.8165(2)   | 0.94720(12) | 0.71315(10)  | 0.0425(4)            |
| C14  | 0.8111(3)   | 1.03908(15) | 0.74971(14)  | 0.0485(6)            |
| C15  | 0.6633(4)   | 1.05108(19) | 0.7495(2)    | 0.0719(9)            |
| C16  | 0.8730(2)   | 0.77124(13) | 0.65359(11)  | 0.0309(4)            |
| C17  | 1.0088(2)   | 0.76949(14) | 0.68087(13)  | 0.0358(4)            |
| C18  | 1.0345(2)   | 0.72719(15) | 0.72481(14)  | 0.0411(5)            |
| C19  | 0.9155(2)   | 0.68345(15) | 0.74097(14)  | 0.0399(5)            |
| C20  | 0.7775(2)   | 0.68088(17) | 0.71585(14)  | 0.0430(5)            |
| C21  | 0.7606(2)   | 0.72562(15) | 0.67307(13)  | 0.0374(5)            |
| Cl1  | 0.87222(7)  | 0.66915(4)  | 0.47631(3)   | 0.04536(15)          |
| F1   | 0.5900(4)   | 1.0181(2)   | 0.7877(3)    | 0.187(2)             |
| F2   | 0.5880(3)   | 1.0162(2)   | 0.67598(19)  | 0.1486(14)           |
| F3   | 0.6676(3)   | 1.13676(12) | 0.78584(14)  | 0.0994(7)            |
| F4   | 1.12268(14) | 0.81173(10) | 0.66266(10)  | 0.0559(4)            |
| F5   | 0.93741(15) | 0.64187(11) | 0.78470(10)  | 0.0603(4)            |
| F6   | 0.62692(14) | 0.72591(12) | 0.64871(9)   | 0.0570(4)            |
| N1'  | 0.54045(18) | 0.37955(11) | -0.01543(10) | 0.0325(4)            |
| C2'  | 0.5645(2)   | 0.32887(14) | -0.08834(12) | 0.0378(5)            |
| C3'  | 0.6854(2)   | 0.35081(15) | -0.11664(13) | 0.0383(5)            |
| C4'  | 0.7897(2)   | 0.42990(14) | -0.06701(13) | 0.0359(5)            |
| C5'  | 0.7676(2)   | 0.48358(13) | 0.00865(12)  | 0.0311(4)            |
| C6'  | 0.64195(19) | 0.45678(12) | 0.03224(11)  | 0.0262(4)            |
| C7'  | 0.6129(2)   | 0.51204(12) | 0.11282(11)  | 0.0260(4)            |
| N8'  | 0.72069(16) | 0.58213(10) | 0.16479(9)   | 0.0272(3)            |
| C9'  | 0.6960(2)   | 0.63067(12) | 0.23855(11)  | 0.0279(4)            |
| C10' | 0.5607(2)   | 0.61044(13) | 0.25908(11)  | 0.0289(4)            |
| C11' | 0.4616(2)   | 0.53591(13) | 0.19943(11)  | 0.0288(4)            |
| N12' | 0.48341(17) | 0.48499(10) | 0.12654(9)   | 0.0284(3)            |
| N13' | 0.80556(17) | 0.69949(11) | 0.29317(10)  | 0.0329(4)            |
| C14' | 0.9406(2)   | 0.72864(15) | 0.27441(13)  | 0.0370(5)            |
| C15' | 1.0581(2)   | 0.69916(16) | 0.30206(13)  | 0.0435(5)            |
| C16' | 0.5287(2)   | 0.66480(13) | 0.33895(12)  | 0.0323(4)            |
| C17' | 0.5164(2)   | 0.63512(15) | 0.39572(13)  | 0.0406(5)            |
| C18' | 0.4873(3)   | 0.68387(18) | 0.47030(14)  | 0.0501(6)            |
| C19' | 0.4684(3)   | 0.76582(18) | 0.48741(13)  | 0.0509(6)            |
| C20' | 0.4752(2)   | 0.80025(16) | 0.43472(14)  | 0.0469(6)            |
| C21' | 0.5050(2)   | 0.74783(14) | 0.36081(12)  | 0.0359(5)            |
| Cl1' | 0.29230(5)  | 0.50227(4)  | 0.21704(3)   | 0.03918(13)          |
| F1'  | 1.08979(16) | 0.73367(12) | 0.38125(8)   | 0.0630(4)            |
| F2'  | 1.0280(2)   | 0.61123(12) | 0.27177(14)  | 0.0909(7)            |
| F3'  | 1.18043(15) | 0.72622(15) | 0.28099(10)  | 0.0789(6)            |
| F4'  | 0.53497(17) | 0.55384(9)  | 0.37651(8)   | 0.0521(3)            |
| F5'  | 0.43998(19) | 0.81555(13) | 0.56035(9)   | 0.0747(5)            |
| F6'  | 0.50961(14) | 0.77812(8)  | 0.30661(8)   | 0.0441(3)            |
| N1'' | 1.00721(19) | 0.95184(12) | 0.84609(10)  | 0.0365(4)            |
| C2'' | 1.1399(3)   | 0.99464(15) | 0.84799(14)  | 0.0434(5)            |
| C3'' | 1.2609(3)   | 1.00298(15) | 0.89662(15)  | 0.0476(6)            |

|                                                                                                                                                             |             |             |             |             |
|-------------------------------------------------------------------------------------------------------------------------------------------------------------|-------------|-------------|-------------|-------------|
| C4"                                                                                                                                                         | 1.2446(2)   | 0.96462(16) | 0.94636(15) | 0.0466(5)   |
| C5"                                                                                                                                                         | 1.1090(2)   | 0.91914(15) | 0.94515(13) | 0.0386(5)   |
| C6"                                                                                                                                                         | 0.9931(2)   | 0.91395(13) | 0.89424(11) | 0.0307(4)   |
| C7"                                                                                                                                                         | 0.8440(2)   | 0.86536(13) | 0.89082(11) | 0.0294(4)   |
| N8"                                                                                                                                                         | 0.83392(17) | 0.81398(11) | 0.92667(9)  | 0.0291(3)   |
| C9"                                                                                                                                                         | 0.7012(2)   | 0.77097(12) | 0.92622(11) | 0.0281(4)   |
| C10"                                                                                                                                                        | 0.5774(2)   | 0.77924(13) | 0.88853(12) | 0.0308(4)   |
| C11"                                                                                                                                                        | 0.6053(2)   | 0.83274(14) | 0.85235(13) | 0.0347(4)   |
| N12"                                                                                                                                                        | 0.73525(18) | 0.87725(11) | 0.85229(10) | 0.0347(4)   |
| N13"                                                                                                                                                        | 0.68902(17) | 0.71877(11) | 0.96228(10) | 0.0314(4)   |
| C14"                                                                                                                                                        | 0.8069(2)   | 0.68915(13) | 0.98229(12) | 0.0319(4)   |
| C15"                                                                                                                                                        | 0.8860(2)   | 0.74706(14) | 1.06721(13) | 0.0369(5)   |
| C16"                                                                                                                                                        | 0.4314(2)   | 0.72922(14) | 0.88618(12) | 0.0328(4)   |
| C17"                                                                                                                                                        | 0.3602(2)   | 0.64716(14) | 0.82165(13) | 0.0352(4)   |
| C18"                                                                                                                                                        | 0.2281(2)   | 0.59612(15) | 0.81874(15) | 0.0410(5)   |
| C19"                                                                                                                                                        | 0.1664(2)   | 0.62981(16) | 0.88491(15) | 0.0409(5)   |
| C20"                                                                                                                                                        | 0.2277(2)   | 0.71073(17) | 0.95069(15) | 0.0433(5)   |
| C21"                                                                                                                                                        | 0.3595(2)   | 0.75839(15) | 0.94914(13) | 0.0391(5)   |
| Cl1"                                                                                                                                                        | 0.46135(6)  | 0.84401(4)  | 0.80065(4)  | 0.05298(17) |
| F1"                                                                                                                                                         | 0.80103(17) | 0.75734(12) | 1.12090(8)  | 0.0637(4)   |
| F2"                                                                                                                                                         | 0.95687(19) | 0.82886(9)  | 1.08157(9)  | 0.0651(4)   |
| F3"                                                                                                                                                         | 0.98544(14) | 0.71166(10) | 1.08524(8)  | 0.0482(3)   |
| F4"                                                                                                                                                         | 0.42598(15) | 0.61492(9)  | 0.75865(8)  | 0.0518(3)   |
| F5"                                                                                                                                                         | 0.03932(13) | 0.58019(10) | 0.88504(10) | 0.0543(4)   |
| F6"                                                                                                                                                         | 0.42356(16) | 0.83819(10) | 1.01384(9)  | 0.0596(4)   |
| $U_{eq} = \frac{1}{3}[U_{11}(aa^*)^2 + U_{22}(bb^*)^2 + U_{33}(cc^*)^2 + 2U_{12}aa^*bb^*\cos\gamma + 2U_{13}aa^*cc^*\cos\beta + 2U_{23}bb^*cc^*\cos\alpha]$ |             |             |             |             |

**Table 3. Positional Parameters for Hydrogens in Compound 1342**

| Atom   | x      | y      | z       | $U_{iso}, \text{Å}^2$ |
|--------|--------|--------|---------|-----------------------|
| H2     | 0.8010 | 0.9013 | 0.2849  | 0.064                 |
| H3     | 0.7722 | 1.0428 | 0.3326  | 0.061                 |
| H4     | 0.7839 | 1.1272 | 0.4689  | 0.061                 |
| H5     | 0.8042 | 1.0614 | 0.5514  | 0.053                 |
| H13    | 0.8116 | 0.9201 | 0.7417  | 0.056                 |
| H14a   | 0.8609 | 1.0680 | 0.7217  | 0.065                 |
| H14b   | 0.8629 | 1.0691 | 0.8047  | 0.065                 |
| H18    | 1.1273 | 0.7281 | 0.7426  | 0.055                 |
| H20    | 0.6989 | 0.6503 | 0.7272  | 0.057                 |
| H2'    | 0.4952 | 0.2756 | -0.1219 | 0.050                 |
| H3'    | 0.6970 | 0.3135 | -0.1679 | 0.051                 |
| H4'    | 0.8729 | 0.4466 | -0.0842 | 0.048                 |
| H5'    | 0.8361 | 0.5369 | 0.0432  | 0.041                 |
| H13'   | 0.7933 | 0.7271 | 0.3417  | 0.044                 |
| H14a'  | 0.9683 | 0.7933 | 0.2991  | 0.049                 |
| H14b'  | 0.9292 | 0.7057 | 0.2169  | 0.049                 |
| H18'   | 0.4807 | 0.6622 | 0.5071  | 0.067                 |
| H20'   | 0.4604 | 0.8559 | 0.4480  | 0.062                 |
| H2''   | 1.1515 | 1.0205 | 0.8144  | 0.058                 |
| H3''   | 1.3514 | 1.0338 | 0.8959  | 0.063                 |
| H4''   | 1.3242 | 0.9694 | 0.9803  | 0.062                 |
| H5''   | 1.0955 | 0.8923 | 0.9779  | 0.051                 |
| H13''  | 0.6072 | 0.7026 | 0.9738  | 0.042                 |
| H14a'' | 0.8739 | 0.6881 | 0.9466  | 0.042                 |
| H14b'' | 0.7703 | 0.6286 | 0.9737  | 0.042                 |
| H18''  | 0.1830 | 0.5415 | 0.7742  | 0.055                 |
| H20''  | 0.1825 | 0.7325 | 0.9943  | 0.058                 |

Table 4. Refined Thermal Parameters (U's) for Compound 1342

| Atom | U <sub>11</sub> | U <sub>22</sub> | U <sub>33</sub> | U <sub>23</sub> | U <sub>13</sub> | U <sub>12</sub> |
|------|-----------------|-----------------|-----------------|-----------------|-----------------|-----------------|
| N1   | 0.0545(11)      | 0.0365(10)      | 0.0345(10)      | 0.0205(8)       | 0.0055(8)       | 0.0102(8)       |
| C2   | 0.0644(16)      | 0.0455(13)      | 0.0402(12)      | 0.0273(11)      | 0.0064(11)      | 0.0100(11)      |
| C3   | 0.0487(13)      | 0.0497(13)      | 0.0519(14)      | 0.0371(12)      | 0.0050(11)      | 0.0104(11)      |
| C4   | 0.0476(13)      | 0.0404(12)      | 0.0607(15)      | 0.0319(12)      | 0.0091(11)      | 0.0166(10)      |
| C5   | 0.0447(12)      | 0.0376(11)      | 0.0423(12)      | 0.0211(10)      | 0.0075(10)      | 0.0153(10)      |
| C6   | 0.0242(9)       | 0.0309(10)      | 0.0346(10)      | 0.0168(9)       | 0.0009(8)       | 0.0039(8)       |
| C7   | 0.0255(9)       | 0.0273(9)       | 0.0309(10)      | 0.0137(8)       | 0.0012(7)       | 0.0052(7)       |
| N8   | 0.0324(9)       | 0.0285(8)       | 0.0292(9)       | 0.0126(7)       | -0.0004(7)      | 0.0078(7)       |
| C9   | 0.0320(10)      | 0.0314(10)      | 0.0286(10)      | 0.0123(8)       | -0.0005(8)      | 0.0085(8)       |
| C10  | 0.0314(10)      | 0.0342(10)      | 0.0316(10)      | 0.0178(9)       | 0.0042(8)       | 0.0110(8)       |
| C11  | 0.0311(10)      | 0.0301(10)      | 0.0334(10)      | 0.0157(8)       | 0.0069(8)       | 0.0124(8)       |
| N12  | 0.0324(9)       | 0.0318(9)       | 0.0294(8)       | 0.0158(7)       | 0.0060(7)       | 0.0106(7)       |
| N13  | 0.0652(13)      | 0.0380(10)      | 0.0263(9)       | 0.0140(8)       | 0.0038(8)       | 0.0226(9)       |
| C14  | 0.0677(16)      | 0.0346(12)      | 0.0316(11)      | 0.0073(10)      | 0.0009(11)      | 0.0129(11)      |
| C15  | 0.089(2)        | 0.0415(15)      | 0.092(2)        | 0.0284(16)      | 0.040(2)        | 0.0307(15)      |
| C16  | 0.0356(10)      | 0.0311(10)      | 0.0283(10)      | 0.0140(8)       | 0.0058(8)       | 0.0135(8)       |
| C17  | 0.0323(10)      | 0.0353(11)      | 0.0439(12)      | 0.0236(10)      | 0.0053(9)       | 0.0069(8)       |
| C18  | 0.0321(11)      | 0.0441(12)      | 0.0545(14)      | 0.0306(11)      | 0.0000(9)       | 0.0108(9)       |
| C19  | 0.0390(12)      | 0.0467(12)      | 0.0463(13)      | 0.0332(11)      | 0.0034(9)       | 0.0118(10)      |
| C20  | 0.0350(11)      | 0.0592(14)      | 0.0474(13)      | 0.0361(12)      | 0.0101(10)      | 0.0110(10)      |
| C21  | 0.0308(10)      | 0.0534(13)      | 0.0354(11)      | 0.0246(10)      | 0.0070(8)       | 0.0171(9)       |
| Cl1  | 0.0714(4)       | 0.0368(3)       | 0.0401(3)       | 0.0208(2)       | 0.0205(3)       | 0.0291(3)       |
| F1   | 0.207(3)        | 0.134(2)        | 0.356(5)        | 0.175(3)        | 0.220(4)        | 0.116(2)        |
| F2   | 0.0784(16)      | 0.142(2)        | 0.140(2)        | -0.0139(19)     | -0.0185(15)     | 0.0613(15)      |
| F3   | 0.1354(19)      | 0.0487(10)      | 0.1261(18)      | 0.0352(11)      | 0.0538(15)      | 0.0527(11)      |
| F4   | 0.0342(7)       | 0.0655(9)       | 0.0889(11)      | 0.0592(9)       | 0.0055(7)       | 0.0039(6)       |
| F5   | 0.0452(8)       | 0.0819(11)      | 0.0852(11)      | 0.0698(10)      | 0.0033(7)       | 0.0121(7)       |
| F6   | 0.0323(7)       | 0.1012(12)      | 0.0652(9)       | 0.0596(9)       | 0.0115(6)       | 0.0250(7)       |
| N1'  | 0.0316(9)       | 0.0319(9)       | 0.0302(9)       | 0.0114(7)       | 0.0075(7)       | 0.0078(7)       |
| C2'  | 0.0372(11)      | 0.0343(11)      | 0.0312(11)      | 0.0076(9)       | 0.0065(9)       | 0.0069(9)       |
| C3'  | 0.0447(12)      | 0.0416(12)      | 0.0293(10)      | 0.0142(9)       | 0.0124(9)       | 0.0174(10)      |
| C4'  | 0.0356(11)      | 0.0442(12)      | 0.0386(11)      | 0.0254(10)      | 0.0149(9)       | 0.0155(9)       |
| C5'  | 0.0327(10)      | 0.0311(10)      | 0.0330(10)      | 0.0186(9)       | 0.0039(8)       | 0.0084(8)       |
| C6'  | 0.0259(9)       | 0.0276(9)       | 0.0272(9)       | 0.0145(8)       | 0.0023(7)       | 0.0089(7)       |
| C7'  | 0.0274(9)       | 0.0262(9)       | 0.0286(9)       | 0.0161(8)       | 0.0030(7)       | 0.0088(7)       |
| N8'  | 0.0254(8)       | 0.0284(8)       | 0.0275(8)       | 0.0135(7)       | 0.0040(6)       | 0.0064(6)       |
| C9'  | 0.0273(9)       | 0.0276(9)       | 0.0284(10)      | 0.0138(8)       | 0.0019(7)       | 0.0066(8)       |
| C10' | 0.0267(9)       | 0.0293(10)      | 0.0292(10)      | 0.0132(8)       | 0.0033(8)       | 0.0068(8)       |
| C11' | 0.0254(9)       | 0.0311(10)      | 0.0309(10)      | 0.0156(8)       | 0.0062(8)       | 0.0072(8)       |
| N12' | 0.0266(8)       | 0.0289(8)       | 0.0285(8)       | 0.0133(7)       | 0.0043(6)       | 0.0060(6)       |
| N13' | 0.0271(8)       | 0.0344(9)       | 0.0275(8)       | 0.0085(7)       | 0.0047(7)       | 0.0032(7)       |
| C14' | 0.0303(10)      | 0.0402(11)      | 0.0316(11)      | 0.0147(9)       | 0.0031(8)       | -0.0017(9)      |
| C15' | 0.0289(11)      | 0.0532(14)      | 0.0377(12)      | 0.0138(10)      | 0.0091(9)       | 0.0068(10)      |
| C16' | 0.0226(9)       | 0.0362(11)      | 0.0298(10)      | 0.0098(9)       | 0.0035(8)       | 0.0053(8)       |
| C17' | 0.0364(11)      | 0.0462(13)      | 0.0334(11)      | 0.0147(10)      | 0.0065(9)       | 0.0094(10)      |
| C18' | 0.0453(13)      | 0.0682(17)      | 0.0330(12)      | 0.0204(12)      | 0.0096(10)      | 0.0149(12)      |
| C19' | 0.0389(12)      | 0.0681(17)      | 0.0279(11)      | 0.0059(11)      | 0.0082(9)       | 0.0175(11)      |
| C20' | 0.0322(11)      | 0.0443(13)      | 0.0449(13)      | 0.0031(11)      | 0.0030(9)       | 0.0154(10)      |
| C21' | 0.0252(10)      | 0.0399(11)      | 0.0346(11)      | 0.0119(9)       | 0.0016(8)       | 0.0075(8)       |
| Cl1' | 0.0274(2)       | 0.0450(3)       | 0.0355(3)       | 0.0140(2)       | 0.0092(2)       | 0.0013(2)       |
| F1'  | 0.0436(8)       | 0.1033(13)      | 0.0410(8)       | 0.0351(8)       | 0.0047(6)       | 0.0167(8)       |
| F2'  | 0.0617(11)      | 0.0548(10)      | 0.1255(17)      | 0.0152(10)      | -0.0079(10)     | 0.0276(8)       |
| F3'  | 0.0296(7)       | 0.1422(17)      | 0.0597(10)      | 0.0458(11)      | 0.0177(7)       | 0.0140(9)       |
| F4'  | 0.0698(10)      | 0.0501(8)       | 0.0431(8)       | 0.0262(6)       | 0.0116(7)       | 0.0190(7)       |
| F5'  | 0.0735(11)      | 0.0965(13)      | 0.0352(8)       | 0.0062(8)       | 0.0188(7)       | 0.0403(10)      |
| F6'  | 0.0432(7)       | 0.0393(7)       | 0.0493(8)       | 0.0202(6)       | 0.0055(6)       | 0.0129(6)       |
| N1'' | 0.0401(10)      | 0.0348(9)       | 0.0347(9)       | 0.0184(8)       | 0.0094(7)       | 0.0047(8)       |
| C2'' | 0.0457(13)      | 0.0413(12)      | 0.0475(13)      | 0.0260(11)      | 0.0166(10)      | 0.0055(10)      |
| C3'' | 0.0360(12)      | 0.0396(12)      | 0.0605(15)      | 0.0210(11)      | 0.0142(11)      | 0.0013(10)      |



|      |            |            |            |            |             |            |
|------|------------|------------|------------|------------|-------------|------------|
| C4"  | 0.0331(12) | 0.0469(13) | 0.0547(14) | 0.0232(12) | 0.0027(10)  | 0.0047(10) |
| C5"  | 0.0343(11) | 0.0416(12) | 0.0389(12) | 0.0206(10) | 0.0051(9)   | 0.0053(9)  |
| C6"  | 0.0336(10) | 0.0282(10) | 0.0272(10) | 0.0115(8)  | 0.0062(8)   | 0.0057(8)  |
| C7"  | 0.0331(10) | 0.0294(10) | 0.0237(9)  | 0.0123(8)  | 0.0041(8)   | 0.0056(8)  |
| N8"  | 0.0275(8)  | 0.0307(8)  | 0.0276(8)  | 0.0144(7)  | 0.0026(6)   | 0.0043(7)  |
| C9"  | 0.0282(9)  | 0.0292(9)  | 0.0265(9)  | 0.0138(8)  | 0.0050(7)   | 0.0057(8)  |
| C10" | 0.0276(10) | 0.0321(10) | 0.0324(10) | 0.0163(9)  | 0.0030(8)   | 0.0059(8)  |
| C11" | 0.0309(10) | 0.0378(11) | 0.0382(11) | 0.0214(9)  | 0.0014(8)   | 0.0085(8)  |
| N12" | 0.0328(9)  | 0.0375(9)  | 0.0378(9)  | 0.0236(8)  | 0.0028(7)   | 0.0056(7)  |
| N13" | 0.0245(8)  | 0.0367(9)  | 0.0382(9)  | 0.0238(8)  | 0.0041(7)   | 0.0048(7)  |
| C14" | 0.0313(10) | 0.0319(10) | 0.0348(11) | 0.0189(9)  | 0.0030(8)   | 0.0071(8)  |
| C15" | 0.0363(11) | 0.0415(12) | 0.0350(11) | 0.0213(10) | 0.0028(9)   | 0.0088(9)  |
| C16" | 0.0269(10) | 0.0374(11) | 0.0408(11) | 0.0248(9)  | 0.0037(8)   | 0.0082(8)  |
| C17" | 0.0307(10) | 0.0365(11) | 0.0432(12) | 0.0217(10) | 0.0069(9)   | 0.0116(9)  |
| C18" | 0.0312(11) | 0.0351(11) | 0.0574(14) | 0.0253(11) | -0.0023(10) | 0.0059(9)  |
| C19" | 0.0227(10) | 0.0514(13) | 0.0648(15) | 0.0423(12) | 0.0048(10)  | 0.0083(9)  |
| C20" | 0.0306(11) | 0.0604(15) | 0.0513(14) | 0.0344(12) | 0.0129(10)  | 0.0162(10) |
| C21" | 0.0328(11) | 0.0429(12) | 0.0411(12) | 0.0208(10) | 0.0049(9)   | 0.0078(9)  |
| Cl1" | 0.0342(3)  | 0.0675(4)  | 0.0771(4)  | 0.0548(4)  | -0.0008(3)  | 0.0091(3)  |
| F1"  | 0.0584(9)  | 0.1033(13) | 0.0373(8)  | 0.0329(8)  | 0.0143(7)   | 0.0360(9)  |
| F2"  | 0.0834(11) | 0.0404(8)  | 0.0500(8)  | 0.0195(7)  | -0.0239(8)  | -0.0087(7) |
| F3"  | 0.0397(7)  | 0.0668(9)  | 0.0466(8)  | 0.0345(7)  | 0.0000(6)   | 0.0164(6)  |
| F4"  | 0.0457(8)  | 0.0454(8)  | 0.0503(8)  | 0.0124(6)  | 0.0131(6)   | 0.0069(6)  |
| F5"  | 0.0252(6)  | 0.0685(9)  | 0.0866(11) | 0.0560(9)  | 0.0058(6)   | 0.0040(6)  |
| F6"  | 0.0484(8)  | 0.0604(9)  | 0.0468(8)  | 0.0102(7)  | 0.0132(6)   | 0.0023(7)  |

The form of the anisotropic displacement parameter is:

$$\exp[-2\pi(a^*{}^2U_{11}h^2+b^*{}^2U_{22}k^2+c^*{}^2U_{33}l^2+2b^*c^*U_{23}kl+2a^*c^*U_{13}hl+2a^*b^*U_{12}hk)]$$

**Table 5. Bond Distances in Compound 1342, Å**

|             |            |             |          |             |          |
|-------------|------------|-------------|----------|-------------|----------|
| N1-C6       | 1.334(3)   | N1-C2       | 1.342(3) | C2-C3       | 1.382(3) |
| C3-C4       | 1.370(4)   | C4-C5       | 1.387(3) | C5-C6       | 1.383(3) |
| C6-C7       | 1.497(3)   | C7-N8       | 1.331(3) | C7-N12      | 1.342(2) |
| N8-C9       | 1.345(3)   | C9-N13      | 1.346(3) | C9-C10      | 1.417(3) |
| C10-C11     | 1.375(3)   | C10-C16     | 1.492(3) | C11-N12     | 1.333(3) |
| C11-C11     | 1.7387(19) | N13-C14     | 1.445(3) | C14-C15     | 1.487(4) |
| C15-F1      | 1.277(4)   | C15-F3      | 1.323(3) | C15-F2      | 1.327(4) |
| C16-C21     | 1.381(3)   | C16-C17     | 1.387(3) | C17-F4      | 1.347(2) |
| C17-C18     | 1.374(3)   | C18-C19     | 1.375(3) | C19-F5      | 1.351(2) |
| C19-C20     | 1.369(3)   | C20-C21     | 1.373(3) | C21-F6      | 1.342(2) |
| N1'-C2'     | 1.340(3)   | N1'-C6'     | 1.349(2) | C2'-C3'     | 1.375(3) |
| C3'-C4'     | 1.386(3)   | C4'-C5'     | 1.385(3) | C5'-C6'     | 1.387(3) |
| C6'-C7'     | 1.488(3)   | C7'-N12'    | 1.330(2) | C7'-N8'     | 1.338(2) |
| N8'-C9'     | 1.347(2)   | C9'-N13'    | 1.354(2) | C9'-C10'    | 1.412(3) |
| C10'-C11'   | 1.376(3)   | C10'-C16'   | 1.486(3) | C11'-N12'   | 1.333(2) |
| C11'-C11'   | 1.7297(19) | N13'-C14'   | 1.429(3) | C14'-C15'   | 1.491(3) |
| C15'-F2'    | 1.326(3)   | C15'-F1'    | 1.329(3) | C15'-F3'    | 1.337(3) |
| C16'-C21'   | 1.387(3)   | C16'-C17'   | 1.389(3) | C17'-F4'    | 1.348(3) |
| C17'-C18'   | 1.377(3)   | C18'-C19'   | 1.368(4) | C19'-F5'    | 1.354(3) |
| C19'-C20'   | 1.374(4)   | C20'-C21'   | 1.385(3) | C21'-F6'    | 1.348(3) |
| N1''-C2''   | 1.331(3)   | N1''-C6''   | 1.343(3) | C2''-C3''   | 1.375(4) |
| C3''-C4''   | 1.378(4)   | C4''-C5''   | 1.375(3) | C5''-C6''   | 1.385(3) |
| C6''-C7''   | 1.492(3)   | C7''-N8''   | 1.335(2) | C7''-N12''  | 1.340(3) |
| N8''-C9''   | 1.341(2)   | C9''-N13''  | 1.350(2) | C9''-C10''  | 1.415(3) |
| C10''-C11'' | 1.378(3)   | C10''-C16'' | 1.482(3) | C11''-N12'' | 1.331(3) |
| C11''-C11'' | 1.738(2)   | N13''-C14'' | 1.436(2) | C14''-C15'' | 1.500(3) |
| C15''-F1''  | 1.331(3)   | C15''-F2''  | 1.336(3) | C15''-F3''  | 1.343(2) |
| C16''-C21'' | 1.379(3)   | C16''-C17'' | 1.385(3) | C17''-F4''  | 1.348(3) |
| C17''-C18'' | 1.376(3)   | C18''-C19'' | 1.372(3) | C19''-F5''  | 1.347(2) |
| C19''-C20'' | 1.367(4)   | C20''-C21'' | 1.378(3) | C21''-F6''  | 1.352(3) |

Table 6. Bond Angles in Compound 1342, °

|                   |            |                   |            |                   |            |
|-------------------|------------|-------------------|------------|-------------------|------------|
| C6-N1-C2          | 117.37(19) | N1-C2-C3          | 123.5(2)   | C4-C3-C2          | 118.4(2)   |
| C3-C4-C5          | 119.0(2)   | C6-C5-C4          | 118.9(2)   | N1-C6-C5          | 122.75(19) |
| N1-C6-C7          | 115.98(17) | C5-C6-C7          | 121.26(18) | N8-C7-N12         | 126.60(17) |
| N8-C7-C6          | 116.55(16) | N12-C7-C6         | 116.83(17) | C7-N8-C9          | 117.60(16) |
| N8-C9-N13         | 117.58(18) | N8-C9-C10         | 120.90(18) | N13-C9-C10        | 121.52(18) |
| C11-C10-C9        | 114.74(17) | C11-C10-C16       | 122.08(17) | C9-C10-C16        | 123.17(17) |
| N12-C11-C10       | 125.87(18) | N12-C11-Cl1       | 114.96(15) | C10-C11-Cl1       | 119.16(15) |
| C11-N12-C7        | 114.16(16) | C9-N13-C14        | 122.52(18) | N13-C14-C15       | 114.7(2)   |
| F1-C15-F3         | 104.7(3)   | F1-C15-F2         | 107.9(4)   | F3-C15-F2         | 106.9(3)   |
| F1-C15-C14        | 113.6(3)   | F3-C15-C14        | 110.9(3)   | F2-C15-C14        | 112.3(3)   |
| C21-C16-C17       | 114.99(18) | C21-C16-C10       | 123.13(18) | C17-C16-C10       | 121.84(18) |
| F4-C17-C18        | 118.02(18) | F4-C17-C16        | 117.70(18) | C18-C17-C16       | 124.28(19) |
| C17-C18-C19       | 116.35(19) | F5-C19-C20        | 118.84(19) | F5-C19-C18        | 117.74(19) |
| C20-C19-C18       | 123.42(19) | C19-C20-C21       | 116.8(2)   | F6-C21-C20        | 118.46(19) |
| F6-C21-C16        | 117.40(18) | C20-C21-C16       | 124.14(19) | C2'-N1'-C6'       | 117.15(17) |
| N1'-C2'-C3'       | 124.0(2)   | C2'-C3'-C4'       | 118.42(19) | C5'-C4'-C3'       | 118.78(19) |
| C4'-C5'-C6'       | 119.08(19) | N1'-C6'-C5'       | 122.53(17) | N1'-C6'-C7'       | 116.24(16) |
| C5'-C6'-C7'       | 121.22(17) | N12'-C7'-N8'      | 126.66(17) | N12'-C7'-C6'      | 116.40(16) |
| N8'-C7'-C6'       | 116.92(16) | C7'-N8'-C9'       | 116.98(16) | N8'-C9'-N13'      | 117.98(17) |
| N8'-C9'-C10'      | 121.43(17) | N13'-C9'-C10'     | 120.59(17) | C11'-C10'-C9'     | 114.54(17) |
| C11'-C10'-C16'    | 122.84(17) | C9'-C10'-C16'     | 122.61(17) | N12'-C11'-C10'    | 125.65(18) |
| N12'-C11'-Cl1'    | 114.90(14) | C10'-C11'-Cl1'    | 119.45(15) | C7'-N12'-C11'     | 114.66(16) |
| C9'-N13'-C14'     | 123.39(17) | N13'-C14'-C15'    | 113.16(18) | F2'-C15'-F1'      | 107.0(2)   |
| F2'-C15'-F3'      | 107.6(2)   | F1'-C15'-F3'      | 105.22(18) | F2'-C15'-C14'     | 112.83(19) |
| F1'-C15'-C14'     | 113.27(19) | F3'-C15'-C14'     | 110.5(2)   | C21'-C16'-C17'    | 115.58(19) |
| C21'-C16'-C10'    | 121.95(19) | C17'-C16'-C10'    | 122.46(19) | F4'-C17'-C18'     | 118.3(2)   |
| F4'-C17'-C16'     | 117.79(18) | C18'-C17'-C16'    | 123.9(2)   | C19'-C18'-C17'    | 116.6(2)   |
| F5'-C19'-C18'     | 118.0(2)   | F5'-C19'-C20'     | 118.1(2)   | C18'-C19'-C20'    | 123.9(2)   |
| C19'-C20'-C21'    | 116.5(2)   | F6'-C21'-C20'     | 118.6(2)   | F6'-C21'-C16'     | 117.97(18) |
| C20'-C21'-C16'    | 123.4(2)   | C2''-N1''-C6''    | 117.05(19) | N1''-C2''-C3''    | 124.0(2)   |
| C2''-C3''-C4''    | 118.4(2)   | C5''-C4''-C3''    | 119.0(2)   | C4''-C5''-C6''    | 118.8(2)   |
| N1''-C6''-C5''    | 122.76(19) | N1''-C6''-C7''    | 116.48(17) | C5''-C6''-C7''    | 120.76(18) |
| N8''-C7''-N12''   | 127.00(18) | N8''-C7''-C6''    | 115.78(17) | N12''-C7''-C6''   | 117.23(17) |
| C7''-N8''-C9''    | 117.24(16) | N8''-C9''-N13''   | 118.03(17) | N8''-C9''-C10''   | 121.14(17) |
| N13''-C9''-C10''  | 120.82(17) | C11''-C10''-C9''  | 114.82(17) | C11''-C10''-C16'' | 124.39(18) |
| C9''-C10''-C16''  | 120.72(17) | N12''-C11''-C10'' | 125.76(18) | N12''-C11''-Cl1'' | 115.47(15) |
| C10''-C11''-Cl1'' | 118.77(16) | C11''-N12''-C7''  | 114.01(17) | C9''-N13''-C14''  | 122.78(16) |
| N13''-C14''-C15'' | 113.23(17) | F1''-C15''-F2''   | 106.78(19) | F1''-C15''-F3''   | 106.05(17) |
| F2''-C15''-F3''   | 106.12(17) | F1''-C15''-C14''  | 113.45(18) | F2''-C15''-C14''  | 113.06(17) |
| F3''-C15''-C14''  | 110.85(18) | C21''-C16''-C17'' | 115.15(19) | C21''-C16''-C10'' | 122.79(19) |
| C17''-C16''-C10'' | 121.98(19) | F4''-C17''-C18''  | 118.3(2)   | F4''-C17''-C16''  | 117.73(18) |
| C18''-C17''-C16'' | 124.0(2)   | C19''-C18''-C17'' | 116.6(2)   | F5''-C19''-C20''  | 118.5(2)   |
| F5''-C19''-C18''  | 118.1(2)   | C20''-C19''-C18'' | 123.4(2)   | C19''-C20''-C21'' | 116.7(2)   |
| F6''-C21''-C20''  | 118.0(2)   | F6''-C21''-C16''  | 117.88(19) | C20''-C21''-C16'' | 124.1(2)   |

---

<sup>i</sup> Bruker (2009) SAINT. Bruker AXS Inc., Madison, Wisconsin, USA.

<sup>ii</sup> Bruker (2009) SHELXTL. Bruker AXS Inc., Madison, Wisconsin, USA.

<sup>iii</sup> Sheldrick, G.M. (2007) SADABS. University of Gottingen, Germany.

<sup>iv</sup> Sheldrick, G.M. (2008) *Acta Cryst.* A64,112-122.

<sup>v</sup> v.d. Sluis, P. & A.L. Spek (1990). *Acta. Cryst.*, **A46**, 194.

<sup>vi</sup> Sheldrick, G.M. (2008) *Acta Cryst.* A64,112-122.

<sup>vii</sup>  $R1 = \sum |F_o| - |F_c| / \sum |F_o|$

$wR2 = [\sum w(F_o^2 - F_c^2)^2 / \sum w(F_o^2)^2]^{1/2}$

$GOF = [\sum w(F_o^2 - F_c^2)^2 / (n - p)]^{1/2}$

where n = the number of reflections and p = the number of parameters refined.

<sup>viii</sup> "ORTEP-II: A Fortran Thermal Ellipsoid Plot Program for Crystal Structure Illustrations". C.K. Johnson (1976) ORNL-5138.

### X-ray Structure Determination of Compound 36 (CCDC 992820)

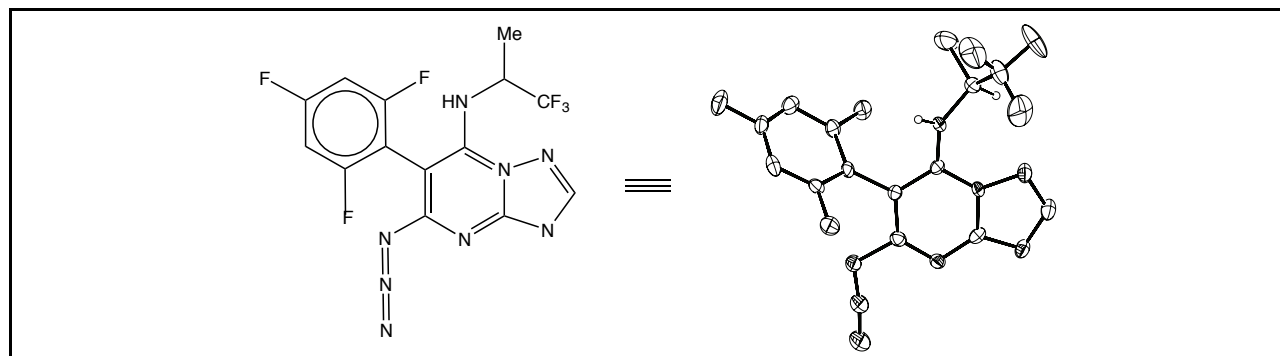

Compound 1384,  $C_{14}H_8N_8F_6$ , crystallizes in the monoclinic space group  $P2_1$  (systematic absences  $0k0: k=\text{odd}$ ) with  $a=12.7869(7)\text{\AA}$ ,  $b=9.6365(5)\text{\AA}$ ,  $c=13.9992(7)\text{\AA}$ ,  $\beta=107.054(2)^\circ$ ,  $V=1649.14(15)\text{\AA}^3$ ,  $Z=4$ , and  $d_{\text{calc}}=1.620\text{ g/cm}^3$ . X-ray intensity data were collected on a Bruker APEXII CCD area detector employing graphite-monochromated Mo- $K\alpha$  radiation ( $\lambda=0.71073\text{ \AA}$ ) at a temperature of  $100(1)\text{K}$ . Preliminary indexing was performed from a series of thirty-six  $0.5^\circ$  rotation frames with exposures of 10 seconds. A total of 1498 frames were collected with a crystal to detector distance of 37.4 mm, rotation widths of  $0.5^\circ$  and exposures of 10 seconds:

| scan type | $2\theta$ | $\omega$ | $\phi$ | $\chi$ | frames |
|-----------|-----------|----------|--------|--------|--------|
| $\phi$    | 19.50     | 59.55    | 348.71 | -26.26 | 739    |
| $\omega$  | 14.50     | 283.75   | 54.11  | 21.36  | 197    |
| $\phi$    | -23.00    | 334.21   | 158.53 | 73.66  | 496    |
| $\omega$  | -8.00     | 320.74   | 277.32 | 84.61  | 66     |

Rotation frames were integrated using SAINT<sup>i</sup>, producing a listing of unaveraged  $F^2$  and  $\sigma(F^2)$  values which were then passed to the SHELXTL<sup>ii</sup> program package for further processing and structure solution. A total of 19505 reflections were measured over the ranges  $1.67 \leq \theta \leq 25.40^\circ$ ,  $-15 \leq h \leq 15$ ,  $-11 \leq k \leq 11$ ,  $-16 \leq l \leq 16$  yielding 5913 unique reflections ( $R_{\text{int}} = 0.0380$ ). The intensity data were corrected for Lorentz and polarization effects and for absorption using SADABS<sup>iii</sup> (minimum and maximum transmission 0.5973, 0.7452).

The structure was solved by direct methods (SHELXS-97<sup>iv</sup>). The asymmetric unit consists of two

molecules of the title compound. Refinement was by full-matrix least squares based on  $F^2$  using SHELXL-97.<sup>v</sup> All reflections were used during refinement. The weighting scheme used was  $w=1/[\sigma^2(F_o^2) + (0.0636P)^2 + 0.2595P]$  where  $P = (F_o^2 + 2F_c^2)/3$ . Non-hydrogen atoms were refined anisotropically and hydrogen atoms were refined using a riding model. Refinement converged to  $R1=0.0426$  and  $wR2=0.1027$  for 4714 observed reflections for which  $F > 4\sigma(F)$  and  $R1=0.0619$  and  $wR2=0.1129$  and  $GOF = 1.035$  for all 5913 unique, non-zero reflections and 508 variables.<sup>vi</sup> The maximum  $\Delta/\sigma$  in the final cycle of least squares was 0.000 and the two most prominent peaks in the final difference Fourier were  $+0.262$  and  $-0.269 \text{ e}/\text{\AA}^3$ .

Table 1. lists cell information, data collection parameters, and refinement data. Final positional and equivalent isotropic thermal parameters are given in Tables 2. and 3. Anisotropic thermal parameters are in Table 4. Tables 5. and 6. list bond distances and bond angles. Figures 1. and 2. are ORTEP<sup>vii</sup> representations of the molecule with 50% probability thermal ellipsoids displayed.

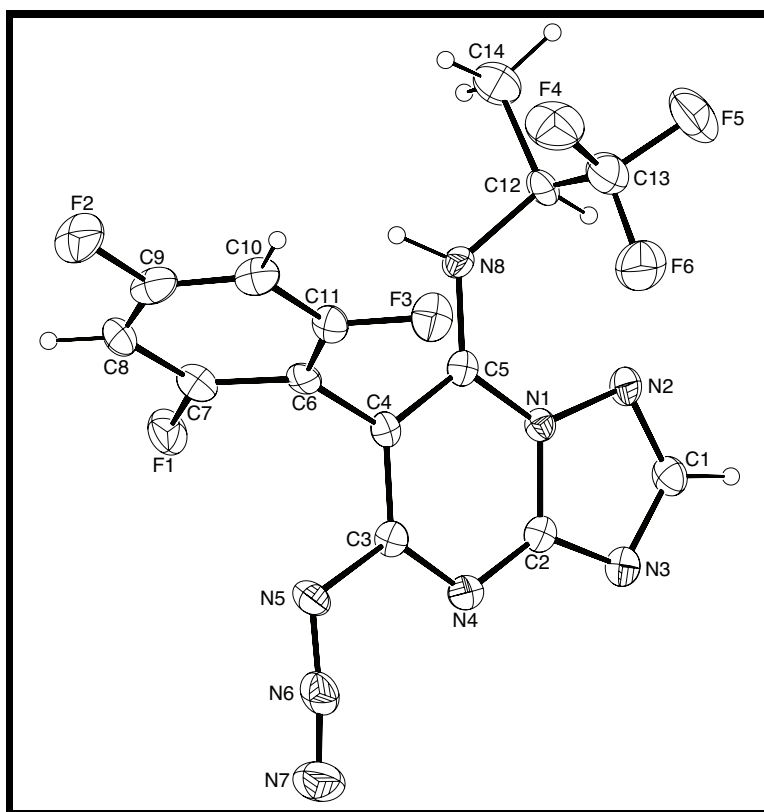

Figure 1. ORTEP drawing of molecule no. 1 of the asymmetric unit with 50% probability thermal ellipsoids.

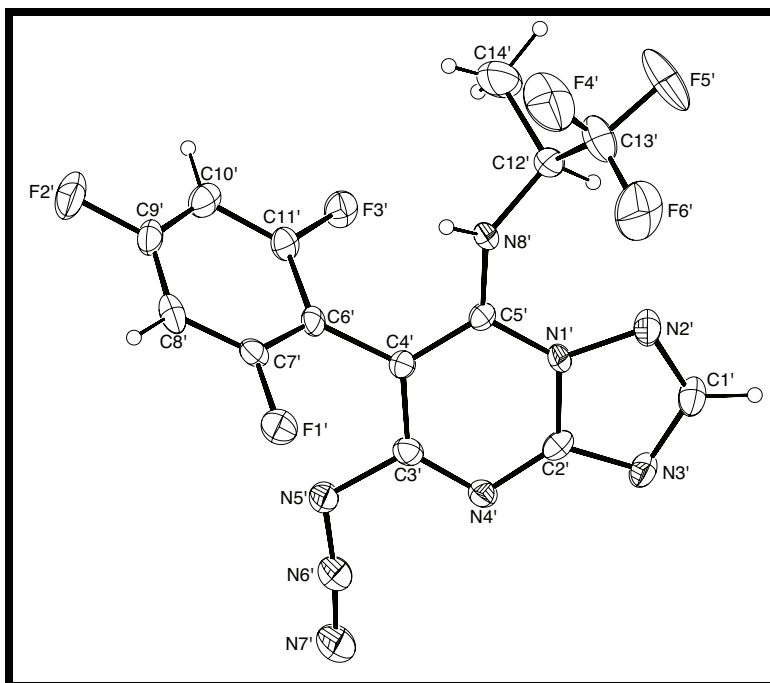

Figure 2. ORTEP drawing of molecule no. 2 of the asymmetric unit with 50% probability thermal ellipsoids.

**Table 1. Summary of Structure Determination of Compound 1384**

|                                   |                                                              |
|-----------------------------------|--------------------------------------------------------------|
| Empirical formula                 | C <sub>14</sub> H <sub>8</sub> N <sub>8</sub> F <sub>6</sub> |
| Formula weight                    | 402.28                                                       |
| Temperature                       | 100(1) K                                                     |
| Wavelength                        | 0.71073 Å                                                    |
| Crystal system                    | monoclinic                                                   |
| Space group                       | P2 <sub>1</sub>                                              |
| Cell constants:                   |                                                              |
| a                                 | 12.7869(7) Å                                                 |
| b                                 | 9.6365(5) Å                                                  |
| c                                 | 13.9992(7) Å                                                 |
| β                                 | 107.054(2)°                                                  |
| Volume                            | 1649.14(15) Å <sup>3</sup>                                   |
| Z                                 | 4                                                            |
| Density (calculated)              | 1.620 Mg/m <sup>3</sup>                                      |
| Absorption coefficient            | 0.153 mm <sup>-1</sup>                                       |
| F(000)                            | 808                                                          |
| Crystal size                      | 0.32 x 0.18 x 0.04 mm <sup>3</sup>                           |
| Theta range for data collection   | 1.67 to 25.40°                                               |
| Index ranges                      | -15 ≤ h ≤ 15, -11 ≤ k ≤ 11, -16 ≤ l ≤ 16                     |
| Reflections collected             | 19505                                                        |
| Independent reflections           | 5913 [R(int) = 0.0380]                                       |
| Completeness to theta = 25.40°    | 99.6 %                                                       |
| Absorption correction             | Semi-empirical from equivalents                              |
| Max. and min. transmission        | 0.7452 and 0.5973                                            |
| Refinement method                 | Full-matrix least-squares on F <sup>2</sup>                  |
| Data / restraints / parameters    | 5913 / 1 / 508                                               |
| Goodness-of-fit on F <sup>2</sup> | 1.035                                                        |
| Final R indices [I > 2σ(I)]       | R1 = 0.0426, wR2 = 0.1027                                    |
| R indices (all data)              | R1 = 0.0619, wR2 = 0.1129                                    |
| Absolute structure parameter      | 0.5(7)                                                       |
| Largest diff. peak and hole       | 0.262 and -0.269 e.Å <sup>-3</sup>                           |



Table 2. Refined Positional Parameters for Compound 1384

| Atom | x            | y         | z            | $U_{eq}, \text{Å}^2$ |
|------|--------------|-----------|--------------|----------------------|
| C1   | 0.0765(3)    | 0.4464(4) | 0.2853(2)    | 0.0230(8)            |
| C2   | 0.1868(2)    | 0.5887(3) | 0.2565(2)    | 0.0182(7)            |
| C3   | 0.2952(2)    | 0.6980(3) | 0.1796(2)    | 0.0179(7)            |
| C4   | 0.2702(2)    | 0.6051(3) | 0.0995(2)    | 0.0165(7)            |
| C5   | 0.1957(2)    | 0.4974(3) | 0.0976(2)    | 0.0172(7)            |
| C6   | 0.3269(2)    | 0.6137(3) | 0.0211(2)    | 0.0188(7)            |
| C7   | 0.3141(3)    | 0.7241(3) | -0.0449(2)   | 0.0246(8)            |
| C8   | 0.3675(3)    | 0.7346(4) | -0.1177(2)   | 0.0284(8)            |
| C9   | 0.4370(3)    | 0.6283(4) | -0.1217(2)   | 0.0298(9)            |
| C10  | 0.4546(3)    | 0.5149(4) | -0.0607(2)   | 0.0268(8)            |
| C11  | 0.3987(2)    | 0.5110(4) | 0.0102(2)    | 0.0213(7)            |
| C12  | 0.1105(3)    | 0.2734(3) | 0.0166(2)    | 0.0234(7)            |
| C13  | 0.2001(3)    | 0.1676(4) | 0.0588(3)    | 0.0359(8)            |
| C14  | 0.0466(3)    | 0.2371(4) | -0.0899(3)   | 0.0423(10)           |
| N1   | 0.15816(19)  | 0.4919(3) | 0.17972(18)  | 0.0169(6)            |
| N2   | 0.0833(2)    | 0.3983(3) | 0.19832(18)  | 0.0221(6)            |
| N3   | 0.1365(2)    | 0.5593(3) | 0.32387(19)  | 0.0218(6)            |
| N4   | 0.2546(2)    | 0.6937(3) | 0.25719(18)  | 0.0202(6)            |
| N5   | 0.3724(2)    | 0.8056(3) | 0.1786(2)    | 0.0234(6)            |
| N6   | 0.3828(2)    | 0.8874(3) | 0.2487(2)    | 0.0288(7)            |
| N7   | 0.3985(3)    | 0.9690(4) | 0.3093(2)    | 0.0393(8)            |
| N8   | 0.15876(19)  | 0.4106(3) | 0.01930(18)  | 0.0194(6)            |
| F1   | 0.24295(17)  | 0.8246(2) | -0.03960(14) | 0.0331(5)            |
| F2   | 0.48918(16)  | 0.6347(3) | -0.19400(15) | 0.0417(6)            |
| F3   | 0.41485(15)  | 0.4020(2) | 0.07159(13)  | 0.0302(5)            |
| F4   | 0.26574(18)  | 0.1488(2) | 0.00208(17)  | 0.0472(6)            |
| F5   | 0.1568(2)    | 0.0436(2) | 0.06882(19)  | 0.0582(7)            |
| F6   | 0.26334(18)  | 0.2044(2) | 0.14953(14)  | 0.0459(6)            |
| C1'  | 0.0883(3)    | 0.6406(4) | 0.7847(2)    | 0.0270(8)            |
| C2'  | 0.1902(2)    | 0.4855(4) | 0.7540(2)    | 0.0188(7)            |
| C3'  | 0.2911(3)    | 0.3674(3) | 0.6766(2)    | 0.0202(7)            |
| C4'  | 0.2747(2)    | 0.4645(3) | 0.5985(2)    | 0.0180(7)            |
| C5'  | 0.2084(2)    | 0.5784(3) | 0.5995(2)    | 0.0162(7)            |
| C6'  | 0.3314(2)    | 0.4521(3) | 0.5195(2)    | 0.0181(7)            |
| C7'  | 0.3120(2)    | 0.3454(3) | 0.4497(2)    | 0.0198(7)            |
| C8'  | 0.3634(3)    | 0.3329(4) | 0.3773(2)    | 0.0257(8)            |
| C9'  | 0.4371(3)    | 0.4357(4) | 0.3739(2)    | 0.0254(8)            |
| C10' | 0.4604(3)    | 0.5463(4) | 0.4382(2)    | 0.0264(8)            |
| C11' | 0.4068(2)    | 0.5507(4) | 0.5099(2)    | 0.0212(7)            |
| C12' | 0.1573(3)    | 0.8188(4) | 0.5324(2)    | 0.0248(7)            |
| C13' | 0.0452(3)    | 0.8545(4) | 0.4686(3)    | 0.0410(9)            |
| C14' | 0.2423(3)    | 0.9067(5) | 0.5026(4)    | 0.0536(12)           |
| N1'  | 0.1705(2)    | 0.5885(3) | 0.68155(19)  | 0.0179(6)            |
| N2'  | 0.1026(2)    | 0.6878(3) | 0.70146(19)  | 0.0252(6)            |
| N3'  | 0.1379(2)    | 0.5188(3) | 0.82068(19)  | 0.0236(7)            |
| N4'  | 0.2500(2)    | 0.3731(3) | 0.75252(18)  | 0.0196(6)            |
| N5'  | 0.3627(2)    | 0.2537(3) | 0.6741(2)    | 0.0263(7)            |
| N6'  | 0.3721(2)    | 0.1729(3) | 0.7448(2)    | 0.0357(8)            |
| N7'  | 0.3874(3)    | 0.0924(4) | 0.8050(3)    | 0.0514(10)           |
| N8'  | 0.1796(2)    | 0.6720(3) | 0.52512(18)  | 0.0178(6)            |
| F1'  | 0.23763(16)  | 0.2482(2) | 0.45463(14)  | 0.0324(5)            |
| F2'  | 0.48880(16)  | 0.4290(3) | 0.30222(14)  | 0.0417(6)            |
| F3'  | 0.42695(14)  | 0.6581(2) | 0.57457(13)  | 0.0275(5)            |
| F4'  | 0.0317(2)    | 0.8447(3) | 0.37181(15)  | 0.0646(8)            |
| F5'  | 0.0202(2)    | 0.9851(3) | 0.4865(2)    | 0.0711(8)            |
| F6'  | -0.03139(16) | 0.7729(3) | 0.48670(19)  | 0.0630(7)            |

$U_{eq} = \frac{1}{3}[U_{11}(aa^*)^2 + U_{22}(bb^*)^2 + U_{33}(cc^*)^2 + 2U_{12}aa^*bb^*\cos\gamma + 2U_{13}aa^*cc^*\cos\beta + 2U_{23}bb^*cc^*\cos\alpha]$

**Table 3. Positional Parameters for Hydrogens in Compound 1384**

| Atom  | x       | y      | z       | $U_{iso}, \text{Å}^2$ |
|-------|---------|--------|---------|-----------------------|
| H1    | 0.0318  | 0.4038 | 0.3184  | 0.031                 |
| H8    | 0.3567  | 0.8097 | -0.1612 | 0.038                 |
| H10   | 0.5017  | 0.4440 | -0.0665 | 0.036                 |
| H12   | 0.0605  | 0.2740 | 0.0578  | 0.031                 |
| H14a  | -0.0150 | 0.2983 | -0.1123 | 0.063                 |
| H14b  | 0.0214  | 0.1430 | -0.0925 | 0.063                 |
| H14c  | 0.0930  | 0.2472 | -0.1324 | 0.063                 |
| H8a   | 0.1645  | 0.4406 | -0.0368 | 0.026                 |
| H1'   | 0.0460  | 0.6885 | 0.8177  | 0.036                 |
| H8'   | 0.3493  | 0.2590 | 0.3326  | 0.034                 |
| H10'  | 0.5100  | 0.6147 | 0.4335  | 0.035                 |
| H12'  | 0.1619  | 0.8399 | 0.6020  | 0.033                 |
| H14a' | 0.3119  | 0.8977 | 0.5524  | 0.080                 |
| H14b' | 0.2200  | 1.0023 | 0.4974  | 0.080                 |
| H14c' | 0.2483  | 0.8755 | 0.4393  | 0.080                 |
| H8a'  | 0.1737  | 0.6412 | 0.4661  | 0.024                 |

**Table 4. Refined Thermal Parameters (U's) for Compound 1384**

| Atom | U <sub>11</sub> | U <sub>22</sub> | U <sub>33</sub> | U <sub>23</sub> | U <sub>13</sub> | U <sub>12</sub> |
|------|-----------------|-----------------|-----------------|-----------------|-----------------|-----------------|
| C1   | 0.0214(17)      | 0.0227(19)      | 0.0278(18)      | 0.0010(15)      | 0.0119(14)      | -0.0027(14)     |
| C2   | 0.0159(16)      | 0.0201(18)      | 0.0191(16)      | 0.0026(14)      | 0.0057(13)      | 0.0042(14)      |
| C3   | 0.0117(15)      | 0.0220(18)      | 0.0204(15)      | 0.0011(15)      | 0.0052(12)      | -0.0009(13)     |
| C4   | 0.0122(15)      | 0.0164(17)      | 0.0197(16)      | 0.0037(14)      | 0.0027(12)      | 0.0014(13)      |
| C5   | 0.0153(15)      | 0.0184(17)      | 0.0185(16)      | 0.0030(14)      | 0.0057(12)      | 0.0034(13)      |
| C6   | 0.0146(15)      | 0.0207(18)      | 0.0213(16)      | -0.0039(15)     | 0.0059(13)      | -0.0091(14)     |
| C7   | 0.0216(18)      | 0.020(2)        | 0.0321(19)      | -0.0028(16)     | 0.0083(15)      | -0.0014(15)     |
| C8   | 0.034(2)        | 0.022(2)        | 0.0281(18)      | 0.0007(16)      | 0.0081(16)      | -0.0130(16)     |
| C9   | 0.0241(18)      | 0.045(2)        | 0.0253(18)      | -0.0100(18)     | 0.0142(15)      | -0.0121(17)     |
| C10  | 0.0209(17)      | 0.034(2)        | 0.0271(18)      | -0.0057(17)     | 0.0095(14)      | -0.0016(15)     |
| C11  | 0.0150(16)      | 0.024(2)        | 0.0251(17)      | 0.0004(15)      | 0.0063(13)      | -0.0041(14)     |
| C12  | 0.0268(17)      | 0.0185(17)      | 0.0273(16)      | -0.0012(13)     | 0.0116(14)      | -0.0105(15)     |
| C13  | 0.050(2)        | 0.025(2)        | 0.038(2)        | -0.0036(16)     | 0.0210(18)      | -0.0033(17)     |
| C14  | 0.044(2)        | 0.039(2)        | 0.040(2)        | -0.0056(19)     | 0.0064(18)      | -0.0224(19)     |
| N1   | 0.0164(13)      | 0.0170(14)      | 0.0189(13)      | 0.0006(11)      | 0.0075(10)      | -0.0001(11)     |
| N2   | 0.0215(13)      | 0.0247(16)      | 0.0235(13)      | 0.0018(12)      | 0.0118(11)      | -0.0066(12)     |
| N3   | 0.0195(14)      | 0.0238(17)      | 0.0234(14)      | 0.0029(13)      | 0.0081(12)      | 0.0024(12)      |
| N4   | 0.0192(13)      | 0.0207(16)      | 0.0202(13)      | -0.0003(12)     | 0.0047(11)      | 0.0022(12)      |
| N5   | 0.0260(15)      | 0.0170(16)      | 0.0301(15)      | -0.0038(13)     | 0.0125(12)      | -0.0034(12)     |
| N6   | 0.0236(15)      | 0.0280(18)      | 0.0347(17)      | 0.0018(16)      | 0.0083(13)      | -0.0086(13)     |
| N7   | 0.0391(18)      | 0.038(2)        | 0.0400(18)      | -0.0115(17)     | 0.0108(15)      | -0.0125(16)     |
| N8   | 0.0220(14)      | 0.0223(15)      | 0.0153(13)      | -0.0014(11)     | 0.0077(10)      | -0.0053(12)     |
| F1   | 0.0430(12)      | 0.0205(11)      | 0.0389(11)      | 0.0042(9)       | 0.0169(9)       | 0.0064(10)      |
| F2   | 0.0412(12)      | 0.0572(16)      | 0.0369(12)      | -0.0049(11)     | 0.0272(10)      | -0.0111(11)     |
| F3   | 0.0268(10)      | 0.0318(12)      | 0.0342(10)      | 0.0065(9)       | 0.0122(8)       | 0.0100(9)       |
| F4   | 0.0509(13)      | 0.0418(14)      | 0.0562(14)      | -0.0121(12)     | 0.0271(11)      | 0.0053(11)      |
| F5   | 0.0875(18)      | 0.0226(12)      | 0.0716(16)      | -0.0001(11)     | 0.0343(14)      | -0.0064(12)     |
| F6   | 0.0558(14)      | 0.0394(13)      | 0.0360(11)      | 0.0045(10)      | 0.0033(10)      | 0.0126(11)      |
| C1'  | 0.0250(17)      | 0.037(2)        | 0.0215(17)      | -0.0015(16)     | 0.0101(14)      | 0.0063(17)      |
| C2'  | 0.0151(15)      | 0.0257(19)      | 0.0150(15)      | 0.0000(15)      | 0.0034(13)      | -0.0050(15)     |
| C3'  | 0.0191(16)      | 0.0164(18)      | 0.0247(17)      | -0.0003(15)     | 0.0058(13)      | -0.0013(14)     |
| C4'  | 0.0155(15)      | 0.0179(19)      | 0.0214(16)      | 0.0007(14)      | 0.0070(13)      | 0.0005(14)      |
| C5'  | 0.0116(15)      | 0.0189(18)      | 0.0181(16)      | -0.0001(13)     | 0.0043(12)      | -0.0019(13)     |
| C6'  | 0.0149(15)      | 0.0217(19)      | 0.0178(15)      | 0.0042(14)      | 0.0048(12)      | 0.0085(13)      |
| C7'  | 0.0181(16)      | 0.0150(18)      | 0.0252(16)      | 0.0011(15)      | 0.0048(13)      | 0.0028(14)      |
| C8'  | 0.0269(18)      | 0.027(2)        | 0.0214(16)      | -0.0049(15)     | 0.0046(14)      | 0.0113(16)      |
| C9'  | 0.0232(17)      | 0.033(2)        | 0.0230(18)      | 0.0063(16)      | 0.0117(14)      | 0.0118(16)      |
| C10' | 0.0155(16)      | 0.035(2)        | 0.0292(18)      | 0.0084(17)      | 0.0072(14)      | 0.0039(15)      |
| C11' | 0.0141(15)      | 0.0240(19)      | 0.0245(17)      | -0.0002(15)     | 0.0040(13)      | 0.0030(14)      |
| C12' | 0.0240(17)      | 0.0218(18)      | 0.0311(17)      | 0.0062(15)      | 0.0119(14)      | 0.0047(14)      |
| C13' | 0.034(2)        | 0.038(2)        | 0.050(2)        | 0.0000(19)      | 0.0106(17)      | 0.0175(18)      |
| C14' | 0.047(2)        | 0.027(2)        | 0.095(3)        | 0.009(2)        | 0.035(2)        | -0.0015(19)     |
| N1'  | 0.0169(13)      | 0.0170(15)      | 0.0208(13)      | 0.0020(11)      | 0.0071(11)      | 0.0061(11)      |
| N2'  | 0.0245(15)      | 0.0299(17)      | 0.0233(14)      | -0.0003(13)     | 0.0101(11)      | 0.0073(13)      |
| N3'  | 0.0227(15)      | 0.0317(18)      | 0.0190(14)      | 0.0008(13)      | 0.0100(12)      | 0.0025(12)      |
| N4'  | 0.0180(13)      | 0.0169(16)      | 0.0241(14)      | 0.0022(12)      | 0.0065(11)      | 0.0015(11)      |
| N5'  | 0.0288(15)      | 0.0272(17)      | 0.0264(15)      | 0.0095(13)      | 0.0134(12)      | 0.0109(13)      |
| N6'  | 0.0394(18)      | 0.0294(19)      | 0.0436(19)      | 0.0103(17)      | 0.0203(15)      | 0.0123(15)      |
| N7'  | 0.062(2)        | 0.040(2)        | 0.061(2)        | 0.024(2)        | 0.034(2)        | 0.0269(19)      |
| N8'  | 0.0193(13)      | 0.0147(14)      | 0.0201(13)      | 0.0004(12)      | 0.0071(10)      | 0.0038(11)      |
| F1'  | 0.0374(11)      | 0.0230(12)      | 0.0396(11)      | -0.0058(9)      | 0.0155(9)       | -0.0046(9)      |
| F2'  | 0.0411(12)      | 0.0580(16)      | 0.0349(12)      | 0.0002(11)      | 0.0249(10)      | 0.0085(11)      |
| F3'  | 0.0198(9)       | 0.0282(12)      | 0.0352(10)      | -0.0053(9)      | 0.0091(8)       | -0.0053(8)      |
| F4'  | 0.0749(18)      | 0.0729(18)      | 0.0357(13)      | 0.0083(12)      | 0.0001(12)      | 0.0352(15)      |
| F5'  | 0.0649(17)      | 0.0479(16)      | 0.0900(19)      | -0.0040(14)     | 0.0063(14)      | 0.0420(14)      |
| F6'  | 0.0211(12)      | 0.0843(19)      | 0.0816(17)      | 0.0049(14)      | 0.0119(11)      | 0.0061(12)      |

The form of the anisotropic displacement parameter is:

$$\exp[-2\pi(a^*U_{11}h^2+b^*U_{22}k^2+c^*U_{33}l^2+2b^*c^*U_{23}kl+2a^*c^*U_{13}hl+2a^*b^*U_{12}hk)]$$

**Table 5. Bond Distances in Compound 1384, Å**

|          |          |           |          |           |          |
|----------|----------|-----------|----------|-----------|----------|
| C1-N2    | 1.329(4) | C1-N3     | 1.350(4) | C2-N3     | 1.319(4) |
| C2-N4    | 1.330(4) | C2-N1     | 1.389(4) | C3-N4     | 1.335(4) |
| C3-C4    | 1.397(4) | C3-N5     | 1.434(4) | C4-C5     | 1.404(4) |
| C4-C6    | 1.484(4) | C5-N8     | 1.349(4) | C5-N1     | 1.371(4) |
| C6-C7    | 1.387(5) | C6-C11    | 1.389(5) | C7-F1     | 1.345(4) |
| C7-C8    | 1.386(5) | C8-C9     | 1.369(5) | C9-C10    | 1.364(5) |
| C9-F2    | 1.367(3) | C10-C11   | 1.384(4) | C11-F3    | 1.334(4) |
| C12-N8   | 1.455(4) | C12-C14   | 1.516(5) | C12-C13   | 1.518(5) |
| C13-F4   | 1.326(4) | C13-F6    | 1.338(4) | C13-F5    | 1.342(4) |
| N1-N2    | 1.394(4) | N5-N6     | 1.236(4) | N6-N7     | 1.131(4) |
| C1'-N2'  | 1.313(4) | C1'-N3'   | 1.359(5) | C2'-N4'   | 1.331(4) |
| C2'-N3'  | 1.336(4) | C2'-N1'   | 1.388(4) | C3'-N4'   | 1.318(4) |
| C3'-C4'  | 1.407(4) | C3'-N5'   | 1.435(4) | C4'-C5'   | 1.389(4) |
| C4'-C6'  | 1.494(4) | C5'-N8'   | 1.345(4) | C5'-N1'   | 1.375(4) |
| C6'-C11' | 1.388(5) | C6'-C7'   | 1.389(4) | C7'-F1'   | 1.352(4) |
| C7'-C8'  | 1.366(4) | C8'-C9'   | 1.378(5) | C9'-F2'   | 1.355(3) |
| C9'-C10' | 1.370(5) | C10'-C11' | 1.372(4) | C11'-F3'  | 1.350(4) |
| C12'-N8' | 1.453(4) | C12'-C13' | 1.489(5) | C12'-C14' | 1.529(5) |
| C13'-F4' | 1.318(4) | C13'-F6'  | 1.336(5) | C13'-F5'  | 1.341(4) |
| N1'-N2'  | 1.375(4) | N5'-N6'   | 1.236(4) | N6'-N7'   | 1.120(4) |

**Table 6. Bond Angles in Compound 1384, °**

|               |          |               |          |                |          |
|---------------|----------|---------------|----------|----------------|----------|
| N2-C1-N3      | 117.7(3) | N3-C2-N4      | 127.7(3) | N3-C2-N1       | 109.6(3) |
| N4-C2-N1      | 122.7(3) | N4-C3-C4      | 125.5(3) | N4-C3-N5       | 117.6(3) |
| C4-C3-N5      | 116.8(3) | C3-C4-C5      | 118.9(3) | C3-C4-C6       | 120.7(3) |
| C5-C4-C6      | 120.2(3) | N8-C5-N1      | 122.2(3) | N8-C5-C4       | 123.2(3) |
| N1-C5-C4      | 114.5(3) | C7-C6-C11     | 115.2(3) | C7-C6-C4       | 123.2(3) |
| C11-C6-C4     | 121.5(3) | F1-C7-C8      | 118.3(3) | F1-C7-C6       | 117.7(3) |
| C8-C7-C6      | 124.0(3) | C9-C8-C7      | 116.2(3) | C10-C9-F2      | 118.2(3) |
| C10-C9-C8     | 124.3(3) | F2-C9-C8      | 117.4(3) | C9-C10-C11     | 116.5(3) |
| F3-C11-C10    | 118.0(3) | F3-C11-C6     | 118.2(3) | C10-C11-C6     | 123.8(3) |
| N8-C12-C14    | 109.7(3) | N8-C12-C13    | 109.6(3) | C14-C12-C13    | 110.8(3) |
| F4-C13-F6     | 107.0(3) | F4-C13-F5     | 107.1(3) | F6-C13-F5      | 106.8(3) |
| F4-C13-C12    | 113.3(3) | F6-C13-C12    | 111.6(3) | F5-C13-C12     | 110.6(3) |
| C5-N1-C2      | 123.0(3) | C5-N1-N2      | 127.6(3) | C2-N1-N2       | 109.3(2) |
| C1-N2-N1      | 100.3(3) | C2-N3-C1      | 103.1(3) | C2-N4-C3       | 115.2(3) |
| N6-N5-C3      | 111.5(3) | N7-N6-N5      | 173.7(3) | C5-N8-C12      | 129.0(3) |
| N2'-C1'-N3'   | 117.2(3) | N4'-C2'-N3'   | 127.9(3) | N4'-C2'-N1'    | 123.5(3) |
| N3'-C2'-N1'   | 108.6(3) | N4'-C3'-C4'   | 126.5(3) | N4'-C3'-N5'    | 117.3(3) |
| C4'-C3'-N5'   | 116.1(3) | C5'-C4'-C3'   | 118.0(3) | C5'-C4'-C6'    | 120.0(3) |
| C3'-C4'-C6'   | 121.8(3) | N8'-C5'-N1'   | 121.0(3) | N8'-C5'-C4'    | 123.5(3) |
| N1'-C5'-C4'   | 115.4(3) | C11'-C6'-C7'  | 115.0(3) | C11'-C6'-C4'   | 121.3(3) |
| C7'-C6'-C4'   | 123.7(3) | F1'-C7'-C8'   | 118.4(3) | F1'-C7'-C6'    | 117.4(3) |
| C8'-C7'-C6'   | 124.2(3) | C7'-C8'-C9'   | 116.4(3) | F2'-C9'-C10'   | 117.6(3) |
| F2'-C9'-C8'   | 118.6(3) | C10'-C9'-C8'  | 123.8(3) | C9'-C10'-C11'  | 116.4(3) |
| F3'-C11'-C10' | 118.4(3) | F3'-C11'-C6'  | 117.5(3) | C10'-C11'-C6'  | 124.1(3) |
| N8'-C12'-C13' | 110.9(3) | N8'-C12'-C14' | 110.5(3) | C13'-C12'-C14' | 110.2(3) |
| F4'-C13'-F6'  | 105.7(3) | F4'-C13'-F5'  | 107.1(3) | F6'-C13'-F5'   | 106.8(3) |
| F4'-C13'-C12' | 114.3(3) | F6'-C13'-C12' | 112.4(3) | F5'-C13'-C12'  | 110.2(3) |
| N2'-N1'-C5'   | 128.1(3) | N2'-N1'-C2'   | 109.8(2) | C5'-N1'-C2'    | 121.8(3) |
| C1'-N2'-N1'   | 101.5(3) | C2'-N3'-C1'   | 102.9(3) | C3'-N4'-C2'    | 114.4(3) |
| N6'-N5'-C3'   | 112.0(3) | N7'-N6'-N5'   | 173.1(4) | C5'-N8'-C12'   | 127.9(3) |

---

<sup>i</sup>Bruker (2009) SAINT. Bruker AXS Inc., Madison, Wisconsin, USA.

<sup>ii</sup>Bruker (2009) SHELXTL. Bruker AXS Inc., Madison, Wisconsin, USA.

<sup>iii</sup>Sheldrick, G.M. (2007) SADABS. University of Gottingen, Germany.

<sup>iv</sup>Sheldrick, G.M. (2008) Acta Cryst. A64,112-122.

<sup>v</sup>Sheldrick, G.M. (2008) Acta Cryst. A64,112-122.

<sup>vi</sup> $R1 = \sum |F_o| - |F_c| / \sum |F_o|$

$wR2 = [\sum w(F_o^2 - F_c^2)^2 / \sum w(F_o^2)^2]^{1/2}$

$GOF = [\sum w(F_o^2 - F_c^2)^2 / (n - p)]^{1/2}$

where n = the number of reflections and p = the number of parameters refined.

<sup>vii</sup>“ORTEP-II: A Fortran Thermal Ellipsoid Plot Program for Crystal Structure Illustrations”. C.K. Johnson (1976) ORNL-5138.

### X-ray Structure Determination of Compound 43 (CCDC 992823)

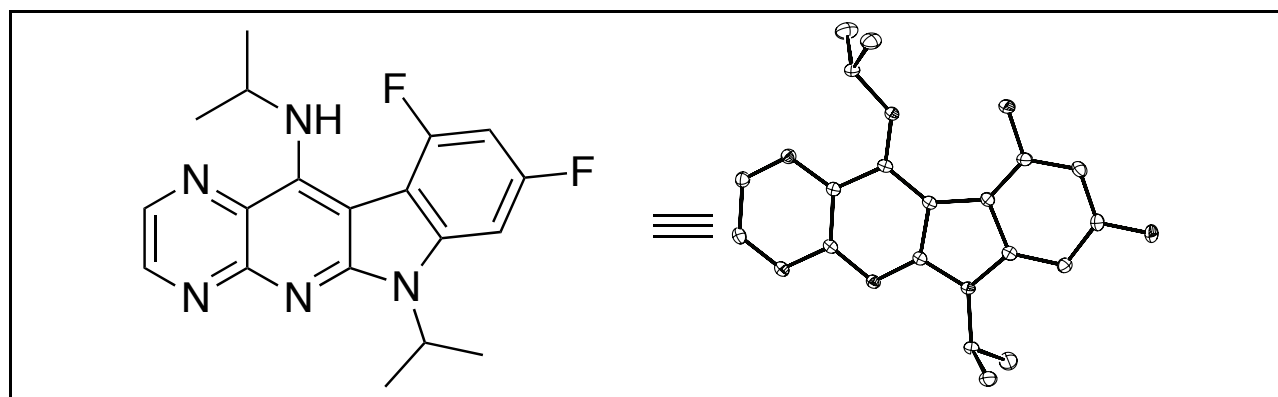

Compound 1346,  $C_{19}H_{19}N_5F_2$ , crystallizes in the triclinic space group  $P\bar{1}$  with  $a=6.7843(6)\text{\AA}$ ,  $b=10.9039(8)\text{\AA}$ ,  $c=12.5675(10)\text{\AA}$ ,  $\alpha=67.575(4)^\circ$ ,  $\beta=87.517(4)^\circ$ ,  $\gamma=84.897(4)^\circ$ ,  $V=855.93(12)\text{\AA}^3$ ,  $Z=2$ , and  $d_{\text{calc}}=1.379\text{ g/cm}^3$ . X-ray intensity data were collected on a Bruker APEXII CCD area detector employing graphite-monochromated Mo-K $\alpha$  radiation ( $\lambda=0.71073\text{ \AA}$ ) at a temperature of 143(1)K. Preliminary indexing was performed from a series of thirty-six  $0.5^\circ$  rotation frames with exposures of 10 seconds. A total of 2916 frames were collected with a crystal to detector distance of 37.6 mm, rotation widths of  $0.5^\circ$  and exposures of 20 seconds:

| scan type | $2\theta$ | $\omega$ | $\phi$ | $\chi$ | frames |
|-----------|-----------|----------|--------|--------|--------|
| $\phi$    | 19.50     | 59.55    | 348.71 | -26.26 | 739    |
| $\omega$  | 7.00      | 0.92     | 261.23 | -20.60 | 192    |
| $\phi$    | -23.00    | 315.83   | 257.18 | 28.88  | 219    |
| $\phi$    | -10.50    | 336.23   | 38.95  | 73.66  | 531    |
| $\phi$    | -10.50    | 300.13   | 17.77  | 39.97  | 739    |
| $\phi$    | 22.00     | 14.84    | 145.80 | 97.50  | 496    |

Rotation frames were integrated using SAINT<sup>i</sup>, producing a listing of unaveraged  $F^2$  and  $\sigma(F^2)$  values which were then passed to the SHELXTL<sup>ii</sup> program package for further processing and structure solution. A total of 39187 reflections were measured over the ranges  $1.75 \leq \theta \leq 25.39^\circ$ ,  $-8 \leq h \leq 8$ ,  $-11 \leq k \leq 13$ ,  $0 \leq l \leq 15$  yielding 3103 unique reflections ( $R_{\text{int}} = 0.0268$ ). The intensity data were corrected for Lorentz and polarization effects and for absorption using SADABS<sup>iii</sup> (minimum and maximum transmission 0.7123, 0.7452).

The structure was solved by direct methods (SHELXS-97<sup>iv</sup>). Refinement was by full-matrix least

squares based on  $F^2$  using SHELXL-97.<sup>v</sup> All reflections were used during refinement. The weighting scheme used was  $w=1/[\sigma^2(F_o^2) + (0.0486P)^2 + 0.2795P]$  where  $P = (F_o^2 + 2F_c^2)/3$ . Non-hydrogen atoms were refined anisotropically and hydrogen atoms were refined using a riding model. Refinement converged to  $R1=0.0342$  and  $wR2=0.0883$  for 2637 observed reflections for which  $F > 4\sigma(F)$  and  $R1=0.0424$  and  $wR2=0.0917$  and  $GOF = 1.035$  for all 3103 unique, non-zero reflections and 240 variables.<sup>vi</sup> The maximum  $\Delta/\sigma$  in the final cycle of least squares was 0.001 and the two most prominent peaks in the final difference Fourier were  $+0.191$  and  $-0.211 e/\text{\AA}^3$ .

Table 1. lists cell information, data collection parameters, and refinement data. Final positional and equivalent isotropic thermal parameters are given in Tables 2. and 3. Anisotropic thermal parameters are in Table 4. Tables 5. and 6. list bond distances and bond angles. Figure 1. is an ORTEP<sup>vii</sup> representation of the molecule with 30% probability thermal ellipsoids displayed.

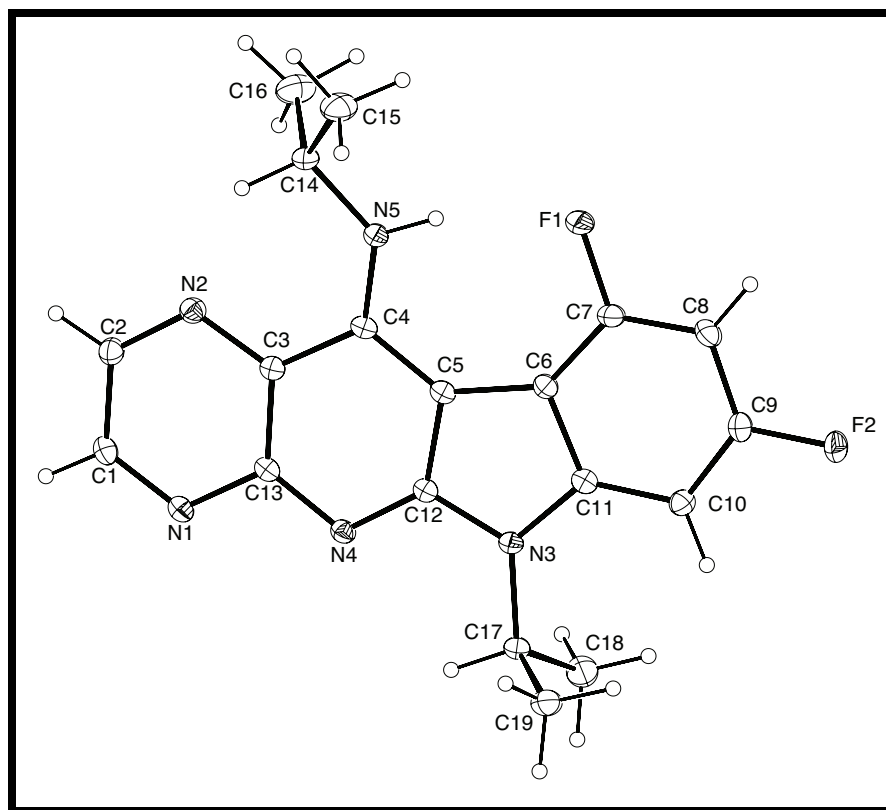

Figure 1. ORTEP drawing of the title compound with 30% probability thermal ellipsoids.

**Table 1. Summary of Structure Determination of Compound 1346**

|                                   |                                                               |
|-----------------------------------|---------------------------------------------------------------|
| Empirical formula                 | C <sub>19</sub> H <sub>19</sub> N <sub>5</sub> F <sub>2</sub> |
| Formula weight                    | 355.39                                                        |
| Temperature                       | 143(1) K                                                      |
| Wavelength                        | 0.71073 Å                                                     |
| Crystal system                    | triclinic                                                     |
| Space group                       | P $\bar{1}$                                                   |
| Cell constants:                   |                                                               |
| a                                 | 6.7843(6) Å                                                   |
| b                                 | 10.9039(8) Å                                                  |
| c                                 | 12.5675(10) Å                                                 |
| $\alpha$                          | 67.575(4)°                                                    |
| $\beta$                           | 87.517(4)°                                                    |
| $\gamma$                          | 84.897(4)°                                                    |
| Volume                            | 855.93(12) Å <sup>3</sup>                                     |
| Z                                 | 2                                                             |
| Density (calculated)              | 1.379 Mg/m <sup>3</sup>                                       |
| Absorption coefficient            | 0.101 mm <sup>-1</sup>                                        |
| F(000)                            | 372                                                           |
| Crystal size                      | 0.38 x 0.08 x 0.03 mm <sup>3</sup>                            |
| Theta range for data collection   | 1.75 to 25.39°                                                |
| Index ranges                      | -8 ≤ h ≤ 8, -11 ≤ k ≤ 13, 0 ≤ l ≤ 15                          |
| Reflections collected             | 39187                                                         |
| Independent reflections           | 3103 [R(int) = 0.0268]                                        |
| Completeness to theta = 25.39°    | 98.9 %                                                        |
| Absorption correction             | Semi-empirical from equivalents                               |
| Max. and min. transmission        | 0.7452 and 0.7123                                             |
| Refinement method                 | Full-matrix least-squares on F <sup>2</sup>                   |
| Data / restraints / parameters    | 3103 / 0 / 240                                                |
| Goodness-of-fit on F <sup>2</sup> | 1.035                                                         |
| Final R indices [I > 2σ(I)]       | R1 = 0.0342, wR2 = 0.0883                                     |
| R indices (all data)              | R1 = 0.0424, wR2 = 0.0917                                     |
| Largest diff. peak and hole       | 0.191 and -0.211 e.Å <sup>-3</sup>                            |



**Table 2. Refined Positional Parameters for Compound 1346**

| Atom | x           | y           | z           | $U_{eq}, \text{\AA}^2$ |
|------|-------------|-------------|-------------|------------------------|
| C1   | 0.2579(2)   | 0.20417(14) | 0.57814(12) | 0.0238(3)              |
| C2   | 0.2484(2)   | 0.23618(13) | 0.67632(12) | 0.0239(3)              |
| C3   | 0.25158(18) | 0.45642(13) | 0.56282(11) | 0.0185(3)              |
| C4   | 0.25143(18) | 0.59421(13) | 0.55015(11) | 0.0187(3)              |
| C5   | 0.24492(18) | 0.68663(13) | 0.43598(11) | 0.0188(3)              |
| C6   | 0.24031(19) | 0.83054(13) | 0.38033(11) | 0.0195(3)              |
| C7   | 0.2317(2)   | 0.93879(14) | 0.41333(12) | 0.0240(3)              |
| C8   | 0.2289(2)   | 1.06883(14) | 0.33710(12) | 0.0265(3)              |
| C9   | 0.2332(2)   | 1.09044(13) | 0.22160(12) | 0.0240(3)              |
| C10  | 0.2409(2)   | 0.99140(13) | 0.17891(12) | 0.0227(3)              |
| C11  | 0.24497(19) | 0.86152(13) | 0.25946(11) | 0.0200(3)              |
| C12  | 0.25131(18) | 0.63860(13) | 0.34557(11) | 0.0181(3)              |
| C13  | 0.25689(18) | 0.42410(13) | 0.46225(11) | 0.0186(3)              |
| C14  | 0.2964(2)   | 0.56170(14) | 0.76111(11) | 0.0243(3)              |
| C15  | 0.4326(3)   | 0.63943(17) | 0.79986(14) | 0.0371(4)              |
| C16  | 0.1053(3)   | 0.53960(18) | 0.82919(14) | 0.0406(4)              |
| C17  | 0.2675(2)   | 0.72811(14) | 0.12946(11) | 0.0228(3)              |
| C18  | 0.0817(2)   | 0.78776(16) | 0.05784(13) | 0.0347(4)              |
| C19  | 0.4550(2)   | 0.78083(15) | 0.06379(13) | 0.0314(3)              |
| N1   | 0.26116(17) | 0.29462(11) | 0.47308(10) | 0.0226(3)              |
| N2   | 0.24485(16) | 0.35927(11) | 0.66958(10) | 0.0222(3)              |
| N3   | 0.25252(16) | 0.74459(11) | 0.24054(9)  | 0.0197(3)              |
| N4   | 0.25857(16) | 0.51450(11) | 0.35295(9)  | 0.0198(3)              |
| N5   | 0.25866(18) | 0.63514(11) | 0.63810(10) | 0.0252(3)              |
| F1   | 0.22582(15) | 0.91794(8)  | 0.52761(7)  | 0.0375(2)              |
| F2   | 0.22848(13) | 1.21800(8)  | 0.14399(7)  | 0.0309(2)              |

$U_{eq} = \frac{1}{3}[U_{11}(aa^*)^2 + U_{22}(bb^*)^2 + U_{33}(cc^*)^2 + 2U_{12}aa^*bb^*\cos\gamma + 2U_{13}aa^*cc^*\cos\beta + 2U_{23}bb^*cc^*\cos\alpha]$

**Table 3. Positional Parameters for Hydrogens in Compound 1346**

| Atom | x       | y      | z       | $U_{iso}, \text{\AA}^2$ |
|------|---------|--------|---------|-------------------------|
| H1   | 0.2622  | 0.1151 | 0.5878  | 0.032                   |
| H2   | 0.2446  | 0.1679 | 0.7485  | 0.032                   |
| H8   | 0.2243  | 1.1389 | 0.3623  | 0.035                   |
| H10  | 0.2432  | 1.0102 | 0.1002  | 0.030                   |
| H14  | 0.3645  | 0.4748 | 0.7715  | 0.032                   |
| H15a | 0.5544  | 0.6479 | 0.7567  | 0.056                   |
| H15b | 0.4596  | 0.5933 | 0.8804  | 0.056                   |
| H15c | 0.3700  | 0.7263 | 0.7870  | 0.056                   |
| H16a | 0.0414  | 0.6238 | 0.8241  | 0.061                   |
| H16b | 0.1328  | 0.4852 | 0.9083  | 0.061                   |
| H16c | 0.0201  | 0.4957 | 0.7985  | 0.061                   |
| H17  | 0.2764  | 0.6322 | 0.1468  | 0.030                   |
| H18a | -0.0329 | 0.7534 | 0.1033  | 0.052                   |
| H18b | 0.0881  | 0.7646 | -0.0087 | 0.052                   |
| H18c | 0.0731  | 0.8829 | 0.0338  | 0.052                   |
| H19a | 0.4462  | 0.8761 | 0.0384  | 0.047                   |
| H19b | 0.4704  | 0.7559 | -0.0017 | 0.047                   |
| H19c | 0.5671  | 0.7438 | 0.1132  | 0.047                   |
| H5   | 0.2372  | 0.7198 | 0.6187  | 0.034                   |

**Table 4. Refined Thermal Parameters (U's) for Compound 1346**

| Atom | U <sub>11</sub> | U <sub>22</sub> | U <sub>33</sub> | U <sub>23</sub> | U <sub>13</sub> | U <sub>12</sub> |
|------|-----------------|-----------------|-----------------|-----------------|-----------------|-----------------|
| C1   | 0.0254(7)       | 0.0185(7)       | 0.0285(8)       | -0.0099(6)      | -0.0016(6)      | -0.0017(5)      |
| C2   | 0.0269(8)       | 0.0206(7)       | 0.0231(7)       | -0.0069(6)      | -0.0010(6)      | -0.0028(5)      |
| C3   | 0.0146(6)       | 0.0213(7)       | 0.0204(7)       | -0.0089(6)      | -0.0008(5)      | -0.0009(5)      |
| C4   | 0.0157(6)       | 0.0225(7)       | 0.0212(7)       | -0.0118(6)      | 0.0006(5)       | -0.0022(5)      |
| C5   | 0.0170(7)       | 0.0204(7)       | 0.0212(7)       | -0.0106(6)      | 0.0005(5)       | -0.0019(5)      |
| C6   | 0.0178(7)       | 0.0201(7)       | 0.0216(7)       | -0.0089(6)      | 0.0001(5)       | -0.0013(5)      |
| C7   | 0.0300(8)       | 0.0249(7)       | 0.0198(7)       | -0.0113(6)      | 0.0017(6)       | -0.0035(6)      |
| C8   | 0.0319(8)       | 0.0210(7)       | 0.0302(8)       | -0.0136(6)      | 0.0007(6)       | -0.0035(6)      |
| C9   | 0.0243(7)       | 0.0189(7)       | 0.0270(8)       | -0.0063(6)      | -0.0004(6)      | -0.0028(5)      |
| C10  | 0.0234(7)       | 0.0233(7)       | 0.0209(7)       | -0.0078(6)      | -0.0011(5)      | -0.0022(5)      |
| C11  | 0.0173(7)       | 0.0222(7)       | 0.0229(7)       | -0.0109(6)      | -0.0005(5)      | -0.0022(5)      |
| C12  | 0.0152(6)       | 0.0201(7)       | 0.0202(7)       | -0.0092(5)      | -0.0010(5)      | -0.0008(5)      |
| C13  | 0.0152(6)       | 0.0203(7)       | 0.0227(7)       | -0.0110(6)      | -0.0008(5)      | -0.0010(5)      |
| C14  | 0.0325(8)       | 0.0239(7)       | 0.0186(7)       | -0.0104(6)      | -0.0016(6)      | -0.0020(6)      |
| C15  | 0.0461(10)      | 0.0423(10)      | 0.0301(9)       | -0.0199(7)      | -0.0021(7)      | -0.0120(7)      |
| C16  | 0.0425(10)      | 0.0510(10)      | 0.0322(9)       | -0.0190(8)      | 0.0093(7)       | -0.0134(8)      |
| C17  | 0.0301(8)       | 0.0222(7)       | 0.0187(7)       | -0.0106(6)      | -0.0016(6)      | -0.0012(6)      |
| C18  | 0.0415(9)       | 0.0345(9)       | 0.0309(8)       | -0.0152(7)      | -0.0132(7)      | 0.0022(7)       |
| C19  | 0.0396(9)       | 0.0308(8)       | 0.0256(8)       | -0.0127(6)      | 0.0069(6)       | -0.0061(6)      |
| N1   | 0.0240(6)       | 0.0207(6)       | 0.0254(6)       | -0.0115(5)      | -0.0004(5)      | -0.0012(5)      |
| N2   | 0.0231(6)       | 0.0224(6)       | 0.0222(6)       | -0.0092(5)      | -0.0006(5)      | -0.0029(5)      |
| N3   | 0.0234(6)       | 0.0197(6)       | 0.0177(6)       | -0.0091(5)      | -0.0005(4)      | -0.0018(4)      |
| N4   | 0.0211(6)       | 0.0200(6)       | 0.0207(6)       | -0.0103(5)      | -0.0012(4)      | -0.0014(4)      |
| N5   | 0.0395(7)       | 0.0187(6)       | 0.0194(6)       | -0.0094(5)      | -0.0012(5)      | -0.0019(5)      |
| F1   | 0.0703(7)       | 0.0236(5)       | 0.0226(5)       | -0.0132(4)      | 0.0032(4)       | -0.0058(4)      |
| F2   | 0.0441(5)       | 0.0169(4)       | 0.0289(5)       | -0.0052(3)      | -0.0018(4)      | -0.0034(3)      |

The form of the anisotropic displacement parameter is:

$$\exp[-2\pi(a^2U_{11}h^2+b^2U_{22}k^2+c^2U_{33}l^2+2b^*c^*U_{23}kl+2a^*c^*U_{13}hl+2a^*b^*U_{12}hk)]$$

**Table 5. Bond Distances in Compound 1346, Å**

|         |            |         |            |         |            |
|---------|------------|---------|------------|---------|------------|
| C1-N1   | 1.3131(18) | C1-C2   | 1.402(2)   | C2-N2   | 1.3104(18) |
| C3-N2   | 1.3577(17) | C3-C13  | 1.4341(18) | C3-C4   | 1.4491(18) |
| C4-N5   | 1.3447(17) | C4-C5   | 1.4039(18) | C5-C12  | 1.4187(18) |
| C5-C6   | 1.4519(18) | C6-C7   | 1.3885(19) | C6-C11  | 1.4244(19) |
| C7-F1   | 1.3651(16) | C7-C8   | 1.374(2)   | C8-C9   | 1.378(2)   |
| C9-F2   | 1.3590(16) | C9-C10  | 1.373(2)   | C10-C11 | 1.3903(19) |
| C11-N3  | 1.3796(17) | C12-N4  | 1.3172(17) | C12-N3  | 1.3838(17) |
| C13-N4  | 1.3514(17) | C13-N1  | 1.3635(17) | C14-N5  | 1.4664(17) |
| C14-C16 | 1.508(2)   | C14-C15 | 1.517(2)   | C17-N3  | 1.4722(17) |
| C17-C19 | 1.519(2)   | C17-C18 | 1.5255(19) |         |            |

**Table 6. Bond Angles in Compound 1346, °**

|             |            |            |            |            |            |
|-------------|------------|------------|------------|------------|------------|
| N1-C1-C2    | 122.82(13) | N2-C2-C1   | 122.10(13) | N2-C3-C13  | 120.60(12) |
| N2-C3-C4    | 119.79(12) | C13-C3-C4  | 119.61(12) | N5-C4-C5   | 120.57(12) |
| N5-C4-C3    | 124.62(12) | C5-C4-C3   | 114.80(11) | C4-C5-C12  | 118.68(12) |
| C4-C5-C6    | 135.46(12) | C12-C5-C6  | 105.81(11) | C7-C6-C11  | 115.70(12) |
| C7-C6-C5    | 137.53(13) | C11-C6-C5  | 106.77(11) | F1-C7-C8   | 116.66(12) |
| F1-C7-C6    | 119.48(12) | C8-C7-C6   | 123.86(13) | C7-C8-C9   | 116.87(13) |
| F2-C9-C10   | 117.28(12) | F2-C9-C8   | 118.31(12) | C10-C9-C8  | 124.41(13) |
| C9-C10-C11  | 116.53(13) | N3-C11-C10 | 128.53(12) | N3-C11-C6  | 108.84(11) |
| C10-C11-C6  | 122.63(12) | N4-C12-N3  | 121.87(11) | N4-C12-C5  | 128.52(12) |
| N3-C12-C5   | 109.61(11) | N4-C13-N1  | 115.32(11) | N4-C13-C3  | 124.53(12) |
| N1-C13-C3   | 120.15(12) | N5-C14-C16 | 110.91(12) | N5-C14-C15 | 107.87(12) |
| C16-C14-C15 | 112.20(12) | N3-C17-C19 | 111.85(11) | N3-C17-C18 | 111.57(11) |
| C19-C17-C18 | 112.43(12) | C1-N1-C13  | 116.93(12) | C2-N2-C3   | 117.36(12) |
| C11-N3-C12  | 108.97(10) | C11-N3-C17 | 127.81(11) | C12-N3-C17 | 123.18(11) |
| C12-N4-C13  | 113.74(11) | C4-N5-C14  | 131.70(12) |            |            |

---

<sup>i</sup>Bruker (2009) SAINT. Bruker AXS Inc., Madison, Wisconsin, USA.

<sup>ii</sup>Bruker (2009) SHELXTL. Bruker AXS Inc., Madison, Wisconsin, USA.

<sup>iii</sup>Sheldrick, G.M. (2007) SADABS. University of Gottingen, Germany.

<sup>iv</sup>Sheldrick, G.M. (2008) Acta Cryst. A64,112-122.

<sup>v</sup>Sheldrick, G.M. (2008) Acta Cryst. A64,112-122.

<sup>vi</sup> $R1 = \sum |F_o| - |F_c| / \sum |F_o|$

$wR2 = [\sum w(F_o^2 - F_c^2)^2 / \sum w(F_o^2)^2]^{1/2}$

$GOF = [\sum w(F_o^2 - F_c^2)^2 / (n - p)]^{1/2}$

where n = the number of reflections and p = the number of parameters refined.

<sup>vii</sup>“ORTEP-II: A Fortran Thermal Ellipsoid Plot Program for Crystal Structure Illustrations”. C.K. Johnson (1976) ORNL-5138.
